# Supplementary material for: Trends in HIV testing in the UK primary care setting: a 15-year retrospective cohort study from 2000 to 2015
Source: PubMed Central journal article supplement — BMJ Open. 2019 Nov 24;9(11):e027744. doi: 10.1136/bmjopen-2018-027744 (PMC6887055; doi:10.1136/bmjopen-2018-027744), 2019-11-24
Supplement: bmjopen-2018-027744.draft_revisions.pdf [file bmjopen-2018-027744.draft_revisions.pdf]

# BMJ Open

BMJ Open is committed to open peer review. As part of this commitment we make the peer review history of every article we publish publicly available.

When an article is published we post the peer reviewers' comments and the authors' responses online. We also post the versions of the paper that were used during peer review. These are the versions that the peer review comments apply to.

The versions of the paper that follow are the versions that were submitted during the peer review process. They are not the versions of record or the final published versions. They should not be cited or distributed as the published version of this manuscript.

BMJ Open is an open access journal and the full, final, typeset and author-corrected version of record of the manuscript is available on our site with no access controls, subscription charges or pay-per-view fees (<http://bmjopen.bmj.com>).

If you have any questions on BMJ Open's open peer review process please email [info.bmjopen@bmj.com](mailto:info.bmjopen@bmj.com)

# BMJ Open

## Trends in HIV testing in the UK Primary Care setting: A 15 year retrospective cohort study 2000 to 2015

|                               |                                                                                                                                                                                                                                                                                                                                                                                                                                                                                                                                                                                                                                                                                                                                                                                                                                                                                                                                                                                   |
|-------------------------------|-----------------------------------------------------------------------------------------------------------------------------------------------------------------------------------------------------------------------------------------------------------------------------------------------------------------------------------------------------------------------------------------------------------------------------------------------------------------------------------------------------------------------------------------------------------------------------------------------------------------------------------------------------------------------------------------------------------------------------------------------------------------------------------------------------------------------------------------------------------------------------------------------------------------------------------------------------------------------------------|
| Journal:                      | <i>BMJ Open</i>                                                                                                                                                                                                                                                                                                                                                                                                                                                                                                                                                                                                                                                                                                                                                                                                                                                                                                                                                                   |
| Manuscript ID                 | bmjopen-2018-027744                                                                                                                                                                                                                                                                                                                                                                                                                                                                                                                                                                                                                                                                                                                                                                                                                                                                                                                                                               |
| Article Type:                 | Research                                                                                                                                                                                                                                                                                                                                                                                                                                                                                                                                                                                                                                                                                                                                                                                                                                                                                                                                                                          |
| Date Submitted by the Author: | 08-Nov-2018                                                                                                                                                                                                                                                                                                                                                                                                                                                                                                                                                                                                                                                                                                                                                                                                                                                                                                                                                                       |
| Complete List of Authors:     | Gompels, Mark; North Bristol NHS Trust, Department of Immunology, Southmead Hospital<br>Michael, Skevi; University of Bristol, School of Mathematics<br>Davies, Charlotte; University of Bristol, Department of Population Health Sciences, Bristol Medical School<br>Jones, Tim; University of Bristol; University Hospitals Bristol NHS Foundation Trust, The National Institute for Health Research Collaboration for Leadership in Applied Health Research and Care West (NIHR CLAHRC West)<br>Macleod, John; University of Bristol, Population Health Sciences, Bristol Medical School; University of Bristol, The National Institute of Health Research Health Protection Research Unit (NIHR HPRU) in Evaluation of Interventions<br>May, Margaret; University of Bristol, Population Health Sciences, Bristol Medical School; University of Bristol, The National Institute of Health Research Health Protection Research Unit (NIHR HPRU) in Evaluation of Interventions |
| Keywords:                     | PRIMARY CARE, HIV & AIDS < INFECTIOUS DISEASES, HIV testing, CPRD                                                                                                                                                                                                                                                                                                                                                                                                                                                                                                                                                                                                                                                                                                                                                                                                                                                                                                                 |
|                               |                                                                                                                                                                                                                                                                                                                                                                                                                                                                                                                                                                                                                                                                                                                                                                                                                                                                                                                                                                                   |

SCHOLARONE™  
Manuscripts

1  
2  
3  
4  
5 **Trends in HIV testing in the UK Primary Care setting: A 15 year retrospective cohort study 2000 to**  
6 **2015**  
7

8 M Gompels<sup>1</sup>, S Michael<sup>2</sup>, C F Davies<sup>3</sup>, T Jones<sup>3,4</sup>, John MacLeod<sup>3,5</sup>, M T May<sup>3,5</sup>  
9

10 **Short title: HIV testing in primary care**  
11

12 Target journal: BMJ

Version:11/10/2018

13  
14 <sup>1</sup> Dr Mark Gompels: Consultant HIV, Department of Immunology, Southmead Hospital, North Bristol  
15 NHS Trust, UK. Email: [Mark.Gompels@nbt.nhs.uk](mailto:Mark.Gompels@nbt.nhs.uk)  
16

17  
18 <sup>2</sup> Dr Skevi Michael: Senior Teaching Associate, School of Mathematics, University of Bristol, UK.  
19 Email: [Skevi.Michael@bristol.ac.uk](mailto:Skevi.Michael@bristol.ac.uk)  
20

21  
22 <sup>3</sup> Dr Charlotte F Davies: Senior Research Associate, Department of Population Health Sciences,  
23 Bristol Medical School, University of Bristol, UK. Email: [Charlotte.Davies@bristol.ac.uk](mailto:Charlotte.Davies@bristol.ac.uk)  
24

25  
26 <sup>3,4</sup> Dr Timothy Jones: Senior Research Associate, Department of Population Health Sciences, Bristol  
27 Medical School, University of Bristol, UK and The National Institute for Health Research  
28 Collaboration for Leadership in Applied Health Research and Care West (NIHR CLAHRC West) at  
29 University Hospitals Bristol NHS Foundation Trust, Bristol, UK. Email: [Timothy.Jones@bristol.ac.uk](mailto:Timothy.Jones@bristol.ac.uk)  
30

31  
32 <sup>3,5</sup> Professor John Macleod, Professor of Clinical Epidemiology and Primary Care, Department of  
33 Population Health Sciences, Bristol Medical School, University of Bristol, UK and The National  
34 Institute of Health Research Health Protection Research Unit (NIHR HPRU) in Evaluation of  
35 Interventions at University of Bristol, Bristol, UK. Email: [John.Macleod@bristol.ac.uk](mailto:John.Macleod@bristol.ac.uk)  
36  
37

38  
39 <sup>3,5</sup> Professor Margaret T May, Professor of Medical Statistics, Department of Population Health  
40 Sciences, Bristol Medical School, University of Bristol, UK and The National Institute of Health  
41 Research Health Protection Research Unit (NIHR HPRU) in Evaluation of Interventions at University  
42 of Bristol, Bristol, UK. Email: [Margaret.may@bristol.ac.uk](mailto:Margaret.may@bristol.ac.uk)  
43  
44  
45

46 **Corresponding author:**

47  
48 Prof. Margaret T. May  
49 Department of Population Health Sciences  
50 Bristol Medical School  
51 University of Bristol  
52 Bristol  
53 BS8 2PS  
54 UK Telephone: +44 117 9287287  
55

56 Fax: +44 117 928 7325  
57

58 [margaret.may@bristol.ac.uk](mailto:margaret.may@bristol.ac.uk)  
59  
60

**Alternative corresponding author:**

Dr. Charlotte F. Davies  
Department of Population Health Sciences  
Bristol Medical School  
University of Bristol  
Bristol  
BS8 2PS  
UK Telephone: +44 117 9287209  
Fax: +44 117 928 7325

[charlotte.davies@bristol.ac.uk](mailto:charlotte.davies@bristol.ac.uk)

Word Count: abstract 300, words 4656, 4 tables, 2 figures, 50 references, 1 supplementary figure, 2 supplementary tables, 1 web supplementary file (appendices 1-4)

**Abstract 300**

**Objectives:** To estimate trends in HIV testing, positivity and prevalence in UK Primary Care for 2000-2015 as part of a wider investigation into reasons for late diagnosis of HIV.

**Design:** Retrospective cohort study using the Clinical Practice Research Datalink (CPRD) which is derived from computerised clinical records produced during consultations in Primary Care.

**Setting:** 404 General Practices in England.

**Participants:** 5,979,598 adults aged > 16 years registered between 2000-2015 with 45,093,761 person years of observation.

**Outcomes:** Annual HIV testing rates, proportion of positive tests, and prevalence of HIV-infected people recorded in Primary care 2000-2015.

**Results:** HIV testing in Primary Care increased from 2000 to 2010, but then declined. Testing was higher in females than males and in those aged 16-44 years compared with older adults. Rates per 100,000 in women aged 16-44 years were 177 (95% CI 167-188); 1309 (1282-1336); 1789 (1757-1821) and 839 (817-862) in 2000, 2005, 2010 and 2015, respectively, and for non-pregnant women: 22.5 (19-26); 134 (125-143); 262 (250-275); 190 (179, 201). For men aged 16-44 years rates were: 26 (22-29); 107 (100-115); 196 (185-206); 137 (127-146). Over the study period, there were approximately 2 positive results per 1000 HIV tests. Men were eight-fold more likely to test positive than women. The percentage of HIV diagnoses among adults recorded in CPRD may be as low as 55% in London and 67% in the rest of the UK.

**Conclusions:** HIV testing rates in Primary Care peaked in 2010 and subsequently declined. Access to testing was higher for women despite the prevalence of HIV being higher in men.

**Implications and further research needed:**

Opportunities remain in Primary Care for increasing HIV testing to prevent costly late diagnoses and decrease HIV transmission. Interventions to improve targeting of tests and increase adherence to HIV testing guidelines are needed in Primary Care.

## Article summary

### Strengths and limitations of this study

- We investigated trends in HIV testing in Primary Care using high quality data from the Clinical Practice Research Datalink (CPRD) which is derived from computerised clinical records produced during consultations in Primary Care in England.
- CPRD provided anonymised Primary Care records on patients registered between 2000 and 2015 in 404 primary care practices in England which is likely to be representative of the general patient population.
- A limitation of the study is that not all General Practices contribute data to CPRD and therefore we cannot know whether the sample was representative.
- A major strength of the study was the large number of patients, nearly 6 million, which allowed us to contrast trends in HIV testing rates in Primary Care by sex, age, deprivation, rural/urban location and whether in London or not.
- Data were available for 15 years of follow up allowing us to show that HIV testing in Primary Care in England increased between 2000 and 2010, but then declined up to 2015 despite several NICE recommendations aimed at promoting testing in this setting.

## Introduction

In 2015 there were an estimated 89,800 (95% credible interval (CrI) 87,100-94,800) people living with HIV (PLWHIV) in England of whom approximately 15% (CrI 12-19%) were unaware of their infection<sup>1</sup>. Of those individuals newly diagnosed with HIV in 2015, 39% were diagnosed late, defined for surveillance purposes as having a CD4 count below 350 cells/mL within three months of diagnosis.<sup>2</sup> An estimated 1 in 4 of newly diagnosed individuals experienced a missed opportunity for an earlier diagnosis within the healthcare system in the preceding year.<sup>3</sup> Late diagnosis of HIV is associated with increased hospitalisations, decreased life expectancy,<sup>4-7</sup> and higher treatment and care costs to the NHS.<sup>8</sup> Importantly, individuals with undiagnosed HIV are likely to be responsible for the majority of transmissions because successfully treated individuals are unlikely to infect others.<sup>9</sup>

The UK HIV epidemic is concentrated among men-who-have-sex-with-men (MSM) and black African communities, therefore NICE has issued special guidance on increasing testing in these high risk groups<sup>10,11</sup> with an update in 2014.<sup>12</sup> Prevalence is also higher amongst injection drug users particularly in some geographical areas.<sup>1,2</sup> More recently, in 2016, NICE published practical guidelines on how to increase uptake of HIV testing in primary and secondary care, specialist sexual health services and the community.<sup>13</sup> Universal HIV testing is considered to be cost-effective in areas with a local diagnosed HIV prevalence that exceeds 2 per 1000 in adults aged 15-59 years.<sup>2,14</sup> In these high HIV prevalence areas recommendations are an HIV test should be routinely offered to all new GP registrations, those undergoing tests for other sexually transmitted infections or having blood tests for any reason, and all new hospital medical admissions.<sup>2,13</sup> However, the majority of people with HIV seek medical care for a related condition several times prior to their HIV diagnosis.<sup>15</sup> This may be presenting to general practice or hospital care, but without a high degree of clinical suspicion, the diagnosis is often missed.<sup>16</sup> BHIVA has published a list of indicator diseases which are more commonly found in those who are HIV positive than negative.<sup>17</sup> HIV testing is recommended in these cases, but recent surveys suggest poor adherence to guidelines.<sup>18,19</sup>

Expanding HIV testing is a national health priority<sup>20</sup> with recent NICE guidelines offering evidence based advice on the practicalities of how to do this in the UK and how to integrate HIV testing into usual clinical care.<sup>13</sup> Regardless of local HIV prevalence, a test should be routinely offered to patients in primary care when presenting with any HIV indicator condition and/or if patients are from a high risk group, for example, someone reporting an HIV positive partner or a history of injecting drug use or chemsex.<sup>13</sup> Despite this, evidence from systematic reviews shows that there are often many barriers to testing experienced by patients and equally by the healthcare providers (HCP).<sup>21-23</sup>

1  
2  
3 Patients presenting with clinical indicator conditions to their General Practitioner (GP) provide a  
4 valuable opportunity to diagnose HIV and avoid hospitalisations due to late diagnosis.<sup>24</sup> Research has  
5 shown that the majority of patients (up to 75%) newly diagnosed with HIV had been seen in the  
6 healthcare system within the 12 months prior to their diagnosis resulting in a missed opportunity to  
7 test.<sup>15,16,25</sup> Opt out HIV testing has been shown to be feasible, acceptable and cost effective in eight  
8 pilot studies conducted in community, primary and secondary care settings in high prevalence areas  
9 across England.<sup>20</sup> However, no recent evidence is available to know if HIV testing has been increasing  
10 and guidelines have been implemented over the country and not just in high risk areas.<sup>18,19</sup>

11  
12  
13 HIV testing in Primary Care has been reported only for the years 1995 to 2005 using data from the  
14 UK General Practice Research Database (GPRD).<sup>26</sup> This study showed that testing in primary care  
15 remained low, but increased steadily. In our study we investigated HIV testing rates in Primary Care  
16 10 years on. We analysed data from the same source collected between 2000 to 2015 to establish  
17 whether HIV testing had increased in primary care. We investigated differences in HIV testing rates  
18 and HIV diagnosis by demographic characteristics and estimated the prevalence of HIV recorded in  
19 Primary Care and compared it with estimates from national surveillance.

## 20 21 22 **Methods**

### 23 24 ***Population and data***

25 We used data from the Clinical Practice Research Datalink (CPRD), previously known as the General  
26 Practice Research Database (GPRD), which is derived from computerised clinical records produced  
27 during consultations in primary care. CPRD provided anonymised primary care records on patients  
28 registered between 2000 and 2015 in 404 primary care practices in England. Data were available on  
29 nearly 6 million people aged over 16 years old who are broadly representative of the adult UK  
30 population<sup>27</sup>. General Practitioners (GP) enter data on tests, diagnoses and symptoms using Read  
31 codes which are a hierarchical alphanumeric system similar to, but more extensive than  
32 International Classification of Disease (ICD) codes. The list of Read codes used to identify (1) HIV  
33 tests (2) HIV diagnoses, (3) pregnancy/delivery/abortion and (4) additional CPRD browser  
34 pregnancy medcodes are listed as appendices 1 to 4, respectively, in the supplementary file. We  
35 used individual level quintiles of the Index of Multiple Deprivation, 2015. Practices were classified as  
36 rural, urban conurbation, or city/town at lower super output level (a small area geographic boundary  
37 of around 1,500 people) in England based on Office for National Statistics classifications, 2011<sup>28</sup>, and  
38 as within or outside London. Ethnicity was grouped as Asian, Black African, Black Caribbean, Other,  
39 White, and unknown based on linked Hospital Episode Statistics data.



1  
2  
3 We used national surveillance data from Public Health England (PHE) on testing in Primary Care  
4 derived from general practices that submit HIV tests to laboratories participating in the Sentinel  
5 Surveillance of Blood Borne Virus Testing (SSBBV). These practices cover 35% of England's Primary  
6 Care population. HIV testing data is captured from 66% of the Primary Care population in extremely  
7 high prevalence areas (>5 /1000), 37% within high prevalence areas (>2/1000) and 29% within low  
8 prevalence areas. These data exclude any point of care tests (POCTs) carried out by GPs, and tests  
9 carried out as part of antenatal screening. The latest data available on testing rates and positivity  
10 were for 2015<sup>29</sup>. Data on HIV prevalence were derived from the HIV and AIDS Reporting System  
11 (HARS) and for earlier years the Survey of Prevalent HIV Infections Diagnosed (SOPHID).<sup>2</sup> These data  
12 were available up to 2015.  
13  
14  
15  
16  
17  
18  
19  
20  
21

### 22 **Patient and Public Involvement**

23 Public and Patients were not involved in the design of this study. Patient data from General Practices  
24 were contributed via CPRD and PHE surveillance as stated above.  
25  
26  
27

### 28 **Statistical methods**

#### 29 *HIV testing rate, positivity and prevalence of HIV recorded in primary care*

30 We estimated the HIV testing rates for each year between 2000-2015, overall and by patient  
31 demographics. Testing rates were estimated for males and females, for all ages and grouped by age  
32 (16-44, ≥ 45 years). We also estimated rates separately according to whether the practice was in  
33 London or not, and by type of location. For each calendar year, the denominator used to calculate the  
34 HIV testing rate was the number of patients who were in the CPRD cohort in that year satisfying the  
35 following inclusion criteria:  
36  
37  
38  
39  
40

- 41 (i) they were registered before the 30<sup>th</sup> June of that year
- 42 (ii) they did not transfer to another practice or die before the 30<sup>th</sup> June of that year
- 43 (iii) they were in the same practice for at least six months
- 44 (iv) they had not previously tested positive for HIV.

45 The numerator was the number of HIV tests carried out within the relevant year. For each patient in  
46 the denominator, the number of tests was calculated, disregarding repeat tests that were within a 3  
47 month period. Any test done or registered more than 90 days after the first recorded positive test was  
48 ignored.  
49

50 As the majority of HIV tests in women are carried out as part of antenatal screening, analyses for  
51 females were repeated excluding these tests. We identified women who were pregnant using either  
52 delivery dates or Read codes as follows:  
53  
54  
55  
56  
57  
58  
59  
60

- 1
- 2
- 3 (i) Delivery (birth) dates associated with the females in our data: An HIV test was considered ante-
- 4 natal if it occurred between 3-9 months before the recorded delivery date.
- 5
- 6 (ii) Read codes indicating any sign of pregnancy (antenatal): In this case an HIV test was considered
- 7 antenatal if it occurred within 6 months from the day the Read code was recorded.
- 8
- 9 (iii) Read codes associated with the postpartum period: In this case the HIV test was considered
- 10 antenatal if it occurred within 3-10 months before the corresponding record.
- 11
- 12 (iv) Read codes indicating any sign of miscarriage or abortion: An HIV test was recorded as ante-natal
- 13 if it occurred between 3 months prior to 3 months after the corresponding record.
- 14
- 15

16 The Read codes associated with pregnancy are listed in the supplementary material. The antenatal  
17 HIV tests were excluded from the numerator and the corresponding patients were removed from the  
18 denominator for the related period as well.

19 We plotted the trends in HIV testing rates per 100,000 person years for 2000-2015 separately for men  
20 and women (including and excluding ante-natal HIV tests) for all adults and restricted to those aged  
21 16-44 years old. In addition, we calculated the annual proportion of HIV tests that were positive for  
22 each year to investigate whether testing improved in terms of targeting during the later years.

23 For the years 2005, 2010 and 2015, we estimated and tabulated HIV testing rates and incidence rate  
24 ratios (IRR) with 95% confidence intervals from Poisson models for males and females separately  
25 according to whether practice was in London or not, by age, ethnicity, IMD, and by type of location.

26 We compared HIV testing rates recorded in CPRD with those from national surveillance data  
27 collected by PHE for 2015<sup>29</sup>. Finally, we estimated the prevalence of diagnosed HIV recorded in CPRD  
28 and compared this with estimated prevalence from national surveillance data collected by PHE using  
29 SOPHID and HARS. Data analysis was performed using STATA version 14.

## 30 RESULTS

31 Data were available on 5,979,598 distinct patients with 45,093,761 (males 22,155,768; females  
32 22,937,630) person years of observation. The demographic characteristics of included individuals are  
33 shown in Table 1. There were less males (48%) than females (52%). Practices (15%) and individuals  
34 (16%) in the most deprived quintile of IMD were under-represented in CPRD. The total number of  
35 HIV tests recorded in CPRD between 2000 and 2015 was 159,115 of which 357 (0.2%) were positive.

### 36 *Trends in HIV testing rates 2000-2015 in primary care*

37 Figure 1 shows the trend in HIV testing rates per 100,000 person years for the period 2000-2015 by  
38 gender and age group, with and without inclusion of antenatal testing. The main reason for HIV testing  
39 among women of child-bearing age was antenatal screening: the testing rates (per 100,000 person-

1  
2  
3 years) in all women aged 16-44 increased from 177 (95% CI 167-188) in 2000 to 1789 (1757-1821) in  
4  
5 2010 and then decreased to 839 (817, 862) in 2015, with the corresponding figures being 23 (19-26),  
6  
7 262 (250-275) and 190 (179-201) when antenatal testing was excluded. For males the corresponding  
8  
9 rates were 26 (22-29), 196 (185-206) and 137 (127-146) in 2000, 2010 and 2015, respectively. For the  
10  
11 whole period, HIV testing rates were higher in females than males (figure 1). This was true even when  
12  
13 HIV tests carried out as part of antenatal screening were excluded. HIV testing rates in primary care  
14  
15 peaked in females in 2010 (figure 1) and have declined markedly since then. In men and women not  
16  
17 tested ante-natally, HIV testing rates increased until 2012-2013, but have declined since. Similar  
18  
19 patterns were seen when data were restricted to those aged 16-44 years only, except that rates were  
20  
21 much higher in younger adults compared with those aged 45 years and over. HIV testing rates with  
22  
23 95% confidence intervals (CI) are listed for all years from 2000-2015 for males, females and females  
24  
25 excluding antenatal tests (supplementary table 1 all adults, supplementary table 2 for those aged 16-  
26  
27 44 years).

#### 28 *Trends in positive HIV diagnosis in primary care*

29 Although the number of HIV tests was much higher in women, more men tested positive:  
30  
31 196/20,328 (0.96%) men compared with 161/138,787 (0.12%) women. This was skewed by a very  
32  
33 low rate of positive diagnoses in younger females who were screened ante-natally. The smoothed  
34  
35 trend in the percentage of tests that were positive for men and women of different ages is shown in  
36  
37 figure 2 (plot of raw data is shown in supplementary\_figure 1). Percentage positive (excluding ante-  
38  
39 natal tests), was similar in men and women before 2005, but declined more sharply in women  
40  
41 thereafter. The percentage of tests that were positive peaked around 2003 and have fallen sharply  
42  
43 since 2010, indicating that there is no evidence of better targeting of testing in later years.

#### 44 *HIV testing rates in practices within and outside London, by age and deprivation index*

45 HIV testing rates were two-fold higher in London compared with outside London for both men and  
46  
47 women in 2005 and this differential increased in 2010 and 2015. Table 2 and table 3 give the testing  
48  
49 rates for years 2005, 2010 and 2015 for males and females (excluding antenatal tests), respectively,  
50  
51 stratified by whether the practices were in London or outside London. Data for all years between 2000  
52  
53 and 2015 are given for all adults (supplementary table 1) and for adults aged 16-44 years  
54  
55 (supplementary table 2). In more recent years practices outside London but in conurbations had  
56  
57 higher rates than those in cities or towns, which in turn had higher rates than rural practices. Although  
58  
59 testing rates in men in London practices decreased between 2010 and 2015 overall from 273 (251-  
60  
295) to 246 (225-266) per 100,000 person-years, there was evidence of a shift in targeting of testing

1  
2  
3 since rates increased in older men from 151 (127-176) to 180 (154-206) per 100,000 person-years and  
4 in the most deprived quintile from 415 (351-480) to 565 (487-643) per 100,000 person-years. This  
5 targeting effect was also seen among women in London practices, but not in practices outside London.  
6 However, in 2015 in London it remained the case that older people were less likely to be tested:  
7 incidence rate ratio (IRR) for age  $\geq 45$  compared with 16-44 years was 0.59 (0.50-0.71) for men and  
8 0.46 (0.38-0.55) in women. The corresponding IRR for outside London were much lower: IRR for age  $\geq$   
9 45 compared with 16-44 years was 0.37 (0.32-0.43) in men and 0.18 (0.16-0.21) in women. In contrast,  
10 by 2015 the most deprived group were 2- or 3-fold more likely to be tested than the least deprived,  
11 depending on gender and locality, with IRR for IMD quintile 5 versus 1 increasing markedly from 2005  
12 through to 2015 (table 2 (males) and table 3 (females)).  
13  
14  
15  
16  
17  
18  
19  
20  
21

#### 22 *HIV testing rates and positivity according to national surveillance data*

23 For comparison, national surveillance data for 2015 estimated that General Practices in extremely  
24 high prevalence areas defined as greater than 5/1000 population (comparable with "London" in our  
25 CPRD study) carried out the highest number of tests per practice population, 860 per 100 000 person  
26 years. This was nearly double the coverage rate of General Practices in high diagnosed prevalence  
27 areas defined as greater than 2/1000 population (440/100 000), and ten times the coverage rate  
28 among General Practices in low diagnosed prevalence areas (90/100 000). The estimates from  
29 surveillance were higher than our estimates from CPRD (table 2 and table 3). The proportion of  
30 positive tests among those tested in Primary Care estimated from SSBBV surveillance data was 0.4%  
31 in 2015<sup>29</sup>. This varied from 0.5% in very high prevalence areas to 0.2% in low prevalence areas and  
32 was consistent with our estimated positivity (figure 2).  
33  
34  
35  
36  
37  
38  
39  
40  
41

#### 42 *Prevalence of recorded HIV in CPRD and comparison with national surveillance estimates*

43 In 2015 the prevalence of diagnosed HIV recorded in CPRD was 2.8 per 1000 adult patients in  
44 London practices and 0.8 per 1000 in the rest of the UK (table 4). According to PHE surveillance, in  
45 2015 HIV prevalence in UK was estimated to be 1.6 per 1000, and excluding undiagnosed HIV was  
46 1.3 per 1000 population.<sup>2</sup> The HIV prevalence in London was estimated to be 4.7 per 1000,  
47 substantially higher than the rest of the UK at 1.1 per 1000. The corresponding observed prevalence,  
48 that is, excluding undiagnosed cases of HIV, was 4.2 and 0.9 per 1000 population in London and the  
49 rest of the UK, respectively.<sup>2</sup> Therefore, only two-thirds of PLWHIV in London were likely known to  
50 General Practice whereas in the rest of the UK this increased to nearly 90%. However, these  
51 percentages are likely to be over-estimated as children aged  $<16$  years were not included in the  
52 CPRD calculations of prevalence but were included in PHE data. If we assume that 20% of the UK  
53  
54  
55  
56  
57  
58  
59  
60

1  
2  
3 population are aged <16 years old and that only 1000 children are living with HIV, then the  
4 prevalence of diagnosed HIV among adults could be as high as 5.1 and 1.2 per 1000 in London and  
5 outside London, respectively. The estimated percentage of HIV diagnoses among adults recorded in  
6 CPRD may be as low as 55% and 67% in London and the rest of the UK, respectively. In General  
7 Practices in London, prevalence of HIV recorded in CPRD was higher for males, older individuals,  
8 Black African ethnicity and most deprived quintile (table 4) with a similar pattern in practices outside  
9 London except that prevalence did not vary by age.  
10  
11  
12  
13  
14  
15  
16

## 17 Discussion

### 18 *Statement of principal findings*

19  
20  
21  
22 Our analysis of CPRD data on GP consultations recorded on approximately 6 million people living in  
23 the UK over a 15-year period, shows that the initial rise in HIV testing seen in Primary Care between  
24 2000 and 2010 reversed with a significant drop in the testing rates for HIV in primary care from  
25 2010. This is an unexpected finding as throughout this period prevalence of HIV has been increasing  
26 which should have engendered higher rates of testing in Primary Care, given the NICE  
27 recommendation to test all new registrants and those with HIV indicator conditions<sup>10,11</sup>. HIV testing  
28 rates in Primary Care were higher in women than men throughout the study period, even when tests  
29 for antenatal screening were excluded, despite HIV prevalence being higher in men. This resulted in  
30 men being eight-fold more likely to test positive than women in this setting. Over the 15-year period  
31 of the study, there were approximately 2 positive results per 1000 HIV tests. We did not find  
32 evidence of better targeting of HIV testing to individuals in more recent years as the percentage of  
33 tests that were positive peaked around 2003. Many individuals at high risk of HIV infection may  
34 choose to test in settings other than General Practice, such as sexual health clinics, which might  
35 make it harder to target HIV testing among the population attending primary care.  
36  
37  
38  
39  
40  
41  
42  
43  
44  
45

46 The pattern of HIV testing has also changed over time. Testing was two-fold higher in London than  
47 elsewhere and has increased in the groups and areas of high deprivation within London. This is  
48 reassuring as it also reflects the higher prevalence of HIV in these areas and indicates that HIV  
49 testing has become more geographically targeted. Overall, testing rates were higher in urban  
50 conurbations and cities than in rural areas reflecting the national prevalence figures<sup>2</sup>. Younger  
51 people were more likely to be tested than those aged 45 years and over, which reflects the incidence  
52 pattern for HIV. However, our data shows an increasing trend in the rate of testing among the older  
53 age group in London, but not elsewhere, which may have been driven by the recognition that among  
54 those with HIV infection the proportion diagnosed late is higher in older age groups<sup>30</sup>.  
55  
56  
57  
58  
59  
60

1  
2  
3 In 2015, the prevalence of HIV recorded in CPRD was over three-fold higher in London than  
4 elsewhere, but overall was substantially lower than the prevalence of diagnosed HIV estimated from  
5 PHE surveillance<sup>2</sup>. This may be due to HIV-positive individuals not using primary care or to non-  
6 disclosure of their HIV status to their GP, not recording of the diagnosis on GP systems, or to CPRD  
7 not including sufficient practices with high HIV prevalence. CPRD is broadly representative of  
8 Primary Care in the UK, but the UK HIV epidemic is concentrated in cities with approximately half of  
9 HIV-positive individuals living in London<sup>2</sup>. The estimated percentage of HIV diagnoses among adults  
10 that were recorded in CPRD increased between 2005 and 2015 but was still substantially lower in  
11 London than elsewhere. This trend may reflect the ageing HIV population's greater requirement of  
12 primary care services, decrease in stigma of disclosure, or better transfer and recording in Primary  
13 Care of positive results of HIV tests carried out in other settings in later years.  
14  
15  
16  
17  
18  
19  
20  
21

### 22 *Strengths and weaknesses of the study*

23  
24 This study is very large with data from nearly six million patients followed over fifteen years with  
25 detailed primary care records. This detailed coverage enabled us to accurately measure HIV testing  
26 rates according to the important factors of deprivation, urbanisation, gender, ethnicity and age.  
27 Records were collected prospectively and electronically over a significant time period; therefore, we  
28 were able to show clearly the trends that have occurred. Our analysis and the data collection may be  
29 biased by several factors. The CPRD only includes a sample of general practices, but this is broadly  
30 representative of Primary Care in the UK, and given the large numbers this is a sufficient sample size  
31 for estimates of testing rates to be accurate. We have shown the CPRD slightly under represents  
32 deprivation, in both individuals and GP practices. Whilst this may be the case, given the very large  
33 sample size, we think that we can still draw valuable conclusions from this data. This study can only  
34 show the rates of testing in Primary Care. What is clear, given the number of HIV positive patients, is  
35 that many patients will have been diagnosed in other healthcare settings. This implies that  
36 estimates of the prevalence of diagnosed HIV based on diagnoses recorded in CPRD will be under-  
37 estimates for the UK which we have shown by comparing with surveillance data from PHE.  
38  
39  
40  
41  
42  
43  
44  
45  
46  
47  
48

### 49 *Strengths and weaknesses in relation to other studies, discussing important differences in results*

50  
51 Although HIV testing in Primary Care has declined, the rates of late diagnosis (CD4 count less than  
52 350 cells/mL) have also declined from 50% in 2010 to 39% in 2015<sup>31</sup>, indicating a discordancy  
53 between the testing in Primary Care and diagnosis. This indicates that increased testing has occurred  
54 in other settings. Earlier diagnosis may be due to better detection in secondary care, either from  
55 screening or testing those with indicator conditions, or through other routes such as sexual health  
56 clinics, insurance requests or specialist testing services. However, we have shown a significant  
57  
58  
59  
60

1  
2  
3 decline in HIV testing in Primary Care since the previous analysis by Evans *et al*<sup>26</sup> on testing up to  
4 2005, and therefore we can look at increased testing in primary care as an option to improve early  
5 HIV detection rates.  
6  
7

#### 8 9 *Meaning of the study: possible explanations and implications for clinicians and policymakers*

10  
11 Since 2015, UK and international treatment guidelines<sup>32</sup> for those diagnosed with HIV recommend  
12 immediate treatment with antiretroviral therapy (ART) because of both the START trial<sup>33</sup> showing  
13 that delaying therapy was detrimental to individual health and the beneficial effects of treatment as  
14 prevention (TasP). Therefore, in recent years the majority of new infections will have been  
15 transmitted by those who were undiagnosed<sup>34</sup> because most patients who are diagnosed are treated  
16 with effective ART and unlikely to transmit HIV.<sup>9,35,36</sup> This change, together with pre-exposure  
17 prophylaxis (PrEP), has resulted in a decline in HIV infection rates for for the last 2 years<sup>37</sup>.

18  
19 Nevertheless, there are still opportunities for diagnosing HIV earlier in Primary Care whilst testing  
20 rates remain very low. Current UK testing guidelines<sup>37</sup> recommend people attending General  
21 Practices in areas of high HIV prevalence should be offered an HIV test at registration or when  
22 having a blood test if they have not had an HIV test in the past 12 months. People newly diagnosed  
23 with an HIV indicator condition should also be offered an HIV test. The aim is to diagnose HIV earlier  
24 as late diagnosis of HIV is associated with increased morbidity and mortality ( Sabin et al 2012).<sup>7,38,39</sup>  
25 Those who are diagnosed late may need acute care in hospital, are less able to benefit from ART,  
26 and are more expensive to treat. There are also huge benefits for diagnosing HIV earlier both for the  
27 individual in terms of quality of life and life expectancy<sup>6</sup> and a wider societal benefit of reduced  
28 transmission and lower NHS treatment costs. Each prevented infection saves an estimated £300,000  
29 in lifetime treatment costs.<sup>39,40</sup> According to PHE surveillance, in 2016, HIV test positivity rates in  
30 Primary Care in high (0.5%) and extremely high (0.4%) diagnosed HIV prevalence areas exceeded  
31 those seen in sexual health services, indicating that more testing should be carried out in primary  
32 care<sup>37</sup>.  
33  
34  
35  
36  
37  
38  
39  
40  
41  
42  
43  
44  
45  
46  
47  
48  
49

#### 50 *Unanswered questions and future research*

51  
52 Although it is a public health imperative, and target, to increase HIV testing and diagnosis, it is  
53 unclear how this could be implemented in Primary Care. A literature review undertaken of public  
54 and Health Care Professional (HCP) attitudes towards HIV testing in the UK showed that a proactive  
55 offer of an HIV test by the HCP was an important factor which could help increase testing rates.<sup>23</sup>  
56 Reasons for low levels of HIV testing by the HCP include fear/concern of offending patients,  
57  
58  
59  
60

1  
2  
3 inadequate knowledge/training on HIV, low awareness of current testing guidelines,  
4 underestimation of patient risk, insufficient time, competing priorities, perceived burdensome  
5 consent process and pre-test discussion.<sup>21-23,41</sup> Studies indicate a need for education and training on  
6 HIV testing for HCP in Primary Care to overcome these barriers to testing.<sup>18,42</sup> Adequate  
7  
8 interventions are needed to address these barriers so individuals can receive a timely HIV test and  
9 with it the important treatment benefits and care if found to be HIV positive. HCPs in the UK have  
10 opportunities to initiate HIV testing in at-risk individuals and reduce the proportion of undiagnosed  
11 infection.<sup>15,16</sup> Another literature review has provided evidence that HIV indicator conditions have  
12 the potential to be used more effectively as triggers for earlier HIV testing<sup>43</sup>. Opt-out testing can  
13 facilitate increased HIV testing as has been evident from a trial in emergency care setting<sup>44</sup>. When  
14 blood tests are carried out for any reason in primary care, there could also be an opt-out HIV test.  
15 Computer prompts based on risk algorithms are another strategy to support HIV testing<sup>45-49</sup> which  
16 could be based on electronic health records such as those in CPRD.  
17  
18  
19  
20  
21  
22  
23  
24  
25  
26  
27

28 Although the results shown here are for a UK based population the methodology may be applicable  
29 to other healthcare systems. They provide accurate testing rates and detection rates in Primary Care  
30 which are measures of HIV testing that can be used for international comparisons. The knowledge  
31 that earlier treatment (START study<sup>33</sup>) and the impact of treatment on reducing transmission (UK  
32 PHE data<sup>37</sup>), combined with the clear reduction in patient mortality and cost with avoidance of late  
33 and very late diagnosis, mean that it is essential to diagnose HIV as early as possible. A key part of  
34 this is the testing in primary care, based on a screening strategy or indicator conditions. These data  
35 inform us of the current situation on testing and will be useful in planning and evaluating  
36 interventions to improve this.  
37  
38  
39  
40  
41  
42

43 The data on the discrepancy between PHE and CPRD prevalence of HIV positive status being  
44 recorded is another finding of importance for planning. There are now new testing strategies such as  
45 home test and rapid testing outside of standard health care settings which may contribute to the  
46 decrease in testing in Primary Care. These need to have a strategy in their delivery to feed back to  
47 Primary Care to maximise the benefits to patients and their health networks.  
48  
49  
50  
51

### 52 53 54 55 *Conclusions*

56 HIV testing rates have declined in Primary Care in all age groups, although there has been a fall in  
57 late presentation. HIV testing rates are highest in London, and higher in urban areas than rural areas.  
58  
59  
60



1  
2  
3 Adherence to HIV testing guidelines<sup>10,11,17</sup> would likely increase the number of positive tests and help  
4 prevent late diagnosis. Further interventions to increase selectivity of testing (positive cases per test)  
5 may be required, either at the individual level using risk factors and HIV indicator conditions or at  
6 the practice level using knowledge of local HIV prevalence.  
7  
8  
9

### 10 11 12 13 **Contributor and guarantor information**

14  
15 MG and MM planned the research study and were responsible for study design. JM and TJ advised  
16 on study design. CD applied for ethics approval and did the literature search. TJ and CD obtained  
17 data from CPRD and helped with coding and extracting data. SM was responsible for statistical  
18 analyses, tables and graphs. MM, SM and MG wrote the first draft of the paper. All authors  
19 contributed to writing and revising the paper and agreed to submission. MM acts as guarantor for  
20 the conduct of the study, had full access to the data and made decision to publish.  
21  
22

### 23 **Ethics approval**

24  
25 The protocol was submitted to and approved by the independent scientific advisory committee for  
26 the CPRD (protocol ISAC number 16\_172A). The study was approved by the South West, Frenchay,  
27 Research Ethics Committee on the 19/09/2016 (REC reference 16/SW/0286).  
28

### 29 **Transparency statement**

30  
31 Margaret May affirms that the manuscript is an honest, accurate and transparent account of the  
32 study, and that no important aspects of the study have been omitted. The sponsor had no role in  
33 research or decision to publish.  
34

### 35 **Competing Interests statement**

36  
37 No authors have any competing interests.  
38

### 39 **Role of the funding source:**

40  
41 The study was supported by Research Capability Funding from North Bristol NHS Trust. This study is  
42 based in part on data from the Clinical Practice Research Datalink (CPRD) obtained under licence  
43 from the UK Medicines and Healthcare products Regulatory Agency. This report is independent  
44 research supported by the National Institute for Health Research (NIHR) Health Protection Research  
45 Unit (HPRU) in Evaluation of Interventions at University of Bristol in partnership with Public Health  
46 England. TJ's time is supported by the NIHR Collaboration for Leadership in Applied Health Research  
47 and Care West (CLAHRC West) at University Hospitals Bristol NHS Foundation Trust. MM is also  
48 supported by the NIHR Biomedical Research Centre at University Hospitals Bristol NHS Foundation  
49 Trust and the University of Bristol. However, the interpretation and conclusions contained in this  
50 report are those of the authors and not necessarily those of the NHS, the NIHR, CPRD or the  
51 Department of Health.  
52  
53

### 54 **Acknowledgements**

55  
56 We would like to thank the following authors; Joni Jackson, Natalia V. Lewis, Gene S Feder, Penny  
57 Whiting, Timothy Jones, John Macleod and Maria Theresa Redaniel<sup>50</sup> for sharing their medical  
58 codes to identify pregnancy, delivery and abortion used in our data analysis.  
59  
60

## Data sharing

No additional data available as use of the data was licensed by CPRD and therefore cannot be shared further.

## References

1. Brown AE, Kirwan PD, Chau C, Khawam J, Gill ON, VC. D. Public Health England, London. Towards elimination of HIV transmission, AIDS and HIV-related deaths in the UK – 2017 report. 2017.
2. Kirwan PC, C; Brown, AE; Delpech, VC; and contributors;. *HIV in the UK - 2016 report*. London: Public Health England;2016.
3. Ellis S, Curtis H, Ong ELC, British HIVAB, Stand BCA. HIV diagnoses and missed opportunities. Results of the British HIV Association (BHIVA) National Audit 2010. *Clinical Medicine*. 2012;12(5):430-434.
4. Chadborn TR, Delpech VC, Sabin CA, Sinka K, Evans BG. The late diagnosis and consequent short-term mortality of HIV-infected heterosexuals (England and Wales, 2000-2004). *AIDS*. 2006;20(18):2371-2379.
5. Girardi E, Sabin CA, Monforte AdA. Late diagnosis of HIV infection: Epidemiological features, consequences and strategies to encourage earlier testing. *Jaids-Journal of Acquired Immune Deficiency Syndromes*. 2007;46:S3-S8.
6. May M, Gompels M, Delpech V, et al. Impact of late diagnosis and treatment on life expectancy in people with HIV-1: UK Collaborative HIV Cohort (UK CHIC) Study. *British Medical Journal*. 2011;343(d6016).
7. Croxford S, Kitching A, Desai S, et al. Mortality and causes of death in people diagnosed with HIV in the era of highly active antiretroviral therapy compared with the general population: an analysis of a national observational cohort. *The Lancet Public Health*. 2017;2(1):e35-e46.
8. Beck EJ, Mandalia S, Sangha R, et al. The Cost-Effectiveness of Early Access to HIV Services and Starting cART in the UK 1996-2008. *PLoS One*. 2011;6(12).
9. Rodger AJ, Cambiano V, Bruun T, et al. Sexual Activity Without Condoms and Risk of HIV Transmission in Serodifferent Couples When the HIV-Positive Partner Is Using Suppressive Antiretroviral Therapy. *Jama-J Am Med Assoc*. 2016;316(2):171-181.
10. NICE. National Institute for Health and Care Excellence (NICE). Increasing the uptake of HIV testing among men who have sex with men. *NICE Public Health Guidance 34 (accessed 09/2014) <http://niceorguk>*. 2011.
11. NICE. National Institute for Health and Care Excellence (NICE). Increasing the uptake of HIV testing to reduce undiagnosed infection and prevent transmission among black African communities living in England. *NICE Public Health Guidance 33 (accessed 10/2014) <http://niceorguk>*. 2011.
12. NICE. National Institute for Health and Care Excellence (NICE). Review Decision: September 2014. Consideration of an update of the public health guidelines on increasing the uptake of HIV testing among black Africans in England (PH33) and increasing the uptake of HIV testing among men who have sex with men (PH34) (accessed 09/2014). *NICE Public Health Guidance 33 and 34 (accessed 09/2014) <http://niceorguk>*. 2014.
13. NICE. National Institute of Health and Care Excellence (NICE). HIV testing: increasing uptake among people who may have undiagnosed HIV. (accessed 09/2017) [niceorguk/guidance/ng60](http://niceorguk/guidance/ng60). 2016.
14. NICE. National Institute of Health and Care Excellence (NICE). HIV testing: increasing uptake among people who may have undiagnosed HIV. Economic assessment: resource impact of

- recommendations. March 2016 (accessed 07/2016) <https://www.nice.org.uk/guidance/GID-PHG91/documents/economic-report>. 2016.
15. Read P, Armstrong-James D, Tong CYW, Fox J. Missed opportunities for HIV testing-a costly oversight. *Qjm-an International Journal of Medicine*. 2011;104(5):421-424.
  16. Burns FM, Johnson AM, Nazroo J, et al. Missed opportunities for earlier HIV diagnosis within primary and secondary healthcare settings in the UK. *AIDS*. 2008;22(1):115-122.
  17. BHIVA. British HIV Association. UK National Guidelines for HIV testing 2008; (accessed 04/2016) <http://www.bhiva.org/HIVtesting2008.aspx>. 2008.
  18. Elmahdi R, Gerver SM, Guillen GG, Fidler S, Cooke G, Ward H. Low levels of HIV test coverage in clinical settings in the UK: a systematic review of adherence to 2008 guidelines. *Sex Transm Infect*. 2014;90(2):119-124.
  19. Hartney T, Kennedy I, Crook P, Nardone A. Expanded HIV testing in high-prevalence areas in England: results of a 2012 audit of sexual health commissioners. *HIV medicine*. 2014;15(4):251-254.
  20. Health Protection Agency (HPA). Time to test for HIV: expanding HIV testing in healthcare and community services in England (accessed 09/2017). 2011.
  21. Deblonde J, De Koker P, Hamers FF, Fontaine J, Luchters S, Temmerman M. Barriers to HIV testing in Europe: a systematic review. *European Journal of Public Health*. 2010;20(4):422-432.
  22. Bolsewicz K, Vallely A, Debattista J, Whittaker A, Fitzgerald L. Factors impacting HIV testing: a review - perspectives from Australia, Canada, and the UK. *Aids Care-Psychological and Socio-Medical Aspects of Aids/Hiv*. 2015;27(5):570-580.
  23. Davies C, Gompels M, May M. Public and Healthcare Practitioner attitudes towards HIV testing: Review of the evidence in the UK. *International STD Research and Reviews*. 2015;3(3):991-1022.
  24. Scognamiglio P, Chiaradia G, De Carli G, et al. The potential impact of routine testing of individuals with HIV indicator diseases in order to prevent late HIV diagnosis. *Bmc Infect Dis*. 2013;13.
  25. Goodall L, Leen C. Late diagnosis of HIV: could this be avoided? *Scott Med J*. 2011;56(2):84-86.
  26. Evans HER, Mercer CH, Rait G, et al. Trends in HIV testing and recording of HIV status in the UK primary care setting: a retrospective cohort study 1995-2005. *Sex Transm Infect*. 2009;85(7):520-526.
  27. Herrett E, Gallagher AM, Bhaskaran K, et al. Data Resource Profile: Clinical Practice Research Datalink (CPRD). *Int J Epidemiol*. 2015;44(3):827-836.
  28. Office for National statistics (ONS), Rural/Urban classifications. <https://www.ons.gov.uk/methodology/geography/geographicalproducts/ruralurbanclassifications/2011ruralurbanclassification> (accessed 07/2016)
  - 2011.
  29. Public Health England (PHE). Health Protection Report. Annual report from the sentinel surveillance study of blood borne virus testing in England: data for January to December 2015  
(Accessed July 2016)  
[https://assets.publishing.service.gov.uk/government/uploads/system/uploads/attachment\\_data/file/540332/hpr2416\\_bbvs.pdf](https://assets.publishing.service.gov.uk/government/uploads/system/uploads/attachment_data/file/540332/hpr2416_bbvs.pdf). 2016.
  30. Tavošchi L, Gomes Dias J, Pharris A. New HIV diagnoses among adults aged 50 years or older in 31 European countries, 2004-15: an analysis of surveillance data. *Lancet Hiv*. 2017;4(11):e514-e521.

- 1  
2  
3  
4  
5  
6  
7  
8  
9  
10  
11  
12  
13  
14  
15  
16  
17  
18  
19  
20  
21  
22  
23  
24  
25  
26  
27  
28  
29  
30  
31  
32  
33  
34  
35  
36  
37  
38  
39  
40  
41  
42  
43  
44  
45  
46  
47  
48  
49  
50  
51  
52  
53  
54  
55  
56  
57  
58  
59  
60
31. Public Health England (PHE). HIV: annual data tables. HIV surveillance data in the UK by demographic characteristics and geographical region. (Accessed 7/2016) <https://www.gov.uk/government/statistics/hiv-annual-data-tables>. 2015 (updated 2017).
  32. World Health Organisation (WHO). Guideline on when to start antiretroviral therapy and on pre-exposure prophylaxis for HIV. Geneva: World Health Organization, 2015 (<http://www.who.int/hiv/pub/guidelines/earlyrelease-arv/en>) (accessed 07/17). Sept 2015.
  33. Lundgren JD, Babiker AG, Gordin F, et al. Initiation of Antiretroviral Therapy in Early Asymptomatic HIV Infection. *The New England journal of medicine*. 2015;373(9):795-807.
  34. Marks G, Crepaz N, Janssen RS. Estimating sexual transmission of HIV from persons aware and unaware that they are infected with the virus in the USA. *Aids*. 2006;20(10):1447-1450.
  35. Vernazza P, Hirschel B, Bernasconi E, Flepp M. HIV transmission under highly active antiretroviral therapy. *Lancet*. 2008;372(9652):1806-1807.
  36. Cohen MS, Chen YQ, McCauley M, et al. Prevention of HIV-1 Infection with Early Antiretroviral Therapy. *New Engl J Med*. 2011;365(6):493-505.
  37. Nash SGF, M; Gill, O.N.; Connor, N.; and contributors;. *HIV testing in England: 2017 report*. . London: Public Health England; 1/11/2017 2017.
  38. Sabin C. Review of life expectancy in people with HIV in settings with optimal ART access: what we know and what we don't. *J Int Aids Soc*. 2012;15:4-4.
  39. Nakagawa F, Lodwick RK, Smith CJ, et al. Projected life expectancy of people with HIV according to timing of diagnosis. *Aids*. 2012;26(3):335-343.
  40. Fleishman JA, Yehia BR, Moore RD, Gebo KA, Network HR. The Economic Burden of Late Entry Into Medical Care for Patients With HIV Infection. *Med Care*. 2010;48(12):1071-1079.
  41. Hunter E, Perry M, Leen C, Premchand N. HIV testing: getting the message across—a survey of knowledge, attitudes and practice among non-HIV specialist physicians. *Postgraduate Medical Journal*. 2012;88(1036):59-65.
  42. Pillay TD, Mullineux J, Smith CJ, Matthews P. Unlocking the potential: longitudinal audit finds multifaceted education for general practice increases HIV testing and diagnosis. *Sex Transm Infect*. 2013;89(3):191-U125.
  43. Davies C, Gompels M, May M. Use and Effectiveness of HIV Indicator Conditions in Guiding HIV Testing: A Review of the Evidence  
*International STD Research & Reviews*. 2017;6(2):1-27.
  44. Montoy JC, Dow WH, Kaplan BC. Patient choice in opt-in, active choice, and opt-out HIV screening: randomized clinical trial. *BMJ (Clinical research ed)*. 2016;532:h6895.
  45. Federman D, Kravetz J, Vasquez L, ., Campbell S. Improving human immunodeficiency virus testing rates with an electronic clinical reminder. *The American Journal of Medicine*. 2012;125(3):240-242.
  46. Schrantz SJ, Babcock CA, Theodosis C, Brown S, Mercer S, Pillow MT ea. A targeted, conventional assay, emergency department HIV testing program integrated with existing clinical procedures. . *Ann Emerg Med*. 2011;58((1 Suppl 1)):S85-88.e81.
  47. Goetz MB, Hoang T, Bowman C, Knapp H, Rossman B, Smith R. A system-wide intervention to improve HIV testing in the Veterans Health Administration. . *J Gen Intern Med*. 2008;23(8):1200-1207.
  48. Menza TW HJ, Celum CL, Golden, MR. Prediction of HIV acquisition among men who have sex with men. . *Sex Transm Dis*. 2009;36(9):547-555.
  49. Sharghi N, Bosch RJ, Mayer K, Essex M, Seage GR. The development and utility of a clinical algorithm to predict early HIV-1 infection. . *J Acquir Immune Defic Syndr*. 2005;40(4):472-478.
  50. Jackson J, Lewis N, Feder G, et al. Exposure to domestic violence and abuse and consultations for emergency contraception: nested case-control study in a UK primary care dataset. Manuscript submitted for publication. 2018.

Table 1: Patient and practice demographics

| Demographic Variable                                                    | Group              | Frequency | Percentage (%) |
|-------------------------------------------------------------------------|--------------------|-----------|----------------|
| <b>Gender</b>                                                           | Males              | 2,871,884 | 48.03          |
|                                                                         | Females            | 3,107,562 | 51.97          |
|                                                                         | Other/Unknown      | 152       | 0.00           |
| <b>Age (in 2015)</b>                                                    | 16-44              | 2,684,443 | 44.89          |
|                                                                         | >44                | 3,295,155 | 55.11          |
| <b>Ethnicity</b>                                                        | Asian              | 147,295   | 2.46           |
|                                                                         | Black African      | 45,632    | 0.76           |
|                                                                         | Black Caribbean    | 28,558    | 0.48           |
|                                                                         | Other              | 118,934   | 1.99           |
|                                                                         | White              | 3,328,189 | 55.66          |
|                                                                         | Unknown            | 2,310,990 | 38.65          |
| <b>Region</b>                                                           | Outside London     | 4,693,116 | 78.49          |
|                                                                         | London             | 1,129,924 | 18.90          |
|                                                                         | Unknown            | 156,558   | 2.62           |
| <b>Urban/Rural</b>                                                      | Urban(Conurbation) | 2,134,497 | 35.70          |
|                                                                         | Urban(City/Town)   | 2,991,079 | 50.02          |
|                                                                         | Rural              | 697,452   | 11.66          |
|                                                                         | Unknown            | 156,558   | 2.62           |
| <b>Patient IMD (2015)</b><br>1=least deprived, ...,<br>5=most deprived  | Quintile 1         | 1,285,213 | 21.49          |
|                                                                         | Quintiles 2,3,4    | 3,564,936 | 59.62          |
|                                                                         | Quintile 5         | 964,853   | 16.14          |
|                                                                         | Unknown            | 164,596   | 2.75           |
| <b>Practice IMD (2015)</b><br>1=least deprived, ...,<br>5=most deprived | Quintile 1         | 1,249,293 | 20.89          |
|                                                                         | Quintiles 2,3,4    | 3,702,313 | 61.92          |
|                                                                         | Quintile 5         | 871,434   | 14.57          |
|                                                                         | Unknown            | 156,558   | 2.62           |

Table 2: Testing rates (per 100,000 person years) for **males** and incidence rate ratios (IRR) with 95% CI for years 2005, 2010, 2015.

| London                     |                |                    |         |                  |                     |         |                 |                    |         |
|----------------------------|----------------|--------------------|---------|------------------|---------------------|---------|-----------------|--------------------|---------|
|                            | 2005           |                    |         | 2010             |                     |         | 2015            |                    |         |
|                            | Rate (95% CI)  | IRR (95% CI)       | p-value | Rate (95% CI)    | IRR (95% CI)        | p-value | Rate (95% CI)   | IRR (95% CI)       | p-value |
| <b>Overall</b>             | 133 (117, 148) | -                  | -       | 273 (251, 295)   | -                   | -       | 246 (225, 266)  | -                  | -       |
| <b>Age</b>                 |                |                    |         |                  |                     |         |                 |                    |         |
| 16-44                      | 175 (151, 198) | 1                  | <0.0001 | 366 (333, 400)   | 1                   | <0.0001 | 304 (272, 336)  | 1                  | <0.0001 |
| >=45                       | 75 (56, 93)    | 0.43 (0.33, 0.56)  |         | 151 (127, 176)   | 0.41 (0.34, 0.50)   |         | 180 (154, 206)  | 0.59 (0.50, 0.71)  |         |
| <b>Ethnicity</b>           |                |                    |         |                  |                     |         |                 |                    |         |
| White                      | 102 (80, 125)  | 1                  |         | 240 (206, 275)   | 1                   |         | 222 (187, 256)  | 1                  |         |
| Asian                      | 152 (73, 232)  | 1.49 (0.85, 2.62)  | <0.0001 | 329 (220, 438)   | 1.37 (0.95, 1.96)   | <0.0001 | 167 (88, 247)   | 0.76 (0.47, 1.22)  | <0.0001 |
| Black African              | 669 (361, 977) | 6.53 (3.93, 10.85) |         | 1227 (849, 1605) | 5.10 (3.63, 7.18)   |         | 919 (602, 1236) | 4.15 (2.84, 6.06)  |         |
| Black Caribbean            | 216 (432, 389) | 2.11 (0.92, 4.82)  |         | 361 (148, 574)   | 1.50 (0.82, 2.76)   |         | 523 (267, 779)  | 2.36 (1.42, 3.95)  |         |
| <b>Patient IMD (2015)*</b> |                |                    |         |                  |                     |         |                 |                    |         |
| Quintile 1                 | 160 (119, 202) | 1                  |         | 207 (159, 254)   | 1                   |         | 200 (153, 248)  | 1                  |         |
| Quintiles 2,3,4            | 120 (102, 139) | 0.75 (0.56, 1.01)  | 0.0912  | 252 (226, 279)   | 1.22 (0.95, 1.57)   | <0.0001 | 177 (155, 198)  | 0.88 (0.68, 1.14)  | <0.0001 |
| Quintile 5                 | 155 (114, 195) | 0.96 (0.67, 1.40)  |         | 415 (351, 480)   | 2.01 (1.53, 2.65)   |         | 565 (487, 643)  | 2.82 (2.16, 3.68)  |         |
| Outside London             |                |                    |         |                  |                     |         |                 |                    |         |
|                            | 2005           |                    |         | 2010             |                     |         | 2015            |                    |         |
|                            | Rate (95% CI)  | IRR (95% C.I.)     | p-value | Rate (95% CI)    | IRR (95% C.I.)      | p-value | Rate (95% CI)   | IRR (95% C.I.)     | p-value |
| <b>Overall</b>             | 65 (60, 70)    | -                  | -       | 106 (100, 112)   | -                   | -       | 65 (60, 69)     | -                  | -       |
| <b>Age</b>                 |                |                    |         |                  |                     |         |                 |                    |         |
| 16-44                      | 95 (87, 103)   | 1                  | <0.0001 | 161 (150, 172)   | 1                   | <0.0001 | 100 (91, 109)   | 1                  | <0.0001 |
| >=45                       | 34 (29, 39)    | 0.36 (0.30, 0.42)  |         | 54 (48, 60)      | 0.34 (0.30, 0.38)   |         | 37 (32, 42)     | 0.37 (0.32, 0.43)  |         |
| <b>Ethnicity</b>           |                |                    |         |                  |                     |         |                 |                    |         |
| White                      | 63 (57, 69)    | 1                  |         | 100 (92, 108)    | 1                   |         | 63 (57, 70)     | 1                  |         |
| Asian                      | 159 (89, 229)  | 2.52 (1.61, 3.94)  | <0.0001 | 336 (245, 427)   | 3.36 (2.55, 4.44)   |         | 200 (135, 266)  | 3.16 (2.25, 4.45)  |         |
| Black African              | 579 (221, 937) | 9.17 (4.90, 17.16) |         | 1321 (859, 1783) | 13.24 (9.23, 18.97) |         | 584 (289, 878)  | 9.22 (5.51, 15.44) |         |
| Black Caribbean            | 185 (37, 366)  | 2.93 (1.09, 7.83)  |         | 506 (156, 856)   | 5.06 (2.86, 8.96)   |         | 202 (25, 379)   | 3.19 (1.32, 7.70)  |         |
| <b>Patient IMD (2015)*</b> |                |                    |         |                  |                     |         |                 |                    |         |
| Quintile 1                 | 60 (51, 69)    | 1                  |         | 98 (87, 110)     | 1                   |         | 61 (52, 70)     | 1                  |         |
| Quintiles 2,3,4            | 60 (54, 66)    | 1.0 (0.84, 1.20)   | 0.0002  | 94 (87, 101)     | 0.96 (0.83, 1.10)   | <0.0001 | 53 (48, 59)     | 0.87 (0.73, 1.04)  | <0.0001 |
| Quintile 5                 | 89 (75, 104)   | 1.49 (1.20, 1.86)  |         | 163 (145, 182)   | 1.66 (1.41, 1.96)   |         | 115 (99, 131)   | 1.89 (1.55, 2.31)  |         |
| <b>Urban/Rural class</b>   |                |                    |         |                  |                     |         |                 |                    |         |
| Conurbation                | 65 (55, 76)    | 1                  |         | 144 (129, 159)   | 1                   |         | 91 (79, 102)    | 1                  |         |
| City/Town                  | 69 (63, 75)    | 1.05 (0.88, 1.26)  | 0.0045  | 100 (93, 107)    | 0.70 (0.61, 0.79)   | <0.0001 | 60 (54, 65)     | 0.66 (0.56, 0.77)  | <0.0001 |
| Rural                      | 47 (37, 58)    | 0.72 (0.55, 0.95)  |         | 75 (62, 88)      | 0.52 (0.43, 0.64)   |         | 49 (39, 60)     | 0.55 (0.43, 0.70)  |         |

\*1=least deprived - 5=most deprived

Table 3: Testing rates (per 100000 person years) for **females** and incidence rate ratios (IRR) with 95% CI for years 2005, 2010, 2015 (antenatal testing excluded)

| London                     |                |                    |         |                 |                   |         |                |                    |         |
|----------------------------|----------------|--------------------|---------|-----------------|-------------------|---------|----------------|--------------------|---------|
|                            | 2005           | 2005               |         | 2010            | 2010              |         | 2015           | 2015               |         |
|                            | Rate (95% CI)  | IRR (95% CI)       | p-value | Rate (95% CI)   | IRR (95% CI)      | p-value | Rate (95% CI)  | IRR (95% CI)       | p-value |
| <b>Overall</b>             | 139 (123, 155) | -                  | -       | 309 (285, 332)  | -                 | -       | 243 (223, 264) | -                  | -       |
| <b>Age</b>                 |                |                    |         |                 |                   |         |                |                    |         |
| 16-44                      | 216 (189, 242) | 1                  |         | 479 (440, 517)  | 1                 |         | 327 (295, 360) | 1                  |         |
| >=45                       | 39 (26, 52)    | 0.18 (0.13, 0.26)  | <0.0001 | 93 (74, 112)    | 0.19 (0.16, 0.24) | <0.0001 | 150 (127, 173) | 0.46 (0.38, 0.55)  | <0.0001 |
| <b>Ethnicity</b>           |                |                    |         |                 |                   |         |                |                    |         |
| White                      | 120 (100, 140) | 1                  |         | 270 (239, 301)  | 1                 |         | 170 (144, 195) | 1                  |         |
| Asian                      | 199 (117, 280) | 1.65 (1.09, 2.51)  |         | 261 (183, 339)  | 0.97 (0.70, 1.33) |         | 190 (126, 254) | 1.12 (0.78, 1.62)  |         |
| Black African              | 415 (234, 596) | 3.46 (2.21, 5.43)  | <0.0001 | 825 (602, 1048) | 3.06 (2.29, 4.08) | <0.0001 | 728 (527, 929) | 4.30 (3.13, 5.87)  | <0.0001 |
| Black Caribbean            | 248 (96, 400)  | 2.06 (1.15, 3.72)  |         | 438 (260, 617)  | 1.63 (1.06, 2.48) |         | 399 (221, 578) | 2.35 (1.50, 3.70)  |         |
| <b>Patient IMD (2015)*</b> |                |                    |         |                 |                   |         |                |                    |         |
| Quintile 1                 | 153 (112, 194) | 1                  |         | 172 (130, 215)  | 1                 |         | 156 (115, 197) | 1                  |         |
| Quintiles 2,3,4            | 125 (106, 143) | 0.82 (0.60, 1.10)  | 0.0278  | 284 (258, 311)  | 1.65 (1.27, 2.14) | <0.0001 | 195 (173, 218) | 1.25 (0.95, 1.66)  | <0.0001 |
| Quintile 5                 | 183 (138, 227) | 1.19 (0.84, 1.71)  |         | 539 (463, 615)  | 3.13 (2.37, 4.14) |         | 520 (448, 592) | 3.33 (2.50, 4.46)  |         |
| Outside London             |                |                    |         |                 |                   |         |                |                    |         |
|                            | 2005           | 2005               |         | 2010            | 2010              |         | 2015           | 2015               |         |
|                            | Rate (95% CI)  | IRR (95% CI)       | p-value | Rate (95% CI)   | IRR (95% CI)      | p-value | Rate (95% CI)  | IRR (95% CI)       | p-value |
| <b>Overall</b>             | 67 (62, 71)    | -                  | -       | 117 (111, 123)  | -                 | -       | 83 (78, 89)    | -                  | -       |
| <b>Age</b>                 |                |                    |         |                 |                   |         |                |                    |         |
| 16-44                      | 118 (108, 127) | 1                  |         | 216 (204, 229)  | 1                 |         | 160 (148, 171) | 1                  |         |
| >=45                       | 21 (17, 24)    | 0.18 (0.15, 0.21)  | <0.0001 | 34 (29, 38)     | 0.16 (0.14, 0.18) | <0.0001 | 29 (25, 33)    | 0.18 (0.16, 0.21)  | <0.0001 |
| <b>Ethnicity</b>           |                |                    |         |                 |                   |         |                |                    |         |
| White                      | 67 (61, 72)    | 1                  |         | 117 (110, 125)  | 1                 |         | 77 (71, 83)    | 1                  |         |
| Asian                      | 188 (123, 252) | 2.82 (2.01, 3.95)  |         | 357 (284, 430)  | 3.04 (2.46, 3.77) |         | 207 (155, 259) | 2.69 (2.07, 3.50)  |         |
| Black African              | 515 (270, )    | 7.33 (4.77, 12.53) | <0.0001 | 829 (563, 1094) | 7.07 (5.13, 9.73) | <0.0001 | 432 (249, 616) | 5.63 (3.71, 8.53)  | <0.0001 |
| Black Caribbean            | 235 (61, 409)  | 3.53 (1.68, 7.44)  |         | 778 (468, 1087) | 6.63 (4.49, 9.79) |         | 489 (257, 721) | 6.36 (3.93, 10.30) |         |
| <b>Patient IMD (2015)*</b> |                |                    |         |                 |                   |         |                |                    |         |
| Quintile 1                 | 64 (54, 73)    | 1                  |         | 95 (84, 106)    | 1                 |         | 71 (61, 81)    | 1                  |         |
| Quintiles 2,3,4            | 61 (55, 67)    | 0.97 (0.81, 1.15)  | 0.0001  | 95 (88, 102)    | 1.00 (0.87, 1.15) | <0.0001 | 72 (65, 78)    | 1.01 (0.86, 1.19)  | <0.0001 |
| Quintile 5                 | 92 (77, 107)   | 1.45 (1.17, 1.79)  |         | 241 (218, 265)  | 2.54 (2.19, 2.95) |         | 152 (134, 170) | 2.15 (1.80, 2.57)  |         |
| <b>Urban/Rural class</b>   |                |                    |         |                 |                   |         |                |                    |         |
| Conurbation                | 54 (45, 64)    | 1                  |         | 165 (148, 181)  | 1                 |         | 120 (106, 133) | 1                  |         |
| City/Town                  | 72 (66, 78)    | 1.33 (1.10, 1.60)  | 0.0078  | 108 (101, 116)  | 0.66 (0.59, 0.74) | <0.0001 | 77 (70, 83)    | 0.64 (0.56, 0.74)  | <0.0001 |
| Rural                      | 62 (50, 74)    | 1.15 (0.89, 1.47)  |         | 85 (71, 99)     | 0.52 (0.43, 0.62) |         | 60 (48, 72)    | 0.50 (0.40, 0.62)  |         |

\*1=least deprived - 5=most deprived

Table 4: Prevalence (with 95% CI) of diagnosed HIV recorded in CPRD (per 100,000 persons) by gender, age, ethnicity and patient IMD, for London and outside London.

| <b>London</b>             |                            |                   |                   |
|---------------------------|----------------------------|-------------------|-------------------|
|                           | <b>Prevalence (95% CI)</b> |                   |                   |
|                           | <b>2005</b>                | <b>2010</b>       | <b>2015</b>       |
| All                       | 140 (129, 151)             | 230 (216, 244)    | 282 (267, 297)    |
| <b>Gender</b>             |                            |                   |                   |
| Males                     | 191 (172, 209)             | 294 (271, 317)    | 369 (344, 395)    |
| Females                   | 91 (78, 103)               | 170 (153, 187)    | 199 (181, 217)    |
| <b>Age</b>                |                            |                   |                   |
| 16-44                     | 168 (152, 184)             | 234 (215, 253)    | 229 (210, 249)    |
| >44                       | 103 (88, 117)              | 226 (205, 247)    | 341 (316, 365)    |
| <b>Ethnicity</b>          |                            |                   |                   |
| White                     | 127 (112, 143)             | 183 (164, 202)    | 224 (202, 246)    |
| Asian                     | 45 (17, 72)                | 84 (50, 119)      | 96 (60, 131)      |
| Black African             | 1465 (1205, 1726)          | 2350 (2055, 2646) | 2597 (2294, 2899) |
| Black Caribbean           | 195 (97, 294)              | 431 (291, 572)    | 538 (381, 695)    |
| <b>Patient IMD (2015)</b> |                            |                   |                   |
| Quantile 1                | 32 (19, 45)                | 86 (65, 107)      | 121 (96, 146)     |
| Quantiles 2,3,4           | 136 (122, 149)             | 212 (195, 228)    | 256 (238, 274)    |
| Quantile 5                | 268 (230, 306)             | 444 (397, 491)    | 544 (492, 596)    |
| <b>Outside London</b>     |                            |                   |                   |
|                           | <b>Prevalence (95% CI)</b> |                   |                   |
|                           | <b>2005</b>                | <b>2010</b>       | <b>2015</b>       |
| All                       | 38 (36, 41)                | 64 (61, 67)       | 81 (77, 85)       |
| <b>Gender</b>             |                            |                   |                   |
| Males                     | 50 (46, 54)                | 81 (76, 86)       | 105 (99, 110)     |
| Females                   | 26 (23, 29)                | 48 (44, 52)       | 58 (54, 62)       |
| <b>Age</b>                |                            |                   |                   |
| 16-44                     | 55 (51, 59)                | 78 (72, 83)       | 82 (76, 87)       |
| >44                       | 22 (19, 25)                | 52 (48, 56)       | 80 (76, 85)       |
| <b>Ethnicity</b>          |                            |                   |                   |
| White                     | 29 (26, 32)                | 46 (43, 50)       | 60 (56, 64)       |
| Asian                     | 37 (16, 59)                | 40 (21, 59)       | 55 (34, 76)       |
| Black African             | 2537 (2110, 2964)          | 3663 (3236, 4091) | 3933 (3514, 4353) |
| Black Caribbean           | 135 (35, 236)              | 347 (195, 499)    | 484 (308, 660)    |
| <b>Patient IMD (2015)</b> |                            |                   |                   |
| Quantile 1                | 19 (16, 23)                | 31 (26, 35)       | 42.58 (37, 48)    |
| Quantiles 2,3,4           | 35 (32, 38)                | 60 (56, 65)       | 77 (72, 81)       |
| Quantile 5                | 82 (72, 91)                | 132 (121, 144)    | 159 (146, 172)    |



1  
2  
3  
4  
5  
6  
7  
8  
9  
10  
11  
12  
13  
14  
15  
16  
17  
18  
19  
20  
21  
22  
23  
24  
25  
26  
27  
28  
29  
30  
31  
32  
33  
34  
35  
36  
37  
38  
39  
40  
41  
42  
43  
44  
45  
46  
47  
48  
49  
50  
51  
52  
53  
54  
55  
56  
57  
58  
59  
60

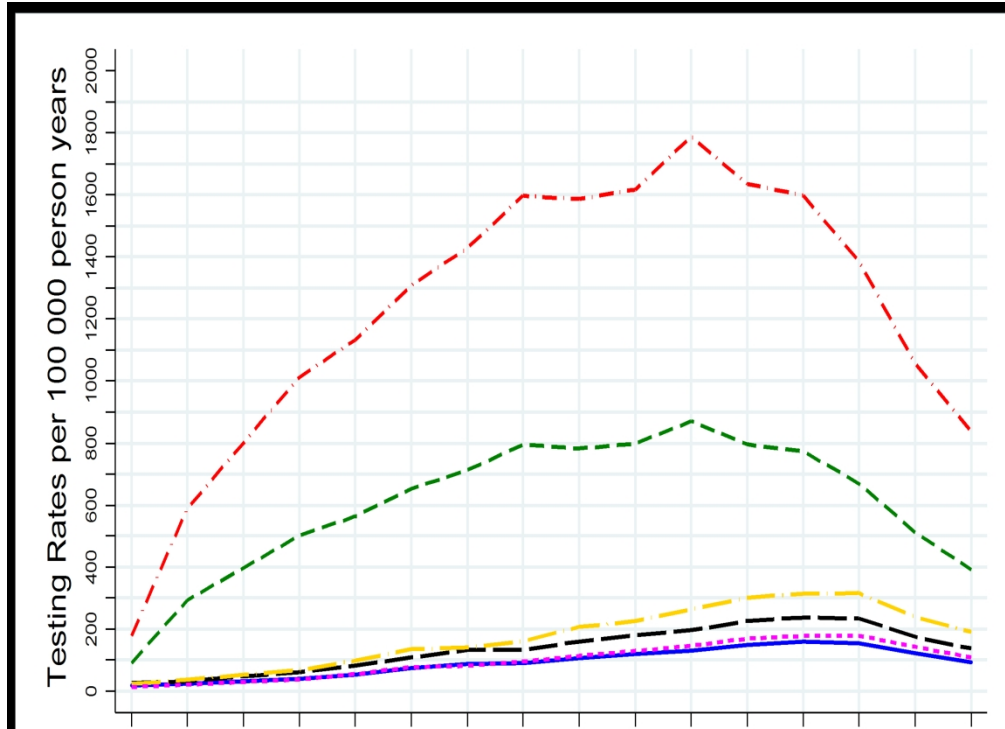

Figure 1: Trend in HIV testing rates per 100,000 person years for the period 2000-2015 by gender and age group, with and without inclusion of antenatal testing.

283x207mm (300 x 300 DPI)

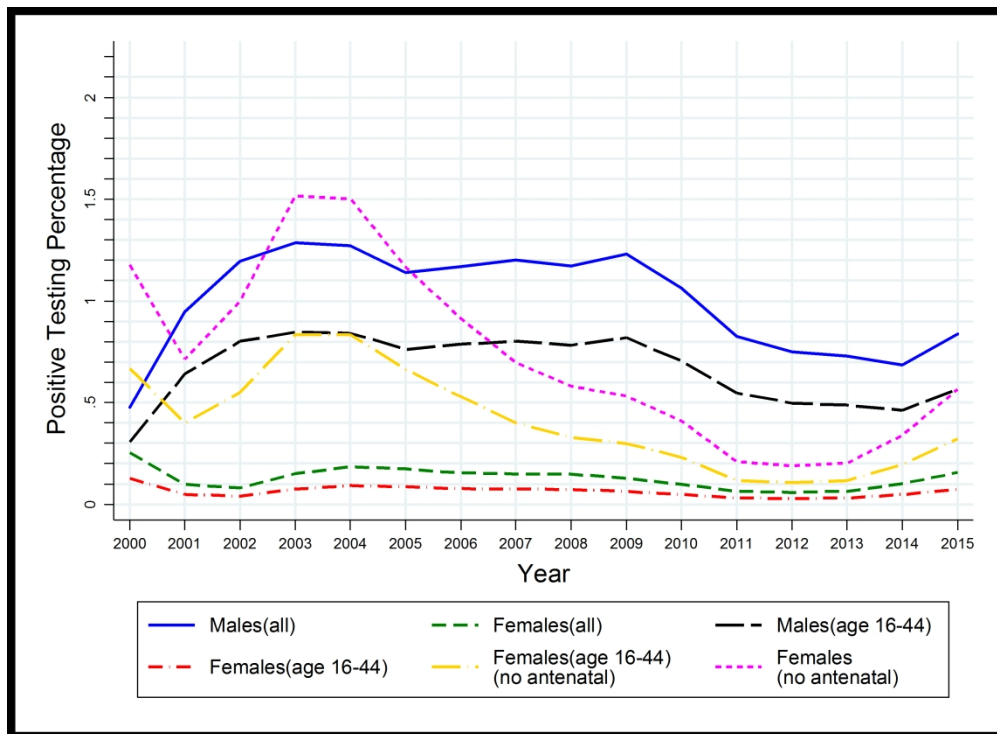

Figure 2: Trend in the percentage of HIV tests that were positive for the period 2000-2015 by gender and age group, with and without inclusion of antenatal testing.

283x207mm (300 x 300 DPI)

1  
2  
3  
4  
5  
6  
7  
8  
9  
10  
11  
12  
13  
14  
15  
16  
17  
18  
19  
20  
21  
22  
23  
24  
25  
26  
27  
28  
29  
30  
31  
32  
33  
34  
35  
36  
37  
38  
39  
40  
41  
42  
43  
44  
45  
46  
47  
48  
49  
50  
51  
52  
53  
54  
55  
56  
57  
58  
59  
60

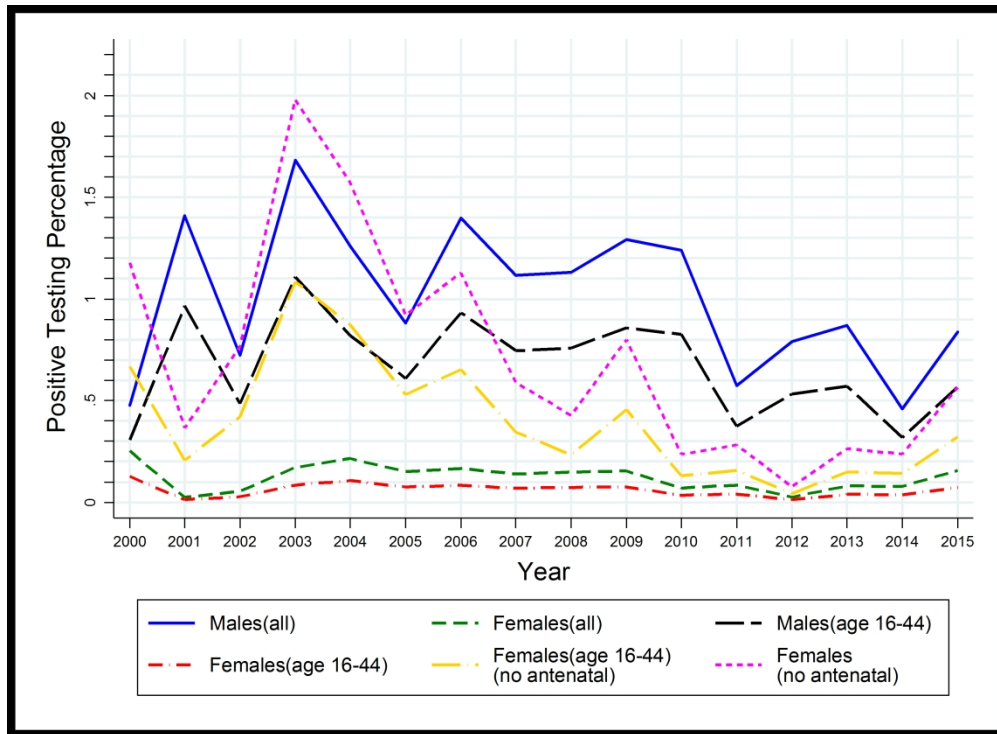

Supplementary figure: Trend (unsmoothed graph) in the percentage of HIV tests that were positive for the period 2000-2015 by gender and age group, with and without inclusion of antenatal testing.

283x207mm (300 x 300 DPI)

### Trends in HIV testing in the UK Primary Care setting: A 15 year retrospective cohort study 2000 to 2015

#### Supplementary tables

Supplementary table 1: HIV testing rates (per 100,000 person years) for years 2000-2015 (adults >16 years).

| Year | Males, all |       |                 | Females, all |       |                 | Females, excluding antenatal |       |                 |
|------|------------|-------|-----------------|--------------|-------|-----------------|------------------------------|-------|-----------------|
|      | N          | Rate  | 95% C.I.        | N            | Rate  | 95% C.I.        | N                            | Rate  | 95% C.I.        |
| 2000 | 1277056    | 16.4  | (14.2 , 18.7)   | 1332528      | 89.0  | (83.9 , 94.1)   | 1331517                      | 12.8  | (10.8 , 14.7)   |
| 2001 | 1299140    | 21.9  | (19.3 , 24.4)   | 1352604      | 293.1 | (283.9 , 302.3) | 1348950                      | 20.2  | (17.8 , 22.7)   |
| 2002 | 1317701    | 31.4  | (28.3 , 34.5)   | 1367949      | 396.3 | (385.7 , 406.9) | 1363158                      | 28.7  | (25.8 , 31.6)   |
| 2003 | 1341378    | 39.9  | (36.5 , 43.3)   | 1388107      | 501.9 | (490.0 , 513.7) | 1382140                      | 36.5  | (33.3 , 39.8)   |
| 2004 | 1359662    | 52.5  | (48.6 , 56.4)   | 1403681      | 563.0 | (550.5 , 575.5) | 1397351                      | 54.7  | (50.7 , 58.7)   |
| 2005 | 1374451    | 74.2  | (69.6 , 78.8)   | 1418325      | 653.1 | (639.7 , 666.6) | 1411272                      | 77.0  | (72.3 , 81.6)   |
| 2006 | 1390451    | 87.5  | (82.5 , 92.4)   | 1433622      | 711.6 | (697.7 , 725.6) | 1426111                      | 80.9  | (76.0 , 85.7)   |
| 2007 | 1405428    | 89.4  | (84.3 , 94.4)   | 1447828      | 795.2 | (780.5 , 809.9) | 1439651                      | 94.3  | (89.1 , 99.4)   |
| 2008 | 1409645    | 106.6 | (101.1 , 112.1) | 1455081      | 781.9 | (767.4 , 796.5) | 1447676                      | 113.1 | (107.4 , 118.7) |
| 2009 | 1418613    | 120.0 | (114.3 , 125.8) | 1463654      | 797.9 | (783.2 , 812.6) | 1456530                      | 128.6 | (122.6 , 134.6) |
| 2010 | 1424751    | 130.2 | (124.2 , 136.2) | 1470650      | 870.7 | (855.4 , 886.0) | 1463009                      | 145.3 | (139.0 , 151.6) |
| 2011 | 1421140    | 147.2 | (140.8 , 153.6) | 1474837      | 795.9 | (781.2 , 810.5) | 1468256                      | 169.0 | (162.1 , 175.8) |
| 2012 | 1427981    | 159.5 | (152.9 , 166.2) | 1482930      | 772.8 | (758.4 , 787.1) | 1476875                      | 176.7 | (169.7 , 183.6) |
| 2013 | 1430211    | 152.9 | (146.4 , 159.4) | 1486620      | 669.5 | (656.2 , 682.9) | 1481702                      | 178.9 | (171.9 , 185.9) |
| 2014 | 1436279    | 121.6 | (115.8 , 127.4) | 1487194      | 511.7 | (500.1 , 523.4) | 1483581                      | 141.8 | (135.6 , 148.1) |
| 2015 | 1421880    | 92.5  | (87.4 , 97.6)   | 1472023      | 391.5 | (381.2 , 401.7) | 1469400                      | 108.4 | (103.0 , 113.9) |

Supplementary table 2: HIV testing rates (per 100,000 person years) for years 2000-2015 (adults aged 16-44 years).

| Year | Males, all |       |                 | Females, all |        |                   | Females, excluding antenatal |       |                 |
|------|------------|-------|-----------------|--------------|--------|-------------------|------------------------------|-------|-----------------|
|      | N          | Rate  | 95% C.I.        | N            | Rate   | 95% C.I.          | N                            | Rate  | 95% C.I.        |
| 2000 | 671088     | 25.5  | (21.6 , 29.4)   | 655488       | 177.4  | (167.2 , 187.7)   | 654477                       | 22.5  | (18.8 , 26.1)   |
| 2001 | 681216     | 31.9  | (27.6 , 36.2)   | 665358       | 589.8  | (571.2 , 608.3)   | 661708                       | 35.8  | (31.2 , 40.4)   |
| 2002 | 688746     | 46.8  | (41.5 , 52.0)   | 672213       | 799.5  | (778.0 , 821.0)   | 667427                       | 52.3  | (46.7 , 57.8)   |
| 2003 | 698982     | 60.5  | (54.7 , 66.4)   | 681748       | 1012.9 | (989.0 , 1036.9)  | 675788                       | 66.7  | (60.5 , 73.0)   |
| 2004 | 706120     | 80.9  | (74.1 , 87.6)   | 688504       | 1132.5 | (1107.2 , 1157.8) | 682186                       | 98.4  | (90.7 , 106.1)  |
| 2005 | 710489     | 107.4 | (99.7 , 115.1)  | 694232       | 1308.9 | (1281.8 , 1335.9) | 687190                       | 134.0 | (125.2 , 142.8) |
| 2006 | 714842     | 131.1 | (122.6 , 139.6) | 700086       | 1428.5 | (1400.4 , 1456.7) | 692589                       | 139.8 | (130.7 , 148.8) |
| 2007 | 717434     | 133.5 | (124.9 , 142.2) | 704167       | 1598.2 | (1568.4 , 1627.9) | 696009                       | 160.6 | (151.0 , 170.3) |
| 2008 | 711542     | 159.1 | (149.7 , 168.5) | 702985       | 1586.6 | (1556.9 , 1616.3) | 695600                       | 206.5 | (195.4 , 217.5) |
| 2009 | 708782     | 181.0 | (170.9 , 191.1) | 700970       | 1618.4 | (1588.3 , 1648.5) | 693867                       | 225.9 | (214.3 , 237.4) |
| 2010 | 702732     | 195.7 | (185.2 , 206.2) | 696368       | 1789.0 | (1757.3 , 1820.6) | 688743                       | 262.4 | (250.0 , 274.7) |
| 2011 | 690732     | 225.9 | (214.5 , 237.2) | 689820       | 1636.2 | (1605.6 , 1666.7) | 683258                       | 301.1 | (287.7 , 314.5) |
| 2012 | 685037     | 236.9 | (225.3 , 248.6) | 685234       | 1598.0 | (1567.8 , 1628.2) | 679201                       | 313.2 | (299.6 , 326.8) |
| 2013 | 675812     | 232.6 | (221.0 , 244.2) | 677984       | 1385.4 | (1357.0 , 1413.7) | 673088                       | 315.1 | (301.4 , 328.9) |
| 2014 | 668263     | 174.8 | (164.6 , 185.0) | 667048       | 1056.2 | (1031.2 , 1081.2) | 663464                       | 238.6 | (226.5 , 250.8) |
| 2015 | 639033     | 136.6 | (127.4 , 145.9) | 638248       | 839.3  | (816.5 , 862.1)   | 635636                       | 190.1 | (179.0 , 201.1) |

1  
2  
3 **Trends in HIV testing in the UK Primary Care setting: A 15 year retrospective cohort study 2000 to**  
4 **2015**  
5  
6  
7

8 **Supplementary Material**  
9

10  
11 **Page 2 Appendix 1: Read & OXMIS codes denoting an HIV test used to identify patients who have**  
12 **ever had a HIV test recorded in primary care (Evans *et al* 2009<sup>26</sup>)**  
13

14  
15 **Page 3 Appendix 2: Read & OXMIS codes denoting HIV positive status used to identify HIV positive**  
16 **patients who have their HIV positive status recorded in primary care (Evans *et al* 2009<sup>26</sup>).**  
17

18  
19 **Page 4 Appendix 3: Pregnancy/Delivery/Abortion medcodes (Jackson *et al* <sup>50</sup>)**  
20  
21  
22  
23  
24  
25  
26  
27  
28  
29  
30  
31  
32  
33  
34  
35  
36  
37  
38  
39  
40  
41  
42  
43  
44  
45  
46  
47  
48  
49  
50  
51  
52  
53  
54  
55  
56  
57  
58  
59  
60

**Appendix 1: Read & OXMIS codes denoting an HIV test used to identify patients who have ever had a HIV test recorded in primary care (Evans *et al* 2009<sup>26</sup>)**

| Code    | READ/<br>OXMIS | Code description                                             | Certainty of<br>HIV+ test |
|---------|----------------|--------------------------------------------------------------|---------------------------|
| 6827.11 | READ           | HIV screening                                                | Definite                  |
| 43C..00 | READ           | HTLV-3 antibody test                                         | Definite                  |
| 43C..11 | READ           | Aids antibody test                                           | Definite                  |
| 43C..12 | READ           | Human immunodeficiency viral test                            | Definite                  |
| 43C1.00 | READ           | Blood sent for HTLV-3 serology                               | Definite                  |
| 43C2.00 | READ           | HTLV-3 antibody negative                                     | Definite                  |
| 43C2.11 | READ           | HIV negative                                                 | Definite                  |
| 43CZ.00 | READ           | HTLV-3 antibody NOS                                          | Definite                  |
| 43d5.00 | READ           | HIV antibody/antigen (Duo)                                   | Definite                  |
| 43d6.00 | READ           | HTLV 1 antibody level                                        | Ambiguous                 |
| 43dc.00 | READ           | HTLV 2 antibody level                                        | Ambiguous                 |
| 43h2.00 | READ           | HIV 1 PCR                                                    | Definite                  |
| 43j7.00 | READ           | HIV 1 nucleic acid detection                                 | Definite                  |
| 43V1.00 | READ           | Absolute CD4 count                                           | Definite                  |
| 43VE.00 | READ           | CD4/CD8 ratio                                                | Definite                  |
| 43VH.00 | READ           | Percentage CD4 count                                         | Definite                  |
| 43Vo.00 | READ           | Absolute CD4 (T4 cells) count                                | Definite                  |
| 43Vp.00 | READ           | Percentage CD4 (T4 cells) count                              | Definite                  |
| 43W7.00 | READ           | HIV1 antibody level                                          | Definite                  |
| 43W8.00 | READ           | HIV2 antibody level                                          | Definite                  |
| 43WK.00 | READ           | Human immunodeficiency virus antibody level                  | Definite                  |
| 4J34.00 | READ           | HIV viral load                                               | Definite                  |
| 4J35.00 | READ           | HIV p24 antigen level                                        | Definite                  |
| 4JDT.00 | READ           | HIV serology                                                 | Definite                  |
| 4JR7.00 | READ           | HIV screening test                                           | Definite                  |
| 62b..00 | READ           | Antenatal HIV screening                                      | Definite                  |
| 6827.00 | READ           | AIDS (HTLV-III) screening                                    | Definite                  |
| R109.00 | READ           | [D]Laboratory evidence of human immunodeficiency virus [HIV] | Definite                  |
| ZV01800 | READ           | [V]Human immunodeficiency virus - negative                   | Definite                  |
| ZV73700 | READ           | [V]Special screening exam for human immunodeficiency virus   | Definite                  |
| L1111PV | OXMIS          | HIV ANTIBODY TEST POSITIVE                                   | Definite                  |
| L 153P  | OXMIS          | HTVL-AIDS-III ANTIBODY TEST POSITIVE                         | Definite                  |
| L 153   | OXMIS          | HTVL-AIDS-III ANTIBODY TEST                                  | Definite                  |
| L1111NE | OXMIS          | HIV ANTIBODY TEST NEGATIVE                                   | Definite                  |
| L 153N  | OXMIS          | HTVL-AIDS-III ANTIBODY TEST NEGATIVE                         | Definite                  |
| 65VE.00 | READ           | Notification of AIDS                                         | Ambiguous                 |
| 43j8.00 | READ           | HTLV 1 nucleic acid detection                                | Ambiguous                 |

**Appendix 2: Read & OXMIS codes denoting HIV positive status used to identify HIV positive patients who have their HIV positive status recorded in primary care (Evans *et al* 2009<sup>26</sup>).**

| Code    | Read/OXMIS | Code description                                              | Certainty of HIV+ status |
|---------|------------|---------------------------------------------------------------|--------------------------|
| 65QA.00 | READ       | AIDS carrier                                                  | Definite                 |
| A789700 | READ       | HIV disease resulting other types of non-Hodgkin's lymphoma   | Definite                 |
| A789800 | READ       | HIV disease resulting in multiple malignant neoplasms         | Definite                 |
| A788.00 | READ       | Acquired immune deficiency syndrome                           | Definite                 |
| A788500 | READ       | Human immunodeficiency virus with secondary infection         | Definite                 |
| A788X00 | READ       | HIV disease resulting/unspcf infectious+parasitic disease     | Definite                 |
| A789200 | READ       | HIV disease resulting in candidiasis                          | Definite                 |
| A789500 | READ       | HIV disease resulting in Kaposi's sarcoma                     | Definite                 |
| AyuC100 | READ       | [X]HIV disease resulting in other viral infections            | Definite                 |
| AyuC700 | READ       | [X]HIV dis reslt/oth mal neopl/lymph,h'matopoetc+reltd tissu  | Definite                 |
| A788000 | READ       | Acute human immunodeficiency virus infection                  | Definite                 |
| A788100 | READ       | Asymptomatic human immunodeficiency virus infection           | Definite                 |
| A789300 | READ       | HIV disease resulting in Pneumocystis carinii pneumonia       | Definite                 |
| A789600 | READ       | HIV disease resulting in Burkitt's lymphoma                   | Definite                 |
| A798.00 | READ       | Retrovirus infection                                          | Definite                 |
| AyuC200 | READ       | [X]HIV disease resulting in other mycoses                     | Definite                 |
| AyuCA00 | READ       | [X]HIV disease resulting in multiple diseases CE              | Definite                 |
| A788U00 | READ       | HIV disease result/haematological+immunologic abnorms,NEC     | Definite                 |
| A789.00 | READ       | Human immunodef virus resulting in other disease              | Definite                 |
| AyuC000 | READ       | [X]HIV disease resulting in other bacterial infections        | Definite                 |
| AyuC800 | READ       | [X]HIV disease resulting in other malignant neoplasms         | Definite                 |
| 43C3.11 | READ       | HIV positive                                                  | Definite                 |
| A788y00 | READ       | Human immunodeficiency virus with other clinical findings     | Definite                 |
| Eu02400 | READ       | [X]Dementia in human immunodef virus [HIV] disease            | Definite                 |
| ZV01A00 | READ       | [V]Asymptomatic human immunodeficiency virus infection status | Definite                 |
| A789400 | READ       | HIV disease resulting in multiple infections                  | Definite                 |
| AyuC500 | READ       | [X]HIV disease resulting/unspcf infectious+parasitic disease  | Definite                 |
| AyuC900 | READ       | [X]HIV disease resulting in unspecified malignant neoplasm    | Definite                 |
| AyuCC00 | READ       | [X]HIV disease resulting in other specified conditions        | Definite                 |
| 43C3.00 | READ       | HTLV-3 antibody positive                                      | Definite                 |
| A788W00 | READ       | HIV disease resulting in unspecified malignant neoplasm       | Definite                 |
| A789X00 | READ       | HIV dis reslt/oth mal neopl/lymph,h'matopoetc+                | Definite                 |
| AyuC300 | READ       | [X]HIV disease resulting in multiple infections               | Definite                 |
| AyuC400 | READ       | [X]HIV disease resulting/other infectious+parasitic diseases  | Definite                 |
| AyuC600 | READ       | [X]HIV disease resulting in other non-Hodgkin's lymphoma      | Definite                 |
| A788600 | READ       | Human immunodeficiency virus with secondary cancers           | Definite                 |
| A788z00 | READ       | Acquired human immunodeficiency virus infection syndrome NOS  | Definite                 |
| A789A00 | READ       | HIV disease resulting in wasting syndrome                     | Definite                 |
| 65VE.00 | READ       | Notification of AIDS                                          | Definite                 |
| A788.11 | READ       | Human immunodeficiency virus infection                        | Definite                 |
| A788200 | READ       | HIV infection with persistent generalised lymphadenopathy     | Definite                 |
| A788300 | READ       | Human immunodeficiency virus with constitutional disease      | Definite                 |
| A788400 | READ       | Human immunodeficiency virus with neurological disease        | Definite                 |



**Appendix 2 (CONT'D): Read & OXMIS codes denoting HIV positive status used to identify HIV positive patients who have their HIV positive status recorded in primary care.**

| Code    | Read/OXMIS | Code description                                              | Certainty of HIV+ status |
|---------|------------|---------------------------------------------------------------|--------------------------|
| A788V00 | READ       | HIV disease resulting in multiple diseases CE                 | Definite                 |
| A789100 | READ       | HIV disease resulting in cytomegaloviral disease              | Definite                 |
| AyuC.00 | READ       | [X]Human immunodeficiency virus disease                       | Definite                 |
| AyuCD00 | READ       | [X]Unspecified human immunodeficiency virus [HIV] disease     | Definite                 |
| A789000 | READ       | HIV disease resulting in mycobacterial infection              | Definite                 |
| A789900 | READ       | HIV disease resulting in lymphoid interstitial pneumonitis    | Definite                 |
| AyuCB00 | READ       | [X]HIV disease result/haematological+immunologic abnorms,NEC  | Definite                 |
| R109.00 | READ       | [D]Laboratory evidence of human immunodeficiency virus [HIV]  | Definite                 |
| ZV01A00 | READ       | [V]Asymptomatic human immunodeficiency virus infection status | Definite                 |
| 799MD   | OXMIS      | AIDS                                                          | Definite                 |
| 799CA   | OXMIS      | AIDS CARRIER                                                  | Definite                 |
| L1111PV | OXMIS      | HIV ANTIBODY TEST POSITIVE                                    | Definite                 |
| L7990A  | OXMIS      | ACQUIRED IMMUNE DEFICIENCY SYNDROME                           | Definite                 |
| L 153P  | OXMIS      | HTVL-AIDS-III ANTIBODY TEST POSITIVE                          | Definite                 |
| 43V1.00 | READ       | Absolute CD4 count                                            | Ambiguous                |
| AyuD800 | READ       | [X]Retrovirus infections, not elsewhere classified            | Ambiguous                |
| AyuKM00 | READ       | [X]Retrovirus/cause of diseases classified to other chapters  | Ambiguous                |
| 43VE.00 | READ       | CD4/CD8 ratio                                                 | Ambiguous                |
| A7y0100 | READ       | Retrovirus as cause of diseases classified to other chapters  | Ambiguous                |
| 43VH.00 | READ       | Percentage CD4 count                                          | Ambiguous                |
| 4J34.00 | READ       | HIV viral load                                                | Ambiguous                |
| 4J35.00 | READ       | HIV p24 antigen level                                         | Ambiguous                |
| 43h2.00 | READ       | HIV 1 PCR                                                     | Ambiguous                |
| 43j7.00 | READ       | HIV 1 nucleic acid detection                                  | Ambiguous                |
| 43Vo.00 | READ       | Absolute CD4 (T4 cells) count                                 | Ambiguous                |
| 43Vp.00 | READ       | Percentage CD4 (T4 cells) count                               | Ambiguous                |

**Appendix 3: Pregnancy/Delivery/Abortion medcodes (Jackson *et al*<sup>50</sup>)**

| medcode | readcode | readterm                                   |
|---------|----------|--------------------------------------------|
| 52685   | ZV23000  | [V]Pregnancy with history of infertility   |
| 3030    | 4654     | Urine pregnancy test positive              |
| 73535   | L13z100  | Unspecified pregnancy vomiting - delivered |
| 53514   | Z22D300  | Uncertain viability of pregnancy           |
| 11422   | Z226.00  | Pregnancy problem                          |
| 20623   | ZV4J000  | [V]Problems related to unwanted pregnancy  |
| 99247   | L13y200  | Other pregnancy vomiting - not delivered   |
| 56451   | L13zz00  | Unspecified pregnancy vomiting NOS         |
| 14644   | L166z11  | UTI - urinary tract infection in pregnancy |
| 32975   | 6166     | Pregnant, diaphragm failure                |

|    |        |         |                                                              |
|----|--------|---------|--------------------------------------------------------------|
| 1  |        |         |                                                              |
| 2  |        |         |                                                              |
| 3  |        |         |                                                              |
| 4  | 23495  | L265.00 | Small-for-dates fetus in pregnancy                           |
| 5  | 3766   | L10..00 | Haemorrhage in early pregnancy                               |
| 6  | 56953  | Z235400 | Pendulous pregnant abdomen                                   |
| 7  | 40279  | 7E19012 | Fimbrial extraction of tubal pregnancy                       |
| 8  | 29122  | 7E19011 | Removal of ectopic pregnancy from fallopian tube             |
| 9  | 1748   | 7E08400 | Suction termination of pregnancy                             |
| 10 | 106170 | L21zz00 | Multiple pregnancy NOS                                       |
| 11 | 5357   | 7E08500 | Dilation of cervix and extraction termination of pregnancy   |
| 12 | 14899  | 621Z.00 | Patient pregnant NOS                                         |
| 13 | 61563  | L161300 | Oedema or excessive weight gain in pregnancy - not delivered |
| 14 | 64523  | L091z00 | Delayed/excess haemorrhage NOS following abortive pregnancy  |
| 15 | 20621  | ZV25313 | [V]Admission for termination of pregnancy                    |
| 16 | 20910  | ZV25311 | [V]Admission for termination of pregnancy (TOP)              |
| 17 | 70149  | L16A100 | Glycosuria during pregnancy - delivered                      |
| 18 | 54677  | L167200 | Liver disorder in pregnancy - not delivered                  |
| 19 | 102576 | L051711 | Incomplete termination of pregnancy                          |
| 20 | 36903  | 67AZ.00 | Pregnancy advice NOS                                         |
| 21 | 46448  | Q486.00 | Fetal death due to termination of pregnancy                  |
| 22 | 109697 | 6556    | Pertussis vaccination in pregnancy                           |
| 23 | 85961  | 44Cy.00 | Serum pregnancy associated plasma protein-A MoM measurement  |
| 24 | 20307  | L091.00 | Delayed/excessive haemorrhage following abortive pregnancy   |
| 25 | 37163  | L150z00 | Post-term pregnancy NOS                                      |
| 26 | 94473  | L211z00 | Triplet pregnancy NOS                                        |
| 27 | 47489  | Z22A800 | Undiagnosed pregnancy                                        |
| 28 | 1668   | L182500 | Iron deficiency anaemia of pregnancy                         |
| 29 | 61576  | L211000 | Triplet pregnancy unspecified                                |
| 30 | 25501  | Z22A100 | Low risk pregnancy                                           |
| 31 | 40633  | Z22A600 | Teenage pregnancy                                            |
| 32 | 104440 | 4Q3N.00 | Pregnancy associated plasma protein A level                  |
| 33 | 45413  | L263A11 | Maternal care for reduced fetal heart rate during pregnancy  |
| 34 | 14994  | 6174    | Pregnant, sheath failure                                     |
| 35 | 24170  | L15..00 | Prolonged or post-term pregnancy                             |
| 36 | 66390  | Q0z..00 | Maternal problem unrelated preg affecting fetus/neonate NOS  |
| 37 | 27833  | L13y.00 | Other pregnancy vomiting                                     |
| 38 | 55338  | L123000 | Transient hypertension of pregnancy unspecified              |
| 39 | 99956  | L168400 | Fatigue during pregnancy with postnatal complication         |
| 40 | 71314  | L093.00 | Renal failure following abortive pregnancy                   |
| 41 | 106735 | 9mK0.00 | Pertussis vaccination in pregnancy invitation first letter   |
| 42 | 31449  | 6294    | No A/N care: not known preg.                                 |
| 43 | 100670 | L181100 | Thyroid dysfunction during pregnancy - baby delivered        |
| 44 | 54866  | L030.00 | Abdominal pregnancy                                          |
| 45 | 38882  | L123600 | Transient hypertension of pregnancy                          |
| 46 | 61995  | L03yz00 | Other ectopic pregnancy NOS                                  |
| 47 | 5044   | 13H7.00 | Unwanted pregnancy                                           |
| 48 | 25131  | Z22AD11 | Reported conception - pregnancy                              |
| 49 |        |         |                                                              |
| 50 |        |         |                                                              |
| 51 |        |         |                                                              |
| 52 |        |         |                                                              |
| 53 |        |         |                                                              |
| 54 |        |         |                                                              |
| 55 |        |         |                                                              |
| 56 |        |         |                                                              |
| 57 |        |         |                                                              |
| 58 |        |         |                                                              |
| 59 |        |         |                                                              |
| 60 |        |         |                                                              |

|    |        |         |                                                              |
|----|--------|---------|--------------------------------------------------------------|
| 1  |        |         |                                                              |
| 2  |        |         |                                                              |
| 3  |        |         |                                                              |
| 4  | 21467  | L03y200 | Membranous pregnancy                                         |
| 5  | 48304  | L10z200 | Early pregnancy haemorrhage NOS - not delivered              |
| 6  | 37693  | 13Hd.00 | Teenage pregnancy                                            |
| 7  | 27980  | L166700 | Infections of the genital tract in pregnancy                 |
| 8  | 2638   | L1...00 | Pregnancy complications                                      |
| 9  | 99933  | L092100 | Bowel damage following abortive pregnancy                    |
| 10 | 41122  | L10zz00 | Early pregnancy haemorrhage NOS                              |
| 11 | 37348  | Lyu2500 | [X]Other specified pregnancy-related conditions              |
| 12 | 96757  | L411513 | Vulval varices in pregnancy                                  |
| 13 | 59634  | L411512 | Vaginal varices in pregnancy                                 |
| 14 | 99237  | L411511 | Perineal varices in pregnancy                                |
| 15 | 27451  | L166000 | Genitourinary tract infection in pregnancy unspecified       |
| 16 | 110129 | 6556000 | Pertussis vacc in pregnancy given by other healthcre providr |
| 17 | 107485 | Q014000 | Fetus or neonate affected by unspecified ectopic pregnancy   |
| 18 | 18258  | L167.00 | Liver disorder in pregnancy                                  |
| 19 | 42015  | L16y.00 | Other pregnancy complications                                |
| 20 | 25028  | L09z.00 | Complication NOS following abortion/ectopic/molar pregnancy  |
| 21 | 44734  | 62O8.00 | Pregnancy prolonged - 42 weeks                               |
| 22 | 23831  | ZV22y00 | [V]Other specified pregnant state                            |
| 23 | 41587  | L210z00 | Twin pregnancy NOS                                           |
| 24 | 24063  | 62O7.00 | Pregnancy prolonged - 41 weeks                               |
| 25 | 44650  | L0y..00 | Other specified pregnancy with abortive outcome              |
| 26 | 61284  | L210200 | Twin pregnancy with antenatal problem                        |
| 27 | 54288  | Z22D311 | Query viability of pregnancy                                 |
| 28 | 34938  | L212.00 | Quadruplet pregnancy                                         |
| 29 | 102494 | 8Hh3.00 | Self referral to termination of pregnancy service            |
| 30 | 1686   | 7E08600 | Termination of pregnancy NEC                                 |
| 31 | 70214  | L21z100 | Multiple pregnancy NOS - delivered                           |
| 32 | 64247  | Z235.00 | Observation of shape of pregnant abdomen                     |
| 33 | 23751  | L266.00 | Large-for-dates fetus in pregnancy                           |
| 34 | 39359  | L385.00 | Failed or difficult intubation during pregnancy              |
| 35 | 64500  | L183.11 | Pregnancy and drug dependence                                |
| 36 | 73917  | L10y200 | Other haemorrhage in early pregnancy - not delivered         |
| 37 | 255    | L05..12 | Termination of pregnancy                                     |
| 38 | 15433  | L21..00 | Multiple pregnancy                                           |
| 39 | 20439  | L123.00 | Transient hypertension of pregnancy                          |
| 40 | 16775  | L16E.00 | Pregnancy pruritus                                           |
| 41 | 53921  | L161000 | Oedema or excessive weight gain in pregnancy, unspecified    |
| 42 | 44770  | L191.00 | Continuing pregnancy after abortion of one fetus or more     |
| 43 | 29205  | 4453    | Serum pregnancy test positive                                |
| 44 | 46577  | 66AX.00 | Diabetes: shared care in pregnancy - diabetol and obstet     |
| 45 | 73455  | Q015200 | Fetus or neonate affected by triplet pregnancy               |
| 46 | 41625  | L13yz00 | Other pregnancy vomiting NOS                                 |
| 47 | 60345  | M240500 | Alopecia of pregnancy                                        |
| 48 | 107957 | 115V.00 | No history of ectopic pregnancy                              |
| 49 |        |         |                                                              |
| 50 |        |         |                                                              |
| 51 |        |         |                                                              |
| 52 |        |         |                                                              |
| 53 |        |         |                                                              |
| 54 |        |         |                                                              |
| 55 |        |         |                                                              |
| 56 |        |         |                                                              |
| 57 |        |         |                                                              |
| 58 |        |         |                                                              |
| 59 |        |         |                                                              |
| 60 |        |         |                                                              |

|    |        |         |                                                              |
|----|--------|---------|--------------------------------------------------------------|
| 1  |        |         |                                                              |
| 2  |        |         |                                                              |
| 3  | 6580   | ZV23800 | [V]Supervision of high-risk pregnancy due to social problems |
| 4  | 61182  | L211100 | Triplet pregnancy - delivered                                |
| 5  | 30365  | Z22AA00 | Wanted pregnancy                                             |
| 6  | 26852  | ZV23400 | [V]Pregnancy with other poor obstetric history               |
| 7  | 30817  | 6212    | Pregnant - blood test confirms                               |
| 8  | 72014  | L212z00 | Quadruplet pregnancy NOS                                     |
| 9  | 12521  | L161.11 | Excessive weight gain in pregnancy                           |
| 10 | 41959  | L171300 | Maternal gonorrhoea in pregnancy - baby not yet delivered    |
| 11 | 26201  | Z22AC00 | Pregnancy with uncertain dates                               |
| 12 | 49519  | Z229.00 | Observation of position of pregnancy                         |
| 13 | 107713 | L21y200 | Other multiple pregnancy with antenatal problem              |
| 14 | 36235  | 67A4.00 | Pregnancy exercise advice                                    |
| 15 | 105511 | L21z.00 | Multiple pregnancy NOS                                       |
| 16 | 65783  | L030000 | Delivery of viable fetus in abdominal pregnancy              |
| 17 | 106267 | L03y300 | Combined or heterotopic pregnancy                            |
| 18 | 2278   | 8M6..00 | Requests pregnancy termination                               |
| 19 | 110448 | Lyu0.00 | [X]Pregnancy with abortive outcome                           |
| 20 | 99006  | Q014100 | Fetus or neonate affected by abdominal ectopic pregnancy     |
| 21 | 40357  | L2D..00 | Retained intrauterine contraceptive device in pregnancy      |
| 22 | 54293  | Q015.00 | Fetus or neonate affected by multiple pregnancy              |
| 23 | 22557  | Z22B100 | Single pregnancy                                             |
| 24 | 15338  | 621A.00 | Pregnancy unplanned ? wanted                                 |
| 25 | 6649   | L166800 | Urinary tract infection complicating pregnancy               |
| 26 | 49855  | Q015100 | Fetus or neonate affected by twin pregnancy                  |
| 27 | 40825  | Z22B800 | Undiagnosed multiple pregnancy                               |
| 28 | 35509  | 624..00 | A/N care: precious pregnancy                                 |
| 29 | 20197  | L211.00 | Triplet pregnancy                                            |
| 30 | 46270  | ZV22z00 | [V]Unspecified pregnant state                                |
| 31 | 67098  | L183300 | Drug dependence during pregnancy - baby not yet delivered    |
| 32 | 23373  | L150.00 | Post-term pregnancy                                          |
| 33 | 1357   | L210100 | Twin pregnancy - delivered                                   |
| 34 | 45729  | Z22D.00 | Observation of viability of pregnancy                        |
| 35 | 44733  | L0z..00 | Pregnancy with abortive outcome NOS                          |
| 36 | 11760  | L13z.00 | Unspecified pregnancy vomiting                               |
| 37 | 18500  | Z22D100 | Viable pregnancy                                             |
| 38 | 69686  | L417000 | Cerebral venous thrombosis in pregnancy                      |
| 39 | 53661  | L13z200 | Unspecified pregnancy vomiting - not delivered               |
| 40 | 22183  | 957..11 | Prescription exempt form-preg                                |
| 41 | 106378 | 9mK..00 | Pertussis vaccination in pregnancy invitation                |
| 42 | 12230  | L263900 | Maternal care for fetal tachycardia during pregnancy         |
| 43 | 22193  | Z229100 | Intrauterine pregnancy                                       |
| 44 | 15061  | L13..12 | Hyperemesis of pregnancy                                     |
| 45 | 14877  | 621B.00 | Pregnant - ? planned                                         |
| 46 | 27672  | 7E13100 | Excision of ectopic ovarian pregnancy                        |
| 47 | 1744   | L03..00 | Ectopic pregnancy                                            |
| 48 |        |         |                                                              |
| 49 |        |         |                                                              |
| 50 |        |         |                                                              |
| 51 |        |         |                                                              |
| 52 |        |         |                                                              |
| 53 |        |         |                                                              |
| 54 |        |         |                                                              |
| 55 |        |         |                                                              |
| 56 |        |         |                                                              |
| 57 |        |         |                                                              |
| 58 |        |         |                                                              |
| 59 |        |         |                                                              |
| 60 |        |         |                                                              |

|    |        |         |                                                              |
|----|--------|---------|--------------------------------------------------------------|
| 1  |        |         |                                                              |
| 2  |        |         |                                                              |
| 3  | 5693   | L16A.00 | Glycosuria during pregnancy                                  |
| 4  | 36394  | L16C.00 | Pregnancy induced oedema+proteinuria without hypertension    |
| 5  | 73914  | L412511 | Thrombophlebitis of legs in pregnancy                        |
| 6  | 53849  | L16y000 | Other pregnancy complication unspecified                     |
| 7  |        |         |                                                              |
| 8  | 105943 | L165300 | Asymptomatic bacteriuria in pregnancy - not delivered        |
| 9  | 36421  | L167z00 | Liver disorder in pregnancy NOS                              |
| 10 | 25872  | L16yz00 | Other pregnancy complication NOS                             |
| 11 | 60309  | Q0y..00 | Maternal problems unrelated preg affecting fetus/neonate OS  |
| 12 | 67728  | L150200 | Post-term pregnancy - not delivered                          |
| 13 | 28103  | Z22A300 | Concealed pregnancy                                          |
| 14 | 21849  | L031.00 | Tubal pregnancy                                              |
| 15 | 54577  | L210000 | Twin pregnancy unspecified                                   |
| 16 | 105654 | L10y100 | Other haemorrhage in early pregnancy - delivered             |
| 17 | 53685  | L410500 | Varicose veins of legs in pregnancy                          |
| 18 | 68930  | L168100 | Fatigue during pregnancy - delivered                         |
| 19 | 68840  | L416200 | Haemorrhoids in pregnancy and puerperium - deliv + p/n comp  |
| 20 | 53167  | L188300 | Abnormal GTT during pregnancy - baby not yet delivered       |
| 21 | 45862  | 7E07114 | Curettage of uterus for termination of pregnancy NEC         |
| 22 | 64366  | L412500 | Superficial thrombophlebitis in pregnancy                    |
| 23 | 13968  | 584D.00 | Antenatal ultrasound confirms intra-uterine pregnancy        |
| 24 | 14925  | L10z.00 | Early pregnancy haemorrhage NOS                              |
| 25 | 61935  | L185.11 | Congenital heart disease in pregnancy                        |
| 26 | 103059 | 7E07111 | Curettage of term pregnancy NEC                              |
| 27 | 16384  | 7E07113 | Curettage of uterus for termination of pregnancy NEC         |
| 28 | 23421  | 615C.00 | IUD failure - pregnant                                       |
| 29 | 3029   | L166500 | Infections of kidney in pregnancy                            |
| 30 | 106517 | L176100 | Other maternal viral disease in pregnancy - baby delivered   |
| 31 | 40964  | L192.00 | Continuing preg after intrauterine death one fetus or more   |
| 32 | 1850   | 7F06012 | Shirodkar suture in pregnancy                                |
| 33 | 30302  | 7F...12 | Pregnancy operations                                         |
| 34 | 28107  | L161.00 | Oedema or excessive weight gain in pregnancy no hypertension |
| 35 | 85960  | 44Cz.00 | Plasma pregnancy associated plasma protein-A MoM             |
| 36 | 44057  | ZV23111 | [V]Pregnancy with history of hydatidiform mole               |
| 37 | 37573  | Z22B900 | Continuing pregnancy after abortion of sibling fetus         |
| 38 | 68694  | Z22C.00 | Observation of measures of pregnancy                         |
| 39 | 49559  | L180300 | Diabetes mellitus during pregnancy - baby not yet delivered  |
| 40 | 29786  | L416600 | Haemorrhoids in pregnancy                                    |
| 41 | 57059  | L187300 | Orthopaedic disorder in pregnancy - baby not yet delivered   |
| 42 | 23334  | L162.11 | Albuminuria in pregnancy without hypertension                |
| 43 | 92579  | L162.13 | Uraemia in pregnancy without hypertension                    |
| 44 | 38312  | L162.12 | Nephropathy NOS in pregnancy without hypertension            |
| 45 | 22215  | Z22A200 | High risk pregnancy                                          |
| 46 | 38346  | ZV22000 | [V]First normal pregnancy supervision                        |
| 47 | 15318  | 6214    | Pregnant - on history                                        |
| 48 | 41504  | L13y000 | Other pregnancy vomiting unspecified                         |
| 49 |        |         |                                                              |
| 50 |        |         |                                                              |
| 51 |        |         |                                                              |
| 52 |        |         |                                                              |
| 53 |        |         |                                                              |
| 54 |        |         |                                                              |
| 55 |        |         |                                                              |
| 56 |        |         |                                                              |
| 57 |        |         |                                                              |
| 58 |        |         |                                                              |
| 59 |        |         |                                                              |
| 60 |        |         |                                                              |

|    |        |         |                                                              |
|----|--------|---------|--------------------------------------------------------------|
| 1  |        |         |                                                              |
| 2  |        |         |                                                              |
| 3  |        |         |                                                              |
| 4  | 72019  | L132200 | Late pregnancy vomiting - not delivered                      |
| 5  | 37386  | 8B68.00 | Pregnancy prophylactic therapy                               |
| 6  | 60877  | L263800 | Maternal care for fetal decelerations during pregnancy       |
| 7  | 107225 | L165z00 | Asymptomatic bacteriuria in pregnancy NOS                    |
| 8  | 54942  | L123100 | Transient hypertension of pregnancy - delivered              |
| 9  | 54701  | ZV23y00 | [V]Other specified high-risk pregnancy                       |
| 10 | 63825  | Q014.00 | Fetus or neonate affected by ectopic pregnancy               |
| 11 | 94804  | 67AB.00 | Preg. prescription exempt adv.                               |
| 12 | 72835  | Q01z.00 | Fetus/neonate affected by maternal complic pregnancy NOS     |
| 13 | 99008  | Q014300 | Fetus or neonate affected by tubal ectopic pregnancy         |
| 14 | 110868 | L181000 | Thyroid dysfunction - unspec whether in pregnancy/puerperium |
| 15 | 66649  | L41z500 | Venous complication of pregnancy, unspecified                |
| 16 | 26286  | L18A000 | Cholestasis of pregnancy                                     |
| 17 | 17947  | 62a..00 | Pregnancy review                                             |
| 18 | 103104 | L176300 | Other maternal viral dis.in pregnancy-baby not yet delivered |
| 19 | 109932 | Z235211 | Globular pregnant abdomen                                    |
| 20 | 68004  | Q01..00 | Fetus/neonate affected by maternal complication of pregnancy |
| 21 | 20240  | 6216    | Pregnant - planned                                           |
| 22 | 65834  | ZV23200 | [V]Pregnancy with history of abortion                        |
| 23 | 7916   | Z254500 | Delivered by caesarean section - pregnancy at term           |
| 24 | 21119  | L182300 | Anaemia during pregnancy - baby not yet delivered            |
| 25 | 9408   | L10y.11 | Bleeding in early pregnancy                                  |
| 26 | 64099  | L168000 | Fatigue during pregnancy unspecified                         |
| 27 | 10278  | L180800 | Diabetes mellitus arising in pregnancy                       |
| 28 | 2602   | L166.11 | Cystitis of pregnancy                                        |
| 29 | 13165  | 621..00 | Patient currently pregnant                                   |
| 30 | 9986   | Z212.11 | Pregnancy care                                               |
| 31 | 66594  | L186.11 | Heart disease during pregnancy                               |
| 32 | 35158  | Z225.00 | Normal pregnancy                                             |
| 33 | 93800  | Z235100 | Ovoid pregnant abdomen                                       |
| 34 | 73727  | L168z00 | Fatigue during pregnancy NOS                                 |
| 35 | 55889  | L175300 | Maternal rubella during pregnancy - baby not yet delivered   |
| 36 | 7517   | 621C.00 | Unplanned pregnancy                                          |
| 37 | 53908  | Lyu0000 | [X]Other ectopic pregnancy                                   |
| 38 | 34173  | L12B.00 | Proteinuric hypertension of pregnancy                        |
| 39 | 35514  | 624Z.00 | A/N care: precious preg. NOS                                 |
| 40 | 15065  | 8B7..11 | Pregnancy vitamin/iron prophyl                               |
| 41 | 109465 | L184300 | Mental disorder during pregnancy - baby not yet delivered    |
| 42 | 24038  | 13S..00 | Pregnancy benefits                                           |
| 43 | 16215  | 6211    | Pregnant - urine test confirms                               |
| 44 | 35592  | 6213    | Pregnant - V.E. confirms                                     |
| 45 | 25254  | Z21..00 | Care relating to reproduction and pregnancy                  |
| 46 | 46609  | Z22C800 | Number of lost pregnancies                                   |
| 47 | 29692  | 615C.11 | Pregnant, IUD failure                                        |
| 48 | 50440  | Z22A500 | Biochemical pregnancy                                        |
| 49 |        |         |                                                              |
| 50 |        |         |                                                              |
| 51 |        |         |                                                              |
| 52 |        |         |                                                              |
| 53 |        |         |                                                              |
| 54 |        |         |                                                              |
| 55 |        |         |                                                              |
| 56 |        |         |                                                              |
| 57 |        |         |                                                              |
| 58 |        |         |                                                              |
| 59 |        |         |                                                              |
| 60 |        |         |                                                              |

|    |        |         |                                                       |
|----|--------|---------|-------------------------------------------------------|
| 1  |        |         |                                                       |
| 2  |        |         |                                                       |
| 3  |        |         |                                                       |
| 4  | 56252  | ZV22100 | [V]Other normal pregnancy supervision                 |
| 5  | 21196  | ZV23.00 | [V]High-risk pregnancy supervision                    |
| 6  | 30618  | Z22AB00 | Unplanned pregnancy                                   |
| 7  | 10775  | 8B74.00 | Iron supplement in pregnancy                          |
| 8  |        |         |                                                       |
| 9  | 48534  | ZV23100 | [V]Pregnancy with history of trophoblastic disease    |
| 10 | 73559  | L13z000 | Unspecified pregnancy vomiting unspecified            |
| 11 | 13984  | 584E.00 | Antenatal ultrasound confirms ectopic pregnancy       |
| 12 | 9754   | Z22A400 | Early stage of pregnancy                              |
| 13 | 67893  | L2C..00 | Malnutrition in pregnancy                             |
| 14 | 70993  | L16Az00 | Glycosuria during pregnancy NOS                       |
| 15 | 23438  | L2z..00 | Risk factors in pregnancy NOS                         |
| 16 |        |         |                                                       |
| 17 | 105694 | ZVu2300 | [X]Supervision of other normal pregnancy              |
| 18 | 53097  | Z22C313 | Duration of pregnancy                                 |
| 19 | 58156  | L03y.00 | Other ectopic pregnancy                               |
| 20 | 55730  | ZV22.11 | [V]Supervision of normal pregnancy                    |
| 21 | 5709   | 62...13 | Pregnancy care                                        |
| 22 |        |         |                                                       |
| 23 | 100104 | 95B..00 | Health in Pregnancy grant claim form issued           |
| 24 | 72883  | Lyu2100 | [X]Other vomiting complicating pregnancy              |
| 25 | 59588  | L411500 | Genital varices in pregnancy                          |
| 26 | 67863  | Z22B.00 | Observation of quantity of pregnancy                  |
| 27 | 12890  | Z227.00 | Confirmation of pregnancy                             |
| 28 | 47080  | L162.00 | Unspecified renal disease in pregnancy                |
| 29 | 3191   | L16y500 | Abdominal pain in pregnancy                           |
| 30 | 27740  | L16..00 | Other pregnancy complication NEC                      |
| 31 | 67698  | L150000 | Post-term pregnancy unspecified                       |
| 32 | 29623  | 62H4.00 | Rh screen - 2nd preg. sample                          |
| 33 | 21438  | 7E08411 | Vacuum termination of pregnancy                       |
| 34 | 51298  | 6215    | Pregnant - on abdom. palpation                        |
| 35 | 35912  | ZV22200 | [V]Pregnancy confirmed                                |
| 36 | 99980  | L168300 | Fatigue during pregnancy - not delivered              |
| 37 | 29593  | 6223    | Antenatal care: 3rd pregnancy                         |
| 38 | 49407  | L2B..00 | Low weight gain in pregnancy                          |
| 39 | 52583  | L168.00 | Fatigue during pregnancy                              |
| 40 | 69599  | L21y.00 | Other multiple pregnancy                              |
| 41 | 39117  | L126500 | Eclampsia in pregnancy                                |
| 42 | 863    | L398200 | Caesarean section - pregnancy at term                 |
| 43 | 90776  | 62a..11 | Review of pregnancy                                   |
| 44 | 91254  | Z235200 | Rounded pregnant abdomen                              |
| 45 | 109416 | 62H5.00 | Rh screen - 3rd preg. sample                          |
| 46 | 69815  | 62H3.00 | Rh screen - 1st preg. sample                          |
| 47 | 11989  | 8HHV.00 | Referral for termination of pregnancy                 |
| 48 | 37701  | Z22A.00 | Observation of pattern of pregnancy                   |
| 49 | 33441  | L511.00 | Maternal care for viable fetus in abdominal pregnancy |
| 50 | 106957 | 9Nif.00 | Did not attend pertussis vaccination in pregnancy     |
| 51 | 24603  | L10y.00 | Other haemorrhage in early pregnancy                  |
| 52 |        |         |                                                       |
| 53 |        |         |                                                       |
| 54 |        |         |                                                       |
| 55 |        |         |                                                       |
| 56 |        |         |                                                       |
| 57 |        |         |                                                       |
| 58 |        |         |                                                       |
| 59 |        |         |                                                       |
| 60 |        |         |                                                       |

|    |        |         |                                                             |
|----|--------|---------|-------------------------------------------------------------|
| 1  |        |         |                                                             |
| 2  |        |         |                                                             |
| 3  |        |         |                                                             |
| 4  | 47608  | L177.00 | Infections of bladder in pregnancy                          |
| 5  | 63751  | L16A300 | Glycosuria during pregnancy - not delivered                 |
| 6  | 15418  | L166300 | Genitourinary tract infection in pregnancy - not delivered  |
| 7  | 59313  | Z22BA00 | Contin pregnancy after intrauterine death of sibling fetus  |
| 8  | 69722  | ZV23z00 | [V]Unspecified high-risk pregnancy                          |
| 9  | 14842  | 6217    | Pregnant - unplanned - wanted                               |
| 10 | 42614  | Z22..00 | Pregnancy observations                                      |
| 11 | 53490  | L178.00 | Infections of urethra in pregnancy                          |
| 12 | 43344  | ZV61800 | [V]Illegitimate pregnancy                                   |
| 13 | 10173  | Z23D200 | Pregnant abdomen observation                                |
| 14 | 52685  | ZV23000 | [V]Pregnancy with history of infertility                    |
| 15 | 50512  | L031z00 | Tubal pregnancy NOS                                         |
| 16 | 49502  | L228.00 | Multiple pregnancy with malpresentation                     |
| 17 | 50058  | 13SZ.00 | Pregnancy benefit NOS                                       |
| 18 | 69011  | L132000 | Late pregnancy vomiting unspecified                         |
| 19 | 10185  | L13..00 | Excessive pregnancy vomiting                                |
| 20 | 10184  | 67A3.00 | Pregnancy smoking advice                                    |
| 21 | 97349  | L121300 | Renal hypertension in preg/childbirth/puerp - not delivered |
| 22 | 101518 | L132z00 | Late pregnancy vomiting NOS                                 |
| 23 | 71730  | L123300 | Transient hypertension of pregnancy - not delivered         |
| 24 | 31162  | L165.00 | Asymptomatic bacteriuria in pregnancy                       |
| 25 | 52048  | Z22AB11 | Accidental pregnancy                                        |
| 26 | 54938  | L162000 | Unspecified renal disease in pregnancy unspecified          |
| 27 | 62358  | L167000 | Liver disorder in pregnancy unspecified                     |
| 28 | 110888 | 67lt.00 | Advice on risk harm to mother from maternl medictn dur preg |
| 29 | 38771  | Lyu2200 | [X]Other venous complications in pregnancy                  |
| 30 | 15634  | L166z00 | Genitourinary tract infection in pregnancy NOS              |
| 31 | 43000  | L16D.00 | Excessive weight gain in pregnancy                          |
| 32 | 14651  | 13H8.00 | Illegitimate pregnancy                                      |
| 33 | 108236 | 621D.00 | Concealed pregnancy                                         |
| 34 | 15033  | ZV61900 | [V]Other unwanted pregnancy                                 |
| 35 | 67164  | L18z300 | Medical condition NOS in pregnancy - baby not yet delivered |
| 36 | 93303  | ZV22400 | [V]Supervision of other normal pregnancy                    |
| 37 | 6184   | ZV22.00 | [V]Normal pregnancy                                         |
| 38 | 48281  | Z22D200 | Non-viable pregnancy                                        |
| 39 | 29746  | 8B75.00 | Vitamin supplement - pregnancy                              |
| 40 | 16611  | ZV22300 | [V]Pregnant state, incidental                               |
| 41 | 1130   | L210.00 | Twin pregnancy                                              |
| 42 | 52221  | L03y000 | Cervical pregnancy                                          |
| 43 | 59650  | Z235300 | Transversely enlarged pregnant abdomen                      |
| 44 | 69327  | L10yz00 | Other haemorrhage in early pregnancy NOS                    |
| 45 | 51956  | L212200 | Quadruplet pregnancy with antenatal problem                 |
| 46 | 10306  | Z22C314 | Weeks pregnant                                              |
| 47 | 45965  | Z22C311 | Pregnancy duration                                          |
| 48 | 26055  | L263A00 | Maternal care for fetal bradycardia during pregnancy        |
| 49 |        |         |                                                             |
| 50 |        |         |                                                             |
| 51 |        |         |                                                             |
| 52 |        |         |                                                             |
| 53 |        |         |                                                             |
| 54 |        |         |                                                             |
| 55 |        |         |                                                             |
| 56 |        |         |                                                             |
| 57 |        |         |                                                             |
| 58 |        |         |                                                             |
| 59 |        |         |                                                             |
| 60 |        |         |                                                             |



|    |        |         |                                                                |
|----|--------|---------|----------------------------------------------------------------|
| 1  |        |         |                                                                |
| 2  |        |         |                                                                |
| 3  | 61301  | L10y000 | Other haemorrhage in early pregnancy unspecified               |
| 4  | 10261  | L2...00 | Risk factors in pregnancy                                      |
| 5  | 106268 | 8IEc.00 | Pertussis vaccination in pregnancy declined                    |
| 6  | 24944  | L163300 | Pregnancy care of habitual aborter                             |
| 7  | 20118  | 62O..12 | Static weight gain pregnancy                                   |
| 8  | 58142  | L16A000 | Glycosuria during pregnancy unspecified                        |
| 9  | 61835  | L161z00 | Oedema or excessive weight gain in pregnancy NOS               |
| 10 | 23995  | L15..11 | Post-term pregnancy                                            |
| 11 | 35646  | L123z00 | Transient hypertension of pregnancy NOS                        |
| 12 | 93895  | Z22B500 | Quintuplet pregnancy                                           |
| 13 | 65256  | L164.00 | Peripheral neuritis in pregnancy                               |
| 14 | 67975  | L166.00 | Genitourinary tract infections in pregnancy                    |
| 15 | 36006  | L16z.00 | Pregnancy complication NOS                                     |
| 16 | 61466  | Z22A211 | HRP - High risk pregnancy                                      |
| 17 | 26866  | L2y..00 | Other specified risk factors in pregnancy                      |
| 18 | 35855  | L15z.00 | Prolonged pregnancy NOS                                        |
| 19 | 2937   | L175.11 | Rubella contact in pregnancy                                   |
| 20 | 50421  | Z22A900 | Unwanted pregnancy                                             |
| 21 | 37048  | 6282    | A/N care:10yrs+since last preg                                 |
| 22 | 49193  | 67A7.11 | Care of teeth advice -in preg.                                 |
| 23 | 11986  | 7E13300 | Excision of ruptured ectopic tubal pregnancy                   |
| 24 | 97034  | 67AE.00 | Folic acid advice in first trimester of pregnancy              |
| 25 | 106737 | 9mK2.00 | Pertussis vaccination in pregnancy invitation third letter     |
| 26 | 102362 | 389B.00 | Assessment for termination of pregnancy                        |
| 27 | 55618  | ZV23600 | [V]Supervise/pregnancy wth history insufficient antenatal care |
| 28 | 37038  | Z23D100 | Girth of pregnant abdomen                                      |
| 29 | 29631  | 6222    | Antenatal care: 2nd pregnancy                                  |
| 30 | 65555  | L132.00 | Late vomiting of pregnancy                                     |
| 31 | 107698 | Z236300 | Pregnant uterus displaced laterally                            |
| 32 | 4536   | 621..11 | Pregnancy confirmed                                            |
| 33 | 111540 | L415500 | Other phlebitis in pregnancy                                   |
| 34 | 32493  | Z22AD00 | Presentation of pregnancy                                      |
| 35 | 44729  | L031000 | Fallopian tube pregnancy                                       |
| 36 | 43140  | 67A2.00 | Diet in pregnancy advice                                       |
| 37 | 91888  | L181300 | Thyroid dysfunction in pregnancy - baby not yet delivered      |
| 38 | 12837  | 7F2B100 | Ultrasound monitoring of early pregnancy                       |
| 39 | 30351  | 67A6.00 | Drugs in pregnancy advice                                      |
| 40 | 15567  | 6218    | Pregnant -unplanned-not wanted                                 |
| 41 | 33724  | L03z.00 | Ectopic pregnancy NOS                                          |
| 42 | 100892 | Lyu2400 | [X]Other+unspcf genitourinary tract infection in pregnancy     |
| 43 | 127    | 62...00 | Patient pregnant                                               |
| 44 | 13672  | 8HHf.00 | Refer to early pregnancy unit                                  |
| 45 | 32073  | L0...00 | Pregnancy with abortive outcome                                |
| 46 | 64292  | L16y300 | Other pregnancy complication - not delivered                   |
| 47 | 106425 | 62NL.00 | Antenatal 31 week examination                                  |
| 48 |        |         |                                                                |
| 49 |        |         |                                                                |
| 50 |        |         |                                                                |
| 51 |        |         |                                                                |
| 52 |        |         |                                                                |
| 53 |        |         |                                                                |
| 54 |        |         |                                                                |
| 55 |        |         |                                                                |
| 56 |        |         |                                                                |
| 57 |        |         |                                                                |
| 58 |        |         |                                                                |
| 59 |        |         |                                                                |
| 60 |        |         |                                                                |

|    |        |         |                                                              |
|----|--------|---------|--------------------------------------------------------------|
| 1  |        |         |                                                              |
| 2  |        |         |                                                              |
| 3  |        |         |                                                              |
| 4  | 109543 | L332200 | Cord tangled with compression with antenatal problem         |
| 5  | 102300 | Lyu2A00 | [X]Abnormal finding on antenatal screening of mother         |
| 6  | 111263 | L230200 | Disproportion - major pelvic abnormality with antenatal prob |
| 7  | 55111  | 6B22.00 | Sure Start antenatal visit                                   |
| 8  | 13418  | 62W..00 | Antenatal blood tests                                        |
| 9  | 61533  | L270200 | Polyhydramnios with antenatal problem                        |
| 10 | 14085  | 62GB.00 | Antenatal ultrasounds scan at 4-8 weeks                      |
| 11 | 42326  | 62KZ.00 | Antenatal syphilis screen NOS                                |
| 12 | 18536  | 62b..00 | Antenatal HIV screening                                      |
| 13 | 99475  | 68b5.00 | Antenatal screening result pending                           |
| 14 | 13168  | 62NZ.00 | Antenatal examination NOS                                    |
| 15 | 63448  | Z675.00 | Antenatal class                                              |
| 16 | 100596 | 68b3.00 | Antenatal screening shows significant disorder               |
| 17 | 67926  | ZV28z00 | [V]Unspecified antenatal screening                           |
| 18 | 16613  | 584C.00 | Antenatal ultrasound result received                         |
| 19 | 23667  | L413.00 | Antenatal deep vein thrombosis                               |
| 20 | 53683  | L452300 | Obstetric nonpurulent mastitis with antenatal complication   |
| 21 | 104764 | L236200 | Hydrocephalic disproportion with antenatal problem           |
| 22 | 56967  | 9NV1.00 | Antenatal clinic                                             |
| 23 | 13417  | 62K..00 | Antenatal syphilis screen                                    |
| 24 | 108099 | L39z300 | Complications of labour and delivery NOS with antenatal prob |
| 25 | 70096  | L224200 | Transverse lie with antenatal problem                        |
| 26 | 104359 | ZVu2600 | [X]Other antenatal screening based on amniocentesis          |
| 27 | 294    | 62...11 | Antenatal care                                               |
| 28 | 104178 | Lyu2600 | [X]Other abnormal findings on antenatal screening of mother  |
| 29 | 27056  | 62GD.00 | Antenatal ultrasound scan at 17-22 weeks                     |
| 30 | 98481  | 68b4.00 | Repeat antenatal screening required                          |
| 31 | 14084  | 62GC.00 | Antenatal ultrasound scan at 9-16 weeks                      |
| 32 | 28732  | 62c..00 | Antenatal screening                                          |
| 33 | 6095   | 9N1N.00 | Seen in antenatal clinic                                     |
| 34 | 99849  | 68bA.00 | Antenatal screening, at risk couple identified               |
| 35 | 21957  | 62I..11 | AFP test - antenatal                                         |
| 36 | 73765  | L311200 | Secondary uterine inertia with antenatal problem             |
| 37 | 102246 | L265200 | Small-for-dates with antenatal problem                       |
| 38 | 73191  | L226200 | Brow presentation with antenatal problem                     |
| 39 | 69254  | L264200 | Intrauterine death with antenatal problem                    |
| 40 | 104766 | L30z200 | Obstructed labour NOS with antenatal problem                 |
| 41 | 109071 | 38B6.00 | Antenatal risk assessment                                    |
| 42 | 7845   | Z212.00 | Antenatal care                                               |
| 43 | 30378  | L244312 | Rectocele complicating antenatal care - baby not delivered   |
| 44 | 101938 | L390300 | Maternal distress with antenatal problem                     |
| 45 | 90277  | L350200 | Rupture of uterus before labour with antenatal problem       |
| 46 | 97259  | 68b6.00 | Antenatal screening declined                                 |
| 47 | 111183 | 8IHD.00 | Health visitor antenatal visit declined                      |
| 48 | 106588 | 62NJ.00 | Antenatal 22 week examination                                |
| 49 |        |         |                                                              |
| 50 |        |         |                                                              |
| 51 |        |         |                                                              |
| 52 |        |         |                                                              |
| 53 |        |         |                                                              |
| 54 |        |         |                                                              |
| 55 |        |         |                                                              |
| 56 |        |         |                                                              |
| 57 |        |         |                                                              |
| 58 |        |         |                                                              |
| 59 |        |         |                                                              |
| 60 |        |         |                                                              |

|    |        |         |                                                              |
|----|--------|---------|--------------------------------------------------------------|
| 1  |        |         |                                                              |
| 2  |        |         |                                                              |
| 3  |        |         |                                                              |
| 4  | 30801  | 62OZ.00 | Misc. antenatal data NOS                                     |
| 5  | 49665  | ZV28600 | [V]Antenatal screening for chromosomal anomalies             |
| 6  | 21543  | 622..00 | Antenatal care: gravida No.                                  |
| 7  | 109313 | 9Nil.00 | Did not attend antenatal appointment                         |
| 8  | 102755 | 8CEM.00 | Downs syndrome antenatal screening information leaflet given |
| 9  | 37985  | L2AX.00 | Abnormal finding on antenatal screening of mother            |
| 10 | 91272  | L440300 | Puerperal cerebrovascular disorder with antenatal comp       |
| 11 | 99286  | L28y200 | Other amniotic/membrane problem with antenatal problem       |
| 12 | 99479  | L267200 | Other placental conditions with antenatal problem            |
| 13 | 10056  | 62N..00 | Antenatal examinations                                       |
| 14 | 44401  | L305200 | Shoulder dystocia with antenatal problem                     |
| 15 | 35484  | 679E.00 | Antenatal education                                          |
| 16 | 103512 | L330200 | Prolapse of cord with antenatal problem                      |
| 17 | 99939  | L33y200 | Other umbilical cord complications with antenatal problem    |
| 18 | 101354 | L244311 | Cystocele complicating antenatal care - baby not delivered   |
| 19 | 39611  | 62GE.00 | Antenatal ultrasound scan at 22-40 weeks                     |
| 20 | 40597  | ZV28y00 | [V]Other specified antenatal screening                       |
| 21 | 70046  | L2A4.00 | Abnormal radiological finding on antenatal screen of mother  |
| 22 | 105047 | L2A2.00 | Abnormal cytological finding on antenatal screen of mother   |
| 23 | 96678  | L33z200 | Umbilical cord complications NOS with antenatal problem      |
| 24 | 15685  | L2A..00 | Abnormal findings on antenatal screening of mother           |
| 25 | 2029   | 62G..00 | Antenatal ultrasound scan                                    |
| 26 | 103787 | 1514100 | Estimated date of delivery by antenatal ultrasound scan      |
| 27 | 31570  | 6224    | Antenatal care: multip                                       |
| 28 | 97391  | L281200 | Premature rupture of membranes with antenatal problem        |
| 29 | 65725  | L413000 | Antenatal deep vein thrombosis unspecified                   |
| 30 | 13819  | 62F..00 | Antenatal amniocentesis                                      |
| 31 | 107186 | L266200 | Large-for-dates with antenatal problem                       |
| 32 | 16750  | 6221    | Antenatal care: primigravida                                 |
| 33 | 71851  | L229200 | Prolapsed arm with antenatal problem                         |
| 34 | 105865 | 67AJ.00 | Provision of information about antenatal screening           |
| 35 | 109043 | 9NFV.00 | Health visitor antenatal visit                               |
| 36 | 47928  | L280200 | Oligohydramnios with antenatal problem                       |
| 37 | 6298   | ZV28.00 | [V]Antenatal screening                                       |
| 38 | 45032  | 62O..00 | Misc. antenatal data                                         |
| 39 | 66496  | L222200 | Breech presentation with antenatal problem                   |
| 40 | 444    | 8HT9.00 | Referral to antenatal clinic                                 |
| 41 | 14083  | 62GZ.00 | Antenatal ultrasound scan NOS                                |
| 42 | 13419  | 62L..00 | Antenatal blood group screen                                 |
| 43 | 42120  | L2A0.00 | Abnormal haematologic find on antenatal screening of mother  |
| 44 | 13416  | 62M..00 | Antenatal sickle cell screen                                 |
| 45 | 69788  | L260200 | Fetal-maternal haemorrhage with antenatal problem            |
| 46 | 73734  | ZVu2900 | [X]Other antenatal screening                                 |
| 47 | 95107  | L312200 | Other uterine inertia with antenatal problem                 |
| 48 | 103677 | Eu32B00 | [X]Antenatal depression                                      |
| 49 |        |         |                                                              |
| 50 |        |         |                                                              |
| 51 |        |         |                                                              |
| 52 |        |         |                                                              |
| 53 |        |         |                                                              |
| 54 |        |         |                                                              |
| 55 |        |         |                                                              |
| 56 |        |         |                                                              |
| 57 |        |         |                                                              |
| 58 |        |         |                                                              |
| 59 |        |         |                                                              |
| 60 |        |         |                                                              |

|    |        |         |                                                              |
|----|--------|---------|--------------------------------------------------------------|
| 1  |        |         |                                                              |
| 2  |        |         |                                                              |
| 3  |        |         |                                                              |
| 4  | 106923 | 62NK.00 | Antenatal 25 week examination                                |
| 5  | 108811 | L245300 | Cervical incompetence with antenatal problem                 |
| 6  | 73407  | L261200 | Rhesus isoimmunisation with antenatal problem                |
| 7  | 101980 | 65QG.00 | Antenatal screening shows non sig haemoglobinopathy carrier  |
| 8  | 44828  | L263200 | Fetal distress with antenatal problem                        |
| 9  | 45091  | 62Y..00 | Routine antenatal care                                       |
| 10 |        |         |                                                              |
| 11 | 71862  | L323200 | Delayed delivery second twin with antenatal problem          |
| 12 | 71794  | L307200 | Other failed trial of labour with antenatal problem          |
| 13 |        |         |                                                              |
| 14 | 51432  | 62FZ.00 | Antenatal amniocentesis NOS                                  |
| 15 | 97523  | 68b..00 | Antenatal screening status                                   |
| 16 | 28290  | L2A3.00 | Abnormal ultrasonic finding on antenatal screening of mother |
| 17 | 36226  | L2A1.00 | Abnormal biochemical finding on antenatal screen of mother   |
| 18 | 100502 | L413200 | Antenatal deep vein thrombosis with antenatal complication   |
| 19 | 61203  | L413z00 | Antenatal deep vein thrombosis NOS                           |
| 20 | 100578 | L255200 | Fetus with drug damage with antenatal problem                |
| 21 | 69072  | L262200 | Other blood-group isoimmunisation with antenatal problem     |
| 22 | 49617  | 622Z.00 | Antenatal care: gravida NOS                                  |
| 23 | 26873  | L413.11 | DVT - deep venous thrombosis, antenatal                      |
| 24 | 33009  | 6254    | A/N care: H/O child abuse                                    |
| 25 | 29610  | 62NB.00 | A/N 36 week examination                                      |
| 26 | 61162  | L250200 | Fetus with central nervous system malformation + a/n problem |
| 27 | 52044  | 6252    | A/N care: poor A/N attender                                  |
| 28 | 35513  | 6284    | A/N care: primip. > 30 years                                 |
| 29 | 26695  | 625Z.00 | A/N care: social risk NOS                                    |
| 30 | 55605  | 62NH.00 | A/N 42 week examination                                      |
| 31 | 30797  | 6233    | A/N care: grand multip                                       |
| 32 | 23013  | 6231    | A/N care: uncertain dates                                    |
| 33 | 36516  | 62F4.00 | A/N amniocentesis wanted                                     |
| 34 | 37046  | 628Z.00 | A/N risk NOS                                                 |
| 35 | 107506 | 62H2.00 | A/N Rh screen offered                                        |
| 36 | 25331  | 62O6.11 | Vaginal 'show' - A/N                                         |
| 37 | 64537  | 62GA.00 | A/N U/S scan for slow growth                                 |
| 38 | 13821  | 62F6.00 | A/N amniocentesis - normal                                   |
| 39 | 19772  | 62F3.00 | A/N amniocentesis - not wanted                               |
| 40 | 70840  | L240311 | Bicornuate uterus complicating a/n care, baby not delivered  |
| 41 | 33287  | 62F1.00 | A/N amniocentesis -not offered                               |
| 42 | 13171  | 62N8.00 | A/N 32 week examination                                      |
| 43 | 52049  | 62G3.00 | A/N U/S scan not wanted                                      |
| 44 | 33008  | 6285    | A/N care: multip. > 35 years                                 |
| 45 | 26696  | 6253    | A/N care: late booker                                        |
| 46 | 24219  | 62A..00 | A/N care provider                                            |
| 47 | 13308  | 625..00 | A/N care: social risk                                        |
| 48 | 26692  | 6236    | A/N care: poor obstetr history                               |
| 49 | 37222  | 62G1.00 | A/N U/S scan not offered                                     |
| 50 | 25391  | 62I..12 | Alpha-feto protein test - A/N                                |
| 51 |        |         |                                                              |
| 52 |        |         |                                                              |
| 53 |        |         |                                                              |
| 54 |        |         |                                                              |
| 55 |        |         |                                                              |
| 56 |        |         |                                                              |
| 57 |        |         |                                                              |
| 58 |        |         |                                                              |
| 59 |        |         |                                                              |
| 60 |        |         |                                                              |

|    |        |         |                                                              |
|----|--------|---------|--------------------------------------------------------------|
| 1  |        |         |                                                              |
| 2  |        |         |                                                              |
| 3  | 35512  | 6281    | A/N care: under 5ft tall                                     |
| 4  | 31251  | 627..00 | A/N care: gynae. risk                                        |
| 5  | 26551  | 62NE.00 | A/N 39 week examination                                      |
| 6  | 68089  | 62HZ.00 | A/N Rh antibody screen NOS                                   |
| 7  |        |         |                                                              |
| 8  | 26691  | 6235    | A/N care: H/O perinatal death                                |
| 9  |        |         |                                                              |
| 10 | 35826  | 62G6.00 | A/N U/S scan normal += dates                                 |
| 11 | 30885  | 62G4.00 | A/N U/S scan wanted                                          |
| 12 | 70289  | 62F9.00 | A/N amnio. for ? neural tube                                 |
| 13 |        |         |                                                              |
| 14 | 26693  | 626..00 | A/N care: medical risk                                       |
| 15 | 73099  | L246311 | Polyp of cervix complicating a/n care- baby not delivered    |
| 16 | 20401  | L241311 | Uterine fibroid complicating a/n care, baby not delivered    |
| 17 |        |         |                                                              |
| 18 | 65450  | 62F2.00 | A/N amniocentesis - offered                                  |
| 19 | 24236  | 62AZ.00 | A/N care provider NOS                                        |
| 20 | 26553  | 62ND.00 | A/N 38 week examination                                      |
| 21 |        |         |                                                              |
| 22 | 102160 | L283200 | Prolonged artificial rupture of membranes with a/n problem   |
| 23 | 64141  | 62K2.00 | A/N syphilis screen-blood sent                               |
| 24 | 26550  | 62A2.00 | A/N care from consultant                                     |
| 25 | 89025  | L237200 | Other fetal abnormality causing disproportion with a/n prob  |
| 26 |        |         |                                                              |
| 27 | 102099 | 62MZ.00 | A/N sickle cell screen NOS                                   |
| 28 | 47415  | 62G5.00 | A/N U/S scan awaited                                         |
| 29 | 13415  | 62A4.00 | A/N care midwifery led                                       |
| 30 | 54734  | L28z200 | Amniotic cavity and membrane problem NOS with a/n problem    |
| 31 |        |         |                                                              |
| 32 | 14086  | 62G8.00 | A/N U/S scan abnormal                                        |
| 33 | 37221  | 62G7.00 | A/N U/S scan normal +? dates                                 |
| 34 | 66608  | L241300 | Tumour of uterine body complicating a/n care, baby not deliv |
| 35 |        |         |                                                              |
| 36 | 71797  | L248300 | Vulval abn complicating a/n care - baby not yet delivered    |
| 37 | 37029  | 62NG.00 | A/N 41 week examination                                      |
| 38 | 29727  | 62NA.00 | A/N 35 week examination                                      |
| 39 |        |         |                                                              |
| 40 | 108885 | 62L1.00 | A/N blood gp screen not done                                 |
| 41 | 39172  | 62L2.00 | A/N blood group screen done                                  |
| 42 | 38165  | 6237    | A/N care: H/O trophoblast.dis.                               |
| 43 | 35511  | 6234    | A/N care: H/O stillbirth                                     |
| 44 | 26875  | 6232    | A/N care: recurrent aborter                                  |
| 45 |        |         |                                                              |
| 46 | 9546   | 623..00 | A/N care: obstetric risk                                     |
| 47 | 73120  | L247300 | Vaginal abnormality complicating a/n care-baby not delivered |
| 48 | 24214  | 62A1.00 | A/N care from G.P.                                           |
| 49 |        |         |                                                              |
| 50 | 13169  | 62N5.00 | A/N 24 week examination                                      |
| 51 | 29627  | 62N7.00 | A/N 30 week examination                                      |
| 52 | 3517   | 62N1.00 | A/N booking examination                                      |
| 53 |        |         |                                                              |
| 54 | 62147  | 62F8.00 | A/N amnio. for ? chrom.abnorm.                               |
| 55 | 37047  | 6242    | A/N care: H/O infertility                                    |
| 56 | 27057  | 62G9.00 | A/N U/S scan for ? abnormality                               |
| 57 |        |         |                                                              |
| 58 | 70616  | 62M2.00 | A/N sickle cell screen done                                  |
| 59 | 29059  | 62A3.00 | A/N - shared care                                            |
| 60 | 108867 | 62M1.00 | A/N sickle screen not done                                   |

|    |        |         |                                                              |
|----|--------|---------|--------------------------------------------------------------|
| 1  |        |         |                                                              |
| 2  |        |         |                                                              |
| 3  | 12260  | 62H..00 | A/N Rh antibody screen                                       |
| 4  | 41955  | 62F5.00 | A/N amniocentesis - awaited                                  |
| 5  | 13166  | 62N3.00 | A/N 16 week examination                                      |
| 6  | 35510  | 6241    | A/N care: elderly primip.                                    |
| 7  | 26552  | 62NC.00 | A/N 37 week examination                                      |
| 8  | 29280  | 62NF.00 | A/N 40 week examination                                      |
| 9  | 3786   | 628..00 | A/N care: risk NOS                                           |
| 10 | 39728  | 62O..11 | Fetal maturity - A/N                                         |
| 11 | 13822  | 62F7.00 | A/N amniocentesis - abnormal                                 |
| 12 | 71912  | 62H1.00 | A/N Rh screen not offered                                    |
| 13 | 26694  | 6251    | A/N care: poor home conditions                               |
| 14 | 70186  | 62LZ.00 | A/N blood group screen NOS                                   |
| 15 | 26690  | 623Z.00 | A/N care: obstetric risk NOS                                 |
| 16 | 98957  | L240300 | Cong abnorm uterus complicating a/n care, baby not delivered |
| 17 | 13170  | 62N9.00 | A/N 34 week examination                                      |
| 18 | 109166 | 62K1.00 | A/N syphilis screen not done                                 |
| 19 | 13167  | 62N2.00 | A/N 12 weeks examination                                     |
| 20 | 37220  | 62G2.00 | A/N U/S scan offered                                         |
| 21 | 29364  | 62N4.00 | A/N 20 week examination                                      |
| 22 | 26554  | 62N6.00 | A/N 28 week examination                                      |
| 23 | 31250  | 6283    | A/N care: primip. < 17 years                                 |
| 24 | 30209  | ZV27000 | [V]Single live birth                                         |
| 25 | 20573  | Q48D000 | [X]Fresh stillbirth                                          |
| 26 | 11966  | ZV27.11 | [V]Live birth                                                |
| 27 | 8906   | ZV27.12 | [V]Stillbirth                                                |
| 28 | 41253  | 7F...11 | Childbirth operations                                        |
| 29 | 10719  | 6331    | Single live birth                                            |
| 30 | 28726  | 7F19100 | Water birth delivery                                         |
| 31 | 58978  | Q20y.00 | Other specified birth trauma                                 |
| 32 | 37884  | Z254D00 | Face to pubes birth                                          |
| 33 | 72025  | ZV3zz00 | [V]Unspecified birth, NOS                                    |
| 34 | 8776   | Q48D.00 | [X] Stillbirth                                               |
| 35 | 5253   | 633a.00 | Birth of child                                               |
| 36 | 31203  | 6332    | Single stillbirth                                            |
| 37 | 13287  | 633..11 | Livebirth                                                    |
| 38 | 17354  | 633..13 | Triplet birth                                                |
| 39 | 1825   | 633..14 | Twin birth                                                   |
| 40 | 1214   | 6311    | Home birth                                                   |
| 41 | 2353   | 63E2.00 | Normal birth                                                 |
| 42 | 974    | Q4z..15 | Stillbirth NEC                                               |
| 43 | 110211 | 633C.00 | Intrapartum stillbirth                                       |
| 44 | 70813  | ZV27500 | [V]Other multiple birth, all live born                       |
| 45 | 37878  | Z254E11 | Multiple birth delivery                                      |
| 46 | 42324  | L34z.00 | Vulval/perineal trauma during delivery NOS                   |
| 47 | 55124  | L39yz00 | Other complications of labour and delivery NOS               |
| 48 |        |         |                                                              |
| 49 |        |         |                                                              |
| 50 |        |         |                                                              |
| 51 |        |         |                                                              |
| 52 |        |         |                                                              |
| 53 |        |         |                                                              |
| 54 |        |         |                                                              |
| 55 |        |         |                                                              |
| 56 |        |         |                                                              |
| 57 |        |         |                                                              |
| 58 |        |         |                                                              |
| 59 |        |         |                                                              |
| 60 |        |         |                                                              |

|    |        |         |                                                              |
|----|--------|---------|--------------------------------------------------------------|
| 1  |        |         |                                                              |
| 2  |        |         |                                                              |
| 3  | 27351  | Q036.00 | Fetus or neonate affected by precipitate delivery            |
| 4  | 43918  | L340400 | Fourchette tear during delivery                              |
| 5  | 33915  | L213.00 | Multiple delivery                                            |
| 6  | 5213   | 7F16400 | Low forceps cephalic delivery                                |
| 7  |        |         |                                                              |
| 8  | 25223  | L396.00 | Vacuum extractor delivery                                    |
| 9  | 57957  | 7F1Ay00 | Other specified other method of delivery                     |
| 10 | 7670   | L398z00 | Caesarean delivery NOS                                       |
| 11 | 24243  | L263400 | Labour and delivery complic by meconium in amniotic fluid    |
| 12 | 15828  | 14Y4.00 | Born by breech delivery                                      |
| 13 | 69780  | Lyu5100 | [X]Other and unspecified forceps delivery                    |
| 14 | 62862  | L342200 | Third degree perineal tear during delivery with p/n problem  |
| 15 | 68752  | Z253300 | Normal rate of delivery                                      |
| 16 | 33773  | 7F19y00 | Other specified normal delivery                              |
| 17 | 30775  | 62B8.00 | Midwife unit delivery booking                                |
| 18 | 6452   | L395.00 | Forceps delivery                                             |
| 19 | 239    | L20..11 | Spontaneous vaginal delivery                                 |
| 20 | 95858  | L34y100 | Other vulval/perineal trauma during delivery- delivered      |
| 21 | 29070  | 7F15000 | Spontaneous breech delivery                                  |
| 22 | 19605  | L341z00 | Second degree perineal tear during delivery NOS              |
| 23 | 57945  | 7F17200 | Vacuum delivery before full dilation of cervix               |
| 24 | 72022  | L343000 | Fourth degree perineal tear during delivery, unspecified     |
| 25 | 19607  | L344000 | Unspecified perineal laceration during delivery, unspecified |
| 26 | 3365   | L142.11 | Premature delivery                                           |
| 27 | 27914  | 62V..00 | Delivery place planned                                       |
| 28 | 90885  | Lyu4900 | [X]Labour+delivery complicated by other cord entanglement    |
| 29 | 56310  | Z25..00 | Delivery observations                                        |
| 30 | 12052  | Z257.00 | Delivery normal                                              |
| 31 | 11532  | 7F14.00 | Breech extraction delivery                                   |
| 32 | 13164  | 62BZ.00 | Delivery booking - place NOS                                 |
| 33 | 61212  | L34y.00 | Other vulval and perineal trauma during delivery             |
| 34 | 61077  | 7F16200 | Mid forceps cephalic delivery with rotation                  |
| 35 | 5866   | 7F1..00 | Induction and delivery operations                            |
| 36 | 65940  | 7F16500 | Trial of forceps delivery                                    |
| 37 | 19608  | L340z00 | First degree perineal tear during delivery NOS               |
| 38 | 52875  | L398000 | Caesarean delivery unspecified                               |
| 39 | 83535  | Lyu5000 | [X]Other single spontaneous delivery                         |
| 40 | 47625  | Z22C200 | Estimated date of delivery from last normal period           |
| 41 | 17744  | 7F13100 | Lower uterine segment caesarean delivery NEC                 |
| 42 | 15073  | 7F13y00 | Other specified other caesarean delivery                     |
| 43 | 9800   | L398300 | Delivery by elective caesarean section                       |
| 44 | 37699  | L396z00 | Vacuum extractor delivery NOS                                |
| 45 | 72021  | L343100 | Fourth degree perineal tear during delivery - delivered      |
| 46 | 107136 | Q031.11 | Fetus affected by malpresentation during delivery            |
| 47 | 17684  | L395.11 | Keilland's forceps delivery                                  |
| 48 | 20425  | L395.12 | Neville - Barnes forceps delivery                            |
| 49 |        |         |                                                              |
| 50 |        |         |                                                              |
| 51 |        |         |                                                              |
| 52 |        |         |                                                              |
| 53 |        |         |                                                              |
| 54 |        |         |                                                              |
| 55 |        |         |                                                              |
| 56 |        |         |                                                              |
| 57 |        |         |                                                              |
| 58 |        |         |                                                              |
| 59 |        |         |                                                              |
| 60 |        |         |                                                              |

|    |        |         |                                                             |
|----|--------|---------|-------------------------------------------------------------|
| 1  |        |         |                                                             |
| 2  |        |         |                                                             |
| 3  |        |         |                                                             |
| 4  | 4780   | L20..00 | Normal delivery in a completely normal case                 |
| 5  | 5868   | Ly0..00 | Spontaneous vertex delivery                                 |
| 6  | 106113 | Lyu5800 | [X]Multiple delivery, unspecified                           |
| 7  | 62406  | L323000 | Delayed delivery second twin unspecified                    |
| 8  | 61540  | Z212100 | Delivery place planned                                      |
| 9  | 47157  | L34zz00 | Vulval/perineal trauma during delivery NOS                  |
| 10 | 58176  | 62C2.00 | Full stay delivery booking                                  |
| 11 | 32283  | Z212200 | Home delivery planned                                       |
| 12 | 106808 | L34z200 | Vulval/perineal trauma during delivery NOS with p/n problem |
| 13 | 740    | 7F12.00 | Elective caesarean delivery                                 |
| 14 | 111579 | Z263300 | Condition of membranes at delivery                          |
| 15 | 34102  | Z262700 | Incomplete placenta at delivery                             |
| 16 | 21554  | 7F16900 | Kielland forceps cephalic delivery with rotation            |
| 17 | 31254  | L340100 | First degree perineal tear during delivery - delivered      |
| 18 | 23394  | 7F16300 | Mid forceps cephalic delivery NEC                           |
| 19 | 54591  | 7F14z00 | Breech extraction delivery NOS                              |
| 20 | 3085   | 7F12z00 | Elective caesarean delivery NOS                             |
| 21 | 22491  | Ly1..00 | Spontaneous breech delivery                                 |
| 22 | 19609  | L340600 | Vaginal tear during delivery                                |
| 23 | 39168  | L342100 | Third degree perineal tear during delivery - delivered      |
| 24 | 44235  | L296.00 | Vaginal delivery following previous caesarean section       |
| 25 | 40706  | L344z00 | Unspecified perineal laceration during delivery NOS         |
| 26 | 27993  | 62V0.00 | Home delivery planned                                       |
| 27 | 58721  | L20z.00 | Normal delivery in completely normal case NOS               |
| 28 | 33477  | L398100 | Caesarean delivery - delivered                              |
| 29 | 27963  | L323.00 | Delayed delivery of second twin, triplet etc                |
| 30 | 37509  | 7F1A300 | Drainage of hydrocephalus of fetus to facilitate delivery   |
| 31 | 30806  | L34yz00 | Other vulval/perineal trauma during delivery NOS            |
| 32 | 30373  | Z22C100 | Estimated date of delivery from last period                 |
| 33 | 42572  | L323100 | Delayed delivery second twin - delivered                    |
| 34 | 15514  | 7F13000 | Upper uterine segment caesarean delivery NEC                |
| 35 | 47546  | 7F12y00 | Other specified elective caesarean delivery                 |
| 36 | 86399  | 7F17y00 | Other specified vacuum delivery                             |
| 37 | 13352  | L34..00 | Trauma to perineum and vulva during delivery                |
| 38 | 49446  | L396100 | Vacuum extractor delivery - delivered                       |
| 39 | 15256  | L344.00 | Unspecified perineal laceration during delivery             |
| 40 | 37054  | L341100 | Second degree perineal tear during delivery - delivered     |
| 41 | 3108   | 7F1B000 | Episiotomy to facilitate delivery                           |
| 42 | 47863  | Lyu5200 | [X]Other single delivery by caesarean section               |
| 43 | 9160   | Z257100 | Spontaneous vertex delivery                                 |
| 44 | 58844  | L396000 | Vacuum extractor delivery unspecified                       |
| 45 | 57488  | L34z100 | Vulval/perineal trauma during delivery NOS - delivered      |
| 46 | 27731  | L345.12 | Vulval and perineal haematoma during delivery               |
| 47 | 104872 | L143100 | Premature labour with premature delivery                    |
| 48 | 42275  | L395300 | Mid-cavity forceps delivery                                 |
| 49 |        |         |                                                             |
| 50 |        |         |                                                             |
| 51 |        |         |                                                             |
| 52 |        |         |                                                             |
| 53 |        |         |                                                             |
| 54 |        |         |                                                             |
| 55 |        |         |                                                             |
| 56 |        |         |                                                             |
| 57 |        |         |                                                             |
| 58 |        |         |                                                             |
| 59 |        |         |                                                             |
| 60 |        |         |                                                             |



|    |       |         |                                                              |
|----|-------|---------|--------------------------------------------------------------|
| 1  |       |         |                                                              |
| 2  |       |         |                                                              |
| 3  |       |         |                                                              |
| 4  | 40876 | L342z00 | Third degree perineal tear during delivery NOS               |
| 5  | 93273 | L39z100 | Complications of labour and delivery NOS - delivered         |
| 6  | 42755 | L387.00 | Spinal/epidural ansth-induced headache dur labour/delivery   |
| 7  | 57789 | L395400 | Delivery by combination of forceps and vacuum extractor      |
| 8  |       |         |                                                              |
| 9  | 19603 | L340000 | First degree perineal tear during delivery, unspecified      |
| 10 | 4786  | L213200 | Multiple delivery, all by caesarean section                  |
| 11 | 20002 | 7F16000 | High forceps cephalic delivery with rotation                 |
| 12 | 66501 | L39zz00 | Complications of labour and delivery NOS                     |
| 13 | 34333 | Z262711 | Incomplete delivery of placenta                              |
| 14 | 19602 | L341000 | Second degree perineal tear during delivery, unspecified     |
| 15 | 39866 | 7F1A200 | Cleidotomy of fetus to facilitate delivery                   |
| 16 |       |         |                                                              |
| 17 | 30805 | L34y000 | Other vulval/perineal trauma during delivery, unspecified    |
| 18 | 11530 | Z254900 | Vaginal delivery                                             |
| 19 |       |         |                                                              |
| 20 | 67489 | L34z000 | Vulval/perineal trauma during delivery NOS unspec            |
| 21 | 4638  | 7F13.00 | Other caesarean delivery                                     |
| 22 | 40744 | Z254A00 | Abnormal delivery                                            |
| 23 |       |         |                                                              |
| 24 | 25157 | L142100 | Early onset of delivery - delivered                          |
| 25 | 17704 | L395.13 | Simpson's forceps delivery                                   |
| 26 |       |         |                                                              |
| 27 | 39573 | Z265900 | Umbilical cord not around baby's neck at delivery            |
| 28 | 5033  | 7F16100 | High forceps cephalic delivery NEC                           |
| 29 | 26549 | 62B1.00 | Delivery: no place booked                                    |
| 30 | 50293 | 7F1z.00 | Induction and delivery operations NOS                        |
| 31 |       |         |                                                              |
| 32 | 67862 | L39..00 | Other complications of labour and delivery NEC               |
| 33 | 63277 | L393.00 | Acute renal failure following labour and delivery            |
| 34 | 32380 | L34..12 | Vulval delivery trauma                                       |
| 35 |       |         |                                                              |
| 36 | 23866 | 7F1B100 | Symphysiotomy to facilitate delivery                         |
| 37 | 618   | L398400 | Delivery by emergency caesarean section                      |
| 38 | 66315 | Lyu5500 | [X]Other specified assisted single delivery                  |
| 39 | 23791 | L38A.00 | Failed or difficult intubation during labour and delivery    |
| 40 |       |         |                                                              |
| 41 | 99608 | 7F1Bz00 | Other operation to facilitate delivery NOS                   |
| 42 | 98749 | 7F1B400 | Incision of cervix to facilitate delivery                    |
| 43 | 30274 | L395200 | Low forceps delivery                                         |
| 44 |       |         |                                                              |
| 45 | 35190 | 7F13z00 | Other caesarean delivery NOS                                 |
| 46 | 40710 | L395z00 | Forceps delivery NOS                                         |
| 47 | 26712 | L340300 | Labial tear during delivery                                  |
| 48 | 62789 | Q031.00 | Fetus/neonate affected by malposition/disproportion-delivery |
| 49 | 2624  | Q033.00 | Fetus or neonate affected by vacuum extraction delivery      |
| 50 |       |         |                                                              |
| 51 | 19599 | L340.00 | First degree perineal tear during delivery                   |
| 52 | 11650 | L342.00 | Third degree perineal tear during delivery                   |
| 53 |       |         |                                                              |
| 54 | 51736 | 7F17100 | Low vacuum delivery                                          |
| 55 | 36703 | L345.00 | Vulval and perineal haematoma during delivery                |
| 56 | 2458  | 7F17.00 | Vacuum delivery                                              |
| 57 |       |         |                                                              |
| 58 | 22975 | 62B3.00 | G.P. unit delivery booking                                   |
| 59 | 32988 | 62B5.00 | Private home delivery booking                                |
| 60 | 49485 | L263600 | Labour+delivery complicatd by biochem evidence/fetal stress  |

|    |        |         |                                                             |
|----|--------|---------|-------------------------------------------------------------|
| 1  |        |         |                                                             |
| 2  |        |         |                                                             |
| 3  |        |         |                                                             |
| 4  | 5522   | L3z..00 | Complications of labour and delivery NOS                    |
| 5  | 103319 | Lyu4.00 | [X]Complications of labour and delivery                     |
| 6  | 14789  | Q030.11 | Fetus affected by breech delivery                           |
| 7  | 34411  | Z254300 | Delivered by mid-cavity forceps delivery                    |
| 8  | 48230  | Z254800 | Deliveries by spontaneous breech delivery                   |
| 9  | 36137  | L142z00 | Early onset of delivery NOS                                 |
| 10 | 59941  | L142000 | Early onset of delivery unspecified                         |
| 11 | 20738  | 7F19000 | Manually assisted vaginal delivery                          |
| 12 | 34628  | 7F16600 | Failed forceps delivery                                     |
| 13 | 33480  | 7F16y00 | Other specified forceps cephalic delivery                   |
| 14 | 37245  | L345000 | Vulval and perineal haematoma during delivery, unspecified  |
| 15 | 43959  | 633Z.00 | Outcome of delivery NOS                                     |
| 16 | 70615  | L345z00 | Vulval and perineal haematoma during delivery NOS           |
| 17 | 60953  | Z253211 | Precipitate delivery                                        |
| 18 | 53572  | L3y..00 | Other specified complications of labour or delivery         |
| 19 | 9668   | 7F12100 | Elective lower uterine segment caesarean delivery           |
| 20 | 9791   | Z257.15 | ND - Normal delivery                                        |
| 21 | 9625   | L263300 | Labour and delivery complicated by fetal heart rate anomaly |
| 22 | 28861  | L398500 | Delivery by caesarean hysterectomy                          |
| 23 | 49733  | L388.00 | Cardiac comps of anaesthesia during labour and delivery     |
| 24 | 15480  | 14Y3.00 | Born by normal vaginal delivery                             |
| 25 | 98059  | Lyu5400 | [X]Other manipulation-assisted delivery                     |
| 26 | 69971  | Z253100 | Slow rate of delivery                                       |
| 27 | 61226  | ZV27y00 | [V]Other specified outcome of delivery                      |
| 28 | 105276 | 7F14000 | Breech extraction delivery with version                     |
| 29 | 103890 | 1514000 | Estimated date of delivery from last period                 |
| 30 | 101229 | Z255A00 | Observation of delivery push in labour                      |
| 31 | 50675  | L395100 | Forceps delivery - delivered                                |
| 32 | 44472  | L39y.00 | Other complications of labour and delivery                  |
| 33 | 48742  | Z254C00 | Face delivery                                               |
| 34 | 33884  | L213000 | Multiple delivery, all spontaneous                          |
| 35 | 14892  | 7F17z00 | Vacuum delivery NOS                                         |
| 36 | 64464  | 7F15z00 | Other breech delivery NOS                                   |
| 37 | 13163  | 62B..00 | Delivery booking place                                      |
| 38 | 105419 | 7F17000 | High vacuum delivery                                        |
| 39 | 8879   | 1514.12 | Estimated date of delivery                                  |
| 40 | 720    | L398.00 | Caesarean delivery                                          |
| 41 | 29885  | L3...00 | Complications occurring during labour and delivery          |
| 42 | 14727  | 14Y1.00 | Born by forceps delivery                                    |
| 43 | 15675  | 14Y5.00 | Born by ventouse delivery                                   |
| 44 | 167    | 7F19.00 | Normal delivery                                             |
| 45 | 32991  | 62C1.00 | Short stay delivery booking                                 |
| 46 | 688    | 7F17.11 | Ventouse delivery                                           |
| 47 | 463    | L222.12 | Breech delivery                                             |
| 48 | 6141   | L396.11 | Ventouse delivery                                           |
| 49 |        |         |                                                             |
| 50 |        |         |                                                             |
| 51 |        |         |                                                             |
| 52 |        |         |                                                             |
| 53 |        |         |                                                             |
| 54 |        |         |                                                             |
| 55 |        |         |                                                             |
| 56 |        |         |                                                             |
| 57 |        |         |                                                             |
| 58 |        |         |                                                             |
| 59 |        |         |                                                             |
| 60 |        |         |                                                             |

|    |        |         |                                                             |
|----|--------|---------|-------------------------------------------------------------|
| 1  |        |         |                                                             |
| 2  |        |         |                                                             |
| 3  |        |         |                                                             |
| 4  | 28903  | Z254200 | Delivered by low forceps delivery                           |
| 5  | 100597 | L39y100 | Other complications of labour and delivery - delivered      |
| 6  | 12014  | ZV27.00 | [V]Outcome of delivery                                      |
| 7  | 61259  | 7F12000 | Elective upper uterine segment caesarean delivery           |
| 8  |        |         |                                                             |
| 9  | 105032 | L143000 | Premature labour without delivery                           |
| 10 | 42885  | Z254.00 | Observation of pattern of delivery                          |
| 11 | 107557 | 63D7.00 | Complete placenta at delivery                               |
| 12 | 37254  | Q030.00 | Fetus or neonate affected by breech delivery and extraction |
| 13 | 3078   | Q032.00 | Fetus or neonate affected by forceps delivery               |
| 14 | 19600  | L341.00 | Second degree perineal tear during delivery                 |
| 15 | 39576  | L343.00 | Fourth degree perineal tear during delivery                 |
| 16 |        |         |                                                             |
| 17 | 31280  | L340500 | Vulval tear during delivery                                 |
| 18 | 25545  | Z212300 | Delivery place booked                                       |
| 19 |        |         |                                                             |
| 20 | 70242  | 7F16700 | Barton forceps cephalic delivery with rotation              |
| 21 | 71057  | L345100 | Vulval and perineal haematoma during delivery - delivered   |
| 22 | 1279   | 7F16.00 | Forceps cephalic delivery                                   |
| 23 |        |         |                                                             |
| 24 | 22976  | 62B2.00 | Home delivery booked                                        |
| 25 | 41414  | 62B6.00 | Delivery booking place changed                              |
| 26 |        |         |                                                             |
| 27 | 104873 | L143.00 | Premature labour and delivery                               |
| 28 | 50847  | L398600 | Caesarean delivery following previous Caesarean delivery    |
| 29 | 18287  | 7F22500 | Normal delivery of placenta                                 |
| 30 | 19604  | L342000 | Third degree perineal tear during delivery, unspecified     |
| 31 | 2943   | L222.11 | Assisted breech delivery                                    |
| 32 |        |         |                                                             |
| 33 | 96089  | Z253200 | Rapid rate of delivery                                      |
| 34 | 8967   | 7F19z00 | Normal delivery NOS                                         |
| 35 |        |         |                                                             |
| 36 | 51065  | 62CZ.00 | Delivery booking - stay NOS                                 |
| 37 | 33378  | 7F15.00 | Other breech delivery                                       |
| 38 | 53937  | L395000 | Forceps delivery unspecified                                |
| 39 | 90497  | L39z400 | Complications of labour and delivery NOS with p/n problem   |
| 40 | 23994  | 7F15100 | Assisted breech delivery                                    |
| 41 |        |         |                                                             |
| 42 | 60256  | Z254B00 | Brow delivery                                               |
| 43 | 60538  | L213100 | Multiple delivery, all by forceps and vacuum extractor      |
| 44 | 15926  | 7F15y00 | Other specified other breech delivery                       |
| 45 | 95780  | Z262600 | Complete placenta at delivery                               |
| 46 | 65702  | L38..00 | Complications of anaesthesia during labour and delivery     |
| 47 | 14686  | 7F16z00 | Forceps cephalic delivery NOS                               |
| 48 |        |         |                                                             |
| 49 | 67052  | L344100 | Unspecified perineal laceration during delivery - delivered |
| 50 | 15167  | L142.00 | Early onset of delivery                                     |
| 51 | 11194  | Z257.12 | Spontaneous vaginal delivery                                |
| 52 |        |         |                                                             |
| 53 | 25681  | Z257.13 | SVD - Spontaneous vaginal delivery                          |
| 54 | 9383   | Z257.11 | Normal delivery                                             |
| 55 | 17492  | Z257.14 | FTND - Full term normal delivery                            |
| 56 |        |         |                                                             |
| 57 | 31780  | L222.13 | Spontaneous breech delivery                                 |
| 58 | 22498  | Z253.12 | Rate of delivery                                            |
| 59 |        |         |                                                             |
| 60 | 52151  | Lyu4800 | [X]Labour+delivery complicat/oth evidence of fetal distress |

|    |        |         |                                                              |
|----|--------|---------|--------------------------------------------------------------|
| 1  |        |         |                                                              |
| 2  |        |         |                                                              |
| 3  |        |         |                                                              |
| 4  | 39319  | 8HE7.00 | Discharged from hospital within 6 hours of delivery          |
| 5  | 73048  | 7F14y00 | Other specified breech extraction delivery                   |
| 6  | 109452 | 7F1By00 | Other specified other operation to facilitate delivery       |
| 7  | 69920  | L39z.00 | Complications of labour and delivery NOS                     |
| 8  | 57652  | L343z00 | Fourth degree perineal tear during delivery NOS              |
| 9  | 53100  | 7F20z00 | Instrumental removal products of concep delivered uterus NOS |
| 10 | 41494  | 7F21z00 | Manual removal products of conception delivered uterus NOS   |
| 11 | 27800  | L124300 | Mild or unspecified pre-eclampsia - not delivered            |
| 12 | 41588  | L112200 | Placental abruption - not delivered                          |
| 13 | 3364   | L126300 | Eclampsia - not delivered                                    |
| 14 | 65759  | L244300 | Other uterine/pelvic floor abnormal - baby not yet delivered |
| 15 | 62880  | L110200 | Placenta praevia without haemorrhage - not delivered         |
| 16 | 69002  | L11y200 | Other antepartum haemorrhage - not delivered                 |
| 17 | 67447  | L125300 | Severe pre-eclampsia - not delivered                         |
| 18 | 64752  | L111200 | Placenta praevia with haemorrhage - not delivered            |
| 19 | 53160  | L127300 | Pre-eclampsia or eclampsia with hypertension - not delivered |
| 20 | 31617  | L130200 | Mild hyperemesis-not delivered                               |
| 21 | 57852  | L100200 | Threatened abortion - not delivered                          |
| 22 | 64298  | L141100 | Other threatened labour - not delivered                      |
| 23 | 54082  | L169300 | Herpes gestationis - not delivered                           |
| 24 | 48830  | L140100 | Threatened premature labour - not delivered                  |
| 25 | 54576  | Z252.00 | Mother not delivered                                         |
| 26 | 2549   | L222.00 | Breech presentation                                          |
| 27 | 13288  | 2722    | O/E - breech presentation                                    |
| 28 | 46298  | L222z00 | Breech presentation NOS                                      |
| 29 | 55359  | Q017100 | Fetus/neonate affected by breech presentation before labour  |
| 30 | 56867  | L300300 | Obstructed labour due to breech presentation                 |
| 31 | 66786  | L397z00 | Breech extraction NOS                                        |
| 32 | 48516  | Z254400 | Deliveries by breech extraction                              |
| 33 | 4955   | L397.00 | Breech extraction                                            |
| 34 | 66106  | L397000 | Breech extraction unspecified                                |
| 35 | 15610  | 7F06300 | External version of breech                                   |
| 36 | 1534   | 7F14100 | Forceps to aftercoming head (breech)                         |
| 37 | 66307  | L222000 | Breech presentation unspecified                              |
| 38 | 16097  | Q214z00 | Liveborn with unspecified fetal distress NOS                 |
| 39 | 33258  | L512.00 | Maternal care for diminished fetal movements                 |
| 40 | 67883  | L514.00 | Maternal care for poor fetal growth                          |
| 41 | 50733  | L263.12 | Fetal bradycardia                                            |
| 42 | 23009  | Q213.11 | Fetal distress in labour - liveborn                          |
| 43 | 48463  | Q410.00 | Fetal blood loss                                             |
| 44 | 23565  | L25..00 | Known or suspected fetal abnormality                         |
| 45 | 43428  | ZV28400 | [V]Screening for fetal growth retardation using ultrasonics  |
| 46 | 5479   | Q212.00 | Liveborn with prelabour fetal distress                       |
| 47 | 106201 | Qyu5400 | [X]Other specified fetal and neonatal haemorrhages           |
| 48 | 31481  | 7F04300 | Electrode applied to fetal scalp                             |
| 49 |        |         |                                                              |
| 50 |        |         |                                                              |
| 51 |        |         |                                                              |
| 52 |        |         |                                                              |
| 53 |        |         |                                                              |
| 54 |        |         |                                                              |
| 55 |        |         |                                                              |
| 56 |        |         |                                                              |
| 57 |        |         |                                                              |
| 58 |        |         |                                                              |
| 59 |        |         |                                                              |
| 60 |        |         |                                                              |

|    |        |         |                                                               |
|----|--------|---------|---------------------------------------------------------------|
| 1  |        |         |                                                               |
| 2  |        |         |                                                               |
| 3  |        |         |                                                               |
| 4  | 107512 | Q102.11 | Fetal malnutrition without mention of 'light for dates'       |
| 5  | 96711  | Q408200 | Escherichia coli intra-amniotic fetal infection               |
| 6  | 98261  | 7F27y00 | OS non routine obstetric scan for fetal observations          |
| 7  | 43893  | Q470.00 | Idiopathic hydrops fetalis                                    |
| 8  | 19590  | 62O1.00 | Fetal movements felt                                          |
| 9  | 48576  | L22y.00 | Other fetal malposition and malpresentation                   |
| 10 | 64959  | 7F01100 | Fetoscopic examination of fetus and sampling of fetal blood   |
| 11 | 36640  | L265300 | Maternal care for poor fetal growth                           |
| 12 | 59566  | Q41yz00 | Fetal or newborn haemorrhage NOS                              |
| 13 | 72837  | 2763    | O/E - fetal heart 40-80                                       |
| 14 | 62654  | 4H72.00 | Amniotic fetal cell abnormal                                  |
| 15 | 28977  | L237.00 | Other fetal abnormality causing disproportion                 |
| 16 | 46514  | L263700 | Maternal care for fetal hypoxia                               |
| 17 | 60301  | 7P0H500 | Fetal echocardiography                                        |
| 18 | 27801  | 2755    | O/E - fetal movement diminished                               |
| 19 | 67438  | Q40y000 | Intrauterine fetal sepsis, unspecified                        |
| 20 | 63905  | Lyu3A00 | [X]Maternal care/known or suspected fetal problem,unspecified |
| 21 | 46784  | Q023200 | Fetus/neonate affected by materno-fetal transplacental trans  |
| 22 | 50281  | Q213z00 | Liveborn with labour fetal distress NOS                       |
| 23 | 25153  | 2753    | O/E - fetal movements felt                                    |
| 24 | 103893 | 7F27400 | Fetal ascites scan                                            |
| 25 | 66619  | Q023011 | Fetus/neonate affected by feto-fetal transplacental transfus  |
| 26 | 101225 | BBK3400 | [M]Fetal rhabdomyoma                                          |
| 27 | 104765 | Q102.00 | Fetal malnutrition, no mention light or small for gest age    |
| 28 | 96669  | L22z.00 | Fetal malposition and malpresentation NOS                     |
| 29 | 55071  | Z271C00 | Fetal heart baseline pattern                                  |
| 30 | 22815  | 275..00 | O/E - fetal movements                                         |
| 31 | 69819  | 274Z.00 | O/E - fetal station NOS                                       |
| 32 | 56744  | Q10..11 | Fetal malnutrition                                            |
| 33 | 9164   | 584..11 | Fetal U-S scan                                                |
| 34 | 66175  | Q45z.00 | Fetal or newborn blood disorder NOS                           |
| 35 | 102019 | Q410600 | Fetal haemorrhage into mother's circulation                   |
| 36 | 104829 | L260000 | Fetal-maternal haemorrhage unspecified                        |
| 37 | 97471  | Q212z00 | Liveborn with prelabour fetal distress NOS                    |
| 38 | 100323 | 4H7..00 | Amniotic fetal cell study                                     |
| 39 | 73393  | 4H71.00 | Amniotic fetal cell study: NAD                                |
| 40 | 53296  | 42YG.00 | Fetal cell test                                               |
| 41 | 48798  | Q45..00 | Fetal and newborn blood disorders                             |
| 42 | 21893  | L510.00 | Maternal care for hydrops fetalis                             |
| 43 | 60774  | Z271100 | Fetal heart acceleration                                      |
| 44 | 62898  | 2768    | O/E - fetal heart 180-200                                     |
| 45 | 95881  | 2762    | O/E - fetal heart < 40                                        |
| 46 | 70856  | 2764    | O/E - fetal heart 80-100                                      |
| 47 | 67186  | 272Z.00 | O/E - fetal presentation NOS                                  |
| 48 | 38608  | L250.11 | Suspect fetal anencephaly                                     |
| 49 |        |         |                                                               |
| 50 |        |         |                                                               |
| 51 |        |         |                                                               |
| 52 |        |         |                                                               |
| 53 |        |         |                                                               |
| 54 |        |         |                                                               |
| 55 |        |         |                                                               |
| 56 |        |         |                                                               |
| 57 |        |         |                                                               |
| 58 |        |         |                                                               |
| 59 |        |         |                                                               |
| 60 |        |         |                                                               |

|    |        |         |                                                             |
|----|--------|---------|-------------------------------------------------------------|
| 1  |        |         |                                                             |
| 2  |        |         |                                                             |
| 3  | 8846   | L250.13 | Suspect fetal spina bifida                                  |
| 4  | 55152  | Q408.00 | Intra-amniotic fetal infection                              |
| 5  | 104218 | L300000 | Obstructed labour due to fetal malposition unspecified      |
| 6  | 99494  | Q455000 | Congenital anaemia from fetal blood loss                    |
| 7  | 91908  | 7F27200 | Fetal biometry                                              |
| 8  | 95754  | Q408z00 | Intra-amniotic fetal infection NOS                          |
| 9  | 62629  | Q41yy00 | Other specified fetal or newborn haemorrhage                |
| 10 | 95064  | Q41y.00 | Other fetal and newborn haemorrhage                         |
| 11 | 19575  | Q10z.00 | Fetal growth retardation NOS                                |
| 12 | 31033  | 7F03100 | Percutaneous insertion of fetal pleuroamniotic shunt        |
| 13 | 53241  | Q214100 | Liveborn with fetal hypoxia, unspecified                    |
| 14 | 26707  | 2766    | O/E - fetal heart 120-160                                   |
| 15 | 38846  | Z271D00 | Normal fetal heart baseline pattern                         |
| 16 | 44071  | Q479.00 | Non-immune hydrops fetalis                                  |
| 17 | 64335  | L263000 | Fetal distress unspecified                                  |
| 18 | 23590  | L300.00 | Obstructed labour due to fetal malposition                  |
| 19 | 102073 | Q410z00 | Fetal blood loss NOS                                        |
| 20 | 53687  | 2752    | O/E - fetal movements seen                                  |
| 21 | 42093  | 5846    | U-S scan - fetal maturity                                   |
| 22 | 3620   | Q214.00 | Liveborn with fetal distress, unspecified                   |
| 23 | 63024  | 2726    | O/E -fetal presentation unsure                              |
| 24 | 104845 | Q410700 | Fetal exsanguination                                        |
| 25 | 59679  | 276Z.00 | O/E - fetal heart NOS                                       |
| 26 | 100297 | L22zz00 | Fetal malposition and malpresentation NOS                   |
| 27 | 34777  | Q10..00 | Slow fetal growth and fetal malnutrition                    |
| 28 | 98499  | L25z300 | Maternal care for suspect fetal abnormal and damage, unspec |
| 29 | 96222  | L25z400 | Maternal care for fetal abnormality and damage, unspecified |
| 30 | 41908  | Q3z..00 | Fetal or newborn respiratory problems NOS                   |
| 31 | 28184  | Q436z00 | Unspecified fetal or neonatal jaundice NOS                  |
| 32 | 11589  | 7F25100 | Fetal heart monitoring in labour                            |
| 33 | 35680  | Q423.00 | Hydrops fetalis due to isoimmunisation                      |
| 34 | 45439  | Lyu3900 | [X]Maternal care/oth spcf known or suspected fetal problems |
| 35 | 12013  | L268000 | Reduced fetal movements                                     |
| 36 | 19581  | Q436.00 | Fetal and neonatal jaundice, unspecified                    |
| 37 | 32184  | L267500 | Other fetal problems                                        |
| 38 | 68996  | 2765    | O/E - fetal heart 100-120                                   |
| 39 | 62903  | 2767    | O/E - fetal heart 160-180                                   |
| 40 | 70845  | Z271E00 | Sinusoidal pattern of fetal heart                           |
| 41 | 52308  | Q211.00 | Fetal death due to labour anoxia                            |
| 42 | 101119 | 2769    | O/E - fetal heart > 200                                     |
| 43 | 27868  | 2761    | O/E - fetal heart not heard                                 |
| 44 | 39218  | 5858200 | Ultrasonic doppler for fetal heart sounds                   |
| 45 | 2437   | 2751    | O/E - no fetal movements                                    |
| 46 | 13276  | L263.00 | Fetal distress - affecting management                       |
| 47 | 49294  | L26..00 | Other fetal and placental problems                          |
| 48 |        |         |                                                             |
| 49 |        |         |                                                             |
| 50 |        |         |                                                             |
| 51 |        |         |                                                             |
| 52 |        |         |                                                             |
| 53 |        |         |                                                             |
| 54 |        |         |                                                             |
| 55 |        |         |                                                             |
| 56 |        |         |                                                             |
| 57 |        |         |                                                             |
| 58 |        |         |                                                             |
| 59 |        |         |                                                             |
| 60 |        |         |                                                             |

|    |        |         |                                                             |
|----|--------|---------|-------------------------------------------------------------|
| 1  |        |         |                                                             |
| 2  |        |         |                                                             |
| 3  |        |         |                                                             |
| 4  | 41919  | 5849    | U-S scan - fetal presentation                               |
| 5  | 72159  | 5845    | U-S scan - fetal cephalometry                               |
| 6  | 91933  | Q410000 | Fetal blood loss, unspecified                               |
| 7  | 85992  | 7F27.00 | Non routine obstetric scan for fetal observations           |
| 8  | 95538  | Z271B00 | Poor baseline variability in fetal heart rate               |
| 9  | 36195  | L268.00 | Other fetal problems                                        |
| 10 | 8147   | L264.11 | Fetal death in utero                                        |
| 11 | 94785  | 9Nk3.00 | Seen in fetal medicine clinic                               |
| 12 | 91477  | 7F03300 | Percutaneous insertion of fetal pleural drain               |
| 13 | 19720  | 7F25.11 | Fetal monitoring                                            |
| 14 | 983    | Q....11 | Fetal and neonatal conditions                               |
| 15 | 26710  | 272..00 | O/E - fetal presentation                                    |
| 16 | 45963  | 5847    | U-S scan - fetal abnormality                                |
| 17 | 46413  | L250.12 | Suspect fetal hydrocephaly                                  |
| 18 | 48801  | Q41..00 | Fetal and neonatal haemorrhage                              |
| 19 | 95875  | 7F27z00 | Non routine obstetric scan for fetal observations NOS       |
| 20 | 39868  | Q420.11 | Erythroblastosis fetalis                                    |
| 21 | 50201  | Q31..00 | Other fetal and newborn respiratory conditions              |
| 22 | 55607  | Z271900 | Fetal heart rate variability                                |
| 23 | 47149  | Z271F00 | Fetal heart deceleration                                    |
| 24 | 102894 | L260z00 | Fetal-maternal haemorrhage NOS                              |
| 25 | 91773  | Z271A00 | Good baseline variability in fetal heart rate               |
| 26 | 46502  | Q21..12 | Labour fetal anoxia                                         |
| 27 | 46431  | 7F04100 | Percutaneous sampling of fetal blood                        |
| 28 | 9501   | 7F25000 | Fetal heart monitoring NEC                                  |
| 29 | 19582  | Q493.00 | Persistent fetal circulation                                |
| 30 | 7681   | 276..00 | O/E - fetal heart heard                                     |
| 31 | 62316  | L51..00 | Maternal care for other known or suspected fetal problems   |
| 32 | 53420  | L263.13 | Fetal tachycardia                                           |
| 33 | 54004  | 7F03000 | Percutaneous insertion of fetal vesicoamniotic shunt        |
| 34 | 34132  | Q212.11 | Fetal distress before labour - liveborn                     |
| 35 | 42322  | Q213.00 | Liveborn with labour fetal distress                         |
| 36 | 20320  | Q210.00 | Fetal death due to prelabour anoxia                         |
| 37 | 107794 | 4H7Z.00 | Amniotic fetal cell study NOS                               |
| 38 | 106136 | Q410200 | Fetal placental blood loss                                  |
| 39 | 66335  | L260.00 | Fetal-maternal haemorrhage                                  |
| 40 | 53863  | L263z00 | Fetal distress NOS                                          |
| 41 | 41102  | L263500 | Lab+del comp fetal ht rate anom wth meconium in amnio fluid |
| 42 | 35214  | Z271912 | FHRV - Fetal heart rate variability                         |
| 43 | 26401  | Q214.11 | Fetal distress, unspecified when, liveborn                  |
| 44 | 54687  | L51X.00 | Maternal care/known or suspected fetal problem,unspecifd    |
| 45 | 37752  | 62O3.00 | Fetal maturity: dates = size                                |
| 46 | 55493  | 62O2.00 | Fetal movements seen                                        |
| 47 | 52857  | 275Z.00 | O/E - fetal movements NOS                                   |
| 48 | 110134 | Z271G00 | Early fetal heart deceleration                              |
| 49 |        |         |                                                             |
| 50 |        |         |                                                             |
| 51 |        |         |                                                             |
| 52 |        |         |                                                             |
| 53 |        |         |                                                             |
| 54 |        |         |                                                             |
| 55 |        |         |                                                             |
| 56 |        |         |                                                             |
| 57 |        |         |                                                             |
| 58 |        |         |                                                             |
| 59 |        |         |                                                             |
| 60 |        |         |                                                             |

|    |        |         |                                                              |
|----|--------|---------|--------------------------------------------------------------|
| 1  |        |         |                                                              |
| 2  |        |         |                                                              |
| 3  |        |         |                                                              |
| 4  | 13299  | Q42X.00 | Hydrops fetalis due to other+unspcfd haemolytic disease      |
| 5  | 100342 | PK81.00 | Fetal hydantoin syndrome                                     |
| 6  | 50913  | P7z..11 | Fetal circulation                                            |
| 7  | 51372  | Q311z11 | Pneumonitis due to fetal aspiration                          |
| 8  | 97985  | Z271H00 | Late fetal heart deceleration                                |
| 9  | 95649  | L263.11 | Fetal acidosis                                               |
| 10 | 48784  | 62O4.00 | Fetal maturity: dates not=size                               |
| 11 | 66428  | Q026.11 | Fetus affected by cord problems                              |
| 12 | 1017   | Q034.00 | Fetus or neonate affected by caesarean section               |
| 13 | 97885  | 7F01000 | Fetoscopic examination of fetus and biopsy of fetus          |
| 14 | 47151  | L220.00 | Fetus - unstable lie                                         |
| 15 | 97186  | 7F03z00 | Therapeutic percutaneous operation on fetus NOS              |
| 16 | 26685  | Q035600 | Fetus/neonate affected by other maternal opiates in lab/del  |
| 17 | 62776  | Q037.11 | Fetus or neonate affected by hypertonic labour               |
| 18 | 5538   | Q024.00 | Fetus or neonate affected by prolapsed cord                  |
| 19 | 91659  | Q022.00 | Fetus/neonate affected by placental abnormality NEC          |
| 20 | 105625 | Q027.00 | Fetus or neonate affected by chorioamnionitis                |
| 21 | 72118  | L257.00 | Fetus with damage due to intra-uterine contraceptive device  |
| 22 | 52007  | L255.00 | Fetus with drug damage                                       |
| 23 | 73892  | Q00z.00 | Fetus or neonate affected by maternal medical problem NOS    |
| 24 | 67326  | Q04X.00 | Fetus+newborn affected/other maternal noxious influences     |
| 25 | 69257  | L25y000 | Fetus with other damage NEC, unspecified                     |
| 26 | 71987  | Q007A00 | Fetus/neonate affect-plac./breast transf hypoglycaemic agent |
| 27 | 63290  | Q101.00 | Fetus small-for-dates with signs of malnutrition             |
| 28 | 52669  | Q031200 | Fetus/neonate affect persistent occip-posterior - labour/del |
| 29 | 61063  | L25zz00 | Fetus with damage NOS                                        |
| 30 | 99136  | Q021200 | Fetus/neonate affected by placental damage-amniocentesis     |
| 31 | 45440  | 7F00.00 | Therapeutic fetoscopic operations on fetus                   |
| 32 | 30979  | 7N61200 | [SO]Fetus                                                    |
| 33 | 69435  | 7F02z00 | Selective destruction of fetus NOS                           |
| 34 | 61452  | 7F0z.00 | Fetus and gravid uterus operations NOS                       |
| 35 | 46724  | Q022200 | Fetus or neonate affected by placental insufficiency         |
| 36 | 105097 | L250300 | Maternal care for suspected CNS malformation in fetus        |
| 37 | 52633  | Q021111 | Fetus affected by placental abruption                        |
| 38 | 36894  | Q100.11 | Fetus small-for-dates (SFD), without mention of malnutrition |
| 39 | 94808  | Q017600 | Fetus or neonate affected by face presentation before labour |
| 40 | 103741 | 7F2A211 | Doppler ultrasound scan of middle cerebral artery of fetus   |
| 41 | 51177  | L5...00 | Maternal care for fetus                                      |
| 42 | 106508 | 7F03600 | Percutaneous laser ablation of lesion of fetus               |
| 43 | 44173  | 5391    | Obstetric X-ray - fetus                                      |
| 44 | 38864  | L160.00 | Papyraceous fetus                                            |
| 45 | 48156  | Q025000 | Fetus or neonate affected by cord round neck                 |
| 46 | 59236  | L25z.00 | Fetus with damage NOS                                        |
| 47 | 53074  | L251z00 | Fetus with chromosomal abnormality NOS                       |
| 48 | 66699  | PK83.00 | Fetus and newborn affected by maternal use of alcohol        |
| 49 |        |         |                                                              |
| 50 |        |         |                                                              |
| 51 |        |         |                                                              |
| 52 |        |         |                                                              |
| 53 |        |         |                                                              |
| 54 |        |         |                                                              |
| 55 |        |         |                                                              |
| 56 |        |         |                                                              |
| 57 |        |         |                                                              |
| 58 |        |         |                                                              |
| 59 |        |         |                                                              |
| 60 |        |         |                                                              |



|    |        |         |                                                              |
|----|--------|---------|--------------------------------------------------------------|
| 1  |        |         |                                                              |
| 2  |        |         |                                                              |
| 3  |        |         |                                                              |
| 4  | 66571  | Qyu5200 | [X]Oth intracranial(nontraumatic)haemorrhages/fetus+newborn  |
| 5  | 31923  | Q021300 | Fetus/neonate affected by placental damage-caesarean section |
| 6  | 72366  | 7F02y00 | Other specified selective destruction of fetus               |
| 7  | 62819  | 7F04z00 | Diagnostic percutaneous examination of fetus NOS             |
| 8  | 72973  | Qyu5500 | [X]Other haemolytic diseases of fetus and newborn            |
| 9  | 45653  | Q025.00 | Fetus or neonate affected by other cord compression          |
| 10 | 23483  | Q023.00 | Fetus or neonate affected by placental transfusion syndrome  |
| 11 | 97240  | Q027100 | Fetus or neonate affected by amnionitis                      |
| 12 | 72834  | Q41z.00 | Haemorrhage of fetus and newborn NOS                         |
| 13 | 52950  | Q013.00 | Fetus or neonate affected by maternal polyhydramnios         |
| 14 | 41937  | 5848    | U-S scan - multiple fetus                                    |
| 15 | 63077  | Q00y.00 | Fetus or neonate affected by other maternal condition        |
| 16 | 34695  | L22..11 | Malpresentation of fetus                                     |
| 17 | 15495  | Q42z.00 | Haemolytic disease of fetus/newborn due isoimmunisation NOS  |
| 18 | 22032  | Q100.00 | Fetus small-for-dates, without mention of malnutrition       |
| 19 | 43005  | Q200012 | Intracranial haemorrhage in fetus or newborn                 |
| 20 | 36559  | Q200011 | Intracerebral haemorrhage in fetus or newborn                |
| 21 | 71279  | L250000 | Fetus with central nervous system malformation unspecified   |
| 22 | 40870  | Q020.00 | Fetus or neonate affected by placenta previa                 |
| 23 | 85238  | Qyu5F00 | [X]Intracranial nontraumatic haemorrhage fetus newborn unsp  |
| 24 | 106959 | Qyu0200 | [X]Fetus and newborn affected by other maternal conditions   |
| 25 | 46283  | 7F0..00 | Fetus and gravid uterus operations                           |
| 26 | 682    | Q42..00 | Haemolytic disease of fetus/newborn due to isoimmunisation   |
| 27 | 27334  | Q026z00 | Fetus or neonate affected by cord problems NOS               |
| 28 | 50530  | 7F0y.00 | Other specified operations on fetus or gravid uterus         |
| 29 | 28487  | Q....13 | Fetus and neonate conditions                                 |
| 30 | 71910  | Q037200 | Fetus or neonate affected by hypertonic uterine dysfunction  |
| 31 | 70737  | L25z000 | Fetus with damage NOS, unspecified                           |
| 32 | 56697  | Q041.00 | Fetus and newborn affect by mat use of nutritional chem subs |
| 33 | 54726  | L251400 | Maternal care for chromosomal abnormality in fetus           |
| 34 | 101599 | L253300 | Maternal care for damage to fetus from maternal rubella      |
| 35 | 101893 | L251300 | Maternal care for suspected chromosomal abnormality in fetus |
| 36 | 66526  | Q035200 | Fetus/neonate affected by mat general anaesthesia - lab/del  |
| 37 | 99890  | Q021400 | Fetus/neonate affect by placental damage-surgical induction  |
| 38 | 44479  | Q200511 | Intracerebral haematoma in fetus or newborn                  |
| 39 | 47219  | Q035300 | Fetus/neonate affected by mat epidural anaesth - labour/del  |
| 40 | 52526  | Q200600 | Extradural haemorrhage in fetus or newborn                   |
| 41 | 105735 | Q007B00 | Fetus/neonate affected-plac./breast transfer endocrine agent |
| 42 | 21382  | 27B..00 | O/E - viable fetus                                           |
| 43 | 100241 | L25y.00 | Fetus with other damage NEC                                  |
| 44 | 26840  | Q017500 | Fetus or neonate affected by unstable lie before labour      |
| 45 | 95128  | 9d06.00 | Fetus                                                        |
| 46 | 26631  | Q000.00 | Fetus or neonate affected by maternal hypertensive disease   |
| 47 | 73317  | L252.00 | Fetus with hereditary disease                                |
| 48 | 48583  | Q031600 | Fetus/neonate affected by disproportion during labour/delive |
| 49 |        |         |                                                              |
| 50 |        |         |                                                              |
| 51 |        |         |                                                              |
| 52 |        |         |                                                              |
| 53 |        |         |                                                              |
| 54 |        |         |                                                              |
| 55 |        |         |                                                              |
| 56 |        |         |                                                              |
| 57 |        |         |                                                              |
| 58 |        |         |                                                              |
| 59 |        |         |                                                              |
| 60 |        |         |                                                              |

|    |        |         |                                                              |
|----|--------|---------|--------------------------------------------------------------|
| 1  |        |         |                                                              |
| 2  |        |         |                                                              |
| 3  |        |         |                                                              |
| 4  | 71637  | Q017.11 | Fetus affected by malpresentation                            |
| 5  | 71495  | L250z00 | Fetus with central nervous system malformation NOS           |
| 6  | 60841  | Q013.11 | Fetus affected by hydramnios                                 |
| 7  | 55149  | Qyu0100 | [X]Fetus+newborn affectd/oth medical procedure on mother,NEC |
| 8  | 100666 | L252z00 | Fetus with hereditary disease NOS                            |
| 9  | 66748  | Qyu0C00 | [X]Fetus+newborn affected/other maternal noxious influences  |
| 10 | 43958  | Q023000 | Fetus/neonate affected by twin-to-twin transplacental transf |
| 11 | 23617  | L22..00 | Malposition and malpresentation of fetus                     |
| 12 | 68016  | L253.11 | Fetus with suspected rubella damage via mother               |
| 13 | 65716  | Q011.00 | Fetus/neonate affected maternal premature rupture membrane   |
| 14 | 20721  | 7F0..11 | Fetus operations                                             |
| 15 | 59580  | 7F0..12 | Fetus & gravid uterus ops                                    |
| 16 | 72558  | Q016.00 | Fetus or neonate affected by maternal death                  |
| 17 | 38043  | Q200500 | Cerebral haematoma in fetus or newborn                       |
| 18 | 52299  | Q007200 | Fetus/neonate affected by placental/breast transfer narcotic |
| 19 | 68169  | Q021.00 | Fetus/neonate affect other placental separation/haemorrhage  |
| 20 | 37055  | Q035500 | Fetus/neonate affected by maternal pethidine in labour/deliv |
| 21 | 16963  | 7F00000 | Fetoscopic blood transfusion of fetus                        |
| 22 | 61596  | Q017300 | Fetus or neonate affected by oblique lie before labour       |
| 23 | 55761  | Q021500 | Fetus or neonate affected by premature placental separation  |
| 24 | 44644  | L250.00 | Fetus with central nervous system malformation               |
| 25 | 58187  | Lyu4500 | [X]Obstructed labour due to other abnormalities of fetus     |
| 26 | 108080 | Qyu0.00 | [X]Fetus/newborn affected by maternal factors+complications  |
| 27 | 91434  | L251.12 | Suspect mongol fetus                                         |
| 28 | 42661  | Q021011 | Fetus affected by APH - antepartum haemorrhage               |
| 29 | 63309  | Q037312 | Fetus/neonate affected by uterine dysfunction in labour/del  |
| 30 | 95638  | Q101.11 | Fetus small-for-dates (SFD) with signs of malnutrition       |
| 31 | 69015  | L251.11 | Suspect cystic fibrosis fetus                                |
| 32 | 64430  | Q007C00 | Fetus/neonate affected-plac./breast transfer addictive drug  |
| 33 | 59171  | Q017400 | Fetus or neonate affected by transverse lie before labour    |
| 34 | 57828  | 7F03200 | Percutaneous blood transfusion of fetus                      |
| 35 | 24701  | 2754    | O/E - fetus very active                                      |
| 36 | 72833  | Q02z.00 | Fetus/neonate affected by abnormalities chorion/amnion NOS   |
| 37 | 104029 | Qyu0B00 | [X]Fetus and newborn affected by other maternal medication   |
| 38 | 70901  | Q023100 | Fetus/neonate affected by feto-maternal transplacental trans |
| 39 | 7103   | Q000.11 | Fetus affected by maternal toxemia                           |
| 40 | 109421 | Q03y400 | Fetus or neonate affected by long labour                     |
| 41 | 20544  | Q031611 | Fetus/neonate affected-cephalopelvic disproportion lab./del. |
| 42 | 99563  | 27A..11 | O/E - VE - descent of fetus                                  |
| 43 | 50555  | Q012.00 | Fetus or neonate affected by maternal oligohydramnios        |
| 44 | 101603 | Q010.00 | Fetus or neonate affected by maternal incompetent cervix     |
| 45 | 72348  | Q007800 | Fetus/neonate affected-plac./breast transfer chemotherapy    |
| 46 | 30692  | L251.00 | Fetus with chromosomal abnormality                           |
| 47 | 45856  | Q002.00 | Fetus or neonate affected by maternal infections             |
| 48 | 49959  | Q005.00 | Fetus or neonate affected by maternal injury                 |
| 49 |        |         |                                                              |
| 50 |        |         |                                                              |
| 51 |        |         |                                                              |
| 52 |        |         |                                                              |
| 53 |        |         |                                                              |
| 54 |        |         |                                                              |
| 55 |        |         |                                                              |
| 56 |        |         |                                                              |
| 57 |        |         |                                                              |
| 58 |        |         |                                                              |
| 59 |        |         |                                                              |
| 60 |        |         |                                                              |

|    |        |         |                                                              |
|----|--------|---------|--------------------------------------------------------------|
| 1  |        |         |                                                              |
| 2  |        |         |                                                              |
| 3  |        |         |                                                              |
| 4  | 93329  | Q007400 | Fetus/neonate affected-placental/breast transfer anti-infect |
| 5  | 72729  | L253.00 | Fetus with viral damage via mother                           |
| 6  | 63648  | Q021000 | Fetus/neonate affected by antepartum haemorrhage unspecified |
| 7  | 96742  | Q007300 | Fetus/neonate affected-placenta/breast transfer hallucinogen |
| 8  | 68851  | Q00..00 | Fetus or neonate affected by maternal medical problems       |
| 9  | 54690  | L250400 | Maternal care for CNS malformation in fetus                  |
| 10 | 108565 | Qyu0700 | [X]Fetus+newborn affectd/oth+unspcfd conditns/umbilical cord |
| 11 | 108626 | Qyu7.00 | [X]Digestive system disorders of fetus and newborn           |
| 12 | 38660  | Q3...00 | Fetus and newborn respiratory conditions                     |
| 13 | 42226  | Q017200 | Fetus or neonate affected by external version before labour  |
| 14 | 71951  | Q037300 | Fetus or neonate affected by uterine inertia or dysfunction  |
| 15 | 71552  | L235.00 | Large fetus causing disproportion                            |
| 16 | 67572  | Q031000 | Fetus/neonate affected by mat bony pelvis abn in labour/del  |
| 17 | 65059  | Qyu5.00 | [X]Haemorrhagic+haematolog disorders of fetus and newborn    |
| 18 | 68687  | L266300 | Suspected macroscopic fetus                                  |
| 19 | 52726  | Q031500 | Fetus/neonate affected by face presentation during labour/de |
| 20 | 27447  | Q031z00 | Fetus/neonate affected by malposition/disproportion NOS      |
| 21 | 54311  | Q02..00 | Fetus/neonate affected by complic of placenta/cord/membrane  |
| 22 | 100074 | 7F01.00 | Diagnostic endoscopic examination of fetus using fetoscope   |
| 23 | 101984 | 7F03.00 | Therapeutic percutaneous operations on fetus                 |
| 24 | 70393  | 7F04.00 | Diagnostic percutaneous examination of fetus                 |
| 25 | 102078 | Q027z00 | Fetus or neonate affected by chorioamnionitis                |
| 26 | 58773  | Q026.00 | Fetus or neonate affected by other specified cord problems   |
| 27 | 102535 | 7F00.12 | Therapeutic foetoscopic operations on fetus                  |
| 28 | 35777  | Q417.00 | Intracranial nontraumatic haemorrhage of fetus and newborn   |
| 29 | 31496  | Q007900 | Fetus/neonate affected-plac./breast transfer uterine depress |
| 30 | 107153 | Q007x00 | Fetus/neonate affected - placental/breast transfer toxic NEC |
| 31 | 40376  | PH11.00 | Harlequin fetus                                              |
| 32 | 56666  | L256.00 | Fetus with radiation damage                                  |
| 33 | 73323  | L254.00 | Fetus with damage due to other maternal disease              |
| 34 | 73373  | Q001.00 | Fetus or neonate affected by maternal renal/urinary disease  |
| 35 | 96331  | L258.00 | Fetus with cardiovascular abnormality                        |
| 36 | 105261 | Q007500 | Fetus/neonate affected-placental/breast transfer immune sera |
| 37 | 57651  | 7F02.00 | Selective destruction of fetus                               |
| 38 | 97611  | 7F03400 | Percutaneous insertion of bladder drain to fetus             |
| 39 | 108731 | 7F03y00 | Other specified therapeutic percutaneous operation on fetus  |
| 40 | 70074  | Q3y..00 | Other specified respiratory problems in fetus or neonate     |
| 41 | 69814  | Q022000 | Fetus or neonate affected by placental dysfunction           |
| 42 | 69533  | L257.12 | Fetus with damage due to intra-uterine contraceptive device  |
| 43 | 95909  | Q026400 | Fetus or neonate affected by vasa praevia of cord            |
| 44 | 55410  | L251000 | Fetus with chromosomal abnormality unspecified               |
| 45 | 37180  | 272..11 | O/E - lie of fetus                                           |
| 46 | 69076  | Q031300 | Fetus/neonate affected by shoulder presentation - labour/del |
| 47 | 61640  | L252000 | Fetus with hereditary disease unspecified                    |
| 48 | 96614  | Q035100 | Fetus/neonate affected by mat analgesic agent in labour/del  |
| 49 |        |         |                                                              |
| 50 |        |         |                                                              |
| 51 |        |         |                                                              |
| 52 |        |         |                                                              |
| 53 |        |         |                                                              |
| 54 |        |         |                                                              |
| 55 |        |         |                                                              |
| 56 |        |         |                                                              |
| 57 |        |         |                                                              |
| 58 |        |         |                                                              |
| 59 |        |         |                                                              |
| 60 |        |         |                                                              |

|    |        |         |                                                              |
|----|--------|---------|--------------------------------------------------------------|
| 1  |        |         |                                                              |
| 2  |        |         |                                                              |
| 3  |        |         |                                                              |
| 4  | 42213  | Q021100 | Fetus or neonate affected by abruptio placentae              |
| 5  | 104989 | Q018.00 | Fetus or neonate affected by maternal postnatal depression   |
| 6  | 70739  | L25yz00 | Fetus with other damage NEC NOS                              |
| 7  | 42384  | Q031400 | Fetus or neonate affected by transverse lie in labour/deliv  |
| 8  | 72757  | Q007100 | Fetus/neonate affected by placental/breast transfer alcohol  |
| 9  | 51296  | Q03y200 | Fetus or neonate affected by induction of labour             |
| 10 | 111265 | Qyu6.00 | [X]Transitory endocr & metab disord specif to fetus/newborn  |
| 11 | 59070  | Q037.00 | Fetus or neonate affected by abnormal uterine contractions   |
| 12 | 97745  | Q007600 | Fetus/neonate affected-plac./breast transfer anticonvulsant  |
| 13 | 27670  | L255300 | Maternal care for (suspected) damage to fetus from alcohol   |
| 14 | 92824  | Q031z11 | Fetus or neonate affected by obstructed labour NEC           |
| 15 | 99473  | Q007.00 | Fetus/neonate affected by poison transferred placenta/breast |
| 16 | 50940  | 5391.11 | Fetus - abdominal X-ray, obst.                               |
| 17 | 72836  | Q007w00 | Fetus/neonate affected-placenta/breast transfer medicine NEC |
| 18 | 97923  | Q025200 | Fetus or neonate affected by knot in cord                    |
| 19 | 68577  | Q037100 | Fetus or neonate affected by hypertonic labour               |
| 20 | 70165  | Q016.11 | Fetus affected by maternal death                             |
| 21 | 107075 | L043z11 | Unspecified inevitable miscarriage without complication      |
| 22 | 94976  | L044x11 | Incomplete inevitable miscarriage with unspecified comp      |
| 23 | 17625  | L044.11 | Inevitable miscarriage incomp                                |
| 24 | 55404  | L045z11 | Complete inevitable miscarriage without complication         |
| 25 | 12241  | L02..11 | Missed miscarriage                                           |
| 26 | 107604 | L045211 | Complete inevitable miscarriage complicated by embolism      |
| 27 | 53836  | L044z11 | Incomplete inevitable miscarriage without complication       |
| 28 | 96949  | L02..12 | Silent miscarriage                                           |
| 29 | 11323  | L045.11 | Inevitable miscarriage complete                              |
| 30 | 108742 | L045x11 | Complete inevitable miscarriage with unspecified comp        |
| 31 | 109228 | L043y11 | Unspecified inevitable miscarriage with OS complication      |
| 32 | 11234  | L043.11 | Inevitable miscarriage unspecified                           |
| 33 | 92284  | L044y11 | Incomplete inevitable miscarriage with other specified comp  |
| 34 | 48603  | L040900 | Inevitable miscarriage                                       |
| 35 | 99578  | L043x11 | Unspecified inevitable miscarriage with unspec complication  |
| 36 | 165    | L04..11 | Miscarriage                                                  |
| 37 | 57576  | L045y11 | Complete inevitable miscarriage with OS complication         |
| 38 | 3082   | L04..00 | Spontaneous abortion                                         |
| 39 | 2187   | L05..00 | Legally induced abortion                                     |
| 40 | 68740  | L041x00 | Incomplete spontaneous abortion with complication NOS        |
| 41 | 63778  | L042x00 | Complete spontaneous abortion with complication NOS          |
| 42 | 69183  | L052100 | Complete legal abortion with delayed/excessive haemorrhage   |
| 43 | 102820 | L050200 | Unspecified legal abortion + damage to pelvic organs/tissues |
| 44 | 41098  | L050x00 | Unspecified legal abortion with complication NOS             |
| 45 | 106524 | L071100 | Unspecified incomplete abortion + delayed/excess haemorrhage |
| 46 | 25883  | L071y00 | Unspecified incomplete abortion + no mention of complication |
| 47 | 99736  | L042000 | Complete spontaneous abortion + genital tract/pelvic infect  |
| 48 | 99590  | L052w00 | Complete legal abortion with other specified complication    |
| 49 |        |         |                                                              |
| 50 |        |         |                                                              |
| 51 |        |         |                                                              |
| 52 |        |         |                                                              |
| 53 |        |         |                                                              |
| 54 |        |         |                                                              |
| 55 |        |         |                                                              |
| 56 |        |         |                                                              |
| 57 |        |         |                                                              |
| 58 |        |         |                                                              |
| 59 |        |         |                                                              |
| 60 |        |         |                                                              |

|    |        |         |                                                              |
|----|--------|---------|--------------------------------------------------------------|
| 1  |        |         |                                                              |
| 2  |        |         |                                                              |
| 3  | 69190  | L052000 | Complete legal abortion + genital tract or pelvic infection  |
| 4  | 3874   | L031200 | Tubal abortion                                               |
| 5  | 56325  | L042y00 | Complete spontaneous abortion + no mention of complication   |
| 6  | 99955  | L040400 | Unspecified spontaneous abortion with metabolic disorder     |
| 7  | 60771  | L05..11 | Elective abortion                                            |
| 8  | 31431  | L05..13 | Therapeutic abortion                                         |
| 9  | 95625  | L044200 | Incomplete inevitable abortion complicated by embolism       |
| 10 | 40258  | L040011 | Spontaneous abortion with sepsis                             |
| 11 | 72593  | L044x00 | Incomplete inevitable abortion with unspecified complication |
| 12 | 49467  | L06..12 | Self-induced abortion                                        |
| 13 | 71289  | L06..11 | Criminal abortion                                            |
| 14 | 25605  | L100z00 | Threatened abortion NOS                                      |
| 15 | 58137  | L07z.00 | Unspecified abortion NOS                                     |
| 16 | 1886   | L072.00 | Unspecified abortion complete                                |
| 17 | 70643  | L070.00 | Unspecified abortion                                         |
| 18 | 56828  | L041w00 | Incomp spontaneous abortion + other specified complication   |
| 19 | 28605  | L051z00 | Incomplete legal abortion NOS                                |
| 20 | 38415  | L050z00 | Unspecified legal abortion NOS                               |
| 21 | 97991  | L062w00 | Complete illegal abortion with other specified complication  |
| 22 | 2034   | L10zz11 | Inevitable abortion                                          |
| 23 | 56224  | L070z00 | Unspecified abortion NOS                                     |
| 24 | 94404  | L061z00 | Incomplete illegal abortion NOS                              |
| 25 | 104747 | L040x00 | Unspecified spontaneous abortion with complication NOS       |
| 26 | 8173   | L043.00 | Inevitable abortion unspecified                              |
| 27 | 105470 | L040500 | Unspecified spontaneous abortion with shock                  |
| 28 | 102090 | L08y.00 | Failed attempted abortion with no mention of complication    |
| 29 | 68311  | L044y00 | Incomplete inevitable abortion with OS complication          |
| 30 | 9407   | 6776.11 | Abortion counselling                                         |
| 31 | 33501  | L045.00 | Inevitable abortion complete                                 |
| 32 | 1737   | L02..00 | Missed abortion                                              |
| 33 | 41606  | L06..00 | Illegally induced abortion                                   |
| 34 | 39470  | L08..00 | Failed attempted abortion                                    |
| 35 | 7413   | L041.00 | Spontaneous abortion incomplete                              |
| 36 | 1439   | L07..00 | Unspecified abortion                                         |
| 37 | 70384  | L050y00 | Unspecified legal abortion with no mention of complication   |
| 38 | 1879   | L071.00 | Unspecified abortion incomplete                              |
| 39 | 68938  | L040y00 | Unspec spontaneous abortion without mention of complication  |
| 40 | 49809  | LOA..00 | Failed attempted abortion                                    |
| 41 | 41783  | L041100 | Incomp spontaneous abortion + delayed/excessive haemorrhage  |
| 42 | 73445  | L050000 | Unspecified legal abortion + genital tract/pelvic infection  |
| 43 | 50612  | L052y00 | Complete legal abortion with no mention of complication      |
| 44 | 94359  | L042w00 | Complete spontaneous abortion + other specified complication |
| 45 | 68669  | L040w00 | Unspec spontaneous abortion + other specified complication   |
| 46 | 58085  | L052z00 | Complete legal abortion NOS                                  |
| 47 | 50903  | LOA2.00 | Failed medical abortion comp by delayed/excessive haem'ge    |
| 48 |        |         |                                                              |
| 49 |        |         |                                                              |
| 50 |        |         |                                                              |
| 51 |        |         |                                                              |
| 52 |        |         |                                                              |
| 53 |        |         |                                                              |
| 54 |        |         |                                                              |
| 55 |        |         |                                                              |
| 56 |        |         |                                                              |
| 57 |        |         |                                                              |
| 58 |        |         |                                                              |
| 59 |        |         |                                                              |
| 60 |        |         |                                                              |

|    |        |         |                                                              |
|----|--------|---------|--------------------------------------------------------------|
| 1  |        |         |                                                              |
| 2  |        |         |                                                              |
| 3  |        |         |                                                              |
| 4  | 33964  | L0A4.00 | Failed medical abortion, without complication                |
| 5  | 56822  | L050.00 | Legal abortion unspecified                                   |
| 6  | 51614  | L044z00 | Incomplete inevitable abortion without complication          |
| 7  | 41118  | L08z.00 | Failed attempted abortion NOS                                |
| 8  | 45806  | L070x00 | Unspecified abortion with complication NOS                   |
| 9  | 39754  | L051.11 | Medal abortion - incomplete                                  |
| 10 | 6730   | L051.12 | Surgical abortion - incomplete                               |
| 11 | 35184  | L071z00 | Unspecified incomplete abortion NOS                          |
| 12 | 105603 | L052500 | Complete legal abortion with shock                           |
| 13 | 107159 | L08x.00 | Failed attempted abortion with complication NOS              |
| 14 | 7817   | L042.00 | Spontaneous abortion complete                                |
| 15 | 106491 | L050100 | Unspecified legal abortion + delayed/excessive haemorrhage   |
| 16 | 66365  | L043y00 | Unspecified inevitable abortion with OS complication         |
| 17 | 47931  | L050w00 | Unspecified legal abortion with other specified complication |
| 18 | 47298  | L052.00 | Legal abortion complete                                      |
| 19 | 71529  | L060.00 | Illegal abortion unspecified                                 |
| 20 | 66561  | L062.00 | Illegal abortion complete                                    |
| 21 | 96418  | L06z.00 | Illegally induced abortion NOS                               |
| 22 | 56562  | L040z00 | Unspecified spontaneous abortion NOS                         |
| 23 | 47435  | L097200 | Readmission for retained produc of concept, illegal abortion |
| 24 | 72307  | L040000 | Unspec spontaneous abortion + genital tract/pelvic infection |
| 25 | 73443  | L051y00 | Incomplete legal abortion with no mention of complication    |
| 26 | 68936  | L051100 | Incomplete legal abortion + delayed or excessive haemorrhage |
| 27 | 96652  | L051w00 | Incomplete legal abortion with other specified complication  |
| 28 | 59084  | L071500 | Unspecified incomplete abortion with shock                   |
| 29 | 53229  | L060z00 | Unspecified illegal abortion NOS                             |
| 30 | 110905 | L070w00 | Unspecified abortion with other specified complication       |
| 31 | 29439  | L041z00 | Incomplete spontaneous abortion NOS                          |
| 32 | 21805  | L097300 | Readmission for retained produc of concept, unspec abortion  |
| 33 | 7114   | L044.00 | Inevitable abortion incomplete                               |
| 34 | 59572  | L0A3.00 | Failed medical abortion, complicated by embolism             |
| 35 | 22379  | L04z.00 | Spontaneous abortion NOS                                     |
| 36 | 59116  | L045x00 | Complete inevitable abortion with unspecified complication   |
| 37 | 12337  | L051.00 | Legal abortion incomplete                                    |
| 38 | 41379  | L052.11 | Medical abortion - complete                                  |
| 39 | 49849  | L052.12 | Surgical abortion - complete                                 |
| 40 | 906    | L100.00 | Threatened abortion                                          |
| 41 | 96598  | Z22CE00 | Number of induced abortions                                  |
| 42 | 29940  | L042z00 | Complete spontaneous abortion NOS                            |
| 43 | 94270  | L043x00 | Unspecified inevitable abortion with unspec complication     |
| 44 | 68511  | L040100 | Unspec spontaneous abortion + delayed/excessive haemorrhage  |
| 45 | 68110  | L043z00 | Unspecified inevitable abortion without complication         |
| 46 | 101218 | L051700 | Incomplete medical abortion                                  |
| 47 | 63777  | L045y00 | Complete inevitable abortion with OS complication            |
| 48 | 62659  | Lyu0200 | [X]Other abortion                                            |
| 49 |        |         |                                                              |
| 50 |        |         |                                                              |
| 51 |        |         |                                                              |
| 52 |        |         |                                                              |
| 53 |        |         |                                                              |
| 54 |        |         |                                                              |
| 55 |        |         |                                                              |
| 56 |        |         |                                                              |
| 57 |        |         |                                                              |
| 58 |        |         |                                                              |
| 59 |        |         |                                                              |
| 60 |        |         |                                                              |

|    |        |         |                                                              |
|----|--------|---------|--------------------------------------------------------------|
| 1  |        |         |                                                              |
| 2  |        |         |                                                              |
| 3  |        |         |                                                              |
| 4  | 101050 | L062000 | Complete illegal abortion + genital tract/pelvic infection   |
| 5  | 33770  | L05z.00 | Legally induced abortion NOS                                 |
| 6  | 101666 | L070300 | Unspecified abortion with renal failure                      |
| 7  | 105921 | L072y00 | Unspecified complete abortion + no mention of complication   |
| 8  |        |         |                                                              |
| 9  | 107171 | L042100 | Complete spontaneous abortion +delayed/excessive haemorrhage |
| 10 | 42458  | L040.00 | Spontaneous abortion unspecified                             |
| 11 | 50653  | L041y00 | Incomp spontaneous abortion with no mention of complication  |
| 12 | 67076  | L052x00 | Complete legal abortion with complication NOS                |
| 13 | 4708   | 7E08800 | Dilation and curettage removal of missed abortion            |
| 14 | 30276  | L041z11 | Retained products after spontaneous abortion                 |
| 15 | 29594  | L072z00 | Unspecified complete abortion NOS                            |
| 16 |        |         |                                                              |
| 17 | 23693  | L097100 | Readmission for retained produc of concept, legal abortion   |
| 18 | 35701  | L100000 | Threatened abortion unspecified                              |
| 19 |        |         |                                                              |
| 20 | 33989  | L045z00 | Complete inevitable abortion without complication            |
| 21 | 45340  | L040111 | Spontaneous abortion with heavy bleeding                     |
| 22 |        |         |                                                              |
| 23 | 102648 | 6776100 | Pre-termination counselling                                  |
| 24 | 17294  | 6776.13 | Termination counselling                                      |
| 25 | 100568 | 7F10y00 | Other specified surgical induction of labour                 |
| 26 |        |         |                                                              |
| 27 | 96821  | Q212000 | Liveborn with prelabour abnormal heart beat                  |
| 28 | 23664  | 63E..00 | Labour details                                               |
| 29 | 97459  | L300700 | Obstructed labour due to compound presentation               |
| 30 | 64976  | Z243200 | First stage of labour not established                        |
| 31 |        |         |                                                              |
| 32 | 73308  | L29z.00 | Problems affecting labour NOS                                |
| 33 | 66578  | L31..00 | Abnormal forces of labour                                    |
| 34 | 54127  | Z255.00 | Observation of second stage of labour                        |
| 35 |        |         |                                                              |
| 36 | 109523 | L307000 | Other failed trial of labour unspecified                     |
| 37 | 102969 | Q213200 | Liveborn with labour meconium in liquor                      |
| 38 | 29434  | 63E3.00 | Normal labour                                                |
| 39 |        |         |                                                              |
| 40 | 23316  | L140.11 | False labour                                                 |
| 41 | 72779  | L30z.00 | Obstructed labour NOS                                        |
| 42 | 67423  | Z23AG00 | Hypertonic lower uterine segment during labour               |
| 43 | 72736  | Z246200 | Onset of labour first stage                                  |
| 44 |        |         |                                                              |
| 45 | 20809  | L14..00 | Early or threatened labour                                   |
| 46 | 3088   | 7F11.00 | Other induction of labour                                    |
| 47 | 108764 | L29y.00 | Other problems affecting labour                              |
| 48 |        |         |                                                              |
| 49 | 23525  | L141.00 | Other threatened labour                                      |
| 50 | 34981  | 7F10z00 | Surgical induction of labour NOS                             |
| 51 | 64395  | Z255D00 | Ability to push in labour                                    |
| 52 | 70850  | Q212100 | Liveborn with prelabour hypoxia                              |
| 53 |        |         |                                                              |
| 54 | 103105 | L293.00 | Septicaemia during labour                                    |
| 55 | 63287  | Z24..00 | Labour observations                                          |
| 56 | 83541  | Z243500 | Normal length of first stage of labour                       |
| 57 |        |         |                                                              |
| 58 | 49302  | Z243100 | First stage of labour established                            |
| 59 | 33632  | 7F11200 | Syntocinon induction of labour                               |
| 60 | 93041  | Z246700 | Onset of second stage of labour                              |

|    |        |         |                                                             |
|----|--------|---------|-------------------------------------------------------------|
| 1  |        |         |                                                             |
| 2  |        |         |                                                             |
| 3  |        |         |                                                             |
| 4  | 64692  | L141z00 | Other threatened labour NOS                                 |
| 5  | 92738  | ZNA2300 | Does perform labouring activities                           |
| 6  | 36756  | L386.00 | Toxic reaction to local anaesthesia during labour and deliv |
| 7  | 49858  | Z23G.00 | Uterine observation in labour                               |
| 8  | 64206  | L313z00 | Precipitate labour NOS                                      |
| 9  | 109569 | L313000 | Precipitate labour unspecified                              |
| 10 | 25428  | Z246211 | Start of labour                                             |
| 11 | 23674  | L291.11 | Failed medical induction of labour                          |
| 12 | 87342  | Z244100 | Observation of duration of labour                           |
| 13 | 50876  | H472.00 | Asp pneumonitis due to anaesthesia during labour and deliv  |
| 14 | 93735  | Z246A00 | Total duration of labour                                    |
| 15 | 71189  | Z244400 | Late onset of labour                                        |
| 16 | 22115  | 7F10.00 | Surgical induction of labour                                |
| 17 | 59789  | L14z.00 | Early or threatened labour NOS                              |
| 18 | 54167  | 6322    | 2nd stage of labour length                                  |
| 19 | 44337  | L307.00 | Failed trial of labour unspecified                          |
| 20 | 32555  | L351000 | Rupture of uterus during and after labour unspecified       |
| 21 | 3004   | L14..11 | Premature labour                                            |
| 22 | 30782  | 632Z.00 | Length of labour NOS                                        |
| 23 | 65867  | 7M35011 | Entonox analgesia in labour                                 |
| 24 | 23549  | L31z.00 | Abnormality of forces of labour NOS                         |
| 25 | 66242  | Z243400 | Rapid first stage of labour                                 |
| 26 | 59445  | Z243800 | First stage of labour problem                               |
| 27 | 94809  | Z256200 | Prolonged third stage of labour                             |
| 28 | 99290  | Z255800 | Second stage of labour problem                              |
| 29 | 40448  | 7F11100 | Induction of labour using prostaglandins                    |
| 30 | 56873  | ZNA2200 | Unable to perform labouring activities                      |
| 31 | 88775  | 7F11300 | Medical induction of labour                                 |
| 32 | 40724  | Z255700 | Failure to progress in second stage of labour               |
| 33 | 45057  | OZ3Z.00 | Other labourer NOS                                          |
| 34 | 95570  | L307z00 | Failed trial of labour NOS                                  |
| 35 | 64732  | Q213000 | Liveborn with labour abnormal heart beat                    |
| 36 | 57002  | L290.11 | Failed mechanical induction of labour                       |
| 37 | 13215  | 632..00 | Length of labour                                            |
| 38 | 48484  | Z244500 | Relation of onset of labour to due date                     |
| 39 | 49953  | 6323    | 3rd stage of labour length                                  |
| 40 | 33421  | 7F11000 | Oxytocic induction of labour                                |
| 41 | 35628  | L321.00 | Prolonged labour unspecified                                |
| 42 | 100252 | Z255J00 | Pushing involuntarily in labour                             |
| 43 | 98422  | Q213100 | Liveborn with labour hypoxia                                |
| 44 | 63022  | L281500 | Prem rupture of membranes onset of labour after 24 hours    |
| 45 | 103000 | L29yz00 | Other problems affecting labour NOS                         |
| 46 | 98003  | Z23B400 | Contraction of uterus during labour                         |
| 47 | 73319  | L302.00 | Obstructed labour caused by pelvic soft tissues             |
| 48 | 55225  | L32z.00 | Prolonged labour NOS                                        |
| 49 |        |         |                                                             |
| 50 |        |         |                                                             |
| 51 |        |         |                                                             |
| 52 |        |         |                                                             |
| 53 |        |         |                                                             |
| 54 |        |         |                                                             |
| 55 |        |         |                                                             |
| 56 |        |         |                                                             |
| 57 |        |         |                                                             |
| 58 |        |         |                                                             |
| 59 |        |         |                                                             |
| 60 |        |         |                                                             |



|    |        |         |                                                             |
|----|--------|---------|-------------------------------------------------------------|
| 1  |        |         |                                                             |
| 2  |        |         |                                                             |
| 3  |        |         |                                                             |
| 4  | 41036  | 7M35000 | Gas and air analgesia in labour                             |
| 5  | 104405 | Z256100 | Normal length of third stage of labour                      |
| 6  | 71720  | L350z00 | Rupture of uterus before labour NOS                         |
| 7  | 60124  | Z243411 | Rapid progress in first stage of labour                     |
| 8  | 71171  | L350000 | Rupture of uterus before labour unspecified                 |
| 9  | 106135 | Z244200 | Long duration of labour                                     |
| 10 | 94874  | Z244300 | Short duration of labour                                    |
| 11 | 103154 | L321z00 | Prolonged labour NOS                                        |
| 12 | 65243  | L141000 | Other threatened labour unspecified                         |
| 13 | 60255  | L351z00 | Rupture of uterus during and after labour NOS               |
| 14 | 99968  | L321000 | Unspecified prolonged labour, unspecified                   |
| 15 | 3272   | 7F11z00 | Other induction of labour NOS                               |
| 16 | 44306  | L126600 | Eclampsia in labour                                         |
| 17 | 48708  | Z244411 | Postmature labour                                           |
| 18 | 95354  | Z255300 | Progress of second stage of labour                          |
| 19 | 62622  | L30z000 | Obstructed labour NOS, unspecified                          |
| 20 | 108419 | L38X.00 | Complication of anaesthesia during labour and deliv unsp    |
| 21 | 40702  | Z243600 | Slow progress in first stage of labour                      |
| 22 | 37267  | L301400 | Obstructed labour due to generally contracted pelvis        |
| 23 | 61611  | 7F1A400 | Trial of labour NEC                                         |
| 24 | 22261  | Z241100 | Onset of labour induced                                     |
| 25 | 65900  | Z243300 | Progress of labour - first stage                            |
| 26 | 32997  | 6321    | 1st stage of labour length                                  |
| 27 | 29071  | 7L16000 | Intravenous induction of labour                             |
| 28 | 54596  | L140200 | False labour at or after 37 completed weeks of gestation    |
| 29 | 42101  | L140z00 | Threatened premature labour NOS                             |
| 30 | 32877  | L350.00 | Ruptured uterus before labour                               |
| 31 | 107198 | L292000 | Unspecified maternal pyrexia during labour, unspecified     |
| 32 | 97907  | L29..00 | Other problems affecting labour                             |
| 33 | 819    | L30..00 | Obstructed labour                                           |
| 34 | 24447  | 7F25.13 | Monitoring during labour                                    |
| 35 | 73331  | Z246900 | Duration of second stage of labour                          |
| 36 | 21626  | 63E1.00 | Spontaneous onset of labour                                 |
| 37 | 100563 | L302000 | Obstructed labour caused by pelvic soft tissues unspecified |
| 38 | 23548  | L301.00 | Obstructed labour caused by bony pelvis                     |
| 39 | 104746 | L302z00 | Obstructed labour caused by pelvic soft tissues NOS         |
| 40 | 48602  | L32..00 | Long labour                                                 |
| 41 | 36655  | Z245.00 | Observation of blood loss in labour                         |
| 42 | 99170  | Z243.00 | Observation of first stage of labour                        |
| 43 | 25112  | Z241.00 | Labour established                                          |
| 44 | 56915  | Z249.00 | Labour problem                                              |
| 45 | 62656  | Z255400 | Rapid second stage of labour                                |
| 46 | 94396  | L30zz00 | Obstructed labour NOS                                       |
| 47 | 29529  | L351.00 | Rupture of uterus during and after labour                   |
| 48 | 102136 | L292z00 | Unspecified maternal pyrexia during labour NOS              |
| 49 |        |         |                                                             |
| 50 |        |         |                                                             |
| 51 |        |         |                                                             |
| 52 |        |         |                                                             |
| 53 |        |         |                                                             |
| 54 |        |         |                                                             |
| 55 |        |         |                                                             |
| 56 |        |         |                                                             |
| 57 |        |         |                                                             |
| 58 |        |         |                                                             |
| 59 |        |         |                                                             |
| 60 |        |         |                                                             |

|    |        |         |                                                              |
|----|--------|---------|--------------------------------------------------------------|
| 1  |        |         |                                                              |
| 2  |        |         |                                                              |
| 3  |        |         |                                                              |
| 4  | 40080  | 7F11y00 | Other specified other induction of labour                    |
| 5  | 46297  | Z246311 | Onset of labour pains                                        |
| 6  | 60333  | L301500 | Obstructed labour due to pelvic inlet contraction            |
| 7  | 85226  | Lyu4000 | [X]Other failed induction of labour                          |
| 8  |        |         |                                                              |
| 9  | 103056 | Z244.00 | Observation of pattern of labour                             |
| 10 | 64548  | L281300 | Prem rupture of membranes onset of labour within 24 hours    |
| 11 | 68319  | L351300 | Rupture of uterus during/after labour with postnatal problem |
| 12 | 62278  | L281400 | Premature rupture of membranes, labour delayed by therapy    |
| 13 |        |         |                                                              |
| 14 | 22613  | Z248.00 | Normal labour                                                |
| 15 | 90775  | Z246.00 | Observation of measures of labour                            |
| 16 | 70150  | Z246100 | Duration of labour                                           |
| 17 |        |         |                                                              |
| 18 | 28928  | L140.00 | Threatened premature labour                                  |
| 19 | 93205  | Z255F00 | Not pushing well in labour                                   |
| 20 | 99660  | L300400 | Obstructed labour due to face presentation                   |
| 21 | 48274  | Q212200 | Liveborn with prelabour meconium in liquor                   |
| 22 |        |         |                                                              |
| 23 | 59296  | L140000 | Threatened premature labour unspecified                      |
| 24 | 9294   | L292.00 | Maternal pyrexia during labour, unspecified                  |
| 25 | 28830  | Z242.00 | Labour not established                                       |
| 26 |        |         |                                                              |
| 27 | 104206 | L29z000 | Problems affecting labour NOS unspecified                    |
| 28 | 28700  | 7F1..11 | Labour operations                                            |
| 29 | 30001  | L313.00 | Precipitate labour                                           |
| 30 | 104716 | Z255E11 | Pushing well in labour                                       |
| 31 |        |         |                                                              |
| 32 | 98918  | Z247100 | Expulsion of IUCD during third stage of labour               |
| 33 | 62600  | L29zz00 | Problems affecting labour NOS                                |
| 34 | 364    | 7F13111 | Lower uterine segment caesarean section (LSCS) NEC           |
| 35 |        |         |                                                              |
| 36 | 13315  | 14Y0.00 | Born by caesarean section                                    |
| 37 | 13316  | 14Y6.00 | Born by emergency caesarean section                          |
| 38 | 29155  | 7F1A000 | Caesarean hysterectomy                                       |
| 39 | 10049  | 7F12111 | Elective lower uterine segment caesarean section (LSCS)      |
| 40 |        |         |                                                              |
| 41 | 12118  | 7F13300 | Emergency caesarean section                                  |
| 42 | 72513  | 7F13200 | Extraperitoneal caesarean section                            |
| 43 | 15361  | 14Y2.00 | Born by elective caesarean section                           |
| 44 |        |         |                                                              |
| 45 | 8192   | Q473.00 | Other hypothermia of newborn                                 |
| 46 | 3007   | Q316.00 | Newborn transitory tachypnoea                                |
| 47 | 100616 | ZV30100 | [V]Singleton, born before admission to hospital              |
| 48 | 93976  | Qyu4200 | [X]Other bacterial sepsis of newborn                         |
| 49 |        |         |                                                              |
| 50 | 56336  | Q40A100 | Sepsis of newborn due to Escherichia coli                    |
| 51 | 66999  | Q474111 | Newborn environmental hyperthermia                           |
| 52 | 15985  | ZV32.00 | [V]Twin, mate stillborn                                      |
| 53 |        |         |                                                              |
| 54 | 59878  | Q463.00 | Transitory ileus of newborn                                  |
| 55 | 10452  | 6333    | Twins - both live born                                       |
| 56 | 93999  | 6339    | Triplets - 3 still born                                      |
| 57 |        |         |                                                              |
| 58 | 99418  | Q482.00 | Central nervous system dysfunction in newborn NOS            |
| 59 | 41064  | Q484.00 | Newborn drug reaction and intoxication                       |
| 60 | 56888  | Q483000 | Newborn feeding problem, unspecified                         |

|    |        |         |                                                              |
|----|--------|---------|--------------------------------------------------------------|
| 1  |        |         |                                                              |
| 2  |        |         |                                                              |
| 3  | 13304  | Q480.12 | Seizures in newborn                                          |
| 4  | 53052  | Q425.00 | Late anaemia of newborn due to isoimmunisation               |
| 5  | 98857  | ZV31200 | [V]Twin, not hospitalised, mate live born                    |
| 6  | 38852  | Q311300 | Aspiration of vomit in newborn                               |
| 7  | 104697 | G520000 | Acute aseptic myocarditis of the newborn                     |
| 8  | 55878  | Q494.00 | Transient myocardial ischaemia of newborn                    |
| 9  | 108976 | 6318    | Born in hospital                                             |
| 10 | 19577  | Q417100 | Cerebellar (nontraum) and post fossa haemorrhage fet newborn |
| 11 | 108501 | Q484z00 | Newborn drug reaction or intoxication NOS                    |
| 12 | 88204  | ZV30000 | [V]Singleton, born in hospital                               |
| 13 | 98669  | Qyu4100 | [X]Sepsis/newborn due to other+unspecified staphylococcus    |
| 14 | 15457  | Q482y00 | Other newborn abnormal cerebral signs                        |
| 15 | 21839  | Q480.11 | Fits in newborn                                              |
| 16 | 12085  | Q404.11 | Umbilical stump infection of the newborn                     |
| 17 | 72669  | Q452.00 | Newborn disseminated intravascular coagulation               |
| 18 | 20083  | Q450.00 | Haemorrhagic disease of the newborn                          |
| 19 | 38877  | R024z00 | [D]Jaundice (not of newborn) NOS                             |
| 20 | 8515   | Q31y111 | Cyanotic attacks of the newborn                              |
| 21 | 110616 | 6338    | Triplets-1 live+ 2 still born                                |
| 22 | 57128  | 6336    | Triplets - all live born                                     |
| 23 | 21468  | ZV29100 | [V]Newborn receiving special care                            |
| 24 | 14813  | Q481.00 | Newborn cerebral irritability, unspecified                   |
| 25 | 17482  | Q474211 | Thermal injury in newborn NEC                                |
| 26 | 47693  | Q40W.00 | Sepsis of newborn due to other+unspecified streptococci      |
| 27 | 98366  | Qyu4800 | [X]Sepsis of newborn due to other+unspecified streptococci   |
| 28 | 23015  | 6334    | Twins - 1 still + 1 live born                                |
| 29 | 106918 | Q44X.00 | Trans disorder carbohydrate metab of fet and newborn unsp    |
| 30 | 57783  | Q417000 | Intracerebral (nontraumatic) haemorrhage of fet and newborn  |
| 31 | 9477   | Q483.00 | Feeding problems in newborn                                  |
| 32 | 32703  | Q21z.12 | Hypoxia in newborn NOS                                       |
| 33 | 36071  | Q21z.11 | Anoxia in newborn NOS                                        |
| 34 | 70538  | Q475.00 | Oedema of newborn unspecified                                |
| 35 | 13300  | Q477.00 | Newborn breast engorgement                                   |
| 36 | 56476  | Q482z00 | Central nervous system dysfunction in newborn NOS            |
| 37 | 34502  | 6335    | Twins - both still born                                      |
| 38 | 63044  | ZV31z00 | [V]Twin, mate liveborn, NOS                                  |
| 39 | 19579  | Q448.00 | Newborn late metabolic acidosis                              |
| 40 | 90510  | Q44T.00 | Transitory metabolic disturbance of newborn, unspecified     |
| 41 | 64600  | Q042.00 | Fet newborn affect mat exposure to environml chem subs       |
| 42 | 89262  | Q474z00 | Newborn temperature regulation disorder NOS                  |
| 43 | 73978  | Qyu3800 | [X]Other apnoea of newborn                                   |
| 44 | 22031  | Q40y200 | Septicaemia of newborn                                       |
| 45 | 45750  | Q4z..13 | Newborn death                                                |
| 46 | 105039 | 44qW000 | Newborn blood spot screening                                 |
| 47 | 98938  | Qyu6C00 | [X]Transitory metabolic disturbance of newborn, unspecified  |
| 48 |        |         |                                                              |
| 49 |        |         |                                                              |
| 50 |        |         |                                                              |
| 51 |        |         |                                                              |
| 52 |        |         |                                                              |
| 53 |        |         |                                                              |
| 54 |        |         |                                                              |
| 55 |        |         |                                                              |
| 56 |        |         |                                                              |
| 57 |        |         |                                                              |
| 58 |        |         |                                                              |
| 59 |        |         |                                                              |
| 60 |        |         |                                                              |

|    |        |         |                                                              |
|----|--------|---------|--------------------------------------------------------------|
| 1  |        |         |                                                              |
| 2  |        |         |                                                              |
| 3  |        |         |                                                              |
| 4  | 19585  | Q483200 | Slow feeding in newborn                                      |
| 5  | 55895  | Q474200 | Hyperthermia in newborn, unspecified                         |
| 6  | 31476  | 9114.11 | FP58 - newborn registration                                  |
| 7  | 68065  | 9114.12 | GP58 - newborn registration                                  |
| 8  |        |         |                                                              |
| 9  | 104239 | Q48F.00 | Hypoxic ischaemic encephalopathy of newborn                  |
| 10 | 69413  | ZV33000 | [V]Twin, unspecified, born in hospital                       |
| 11 | 54589  | D400700 | Acquired neutropenia in newborn                              |
| 12 | 26871  | Q318.00 | Primary sleep apnoea of newborn                              |
| 13 |        |         |                                                              |
| 14 | 105139 | Qyu3700 | [X]Other and unspecified atelectasis of newborn              |
| 15 | 93859  | Qyu8400 | [X]Hypothermia of newborn, unspecified                       |
| 16 | 20478  | ZV27200 | [V]Twins, both live born                                     |
| 17 |        |         |                                                              |
| 18 | 42527  | Q42..11 | Isoimmunisation of newborn                                   |
| 19 | 98721  | P320011 | Newborn glaucoma                                             |
| 20 | 19947  | ZV31.00 | [V]Twin, mate live born                                      |
| 21 | 97799  | Qyu3900 | [X]Other specified respiratory conditions of newborn         |
| 22 |        |         |                                                              |
| 23 | 3613   | Q40A.00 | Sepsis of the newborn                                        |
| 24 | 109480 | 44qW100 | Completion of newborn blood spot screening card              |
| 25 | 40296  | Q46X.00 | Intestinal obstruction of newborn, unspecified               |
| 26 |        |         |                                                              |
| 27 | 39165  | Q483100 | Newborn regurgitation of food                                |
| 28 | 3615   | Q436200 | Newborn physiological jaundice NOS                           |
| 29 | 72352  | Q474300 | Transitory fever of newborn                                  |
| 30 | 40867  | Q485100 | Withdrawal symptoms from therapeutic use of drugs in newborn |
| 31 | 61943  | Q483400 | Rumination in newborn                                        |
| 32 |        |         |                                                              |
| 33 | 5173   | Q421.11 | ABO isoimmunisation of the newborn                           |
| 34 | 5218   | 6316    | Born before arrival                                          |
| 35 |        |         |                                                              |
| 36 | 56210  | Q311100 | Aspiration of liquor or mucus in newborn                     |
| 37 | 109128 | Qyu5100 | [X]Other umbilical haemorrhages of newborn                   |
| 38 | 108994 | 13lf000 | Unborn child is cause for safeguarding concern               |
| 39 | 43366  | Q207011 | Phrenic nerve palsy in newborn                               |
| 40 | 52525  | Q462.00 | Newborn swallowing maternal blood - haematemesis/melaena     |
| 41 | 61729  | Q482100 | Coma in newborn                                              |
| 42 | 99425  | QyuA400 | [X]Disorder of muscle tone of newborn, unspecified           |
| 43 | 47446  | Q474000 | Newborn dehydration fever                                    |
| 44 | 44256  | 9Ea4.00 | Unborn child at risk physi/ment abnormal serious handicap    |
| 45 | 61800  | Q437z00 | Kernicterus of newborn NOS                                   |
| 46 |        |         |                                                              |
| 47 | 104301 | 13lv000 | Unborn child subject to child protection plan                |
| 48 | 34504  | Q485.00 | Newborn drug withdrawal syndrome                             |
| 49 |        |         |                                                              |
| 50 | 23876  | Q487.00 | Umbilical polyp of newborn                                   |
| 51 | 56909  | Q411200 | Intraventric (nontraumatic) haemorrhage grade 3 fet newborn  |
| 52 | 41053  | Q483z11 | Bottle feeding problem in the newborn                        |
| 53 | 95873  | Q446600 | Disturbances of potassium balance of newborn                 |
| 54 | 52577  | Q483500 | Underfeeding in newborn                                      |
| 55 |        |         |                                                              |
| 56 | 28758  | ZV29200 | [V]Newborn receiving intensive care                          |
| 57 | 47227  | ZV27300 | [V]Twins, one live born and one stillborn                    |
| 58 |        |         |                                                              |
| 59 | 38890  | ZV27400 | [V]Twins, both stillborn                                     |
| 60 |        |         |                                                              |

|    |        |         |                                                             |
|----|--------|---------|-------------------------------------------------------------|
| 1  |        |         |                                                             |
| 2  |        |         |                                                             |
| 3  |        |         |                                                             |
| 4  | 44238  | ZV31000 | [V]Twin, born in hospital, mate live born                   |
| 5  | 50017  | Q472.00 | Newborn cold injury syndrome                                |
| 6  | 101103 | Q214200 | Liveborn with meconium liquor, unspecified                  |
| 7  | 109703 | 41G4.00 | Newborn blood spot specimen received                        |
| 8  |        |         |                                                             |
| 9  | 98336  | Q311113 | Aspiration of amniotic fluid in newborn                     |
| 10 | 64262  | Q311112 | Aspiration of liquor in newborn                             |
| 11 | 36845  | Q311111 | Aspiration of mucus in newborn                              |
| 12 | 73521  | QyuA200 | [X]Other disorders of muscle tone of newborn                |
| 13 | 72705  | QyuA000 | [X]Oth specified disturbances of cerebral status of newborn |
| 14 | 57674  | Q411100 | Intraventric (nontraumatic) haemorrhage grade 2 fet newborn |
| 15 | 65792  | Q484000 | Grey syndrome of newborn                                    |
| 16 |        |         |                                                             |
| 17 | 68254  | Q474100 | Newborn environmental pyrexia                               |
| 18 | 19576  | Q31y600 | Apnoea of newborn                                           |
| 19 |        |         |                                                             |
| 20 | 97418  | Q30..12 | Pulmonary hypoperfusion syndrome of newborn                 |
| 21 | 108359 | ZV30200 | [V]Singleton, born outside hospital and not hospitalised    |
| 22 | 101529 | ZV32z00 | [V]Twin, mate stillborn, NOS                                |
| 23 |        |         |                                                             |
| 24 | 86001  | ZV32000 | [V]Twin, born in hospital, mate stillborn                   |
| 25 | 95736  | Qyu8000 | [X]Other hypothermia of newborn                             |
| 26 |        |         |                                                             |
| 27 | 48664  | Q444111 | Hypocalcaemic tetany in newborn                             |
| 28 | 11509  | Q483300 | Vomiting in newborn                                         |
| 29 | 99244  | Q446500 | Disturbances of sodium balance of newborn                   |
| 30 | 19578  | Q483600 | Overfeeding in newborn                                      |
| 31 |        |         |                                                             |
| 32 | 39691  | Q40A000 | Sepsis of newborn due to Staphylococcus aureus              |
| 33 | 93597  | Q311200 | Aspiration of blood in newborn                              |
| 34 | 72704  | Qyu3000 | [X]Other respiratory distress of newborn                    |
| 35 |        |         |                                                             |
| 36 | 94759  | Q214000 | Liveborn with abnormal heart beat, unspecified              |
| 37 | 103401 | Q466111 | Intestinal obstruction in newborn due to faecoliths         |
| 38 | 104825 | Q453.00 | Other newborn transient coagulation defect                  |
| 39 |        |         |                                                             |
| 40 | 47317  | Q483z00 | Newborn feeding problem NOS                                 |
| 41 | 53402  | Q483z12 | Breast feeding problem in the newborn                       |
| 42 | 110294 | QyuA100 | [X]Other feeding problems of newborn                        |
| 43 | 73036  | 6337    | Triples -2 live+ 1 still born                               |
| 44 |        |         |                                                             |
| 45 | 59694  | Q411000 | Intraventric (nontraumatic) haemorrhage grade 1 fet newborn |
| 46 | 20005  | Q480.00 | Convulsions in newborn                                      |
| 47 | 26682  | Q404.00 | Omphalitis of the newborn                                   |
| 48 |        |         |                                                             |
| 49 | 37044  | Q450.11 | Vitamin K deficiency of the newborn                         |
| 50 | 25091  | Z23AP00 | Premature uterine contraction                               |
| 51 | 102737 | L112300 | Premature separation of placenta with coagulation defect    |
| 52 | 53829  | L281z00 | Premature rupture of membranes NOS                          |
| 53 |        |         |                                                             |
| 54 | 424    | L281.00 | Premature rupture of membranes                              |
| 55 | 108033 | Lyu3D00 | [X]Other premature separation of placenta                   |
| 56 | 69713  | L281000 | Premature rupture of membranes unspecified                  |
| 57 |        |         |                                                             |
| 58 | 59452  | L264000 | Intrauterine death unspecified                              |
| 59 | 4697   | Q10z.11 | Intrauterine growth retardation                             |
| 60 | 1413   | L264.00 | Intrauterine death                                          |

|    |        |         |                                                              |
|----|--------|---------|--------------------------------------------------------------|
| 1  |        |         |                                                              |
| 2  |        |         |                                                              |
| 3  |        |         |                                                              |
| 4  | 89588  | 7E0A600 | Intrauterine insemination without superovulation donor sperm |
| 5  | 37831  | L264z00 | Intrauterine death NOS                                       |
| 6  | 111544 | 7E0A500 | Intrauterine insemination without superovulat partner sperm  |
| 7  | 48471  | PF6D200 | Intrauterine amputation of lower limb                        |
| 8  | 91652  | 7E0A300 | Intrauterine insemination superovulation partner sperm       |
| 9  | 88271  | 7E0A400 | Intrauterine insemination superovulation using donor sperm   |
| 10 | 36694  | Q21..11 | Intrauterine hypoxia                                         |
| 11 | 9542   | L265311 | Maternal care for intrauterine growth retardation            |
| 12 | 57522  | Q451y11 | Neonatal thrombocytopenia due to platelet alloimmunisation   |
| 13 | 44062  | A984000 | Neonatal gonococcal conjunctivits                            |
| 14 | 41151  | Q406611 | Neonatal viral dacryocystitis or conjunctivitis              |
| 15 | 45852  | Q406613 | Neonatal conjunctivitis due to virus                         |
| 16 | 18439  | 44qW.00 | Neonatal screening test                                      |
| 17 | 63783  | Q407y00 | Other specified neonatal candida infection                   |
| 18 | 71752  | Q457000 | Neonatal isoimmune neutropenia                               |
| 19 | 30795  | Q492.00 | Neonatal hypertension                                        |
| 20 | 109861 | Q444100 | Other neonatal hypocalcaemia                                 |
| 21 | 53387  | 14I6.00 | H/O: neonatal abstinence syndrome                            |
| 22 | 13297  | Q447.00 | Neonatal hypoglycaemia                                       |
| 23 | 110197 | Q44y.00 | Other transitory neonatal endocrine and metabolic problem    |
| 24 | 95112  | Q407511 | Neonatal monilial septicaemia                                |
| 25 | 31315  | Q41..11 | Neonatal haemorrhage                                         |
| 26 | 11629  | 2FX..00 | O/E - Umbilical stump - neonatal                             |
| 27 | 99830  | Q446y00 | Other specified transitory neonatal electrolyte disturbance  |
| 28 | 52572  | Q406300 | Neonatal dacryocystitis or conjunctivitis due to E.Coli      |
| 29 | 67105  | Q446300 | Transitory neonatal hyperkalaemia                            |
| 30 | 73994  | Q406400 | Neonatal dacryocystitis/conjunctivitis due to staphylococcus |
| 31 | 32722  | 9kJ..00 | Neonatal check - enhanced services administration            |
| 32 | 18991  | 313K.00 | Neonatal hearing test                                        |
| 33 | 100646 | 67AD.00 | Neonatal feeding education                                   |
| 34 | 37782  | F251100 | Neonatal myoclonic epilepsy                                  |
| 35 | 70045  | Q45y.00 | Other specified transient neonatal blood disorder            |
| 36 | 13302  | Q407.12 | Neonatal thrush                                              |
| 37 | 40123  | Q407.11 | Neonatal monilia                                             |
| 38 | 72350  | Q451y00 | Other specified transient neonatal thrombocytopenia          |
| 39 | 97518  | Q451z00 | Transient neonatal thrombocytopenia NOS                      |
| 40 | 48202  | Q48A.00 | Neonatal cerebral leukomalacia                               |
| 41 | 29743  | Q407000 | Neonatal candidiasis of mouth                                |
| 42 | 29715  | Q406.00 | Neonatal dacryocystitis and conjunctivitis                   |
| 43 | 55492  | Q447000 | Iatrogenic neonatal hypoglycaemia                            |
| 44 | 69813  | Q407z00 | Neonatal candida infection NOS                               |
| 45 | 8069   | Q433A00 | Neonatal jaundice from breast milk inhibitor                 |
| 46 | 3211   | Q433200 | Breast feeding inhibitors causing neonatal jaundice          |
| 47 | 7818   | Q31y500 | Neonatal snuffles                                            |
| 48 | 26686  | Q485200 | Neonatal Abstinence Syndrome                                 |
| 49 |        |         |                                                              |
| 50 |        |         |                                                              |
| 51 |        |         |                                                              |
| 52 |        |         |                                                              |
| 53 |        |         |                                                              |
| 54 |        |         |                                                              |
| 55 |        |         |                                                              |
| 56 |        |         |                                                              |
| 57 |        |         |                                                              |
| 58 |        |         |                                                              |
| 59 |        |         |                                                              |
| 60 |        |         |                                                              |

|    |        |         |                                                             |
|----|--------|---------|-------------------------------------------------------------|
| 1  |        |         |                                                             |
| 2  |        |         |                                                             |
| 3  |        |         |                                                             |
| 4  | 17940  | F4F5400 | Neonatal nasolacrimal duct obstruction                      |
| 5  | 64472  | Q44V.00 | Neonatal goitre, not elsewhere classified                   |
| 6  | 32327  | Q406712 | Neonatal conjunctivitis due to chlamydiae                   |
| 7  | 94578  | Q457z00 | Transient neonatal neutropenia NOS                          |
| 8  | 46817  | Q446200 | Transitory neonatal hyponatraemia                           |
| 9  | 93307  | Q41y400 | Neonatal rectal haemorrhage                                 |
| 10 | 72370  | J004400 | Neonatal enamel hypoplasia                                  |
| 11 | 93210  | Q446z00 | Transitory neonatal electrolyte disturbance NOS             |
| 12 | 36127  | Q406412 | Neonatal conjunctivitis due to staphylococcus               |
| 13 | 26678  | Q406411 | Neonatal dacryocystitis due to staphylococcus               |
| 14 | 21472  | Q441.00 | Neonatal diabetes mellitus                                  |
| 15 | 48010  | Q443.00 | Neonatal thyrotoxicosis                                     |
| 16 | 39055  | 9kJ0.00 | Neonatal check - enhanced service completed                 |
| 17 | 15487  | Q407100 | Neonatal candidiasis of perineum                            |
| 18 | 28292  | Q405.00 | Neonatal infective mastitis                                 |
| 19 | 16482  | Q407.00 | Neonatal candida infection                                  |
| 20 | 2240   | Q4z..12 | Neonatal death                                              |
| 21 | 109658 | Qyu5300 | [X]Other neonatal gastrointestinal haemorrhage              |
| 22 | 53603  | Q48C.00 | Neonatal hypotension                                        |
| 23 | 17496  | Q31y511 | Neonatal sniffles                                           |
| 24 | 48638  | Q433800 | Neonatal jaundice with porphyria                            |
| 25 | 28341  | Q48y600 | Early neonatal death                                        |
| 26 | 44358  | Q44y000 | Transitory neonatal tyrosinaemia                            |
| 27 | 63759  | Q406y00 | Other specified neonatal dacryocystitis or conjunctivitis   |
| 28 | 23422  | Q406100 | Neonatal conjunctivitis                                     |
| 29 | 51913  | Q41y300 | Neonatal melaena                                            |
| 30 | 38485  | 7L13000 | Neonatal exchange blood transfusion                         |
| 31 | 35727  | Q407200 | Neonatal candidiasis of other skin                          |
| 32 | 49769  | ZV29000 | [V]Normal level of neonatal care                            |
| 33 | 45303  | Q433000 | Delayed conjugation causing neonatal jaundice, unspecified  |
| 34 | 55360  | Q433z00 | Delayed conjugation causing neonatal jaundice NOS           |
| 35 | 30742  | F13z500 | Benign neonatal sleep myoclonus                             |
| 36 | 21164  | Q48y411 | Neonatal 'craniotabes'                                      |
| 37 | 56614  | Q488.00 | Neonatal cerebral ischaemia                                 |
| 38 | 104194 | 2L...00 | Neonatal examination                                        |
| 39 | 38163  | Q46y100 | Neonatal diarrhoea                                          |
| 40 | 45444  | Q457.00 | Transient neonatal neutropenia                              |
| 41 | 36564  | Q48y700 | Late neonatal death                                         |
| 42 | 45012  | Q44U.00 | Transitory neonatal endocrine disorder, unspecified         |
| 43 | 49516  | Q414300 | Neonatal vaginal haemorrhage                                |
| 44 | 27845  | Q446000 | Neonatal dehydration                                        |
| 45 | 93156  | Q433y11 | Neonatal jaundice - deficiency enzyme for bilirubin conjug. |
| 46 | 65686  | Q444.12 | Neonatal hypoparathyroidism                                 |
| 47 | 72347  | Q406800 | Neonatal dacryocystitis/conjunctivitis-other inclusion body |
| 48 | 72494  | Q406812 | Neonatal conjunctivitis due to other inclusion body         |
| 49 |        |         |                                                             |
| 50 |        |         |                                                             |
| 51 |        |         |                                                             |
| 52 |        |         |                                                             |
| 53 |        |         |                                                             |
| 54 |        |         |                                                             |
| 55 |        |         |                                                             |
| 56 |        |         |                                                             |
| 57 |        |         |                                                             |
| 58 |        |         |                                                             |
| 59 |        |         |                                                             |
| 60 |        |         |                                                             |

|    |        |                                                                      |
|----|--------|----------------------------------------------------------------------|
| 1  |        |                                                                      |
| 2  |        |                                                                      |
| 3  |        |                                                                      |
| 4  | 43576  | Q406811 Neonatal dacryocystitis due to other inclusion body          |
| 5  | 27962  | Q311400 Neonatal aspiration of milk and regurgitated food            |
| 6  | 24792  | Q31y611 Neonatal apnoeic attack                                      |
| 7  | 106500 | Q44A.00 Neonatal hypoparathyroidism                                  |
| 8  |        |                                                                      |
| 9  | 27793  | Q406700 Neonatal dacryocystitis or conjunctivitis due to chlamydiae  |
| 10 | 35507  | Q433.00 Other neonatal jaundice - delayed conjugation other cause    |
| 11 | 58833  | Q433700 Neonatal jaundice with congenital hypothyroidism             |
| 12 | 47909  | Q449.00 Neonatal tetany without calcium or magnesium deficiency      |
| 13 |        |                                                                      |
| 14 | 71056  | Q433y00 Delayed conjugation causing neonatal jaundice OS             |
| 15 | 37776  | Q446100 Transitory neonatal hypernatraemia                           |
| 16 | 91557  | Q406z00 Neonatal dacryocystitis or conjunctivitis NOS                |
| 17 |        |                                                                      |
| 18 | 23566  | Q490.00 Neonatal cardiac failure                                     |
| 19 | 35477  | Qyu5A00 [X]Neonatal jaundice from other+unspcf hepatocellular damage |
| 20 | 28361  | Q436100 Transient neonatal hyperbilirubinaemia                       |
| 21 | 48869  | Qyu5900 [X]Neonatal jaundice due/other specifd excessive haemolysis  |
| 22 |        |                                                                      |
| 23 | 64999  | Q406200 Neonatal dacryocystitis                                      |
| 24 | 55634  | Q442.00 Neonatal myasthenia gravis                                   |
| 25 | 18578  | Q47y200 Neonatal skin infection                                      |
| 26 |        |                                                                      |
| 27 | 20894  | Q444.00 Neonatal hypocalcaemia                                       |
| 28 | 37953  | Q444z00 Neonatal hypocalcaemia NOS                                   |
| 29 | 55689  | Q407500 Neonatal candida septicaemia                                 |
| 30 |        |                                                                      |
| 31 | 104225 | Q434100 Giant cell hepatitis causing neonatal jaundice               |
| 32 | 39574  | Q406512 Neonatal conjunctivitis due to other bacteria                |
| 33 | 37045  | Q406511 Neonatal dacryocystitis due to other bacteria                |
| 34 | 68264  | Q406600 Neonatal dacryocystitis or conjunctivitis due to virus       |
| 35 |        |                                                                      |
| 36 | 54971  | Q446.00 Other transitory neonatal electrolyte disturbance            |
| 37 | 66985  | Q433600 Neonatal jaundice with Gilbert's syndrome                    |
| 38 | 39164  | Q430000 Neonatal jaundice + glucose-6-phosphate dehydrogenase defic. |
| 39 | 99435  | N000500 Neonatal lupus erythematosus                                 |
| 40 |        |                                                                      |
| 41 | 6097   | Q40y100 Neonatal urinary tract infection                             |
| 42 | 40869  | Qyu5B00 [X]Neonatal jaundice from other specified causes             |
| 43 | 57203  | Q445.00 Neonatal hypomagnesaemia                                     |
| 44 |        |                                                                      |
| 45 | 106854 | Q451100 Trans neonatal thrombocyto due to idopath matern thrombocyto |
| 46 | 54169  | Q491.00 Neonatal cardiac dysrhythmia                                 |
| 47 | 105058 | Qyu3300 [X]Other neonatal aspiration syndromes                       |
| 48 | 109912 | Qyu6200 [X]Other neonatal hypocalcaemia                              |
| 49 |        |                                                                      |
| 50 | 49462  | Q41y200 Neonatal haematemesis                                        |
| 51 | 110458 | Q32..00 Neonatal respiratory distress syndrome                       |
| 52 | 13301  | Q478.00 Neonatal erythema toxicum                                    |
| 53 |        |                                                                      |
| 54 | 94612  | Q433500 Neonatal jaundice with Dubin-Johnson syndrome                |
| 55 | 7475   | ZV29212 [V]Neonatal care on NNU                                      |
| 56 | 47540  | ZV29211 [V]Neonatal care on ITU                                      |
| 57 |        |                                                                      |
| 58 | 68708  | Q406311 Neonatal dacryocystitis due to E.Coli                        |
| 59 | 89700  | Q406312 Neonatal conjunctivitis due to E.coli                        |
| 60 | 71441  | Q451.00 Transient neonatal thrombocytopenia                          |



|    |        |         |                                                              |
|----|--------|---------|--------------------------------------------------------------|
| 1  |        |         |                                                              |
| 2  |        |         |                                                              |
| 3  |        |         |                                                              |
| 4  | 63790  | Q46y000 | Neonatal peritonitis NOS                                     |
| 5  | 72975  | Qyu6000 | [X]Other neonatal hypoglycaemia                              |
| 6  | 96590  | 67AD.11 | Neonatal feeding advice                                      |
| 7  | 90526  | Q444011 | Neonatal cows' milk hypocalcaemia                            |
| 8  | 71986  | Q446400 | Transitory neonatal hypokalaemia                             |
| 9  | 71532  | Q406500 | Neonatal dacryocystitis/conjunctivitis due to other bacteria |
| 10 | 6883   | Q317000 | Perinatal bronchopulmonary dysplasia                         |
| 11 | 94812  | Qyu3A00 | [X]Oth cardiovascular disorders originating/perinatal period |
| 12 | 54248  | Q415.00 | Perinatal adrenal haemorrhage                                |
| 13 | 21461  | Q4...00 | Other perinatal conditions                                   |
| 14 | 45002  | Q412.00 | Perinatal subarachnoid haemorrhage                           |
| 15 | 87844  | 7F2A000 | Obstetric umbilical artery Doppler                           |
| 16 | 41899  | L240000 | Congenital abnormality of uterus affecting obstetric care    |
| 17 | 25731  | Z27..00 | Obstetric investigative observation                          |
| 18 | 101334 | 8HQ2000 | Referral for obstetric ultrasound scan                       |
| 19 | 32913  | Z28..00 | Obstetric pelvic observation                                 |
| 20 | 34677  | 7F23000 | Immed repair obstetric laceration of uterus or cervix uteri  |
| 21 | 58517  | L244012 | Rectocele affecting obstetric care                           |
| 22 | 29087  | 7F25z00 | Obstetric monitoring NOS                                     |
| 23 | 35601  | 7F23z00 | Immediate repair of obstetric laceration NOS                 |
| 24 | 13700  | ZL5D100 | Referral to obstetrician                                     |
| 25 | 13317  | Z7...00 | Obstetric examination                                        |
| 26 | 110628 | L43y.11 | Fat embolism - obstetric                                     |
| 27 | 34046  | 7F2..00 | Other obstetric operations                                   |
| 28 | 60507  | L35z000 | Obstetric trauma NOS, unspecified                            |
| 29 | 56727  | 5392    | Obstetric X-ray - placenta                                   |
| 30 | 59623  | L35..00 | Other obstetric trauma                                       |
| 31 | 52679  | L417.00 | Obstetric cerebral venous thrombosis                         |
| 32 | 13039  | L383.00 | Obstetric toxic reaction to local anaesthesia                |
| 33 | 20907  | L244011 | Cystocele affecting obstetric care                           |
| 34 | 72298  | L355.00 | Other obstetric pelvic organ damage                          |
| 35 | 102027 | L35yz00 | Other obstetric trauma NOS                                   |
| 36 | 34210  | L240011 | Bicornuate uterus affecting obstetric care                   |
| 37 | 85951  | 7F28z00 | Other non routine obstetric scan NOS                         |
| 38 | 34086  | 7Fz..00 | Obstetric operations NOS                                     |
| 39 | 67257  | L35y.00 | Other obstetric trauma OS                                    |
| 40 | 39036  | 7F...00 | Obstetric operations                                         |
| 41 | 11268  | 7F23.12 | Immediate suture of obstetric laceration                     |
| 42 | 59059  | L433.12 | Septic obstetric embolism                                    |
| 43 | 14970  | 7F23100 | Immed repair obstetric laceration perineum & anal sphincter  |
| 44 | 68557  | L353000 | Obstetric laceration of cervix unspecified                   |
| 45 | 73797  | L353z00 | Obstetric laceration of cervix NOS                           |
| 46 | 101752 | L391000 | Obstetric shock unspecified                                  |
| 47 | 85244  | 7F2B.00 | Obstetric ultrasound monitoring                              |
| 48 | 95698  | 7F28y00 | Other specified other non routine obstetric scan             |
| 49 |        |         |                                                              |
| 50 |        |         |                                                              |
| 51 |        |         |                                                              |
| 52 |        |         |                                                              |
| 53 |        |         |                                                              |
| 54 |        |         |                                                              |
| 55 |        |         |                                                              |
| 56 |        |         |                                                              |
| 57 |        |         |                                                              |
| 58 |        |         |                                                              |
| 59 |        |         |                                                              |
| 60 |        |         |                                                              |

|    |        |         |                                                              |
|----|--------|---------|--------------------------------------------------------------|
| 1  |        |         |                                                              |
| 2  |        |         |                                                              |
| 3  |        |         |                                                              |
| 4  | 54473  | L244000 | Other uterine/pelvic floor abnormal affecting obstetric care |
| 5  | 85245  | 7F26z00 | Routine obstetric scan NOS                                   |
| 6  | 55573  | 8HJ7.00 | Obstetric self-referral                                      |
| 7  | 88229  | 7F2A.00 | Obstetric Doppler studies                                    |
| 8  | 78449  | 7F28.00 | Other non routine obstetric scan                             |
| 9  | 68966  | Lyu7.00 | [X]Other obstetric conditions, not elsewhere classified      |
| 10 | 105817 | 9381    | Obstetric coop card issued                                   |
| 11 | 93136  | L241000 | Tumour of uterine body affecting obstetric care              |
| 12 | 86011  | 7F26.00 | Routine obstetric scan                                       |
| 13 | 35558  | 584..12 | U-S scan - obstetric, diagn.                                 |
| 14 | 55750  | L353.00 | Obstetric laceration of cervix                               |
| 15 | 65231  | 9384    | Obstetric coop card updated                                  |
| 16 | 106154 | 7F2Ay00 | Other specified obstetric Doppler studies                    |
| 17 | 109880 | 7F2Az11 | Obstetric doppler ultrasound NOS                             |
| 18 | 48200  | 8HMN.00 | Listed for Obstetric admission                               |
| 19 | 51929  | L354.11 | High vaginal laceration - obstetric                          |
| 20 | 34843  | L352.11 | Inversion of uterus - obstetric                              |
| 21 | 44286  | ZL1C200 | Under care of obstetrician                                   |
| 22 | 4797   | 5842    | U-S obstetric scan normal                                    |
| 23 | 49661  | 7Fy..00 | Other specified obstetric operations                         |
| 24 | 47156  | L357.00 | Obstetric trauma causing pelvic haematoma                    |
| 25 | 26698  | 27Z..00 | Obstetric examination NOS                                    |
| 26 | 104979 | L354z00 | Obstetric high vaginal laceration NOS                        |
| 27 | 94444  | L352z00 | Obstetric inversion of uterus NOS                            |
| 28 | 2382   | 584Z.00 | U-S obstetric diagn. scan NOS                                |
| 29 | 71742  | L354000 | Obstetric high vaginal laceration unspecified                |
| 30 | 20826  | L241011 | Uterine fibroid affecting obstetric care                     |
| 31 | 13318  | 271..11 | O/E - fundus size - obstetric                                |
| 32 | 94059  | 7F2Az00 | Obstetric Doppler studies NOS                                |
| 33 | 28730  | L355.11 | Bladder injury - obstetric                                   |
| 34 | 27916  | L353.12 | Tear of cervix - obstetric                                   |
| 35 | 86021  | 7F24.00 | Other obstetric operations                                   |
| 36 | 22929  | 8H3C.00 | Non-urgent obstetric admission                               |
| 37 | 105146 | 7F2Ay11 | Other specified obstetric doppler ultrasound                 |
| 38 | 69458  | L354.00 | Obstetric high vaginal laceration                            |
| 39 | 33352  | L352.00 | Obstetric inversion of uterus                                |
| 40 | 23800  | 7F23.11 | Immediate repair of obstetric tear                           |
| 41 | 29685  | 5843    | U-S obstetric scan abnormal                                  |
| 42 | 70607  | 7F23300 | Immediate repair of minor obstetric laceration               |
| 43 | 24655  | 8H27.00 | Admit obstetric emergency                                    |
| 44 | 106067 | L246000 | Other cervical abnormality affecting obstetric care          |
| 45 | 53094  | 7F25y00 | Other specified obstetric monitoring                         |
| 46 | 98057  | L248000 | Vulval abnormality affecting obstetric care                  |
| 47 | 36959  | L391.00 | Obstetric shock                                              |
| 48 | 17911  | L416.11 | Piles - obstetric                                            |
| 49 |        |         |                                                              |
| 50 |        |         |                                                              |
| 51 |        |         |                                                              |
| 52 |        |         |                                                              |
| 53 |        |         |                                                              |
| 54 |        |         |                                                              |
| 55 |        |         |                                                              |
| 56 |        |         |                                                              |
| 57 |        |         |                                                              |
| 58 |        |         |                                                              |
| 59 |        |         |                                                              |
| 60 |        |         |                                                              |

|    |        |         |                                                            |
|----|--------|---------|------------------------------------------------------------|
| 1  |        |         |                                                            |
| 2  |        |         |                                                            |
| 3  | 19800  | 584..00 | Ultrasound in obstetric diagn.                             |
| 4  | 62012  | 7F2z.00 | Other obstetric operations NOS                             |
| 5  | 60870  | 938Z.00 | Obstetric coop card NOS                                    |
| 6  | 20591  | 539..00 | Abdominal obstetric X-ray                                  |
| 7  | 23169  | 539Z.00 | Abdominal obstetric X-ray NOS                              |
| 8  | 98639  | L43zz00 | Obstetric pulmonary embolism NOS                           |
| 9  | 101944 | L43z000 | Obstetric pulmonary embolism NOS, unspecified              |
| 10 | 34533  | 8HV6.00 | Private referral to obstetrician                           |
| 11 | 35197  | 8HLN.00 | Obstetric D.V. done                                        |
| 12 | 104205 | 7F2A100 | Obstetric uterine artery Doppler                           |
| 13 | 102802 | 7F2By00 | Other specified obstetric ultrasound monitoring            |
| 14 | 12625  | 7F25.00 | Obstetric monitoring                                       |
| 15 | 57891  | 7F23.00 | Immediate repair of obstetric laceration                   |
| 16 | 54582  | L35zz00 | Obstetric trauma NOS                                       |
| 17 | 13965  | 584..13 | Ultra-sound scan - obstetric                               |
| 18 | 96343  | 7F26y00 | Other specified routine obstetric scan                     |
| 19 | 100451 | 7F24100 | Obstetric uterine tamponade                                |
| 20 | 27019  | 5841    | U-S obstetric scan requested                               |
| 21 | 87848  | 7F2Bz00 | Obstetric ultrasound monitoring NOS                        |
| 22 | 91278  | L357000 | Obstetric pelvic haematoma unspecified                     |
| 23 | 36340  | 938..00 | Obstetric coop card                                        |
| 24 | 19327  | L411.11 | Perineal obstetric varicose veins                          |
| 25 | 20496  | L411.12 | Vulval obstetric varicose veins                            |
| 26 | 27650  | L384.00 | Obstetric spinal and epidural anaesthesia-induced headache |
| 27 | 107037 | Lyu4C00 | [X]Other specified obstetric trauma                        |
| 28 | 43628  | L247011 | Septate vagina affecting obstetric care                    |
| 29 | 11988  | 8H57.00 | Obstetric referral                                         |
| 30 | 11204  | 271..12 | O/E - uterus size - obstetric                              |
| 31 | 48311  | Z261.00 | Observation of gestational sac                             |
| 32 | 43004  | Q13..00 | Light for gestational age                                  |
| 33 | 22385  | Z22C300 | Length of gestation                                        |
| 34 | 91915  | 7M0f400 | From 9 weeks to <14 weeks gestational age                  |
| 35 | 50704  | Q113.00 | Light for gestational age                                  |
| 36 | 69250  | L169000 | Herpes gestationis unspecified                             |
| 37 | 59681  | L41z511 | Gestational phlebitis NOS                                  |
| 38 | 34265  | L16C000 | Gestational proteinuria                                    |
| 39 | 60330  | L19..00 | Complications specific to multiple gestation               |
| 40 | 34505  | 62X3.00 | Full term gestation - 40 weeks                             |
| 41 | 90884  | 7M0f200 | 9 - 13 weeks gestational age                               |
| 42 | 29565  | L161.13 | Gestational oedema                                         |
| 43 | 102435 | 8CE0000 | Gestational diabetes information leaflet given             |
| 44 | 34484  | 62X1.00 | Gestation = 24 weeks                                       |
| 45 | 49663  | Z261100 | Gestational sac present                                    |
| 46 | 7515   | L169.00 | Herpes gestationis                                         |
| 47 | 37201  | L16C100 | Gestational oedema with proteinuria                        |
| 48 |        |         |                                                            |
| 49 |        |         |                                                            |
| 50 |        |         |                                                            |
| 51 |        |         |                                                            |
| 52 |        |         |                                                            |
| 53 |        |         |                                                            |
| 54 |        |         |                                                            |
| 55 |        |         |                                                            |
| 56 |        |         |                                                            |
| 57 |        |         |                                                            |
| 58 |        |         |                                                            |
| 59 |        |         |                                                            |
| 60 |        |         |                                                            |

|        |         |                                              |
|--------|---------|----------------------------------------------|
| 50081  | L41z512 | Gestational phlebopathy NOS                  |
| 58971  | L41z513 | Gestational thrombosis NOS                   |
| 16975  | L21..11 | Gestation - multiple                         |
| 97682  | 7M0fy00 | Other specified gestational age              |
| 95702  | 7M0f300 | Under 9 weeks gestational age                |
| 108013 | ZC2CB00 | Dietary advice for gestational diabetes      |
| 26556  | 62X2.00 | Gestation >24 weeks                          |
| 26555  | 62X0.00 | Gestation <24 weeks                          |
| 111075 | Qyu1200 | [X]Other 'heavy for gestational age' infants |
| 86327  | 7M0f000 | Over 20 weeks gestational age                |
| 91101  | 7M0fz00 | Gestational age NOS                          |
| 103954 | 62X5.00 | Length of gestation at time of test          |
| 2664   | L180900 | Gestational diabetes mellitus                |
| 95703  | 7M0f100 | 14 - 20 weeks gestational age                |
| 8446   | L180811 | Gestational diabetes mellitus                |
| 40703  | L169z00 | Herpes gestationis NOS                       |
| 43805  | Z22C312 | Duration of gestation                        |
| 18810  | 62X..00 | Length of gestation                          |
| 103090 | Lyu3000 | [X]Other multiple gestation                  |
| 55352  | 7M0f.00 | Gestational age                              |
| 21526  | L123500 | Gestational hypertension                     |

| colour | condition             | time frame          |
|--------|-----------------------|---------------------|
| green  | pregnancy             | 7/12 mths           |
| blue   | birth                 | <21 days postpartum |
| yellow | abortion/ miscarriage | <5 days             |

#### Appendix 4: Additional CPRD browser pregnancy medcodes

| Medcode | Readcode | Readterm                                                     |
|---------|----------|--------------------------------------------------------------|
| 6298    | ZV28.00  | [V]Antenatal screening                                       |
| 94405   | L413100  | Antenatal deep vein thrombosis - delivered                   |
| 99188   | L173.00  | Maternal tuberculosis in pregnancy/childbirth/puerperium     |
| 63781   | L410z00  | Varicose veins of legs in pregnancy and puerperium NOS       |
| 45870   | Ly...00  | Complications of pregnancy,childbirth or the puerperium OS   |
| 52106   | L412z00  | Superficial thrombophlebitis in pregnancy and puerperium NOS |
| 86991   | L172000  | Other maternal venereal disease, unspec pregnancy/puerperium |
| 4243    | L466.00  | Galactorrhoea in pregnancy and the puerperium                |
| 70092   | L460.00  | Retracted nipple in pregnancy, the puerperium or lactation   |

|    |        |         |                                                              |
|----|--------|---------|--------------------------------------------------------------|
| 1  |        |         |                                                              |
| 2  |        |         |                                                              |
| 3  |        |         |                                                              |
| 4  | 16995  | L462.00 | Breast engorgement in pregnancy, the puerperium or lactation |
| 5  | 59573  | L176500 | Viral hepatitis comp pregnancy, childbirth & the puerperium  |
| 6  | 88361  | L248.11 | Persistent hymen in pregnancy, childbirth and the puerperium |
| 7  | 31610  | L248.13 | Vulval abnormality in pregnancy/childbirth/puerperium        |
| 8  | 92998  | Lyu1.00 | [X]Oedema,proteinuria+hypertens in pregnancy,childbrth,puerp |
| 9  | 20597  | 12G4.00 | FH: Multiple pregnancy                                       |
| 10 | 28446  | Lz...00 | Complications of pregnancy,childbirth and the puerperium NOS |
| 11 | 63835  | L247z11 | Septate vagina in pregnancy/childbirth/puerperium NOS        |
| 12 | 109550 | L416400 | Haemorrhoids in pregnancy and puerperium with p/n comp       |
| 13 | 59276  | L032.00 | Ovarian pregnancy                                            |
| 14 | 65579  | L415.00 | Other phlebitis and thrombosis in pregnancy and puerperium   |
| 15 | 93143  | L121.00 | Renal hypertension in pregnancy/childbirth/puerperium        |
| 16 | 60154  | L24..00 | Pelvic soft tissue abnormality in pregnancy/childbirth/puerp |
| 17 | 71717  | L121100 | Renal hypertension in pregnancy/childbirth/puerp - delivered |
| 18 | 24006  | L466100 | Galactorrhoea in pregnancy and the puerperium - delivered    |
| 19 | 44069  | L18..00 | Other medical condition in pregnancy/childbirth/puerperium   |
| 20 | 47918  | L090300 | Salpingitis following abortive pregnancy                     |
| 21 | 11152  | L...00  | Complications of pregnancy, childbirth and the puerperium    |
| 22 | 63644  | L181z00 | Thyroid dysfunction in pregnancy/childbirth/puerperium NOS   |
| 23 | 96004  | L183z00 | Drug dependence during pregnancy/childbirth/puerperium NOS   |
| 24 | 1771   | L182.00 | Anaemia during pregnancy, childbirth and the puerperium      |
| 25 | 46744  | L41..00 | Venous complications of pregnancy and the puerperium         |
| 26 | 90329  | L416z00 | Haemorrhoids in pregnancy and the puerperium NOS             |
| 27 | 41050  | Z2...00 | Pregnancy, childbirth and puerperium observations            |
| 28 | 39550  | L244z11 | Cystocele in pregnancy, childbirth or the puerperium NOS     |
| 29 | 64147  | L244z12 | Rectocele in pregnancy, childbirth or the puerperium NOS     |
| 30 | 15297  | L461400 | Cracked nipple in pregnancy/puerperium/lactation + p/n comp  |
| 31 | 73717  | L463300 | Other breast disorder in pregnancy/puerperium/lact +a/n comp |
| 32 | 98264  | L165200 | Asymptomatic bacteriuria in pregnancy - del with p/n comp    |
| 33 | 53310  | L1z..00 | Complications of pregnancy/childbirth/puerperium NOS         |
| 34 | 103144 | L416300 | Haemorrhoids in pregnancy and puerperium with a/n comp       |
| 35 | 46756  | L184.00 | Mental disorders in pregnancy, childbirth and the puerperium |
| 36 | 26023  | L411300 | VV's of perineum/vulva in pregnancy/puerperium + a/n comp    |
| 37 | 58140  | L173000 | Maternal tuberculosis,unspec whether in pregnancy/puerperium |
| 38 | 73089  | L460000 | Retracted nipple in pregnancy/puerperium/lactation unspec    |
| 39 | 67006  | L096400 | Pulmonary embolism following abortive pregnancy              |
| 40 | 65085  | L092000 | Bladder damage following abortive pregnancy                  |
| 41 | 23840  | L090z00 | Septicaemia NOS following abortive pregnancy                 |
| 42 | 51359  | L090200 | Pelvic peritonitis following abortive pregnancy              |
| 43 | 106097 | L09y.00 | Other specified complication following abortive pregnancy    |
| 44 | 12604  | L120.00 | Benign essential hypertension in pregnancy/childbirth/puerp  |
| 45 |        |         |                                                              |
| 46 |        |         |                                                              |
| 47 |        |         |                                                              |
| 48 |        |         |                                                              |
| 49 |        |         |                                                              |
| 50 |        |         |                                                              |
| 51 |        |         |                                                              |
| 52 |        |         |                                                              |
| 53 |        |         |                                                              |
| 54 |        |         |                                                              |
| 55 |        |         |                                                              |
| 56 |        |         |                                                              |
| 57 |        |         |                                                              |
| 58 |        |         |                                                              |
| 59 |        |         |                                                              |
| 60 |        |         |                                                              |

|    |        |         |                                                              |
|----|--------|---------|--------------------------------------------------------------|
| 1  |        |         |                                                              |
| 2  |        |         |                                                              |
| 3  |        |         |                                                              |
| 4  | 103683 | 8Hki.00 | Referral to teenage pregnancy and parenting support service  |
| 5  | 42091  | L411z00 | Varicose veins of perineum/vulva in pregnancy/puerperium NOS |
| 6  | 96437  | L170000 | Maternal syphilis, unspec whether in pregnancy or puerperium |
| 7  | 20850  | L244.11 | Cystocele in pregnancy, childbirth and the puerperium        |
| 8  | 35903  | L244.12 | Pendulous abdomen in pregnancy,childbirth and the puerperium |
| 9  | 39492  | L244.13 | Rectocele in pregnancy, childbirth and the puerperium        |
| 10 | 71943  | L411000 | VV's of perineum/vulva in pregnancy/puerperium unspecified   |
| 11 | 93583  | L096.00 | Embolism following abortive pregnancy                        |
| 12 | 34182  | 1547    | H/O: medical termination of pregnancy                        |
| 13 | 70422  | L093400 | Uraemia following abortive pregnancy                         |
| 14 | 103222 | L248z11 | Persistent hymen in pregnancy/childbirth/puerperium NOS      |
| 15 | 97296  | L461200 | Cracked nipple in pregnancy/puerp/lact - deliv + p/n comp    |
| 16 | 5541   | 1544    | H/O: ectopic pregnancy                                       |
| 17 | 58982  | L186.00 | Other cardiovascular diseases in pregnancy/childbirth/puerp  |
| 18 | 62886  | L461z00 | Cracked nipple in pregnancy, the puerperium or lactation NOS |
| 19 | 41473  | L183.00 | Drug dependence in pregnancy, childbirth and the puerperium  |
| 20 | 48552  | L010.11 | Anembryonic pregnancy                                        |
| 21 | 33634  | L182z00 | Anaemia during pregnancy/childbirth/puerperium NOS           |
| 22 | 64384  | L180z00 | Diabetes mellitus in pregnancy/childbirth/puerperium NOS     |
| 23 | 25759  | L411.00 | VV's of perineum/vulva in pregnancy/puerperium               |
| 24 | 38556  | 67A7.00 | Pregnancy dental advice                                      |
| 25 | 41718  | L1y..00 | Complications of pregnancy/childbirth/puerperium OS          |
| 26 | 53056  | L246.11 | Polyp of cervix in pregnancy, childbirth and the puerperium  |
| 27 | 73557  | L188z00 | Abnormal GTT in pregnancy/childbirth/puerperium NOS          |
| 28 | 69012  | L466300 | Galactorrhoea in pregnancy/puerperium with a/n complication  |
| 29 | 57131  | L462100 | Breast engorgement in pregnancy/puerperium/lactation - deliv |
| 30 | 64260  | L18D.00 | Dis nervous syst complic pregnancy,childbirth and puerperium |
| 31 | 59493  | L090400 | Salpingo-oophoritis following abortive pregnancy             |
| 32 | 104656 | Ly2..00 | Sequelae of complication pregnancy childbirth and puerperium |
| 33 | 16046  | L410.00 | Varicose veins of legs in pregnancy and the puerperium       |
| 34 | 72215  | L241z00 | Uterine body tumour in pregnancy/childbirth/puerperium NOS   |
| 35 | 13245  | 12G2.00 | FH: Diabetes in pregnancy                                    |
| 36 | 106736 | 9mK1.00 | Pertussis vaccination in pregnancy invitation second letter  |
| 37 | 66537  | L170100 | Maternal syphilis during pregnancy - baby delivered          |
| 38 | 92415  | L095.00 | Shock following abortive pregnancy                           |
| 39 | 35273  | L097.00 | Readmission for abortive pregnancy (NHS codes)               |
| 40 | 20152  | L090y00 | Sepsis NOS following abortion/ectopic/molar pregnancy        |
| 41 | 50009  | L461100 | Cracked nipple in pregnancy/puerperium/lactation - delivered |
| 42 | 71162  | L16y100 | Other pregnancy complication - delivered                     |
| 43 | 102635 | 8Cg..00 | Pregnancy termination care                                   |
| 44 | 104806 | L463100 | Other breast disorder in pregnancy/puerperium/lact - deliv   |
| 45 |        |         |                                                              |
| 46 |        |         |                                                              |
| 47 |        |         |                                                              |
| 48 |        |         |                                                              |
| 49 |        |         |                                                              |
| 50 |        |         |                                                              |
| 51 |        |         |                                                              |
| 52 |        |         |                                                              |
| 53 |        |         |                                                              |
| 54 |        |         |                                                              |
| 55 |        |         |                                                              |
| 56 |        |         |                                                              |
| 57 |        |         |                                                              |
| 58 |        |         |                                                              |
| 59 |        |         |                                                              |
| 60 |        |         |                                                              |

|    |        |         |                                                              |
|----|--------|---------|--------------------------------------------------------------|
| 1  |        |         |                                                              |
| 2  |        |         |                                                              |
| 3  |        |         |                                                              |
| 4  | 63319  | L096.11 | Embolus following abortive pregnancy                         |
| 5  | 94527  | L16y400 | Other pregnancy complication with postnatal complication     |
| 6  | 9170   | L12..00 | Hypertension complicating pregnancy/childbirth/puerperium    |
| 7  | 73432  | L18z100 | Medical condition NOS during pregnancy - baby delivered      |
| 8  | 104466 | L179.00 | HIV disease complicating pregnancy childbirth puerperium     |
| 9  | 47197  | L410400 | Varicose veins of legs in pregnancy/puerperium + p/n comp    |
| 10 | 54761  | L170.00 | Maternal syphilis in pregnancy/childbirth/puerperium         |
| 11 | 63773  | L416100 | Haemorrhoids in pregnancy and the puerperium - delivered     |
| 12 | 101499 | L246z12 | Stenosis of cervix in pregnancy/childbirth/puerperium NOS    |
| 13 | 33255  | L246z11 | Polyp of cervix in pregnancy/childbirth/puerperium NOS       |
| 14 | 56542  | L240z11 | Bicornuate uterus in pregnancy, childbirth or puerperium NOS |
| 15 | 41016  | L247.11 | Septate vagina in pregnancy, childbirth and the puerperium   |
| 16 | 40262  | L247.13 | Vaginal abnormality in pregnancy/childbirth/puerperium       |
| 17 | 6478   | L188.00 | Abnormal glucose tolerance test in pregnancy/childb/puerp    |
| 18 | 59910  | L17z.00 | Maternal infect/parasitic dis NOS in pregnancy/childb/puerp  |
| 19 | 62052  | L092500 | Uterus damage following abortive pregnancy                   |
| 20 | 97836  | L242100 | Uterine operation scar in pregnancy/childbirth/puerp - deliv |
| 21 | 99889  | L16A200 | Glycosuria during pregnancy - delivered with p/n comp        |
| 22 | 98981  | L166400 | Genitourinary tract infection in pregnancy with p/n comp     |
| 23 | 59601  | L462200 | Breast engorgement in pregnancy/puerp/lact - del + p/n comp  |
| 24 | 16017  | L166100 | Genitourinary tract infection in pregnancy - delivered       |
| 25 | 10205  | ZG9..00 | Advice relating to pregnancy and fertility                   |
| 26 | 105500 | L41yz00 | Other venous complication of pregnancy and puerperium NOS    |
| 27 | 41283  | L187.00 | Orthopaedic disorders in pregnancy/childbirth/puerperium     |
| 28 | 63379  | L183100 | Drug dependence during pregnancy - baby delivered            |
| 29 | 38871  | L246.00 | Other cervical abnormality in pregnancy/childbirth/puerp     |
| 30 | 47686  | L181.00 | Thyroid dysfunction in pregnancy/childbirth/puerperium       |
| 31 | 23691  | L172.00 | Other venereal diseases in pregnancy/childbirth/puerperium   |
| 32 | 107197 | L170z00 | Maternal syphilis in pregnancy/childbirth/puerperium NOS     |
| 33 | 68215  | L188100 | Abnormal GTT during pregnancy - baby delivered               |
| 34 | 40723  | L12z.00 | Unspecified hypertension in pregnancy/childbirth/puerperium  |
| 35 | 104542 | 67AH.00 | Education about toxoplasmosis precautions during pregnancy   |
| 36 | 97741  | L461000 | Cracked nipple in pregnancy/puerperium/lactation unspecified |
| 37 | 67035  | L123200 | Transient hypertension of pregnancy - deliv with p/n comp    |
| 38 | 64125  | L09yz00 | Other specified complication NOS follow abortive pregnancy   |
| 39 | 57640  | L242z00 | Uterine operation scar in pregnancy/childbirth/puerp NOS     |
| 40 | 2924   | 7E06600 | Hysterotomy and termination of pregnancy                     |
| 41 | 27952  | ZV13900 | [V]PH comp of pregnancy, childbirth and the puerperium       |
| 42 | 53141  | L241.00 | Tumour of uterine body in pregnancy/childbirth/puerperium    |
| 43 | 35928  | L463000 | Other breast disorder in pregnancy/puerperium/lact unspec    |
| 44 | 40121  | 12G1.00 | FH: Raised B.P. in pregnancy                                 |
| 45 |        |         |                                                              |
| 46 |        |         |                                                              |
| 47 |        |         |                                                              |
| 48 |        |         |                                                              |
| 49 |        |         |                                                              |
| 50 |        |         |                                                              |
| 51 |        |         |                                                              |
| 52 |        |         |                                                              |
| 53 |        |         |                                                              |
| 54 |        |         |                                                              |
| 55 |        |         |                                                              |
| 56 |        |         |                                                              |
| 57 |        |         |                                                              |
| 58 |        |         |                                                              |
| 59 |        |         |                                                              |
| 60 |        |         |                                                              |

|    |        |         |                                                              |
|----|--------|---------|--------------------------------------------------------------|
| 1  |        |         |                                                              |
| 2  |        |         |                                                              |
| 3  |        |         |                                                              |
| 4  | 11359  | L180.00 | Diabetes mellitus during pregnancy/childbirth/puerperium     |
| 5  | 33708  | L182100 | Anaemia during pregnancy - baby delivered                    |
| 6  | 58686  | L462000 | Breast engorgement in pregnancy/puerperium/lactation unspec  |
| 7  | 6560   | L416.00 | Haemorrhoids in pregnancy and the puerperium                 |
| 8  | 98133  | 9Ea0.00 | Risk life pregnant woman greater than if pregnancy terminatd |
| 9  | 32950  | L03y100 | Cornual pregnancy                                            |
| 10 | 105006 | Q48G.00 | Complication termination pregnancy affecting fetus newborn   |
| 11 | 107708 | L415100 | Other phlebitis/thrombosis in pregnancy/puerperium - deliv   |
| 12 | 28225  | L240.11 | Bicornuate uterus in pregnancy, childbirth and puerperium    |
| 13 | 49789  | L240.12 | Double uterus in pregnancy, childbirth and the puerperium    |
| 14 | 56217  | L416000 | Haemorrhoids in pregnancy and the puerperium unspecified     |
| 15 | 99154  | L410000 | Varicose veins of legs in pregnancy/puerperium unspecified   |
| 16 | 96724  | L162100 | Unspecified renal disease in pregnancy - delivered           |
| 17 | 101260 | L10z100 | Early pregnancy haemorrhage NOS - delivered                  |
| 18 | 35859  | 67A5.00 | Pregnancy alcohol advice                                     |
| 19 | 42598  | L175.00 | Maternal rubella in pregnancy, childbirth and the puerperium |
| 20 | 72437  | L248z00 | Vulval abnormality in pregnancy/childbirth/puerperium NOS    |
| 21 | 101272 | L462300 | Breast engorgement in pregnancy/puerperium/lact + a/n comp   |
| 22 | 92362  | L240z00 | Congenital abnormality uterus in pregnancy/childb/puerp NOS  |
| 23 | 63362  | L091100 | Defibrination syndrome following abortive pregnancy          |
| 24 | 73311  | L41z.00 | Venous complications of pregnancy and puerperium NOS         |
| 25 | 34639  | L180100 | Diabetes mellitus during pregnancy - baby delivered          |
| 26 | 43754  | L18z.00 | Medical condition NOS in pregnancy/childbirth/puerperium     |
| 27 | 30948  | L150100 | Post-term pregnancy - delivered                              |
| 28 | 73647  | L188000 | Abnormal GTT - unspec whether during pregnancy/puerperium    |
| 29 | 54681  | L189.00 | Dis resp syst comp pregnancy, childbirth & puerperium        |
| 30 | 99365  | L460z00 | Retracted nipple in pregnancy/puerperium/lactation NOS       |
| 31 | 64649  | L175100 | Maternal rubella during pregnancy - baby delivered           |
| 32 | 28611  | L461.00 | Cracked nipple in pregnancy, the puerperium or lactation     |
| 33 | 61144  | L463.00 | Other breast disorder in pregnancy/puerperium/lactation      |
| 34 | 50571  | L090100 | Parametritis following abortive pregnancy                    |
| 35 | 70342  | L123400 | Transient hypertension of pregnancy + postnatal complication |
| 36 | 99422  | L187000 | Orthopaedic disorder - unsp whether in pregnancy/puerperium  |
| 37 | 32007  | L090.00 | Genital or pelvic infection following abortive pregnancy     |
| 38 | 45242  | L241.11 | Uterine fibroids in pregnancy, childbirth and the puerperium |
| 39 | 7270   | 12G4.11 | FH: Twin pregnancy                                           |
| 40 | 38440  | L462z00 | Breast engorgement in pregnancy/puerperium/lactation NOS     |
| 41 | 89557  | L092300 | Cervix damage following abortive pregnancy                   |
| 42 | 41961  | L171.00 | Maternal gonorrhoea during pregnancy/childbirth/puerperium   |
| 43 | 50908  | L242.00 | Uterine scar from previous surgery in pregnancy/childb/puerp |
| 44 | 16752  | ZV72900 | [V]Pregnancy examination and test                            |
| 45 |        |         |                                                              |
| 46 |        |         |                                                              |
| 47 |        |         |                                                              |
| 48 |        |         |                                                              |
| 49 |        |         |                                                              |
| 50 |        |         |                                                              |
| 51 |        |         |                                                              |
| 52 |        |         |                                                              |
| 53 |        |         |                                                              |
| 54 |        |         |                                                              |
| 55 |        |         |                                                              |
| 56 |        |         |                                                              |
| 57 |        |         |                                                              |
| 58 |        |         |                                                              |
| 59 |        |         |                                                              |
| 60 |        |         |                                                              |



|    |        |         |                                                              |
|----|--------|---------|--------------------------------------------------------------|
| 1  |        |         |                                                              |
| 2  |        |         |                                                              |
| 3  |        |         |                                                              |
| 4  | 14765  | L462400 | Breast engorgement in pregnancy/puerperium/lact + p/n comp   |
| 5  | 15633  | L182000 | Anaemia - unspecified whether in pregnancy or the puerperium |
| 6  | 73757  | L247z00 | Vaginal abnormality in pregnancy/childbirth/puerperium NOS   |
| 7  | 99389  | L460300 | Retracted nipple in pregnancy/puerperium/lact with a/n comp  |
| 8  | 24303  | 9Ea..00 | Reason for termination of pregnancy                          |
| 9  | 55757  | L16y200 | Other pregnancy complication - delivered with postnatal comp |
| 10 | 67635  | L180000 | Diabetes mellitus - unspec whether in pregnancy/puerperium   |
| 11 | 51639  | L241z11 | Uterine fibroid in pregnancy/childbirth/puerperium NOS       |
| 12 | 40978  | Z22A700 | Surrogate pregnancy                                          |
| 13 | 18944  | 7E07011 | Dilation cervix uteri & curettage for termination pregnancy  |
| 14 | 54107  | L10z000 | Early pregnancy haemorrhage NOS unspecified                  |
| 15 | 103610 | 9NkN.00 | Seen in early pregnancy unit                                 |
| 16 | 70476  | L132100 | Late pregnancy vomiting - delivered                          |
| 17 | 23456  | L412.00 | Superficial thrombophlebitis in pregnancy and the puerperium |
| 18 | 67377  | L463z00 | Other breast disorder in pregnancy/puerperium/lactation NOS  |
| 19 | 94736  | L096600 | Septic embolism following abortive pregnancy                 |
| 20 | 94353  | L175000 | Maternal rubella, unspecified whether pregnancy/puerperium   |
| 21 | 64127  | L121000 | Renal hypertension in pregnancy/childbirth/puerp unspecified |
| 22 | 99594  | L415000 | Other phlebitis/thrombosis in pregnancy/puerperium unsp      |
| 23 | 50093  | L093000 | Oliguria following abortive pregnancy                        |
| 24 | 28312  | L466z00 | Galactorrhoea in pregnancy and the puerperium NOS            |
| 25 | 72944  | L176.00 | Other maternal viral dis. in pregnancy/childbirth/puerperium |
| 26 | 49390  | L174.00 | Maternal malaria in pregnancy, childbirth and the puerperium |
| 27 | 97629  | L246z00 | Other cervical abnormality in pregnancy/childbirth/puerp NOS |
| 28 | 57419  | L167100 | Liver disorder in pregnancy - delivered                      |
| 29 | 73927  | L175z00 | Maternal rubella in pregnancy/childbirth/puerperium NOS      |
| 30 | 54089  | L466000 | Galactorrhoea in pregnancy and the puerperium unspecified    |
| 31 | 94718  | L121z00 | Renal hypertension in pregnancy/childbirth/puerperium NOS    |
| 32 | 105918 | L09y400 | Urinary tract infection following abortive pregnancy         |
| 33 | 30326  | L090000 | Endometritis following abortive pregnancy                    |
| 34 | 38022  | Z22CF00 | Date symptom of pregnancy first noted                        |
| 35 | 69703  | L185100 | Congenital cardiovasc dis in pregnancy - baby delivered      |
| 36 | 69911  | L18zz00 | Medical condition NOS in pregnancy/childb/puerp NOS          |
| 37 | 35680  | Q423.00 | Hydrops fetalis due to isoimmunisation                       |
| 38 | 59296  | L140000 | Threatened premature labour unspecified                      |
| 39 |        |         |                                                              |
| 40 |        |         |                                                              |
| 41 |        |         |                                                              |
| 42 |        |         |                                                              |
| 43 |        |         |                                                              |
| 44 |        |         |                                                              |
| 45 |        |         |                                                              |
| 46 |        |         |                                                              |
| 47 |        |         |                                                              |
| 48 |        |         |                                                              |
| 49 |        |         |                                                              |
| 50 |        |         |                                                              |
| 51 |        |         |                                                              |
| 52 |        |         |                                                              |
| 53 |        |         |                                                              |
| 54 |        |         |                                                              |
| 55 |        |         |                                                              |
| 56 |        |         |                                                              |
| 57 |        |         |                                                              |
| 58 |        |         |                                                              |
| 59 |        |         |                                                              |
| 60 |        |         |                                                              |

STROBE Statement—Checklist of items that should be included in reports of *cohort studies*

|                           | Item No | Recommendation                                                                                                                                                                                                                                                                                                                                             |
|---------------------------|---------|------------------------------------------------------------------------------------------------------------------------------------------------------------------------------------------------------------------------------------------------------------------------------------------------------------------------------------------------------------|
| <b>Title and abstract</b> | 1       | (a) Indicate the study's design with a commonly used term in the title or the abstract<br>Retrospective cohort study<br>(b) Provide in the abstract an informative and balanced summary of what was done and what was found<br>done                                                                                                                        |
| <b>Introduction</b>       |         |                                                                                                                                                                                                                                                                                                                                                            |
| Background/rationale      | 2       | Explain the scientific background and rationale for the investigation being reported<br>P4                                                                                                                                                                                                                                                                 |
| Objectives                | 3       | State specific objectives, including any prespecified hypotheses<br>P5                                                                                                                                                                                                                                                                                     |
| <b>Methods</b>            |         |                                                                                                                                                                                                                                                                                                                                                            |
| Study design              | 4       | Present key elements of study design early in the paper<br>Methods<br>P5                                                                                                                                                                                                                                                                                   |
| Setting                   | 5       | Describe the setting, locations, and relevant dates, including periods of recruitment, exposure, follow-up, and data collection<br>Population and data from CPRD<br>P5                                                                                                                                                                                     |
| Participants              | 6       | (a) Give the eligibility criteria, and the sources and methods of selection of participants. Describe methods of follow-up<br>Inclusion criteria<br>P6<br>(b) For matched studies, give matching criteria and number of exposed and unexposed<br>NA                                                                                                        |
| Variables                 | 7       | Clearly define all outcomes, exposures, predictors, potential confounders, and effect modifiers. Give diagnostic criteria, if applicable<br>Outcomes defined<br>P6 and 7<br>Read codes in supplementary file                                                                                                                                               |
| Data sources/measurement  | 8*      | For each variable of interest, give sources of data and details of methods of assessment (measurement). Describe comparability of assessment methods if there is more than one group<br>P5                                                                                                                                                                 |
| Bias                      | 9       | Describe any efforts to address potential sources of bias<br>NA                                                                                                                                                                                                                                                                                            |
| Study size                | 10      | Explain how the study size was arrived at<br>Used all available data in CPRD                                                                                                                                                                                                                                                                               |
| Quantitative variables    | 11      | Explain how quantitative variables were handled in the analyses. If applicable, describe which groupings were chosen and why<br>In methods                                                                                                                                                                                                                 |
| Statistical methods       | 12      | (a) Describe all statistical methods, including those used to control for confounding<br>P6 and 7<br>(b) Describe any methods used to examine subgroups and interactions<br>NA<br>(c) Explain how missing data were addressed<br>NA<br>(d) If applicable, explain how loss to follow-up was addressed<br>NA<br>(e) Describe any sensitivity analyses<br>NA |
| <b>Results</b>            |         |                                                                                                                                                                                                                                                                                                                                                            |
| Participants              | 13*     | (a) Report numbers of individuals at each stage of study—eg numbers potentially eligible, examined for eligibility, confirmed eligible, included in the study, completing follow-up, and analysed<br>P7<br>(b) Give reasons for non-participation at each stage<br>(c) Consider use of a flow diagram                                                      |
| Descriptive data          | 14*     | (a) Give characteristics of study participants (eg demographic, clinical, social) and information on exposures and potential confounders<br>Table 1<br>(b) Indicate number of participants with missing data for each variable of interest                                                                                                                 |

Table 1

| (c) Summarise follow-up time (eg, average and total amount) P7 |     |                                                                                                                                                                                                                                                                                                                                                                                                                                            |
|----------------------------------------------------------------|-----|--------------------------------------------------------------------------------------------------------------------------------------------------------------------------------------------------------------------------------------------------------------------------------------------------------------------------------------------------------------------------------------------------------------------------------------------|
| Outcome data                                                   | 15* | Report numbers of outcome events or summary measures over time Tables                                                                                                                                                                                                                                                                                                                                                                      |
| Main results                                                   | 16  | (a) Give unadjusted estimates and, if applicable, confounder-adjusted estimates and their precision (eg, 95% confidence interval). Make clear which confounders were adjusted for and why they were included NA<br>(b) Report category boundaries when continuous variables were categorized Done<br>(c) If relevant, consider translating estimates of relative risk into absolute risk for a meaningful time period Absolute rates given |
| Other analyses                                                 | 17  | Report other analyses done—eg analyses of subgroups and interactions, and sensitivity analyses All analyses reported                                                                                                                                                                                                                                                                                                                       |
| <b>Discussion</b>                                              |     |                                                                                                                                                                                                                                                                                                                                                                                                                                            |
| Key results                                                    | 18  | Summarise key results with reference to study objectives P9 and 10                                                                                                                                                                                                                                                                                                                                                                         |
| Limitations                                                    | 19  | Discuss limitations of the study, taking into account sources of potential bias or imprecision. Discuss both direction and magnitude of any potential bias P10 and 11                                                                                                                                                                                                                                                                      |
| Interpretation                                                 | 20  | Give a cautious overall interpretation of results considering objectives, limitations, multiplicity of analyses, results from similar studies, and other relevant evidence P11-13                                                                                                                                                                                                                                                          |
| Generalisability                                               | 21  | Discuss the generalisability (external validity) of the study results P10 and 12                                                                                                                                                                                                                                                                                                                                                           |
| <b>Other information</b>                                       |     |                                                                                                                                                                                                                                                                                                                                                                                                                                            |
| Funding                                                        | 22  | Give the source of funding and the role of the funders for the present study and, if applicable, for the original study on which the present article is based P14                                                                                                                                                                                                                                                                          |

\*Give information separately for exposed and unexposed groups.

**Note:** An Explanation and Elaboration article discusses each checklist item and gives methodological background and published examples of transparent reporting. The STROBE checklist is best used in conjunction with this article (freely available on the Web sites of PLoS Medicine at <http://www.plosmedicine.org/>, Annals of Internal Medicine at <http://www.annals.org/>, and Epidemiology at <http://www.epidem.com/>). Information on the STROBE Initiative is available at <http://www.strobe-statement.org>.

# BMJ Open

## Trends in HIV testing in the UK Primary Care setting: A 15 year retrospective cohort study 2000 to 2015

|                                 |                                                                                                                                                                                                                                                                                                                                                                                                                                                                                                                                                                                                                                                                                                                                                                                                                                                                                                                                                                                   |
|---------------------------------|-----------------------------------------------------------------------------------------------------------------------------------------------------------------------------------------------------------------------------------------------------------------------------------------------------------------------------------------------------------------------------------------------------------------------------------------------------------------------------------------------------------------------------------------------------------------------------------------------------------------------------------------------------------------------------------------------------------------------------------------------------------------------------------------------------------------------------------------------------------------------------------------------------------------------------------------------------------------------------------|
| Journal:                        | <i>BMJ Open</i>                                                                                                                                                                                                                                                                                                                                                                                                                                                                                                                                                                                                                                                                                                                                                                                                                                                                                                                                                                   |
| Manuscript ID                   | bmjopen-2018-027744.R1                                                                                                                                                                                                                                                                                                                                                                                                                                                                                                                                                                                                                                                                                                                                                                                                                                                                                                                                                            |
| Article Type:                   | Research                                                                                                                                                                                                                                                                                                                                                                                                                                                                                                                                                                                                                                                                                                                                                                                                                                                                                                                                                                          |
| Date Submitted by the Author:   | 05-Feb-2019                                                                                                                                                                                                                                                                                                                                                                                                                                                                                                                                                                                                                                                                                                                                                                                                                                                                                                                                                                       |
| Complete List of Authors:       | Gompels, Mark; North Bristol NHS Trust, Department of Immunology, Southmead Hospital<br>Michael, Skevi; University of Bristol, School of Mathematics<br>Davies, Charlotte; University of Bristol, Department of Population Health Sciences, Bristol Medical School<br>Jones, Tim; University of Bristol; University Hospitals Bristol NHS Foundation Trust, The National Institute for Health Research Collaboration for Leadership in Applied Health Research and Care West (NIHR CLAHRC West)<br>Macleod, John; University of Bristol, Population Health Sciences, Bristol Medical School; University of Bristol, The National Institute of Health Research Health Protection Research Unit (NIHR HPRU) in Evaluation of Interventions<br>May, Margaret; University of Bristol, Population Health Sciences, Bristol Medical School; University of Bristol, The National Institute of Health Research Health Protection Research Unit (NIHR HPRU) in Evaluation of Interventions |
| <b>Primary Subject Heading</b>: | General practice / Family practice                                                                                                                                                                                                                                                                                                                                                                                                                                                                                                                                                                                                                                                                                                                                                                                                                                                                                                                                                |
| Secondary Subject Heading:      | HIV/AIDS, Infectious diseases, Public health, Sexual health                                                                                                                                                                                                                                                                                                                                                                                                                                                                                                                                                                                                                                                                                                                                                                                                                                                                                                                       |
| Keywords:                       | PRIMARY CARE, HIV & AIDS < INFECTIOUS DISEASES, HIV testing, CPRD                                                                                                                                                                                                                                                                                                                                                                                                                                                                                                                                                                                                                                                                                                                                                                                                                                                                                                                 |
|                                 |                                                                                                                                                                                                                                                                                                                                                                                                                                                                                                                                                                                                                                                                                                                                                                                                                                                                                                                                                                                   |

SCHOLARONE™  
Manuscripts

1  
2  
3  
4  
5 **Trends in HIV testing in the UK Primary Care setting: A 15 year retrospective cohort study 2000 to**  
6 **2015**  
7

8 M Gompels<sup>1</sup>, S Michael<sup>2</sup>, C F Davies<sup>3</sup>, T Jones<sup>3,4</sup>, John MacLeod<sup>3,5</sup>, M T May<sup>3,5</sup>  
9

10 Version:11/01/2019  
11

12 <sup>1</sup> Dr Mark Gompels: Consultant HIV, Department of Immunology, Southmead Hospital, North Bristol  
13 NHS Trust, UK. Email: [Mark.Gompels@nbt.nhs.uk](mailto:Mark.Gompels@nbt.nhs.uk)  
14

15 <sup>2</sup> Dr Skevi Michael: Senior Teaching Associate, School of Mathematics, University of Bristol, UK.  
16 Email: [Skevi.Michael@bristol.ac.uk](mailto:Skevi.Michael@bristol.ac.uk)  
17

18 <sup>3</sup> Dr Charlotte F Davies: Senior Research Associate, Department of Population Health Sciences,  
19 Bristol Medical School, University of Bristol, UK. Email: [Charlotte.Davies@bristol.ac.uk](mailto:Charlotte.Davies@bristol.ac.uk)  
20

21 <sup>3,4</sup> Dr Timothy Jones: Senior Research Associate, Department of Population Health Sciences, Bristol  
22 Medical School, University of Bristol, UK and The National Institute for Health Research  
23 Collaboration for Leadership in Applied Health Research and Care West (NIHR CLAHRC West) at  
24 University Hospitals Bristol NHS Foundation Trust, Bristol, UK. Email: [Timothy.Jones@bristol.ac.uk](mailto:Timothy.Jones@bristol.ac.uk)  
25

26 <sup>3,5</sup> Professor John Macleod, Professor of Clinical Epidemiology and Primary Care, Department of  
27 Population Health Sciences, Bristol Medical School, University of Bristol, UK and The National  
28 Institute of Health Research Health Protection Research Unit (NIHR HPRU) in Evaluation of  
29 Interventions at University of Bristol, Bristol, UK. Email: [John.Macleod@bristol.ac.uk](mailto:John.Macleod@bristol.ac.uk)  
30

31 <sup>3,5</sup> Professor Margaret T May, Professor of Medical Statistics, Department of Population Health  
32 Sciences, Bristol Medical School, University of Bristol, UK and The National Institute of Health  
33 Research Health Protection Research Unit (NIHR HPRU) in Evaluation of Interventions at University  
34 of Bristol, Bristol, UK. Email: [Margaret.may@bristol.ac.uk](mailto:Margaret.may@bristol.ac.uk)  
35  
36  
37  
38  
39  
40  
41  
42  
43

44 **Corresponding author:**  
45  
46  
47  
48

49 Dr. Charlotte F. Davies  
50 Department of Population Health Sciences  
51 Bristol Medical School  
52 University of Bristol  
53 Bristol  
54 BS8 2PS  
55 UK Telephone: +44 117 9287209  
56

57 Fax: +44 117 928 7325  
58

59 [charlotte.davies@bristol.ac.uk](mailto:charlotte.davies@bristol.ac.uk)  
60

1  
2  
3 Word Count: abstract 300, words 4656, 4 tables, 2 figures, 50 references, 1 supplementary figure, 2  
4 supplementary tables, 1 web supplementary file (appendices 1-4)  
5  
6  
7  
8  
9  
10  
11  
12  
13  
14  
15  
16  
17  
18  
19  
20  
21  
22  
23  
24  
25  
26  
27  
28  
29  
30  
31  
32  
33  
34  
35  
36  
37  
38  
39  
40  
41  
42  
43  
44  
45  
46  
47  
48  
49  
50  
51  
52  
53  
54  
55  
56  
57  
58  
59  
60

For peer review only

**Abstract 300**

**Objectives:** To estimate trends in HIV testing, positivity and prevalence in UK Primary Care for 2000-2015 as part of a wider investigation into reasons for late diagnosis of HIV.

**Design:** Retrospective cohort study using the Clinical Practice Research Datalink (CPRD) which is derived from computerised clinical records produced during consultations in Primary Care.

**Setting:** 404 General Practices in England.

**Participants:** 5,979,598 adults aged  $\geq 16$  years registered between 2000-2015 with 45,093,761 person years of observation.

**Outcomes:** Annual HIV testing rates, proportion of positive tests, and prevalence of HIV-infected people recorded in Primary Care 2000-2015.

**Results:** HIV testing in Primary Care increased from 2000 to 2010, but then declined. Testing was higher in females than males and in those aged 16-44 years compared with older adults. Rates per 100,000 in women aged 16-44 years were 177 (95% CI 167-188); 1309 (1282-1336); 1789 (1757-1821) and 839 (817-862) in 2000, 2005, 2010 and 2015, respectively, and for non-pregnant women: 22.5 (19-26); 134 (125-143); 262 (250-275); 190 (179, 201). For men aged 16-44 years rates were: 26 (22-29); 107 (100-115); 196 (185-206); 137 (127-146). Over the study period, there were approximately 2 positive results per 1000 HIV tests. Men were eight-fold more likely to test positive than women. The percentage of HIV diagnoses among adults recorded in CPRD may be as low as 55% in London and 67% in the rest of the UK.

**Conclusions:** HIV testing rates in Primary Care peaked in 2010 and subsequently declined. Access to testing was higher for women despite the prevalence of HIV being higher in men.

**Implications and further research needed:**

Opportunities remain in Primary Care for increasing HIV testing to prevent costly late diagnoses and decrease HIV transmission. Interventions to improve targeting of tests and increase adherence to HIV testing guidelines are needed in Primary Care.

## Article summary

### Strengths and limitations of this study

- We investigated trends in HIV testing in Primary Care using high quality data from the Clinical Practice Research Datalink (CPRD) which is derived from computerised clinical records produced during consultations in Primary Care in England.
- CPRD provided anonymised Primary Care records on patients registered between 2000 and 2015 in 404 primary care practices in England which is likely to be representative of the general patient population.
- A limitation of the study is that not all General Practices contribute data to CPRD and therefore we cannot know whether the sample was representative.
- A major strength of the study was the large number of patients, nearly 6 million, which allowed us to contrast trends in HIV testing rates in Primary Care by sex, age, deprivation, rural/urban location and whether in London or not.
- Data were available for 15 years of follow up allowing us to show that HIV testing in Primary Care in England increased between 2000 and 2010, but then declined up to 2015 despite several NICE recommendations aimed at promoting testing in this setting.



## Introduction

HIV testing in Primary Care is an important component of the strategy to diagnose HIV earlier and reduce transmission of HIV. In 2015 there were an estimated 89,800 (95% credible interval (CrI) 87,100-94,800) people living with HIV (PLWHIV) in England of whom approximately 15% (CrI 12-19%) were unaware of their infection<sup>1</sup>. Of those individuals newly diagnosed with HIV in 2015, 39% were diagnosed late, defined as having a CD4 count below 350 cells/mL within three months of diagnosis.<sup>2</sup> An estimated 1 in 4 of newly diagnosed individuals experienced a missed opportunity for an earlier diagnosis within the healthcare system in the preceding year.<sup>3</sup> Late diagnosis of HIV is associated with increased hospitalisations, decreased life expectancy,<sup>4-7</sup> and higher treatment and care costs to the NHS.<sup>8</sup> Importantly, individuals with undiagnosed HIV are likely to be responsible for the majority of transmissions because successfully treated individuals are unlikely to infect others.<sup>9</sup>

Universal HIV testing is considered to be cost-effective in areas with a local diagnosed HIV prevalence that exceeds 2 per 1000 in adults aged 15-59 years.<sup>2,10</sup> In these high HIV prevalence areas recommendations are an HIV test should be routinely offered to all new GP registrations, those undergoing tests for other sexually transmitted infections or having blood tests for any reason, and all new hospital medical admissions.<sup>2,11</sup> However, the majority of people with HIV seek medical care for a related condition several times prior to their HIV diagnosis.<sup>12,13</sup> This may be presenting to general practice or hospital care, but without a high degree of clinical suspicion, the diagnosis is often missed.<sup>14</sup> BHIVA has published a list of indicator diseases which are more commonly found in those who are HIV positive than negative.<sup>15</sup> HIV testing is recommended in these cases, but recent surveys suggest poor adherence to guidelines.<sup>16,17</sup>

Expanding HIV testing is a national health priority<sup>18</sup> with 2016 NICE guidelines offering evidence based advice on the practicalities of how to do this in the UK and how to integrate HIV testing into usual clinical care.<sup>11</sup> Regardless of local HIV prevalence, a test should be routinely offered to patients in Primary Care when presenting with any HIV indicator condition and/or if patients are from a high risk group, for example, someone reporting an HIV positive partner or a history of injecting drug use or chemsex.<sup>11</sup> Despite this, evidence from systematic reviews shows that there are often many barriers to testing experienced by patients and equally by the healthcare providers (HCP).<sup>19-21</sup> Patients presenting with clinical indicator conditions to their General Practitioner (GP) provide a valuable opportunity to diagnose HIV and avoid hospitalisations due to late diagnosis.<sup>22</sup> Research has shown that the majority of patients (up to 75%) newly diagnosed with HIV had been seen in the healthcare system within the 12 months prior to their diagnosis resulting in a missed opportunity to

1  
2  
3 test.<sup>12,14,23 24</sup> Opt out HIV testing has been shown to be feasible, acceptable and cost effective in eight  
4 pilot studies conducted in community, primary and secondary care settings in high prevalence areas  
5 across England.<sup>18</sup> However, no recent evidence is available to know if HIV testing in Primary Care has  
6 been increasing and guidelines have been implemented over the country and not just in high risk  
7 areas.<sup>16,17</sup>  
8  
9  
10

11  
12  
13 HIV testing in Primary Care has been reported only for the years 1995 to 2005 using data from the  
14 UK General Practice Research Database (GPRD).<sup>25</sup> This study showed that testing in Primary Care  
15 remained low, but increased steadily. We analysed data from the same source collected between  
16 2000 to 2015 to establish whether HIV testing had increased in Primary Care. We investigated  
17 differences in HIV testing rates and HIV diagnosis by demographic characteristics and estimated the  
18 prevalence of HIV recorded in Primary Care and compared it with estimates from national  
19 surveillance.  
20  
21  
22  
23  
24  
25

## 26 **Methods**

### 27 ***Population and data***

28  
29 We used data from the Clinical Practice Research Datalink (CPRD), previously known as the General  
30 Practice Research Database (GPRD), which is derived from computerised clinical records produced  
31 during consultations in Primary Care. CPRD provided anonymised Primary Care records on patients  
32 registered between 2000 and 2015 in 404 primary care practices in England. Data were available on  
33 nearly 6 million people aged over 16 years old who are broadly representative of the adult UK  
34 population<sup>26</sup>. General Practitioners (GP) enter data on tests, diagnoses and symptoms using Read  
35 codes which are a hierarchical alphanumeric system similar to, but more extensive than  
36 International Classification of Disease (ICD) codes. The list of Read codes used to identify (1) HIV  
37 tests<sup>25</sup> (2) HIV diagnoses<sup>25</sup> (3) pregnancy/delivery/abortion<sup>27</sup> and (4) additional CPRD browser  
38 pregnancy medcodes are listed as appendices 1 to 4, respectively, in the supplementary file. We  
39 used individual level quintiles of the Index of Multiple Deprivation, 2015<sup>28</sup>. Practices were classified  
40 as rural, urban conurbation, or city/town at lower super output level (a small area geographic  
41 boundary of around 1,500 people) in England based on Office for National Statistics classifications,  
42 2011<sup>29</sup>, and as within or outside London. Ethnicity was grouped as Asian, Black African, Black  
43 Caribbean, Other, White, and unknown based on linked Hospital Episode Statistics data.  
44  
45 We used national surveillance data from Public Health England (PHE) on testing in Primary Care  
46 derived from general practices that submit HIV tests to laboratories participating in the Sentinel  
47 Surveillance of Blood Borne Virus Testing (SSBBV). These practices cover 35% of England's Primary  
48  
49  
50  
51  
52  
53  
54  
55  
56  
57  
58  
59  
60

Care population. HIV testing data is captured from 66% of the Primary Care population in extremely high prevalence areas (>5 /1000), 37% within high prevalence areas (>2/1000) and 29% within low prevalence areas. These data exclude any point of care tests (POCTs) carried out by GPs, and tests carried out as part of antenatal screening. The latest data available on testing rates and positivity were for 2015<sup>30</sup>. Data on HIV prevalence were derived from the HIV and AIDS Reporting System (HARS) and for earlier years the Survey of Prevalent HIV Infections Diagnosed (SOPHID) available from PHE.<sup>2</sup> These data were available up to 2015.

### **Patient and Public Involvement**

Public and Patients were not involved in the design of this study. Patient data from General Practices were contributed via CPRD and PHE surveillance as stated above.

### **Statistical methods**

#### *HIV testing rate, positivity and prevalence of HIV recorded in primary care*

Using data from CPRD we estimated the HIV testing rates for each year between 2000-2015, overall and by patient demographics. Testing rates were estimated for males and females, for all ages and grouped by age (16-44,  $\geq 45$  years - chosen to match the study by Evans et al<sup>25</sup>). We also estimated rates separately according to whether the practice was in London or not, and by type of location. For each calendar year, the denominator used to calculate the HIV testing rate was the number of patients who were in the CPRD cohort in that year satisfying the following inclusion criteria:

- (i) they were registered before the 30<sup>th</sup> June of that year
- (ii) they did not transfer to another practice or die before the 30<sup>th</sup> June of that year
- (iii) they were in the same practice for at least six months
- (iv) they had not previously tested positive for HIV.

The numerator was the number of HIV tests carried out within the relevant year. For each patient in the denominator, the number of tests was calculated, disregarding repeat tests that were within a 3 month period. Any test done or registered more than 90 days after the first recorded positive test was ignored.

As the majority of HIV tests in women are carried out as part of antenatal screening, analyses for females were repeated excluding these tests. We identified women who were pregnant using either delivery dates or Read codes as follows:

- (i) Delivery (birth) dates associated with the females in our data: An HIV test was considered antenatal if it occurred between 3-9 months before the recorded delivery date.

- 1  
2  
3 (ii) Read codes indicating any sign of pregnancy (antenatal): In this case an HIV test was considered  
4 antenatal if it occurred within 6 months from the day the Read code was recorded.  
5  
6 (iii) Read codes associated with the postpartum period: In this case the HIV test was considered  
7 antenatal if it occurred within 3-10 months before the corresponding record.  
8  
9 (iv) Read codes indicating any sign of miscarriage or abortion: An HIV test was recorded as ante-natal  
10 if it occurred between 3 months prior to 3 months after the corresponding record.  
11  
12

13 The Read codes associated with pregnancy are listed in the supplementary material. The antenatal  
14 HIV tests were excluded from the numerator and the corresponding patients were removed from the  
15 denominator for the related period as well.  
16  
17

18 We plotted the trends in HIV testing rates per 100,000 person years for 2000-2015 separately for men  
19 and women (including and excluding ante-natal HIV tests) for all adults and restricted to those aged  
20 16-44 years old. In addition, we calculated the annual proportion of HIV tests that were positive for  
21 each year to investigate whether testing improved in terms of targeting higher risk individuals during  
22 the later years.  
23  
24  
25

26 For the years 2005, 2010 and 2015, we estimated and tabulated HIV testing rates and incidence rate  
27 ratios (IRR) with 95% confidence intervals from Poisson models for males and females separately  
28 according to whether practice was in London or not, by age, ethnicity, IMD, and by type of location.  
29 To validate our estimates of HIV testing rates recorded in CPRD, we compared them with those from  
30 national surveillance data collected by PHE for 2015<sup>30</sup>. Finally, we estimated the prevalence of  
31 diagnosed HIV recorded in CPRD and compared this with estimated prevalence from national  
32 surveillance data collected by PHE using SOPHID and HARS to determine the proportion of all HIV  
33 diagnoses that were recorded in CPRD . Data analysis was performed using STATA version 14.  
34  
35  
36  
37  
38  
39  
40  
41

## 42 RESULTS

43 Data were available on 5,979,598 distinct patients with 45,093,761 (males 22,155,768; females  
44 22,937,630) person years of observation. The demographic characteristics of included individuals are  
45 shown in Table 1. There were less males (48%) than females (52%). Practices (15%) and individuals  
46 (16%) in the most deprived quintile of IMD were under-represented in CPRD. The total number of  
47 HIV tests recorded in CPRD between 2000 and 2015 was 159,115 of which 357 (0.2%) were positive.  
48  
49  
50  
51

### 52 *Trends in HIV testing rates 2000-2015 in Primary Care*

53 Figure 1 shows the trend in HIV testing rates per 100,000 person years for the period 2000-2015 by  
54 gender and age group, with and without inclusion of antenatal testing. The main reason for HIV testing  
55 among women of child-bearing age was antenatal screening: the testing rates (per 100,000 person-  
56  
57  
58  
59  
60

1  
2  
3 years) in all women aged 16-44 increased from 177 (95% CI 167-188) in 2000 to 1789 (1757-1821) in  
4  
5 2010 and then decreased to 839 (817, 862) in 2015, with the corresponding figures being 23 (19-26),  
6  
7 262 (250-275) and 190 (179-201) when antenatal testing was excluded. For males the corresponding  
8  
9 rates were 26 (22-29), 196 (185-206) and 137 (127-146) in 2000, 2010 and 2015, respectively. For the  
10  
11 whole period, HIV testing rates were higher in females than males (figure 1). This was true even when  
12  
13 HIV tests carried out as part of antenatal screening were excluded. HIV testing rates in Primary Care  
14  
15 peaked in females in 2010 (figure 1) and have declined markedly since then. In men and women not  
16  
17 tested ante-natally, HIV testing rates increased until 2012-2013, but have declined since. Similar  
18  
19 patterns were seen when data were restricted to those aged 16-44 years only, except that rates were  
20  
21 much higher in younger adults compared with those aged 45 years and over. HIV testing rates with  
22  
23 95% confidence intervals (CI) are listed for all years from 2000-2015 for males, females and females  
24  
25 excluding antenatal tests (supplementary table 1 all adults, supplementary table 2 for those aged 16-  
26  
27 44 years).

#### *Trends in positive HIV diagnosis in Primary Care*

28  
29 Although the number of HIV tests was much higher in women, more men tested positive:  
30  
31 196/20,328 (0.96%) men compared with 161/138,787 (0.12%) women. This was skewed by a very  
32  
33 low rate of positive diagnoses in younger females who were screened ante-natally. The smoothed  
34  
35 trend in the percentage of tests that were positive for men and women of different ages is shown in  
36  
37 figure 2 (plot of raw data is shown in supplementary\_figure). Percentage positive (excluding ante-  
38  
39 natal tests), was similar in men and women before 2005, but declined more sharply in women  
40  
41 thereafter. The percentage of tests that were positive peaked around 2003 and have fallen sharply  
42  
43 since 2010, indicating that there is no evidence of better targeting of testing to individuals in later  
44  
45 years.

#### *HIV testing rates in practices within and outside London, by age and deprivation index*

46  
47 HIV testing rates were two-fold higher in London compared with outside London for both men and  
48  
49 women in 2005 and this differential increased in 2010 and 2015. Table 2 and table 3 give the testing  
50  
51 rates for years 2005, 2010 and 2015 for males and females (excluding antenatal tests), respectively,  
52  
53 stratified by whether the practices were in London or outside London. Data for all years between 2000  
54  
55 and 2015 are given for all adults (supplementary table 1) and for adults aged 16-44 years  
56  
57 (supplementary table 2). In more recent years practices outside London but in conurbations had  
58  
59 higher rates than those in cities or towns, which in turn had higher rates than rural practices. Although  
60  
61 testing rates in men in London practices decreased between 2010 and 2015 overall from 273 (251-

1  
2  
3 295) to 246 (225-266) per 100,000 person-years, there was evidence of a shift in targeting of testing  
4 since rates increased in older men from 151 (127-176) to 180 (154-206) per 100,000 person-years and  
5 in the most deprived quintile from 415 (351-480) to 565 (487-643) per 100,000 person-years. This  
6 targeting effect was also seen among women in London practices, but not in practices outside London.  
7  
8 However, in 2015 in London it remained the case that older people were less likely to be tested:  
9 incidence rate ratio (IRR) for age  $\geq$  45 compared with 16-44 years was 0.59 (0.50-0.71) for men and  
10 0.46 (0.38-0.55) in women. The corresponding IRR for outside London were much lower: IRR for age  $\geq$   
11 45 compared with 16-44 years was 0.37 (0.32-0.43) in men and 0.18 (0.16-0.21) in women. In contrast,  
12 by 2015 the most deprived group were 2- or 3-fold more likely to be tested than the least deprived,  
13 depending on gender and locality, with IRR for IMD quintile 5 versus 1 increasing markedly from 2005  
14 through to 2015 (table 2 (males) and table 3 (females)).  
15  
16  
17  
18  
19  
20  
21  
22

#### 23 *HIV testing rates and positivity according to national surveillance data*

24 For comparison, national surveillance data for 2015 estimated that General Practices in extremely  
25 high prevalence areas defined as greater than 5/1000 population (comparable with "London" in our  
26 CPRD study) carried out the highest number of tests per practice population, 860 per 100 000 person  
27 years. This was nearly double the coverage rate of General Practices in high diagnosed prevalence  
28 areas defined as greater than 2/1000 population (440/100 000), and ten times the coverage rate  
29 among General Practices in low diagnosed prevalence areas (90/100 000). The estimates from  
30 surveillance were higher than our estimates from CPRD (table 2 and table 3). The proportion of  
31 positive tests among those tested in Primary Care estimated from SBBV surveillance data was 0.4%  
32 in 2015<sup>30</sup>. This varied from 0.5% in very high prevalence areas to 0.2% in low prevalence areas and  
33 was consistent with our estimated positivity (figure 2).  
34  
35  
36  
37  
38  
39  
40  
41  
42

#### 43 *Prevalence of recorded HIV in CPRD and comparison with national surveillance estimates*

44 In 2015 the prevalence of diagnosed HIV recorded in CPRD was 2.8 per 1000 adult patients in  
45 London practices and 0.8 per 1000 in the rest of the UK (table 4). According to PHE surveillance, in  
46 2015 HIV prevalence in UK was estimated to be 1.6 per 1000, and excluding undiagnosed HIV was  
47 1.3 per 1000 population.<sup>2</sup> The HIV prevalence in London was estimated to be 4.7 per 1000,  
48 substantially higher than the rest of the UK at 1.1 per 1000. The corresponding observed prevalence,  
49 that is, excluding undiagnosed cases of HIV, was 4.2 and 0.9 per 1000 population in London and the  
50 rest of the UK, respectively.<sup>2</sup> Therefore, only two-thirds of PLWHIV in London were likely known to  
51 General Practice whereas in the rest of the UK this increased to nearly 90%. However, these  
52 percentages are likely to be over-estimated as children aged <16 years were not included in the  
53  
54  
55  
56  
57  
58  
59  
60

1  
2  
3 CPRD calculations of prevalence but were included in PHE data. If we assume that 20% of the UK  
4 population are aged <16 years old and that only 1000 children are living with HIV, then the  
5 prevalence of diagnosed HIV among adults could be as high as 5.1 and 1.2 per 1000 in London and  
6 outside London, respectively. The estimated percentage of HIV diagnoses among adults recorded in  
7 CPRD may be as low as 55% and 67% in London and the rest of the UK, respectively. In General  
8 Practices in London, prevalence of HIV recorded in CPRD was higher for males, older individuals,  
9 Black African ethnicity and most deprived quintile (table 4) with a similar pattern in practices outside  
10 London except that prevalence did not vary by age.  
11  
12  
13  
14  
15  
16  
17  
18

## 19 Discussion

### 20 *Statement of principal findings*

21  
22  
23 Our analysis of CPRD data on GP consultations recorded on approximately 6 million people living in  
24 the UK over a 15-year period, shows that the initial rise in HIV testing seen in Primary Care between  
25 2000 and 2010 reversed with a significant drop in the testing rates for HIV in primary care from  
26 2010. This is an unexpected finding as throughout this period prevalence of HIV has been increasing  
27 which should have engendered higher rates of testing in Primary Care, given the NICE  
28 recommendation to test all new registrants and those with HIV indicator conditions<sup>31,32</sup>. HIV testing  
29 rates in Primary Care were higher in women than men throughout the study period, even when tests  
30 for antenatal screening were excluded, despite HIV prevalence being higher in men. This resulted in  
31 men being eight-fold more likely to test positive than women in this setting. Over the 15-year period  
32 of the study, there were approximately 2 positive results per 1000 HIV tests. We did not find  
33 evidence of better targeting of HIV testing to individuals in more recent years as the percentage of  
34 tests that were positive peaked around 2003. Many individuals at high risk of HIV infection may  
35 choose to test in settings other than General Practice, such as sexual health clinics, which might  
36 make it harder to target HIV testing among the population attending Primary Care.  
37  
38  
39  
40  
41  
42  
43  
44  
45  
46  
47

48 The pattern of HIV testing has also changed over time. Testing was two-fold higher in London than  
49 elsewhere and has increased in the groups and areas of high deprivation within London. This is  
50 reassuring as it also reflects the higher prevalence of HIV in these areas and indicates that HIV  
51 testing has become more geographically targeted. Overall, testing rates were higher in urban  
52 conurbations and cities than in rural areas reflecting the national prevalence figures<sup>2</sup>. Younger  
53 people were more likely to be tested than those aged 45 years and over, which reflects the incidence  
54 pattern for HIV. However, our data shows an increasing trend in the rate of testing among the older  
55  
56  
57  
58  
59  
60

1  
2  
3 age group in London, but not elsewhere, which may have been driven by the recognition that among  
4 those with HIV infection the proportion diagnosed late is higher in older age groups<sup>33</sup>.

5  
6  
7 In 2015, the prevalence of HIV recorded in CPRD was over three-fold higher in London than  
8 elsewhere, but overall was substantially lower than the prevalence of diagnosed HIV estimated from  
9 PHE surveillance<sup>2</sup>. This may be due to HIV-positive individuals not using primary care or to non-  
10 disclosure of their HIV status to their GP, not recording of the diagnosis on GP systems, or to CPRD  
11 not including sufficient practices with high HIV prevalence. CPRD is broadly representative of  
12 Primary Care in the UK, but the UK HIV epidemic is concentrated in cities with approximately half of  
13 HIV-positive individuals living in London<sup>2</sup>. The estimated percentage of HIV diagnoses among adults  
14 that were recorded in CPRD increased between 2005 and 2015 but was still substantially lower in  
15 London than elsewhere. This trend may reflect the ageing HIV population's greater requirement of  
16 primary care services, decrease in stigma of disclosure, or better transfer and recording in Primary  
17 Care of positive results of HIV tests carried out in other settings in later years.

#### 26 *Strengths and weaknesses of the study*

27  
28 This study is very large with data from nearly six million patients followed over fifteen years with  
29 detailed primary care records. This detailed coverage enabled us to accurately measure HIV testing  
30 rates according to the important factors of deprivation, urbanisation, gender, ethnicity and age.  
31 Records were collected prospectively and electronically over a significant time period; therefore, we  
32 were able to show clearly the trends that have occurred. Our analysis and the data collection may be  
33 biased by several factors. The CPRD only includes a sample of general practices, but this is broadly  
34 representative of Primary Care in the UK, and, given the large numbers, this is a sufficient sample  
35 size for estimates of testing rates to be accurate. We have shown the CPRD slightly under  
36 represents deprivation, in both individuals and GP practices. Whilst this may be the case, given the  
37 very large sample size, we think that we can still draw valuable conclusions from this data. This  
38 study can only show the rates of testing in Primary Care. What is clear, given the number of HIV  
39 positive patients, is that many patients will have been diagnosed in other healthcare settings, for  
40 example, PHE estimated that in England during 2016 5.9% and 7.3% of new diagnoses in men and  
41 women, respectively, were made in Primary Care<sup>34</sup>. This implies that estimates of the prevalence of  
42 diagnosed HIV based on diagnoses recorded in CPRD will be under-estimates for the UK which we  
43 have shown by comparing with surveillance data from PHE.

#### 56 *Strengths and weaknesses in relation to other studies, discussing important differences in results*



1  
2  
3 HIV testing in Primary Care in the Netherlands also decreased between 2010-2015 despite similar  
4 guidelines encouraging more pro-active screening for HIV<sup>35</sup>. Although HIV testing in Primary Care has  
5 declined, the rates of late diagnosis (CD4 count less than 350 cells/mL) have also declined from 50%  
6 in 2010 to 39% in 2015<sup>36</sup>, indicating a discordancy between the testing in Primary Care and  
7 diagnosis. This indicates that increased testing has likely occurred in other settings. Earlier diagnosis  
8 may be due to better detection in secondary care, either from screening or testing those with  
9 indicator conditions, or through other routes such as sexual health clinics, insurance requests or  
10 specialist testing services. Moreover, if testing has become better targeted in Primary Care and  
11 incidence in the consulting population is decreasing then even without an increase in testing, those  
12 who get tested may be tested earlier in the course of HIV infection leading to reduced rates of late  
13 diagnoses. However, we have shown a significant decline in HIV testing in Primary Care since the  
14 previous analysis by Evans *et al*<sup>25</sup> on testing up to 2005, and therefore we can look at increased  
15 testing in primary care as an option to improve early HIV detection rates.  
16  
17  
18  
19  
20  
21  
22  
23  
24

25  
26 *Meaning of the study: possible explanations and implications for clinicians and policymakers*

27  
28 Since 2015, UK and international treatment guidelines<sup>37</sup> for those diagnosed with HIV recommend  
29 immediate treatment with antiretroviral therapy (ART) because of both the START trial<sup>38</sup> showing  
30 that delaying therapy was detrimental to individual health and the beneficial effects of treatment as  
31 prevention (TasP). Therefore, in recent years the majority of new infections will have been  
32 transmitted by those who were undiagnosed<sup>39</sup> because most patients who are diagnosed are treated  
33 with effective ART and unlikely to transmit HIV.<sup>9,40,41</sup> This change, together with pre-exposure  
34 prophylaxis (PrEP), has resulted in a decline in HIV infection rates for the last 2 years<sup>34</sup>. Nevertheless,  
35 there are still opportunities for diagnosing HIV earlier in Primary Care whilst testing rates remain  
36 very low. Current UK testing guidelines<sup>34</sup> recommend people attending General Practices in areas of  
37 high HIV prevalence should be offered an HIV test at registration or when having a blood test if they  
38 have not had an HIV test in the past 12 months. People newly diagnosed with an HIV indicator  
39 condition should also be offered an HIV test. The aim is to diagnose HIV earlier as late diagnosis of  
40 HIV is associated with increased morbidity and mortality.<sup>7,42,43</sup> There are benefits for diagnosing HIV  
41 earlier both for the individual in terms of quality of life and life expectancy<sup>6</sup> and a wider societal  
42 benefit of reduced transmission and lower NHS treatment costs. Each prevented infection saves an  
43 estimated £300,000 in lifetime treatment costs.<sup>43,44</sup> According to PHE surveillance, in 2016, HIV test  
44 positivity rates in Primary Care in high (0.5%) and extremely high (0.4%) diagnosed HIV prevalence  
45 areas exceeded those seen in sexual health services, indicating that more testing should be carried  
46 out in primary care<sup>34</sup>.  
47  
48  
49  
50  
51  
52  
53  
54  
55  
56  
57  
58  
59  
60

### *Unanswered questions and future research*

Although it is a public health imperative, and target, to increase HIV testing and diagnosis, it is unclear how this could be implemented in Primary Care. A literature review undertaken of public and Health Care Professional (HCP) attitudes towards HIV testing in the UK showed that a proactive offer of an HIV test by the HCP was an important factor which could help increase testing rates.<sup>21</sup> Reasons for low levels of HIV testing by the HCP include fear/concern of offending patients, inadequate knowledge/training on HIV, low awareness of current testing guidelines, underestimation of patient risk, insufficient time, competing priorities, perceived burdensome consent process and pre-test discussion.<sup>19-21,45</sup> Studies indicate a need for education and training on HIV testing for HCP in Primary Care to overcome these barriers to testing.<sup>16,46</sup> Adequate interventions are needed to address these barriers so individuals can receive a timely HIV test and with it the important treatment benefits and care if found to be HIV positive. HCPs in the UK have opportunities to initiate HIV testing in at-risk individuals and reduce the proportion of undiagnosed infection.<sup>12,14</sup> Another literature review has provided evidence that HIV indicator conditions have the potential to be used more effectively as triggers for earlier HIV testing<sup>47</sup>. Opt-out testing can facilitate increased HIV testing as has been evident from a trial in emergency care setting<sup>48</sup>. When blood tests are carried out for any reason in primary care, there could also be an opt-out HIV test. Computer prompts based on risk algorithms are another strategy to support HIV testing<sup>49-53</sup> which could be based on electronic health records such as those in CPRD.

Although the results shown here are for a UK based population the methodology may be applicable to other healthcare systems. They provide accurate testing rates and detection rates in Primary Care which are measures of HIV testing that can be used for international comparisons. A key element for preventing transmission and late diagnosis of HIV is testing in Primary Care, based on a screening strategy or indicator conditions<sup>54</sup>. These data inform us of the current situation on testing and will be useful in planning and evaluating interventions to improve this.

The data on the discrepancy between PHE and CPRD prevalence of HIV positive status being recorded is another finding of importance for planning. New testing strategies such as home test and rapid testing outside of standard health care settings may contribute to the decrease in testing in Primary Care. These need to have a strategy in their delivery to feed back to Primary Care to maximise the benefits to patients and their health networks.

## Conclusions

HIV testing rates have declined in Primary Care in all age groups, although there has been a fall in late presentation. HIV testing rates are highest in London, and higher in urban areas than rural areas. Adherence to HIV testing guidelines<sup>15,31,32</sup> would likely increase the number of positive tests and help prevent late diagnosis. Further interventions to increase selectivity of testing (positive cases per test) may be required, either at the individual level using risk factors and HIV indicator conditions or at the practice level using knowledge of local HIV prevalence.

## Contributor and guarantor information

MG and MM planned the research study and were responsible for study design. JM and TJ advised on study design. CD applied for ethics approval and did the literature search. TJ and CD obtained data from CPRD and helped with coding and extracting data. SM was responsible for statistical analyses, tables and graphs. MM, SM and MG wrote the first draft of the paper. All authors contributed to writing and revising the paper and agreed to submission. MM acts as guarantor for the conduct of the study, had full access to the data and made decision to publish.

## Ethics approval

The protocol was submitted to and approved by the independent scientific advisory committee for the CPRD (protocol ISAC number 16\_172A). The study was approved by the South West, Frenchay, Research Ethics Committee on the 19/09/2016 (REC reference 16/SW/0286).

## Transparency statement

Margaret May affirms that the manuscript is an honest, accurate and transparent account of the study, and that no important aspects of the study have been omitted. The sponsor had no role in research or decision to publish.

## Competing Interests statement

No authors have any competing interests.

## Role of the funding source:

The study was supported by Research Capability Funding from North Bristol NHS Trust. This study is based in part on data from the Clinical Practice Research Datalink (CPRD) obtained under licence from the UK Medicines and Healthcare products Regulatory Agency. This report is independent research supported by the National Institute for Health Research (NIHR) Health Protection Research Unit (HPRU) in Evaluation of Interventions at University of Bristol in partnership with Public Health England. TJ's time is supported by the NIHR Collaboration for Leadership in Applied Health Research and Care West (CLAHRC West) at University Hospitals Bristol NHS Foundation Trust. MM is also supported by the NIHR Biomedical Research Centre at University Hospitals Bristol NHS Foundation Trust and the University of Bristol. However, the interpretation and conclusions contained in this report are those of the authors and not necessarily those of the NHS, the NIHR, CPRD or the Department of Health.

## Acknowledgements

We would like to thank the following authors; Joni Jackson, Natalia V. Lewis, Gene S Feder, Penny Whiting, Timothy Jones, John Macleod and Maria Theresa Redaniel for sharing their medical codes to identify pregnancy, delivery and abortion used in our data analysis.

## Data sharing

No additional data is available as use of the data was licensed by CPRD and therefore cannot be shared further.

## References

1. Brown AE, Kirwan PD, Chau C, Khawam J, Gill ON, VC. D. Public Health England, London. Towards elimination of HIV transmission, AIDS and HIV-related deaths in the UK – 2017 report. 2017.
2. Kirwan PC, C; Brown, AE; Delpech, VC; and contributors;. *HIV in the UK - 2016 report*. London: Public Health England;2016.
3. Ellis S, Curtis H, Ong ELC, British HIVAB, Stand BCA. HIV diagnoses and missed opportunities. Results of the British HIV Association (BHIVA) National Audit 2010. *Clinical Medicine*. 2012;12(5):430-434.
4. Chadborn TR, Delpech VC, Sabin CA, Sinka K, Evans BG. The late diagnosis and consequent short-term mortality of HIV-infected heterosexuals (England and Wales, 2000-2004). *AIDS*. 2006;20(18):2371-2379.
5. Girardi E, Sabin CA, Monforte AdA. Late diagnosis of HIV infection: Epidemiological features, consequences and strategies to encourage earlier testing. *Jaids-Journal of Acquired Immune Deficiency Syndromes*. 2007;46:S3-S8.
6. May M, Gompels M, Delpech V, et al. Impact of late diagnosis and treatment on life expectancy in people with HIV-1: UK Collaborative HIV Cohort (UK CHIC) Study. *British Medical Journal*. 2011;343(d6016).
7. Croxford S, Kitching A, Desai S, et al. Mortality and causes of death in people diagnosed with HIV in the era of highly active antiretroviral therapy compared with the general population: an analysis of a national observational cohort. *The Lancet Public Health*. 2017;2(1):e35-e46.
8. Beck EJ, Mandalia S, Sangha R, et al. The Cost-Effectiveness of Early Access to HIV Services and Starting cART in the UK 1996-2008. *PLoS One*. 2011;6(12).
9. Rodger AJ, Cambiano V, Bruun T, et al. Sexual Activity Without Condoms and Risk of HIV Transmission in Serodifferent Couples When the HIV-Positive Partner Is Using Suppressive Antiretroviral Therapy. *Jama-J Am Med Assoc*. 2016;316(2):171-181.
10. NICE. National Institute of Health and Care Excellence (NICE). HIV testing: increasing uptake among people who may have undiagnosed HIV. Economic assessment: resource impact of recommendations. March 2016 (accessed 07/2016) <https://www.nice.org.uk/guidance/GID-PHG91/documents/economic-report>. 2016.
11. NICE. National Institute of Health and Care Excellence (NICE). HIV testing: increasing uptake among people who may have undiagnosed HIV. (accessed 09/2017) [niceorguk/guidance/ng60](https://www.nice.org.uk/guidance/ng60). 2016.
12. Read P, Armstrong-James D, Tong CYW, Fox J. Missed opportunities for HIV testing-a costly oversight. *Qjm-an International Journal of Medicine*. 2011;104(5):421-424.
13. Joore IK, Arts DL, Kruijer MJ, et al. HIV indicator condition-guided testing to reduce the number of undiagnosed patients and prevent late presentation in a high-prevalence area: a case-control study in primary care. *Sex Transm Infect*. 2015;91(7):467-472.
14. Burns FM, Johnson AM, Nazroo J, et al. Missed opportunities for earlier HIV diagnosis within primary and secondary healthcare settings in the UK. *AIDS*. 2008;22(1):115-122.

- 1
  - 2
  - 3
  - 4
  - 5
  - 6
  - 7
  - 8
  - 9
  - 10
  - 11
  - 12
  - 13
  - 14
  - 15
  - 16
  - 17
  - 18
  - 19
  - 20
  - 21
  - 22
  - 23
  - 24
  - 25
  - 26
  - 27
  - 28
  - 29
  - 30
  - 31
  - 32
  - 33
  - 34
  - 35
  - 36
  - 37
  - 38
  - 39
  - 40
  - 41
  - 42
  - 43
  - 44
  - 45
  - 46
  - 47
  - 48
  - 49
  - 50
  - 51
  - 52
  - 53
  - 54
  - 55
  - 56
  - 57
  - 58
  - 59
  - 60
15. BHIVA. British HIV Association. UK National Guidelines for HIV testing 2008; (accessed 04/2016) <http://www.bhiva.org/HIVtesting2008.aspx>. 2008.
16. Elmahdi R, Gerver SM, Guillen GG, Fidler S, Cooke G, Ward H. Low levels of HIV test coverage in clinical settings in the UK: a systematic review of adherence to 2008 guidelines. *Sex Transm Infect*. 2014;90(2):119-124.
17. Hartney T, Kennedy I, Crook P, Nardone A. Expanded HIV testing in high-prevalence areas in England: results of a 2012 audit of sexual health commissioners. *HIV medicine*. 2014;15(4):251-254.
18. Health Protection Agency (HPA). Time to test for HIV: expanding HIV testing in healthcare and community services in England (accessed 09/2017). 2011.
19. Deblonde J, De Koker P, Hamers FF, Fontaine J, Luchters S, Temmerman M. Barriers to HIV testing in Europe: a systematic review. *European Journal of Public Health*. 2010;20(4):422-432.
20. Bolsewicz K, Vallely A, Debattista J, Whittaker A, Fitzgerald L. Factors impacting HIV testing: a review - perspectives from Australia, Canada, and the UK. *Aids Care-Psychological and Socio-Medical Aspects of Aids/Hiv*. 2015;27(5):570-580.
21. Davies C, Gompels M, May M. Public and Healthcare Practitioner attitudes towards HIV testing: Review of the evidence in the UK. *International STD Research and Reviews*. 2015;3(3):991-1022.
22. Scognamiglio P, Chiaradia G, De Carli G, et al. The potential impact of routine testing of individuals with HIV indicator diseases in order to prevent late HIV diagnosis. *Bmc Infect Dis*. 2013;13.
23. Goodall L, Leen C. Late diagnosis of HIV: could this be avoided? *Scott Med J*. 2011;56(2):84-86.
24. Joore IK, Reukers DF, Donker GA, et al. Missed opportunities to offer HIV tests to high-risk groups during general practitioners' STI-related consultations: an observational study. *BMJ Open*. 2016;6(1):e009194.
25. Evans HER, Mercer CH, Rait G, et al. Trends in HIV testing and recording of HIV status in the UK primary care setting: a retrospective cohort study 1995-2005. *Sex Transm Infect*. 2009;85(7):520-526.
26. Herrett E, Gallagher AM, Bhaskaran K, et al. Data Resource Profile: Clinical Practice Research Datalink (CPRD). *Int J Epidemiol*. 2015;44(3):827-836.
27. Jackson J, Lewis NV, Feder GS, et al. Exposure to domestic violence and abuse and consultations for emergency contraception: nested case-control study in a UK primary care dataset. *Br J Gen Pract* DOI: <https://doi.org/10.3399/bjgp18X700277>. 2018.
28. National Statistics. English Indices of Deprivation 2015. Statistics on relative deprivation in small areas in England. <https://www.gov.uk/government/statistics/english-indices-of-deprivation-2015> (accessed 04/2016). 2015.
29. Office for National statistics (ONS), Rural/Urban classifications. <https://www.ons.gov.uk/methodology/geography/geographicalproducts/ruralurbanclassifications/2011ruralurbanclassification> (accessed 07/2016)
- 2011.
30. Public Health England (PHE). Health Protection Report. Annual report from the sentinel surveillance study of blood borne virus testing in England: data for January to December 2015
- (Accessed July 2016)
- [https://assets.publishing.service.gov.uk/government/uploads/system/uploads/attachment\\_data/file/540332/hpr2416\\_bbvs.pdf](https://assets.publishing.service.gov.uk/government/uploads/system/uploads/attachment_data/file/540332/hpr2416_bbvs.pdf). 2016.
31. NICE. National Institute for Health and Care Excellence (NICE). Increasing the uptake of HIV testing to reduce undiagnosed infection and prevent transmission among black African

- 1  
2  
3 communities living in England. *NICE Public Health Guidance 33 (accessed 10/2014)*  
4 <http://nice.org.uk>. 2011.
- 5 32. NICE. National Institute for Health and Care Excellence (NICE). Increasing the uptake of HIV  
6 testing among men who have sex with men. *NICE Public Health Guidance 34 (accessed*  
7 *09/2014)* <http://nice.org.uk>. 2011.
- 8 33. Tavoschi L, Gomes Dias J, Pharris A. New HIV diagnoses among adults aged 50 years or older  
9 in 31 European countries, 2004-15: an analysis of surveillance data. *Lancet HIV*.  
10 2017;4(11):e514-e521.
- 11 34. Nash SGF, M; Gill, O.N.; Connor, N.; and contributors;. *HIV testing in England: 2017 report*. .  
12 London: Public Health England; 1/11/2017 2017.
- 13 35. Joore IK, van Bergen J, Ter Riet G, van der Maat A, van Dijk N. Development and evaluation  
14 of a blended educational programme for general practitioners' trainers to stimulate  
15 proactive HIV testing. *BMC family practice*. 2018;19(1):36.
- 16 36. Public Health England (PHE). HIV: annual data tables. HIV surveillance data in the UK by  
17 demographic characteristics and geographical region. (Accessed 7/2016)  
18 <https://www.gov.uk/government/statistics/hiv-annual-data-tables>. 2015 (updated 2017).
- 19 37. World Health Organisation (WHO). Guideline on when to start antiretroviral therapy and on  
20 pre-exposure prophylaxis for HIV. Geneva: World Health Organization, 2015  
21 (<http://www.who.int/hiv/pub/guidelines/earlyrelease-arv/en> (accessed 07/17). Sept 2015.
- 22 38. Lundgren JD, Babiker AG, Gordin F, et al. Initiation of Antiretroviral Therapy in Early  
23 Asymptomatic HIV Infection. *The New England journal of medicine*. 2015;373(9):795-807.
- 24 39. Marks G, Crepaz N, Janssen RS. Estimating sexual transmission of HIV from persons aware  
25 and unaware that they are infected with the virus in the USA. *Aids*. 2006;20(10):1447-1450.
- 26 40. Vernazza P, Hirschel B, Bernasconi E, Flepp M. HIV transmission under highly active  
27 antiretroviral therapy. *Lancet*. 2008;372(9652):1806-1807.
- 28 41. Cohen MS, Chen YQ, McCauley M, et al. Prevention of HIV-1 Infection with Early  
29 Antiretroviral Therapy. *New Engl J Med*. 2011;365(6):493-505.
- 30 42. Sabin C. Review of life expectancy in people with HIV in settings with optimal ART access:  
31 what we know and what we don't. *J Int AIDS Soc*. 2012;15:4-4.
- 32 43. Nakagawa F, Lodwick RK, Smith CJ, et al. Projected life expectancy of people with HIV  
33 according to timing of diagnosis. *Aids*. 2012;26(3):335-343.
- 34 44. Fleishman JA, Yehia BR, Moore RD, Gebo KA, Network HR. The Economic Burden of Late  
35 Entry Into Medical Care for Patients With HIV Infection. *Med Care*. 2010;48(12):1071-1079.
- 36 45. Hunter E, Perry M, Leen C, Premchand N. HIV testing: getting the message across-a survey  
37 of knowledge, attitudes and practice among non-HIV specialist physicians. *Postgraduate*  
38 *Medical Journal*. 2012;88(1036):59-65.
- 39 46. Pillay TD, Mullineux J, Smith CJ, Matthews P. Unlocking the potential: longitudinal audit finds  
40 multifaceted education for general practice increases HIV testing and diagnosis. *Sex Transm*  
41 *Infect*. 2013;89(3):191-U125.
- 42 47. Davies C, Gompels M, May M. Use and Effectiveness of HIV Indicator Conditions in Guiding  
43 HIV Testing: A Review of the Evidence  
44  
45  
46  
47  
48  
49 *International STD Research & Reviews*. 2017;6(2):1-27.
- 50 48. Montoy JC, Dow WH, Kaplan BC. Patient choice in opt-in, active choice, and opt-out HIV  
51 screening: randomized clinical trial. *BMJ (Clinical research ed)*. 2016;532:h6895.
- 52 49. Federman D, Kravetz J, Vasquez L, ., Campbell S. Improving human immunodeficiency virus  
53 testing rates with an electronic clinical reminder. *The American Journal of Medicine*.  
54 2012;125(3):240-242.
- 55 50. Schrantz SJ, Babcock CA, Theodosis C, Brown S, Mercer S, Pillow MT ea. A targeted,  
56 conventional assay, emergency department HIV testing program integrated with existing  
57 clinical procedures. . *Ann Emerg Med*. 2011;58((1 Suppl 1)::S85-88.e81.
- 58  
59  
60

- 1  
2  
3  
4  
5  
6  
7  
8  
9  
10  
11  
12  
13  
14  
15  
16  
17  
18  
19  
20  
21  
22  
23  
24  
25  
26  
27  
28  
29  
30  
31  
32  
33  
34  
35  
36  
37  
38  
39  
40  
41  
42  
43  
44  
45  
46  
47  
48  
49  
50  
51  
52  
53  
54  
55  
56  
57  
58  
59  
60
51. Goetz MB, Hoang T, Bowman C, Knapp H, Rossman B, Smith R. A system-wide intervention to improve HIV testing in the Veterans Health Administration. . *J Gen Intern Med.* 2008;23(8):1200-1207.
52. Menza TW HJ, Celum CL, Golden, MR. Prediction of HIV acquisition among men who have sex with men. . *Sex Transm Dis.* 2009;36(9):547-555.
53. Sharghi N, Bosch RJ, Mayer K, Essex M, Seage GR. The development and utility of a clinical algorithm to predict early HIV-1 infection. . *J Acquir Immune Defic Syndr.* 2005;40(4):472-478.
54. Joore IK, Twisk DE, Vanrolleghem AM, et al. The need to scale up HIV indicator condition-guided testing for early case-finding: a case-control study in primary care. *BMC family practice.* 2016;17(1):161.

Table 1: Patient and practice demographics

| Demographic Variable                                                 | Group              | Frequency | Percentage (%) |
|----------------------------------------------------------------------|--------------------|-----------|----------------|
| <b>Gender</b>                                                        | Males              | 2,871,884 | 48.03          |
|                                                                      | Females            | 3,107,562 | 51.97          |
|                                                                      | Other/Unknown      | 152       | 0.00           |
| <b>Age (in 2015)</b>                                                 | 16-44              | 2,684,443 | 44.89          |
|                                                                      | >44                | 3,295,155 | 55.11          |
| <b>Ethnicity</b>                                                     | Asian              | 147,295   | 2.46           |
|                                                                      | Black African      | 45,632    | 0.76           |
|                                                                      | Black Caribbean    | 28,558    | 0.48           |
|                                                                      | Other              | 118,934   | 1.99           |
|                                                                      | White              | 3,328,189 | 55.66          |
|                                                                      | Unknown            | 2,310,990 | 38.65          |
| <b>Region</b>                                                        | Outside London     | 4,693,116 | 78.49          |
|                                                                      | London             | 1,129,924 | 18.90          |
|                                                                      | Unknown            | 156,558   | 2.62           |
| <b>Urban/Rural</b>                                                   | Urban(Conurbation) | 2,134,497 | 35.70          |
|                                                                      | Urban(City/Town)   | 2,991,079 | 50.02          |
|                                                                      | Rural              | 697,452   | 11.66          |
|                                                                      | Unknown            | 156,558   | 2.62           |
| <b>Patient IMD (2015)</b><br>1=least deprived, ..., 5=most deprived  | Quintile 1         | 1,285,213 | 21.49          |
|                                                                      | Quintiles 2,3,4    | 3,564,936 | 59.62          |
|                                                                      | Quintile 5         | 964,853   | 16.14          |
|                                                                      | Unknown            | 164,596   | 2.75           |
| <b>Practice IMD (2015)</b><br>1=least deprived, ..., 5=most deprived | Quintile 1         | 1,249,293 | 20.89          |
|                                                                      | Quintiles 2,3,4    | 3,702,313 | 61.92          |
|                                                                      | Quintile 5         | 871,434   | 14.57          |
|                                                                      | Unknown            | 156,558   | 2.62           |

Table 2: Testing rates (per 100,000 person years) for **males** and incidence rate ratios (IRR) with 95% CI for years 2005, 2010, 2015.

| London                     |                |                    |         |                  |                     |         |                 |                    |         |
|----------------------------|----------------|--------------------|---------|------------------|---------------------|---------|-----------------|--------------------|---------|
|                            | 2005           |                    |         | 2010             |                     |         | 2015            |                    |         |
|                            | Rate (95% CI)  | IRR (95% CI)       | p-value | Rate (95% CI)    | IRR (95% CI)        | p-value | Rate (95% CI)   | IRR (95% CI)       | p-value |
| <b>Overall</b>             | 133 (117, 148) | -                  | -       | 273 (251, 295)   | -                   | -       | 246 (225, 266)  | -                  | -       |
| <b>Age</b>                 |                |                    |         |                  |                     |         |                 |                    |         |
| 16-44                      | 175 (151, 198) | 1                  | <0.0001 | 366 (333, 400)   | 1                   | <0.0001 | 304 (272, 336)  | 1                  | <0.0001 |
| >=45                       | 75 (56, 93)    | 0.43 (0.33, 0.56)  |         | 151 (127, 176)   | 0.41 (0.34, 0.50)   |         | 180 (154, 206)  | 0.59 (0.50, 0.71)  |         |
| <b>Ethnicity</b>           |                |                    |         |                  |                     |         |                 |                    |         |
| White                      | 102 (80, 125)  | 1                  |         | 240 (206, 275)   | 1                   |         | 222 (187, 256)  | 1                  |         |
| Asian                      | 152 (73, 232)  | 1.49 (0.85, 2.62)  | <0.0001 | 329 (220, 438)   | 1.37 (0.95, 1.96)   | <0.0001 | 167 (88, 247)   | 0.76 (0.47, 1.22)  | <0.0001 |
| Black African              | 669 (361, 977) | 6.53 (3.93, 10.85) |         | 1227 (849, 1605) | 5.10 (3.63, 7.18)   |         | 919 (602, 1236) | 4.15 (2.84, 6.06)  |         |
| Black Caribbean            | 216 (432, 389) | 2.11 (0.92, 4.82)  |         | 361 (148, 574)   | 1.50 (0.82, 2.76)   |         | 523 (267, 779)  | 2.36 (1.42, 3.95)  |         |
| <b>Patient IMD (2015)*</b> |                |                    |         |                  |                     |         |                 |                    |         |
| Quintile 1                 | 160 (119, 202) | 1                  |         | 207 (159, 254)   | 1                   |         | 200 (153, 248)  | 1                  |         |
| Quintiles 2,3,4            | 120 (102, 139) | 0.75 (0.56, 1.01)  | 0.0912  | 252 (226, 279)   | 1.22 (0.95, 1.57)   | <0.0001 | 177 (155, 198)  | 0.88 (0.68, 1.14)  | <0.0001 |
| Quintile 5                 | 155 (114, 195) | 0.96 (0.67, 1.40)  |         | 415 (351, 480)   | 2.01 (1.53, 2.65)   |         | 565 (487, 643)  | 2.82 (2.16, 3.68)  |         |
| Outside London             |                |                    |         |                  |                     |         |                 |                    |         |
|                            | 2005           |                    |         | 2010             |                     |         | 2015            |                    |         |
|                            | Rate (95% CI)  | IRR (95% C.I.)     | p-value | Rate (95% CI)    | IRR (95% C.I.)      | p-value | Rate (95% CI)   | IRR (95% C.I.)     | p-value |
| <b>Overall</b>             | 65 (60, 70)    | -                  | -       | 106 (100, 112)   | -                   | -       | 65 (60, 69)     | -                  | -       |
| <b>Age</b>                 |                |                    |         |                  |                     |         |                 |                    |         |
| 16-44                      | 95 (87, 103)   | 1                  | <0.0001 | 161 (150, 172)   | 1                   | <0.0001 | 100 (91, 109)   | 1                  | <0.0001 |
| >=45                       | 34 (29, 39)    | 0.36 (0.30, 0.42)  |         | 54 (48, 60)      | 0.34 (0.30, 0.38)   |         | 37 (32, 42)     | 0.37 (0.32, 0.43)  |         |
| <b>Ethnicity</b>           |                |                    |         |                  |                     |         |                 |                    |         |
| White                      | 63 (57, 69)    | 1                  |         | 100 (92, 108)    | 1                   |         | 63 (57, 70)     | 1                  |         |
| Asian                      | 159 (89, 229)  | 2.52 (1.61, 3.94)  | <0.0001 | 336 (245, 427)   | 3.36 (2.55, 4.44)   |         | 200 (135, 266)  | 3.16 (2.25, 4.45)  |         |
| Black African              | 579 (221, 937) | 9.17 (4.90, 17.16) |         | 1321 (859, 1783) | 13.24 (9.23, 18.97) |         | 584 (289, 878)  | 9.22 (5.51, 15.44) |         |
| Black Caribbean            | 185 (37, 366)  | 2.93 (1.09, 7.83)  |         | 506 (156, 856)   | 5.06 (2.86, 8.96)   |         | 202 (25, 379)   | 3.19 (1.32, 7.70)  |         |
| <b>Patient IMD (2015)*</b> |                |                    |         |                  |                     |         |                 |                    |         |
| Quintile 1                 | 60 (51, 69)    | 1                  |         | 98 (87, 110)     | 1                   |         | 61 (52, 70)     | 1                  |         |
| Quintiles 2,3,4            | 60 (54, 66)    | 1.0 (0.84, 1.20)   | 0.0002  | 94 (87, 101)     | 0.96 (0.83, 1.10)   | <0.0001 | 53 (48, 59)     | 0.87 (0.73, 1.04)  | <0.0001 |
| Quintile 5                 | 89 (75, 104)   | 1.49 (1.20, 1.86)  |         | 163 (145, 182)   | 1.66 (1.41, 1.96)   |         | 115 (99, 131)   | 1.89 (1.55, 2.31)  |         |
| <b>Urban/Rural class</b>   |                |                    |         |                  |                     |         |                 |                    |         |
| Conurbation                | 65 (55, 76)    | 1                  |         | 144 (129, 159)   | 1                   |         | 91 (79, 102)    | 1                  |         |
| City/Town                  | 69 (63, 75)    | 1.05 (0.88, 1.26)  | 0.0045  | 100 (93, 107)    | 0.70 (0.61, 0.79)   | <0.0001 | 60 (54, 65)     | 0.66 (0.56, 0.77)  | <0.0001 |
| Rural                      | 47 (37, 58)    | 0.72 (0.55, 0.95)  |         | 75 (62, 88)      | 0.52 (0.43, 0.64)   |         | 49 (39, 60)     | 0.55 (0.43, 0.70)  |         |

\*1=least deprived - 5=most deprived



Table 3: Testing rates (per 100000 person years) for **females** and incidence rate ratios (IRR) with 95% CI for years 2005, 2010, 2015 (antenatal testing excluded)

| London                     |                |                    |         |                 |                   |         |                |                    |         |
|----------------------------|----------------|--------------------|---------|-----------------|-------------------|---------|----------------|--------------------|---------|
|                            | 2005           | 2005               |         | 2010            | 2010              |         | 2015           | 2015               |         |
|                            | Rate (95% CI)  | IRR (95% CI)       | p-value | Rate (95% CI)   | IRR (95% CI)      | p-value | Rate (95% CI)  | IRR (95% CI)       | p-value |
| <b>Overall</b>             | 139 (123, 155) | -                  | -       | 309 (285, 332)  | -                 | -       | 243 (223, 264) | -                  | -       |
| <b>Age</b>                 |                |                    |         |                 |                   |         |                |                    |         |
| 16-44                      | 216 (189, 242) | 1                  |         | 479 (440, 517)  | 1                 |         | 327 (295, 360) | 1                  |         |
| >=45                       | 39 (26, 52)    | 0.18 (0.13, 0.26)  | <0.0001 | 93 (74, 112)    | 0.19 (0.16, 0.24) | <0.0001 | 150 (127, 173) | 0.46 (0.38, 0.55)  | <0.0001 |
| <b>Ethnicity</b>           |                |                    |         |                 |                   |         |                |                    |         |
| White                      | 120 (100, 140) | 1                  |         | 270 (239, 301)  | 1                 |         | 170 (144, 195) | 1                  |         |
| Asian                      | 199 (117, 280) | 1.65 (1.09, 2.51)  |         | 261 (183, 339)  | 0.97 (0.70, 1.33) |         | 190 (126, 254) | 1.12 (0.78, 1.62)  |         |
| Black African              | 415 (234, 596) | 3.46 (2.21, 5.43)  | <0.0001 | 825 (602, 1048) | 3.06 (2.29, 4.08) | <0.0001 | 728 (527, 929) | 4.30 (3.13, 5.87)  | <0.0001 |
| Black Caribbean            | 248 (96, 400)  | 2.06 (1.15, 3.72)  |         | 438 (260, 617)  | 1.63 (1.06, 2.48) |         | 399 (221, 578) | 2.35 (1.50, 3.70)  |         |
| <b>Patient IMD (2015)*</b> |                |                    |         |                 |                   |         |                |                    |         |
| Quintile 1                 | 153 (112, 194) | 1                  |         | 172 (130, 215)  | 1                 |         | 156 (115, 197) | 1                  |         |
| Quintiles 2,3,4            | 125 (106, 143) | 0.82 (0.60, 1.10)  | 0.0278  | 284 (258, 311)  | 1.65 (1.27, 2.14) | <0.0001 | 195 (173, 218) | 1.25 (0.95, 1.66)  | <0.0001 |
| Quintile 5                 | 183 (138, 227) | 1.19 (0.84, 1.71)  |         | 539 (463, 615)  | 3.13 (2.37, 4.14) |         | 520 (448, 592) | 3.33 (2.50, 4.46)  |         |
| Outside London             |                |                    |         |                 |                   |         |                |                    |         |
|                            | 2005           | 2005               |         | 2010            | 2010              |         | 2015           | 2015               |         |
|                            | Rate (95% CI)  | IRR (95% CI)       | p-value | Rate (95% CI)   | IRR (95% CI)      | p-value | Rate (95% CI)  | IRR (95% CI)       | p-value |
| <b>Overall</b>             | 67 (62, 71)    | -                  | -       | 117 (111, 123)  | -                 | -       | 83 (78, 89)    | -                  | -       |
| <b>Age</b>                 |                |                    |         |                 |                   |         |                |                    |         |
| 16-44                      | 118 (108, 127) | 1                  |         | 216 (204, 229)  | 1                 |         | 160 (148, 171) | 1                  |         |
| >=45                       | 21 (17, 24)    | 0.18 (0.15, 0.21)  | <0.0001 | 34 (29, 38)     | 0.16 (0.14, 0.18) | <0.0001 | 29 (25, 33)    | 0.18 (0.16, 0.21)  | <0.0001 |
| <b>Ethnicity</b>           |                |                    |         |                 |                   |         |                |                    |         |
| White                      | 67 (61, 72)    | 1                  |         | 117 (110, 125)  | 1                 |         | 77 (71, 83)    | 1                  |         |
| Asian                      | 188 (123, 252) | 2.82 (2.01, 3.95)  |         | 357 (284, 430)  | 3.04 (2.46, 3.77) |         | 207 (155, 259) | 2.69 (2.07, 3.50)  |         |
| Black African              | 515 (270, )    | 7.33 (4.77, 12.53) | <0.0001 | 829 (563, 1094) | 7.07 (5.13, 9.73) | <0.0001 | 432 (249, 616) | 5.63 (3.71, 8.53)  | <0.0001 |
| Black Caribbean            | 235 (61, 409)  | 3.53 (1.68, 7.44)  |         | 778 (468, 1087) | 6.63 (4.49, 9.79) |         | 489 (257, 721) | 6.36 (3.93, 10.30) |         |
| <b>Patient IMD (2015)*</b> |                |                    |         |                 |                   |         |                |                    |         |
| Quintile 1                 | 64 (54, 73)    | 1                  |         | 95 (84, 106)    | 1                 |         | 71 (61, 81)    | 1                  |         |
| Quintiles 2,3,4            | 61 (55, 67)    | 0.97 (0.81, 1.15)  | 0.0001  | 95 (88, 102)    | 1.00 (0.87, 1.15) | <0.0001 | 72 (65, 78)    | 1.01 (0.86, 1.19)  | <0.0001 |
| Quintile 5                 | 92 (77, 107)   | 1.45 (1.17, 1.79)  |         | 241 (218, 265)  | 2.54 (2.19, 2.95) |         | 152 (134, 170) | 2.15 (1.80, 2.57)  |         |
| <b>Urban/Rural class</b>   |                |                    |         |                 |                   |         |                |                    |         |
| Conurbation                | 54 (45, 64)    | 1                  |         | 165 (148, 181)  | 1                 |         | 120 (106, 133) | 1                  |         |
| City/Town                  | 72 (66, 78)    | 1.33 (1.10, 1.60)  | 0.0078  | 108 (101, 116)  | 0.66 (0.59, 0.74) | <0.0001 | 77 (70, 83)    | 0.64 (0.56, 0.74)  | <0.0001 |
| Rural                      | 62 (50, 74)    | 1.15 (0.89, 1.47)  |         | 85 (71, 99)     | 0.52 (0.43, 0.62) |         | 60 (48, 72)    | 0.50 (0.40, 0.62)  |         |

\*1=least deprived - 5=most deprived

Table 4: Prevalence (with 95% CI) of diagnosed HIV recorded in CPRD (per 100,000 persons) by gender, age, ethnicity and patient IMD, for London and outside London.

| <b>London</b>             |                            |                   |                   |
|---------------------------|----------------------------|-------------------|-------------------|
|                           | <b>Prevalence (95% CI)</b> |                   |                   |
|                           | <b>2005</b>                | <b>2010</b>       | <b>2015</b>       |
| All                       | 140 (129, 151)             | 230 (216, 244)    | 282 (267, 297)    |
| <b>Gender</b>             |                            |                   |                   |
| Males                     | 191 (172, 209)             | 294 (271, 317)    | 369 (344, 395)    |
| Females                   | 91 (78, 103)               | 170 (153, 187)    | 199 (181, 217)    |
| <b>Age</b>                |                            |                   |                   |
| 16-44                     | 168 (152, 184)             | 234 (215, 253)    | 229 (210, 249)    |
| >44                       | 103 (88, 117)              | 226 (205, 247)    | 341 (316, 365)    |
| <b>Ethnicity</b>          |                            |                   |                   |
| White                     | 127 (112, 143)             | 183 (164, 202)    | 224 (202, 246)    |
| Asian                     | 45 (17, 72)                | 84 (50, 119)      | 96 (60, 131)      |
| Black African             | 1465 (1205, 1726)          | 2350 (2055, 2646) | 2597 (2294, 2899) |
| Black Caribbean           | 195 (97, 294)              | 431 (291, 572)    | 538 (381, 695)    |
| <b>Patient IMD (2015)</b> |                            |                   |                   |
| Quantile 1                | 32 (19, 45)                | 86 (65, 107)      | 121 (96, 146)     |
| Quantiles 2,3,4           | 136 (122, 149)             | 212 (195, 228)    | 256 (238, 274)    |
| Quantile 5                | 268 (230, 306)             | 444 (397, 491)    | 544 (492, 596)    |
| <b>Outside London</b>     |                            |                   |                   |
|                           | <b>Prevalence (95% CI)</b> |                   |                   |
|                           | <b>2005</b>                | <b>2010</b>       | <b>2015</b>       |
| All                       | 38 (36, 41)                | 64 (61, 67)       | 81 (77, 85)       |
| <b>Gender</b>             |                            |                   |                   |
| Males                     | 50 (46, 54)                | 81 (76, 86)       | 105 (99, 110)     |
| Females                   | 26 (23, 29)                | 48 (44, 52)       | 58 (54, 62)       |
| <b>Age</b>                |                            |                   |                   |
| 16-44                     | 55 (51, 59)                | 78 (72, 83)       | 82 (76, 87)       |
| >44                       | 22 (19, 25)                | 52 (48, 56)       | 80 (76, 85)       |
| <b>Ethnicity</b>          |                            |                   |                   |
| White                     | 29 (26, 32)                | 46 (43, 50)       | 60 (56, 64)       |
| Asian                     | 37 (16, 59)                | 40 (21, 59)       | 55 (34, 76)       |
| Black African             | 2537 (2110, 2964)          | 3663 (3236, 4091) | 3933 (3514, 4353) |
| Black Caribbean           | 135 (35, 236)              | 347 (195, 499)    | 484 (308, 660)    |
| <b>Patient IMD (2015)</b> |                            |                   |                   |
| Quantile 1                | 19 (16, 23)                | 31 (26, 35)       | 42.58 (37, 48)    |
| Quantiles 2,3,4           | 35 (32, 38)                | 60 (56, 65)       | 77 (72, 81)       |
| Quantile 5                | 82 (72, 91)                | 132 (121, 144)    | 159 (146, 172)    |

1 Figure legends:

2  
3 Figure 1: Trend in HIV testing rates per 100,000 person years for the period 2000-2015 by gender  
4 and age group, with and without inclusion of antenatal testing.  
5

6  
7 Figure 2: Trend in the percentage of HIV tests that were positive for the period 2000-2015 by gender  
8 and age group, with and without inclusion of antenatal testing.  
9

10  
11  
12  
13  
14  
15  
16  
17  
18  
19  
20  
21  
22  
23  
24  
25  
26  
27  
28  
29  
30  
31  
32  
33  
34  
35  
36  
37  
38  
39  
40  
41  
42  
43  
44  
45  
46  
47  
48  
49  
50  
51  
52  
53  
54  
55  
56  
57  
58  
59  
60

For peer review only

1  
2  
3  
4  
5  
6  
7  
8  
9  
10  
11  
12  
13  
14  
15  
16  
17  
18  
19  
20  
21  
22  
23  
24  
25  
26  
27  
28  
29  
30  
31  
32  
33  
34  
35  
36  
37  
38  
39  
40  
41  
42  
43  
44  
45  
46  
47  
48  
49  
50  
51  
52  
53  
54  
55  
56  
57  
58  
59  
60

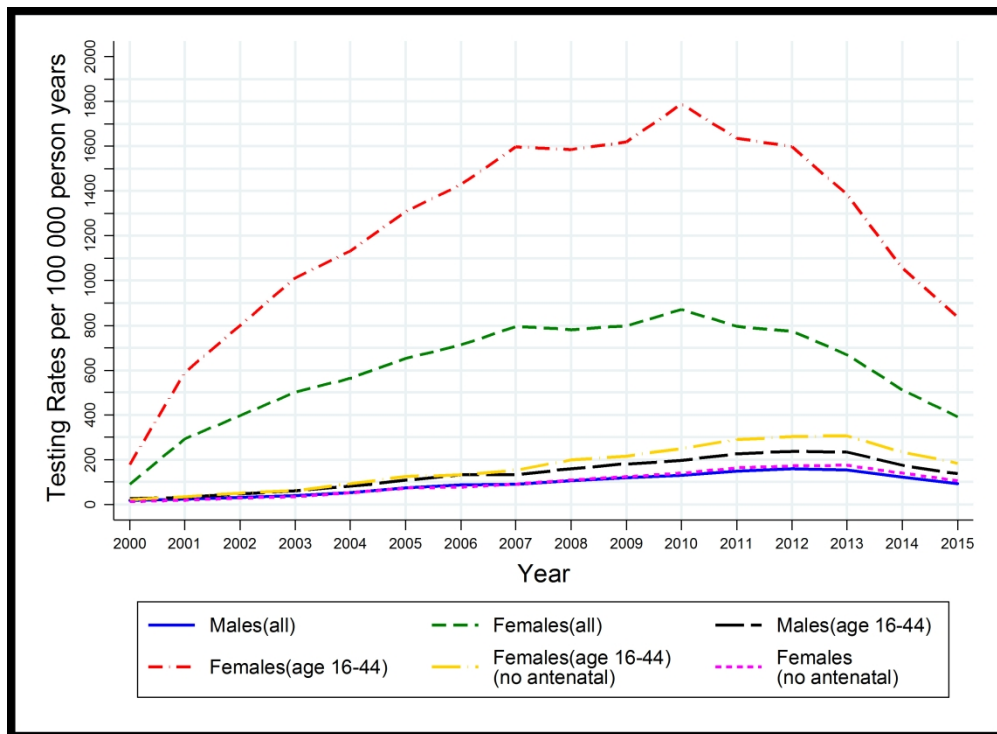

Figure 1 : Trend in HIV testing rates per 100,000 person years for the period 2000-2015 by gender and age group, with and without inclusion of antenatal testing

887x649mm (96 x 96 DPI)

1  
2  
3  
4  
5  
6  
7  
8  
9  
10  
11  
12  
13  
14  
15  
16  
17  
18  
19  
20  
21  
22  
23  
24  
25  
26  
27  
28  
29  
30  
31  
32  
33  
34  
35  
36  
37  
38  
39  
40  
41  
42  
43  
44  
45  
46  
47  
48  
49  
50  
51  
52  
53  
54  
55  
56  
57  
58  
59  
60

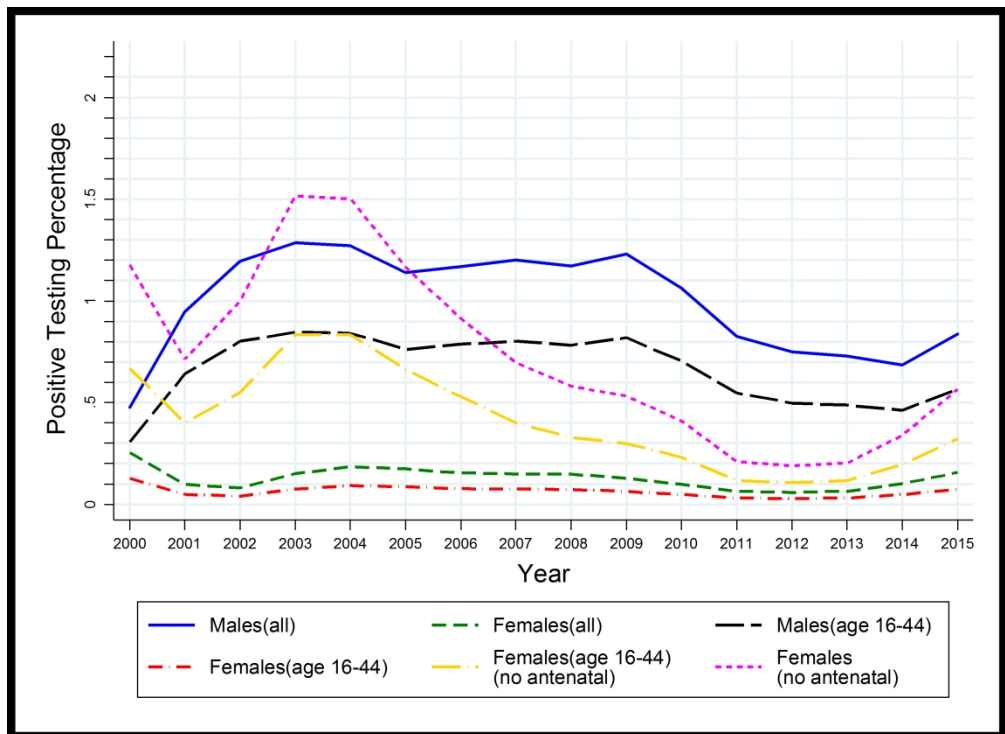

Figure 2: Trend in the percentage of HIV tests that were positive for the period 2000-2015 by gender and age group, with and without inclusion of antenatal testing.

283x207mm (300 x 300 DPI)

1  
2  
3  
4  
5  
6  
7  
8  
9  
10  
11  
12  
13  
14  
15  
16  
17  
18  
19  
20  
21  
22  
23  
24  
25  
26  
27  
28  
29  
30  
31  
32  
33  
34  
35  
36  
37  
38  
39  
40  
41  
42  
43  
44  
45  
46  
47  
48  
49  
50  
51  
52  
53  
54  
55  
56  
57  
58  
59  
60

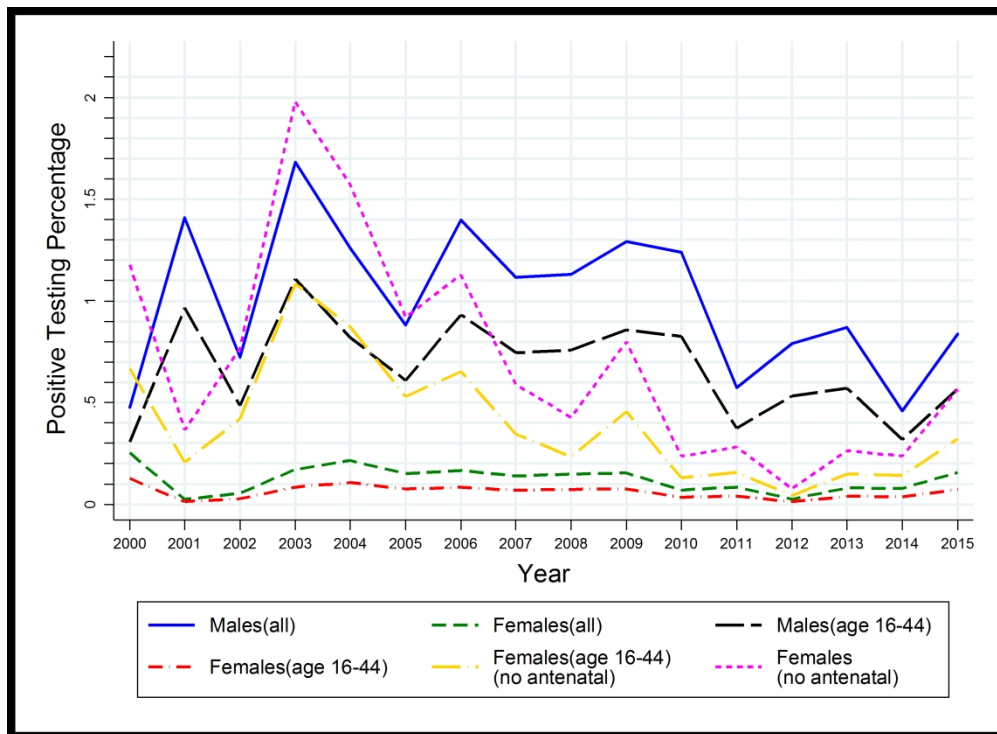

Supplementary figure: Trend (unsmoothed graph) in the percentage of HIV tests that were positive for the period 2000-2015 by gender and age group, with and without inclusion of antenatal testing.

283x207mm (300 x 300 DPI)

Trends in HIV testing in the UK Primary Care setting: A 15 year retrospective cohort study 2000 to 2015

Supplementary tables

Supplementary table 1: HIV testing rates (per 100,000 person years) for years 2000-2015 (adults >16 years).

| Year | Males, all |       |                 | Females, all |       |                 | Females, excluding antenatal |       |                 |
|------|------------|-------|-----------------|--------------|-------|-----------------|------------------------------|-------|-----------------|
|      | N          | Rate  | 95% C.I.        | N            | Rate  | 95% C.I.        | N                            | Rate  | 95% C.I.        |
| 2000 | 1277056    | 16.4  | (14.2 , 18.7)   | 1332528      | 89.0  | (83.9 , 94.1)   | 1331517                      | 12.8  | (10.8 , 14.7)   |
| 2001 | 1299140    | 21.9  | (19.3 , 24.4)   | 1352604      | 293.1 | (283.9 , 302.3) | 1348950                      | 20.2  | (17.8 , 22.7)   |
| 2002 | 1317701    | 31.4  | (28.3 , 34.5)   | 1367949      | 396.3 | (385.7 , 406.9) | 1363158                      | 28.7  | (25.8 , 31.6)   |
| 2003 | 1341378    | 39.9  | (36.5 , 43.3)   | 1388107      | 501.9 | (490.0 , 513.7) | 1382140                      | 36.5  | (33.3 , 39.8)   |
| 2004 | 1359662    | 52.5  | (48.6 , 56.4)   | 1403681      | 563.0 | (550.5 , 575.5) | 1397351                      | 54.7  | (50.7 , 58.7)   |
| 2005 | 1374451    | 74.2  | (69.6 , 78.8)   | 1418325      | 653.1 | (639.7 , 666.6) | 1411272                      | 77.0  | (72.3 , 81.6)   |
| 2006 | 1390451    | 87.5  | (82.5 , 92.4)   | 1433622      | 711.6 | (697.7 , 725.6) | 1426111                      | 80.9  | (76.0 , 85.7)   |
| 2007 | 1405428    | 89.4  | (84.3 , 94.4)   | 1447828      | 795.2 | (780.5 , 809.9) | 1439651                      | 94.3  | (89.1 , 99.4)   |
| 2008 | 1409645    | 106.6 | (101.1 , 112.1) | 1455081      | 781.9 | (767.4 , 796.5) | 1447676                      | 113.1 | (107.4 , 118.7) |
| 2009 | 1418613    | 120.0 | (114.3 , 125.8) | 1463654      | 797.9 | (783.2 , 812.6) | 1456530                      | 128.6 | (122.6 , 134.6) |
| 2010 | 1424751    | 130.2 | (124.2 , 136.2) | 1470650      | 870.7 | (855.4 , 886.0) | 1463009                      | 145.3 | (139.0 , 151.6) |
| 2011 | 1421140    | 147.2 | (140.8 , 153.6) | 1474837      | 795.9 | (781.2 , 810.5) | 1468256                      | 169.0 | (162.1 , 175.8) |
| 2012 | 1427981    | 159.5 | (152.9 , 166.2) | 1482930      | 772.8 | (758.4 , 787.1) | 1476875                      | 176.7 | (169.7 , 183.6) |
| 2013 | 1430211    | 152.9 | (146.4 , 159.4) | 1486620      | 669.5 | (656.2 , 682.9) | 1481702                      | 178.9 | (171.9 , 185.9) |
| 2014 | 1436279    | 121.6 | (115.8 , 127.4) | 1487194      | 511.7 | (500.1 , 523.4) | 1483581                      | 141.8 | (135.6 , 148.1) |
| 2015 | 1421880    | 92.5  | (87.4 , 97.6)   | 1472023      | 391.5 | (381.2 , 401.7) | 1469400                      | 108.4 | (103.0 , 113.9) |

Supplementary table 2: HIV testing rates (per 100,000 person years) for years 2000-2015 (adults aged 16-44 years).

| Year | Males, all |       |                 | Females, all |        |                   | Females, excluding antenatal |       |                 |
|------|------------|-------|-----------------|--------------|--------|-------------------|------------------------------|-------|-----------------|
|      | N          | Rate  | 95% C.I.        | N            | Rate   | 95% C.I.          | N                            | Rate  | 95% C.I.        |
| 2000 | 671088     | 25.5  | (21.6 , 29.4)   | 655488       | 177.4  | (167.2 , 187.7)   | 654477                       | 22.5  | (18.8 , 26.1)   |
| 2001 | 681216     | 31.9  | (27.6 , 36.2)   | 665358       | 589.8  | (571.2 , 608.3)   | 661708                       | 35.8  | (31.2 , 40.4)   |
| 2002 | 688746     | 46.8  | (41.5 , 52.0)   | 672213       | 799.5  | (778.0 , 821.0)   | 667427                       | 52.3  | (46.7 , 57.8)   |
| 2003 | 698982     | 60.5  | (54.7 , 66.4)   | 681748       | 1012.9 | (989.0 , 1036.9)  | 675788                       | 66.7  | (60.5 , 73.0)   |
| 2004 | 706120     | 80.9  | (74.1 , 87.6)   | 688504       | 1132.5 | (1107.2 , 1157.8) | 682186                       | 98.4  | (90.7 , 106.1)  |
| 2005 | 710489     | 107.4 | (99.7 , 115.1)  | 694232       | 1308.9 | (1281.8 , 1335.9) | 687190                       | 134.0 | (125.2 , 142.8) |
| 2006 | 714842     | 131.1 | (122.6 , 139.6) | 700086       | 1428.5 | (1400.4 , 1456.7) | 692589                       | 139.8 | (130.7 , 148.8) |
| 2007 | 717434     | 133.5 | (124.9 , 142.2) | 704167       | 1598.2 | (1568.4 , 1627.9) | 696009                       | 160.6 | (151.0 , 170.3) |
| 2008 | 711542     | 159.1 | (149.7 , 168.5) | 702985       | 1586.6 | (1556.9 , 1616.3) | 695600                       | 206.5 | (195.4 , 217.5) |
| 2009 | 708782     | 181.0 | (170.9 , 191.1) | 700970       | 1618.4 | (1588.3 , 1648.5) | 693867                       | 225.9 | (214.3 , 237.4) |
| 2010 | 702732     | 195.7 | (185.2 , 206.2) | 696368       | 1789.0 | (1757.3 , 1820.6) | 688743                       | 262.4 | (250.0 , 274.7) |
| 2011 | 690732     | 225.9 | (214.5 , 237.2) | 689820       | 1636.2 | (1605.6 , 1666.7) | 683258                       | 301.1 | (287.7 , 314.5) |
| 2012 | 685037     | 236.9 | (225.3 , 248.6) | 685234       | 1598.0 | (1567.8 , 1628.2) | 679201                       | 313.2 | (299.6 , 326.8) |
| 2013 | 675812     | 232.6 | (221.0 , 244.2) | 677984       | 1385.4 | (1357.0 , 1413.7) | 673088                       | 315.1 | (301.4 , 328.9) |
| 2014 | 668263     | 174.8 | (164.6 , 185.0) | 667048       | 1056.2 | (1031.2 , 1081.2) | 663464                       | 238.6 | (226.5 , 250.8) |
| 2015 | 639033     | 136.6 | (127.4 , 145.9) | 638248       | 839.3  | (816.5 , 862.1)   | 635636                       | 190.1 | (179.0 , 201.1) |



1  
2  
3 **Trends in HIV testing in the UK Primary Care setting: A 15 year retrospective cohort study 2000 to**  
4 **2015**  
5  
6  
7

8 **Supplementary Material**  
9

10  
11 **Page 2 Appendix 1: Read & OXMIS codes denoting an HIV test used to identify patients who have**  
12 **ever had a HIV test recorded in primary care (Evans *et al* 2009<sup>26</sup>)**  
13

14  
15 **Page 3 Appendix 2: Read & OXMIS codes denoting HIV positive status used to identify HIV positive**  
16 **patients who have their HIV positive status recorded in primary care (Evans *et al* 2009<sup>26</sup>).**  
17

18  
19 **Page 4 Appendix 3: Pregnancy/Delivery/Abortion medcodes (Jackson *et al* <sup>50</sup>)**  
20  
21  
22  
23  
24  
25  
26  
27  
28  
29  
30  
31  
32  
33  
34  
35  
36  
37  
38  
39  
40  
41  
42  
43  
44  
45  
46  
47  
48  
49  
50  
51  
52  
53  
54  
55  
56  
57  
58  
59  
60

**Appendix 1: Read & OXMIS codes denoting an HIV test used to identify patients who have ever had a HIV test recorded in primary care (Evans *et al* 2009<sup>26</sup>)**

| Code    | READ/<br>OXMIS | Code description                                             | Certainty of<br>HIV+ test |
|---------|----------------|--------------------------------------------------------------|---------------------------|
| 6827.11 | READ           | HIV screening                                                | Definite                  |
| 43C..00 | READ           | HTLV-3 antibody test                                         | Definite                  |
| 43C..11 | READ           | Aids antibody test                                           | Definite                  |
| 43C..12 | READ           | Human immunodeficiency viral test                            | Definite                  |
| 43C1.00 | READ           | Blood sent for HTLV-3 serology                               | Definite                  |
| 43C2.00 | READ           | HTLV-3 antibody negative                                     | Definite                  |
| 43C2.11 | READ           | HIV negative                                                 | Definite                  |
| 43CZ.00 | READ           | HTLV-3 antibody NOS                                          | Definite                  |
| 43d5.00 | READ           | HIV antibody/antigen (Duo)                                   | Definite                  |
| 43d6.00 | READ           | HTLV 1 antibody level                                        | Ambiguous                 |
| 43dc.00 | READ           | HTLV 2 antibody level                                        | Ambiguous                 |
| 43h2.00 | READ           | HIV 1 PCR                                                    | Definite                  |
| 43j7.00 | READ           | HIV 1 nucleic acid detection                                 | Definite                  |
| 43V1.00 | READ           | Absolute CD4 count                                           | Definite                  |
| 43VE.00 | READ           | CD4/CD8 ratio                                                | Definite                  |
| 43VH.00 | READ           | Percentage CD4 count                                         | Definite                  |
| 43Vo.00 | READ           | Absolute CD4 (T4 cells) count                                | Definite                  |
| 43Vp.00 | READ           | Percentage CD4 (T4 cells) count                              | Definite                  |
| 43W7.00 | READ           | HIV1 antibody level                                          | Definite                  |
| 43W8.00 | READ           | HIV2 antibody level                                          | Definite                  |
| 43WK.00 | READ           | Human immunodeficiency virus antibody level                  | Definite                  |
| 4J34.00 | READ           | HIV viral load                                               | Definite                  |
| 4J35.00 | READ           | HIV p24 antigen level                                        | Definite                  |
| 4JDT.00 | READ           | HIV serology                                                 | Definite                  |
| 4JR7.00 | READ           | HIV screening test                                           | Definite                  |
| 62b..00 | READ           | Antenatal HIV screening                                      | Definite                  |
| 6827.00 | READ           | AIDS (HTLV-III) screening                                    | Definite                  |
| R109.00 | READ           | [D]Laboratory evidence of human immunodeficiency virus [HIV] | Definite                  |
| ZV01800 | READ           | [V]Human immunodeficiency virus - negative                   | Definite                  |
| ZV73700 | READ           | [V]Special screening exam for human immunodeficiency virus   | Definite                  |
| L1111PV | OXMIS          | HIV ANTIBODY TEST POSITIVE                                   | Definite                  |
| L 153P  | OXMIS          | HTVL-AIDS-III ANTIBODY TEST POSITIVE                         | Definite                  |
| L 153   | OXMIS          | HTVL-AIDS-III ANTIBODY TEST                                  | Definite                  |
| L1111NE | OXMIS          | HIV ANTIBODY TEST NEGATIVE                                   | Definite                  |
| L 153N  | OXMIS          | HTVL-AIDS-III ANTIBODY TEST NEGATIVE                         | Definite                  |
| 65VE.00 | READ           | Notification of AIDS                                         | Ambiguous                 |
| 43j8.00 | READ           | HTLV 1 nucleic acid detection                                | Ambiguous                 |

**Appendix 2: Read & OXMIS codes denoting HIV positive status used to identify HIV positive patients who have their HIV positive status recorded in primary care (Evans *et al* 2009<sup>26</sup>).**

| Code    | Read/OXMIS | Code description                                              | Certainty of HIV+ status |
|---------|------------|---------------------------------------------------------------|--------------------------|
| 65QA.00 | READ       | AIDS carrier                                                  | Definite                 |
| A789700 | READ       | HIV disease resulting other types of non-Hodgkin's lymphoma   | Definite                 |
| A789800 | READ       | HIV disease resulting in multiple malignant neoplasms         | Definite                 |
| A788.00 | READ       | Acquired immune deficiency syndrome                           | Definite                 |
| A788500 | READ       | Human immunodeficiency virus with secondary infection         | Definite                 |
| A788X00 | READ       | HIV disease resulting/unspcf infectious+parasitic disease     | Definite                 |
| A789200 | READ       | HIV disease resulting in candidiasis                          | Definite                 |
| A789500 | READ       | HIV disease resulting in Kaposi's sarcoma                     | Definite                 |
| AyuC100 | READ       | [X]HIV disease resulting in other viral infections            | Definite                 |
| AyuC700 | READ       | [X]HIV dis reslt/oth mal neopl/lymph,h'matopoetc+reltd tissu  | Definite                 |
| A788000 | READ       | Acute human immunodeficiency virus infection                  | Definite                 |
| A788100 | READ       | Asymptomatic human immunodeficiency virus infection           | Definite                 |
| A789300 | READ       | HIV disease resulting in Pneumocystis carinii pneumonia       | Definite                 |
| A789600 | READ       | HIV disease resulting in Burkitt's lymphoma                   | Definite                 |
| A798.00 | READ       | Retrovirus infection                                          | Definite                 |
| AyuC200 | READ       | [X]HIV disease resulting in other mycoses                     | Definite                 |
| AyuCA00 | READ       | [X]HIV disease resulting in multiple diseases CE              | Definite                 |
| A788U00 | READ       | HIV disease result/haematological+immunologic abnorms,NEC     | Definite                 |
| A789.00 | READ       | Human immunodef virus resulting in other disease              | Definite                 |
| AyuC000 | READ       | [X]HIV disease resulting in other bacterial infections        | Definite                 |
| AyuC800 | READ       | [X]HIV disease resulting in other malignant neoplasms         | Definite                 |
| 43C3.11 | READ       | HIV positive                                                  | Definite                 |
| A788y00 | READ       | Human immunodeficiency virus with other clinical findings     | Definite                 |
| Eu02400 | READ       | [X]Dementia in human immunodef virus [HIV] disease            | Definite                 |
| ZV01A00 | READ       | [V]Asymptomatic human immunodeficiency virus infection status | Definite                 |
| A789400 | READ       | HIV disease resulting in multiple infections                  | Definite                 |
| AyuC500 | READ       | [X]HIV disease resulting/unspcf infectious+parasitic disease  | Definite                 |
| AyuC900 | READ       | [X]HIV disease resulting in unspecified malignant neoplasm    | Definite                 |
| AyuCC00 | READ       | [X]HIV disease resulting in other specified conditions        | Definite                 |
| 43C3.00 | READ       | HTLV-3 antibody positive                                      | Definite                 |
| A788W00 | READ       | HIV disease resulting in unspecified malignant neoplasm       | Definite                 |
| A789X00 | READ       | HIV dis reslt/oth mal neopl/lymph,h'matopoetc+                | Definite                 |
| AyuC300 | READ       | [X]HIV disease resulting in multiple infections               | Definite                 |
| AyuC400 | READ       | [X]HIV disease resulting/other infectious+parasitic diseases  | Definite                 |
| AyuC600 | READ       | [X]HIV disease resulting in other non-Hodgkin's lymphoma      | Definite                 |
| A788600 | READ       | Human immunodeficiency virus with secondary cancers           | Definite                 |
| A788z00 | READ       | Acquired human immunodeficiency virus infection syndrome NOS  | Definite                 |
| A789A00 | READ       | HIV disease resulting in wasting syndrome                     | Definite                 |
| 65VE.00 | READ       | Notification of AIDS                                          | Definite                 |
| A788.11 | READ       | Human immunodeficiency virus infection                        | Definite                 |
| A788200 | READ       | HIV infection with persistent generalised lymphadenopathy     | Definite                 |
| A788300 | READ       | Human immunodeficiency virus with constitutional disease      | Definite                 |
| A788400 | READ       | Human immunodeficiency virus with neurological disease        | Definite                 |

**Appendix 2 (CONT'D): Read & OXMIS codes denoting HIV positive status used to identify HIV positive patients who have their HIV positive status recorded in primary care.**

| Code    | Read/OXMIS | Code description                                              | Certainty of HIV+ status |
|---------|------------|---------------------------------------------------------------|--------------------------|
| A788V00 | READ       | HIV disease resulting in multiple diseases CE                 | Definite                 |
| A789100 | READ       | HIV disease resulting in cytomegaloviral disease              | Definite                 |
| AyuC.00 | READ       | [X]Human immunodeficiency virus disease                       | Definite                 |
| AyuCD00 | READ       | [X]Unspecified human immunodeficiency virus [HIV] disease     | Definite                 |
| A789000 | READ       | HIV disease resulting in mycobacterial infection              | Definite                 |
| A789900 | READ       | HIV disease resulting in lymphoid interstitial pneumonitis    | Definite                 |
| AyuCB00 | READ       | [X]HIV disease result/haematological+immunologic abnorms,NEC  | Definite                 |
| R109.00 | READ       | [D]Laboratory evidence of human immunodeficiency virus [HIV]  | Definite                 |
| ZV01A00 | READ       | [V]Asymptomatic human immunodeficiency virus infection status | Definite                 |
| 799MD   | OXMIS      | AIDS                                                          | Definite                 |
| 799CA   | OXMIS      | AIDS CARRIER                                                  | Definite                 |
| L1111PV | OXMIS      | HIV ANTIBODY TEST POSITIVE                                    | Definite                 |
| L7990A  | OXMIS      | ACQUIRED IMMUNE DEFICIENCY SYNDROME                           | Definite                 |
| L 153P  | OXMIS      | HTVL-AIDS-III ANTIBODY TEST POSITIVE                          | Definite                 |
| 43V1.00 | READ       | Absolute CD4 count                                            | Ambiguous                |
| AyuD800 | READ       | [X]Retrovirus infections, not elsewhere classified            | Ambiguous                |
| AyuKM00 | READ       | [X]Retrovirus/cause of diseases classified to other chapters  | Ambiguous                |
| 43VE.00 | READ       | CD4/CD8 ratio                                                 | Ambiguous                |
| A7y0100 | READ       | Retrovirus as cause of diseases classified to other chapters  | Ambiguous                |
| 43VH.00 | READ       | Percentage CD4 count                                          | Ambiguous                |
| 4J34.00 | READ       | HIV viral load                                                | Ambiguous                |
| 4J35.00 | READ       | HIV p24 antigen level                                         | Ambiguous                |
| 43h2.00 | READ       | HIV 1 PCR                                                     | Ambiguous                |
| 43j7.00 | READ       | HIV 1 nucleic acid detection                                  | Ambiguous                |
| 43Vo.00 | READ       | Absolute CD4 (T4 cells) count                                 | Ambiguous                |
| 43Vp.00 | READ       | Percentage CD4 (T4 cells) count                               | Ambiguous                |

**Appendix 3: Pregnancy/Delivery/Abortion medcodes (Jackson *et al*<sup>50</sup>)**

| medcode | readcode | readterm                                   |
|---------|----------|--------------------------------------------|
| 52685   | ZV23000  | [V]Pregnancy with history of infertility   |
| 3030    | 4654     | Urine pregnancy test positive              |
| 73535   | L13z100  | Unspecified pregnancy vomiting - delivered |
| 53514   | Z22D300  | Uncertain viability of pregnancy           |
| 11422   | Z226.00  | Pregnancy problem                          |
| 20623   | ZV4J000  | [V]Problems related to unwanted pregnancy  |
| 99247   | L13y200  | Other pregnancy vomiting - not delivered   |
| 56451   | L13zz00  | Unspecified pregnancy vomiting NOS         |
| 14644   | L166z11  | UTI - urinary tract infection in pregnancy |
| 32975   | 6166     | Pregnant, diaphragm failure                |

|    |        |         |                                                              |
|----|--------|---------|--------------------------------------------------------------|
| 1  |        |         |                                                              |
| 2  |        |         |                                                              |
| 3  | 23495  | L265.00 | Small-for-dates fetus in pregnancy                           |
| 4  | 3766   | L10..00 | Haemorrhage in early pregnancy                               |
| 5  | 56953  | Z235400 | Pendulous pregnant abdomen                                   |
| 6  | 40279  | 7E19012 | Fimbrial extraction of tubal pregnancy                       |
| 7  | 29122  | 7E19011 | Removal of ectopic pregnancy from fallopian tube             |
| 8  | 1748   | 7E08400 | Suction termination of pregnancy                             |
| 9  | 106170 | L21zz00 | Multiple pregnancy NOS                                       |
| 10 | 5357   | 7E08500 | Dilation of cervix and extraction termination of pregnancy   |
| 11 | 14899  | 621Z.00 | Patient pregnant NOS                                         |
| 12 | 61563  | L161300 | Oedema or excessive weight gain in pregnancy - not delivered |
| 13 | 64523  | L091z00 | Delayed/excess haemorrhage NOS following abortive pregnancy  |
| 14 | 20621  | ZV25313 | [V]Admission for termination of pregnancy                    |
| 15 | 20910  | ZV25311 | [V]Admission for termination of pregnancy (TOP)              |
| 16 | 70149  | L16A100 | Glycosuria during pregnancy - delivered                      |
| 17 | 54677  | L167200 | Liver disorder in pregnancy - not delivered                  |
| 18 | 102576 | L051711 | Incomplete termination of pregnancy                          |
| 19 | 36903  | 67AZ.00 | Pregnancy advice NOS                                         |
| 20 | 46448  | Q486.00 | Fetal death due to termination of pregnancy                  |
| 21 | 109697 | 6556    | Pertussis vaccination in pregnancy                           |
| 22 | 85961  | 44Cy.00 | Serum pregnancy associated plasma protein-A MoM measurement  |
| 23 | 20307  | L091.00 | Delayed/excessive haemorrhage following abortive pregnancy   |
| 24 | 37163  | L150z00 | Post-term pregnancy NOS                                      |
| 25 | 94473  | L211z00 | Triplet pregnancy NOS                                        |
| 26 | 47489  | Z22A800 | Undiagnosed pregnancy                                        |
| 27 | 1668   | L182500 | Iron deficiency anaemia of pregnancy                         |
| 28 | 61576  | L211000 | Triplet pregnancy unspecified                                |
| 29 | 25501  | Z22A100 | Low risk pregnancy                                           |
| 30 | 40633  | Z22A600 | Teenage pregnancy                                            |
| 31 | 104440 | 4Q3N.00 | Pregnancy associated plasma protein A level                  |
| 32 | 45413  | L263A11 | Maternal care for reduced fetal heart rate during pregnancy  |
| 33 | 14994  | 6174    | Pregnant, sheath failure                                     |
| 34 | 24170  | L15..00 | Prolonged or post-term pregnancy                             |
| 35 | 66390  | Q0z..00 | Maternal problem unrelated preg affecting fetus/neonate NOS  |
| 36 | 27833  | L13y.00 | Other pregnancy vomiting                                     |
| 37 | 55338  | L123000 | Transient hypertension of pregnancy unspecified              |
| 38 | 99956  | L168400 | Fatigue during pregnancy with postnatal complication         |
| 39 | 71314  | L093.00 | Renal failure following abortive pregnancy                   |
| 40 | 106735 | 9mK0.00 | Pertussis vaccination in pregnancy invitation first letter   |
| 41 | 31449  | 6294    | No A/N care: not known preg.                                 |
| 42 | 100670 | L181100 | Thyroid dysfunction during pregnancy - baby delivered        |
| 43 | 54866  | L030.00 | Abdominal pregnancy                                          |
| 44 | 38882  | L123600 | Transient hypertension of pregnancy                          |
| 45 | 61995  | L03yz00 | Other ectopic pregnancy NOS                                  |
| 46 | 5044   | 13H7.00 | Unwanted pregnancy                                           |
| 47 | 25131  | Z22AD11 | Reported conception - pregnancy                              |
| 48 |        |         |                                                              |
| 49 |        |         |                                                              |
| 50 |        |         |                                                              |
| 51 |        |         |                                                              |
| 52 |        |         |                                                              |
| 53 |        |         |                                                              |
| 54 |        |         |                                                              |
| 55 |        |         |                                                              |
| 56 |        |         |                                                              |
| 57 |        |         |                                                              |
| 58 |        |         |                                                              |
| 59 |        |         |                                                              |
| 60 |        |         |                                                              |

|    |        |         |                                                              |
|----|--------|---------|--------------------------------------------------------------|
| 1  |        |         |                                                              |
| 2  |        |         |                                                              |
| 3  |        |         |                                                              |
| 4  | 21467  | L03y200 | Membranous pregnancy                                         |
| 5  | 48304  | L10z200 | Early pregnancy haemorrhage NOS - not delivered              |
| 6  | 37693  | 13Hd.00 | Teenage pregnancy                                            |
| 7  | 27980  | L166700 | Infections of the genital tract in pregnancy                 |
| 8  | 2638   | L1...00 | Pregnancy complications                                      |
| 9  | 99933  | L092100 | Bowel damage following abortive pregnancy                    |
| 10 | 41122  | L10zz00 | Early pregnancy haemorrhage NOS                              |
| 11 | 37348  | Lyu2500 | [X]Other specified pregnancy-related conditions              |
| 12 | 96757  | L411513 | Vulval varices in pregnancy                                  |
| 13 | 59634  | L411512 | Vaginal varices in pregnancy                                 |
| 14 | 99237  | L411511 | Perineal varices in pregnancy                                |
| 15 | 27451  | L166000 | Genitourinary tract infection in pregnancy unspecified       |
| 16 | 110129 | 6556000 | Pertussis vacc in pregnancy given by other healthcre providr |
| 17 | 107485 | Q014000 | Fetus or neonate affected by unspecified ectopic pregnancy   |
| 18 | 18258  | L167.00 | Liver disorder in pregnancy                                  |
| 19 | 42015  | L16y.00 | Other pregnancy complications                                |
| 20 | 25028  | L09z.00 | Complication NOS following abortion/ectopic/molar pregnancy  |
| 21 | 44734  | 62O8.00 | Pregnancy prolonged - 42 weeks                               |
| 22 | 23831  | ZV22y00 | [V]Other specified pregnant state                            |
| 23 | 41587  | L210z00 | Twin pregnancy NOS                                           |
| 24 | 24063  | 62O7.00 | Pregnancy prolonged - 41 weeks                               |
| 25 | 44650  | L0y..00 | Other specified pregnancy with abortive outcome              |
| 26 | 61284  | L210200 | Twin pregnancy with antenatal problem                        |
| 27 | 54288  | Z22D311 | Query viability of pregnancy                                 |
| 28 | 34938  | L212.00 | Quadruplet pregnancy                                         |
| 29 | 102494 | 8Hh3.00 | Self referral to termination of pregnancy service            |
| 30 | 1686   | 7E08600 | Termination of pregnancy NEC                                 |
| 31 | 70214  | L21z100 | Multiple pregnancy NOS - delivered                           |
| 32 | 64247  | Z235.00 | Observation of shape of pregnant abdomen                     |
| 33 | 23751  | L266.00 | Large-for-dates fetus in pregnancy                           |
| 34 | 39359  | L385.00 | Failed or difficult intubation during pregnancy              |
| 35 | 64500  | L183.11 | Pregnancy and drug dependence                                |
| 36 | 73917  | L10y200 | Other haemorrhage in early pregnancy - not delivered         |
| 37 | 255    | L05..12 | Termination of pregnancy                                     |
| 38 | 15433  | L21..00 | Multiple pregnancy                                           |
| 39 | 20439  | L123.00 | Transient hypertension of pregnancy                          |
| 40 | 16775  | L16E.00 | Pregnancy pruritus                                           |
| 41 | 53921  | L161000 | Oedema or excessive weight gain in pregnancy, unspecified    |
| 42 | 44770  | L191.00 | Continuing pregnancy after abortion of one fetus or more     |
| 43 | 29205  | 4453    | Serum pregnancy test positive                                |
| 44 | 46577  | 66AX.00 | Diabetes: shared care in pregnancy - diabetol and obstet     |
| 45 | 73455  | Q015200 | Fetus or neonate affected by triplet pregnancy               |
| 46 | 41625  | L13yz00 | Other pregnancy vomiting NOS                                 |
| 47 | 60345  | M240500 | Alopecia of pregnancy                                        |
| 48 | 107957 | 115V.00 | No history of ectopic pregnancy                              |
| 49 |        |         |                                                              |
| 50 |        |         |                                                              |
| 51 |        |         |                                                              |
| 52 |        |         |                                                              |
| 53 |        |         |                                                              |
| 54 |        |         |                                                              |
| 55 |        |         |                                                              |
| 56 |        |         |                                                              |
| 57 |        |         |                                                              |
| 58 |        |         |                                                              |
| 59 |        |         |                                                              |
| 60 |        |         |                                                              |

|    |        |         |                                                              |
|----|--------|---------|--------------------------------------------------------------|
| 1  |        |         |                                                              |
| 2  |        |         |                                                              |
| 3  | 6580   | ZV23800 | [V]Supervision of high-risk pregnancy due to social problems |
| 4  | 61182  | L211100 | Triplet pregnancy - delivered                                |
| 5  | 30365  | Z22AA00 | Wanted pregnancy                                             |
| 6  | 26852  | ZV23400 | [V]Pregnancy with other poor obstetric history               |
| 7  | 30817  | 6212    | Pregnant - blood test confirms                               |
| 8  | 72014  | L212z00 | Quadruplet pregnancy NOS                                     |
| 9  | 12521  | L161.11 | Excessive weight gain in pregnancy                           |
| 10 | 41959  | L171300 | Maternal gonorrhoea in pregnancy - baby not yet delivered    |
| 11 | 26201  | Z22AC00 | Pregnancy with uncertain dates                               |
| 12 | 49519  | Z229.00 | Observation of position of pregnancy                         |
| 13 | 107713 | L21y200 | Other multiple pregnancy with antenatal problem              |
| 14 | 36235  | 67A4.00 | Pregnancy exercise advice                                    |
| 15 | 105511 | L21z.00 | Multiple pregnancy NOS                                       |
| 16 | 65783  | L030000 | Delivery of viable fetus in abdominal pregnancy              |
| 17 | 106267 | L03y300 | Combined or heterotopic pregnancy                            |
| 18 | 2278   | 8M6..00 | Requests pregnancy termination                               |
| 19 | 110448 | Lyu0.00 | [X]Pregnancy with abortive outcome                           |
| 20 | 99006  | Q014100 | Fetus or neonate affected by abdominal ectopic pregnancy     |
| 21 | 40357  | L2D..00 | Retained intrauterine contraceptive device in pregnancy      |
| 22 | 54293  | Q015.00 | Fetus or neonate affected by multiple pregnancy              |
| 23 | 22557  | Z22B100 | Single pregnancy                                             |
| 24 | 15338  | 621A.00 | Pregnancy unplanned ? wanted                                 |
| 25 | 6649   | L166800 | Urinary tract infection complicating pregnancy               |
| 26 | 49855  | Q015100 | Fetus or neonate affected by twin pregnancy                  |
| 27 | 40825  | Z22B800 | Undiagnosed multiple pregnancy                               |
| 28 | 35509  | 624..00 | A/N care: precious pregnancy                                 |
| 29 | 20197  | L211.00 | Triplet pregnancy                                            |
| 30 | 46270  | ZV22z00 | [V]Unspecified pregnant state                                |
| 31 | 67098  | L183300 | Drug dependence during pregnancy - baby not yet delivered    |
| 32 | 23373  | L150.00 | Post-term pregnancy                                          |
| 33 | 1357   | L210100 | Twin pregnancy - delivered                                   |
| 34 | 45729  | Z22D.00 | Observation of viability of pregnancy                        |
| 35 | 44733  | L0z..00 | Pregnancy with abortive outcome NOS                          |
| 36 | 11760  | L13z.00 | Unspecified pregnancy vomiting                               |
| 37 | 18500  | Z22D100 | Viable pregnancy                                             |
| 38 | 69686  | L417000 | Cerebral venous thrombosis in pregnancy                      |
| 39 | 53661  | L13z200 | Unspecified pregnancy vomiting - not delivered               |
| 40 | 22183  | 957..11 | Prescription exempt form-preg                                |
| 41 | 106378 | 9mK..00 | Pertussis vaccination in pregnancy invitation                |
| 42 | 12230  | L263900 | Maternal care for fetal tachycardia during pregnancy         |
| 43 | 22193  | Z229100 | Intrauterine pregnancy                                       |
| 44 | 15061  | L13..12 | Hyperemesis of pregnancy                                     |
| 45 | 14877  | 621B.00 | Pregnant - ? planned                                         |
| 46 | 27672  | 7E13100 | Excision of ectopic ovarian pregnancy                        |
| 47 | 1744   | L03..00 | Ectopic pregnancy                                            |
| 48 |        |         |                                                              |
| 49 |        |         |                                                              |
| 50 |        |         |                                                              |
| 51 |        |         |                                                              |
| 52 |        |         |                                                              |
| 53 |        |         |                                                              |
| 54 |        |         |                                                              |
| 55 |        |         |                                                              |
| 56 |        |         |                                                              |
| 57 |        |         |                                                              |
| 58 |        |         |                                                              |
| 59 |        |         |                                                              |
| 60 |        |         |                                                              |

|    |        |         |                                                              |
|----|--------|---------|--------------------------------------------------------------|
| 1  |        |         |                                                              |
| 2  |        |         |                                                              |
| 3  |        |         |                                                              |
| 4  | 5693   | L16A.00 | Glycosuria during pregnancy                                  |
| 5  | 36394  | L16C.00 | Pregnancy induced oedema+proteinuria without hypertension    |
| 6  | 73914  | L412511 | Thrombophlebitis of legs in pregnancy                        |
| 7  | 53849  | L16y000 | Other pregnancy complication unspecified                     |
| 8  |        |         |                                                              |
| 9  | 105943 | L165300 | Asymptomatic bacteriuria in pregnancy - not delivered        |
| 10 | 36421  | L167z00 | Liver disorder in pregnancy NOS                              |
| 11 | 25872  | L16yz00 | Other pregnancy complication NOS                             |
| 12 | 60309  | Q0y..00 | Maternal problems unrelated preg affecting fetus/neonate OS  |
| 13 | 67728  | L150200 | Post-term pregnancy - not delivered                          |
| 14 | 28103  | Z22A300 | Concealed pregnancy                                          |
| 15 | 21849  | L031.00 | Tubal pregnancy                                              |
| 16 |        |         |                                                              |
| 17 | 54577  | L210000 | Twin pregnancy unspecified                                   |
| 18 | 105654 | L10y100 | Other haemorrhage in early pregnancy - delivered             |
| 19 | 53685  | L410500 | Varicose veins of legs in pregnancy                          |
| 20 | 68930  | L168100 | Fatigue during pregnancy - delivered                         |
| 21 | 68840  | L416200 | Haemorrhoids in pregnancy and puerperium - deliv + p/n comp  |
| 22 | 53167  | L188300 | Abnormal GTT during pregnancy - baby not yet delivered       |
| 23 | 45862  | 7E07114 | Curettage of uterus for termination of pregnancy NEC         |
| 24 | 64366  | L412500 | Superficial thrombophlebitis in pregnancy                    |
| 25 | 13968  | 584D.00 | Antenatal ultrasound confirms intra-uterine pregnancy        |
| 26 | 14925  | L10z.00 | Early pregnancy haemorrhage NOS                              |
| 27 | 61935  | L185.11 | Congenital heart disease in pregnancy                        |
| 28 | 103059 | 7E07111 | Curettage of term pregnancy NEC                              |
| 29 | 16384  | 7E07113 | Curettage of uterus for termination of pregnancy NEC         |
| 30 | 23421  | 615C.00 | IUD failure - pregnant                                       |
| 31 | 3029   | L166500 | Infections of kidney in pregnancy                            |
| 32 | 106517 | L176100 | Other maternal viral disease in pregnancy - baby delivered   |
| 33 | 40964  | L192.00 | Continuing preg after intrauterine death one fetus or more   |
| 34 | 1850   | 7F06012 | Shirodkar suture in pregnancy                                |
| 35 | 30302  | 7F...12 | Pregnancy operations                                         |
| 36 | 28107  | L161.00 | Oedema or excessive weight gain in pregnancy no hypertension |
| 37 | 85960  | 44Cz.00 | Plasma pregnancy associated plasma protein-A MoM             |
| 38 | 44057  | ZV23111 | [V]Pregnancy with history of hydatidiform mole               |
| 39 | 37573  | Z22B900 | Continuing pregnancy after abortion of sibling fetus         |
| 40 | 68694  | Z22C.00 | Observation of measures of pregnancy                         |
| 41 | 49559  | L180300 | Diabetes mellitus during pregnancy - baby not yet delivered  |
| 42 | 29786  | L416600 | Haemorrhoids in pregnancy                                    |
| 43 | 57059  | L187300 | Orthopaedic disorder in pregnancy - baby not yet delivered   |
| 44 | 23334  | L162.11 | Albuminuria in pregnancy without hypertension                |
| 45 | 92579  | L162.13 | Uraemia in pregnancy without hypertension                    |
| 46 | 38312  | L162.12 | Nephropathy NOS in pregnancy without hypertension            |
| 47 | 22215  | Z22A200 | High risk pregnancy                                          |
| 48 | 38346  | ZV22000 | [V]First normal pregnancy supervision                        |
| 49 | 15318  | 6214    | Pregnant - on history                                        |
| 50 | 41504  | L13y000 | Other pregnancy vomiting unspecified                         |
| 51 |        |         |                                                              |
| 52 |        |         |                                                              |
| 53 |        |         |                                                              |
| 54 |        |         |                                                              |
| 55 |        |         |                                                              |
| 56 |        |         |                                                              |
| 57 |        |         |                                                              |
| 58 |        |         |                                                              |
| 59 |        |         |                                                              |
| 60 |        |         |                                                              |



|    |        |         |                                                              |
|----|--------|---------|--------------------------------------------------------------|
| 1  |        |         |                                                              |
| 2  |        |         |                                                              |
| 3  |        |         |                                                              |
| 4  | 72019  | L132200 | Late pregnancy vomiting - not delivered                      |
| 5  | 37386  | 8B68.00 | Pregnancy prophylactic therapy                               |
| 6  | 60877  | L263800 | Maternal care for fetal decelerations during pregnancy       |
| 7  | 107225 | L165z00 | Asymptomatic bacteriuria in pregnancy NOS                    |
| 8  | 54942  | L123100 | Transient hypertension of pregnancy - delivered              |
| 9  | 54701  | ZV23y00 | [V]Other specified high-risk pregnancy                       |
| 10 | 63825  | Q014.00 | Fetus or neonate affected by ectopic pregnancy               |
| 11 | 94804  | 67AB.00 | Preg. prescription exempt adv.                               |
| 12 | 72835  | Q01z.00 | Fetus/neonate affected by maternal complic pregnancy NOS     |
| 13 | 99008  | Q014300 | Fetus or neonate affected by tubal ectopic pregnancy         |
| 14 | 110868 | L181000 | Thyroid dysfunction - unspec whether in pregnancy/puerperium |
| 15 | 66649  | L41z500 | Venous complication of pregnancy, unspecified                |
| 16 | 26286  | L18A000 | Cholestasis of pregnancy                                     |
| 17 | 17947  | 62a..00 | Pregnancy review                                             |
| 18 | 103104 | L176300 | Other maternal viral dis.in pregnancy-baby not yet delivered |
| 19 | 109932 | Z235211 | Globular pregnant abdomen                                    |
| 20 | 68004  | Q01..00 | Fetus/neonate affected by maternal complication of pregnancy |
| 21 | 20240  | 6216    | Pregnant - planned                                           |
| 22 | 65834  | ZV23200 | [V]Pregnancy with history of abortion                        |
| 23 | 7916   | Z254500 | Delivered by caesarean section - pregnancy at term           |
| 24 | 21119  | L182300 | Anaemia during pregnancy - baby not yet delivered            |
| 25 | 9408   | L10y.11 | Bleeding in early pregnancy                                  |
| 26 | 64099  | L168000 | Fatigue during pregnancy unspecified                         |
| 27 | 10278  | L180800 | Diabetes mellitus arising in pregnancy                       |
| 28 | 2602   | L166.11 | Cystitis of pregnancy                                        |
| 29 | 13165  | 621..00 | Patient currently pregnant                                   |
| 30 | 9986   | Z212.11 | Pregnancy care                                               |
| 31 | 66594  | L186.11 | Heart disease during pregnancy                               |
| 32 | 35158  | Z225.00 | Normal pregnancy                                             |
| 33 | 93800  | Z235100 | Ovoid pregnant abdomen                                       |
| 34 | 73727  | L168z00 | Fatigue during pregnancy NOS                                 |
| 35 | 55889  | L175300 | Maternal rubella during pregnancy - baby not yet delivered   |
| 36 | 7517   | 621C.00 | Unplanned pregnancy                                          |
| 37 | 53908  | Lyu0000 | [X]Other ectopic pregnancy                                   |
| 38 | 34173  | L12B.00 | Proteinuric hypertension of pregnancy                        |
| 39 | 35514  | 624Z.00 | A/N care: precious preg. NOS                                 |
| 40 | 15065  | 8B7..11 | Pregnancy vitamin/iron prophyl                               |
| 41 | 109465 | L184300 | Mental disorder during pregnancy - baby not yet delivered    |
| 42 | 24038  | 13S..00 | Pregnancy benefits                                           |
| 43 | 16215  | 6211    | Pregnant - urine test confirms                               |
| 44 | 35592  | 6213    | Pregnant - V.E. confirms                                     |
| 45 | 25254  | Z21..00 | Care relating to reproduction and pregnancy                  |
| 46 | 46609  | Z22C800 | Number of lost pregnancies                                   |
| 47 | 29692  | 615C.11 | Pregnant, IUD failure                                        |
| 48 | 50440  | Z22A500 | Biochemical pregnancy                                        |
| 49 |        |         |                                                              |
| 50 |        |         |                                                              |
| 51 |        |         |                                                              |
| 52 |        |         |                                                              |
| 53 |        |         |                                                              |
| 54 |        |         |                                                              |
| 55 |        |         |                                                              |
| 56 |        |         |                                                              |
| 57 |        |         |                                                              |
| 58 |        |         |                                                              |
| 59 |        |         |                                                              |
| 60 |        |         |                                                              |

|    |        |         |                                                       |
|----|--------|---------|-------------------------------------------------------|
| 1  |        |         |                                                       |
| 2  |        |         |                                                       |
| 3  |        |         |                                                       |
| 4  | 56252  | ZV22100 | [V]Other normal pregnancy supervision                 |
| 5  | 21196  | ZV23.00 | [V]High-risk pregnancy supervision                    |
| 6  | 30618  | Z22AB00 | Unplanned pregnancy                                   |
| 7  | 10775  | 8B74.00 | Iron supplement in pregnancy                          |
| 8  | 48534  | ZV23100 | [V]Pregnancy with history of trophoblastic disease    |
| 9  | 73559  | L13z000 | Unspecified pregnancy vomiting unspecified            |
| 10 | 13984  | 584E.00 | Antenatal ultrasound confirms ectopic pregnancy       |
| 11 | 9754   | Z22A400 | Early stage of pregnancy                              |
| 12 | 67893  | L2C..00 | Malnutrition in pregnancy                             |
| 13 | 70993  | L16Az00 | Glycosuria during pregnancy NOS                       |
| 14 | 23438  | L2z..00 | Risk factors in pregnancy NOS                         |
| 15 | 105694 | ZVu2300 | [X]Supervision of other normal pregnancy              |
| 16 | 53097  | Z22C313 | Duration of pregnancy                                 |
| 17 | 58156  | L03y.00 | Other ectopic pregnancy                               |
| 18 | 55730  | ZV22.11 | [V]Supervision of normal pregnancy                    |
| 19 | 5709   | 62...13 | Pregnancy care                                        |
| 20 | 100104 | 95B..00 | Health in Pregnancy grant claim form issued           |
| 21 | 72883  | Lyu2100 | [X]Other vomiting complicating pregnancy              |
| 22 | 59588  | L411500 | Genital varices in pregnancy                          |
| 23 | 67863  | Z22B.00 | Observation of quantity of pregnancy                  |
| 24 | 12890  | Z227.00 | Confirmation of pregnancy                             |
| 25 | 47080  | L162.00 | Unspecified renal disease in pregnancy                |
| 26 | 3191   | L16y500 | Abdominal pain in pregnancy                           |
| 27 | 27740  | L16..00 | Other pregnancy complication NEC                      |
| 28 | 67698  | L150000 | Post-term pregnancy unspecified                       |
| 29 | 29623  | 62H4.00 | Rh screen - 2nd preg. sample                          |
| 30 | 21438  | 7E08411 | Vacuum termination of pregnancy                       |
| 31 | 51298  | 6215    | Pregnant - on abdom. palpation                        |
| 32 | 35912  | ZV22200 | [V]Pregnancy confirmed                                |
| 33 | 99980  | L168300 | Fatigue during pregnancy - not delivered              |
| 34 | 29593  | 6223    | Antenatal care: 3rd pregnancy                         |
| 35 | 49407  | L2B..00 | Low weight gain in pregnancy                          |
| 36 | 52583  | L168.00 | Fatigue during pregnancy                              |
| 37 | 69599  | L21y.00 | Other multiple pregnancy                              |
| 38 | 39117  | L126500 | Eclampsia in pregnancy                                |
| 39 | 863    | L398200 | Caesarean section - pregnancy at term                 |
| 40 | 90776  | 62a..11 | Review of pregnancy                                   |
| 41 | 91254  | Z235200 | Rounded pregnant abdomen                              |
| 42 | 109416 | 62H5.00 | Rh screen - 3rd preg. sample                          |
| 43 | 69815  | 62H3.00 | Rh screen - 1st preg. sample                          |
| 44 | 11989  | 8HHV.00 | Referral for termination of pregnancy                 |
| 45 | 37701  | Z22A.00 | Observation of pattern of pregnancy                   |
| 46 | 33441  | L511.00 | Maternal care for viable fetus in abdominal pregnancy |
| 47 | 106957 | 9Nif.00 | Did not attend pertussis vaccination in pregnancy     |
| 48 | 24603  | L10y.00 | Other haemorrhage in early pregnancy                  |
| 49 |        |         |                                                       |
| 50 |        |         |                                                       |
| 51 |        |         |                                                       |
| 52 |        |         |                                                       |
| 53 |        |         |                                                       |
| 54 |        |         |                                                       |
| 55 |        |         |                                                       |
| 56 |        |         |                                                       |
| 57 |        |         |                                                       |
| 58 |        |         |                                                       |
| 59 |        |         |                                                       |
| 60 |        |         |                                                       |

|    |        |         |                                                             |
|----|--------|---------|-------------------------------------------------------------|
| 1  |        |         |                                                             |
| 2  |        |         |                                                             |
| 3  |        |         |                                                             |
| 4  | 47608  | L177.00 | Infections of bladder in pregnancy                          |
| 5  | 63751  | L16A300 | Glycosuria during pregnancy - not delivered                 |
| 6  | 15418  | L166300 | Genitourinary tract infection in pregnancy - not delivered  |
| 7  | 59313  | Z22BA00 | Contin pregnancy after intrauterine death of sibling fetus  |
| 8  | 69722  | ZV23z00 | [V]Unspecified high-risk pregnancy                          |
| 9  | 14842  | 6217    | Pregnant - unplanned - wanted                               |
| 10 | 42614  | Z22..00 | Pregnancy observations                                      |
| 11 | 53490  | L178.00 | Infections of urethra in pregnancy                          |
| 12 | 43344  | ZV61800 | [V]Illegitimate pregnancy                                   |
| 13 | 10173  | Z23D200 | Pregnant abdomen observation                                |
| 14 | 52685  | ZV23000 | [V]Pregnancy with history of infertility                    |
| 15 | 50512  | L031z00 | Tubal pregnancy NOS                                         |
| 16 | 49502  | L228.00 | Multiple pregnancy with malpresentation                     |
| 17 | 50058  | 13SZ.00 | Pregnancy benefit NOS                                       |
| 18 | 69011  | L132000 | Late pregnancy vomiting unspecified                         |
| 19 | 10185  | L13..00 | Excessive pregnancy vomiting                                |
| 20 | 10184  | 67A3.00 | Pregnancy smoking advice                                    |
| 21 | 97349  | L121300 | Renal hypertension in preg/childbirth/puerp - not delivered |
| 22 | 101518 | L132z00 | Late pregnancy vomiting NOS                                 |
| 23 | 71730  | L123300 | Transient hypertension of pregnancy - not delivered         |
| 24 | 31162  | L165.00 | Asymptomatic bacteriuria in pregnancy                       |
| 25 | 52048  | Z22AB11 | Accidental pregnancy                                        |
| 26 | 54938  | L162000 | Unspecified renal disease in pregnancy unspecified          |
| 27 | 62358  | L167000 | Liver disorder in pregnancy unspecified                     |
| 28 | 110888 | 67lt.00 | Advice on risk harm to mother from maternl medictn dur preg |
| 29 | 38771  | Lyu2200 | [X]Other venous complications in pregnancy                  |
| 30 | 15634  | L166z00 | Genitourinary tract infection in pregnancy NOS              |
| 31 | 43000  | L16D.00 | Excessive weight gain in pregnancy                          |
| 32 | 14651  | 13H8.00 | Illegitimate pregnancy                                      |
| 33 | 108236 | 621D.00 | Concealed pregnancy                                         |
| 34 | 15033  | ZV61900 | [V]Other unwanted pregnancy                                 |
| 35 | 67164  | L18z300 | Medical condition NOS in pregnancy - baby not yet delivered |
| 36 | 93303  | ZV22400 | [V]Supervision of other normal pregnancy                    |
| 37 | 6184   | ZV22.00 | [V]Normal pregnancy                                         |
| 38 | 48281  | Z22D200 | Non-viable pregnancy                                        |
| 39 | 29746  | 8B75.00 | Vitamin supplement - pregnancy                              |
| 40 | 16611  | ZV22300 | [V]Pregnant state, incidental                               |
| 41 | 1130   | L210.00 | Twin pregnancy                                              |
| 42 | 52221  | L03y000 | Cervical pregnancy                                          |
| 43 | 59650  | Z235300 | Transversely enlarged pregnant abdomen                      |
| 44 | 69327  | L10yz00 | Other haemorrhage in early pregnancy NOS                    |
| 45 | 51956  | L212200 | Quadruplet pregnancy with antenatal problem                 |
| 46 | 10306  | Z22C314 | Weeks pregnant                                              |
| 47 | 45965  | Z22C311 | Pregnancy duration                                          |
| 48 | 26055  | L263A00 | Maternal care for fetal bradycardia during pregnancy        |
| 49 |        |         |                                                             |
| 50 |        |         |                                                             |
| 51 |        |         |                                                             |
| 52 |        |         |                                                             |
| 53 |        |         |                                                             |
| 54 |        |         |                                                             |
| 55 |        |         |                                                             |
| 56 |        |         |                                                             |
| 57 |        |         |                                                             |
| 58 |        |         |                                                             |
| 59 |        |         |                                                             |
| 60 |        |         |                                                             |

|    |        |         |                                                                |
|----|--------|---------|----------------------------------------------------------------|
| 1  |        |         |                                                                |
| 2  |        |         |                                                                |
| 3  |        |         |                                                                |
| 4  | 61301  | L10y000 | Other haemorrhage in early pregnancy unspecified               |
| 5  | 10261  | L2...00 | Risk factors in pregnancy                                      |
| 6  | 106268 | 8IEc.00 | Pertussis vaccination in pregnancy declined                    |
| 7  | 24944  | L163300 | Pregnancy care of habitual aborter                             |
| 8  | 20118  | 62O..12 | Static weight gain pregnancy                                   |
| 9  | 58142  | L16A000 | Glycosuria during pregnancy unspecified                        |
| 10 | 61835  | L161z00 | Oedema or excessive weight gain in pregnancy NOS               |
| 11 | 23995  | L15..11 | Post-term pregnancy                                            |
| 12 | 35646  | L123z00 | Transient hypertension of pregnancy NOS                        |
| 13 | 93895  | Z22B500 | Quintuplet pregnancy                                           |
| 14 | 65256  | L164.00 | Peripheral neuritis in pregnancy                               |
| 15 | 67975  | L166.00 | Genitourinary tract infections in pregnancy                    |
| 16 | 36006  | L16z.00 | Pregnancy complication NOS                                     |
| 17 | 61466  | Z22A211 | HRP - High risk pregnancy                                      |
| 18 | 26866  | L2y..00 | Other specified risk factors in pregnancy                      |
| 19 | 35855  | L15z.00 | Prolonged pregnancy NOS                                        |
| 20 | 2937   | L175.11 | Rubella contact in pregnancy                                   |
| 21 | 50421  | Z22A900 | Unwanted pregnancy                                             |
| 22 | 37048  | 6282    | A/N care:10yrs+since last preg                                 |
| 23 | 49193  | 67A7.11 | Care of teeth advice -in preg.                                 |
| 24 | 11986  | 7E13300 | Excision of ruptured ectopic tubal pregnancy                   |
| 25 | 97034  | 67AE.00 | Folic acid advice in first trimester of pregnancy              |
| 26 | 106737 | 9mK2.00 | Pertussis vaccination in pregnancy invitation third letter     |
| 27 | 102362 | 389B.00 | Assessment for termination of pregnancy                        |
| 28 | 55618  | ZV23600 | [V]Supervise/pregnancy wth history insufficient antenatal care |
| 29 | 37038  | Z23D100 | Girth of pregnant abdomen                                      |
| 30 | 29631  | 6222    | Antenatal care: 2nd pregnancy                                  |
| 31 | 65555  | L132.00 | Late vomiting of pregnancy                                     |
| 32 | 107698 | Z236300 | Pregnant uterus displaced laterally                            |
| 33 | 4536   | 621..11 | Pregnancy confirmed                                            |
| 34 | 111540 | L415500 | Other phlebitis in pregnancy                                   |
| 35 | 32493  | Z22AD00 | Presentation of pregnancy                                      |
| 36 | 44729  | L031000 | Fallopian tube pregnancy                                       |
| 37 | 43140  | 67A2.00 | Diet in pregnancy advice                                       |
| 38 | 91888  | L181300 | Thyroid dysfunction in pregnancy - baby not yet delivered      |
| 39 | 12837  | 7F2B100 | Ultrasound monitoring of early pregnancy                       |
| 40 | 30351  | 67A6.00 | Drugs in pregnancy advice                                      |
| 41 | 15567  | 6218    | Pregnant -unplanned-not wanted                                 |
| 42 | 33724  | L03z.00 | Ectopic pregnancy NOS                                          |
| 43 | 100892 | Lyu2400 | [X]Other+unspcf genitourinary tract infection in pregnancy     |
| 44 | 127    | 62...00 | Patient pregnant                                               |
| 45 | 13672  | 8HHf.00 | Refer to early pregnancy unit                                  |
| 46 | 32073  | L0...00 | Pregnancy with abortive outcome                                |
| 47 | 64292  | L16y300 | Other pregnancy complication - not delivered                   |
| 48 | 106425 | 62NL.00 | Antenatal 31 week examination                                  |
| 49 |        |         |                                                                |
| 50 |        |         |                                                                |
| 51 |        |         |                                                                |
| 52 |        |         |                                                                |
| 53 |        |         |                                                                |
| 54 |        |         |                                                                |
| 55 |        |         |                                                                |
| 56 |        |         |                                                                |
| 57 |        |         |                                                                |
| 58 |        |         |                                                                |
| 59 |        |         |                                                                |
| 60 |        |         |                                                                |

|    |        |         |                                                              |
|----|--------|---------|--------------------------------------------------------------|
| 1  |        |         |                                                              |
| 2  |        |         |                                                              |
| 3  |        |         |                                                              |
| 4  | 109543 | L332200 | Cord tangled with compression with antenatal problem         |
| 5  | 102300 | Lyu2A00 | [X]Abnormal finding on antenatal screening of mother         |
| 6  | 111263 | L230200 | Disproportion - major pelvic abnormality with antenatal prob |
| 7  | 55111  | 6B22.00 | Sure Start antenatal visit                                   |
| 8  | 13418  | 62W..00 | Antenatal blood tests                                        |
| 9  | 61533  | L270200 | Polyhydramnios with antenatal problem                        |
| 10 | 14085  | 62GB.00 | Antenatal ultrasounds scan at 4-8 weeks                      |
| 11 | 42326  | 62KZ.00 | Antenatal syphilis screen NOS                                |
| 12 | 18536  | 62b..00 | Antenatal HIV screening                                      |
| 13 | 99475  | 68b5.00 | Antenatal screening result pending                           |
| 14 | 13168  | 62NZ.00 | Antenatal examination NOS                                    |
| 15 | 63448  | Z675.00 | Antenatal class                                              |
| 16 | 100596 | 68b3.00 | Antenatal screening shows significant disorder               |
| 17 | 67926  | ZV28z00 | [V]Unspecified antenatal screening                           |
| 18 | 16613  | 584C.00 | Antenatal ultrasound result received                         |
| 19 | 23667  | L413.00 | Antenatal deep vein thrombosis                               |
| 20 | 53683  | L452300 | Obstetric nonpurulent mastitis with antenatal complication   |
| 21 | 104764 | L236200 | Hydrocephalic disproportion with antenatal problem           |
| 22 | 56967  | 9NV1.00 | Antenatal clinic                                             |
| 23 | 13417  | 62K..00 | Antenatal syphilis screen                                    |
| 24 | 108099 | L39z300 | Complications of labour and delivery NOS with antenatal prob |
| 25 | 70096  | L224200 | Transverse lie with antenatal problem                        |
| 26 | 104359 | ZVu2600 | [X]Other antenatal screening based on amniocentesis          |
| 27 | 294    | 62...11 | Antenatal care                                               |
| 28 | 104178 | Lyu2600 | [X]Other abnormal findings on antenatal screening of mother  |
| 29 | 27056  | 62GD.00 | Antenatal ultrasound scan at 17-22 weeks                     |
| 30 | 98481  | 68b4.00 | Repeat antenatal screening required                          |
| 31 | 14084  | 62GC.00 | Antenatal ultrasound scan at 9-16 weeks                      |
| 32 | 28732  | 62c..00 | Antenatal screening                                          |
| 33 | 6095   | 9N1N.00 | Seen in antenatal clinic                                     |
| 34 | 99849  | 68bA.00 | Antenatal screening, at risk couple identified               |
| 35 | 21957  | 62I..11 | AFP test - antenatal                                         |
| 36 | 73765  | L311200 | Secondary uterine inertia with antenatal problem             |
| 37 | 102246 | L265200 | Small-for-dates with antenatal problem                       |
| 38 | 73191  | L226200 | Brow presentation with antenatal problem                     |
| 39 | 69254  | L264200 | Intrauterine death with antenatal problem                    |
| 40 | 104766 | L30z200 | Obstructed labour NOS with antenatal problem                 |
| 41 | 109071 | 38B6.00 | Antenatal risk assessment                                    |
| 42 | 7845   | Z212.00 | Antenatal care                                               |
| 43 | 30378  | L244312 | Rectocele complicating antenatal care - baby not delivered   |
| 44 | 101938 | L390300 | Maternal distress with antenatal problem                     |
| 45 | 90277  | L350200 | Rupture of uterus before labour with antenatal problem       |
| 46 | 97259  | 68b6.00 | Antenatal screening declined                                 |
| 47 | 111183 | 8IHD.00 | Health visitor antenatal visit declined                      |
| 48 | 106588 | 62NJ.00 | Antenatal 22 week examination                                |
| 49 |        |         |                                                              |
| 50 |        |         |                                                              |
| 51 |        |         |                                                              |
| 52 |        |         |                                                              |
| 53 |        |         |                                                              |
| 54 |        |         |                                                              |
| 55 |        |         |                                                              |
| 56 |        |         |                                                              |
| 57 |        |         |                                                              |
| 58 |        |         |                                                              |
| 59 |        |         |                                                              |
| 60 |        |         |                                                              |

|    |        |         |                                                              |
|----|--------|---------|--------------------------------------------------------------|
| 1  |        |         |                                                              |
| 2  |        |         |                                                              |
| 3  |        |         |                                                              |
| 4  |        |         |                                                              |
| 5  |        |         |                                                              |
| 6  |        |         |                                                              |
| 7  |        |         |                                                              |
| 8  |        |         |                                                              |
| 9  |        |         |                                                              |
| 10 |        |         |                                                              |
| 11 |        |         |                                                              |
| 12 |        |         |                                                              |
| 13 |        |         |                                                              |
| 14 |        |         |                                                              |
| 15 |        |         |                                                              |
| 16 |        |         |                                                              |
| 17 |        |         |                                                              |
| 18 |        |         |                                                              |
| 19 |        |         |                                                              |
| 20 |        |         |                                                              |
| 21 |        |         |                                                              |
| 22 |        |         |                                                              |
| 23 |        |         |                                                              |
| 24 |        |         |                                                              |
| 25 |        |         |                                                              |
| 26 |        |         |                                                              |
| 27 |        |         |                                                              |
| 28 |        |         |                                                              |
| 29 |        |         |                                                              |
| 30 |        |         |                                                              |
| 31 |        |         |                                                              |
| 32 |        |         |                                                              |
| 33 |        |         |                                                              |
| 34 |        |         |                                                              |
| 35 |        |         |                                                              |
| 36 |        |         |                                                              |
| 37 |        |         |                                                              |
| 38 |        |         |                                                              |
| 39 |        |         |                                                              |
| 40 |        |         |                                                              |
| 41 |        |         |                                                              |
| 42 |        |         |                                                              |
| 43 |        |         |                                                              |
| 44 |        |         |                                                              |
| 45 |        |         |                                                              |
| 46 |        |         |                                                              |
| 47 |        |         |                                                              |
| 48 |        |         |                                                              |
| 49 |        |         |                                                              |
| 50 |        |         |                                                              |
| 51 |        |         |                                                              |
| 52 |        |         |                                                              |
| 53 |        |         |                                                              |
| 54 |        |         |                                                              |
| 55 |        |         |                                                              |
| 56 |        |         |                                                              |
| 57 |        |         |                                                              |
| 58 |        |         |                                                              |
| 59 |        |         |                                                              |
| 60 |        |         |                                                              |
|    | 30801  | 62OZ.00 | Misc. antenatal data NOS                                     |
|    | 49665  | ZV28600 | [V]Antenatal screening for chromosomal anomalies             |
|    | 21543  | 622..00 | Antenatal care: gravida No.                                  |
|    | 109313 | 9Nil.00 | Did not attend antenatal appointment                         |
|    | 102755 | 8CEM.00 | Downs syndrome antenatal screening information leaflet given |
|    | 37985  | L2AX.00 | Abnormal finding on antenatal screening of mother            |
|    | 91272  | L440300 | Puerperal cerebrovascular disorder with antenatal comp       |
|    | 99286  | L28y200 | Other amniotic/membrane problem with antenatal problem       |
|    | 99479  | L267200 | Other placental conditions with antenatal problem            |
|    | 10056  | 62N..00 | Antenatal examinations                                       |
|    | 44401  | L305200 | Shoulder dystocia with antenatal problem                     |
|    | 35484  | 679E.00 | Antenatal education                                          |
|    | 103512 | L330200 | Prolapse of cord with antenatal problem                      |
|    | 99939  | L33y200 | Other umbilical cord complications with antenatal problem    |
|    | 101354 | L244311 | Cystocele complicating antenatal care - baby not delivered   |
|    | 39611  | 62GE.00 | Antenatal ultrasound scan at 22-40 weeks                     |
|    | 40597  | ZV28y00 | [V]Other specified antenatal screening                       |
|    | 70046  | L2A4.00 | Abnormal radiological finding on antenatal screen of mother  |
|    | 105047 | L2A2.00 | Abnormal cytological finding on antenatal screen of mother   |
|    | 96678  | L33z200 | Umbilical cord complications NOS with antenatal problem      |
|    | 15685  | L2A..00 | Abnormal findings on antenatal screening of mother           |
|    | 2029   | 62G..00 | Antenatal ultrasound scan                                    |
|    | 103787 | 1514100 | Estimated date of delivery by antenatal ultrasound scan      |
|    | 31570  | 6224    | Antenatal care: multip                                       |
|    | 97391  | L281200 | Premature rupture of membranes with antenatal problem        |
|    | 65725  | L413000 | Antenatal deep vein thrombosis unspecified                   |
|    | 13819  | 62F..00 | Antenatal amniocentesis                                      |
|    | 107186 | L266200 | Large-for-dates with antenatal problem                       |
|    | 16750  | 6221    | Antenatal care: primigravida                                 |
|    | 71851  | L229200 | Prolapsed arm with antenatal problem                         |
|    | 105865 | 67AJ.00 | Provision of information about antenatal screening           |
|    | 109043 | 9NFV.00 | Health visitor antenatal visit                               |
|    | 47928  | L280200 | Oligohydramnios with antenatal problem                       |
|    | 6298   | ZV28.00 | [V]Antenatal screening                                       |
|    | 45032  | 62O..00 | Misc. antenatal data                                         |
|    | 66496  | L222200 | Breech presentation with antenatal problem                   |
|    | 444    | 8HT9.00 | Referral to antenatal clinic                                 |
|    | 14083  | 62GZ.00 | Antenatal ultrasound scan NOS                                |
|    | 13419  | 62L..00 | Antenatal blood group screen                                 |
|    | 42120  | L2A0.00 | Abnormal haematologic find on antenatal screening of mother  |
|    | 13416  | 62M..00 | Antenatal sickle cell screen                                 |
|    | 69788  | L260200 | Fetal-maternal haemorrhage with antenatal problem            |
|    | 73734  | ZVu2900 | [X]Other antenatal screening                                 |
|    | 95107  | L312200 | Other uterine inertia with antenatal problem                 |
|    | 103677 | Eu32B00 | [X]Antenatal depression                                      |

|    |        |         |                                                              |
|----|--------|---------|--------------------------------------------------------------|
| 1  |        |         |                                                              |
| 2  |        |         |                                                              |
| 3  | 106923 | 62NK.00 | Antenatal 25 week examination                                |
| 4  | 108811 | L245300 | Cervical incompetence with antenatal problem                 |
| 5  | 73407  | L261200 | Rhesus isoimmunisation with antenatal problem                |
| 6  | 101980 | 65QG.00 | Antenatal screening shows non sig haemoglobinopathy carrier  |
| 7  | 44828  | L263200 | Fetal distress with antenatal problem                        |
| 8  | 45091  | 62Y..00 | Routine antenatal care                                       |
| 9  | 71862  | L323200 | Delayed delivery second twin with antenatal problem          |
| 10 | 71794  | L307200 | Other failed trial of labour with antenatal problem          |
| 11 | 51432  | 62FZ.00 | Antenatal amniocentesis NOS                                  |
| 12 | 97523  | 68b..00 | Antenatal screening status                                   |
| 13 | 28290  | L2A3.00 | Abnormal ultrasonic finding on antenatal screening of mother |
| 14 | 36226  | L2A1.00 | Abnormal biochemical finding on antenatal screen of mother   |
| 15 | 100502 | L413200 | Antenatal deep vein thrombosis with antenatal complication   |
| 16 | 61203  | L413z00 | Antenatal deep vein thrombosis NOS                           |
| 17 | 100578 | L255200 | Fetus with drug damage with antenatal problem                |
| 18 | 69072  | L262200 | Other blood-group isoimmunisation with antenatal problem     |
| 19 | 49617  | 622Z.00 | Antenatal care: gravida NOS                                  |
| 20 | 26873  | L413.11 | DVT - deep venous thrombosis, antenatal                      |
| 21 | 33009  | 6254    | A/N care: H/O child abuse                                    |
| 22 | 29610  | 62NB.00 | A/N 36 week examination                                      |
| 23 | 61162  | L250200 | Fetus with central nervous system malformation + a/n problem |
| 24 | 52044  | 6252    | A/N care: poor A/N attender                                  |
| 25 | 35513  | 6284    | A/N care: primip. > 30 years                                 |
| 26 | 26695  | 625Z.00 | A/N care: social risk NOS                                    |
| 27 | 55605  | 62NH.00 | A/N 42 week examination                                      |
| 28 | 30797  | 6233    | A/N care: grand multip                                       |
| 29 | 23013  | 6231    | A/N care: uncertain dates                                    |
| 30 | 36516  | 62F4.00 | A/N amniocentesis wanted                                     |
| 31 | 37046  | 628Z.00 | A/N risk NOS                                                 |
| 32 | 107506 | 62H2.00 | A/N Rh screen offered                                        |
| 33 | 25331  | 62O6.11 | Vaginal 'show' - A/N                                         |
| 34 | 64537  | 62GA.00 | A/N U/S scan for slow growth                                 |
| 35 | 13821  | 62F6.00 | A/N amniocentesis - normal                                   |
| 36 | 19772  | 62F3.00 | A/N amniocentesis - not wanted                               |
| 37 | 70840  | L240311 | Bicornuate uterus complicating a/n care, baby not delivered  |
| 38 | 33287  | 62F1.00 | A/N amniocentesis -not offered                               |
| 39 | 13171  | 62N8.00 | A/N 32 week examination                                      |
| 40 | 52049  | 62G3.00 | A/N U/S scan not wanted                                      |
| 41 | 33008  | 6285    | A/N care: multip. > 35 years                                 |
| 42 | 26696  | 6253    | A/N care: late booker                                        |
| 43 | 24219  | 62A..00 | A/N care provider                                            |
| 44 | 13308  | 625..00 | A/N care: social risk                                        |
| 45 | 26692  | 6236    | A/N care: poor obstetr history                               |
| 46 | 37222  | 62G1.00 | A/N U/S scan not offered                                     |
| 47 | 25391  | 62I..12 | Alpha-feto protein test - A/N                                |
| 48 |        |         |                                                              |
| 49 |        |         |                                                              |
| 50 |        |         |                                                              |
| 51 |        |         |                                                              |
| 52 |        |         |                                                              |
| 53 |        |         |                                                              |
| 54 |        |         |                                                              |
| 55 |        |         |                                                              |
| 56 |        |         |                                                              |
| 57 |        |         |                                                              |
| 58 |        |         |                                                              |
| 59 |        |         |                                                              |
| 60 |        |         |                                                              |

|    |        |         |                                                              |
|----|--------|---------|--------------------------------------------------------------|
| 1  |        |         |                                                              |
| 2  |        |         |                                                              |
| 3  |        |         |                                                              |
| 4  | 35512  | 6281    | A/N care: under 5ft tall                                     |
| 5  | 31251  | 627..00 | A/N care: gynae. risk                                        |
| 6  | 26551  | 62NE.00 | A/N 39 week examination                                      |
| 7  | 68089  | 62HZ.00 | A/N Rh antibody screen NOS                                   |
| 8  | 26691  | 6235    | A/N care: H/O perinatal death                                |
| 9  | 35826  | 62G6.00 | A/N U/S scan normal += dates                                 |
| 10 | 30885  | 62G4.00 | A/N U/S scan wanted                                          |
| 11 | 70289  | 62F9.00 | A/N amnio. for ? neural tube                                 |
| 12 | 26693  | 626..00 | A/N care: medical risk                                       |
| 13 | 73099  | L246311 | Polyp of cervix complicating a/n care- baby not delivered    |
| 14 | 20401  | L241311 | Uterine fibroid complicating a/n care, baby not delivered    |
| 15 | 65450  | 62F2.00 | A/N amniocentesis - offered                                  |
| 16 | 24236  | 62AZ.00 | A/N care provider NOS                                        |
| 17 | 26553  | 62ND.00 | A/N 38 week examination                                      |
| 18 | 102160 | L283200 | Prolonged artificial rupture of membranes with a/n problem   |
| 19 | 64141  | 62K2.00 | A/N syphilis screen-blood sent                               |
| 20 | 26550  | 62A2.00 | A/N care from consultant                                     |
| 21 | 89025  | L237200 | Other fetal abnormality causing disproportion with a/n prob  |
| 22 | 102099 | 62MZ.00 | A/N sickle cell screen NOS                                   |
| 23 | 47415  | 62G5.00 | A/N U/S scan awaited                                         |
| 24 | 13415  | 62A4.00 | A/N care midwifery led                                       |
| 25 | 54734  | L28z200 | Amniotic cavity and membrane problem NOS with a/n problem    |
| 26 | 14086  | 62G8.00 | A/N U/S scan abnormal                                        |
| 27 | 37221  | 62G7.00 | A/N U/S scan normal +? dates                                 |
| 28 | 66608  | L241300 | Tumour of uterine body complicating a/n care, baby not deliv |
| 29 | 71797  | L248300 | Vulval abn complicating a/n care - baby not yet delivered    |
| 30 | 37029  | 62NG.00 | A/N 41 week examination                                      |
| 31 | 29727  | 62NA.00 | A/N 35 week examination                                      |
| 32 | 108885 | 62L1.00 | A/N blood gp screen not done                                 |
| 33 | 39172  | 62L2.00 | A/N blood group screen done                                  |
| 34 | 38165  | 6237    | A/N care: H/O trophoblast.dis.                               |
| 35 | 35511  | 6234    | A/N care: H/O stillbirth                                     |
| 36 | 26875  | 6232    | A/N care: recurrent aborter                                  |
| 37 | 9546   | 623..00 | A/N care: obstetric risk                                     |
| 38 | 73120  | L247300 | Vaginal abnormality complicating a/n care-baby not delivered |
| 39 | 24214  | 62A1.00 | A/N care from G.P.                                           |
| 40 | 13169  | 62N5.00 | A/N 24 week examination                                      |
| 41 | 29627  | 62N7.00 | A/N 30 week examination                                      |
| 42 | 3517   | 62N1.00 | A/N booking examination                                      |
| 43 | 62147  | 62F8.00 | A/N amnio. for ? chrom.abnorm.                               |
| 44 | 37047  | 6242    | A/N care: H/O infertility                                    |
| 45 | 27057  | 62G9.00 | A/N U/S scan for ? abnormality                               |
| 46 | 70616  | 62M2.00 | A/N sickle cell screen done                                  |
| 47 | 29059  | 62A3.00 | A/N - shared care                                            |
| 48 | 108867 | 62M1.00 | A/N sickle screen not done                                   |
| 49 |        |         |                                                              |
| 50 |        |         |                                                              |
| 51 |        |         |                                                              |
| 52 |        |         |                                                              |
| 53 |        |         |                                                              |
| 54 |        |         |                                                              |
| 55 |        |         |                                                              |
| 56 |        |         |                                                              |
| 57 |        |         |                                                              |
| 58 |        |         |                                                              |
| 59 |        |         |                                                              |
| 60 |        |         |                                                              |



|    |        |         |                                                              |
|----|--------|---------|--------------------------------------------------------------|
| 1  |        |         |                                                              |
| 2  |        |         |                                                              |
| 3  | 12260  | 62H..00 | A/N Rh antibody screen                                       |
| 4  | 41955  | 62F5.00 | A/N amniocentesis - awaited                                  |
| 5  | 13166  | 62N3.00 | A/N 16 week examination                                      |
| 6  | 35510  | 6241    | A/N care: elderly primip.                                    |
| 7  |        |         |                                                              |
| 8  | 26552  | 62NC.00 | A/N 37 week examination                                      |
| 9  | 29280  | 62NF.00 | A/N 40 week examination                                      |
| 10 |        |         |                                                              |
| 11 | 3786   | 628..00 | A/N care: risk NOS                                           |
| 12 | 39728  | 62O..11 | Fetal maturity - A/N                                         |
| 13 | 13822  | 62F7.00 | A/N amniocentesis - abnormal                                 |
| 14 | 71912  | 62H1.00 | A/N Rh screen not offered                                    |
| 15 | 26694  | 6251    | A/N care: poor home conditions                               |
| 16 |        |         |                                                              |
| 17 | 70186  | 62LZ.00 | A/N blood group screen NOS                                   |
| 18 | 26690  | 623Z.00 | A/N care: obstetric risk NOS                                 |
| 19 | 98957  | L240300 | Cong abnorm uterus complicating a/n care, baby not delivered |
| 20 | 13170  | 62N9.00 | A/N 34 week examination                                      |
| 21 | 109166 | 62K1.00 | A/N syphilis screen not done                                 |
| 22 |        |         |                                                              |
| 23 | 13167  | 62N2.00 | A/N 12 weeks examination                                     |
| 24 | 37220  | 62G2.00 | A/N U/S scan offered                                         |
| 25 |        |         |                                                              |
| 26 | 29364  | 62N4.00 | A/N 20 week examination                                      |
| 27 | 26554  | 62N6.00 | A/N 28 week examination                                      |
| 28 |        |         |                                                              |
| 29 | 31250  | 6283    | A/N care: primip. < 17 years                                 |
| 30 | 30209  | ZV27000 | [V]Single live birth                                         |
| 31 | 20573  | Q48D000 | [X]Fresh stillbirth                                          |
| 32 |        |         |                                                              |
| 33 | 11966  | ZV27.11 | [V]Live birth                                                |
| 34 | 8906   | ZV27.12 | [V]Stillbirth                                                |
| 35 |        |         |                                                              |
| 36 | 41253  | 7F...11 | Childbirth operations                                        |
| 37 | 10719  | 6331    | Single live birth                                            |
| 38 | 28726  | 7F19100 | Water birth delivery                                         |
| 39 | 58978  | Q20y.00 | Other specified birth trauma                                 |
| 40 | 37884  | Z254D00 | Face to pubes birth                                          |
| 41 | 72025  | ZV3zz00 | [V]Unspecified birth, NOS                                    |
| 42 | 8776   | Q48D.00 | [X] Stillbirth                                               |
| 43 |        |         |                                                              |
| 44 | 5253   | 633a.00 | Birth of child                                               |
| 45 | 31203  | 6332    | Single stillbirth                                            |
| 46 | 13287  | 633..11 | Livebirth                                                    |
| 47 | 17354  | 633..13 | Triplet birth                                                |
| 48 | 1825   | 633..14 | Twin birth                                                   |
| 49 |        |         |                                                              |
| 50 | 1214   | 6311    | Home birth                                                   |
| 51 | 2353   | 63E2.00 | Normal birth                                                 |
| 52 | 974    | Q4z..15 | Stillbirth NEC                                               |
| 53 | 110211 | 633C.00 | Intrapartum stillbirth                                       |
| 54 | 70813  | ZV27500 | [V]Other multiple birth, all live born                       |
| 55 | 37878  | Z254E11 | Multiple birth delivery                                      |
| 56 | 42324  | L34z.00 | Vulval/perineal trauma during delivery NOS                   |
| 57 |        |         |                                                              |
| 58 | 55124  | L39yz00 | Other complications of labour and delivery NOS               |
| 59 |        |         |                                                              |
| 60 |        |         |                                                              |

|    |        |         |                                                              |
|----|--------|---------|--------------------------------------------------------------|
| 1  |        |         |                                                              |
| 2  |        |         |                                                              |
| 3  |        |         |                                                              |
| 4  | 27351  | Q036.00 | Fetus or neonate affected by precipitate delivery            |
| 5  | 43918  | L340400 | Fourchette tear during delivery                              |
| 6  | 33915  | L213.00 | Multiple delivery                                            |
| 7  | 5213   | 7F16400 | Low forceps cephalic delivery                                |
| 8  |        |         |                                                              |
| 9  | 25223  | L396.00 | Vacuum extractor delivery                                    |
| 10 | 57957  | 7F1Ay00 | Other specified other method of delivery                     |
| 11 | 7670   | L398z00 | Caesarean delivery NOS                                       |
| 12 | 24243  | L263400 | Labour and delivery complic by meconium in amniotic fluid    |
| 13 | 15828  | 14Y4.00 | Born by breech delivery                                      |
| 14 | 69780  | Lyu5100 | [X]Other and unspecified forceps delivery                    |
| 15 | 62862  | L342200 | Third degree perineal tear during delivery with p/n problem  |
| 16 | 68752  | Z253300 | Normal rate of delivery                                      |
| 17 | 33773  | 7F19y00 | Other specified normal delivery                              |
| 18 |        |         |                                                              |
| 19 | 30775  | 62B8.00 | Midwife unit delivery booking                                |
| 20 | 6452   | L395.00 | Forceps delivery                                             |
| 21 | 239    | L20..11 | Spontaneous vaginal delivery                                 |
| 22 |        |         |                                                              |
| 23 | 95858  | L34y100 | Other vulval/perineal trauma during delivery- delivered      |
| 24 | 29070  | 7F15000 | Spontaneous breech delivery                                  |
| 25 |        |         |                                                              |
| 26 | 19605  | L341z00 | Second degree perineal tear during delivery NOS              |
| 27 | 57945  | 7F17200 | Vacuum delivery before full dilation of cervix               |
| 28 | 72022  | L343000 | Fourth degree perineal tear during delivery, unspecified     |
| 29 | 19607  | L344000 | Unspecified perineal laceration during delivery, unspecified |
| 30 |        |         |                                                              |
| 31 | 3365   | L142.11 | Premature delivery                                           |
| 32 |        |         |                                                              |
| 33 | 27914  | 62V..00 | Delivery place planned                                       |
| 34 | 90885  | Lyu4900 | [X]Labour+delivery complicated by other cord entanglement    |
| 35 |        |         |                                                              |
| 36 | 56310  | Z25..00 | Delivery observations                                        |
| 37 | 12052  | Z257.00 | Delivery normal                                              |
| 38 | 11532  | 7F14.00 | Breech extraction delivery                                   |
| 39 | 13164  | 62BZ.00 | Delivery booking - place NOS                                 |
| 40 | 61212  | L34y.00 | Other vulval and perineal trauma during delivery             |
| 41 | 61077  | 7F16200 | Mid forceps cephalic delivery with rotation                  |
| 42 | 5866   | 7F1..00 | Induction and delivery operations                            |
| 43 |        |         |                                                              |
| 44 | 65940  | 7F16500 | Trial of forceps delivery                                    |
| 45 | 19608  | L340z00 | First degree perineal tear during delivery NOS               |
| 46 | 52875  | L398000 | Caesarean delivery unspecified                               |
| 47 | 83535  | Lyu5000 | [X]Other single spontaneous delivery                         |
| 48 | 47625  | Z22C200 | Estimated date of delivery from last normal period           |
| 49 |        |         |                                                              |
| 50 | 17744  | 7F13100 | Lower uterine segment caesarean delivery NEC                 |
| 51 | 15073  | 7F13y00 | Other specified other caesarean delivery                     |
| 52 |        |         |                                                              |
| 53 | 9800   | L398300 | Delivery by elective caesarean section                       |
| 54 | 37699  | L396z00 | Vacuum extractor delivery NOS                                |
| 55 | 72021  | L343100 | Fourth degree perineal tear during delivery - delivered      |
| 56 |        |         |                                                              |
| 57 | 107136 | Q031.11 | Fetus affected by malpresentation during delivery            |
| 58 | 17684  | L395.11 | Keilland's forceps delivery                                  |
| 59 |        |         |                                                              |
| 60 | 20425  | L395.12 | Neville - Barnes forceps delivery                            |

|    |        |         |                                                             |
|----|--------|---------|-------------------------------------------------------------|
| 1  |        |         |                                                             |
| 2  |        |         |                                                             |
| 3  |        |         |                                                             |
| 4  | 4780   | L20..00 | Normal delivery in a completely normal case                 |
| 5  | 5868   | Ly0..00 | Spontaneous vertex delivery                                 |
| 6  | 106113 | Lyu5800 | [X]Multiple delivery, unspecified                           |
| 7  | 62406  | L323000 | Delayed delivery second twin unspecified                    |
| 8  | 61540  | Z212100 | Delivery place planned                                      |
| 9  | 47157  | L34zz00 | Vulval/perineal trauma during delivery NOS                  |
| 10 | 58176  | 62C2.00 | Full stay delivery booking                                  |
| 11 | 32283  | Z212200 | Home delivery planned                                       |
| 12 | 106808 | L34z200 | Vulval/perineal trauma during delivery NOS with p/n problem |
| 13 | 740    | 7F12.00 | Elective caesarean delivery                                 |
| 14 | 111579 | Z263300 | Condition of membranes at delivery                          |
| 15 | 34102  | Z262700 | Incomplete placenta at delivery                             |
| 16 | 21554  | 7F16900 | Kielland forceps cephalic delivery with rotation            |
| 17 | 31254  | L340100 | First degree perineal tear during delivery - delivered      |
| 18 | 23394  | 7F16300 | Mid forceps cephalic delivery NEC                           |
| 19 | 54591  | 7F14z00 | Breech extraction delivery NOS                              |
| 20 | 3085   | 7F12z00 | Elective caesarean delivery NOS                             |
| 21 | 22491  | Ly1..00 | Spontaneous breech delivery                                 |
| 22 | 19609  | L340600 | Vaginal tear during delivery                                |
| 23 | 39168  | L342100 | Third degree perineal tear during delivery - delivered      |
| 24 | 44235  | L296.00 | Vaginal delivery following previous caesarean section       |
| 25 | 40706  | L344z00 | Unspecified perineal laceration during delivery NOS         |
| 26 | 27993  | 62V0.00 | Home delivery planned                                       |
| 27 | 58721  | L20z.00 | Normal delivery in completely normal case NOS               |
| 28 | 33477  | L398100 | Caesarean delivery - delivered                              |
| 29 | 27963  | L323.00 | Delayed delivery of second twin, triplet etc                |
| 30 | 37509  | 7F1A300 | Drainage of hydrocephalus of fetus to facilitate delivery   |
| 31 | 30806  | L34yz00 | Other vulval/perineal trauma during delivery NOS            |
| 32 | 30373  | Z22C100 | Estimated date of delivery from last period                 |
| 33 | 42572  | L323100 | Delayed delivery second twin - delivered                    |
| 34 | 15514  | 7F13000 | Upper uterine segment caesarean delivery NEC                |
| 35 | 47546  | 7F12y00 | Other specified elective caesarean delivery                 |
| 36 | 86399  | 7F17y00 | Other specified vacuum delivery                             |
| 37 | 13352  | L34..00 | Trauma to perineum and vulva during delivery                |
| 38 | 49446  | L396100 | Vacuum extractor delivery - delivered                       |
| 39 | 15256  | L344.00 | Unspecified perineal laceration during delivery             |
| 40 | 37054  | L341100 | Second degree perineal tear during delivery - delivered     |
| 41 | 3108   | 7F1B000 | Episiotomy to facilitate delivery                           |
| 42 | 47863  | Lyu5200 | [X]Other single delivery by caesarean section               |
| 43 | 9160   | Z257100 | Spontaneous vertex delivery                                 |
| 44 | 58844  | L396000 | Vacuum extractor delivery unspecified                       |
| 45 | 57488  | L34z100 | Vulval/perineal trauma during delivery NOS - delivered      |
| 46 | 27731  | L345.12 | Vulval and perineal haematoma during delivery               |
| 47 | 104872 | L143100 | Premature labour with premature delivery                    |
| 48 | 42275  | L395300 | Mid-cavity forceps delivery                                 |
| 49 |        |         |                                                             |
| 50 |        |         |                                                             |
| 51 |        |         |                                                             |
| 52 |        |         |                                                             |
| 53 |        |         |                                                             |
| 54 |        |         |                                                             |
| 55 |        |         |                                                             |
| 56 |        |         |                                                             |
| 57 |        |         |                                                             |
| 58 |        |         |                                                             |
| 59 |        |         |                                                             |
| 60 |        |         |                                                             |

|    |       |         |                                                              |
|----|-------|---------|--------------------------------------------------------------|
| 1  |       |         |                                                              |
| 2  |       |         |                                                              |
| 3  |       |         |                                                              |
| 4  | 40876 | L342z00 | Third degree perineal tear during delivery NOS               |
| 5  | 93273 | L39z100 | Complications of labour and delivery NOS - delivered         |
| 6  | 42755 | L387.00 | Spinal/epidural ansth-induced headache dur labour/delivery   |
| 7  | 57789 | L395400 | Delivery by combination of forceps and vacuum extractor      |
| 8  |       |         |                                                              |
| 9  | 19603 | L340000 | First degree perineal tear during delivery, unspecified      |
| 10 | 4786  | L213200 | Multiple delivery, all by caesarean section                  |
| 11 | 20002 | 7F16000 | High forceps cephalic delivery with rotation                 |
| 12 | 66501 | L39zz00 | Complications of labour and delivery NOS                     |
| 13 | 34333 | Z262711 | Incomplete delivery of placenta                              |
| 14 | 19602 | L341000 | Second degree perineal tear during delivery, unspecified     |
| 15 | 39866 | 7F1A200 | Cleidotomy of fetus to facilitate delivery                   |
| 16 |       |         |                                                              |
| 17 | 30805 | L34y000 | Other vulval/perineal trauma during delivery, unspecified    |
| 18 | 11530 | Z254900 | Vaginal delivery                                             |
| 19 |       |         |                                                              |
| 20 | 67489 | L34z000 | Vulval/perineal trauma during delivery NOS unspec            |
| 21 | 4638  | 7F13.00 | Other caesarean delivery                                     |
| 22 | 40744 | Z254A00 | Abnormal delivery                                            |
| 23 |       |         |                                                              |
| 24 | 25157 | L142100 | Early onset of delivery - delivered                          |
| 25 | 17704 | L395.13 | Simpson's forceps delivery                                   |
| 26 |       |         |                                                              |
| 27 | 39573 | Z265900 | Umbilical cord not around baby's neck at delivery            |
| 28 | 5033  | 7F16100 | High forceps cephalic delivery NEC                           |
| 29 | 26549 | 62B1.00 | Delivery: no place booked                                    |
| 30 | 50293 | 7F1z.00 | Induction and delivery operations NOS                        |
| 31 |       |         |                                                              |
| 32 | 67862 | L39..00 | Other complications of labour and delivery NEC               |
| 33 | 63277 | L393.00 | Acute renal failure following labour and delivery            |
| 34 | 32380 | L34..12 | Vulval delivery trauma                                       |
| 35 |       |         |                                                              |
| 36 | 23866 | 7F1B100 | Symphysiotomy to facilitate delivery                         |
| 37 | 618   | L398400 | Delivery by emergency caesarean section                      |
| 38 | 66315 | Lyu5500 | [X]Other specified assisted single delivery                  |
| 39 | 23791 | L38A.00 | Failed or difficult intubation during labour and delivery    |
| 40 | 99608 | 7F1Bz00 | Other operation to facilitate delivery NOS                   |
| 41 |       |         |                                                              |
| 42 | 98749 | 7F1B400 | Incision of cervix to facilitate delivery                    |
| 43 | 30274 | L395200 | Low forceps delivery                                         |
| 44 |       |         |                                                              |
| 45 | 35190 | 7F13z00 | Other caesarean delivery NOS                                 |
| 46 | 40710 | L395z00 | Forceps delivery NOS                                         |
| 47 | 26712 | L340300 | Labial tear during delivery                                  |
| 48 | 62789 | Q031.00 | Fetus/neonate affected by malposition/disproportion-delivery |
| 49 | 2624  | Q033.00 | Fetus or neonate affected by vacuum extraction delivery      |
| 50 |       |         |                                                              |
| 51 | 19599 | L340.00 | First degree perineal tear during delivery                   |
| 52 | 11650 | L342.00 | Third degree perineal tear during delivery                   |
| 53 |       |         |                                                              |
| 54 | 51736 | 7F17100 | Low vacuum delivery                                          |
| 55 | 36703 | L345.00 | Vulval and perineal haematoma during delivery                |
| 56 | 2458  | 7F17.00 | Vacuum delivery                                              |
| 57 |       |         |                                                              |
| 58 | 22975 | 62B3.00 | G.P. unit delivery booking                                   |
| 59 | 32988 | 62B5.00 | Private home delivery booking                                |
| 60 | 49485 | L263600 | Labour+delivery complicatd by biochem evidence/fetal stress  |

|    |        |         |                                                             |
|----|--------|---------|-------------------------------------------------------------|
| 1  |        |         |                                                             |
| 2  |        |         |                                                             |
| 3  |        |         |                                                             |
| 4  | 5522   | L3z..00 | Complications of labour and delivery NOS                    |
| 5  | 103319 | Lyu4.00 | [X]Complications of labour and delivery                     |
| 6  | 14789  | Q030.11 | Fetus affected by breech delivery                           |
| 7  | 34411  | Z254300 | Delivered by mid-cavity forceps delivery                    |
| 8  | 48230  | Z254800 | Deliveries by spontaneous breech delivery                   |
| 9  | 36137  | L142z00 | Early onset of delivery NOS                                 |
| 10 | 59941  | L142000 | Early onset of delivery unspecified                         |
| 11 | 20738  | 7F19000 | Manually assisted vaginal delivery                          |
| 12 | 34628  | 7F16600 | Failed forceps delivery                                     |
| 13 | 33480  | 7F16y00 | Other specified forceps cephalic delivery                   |
| 14 | 37245  | L345000 | Vulval and perineal haematoma during delivery, unspecified  |
| 15 | 43959  | 633Z.00 | Outcome of delivery NOS                                     |
| 16 | 70615  | L345z00 | Vulval and perineal haematoma during delivery NOS           |
| 17 | 60953  | Z253211 | Precipitate delivery                                        |
| 18 | 53572  | L3y..00 | Other specified complications of labour or delivery         |
| 19 | 9668   | 7F12100 | Elective lower uterine segment caesarean delivery           |
| 20 | 9791   | Z257.15 | ND - Normal delivery                                        |
| 21 | 9625   | L263300 | Labour and delivery complicated by fetal heart rate anomaly |
| 22 | 28861  | L398500 | Delivery by caesarean hysterectomy                          |
| 23 | 49733  | L388.00 | Cardiac comps of anaesthesia during labour and delivery     |
| 24 | 15480  | 14Y3.00 | Born by normal vaginal delivery                             |
| 25 | 98059  | Lyu5400 | [X]Other manipulation-assisted delivery                     |
| 26 | 69971  | Z253100 | Slow rate of delivery                                       |
| 27 | 61226  | ZV27y00 | [V]Other specified outcome of delivery                      |
| 28 | 105276 | 7F14000 | Breech extraction delivery with version                     |
| 29 | 103890 | 1514000 | Estimated date of delivery from last period                 |
| 30 | 101229 | Z255A00 | Observation of delivery push in labour                      |
| 31 | 50675  | L395100 | Forceps delivery - delivered                                |
| 32 | 44472  | L39y.00 | Other complications of labour and delivery                  |
| 33 | 48742  | Z254C00 | Face delivery                                               |
| 34 | 33884  | L213000 | Multiple delivery, all spontaneous                          |
| 35 | 14892  | 7F17z00 | Vacuum delivery NOS                                         |
| 36 | 64464  | 7F15z00 | Other breech delivery NOS                                   |
| 37 | 13163  | 62B..00 | Delivery booking place                                      |
| 38 | 105419 | 7F17000 | High vacuum delivery                                        |
| 39 | 8879   | 1514.12 | Estimated date of delivery                                  |
| 40 | 720    | L398.00 | Caesarean delivery                                          |
| 41 | 29885  | L3...00 | Complications occurring during labour and delivery          |
| 42 | 14727  | 14Y1.00 | Born by forceps delivery                                    |
| 43 | 15675  | 14Y5.00 | Born by ventouse delivery                                   |
| 44 | 167    | 7F19.00 | Normal delivery                                             |
| 45 | 32991  | 62C1.00 | Short stay delivery booking                                 |
| 46 | 688    | 7F17.11 | Ventouse delivery                                           |
| 47 | 463    | L222.12 | Breech delivery                                             |
| 48 | 6141   | L396.11 | Ventouse delivery                                           |
| 49 |        |         |                                                             |
| 50 |        |         |                                                             |
| 51 |        |         |                                                             |
| 52 |        |         |                                                             |
| 53 |        |         |                                                             |
| 54 |        |         |                                                             |
| 55 |        |         |                                                             |
| 56 |        |         |                                                             |
| 57 |        |         |                                                             |
| 58 |        |         |                                                             |
| 59 |        |         |                                                             |
| 60 |        |         |                                                             |

|    |        |         |                                                             |
|----|--------|---------|-------------------------------------------------------------|
| 1  |        |         |                                                             |
| 2  |        |         |                                                             |
| 3  |        |         |                                                             |
| 4  |        |         |                                                             |
| 5  |        |         |                                                             |
| 6  |        |         |                                                             |
| 7  |        |         |                                                             |
| 8  |        |         |                                                             |
| 9  |        |         |                                                             |
| 10 |        |         |                                                             |
| 11 |        |         |                                                             |
| 12 |        |         |                                                             |
| 13 |        |         |                                                             |
| 14 |        |         |                                                             |
| 15 |        |         |                                                             |
| 16 |        |         |                                                             |
| 17 |        |         |                                                             |
| 18 |        |         |                                                             |
| 19 |        |         |                                                             |
| 20 |        |         |                                                             |
| 21 |        |         |                                                             |
| 22 |        |         |                                                             |
| 23 |        |         |                                                             |
| 24 |        |         |                                                             |
| 25 |        |         |                                                             |
| 26 |        |         |                                                             |
| 27 |        |         |                                                             |
| 28 |        |         |                                                             |
| 29 |        |         |                                                             |
| 30 |        |         |                                                             |
| 31 |        |         |                                                             |
| 32 |        |         |                                                             |
| 33 |        |         |                                                             |
| 34 |        |         |                                                             |
| 35 |        |         |                                                             |
| 36 |        |         |                                                             |
| 37 |        |         |                                                             |
| 38 |        |         |                                                             |
| 39 |        |         |                                                             |
| 40 |        |         |                                                             |
| 41 |        |         |                                                             |
| 42 |        |         |                                                             |
| 43 |        |         |                                                             |
| 44 |        |         |                                                             |
| 45 |        |         |                                                             |
| 46 |        |         |                                                             |
| 47 |        |         |                                                             |
| 48 |        |         |                                                             |
| 49 |        |         |                                                             |
| 50 |        |         |                                                             |
| 51 |        |         |                                                             |
| 52 |        |         |                                                             |
| 53 |        |         |                                                             |
| 54 |        |         |                                                             |
| 55 |        |         |                                                             |
| 56 |        |         |                                                             |
| 57 |        |         |                                                             |
| 58 |        |         |                                                             |
| 59 |        |         |                                                             |
| 60 |        |         |                                                             |
|    | 28903  | Z254200 | Delivered by low forceps delivery                           |
|    | 100597 | L39y100 | Other complications of labour and delivery - delivered      |
|    | 12014  | ZV27.00 | [V]Outcome of delivery                                      |
|    | 61259  | 7F12000 | Elective upper uterine segment caesarean delivery           |
|    | 105032 | L143000 | Premature labour without delivery                           |
|    | 42885  | Z254.00 | Observation of pattern of delivery                          |
|    | 107557 | 63D7.00 | Complete placenta at delivery                               |
|    | 37254  | Q030.00 | Fetus or neonate affected by breech delivery and extraction |
|    | 3078   | Q032.00 | Fetus or neonate affected by forceps delivery               |
|    | 19600  | L341.00 | Second degree perineal tear during delivery                 |
|    | 39576  | L343.00 | Fourth degree perineal tear during delivery                 |
|    | 31280  | L340500 | Vulval tear during delivery                                 |
|    | 25545  | Z212300 | Delivery place booked                                       |
|    | 70242  | 7F16700 | Barton forceps cephalic delivery with rotation              |
|    | 71057  | L345100 | Vulval and perineal haematoma during delivery - delivered   |
|    | 1279   | 7F16.00 | Forceps cephalic delivery                                   |
|    | 22976  | 62B2.00 | Home delivery booked                                        |
|    | 41414  | 62B6.00 | Delivery booking place changed                              |
|    | 104873 | L143.00 | Premature labour and delivery                               |
|    | 50847  | L398600 | Caesarean delivery following previous Caesarean delivery    |
|    | 18287  | 7F22500 | Normal delivery of placenta                                 |
|    | 19604  | L342000 | Third degree perineal tear during delivery, unspecified     |
|    | 2943   | L222.11 | Assisted breech delivery                                    |
|    | 96089  | Z253200 | Rapid rate of delivery                                      |
|    | 8967   | 7F19z00 | Normal delivery NOS                                         |
|    | 51065  | 62CZ.00 | Delivery booking - stay NOS                                 |
|    | 33378  | 7F15.00 | Other breech delivery                                       |
|    | 53937  | L395000 | Forceps delivery unspecified                                |
|    | 90497  | L39z400 | Complications of labour and delivery NOS with p/n problem   |
|    | 23994  | 7F15100 | Assisted breech delivery                                    |
|    | 60256  | Z254B00 | Brow delivery                                               |
|    | 60538  | L213100 | Multiple delivery, all by forceps and vacuum extractor      |
|    | 15926  | 7F15y00 | Other specified other breech delivery                       |
|    | 95780  | Z262600 | Complete placenta at delivery                               |
|    | 65702  | L38..00 | Complications of anaesthesia during labour and delivery     |
|    | 14686  | 7F16z00 | Forceps cephalic delivery NOS                               |
|    | 67052  | L344100 | Unspecified perineal laceration during delivery - delivered |
|    | 15167  | L142.00 | Early onset of delivery                                     |
|    | 11194  | Z257.12 | Spontaneous vaginal delivery                                |
|    | 25681  | Z257.13 | SVD - Spontaneous vaginal delivery                          |
|    | 9383   | Z257.11 | Normal delivery                                             |
|    | 17492  | Z257.14 | FTND - Full term normal delivery                            |
|    | 31780  | L222.13 | Spontaneous breech delivery                                 |
|    | 22498  | Z253.12 | Rate of delivery                                            |
|    | 52151  | Lyu4800 | [X]Labour+delivery complicat/oth evidence of fetal distress |

|    |        |         |                                                              |
|----|--------|---------|--------------------------------------------------------------|
| 1  |        |         |                                                              |
| 2  |        |         |                                                              |
| 3  | 39319  | 8HE7.00 | Discharged from hospital within 6 hours of delivery          |
| 4  | 73048  | 7F14y00 | Other specified breech extraction delivery                   |
| 5  | 109452 | 7F1By00 | Other specified other operation to facilitate delivery       |
| 6  | 69920  | L39z.00 | Complications of labour and delivery NOS                     |
| 7  | 57652  | L343z00 | Fourth degree perineal tear during delivery NOS              |
| 8  | 53100  | 7F20z00 | Instrumental removal products of concep delivered uterus NOS |
| 9  | 41494  | 7F21z00 | Manual removal products of conception delivered uterus NOS   |
| 10 | 27800  | L124300 | Mild or unspecified pre-eclampsia - not delivered            |
| 11 | 41588  | L112200 | Placental abruption - not delivered                          |
| 12 | 3364   | L126300 | Eclampsia - not delivered                                    |
| 13 | 65759  | L244300 | Other uterine/pelvic floor abnormal - baby not yet delivered |
| 14 | 62880  | L110200 | Placenta praevia without haemorrhage - not delivered         |
| 15 | 69002  | L11y200 | Other antepartum haemorrhage - not delivered                 |
| 16 | 67447  | L125300 | Severe pre-eclampsia - not delivered                         |
| 17 | 64752  | L111200 | Placenta praevia with haemorrhage - not delivered            |
| 18 | 53160  | L127300 | Pre-eclampsia or eclampsia with hypertension - not delivered |
| 19 | 31617  | L130200 | Mild hyperemesis-not delivered                               |
| 20 | 57852  | L100200 | Threatened abortion - not delivered                          |
| 21 | 64298  | L141100 | Other threatened labour - not delivered                      |
| 22 | 54082  | L169300 | Herpes gestationis - not delivered                           |
| 23 | 48830  | L140100 | Threatened premature labour - not delivered                  |
| 24 | 54576  | Z252.00 | Mother not delivered                                         |
| 25 | 2549   | L222.00 | Breech presentation                                          |
| 26 | 13288  | 2722    | O/E - breech presentation                                    |
| 27 | 46298  | L222z00 | Breech presentation NOS                                      |
| 28 | 55359  | Q017100 | Fetus/neonate affected by breech presentation before labour  |
| 29 | 56867  | L300300 | Obstructed labour due to breech presentation                 |
| 30 | 66786  | L397z00 | Breech extraction NOS                                        |
| 31 | 48516  | Z254400 | Deliveries by breech extraction                              |
| 32 | 4955   | L397.00 | Breech extraction                                            |
| 33 | 66106  | L397000 | Breech extraction unspecified                                |
| 34 | 15610  | 7F06300 | External version of breech                                   |
| 35 | 1534   | 7F14100 | Forceps to aftercoming head (breech)                         |
| 36 | 66307  | L222000 | Breech presentation unspecified                              |
| 37 | 16097  | Q214z00 | Liveborn with unspecified fetal distress NOS                 |
| 38 | 33258  | L512.00 | Maternal care for diminished fetal movements                 |
| 39 | 67883  | L514.00 | Maternal care for poor fetal growth                          |
| 40 | 50733  | L263.12 | Fetal bradycardia                                            |
| 41 | 23009  | Q213.11 | Fetal distress in labour - liveborn                          |
| 42 | 48463  | Q410.00 | Fetal blood loss                                             |
| 43 | 23565  | L25..00 | Known or suspected fetal abnormality                         |
| 44 | 43428  | ZV28400 | [V]Screening for fetal growth retardation using ultrasonics  |
| 45 | 5479   | Q212.00 | Liveborn with prelabour fetal distress                       |
| 46 | 106201 | Qyu5400 | [X]Other specified fetal and neonatal haemorrhages           |
| 47 | 31481  | 7F04300 | Electrode applied to fetal scalp                             |
| 48 |        |         |                                                              |
| 49 |        |         |                                                              |
| 50 |        |         |                                                              |
| 51 |        |         |                                                              |
| 52 |        |         |                                                              |
| 53 |        |         |                                                              |
| 54 |        |         |                                                              |
| 55 |        |         |                                                              |
| 56 |        |         |                                                              |
| 57 |        |         |                                                              |
| 58 |        |         |                                                              |
| 59 |        |         |                                                              |
| 60 |        |         |                                                              |

|    |        |         |                                                               |
|----|--------|---------|---------------------------------------------------------------|
| 1  |        |         |                                                               |
| 2  |        |         |                                                               |
| 3  |        |         |                                                               |
| 4  | 107512 | Q102.11 | Fetal malnutrition without mention of 'light for dates'       |
| 5  | 96711  | Q408200 | Escherichia coli intra-amniotic fetal infection               |
| 6  | 98261  | 7F27y00 | OS non routine obstetric scan for fetal observations          |
| 7  | 43893  | Q470.00 | Idiopathic hydrops fetalis                                    |
| 8  | 19590  | 62O1.00 | Fetal movements felt                                          |
| 9  | 48576  | L22y.00 | Other fetal malposition and malpresentation                   |
| 10 | 64959  | 7F01100 | Fetoscopic examination of fetus and sampling of fetal blood   |
| 11 | 36640  | L265300 | Maternal care for poor fetal growth                           |
| 12 | 59566  | Q41yz00 | Fetal or newborn haemorrhage NOS                              |
| 13 | 72837  | 2763    | O/E - fetal heart 40-80                                       |
| 14 | 62654  | 4H72.00 | Amniotic fetal cell abnormal                                  |
| 15 | 28977  | L237.00 | Other fetal abnormality causing disproportion                 |
| 16 | 46514  | L263700 | Maternal care for fetal hypoxia                               |
| 17 | 60301  | 7P0H500 | Fetal echocardiography                                        |
| 18 | 27801  | 2755    | O/E - fetal movement diminished                               |
| 19 | 67438  | Q40y000 | Intrauterine fetal sepsis, unspecified                        |
| 20 | 63905  | Lyu3A00 | [X]Maternal care/known or suspected fetal problem,unspecified |
| 21 | 46784  | Q023200 | Fetus/neonate affected by materno-fetal transplacental trans  |
| 22 | 50281  | Q213z00 | Liveborn with labour fetal distress NOS                       |
| 23 | 25153  | 2753    | O/E - fetal movements felt                                    |
| 24 | 103893 | 7F27400 | Fetal ascites scan                                            |
| 25 | 66619  | Q023011 | Fetus/neonate affected by feto-fetal transplacental transfus  |
| 26 | 101225 | BBK3400 | [M]Fetal rhabdomyoma                                          |
| 27 | 104765 | Q102.00 | Fetal malnutrition, no mention light or small for gest age    |
| 28 | 96669  | L22z.00 | Fetal malposition and malpresentation NOS                     |
| 29 | 55071  | Z271C00 | Fetal heart baseline pattern                                  |
| 30 | 22815  | 275..00 | O/E - fetal movements                                         |
| 31 | 69819  | 274Z.00 | O/E - fetal station NOS                                       |
| 32 | 56744  | Q10..11 | Fetal malnutrition                                            |
| 33 | 9164   | 584..11 | Fetal U-S scan                                                |
| 34 | 66175  | Q45z.00 | Fetal or newborn blood disorder NOS                           |
| 35 | 102019 | Q410600 | Fetal haemorrhage into mother's circulation                   |
| 36 | 104829 | L260000 | Fetal-maternal haemorrhage unspecified                        |
| 37 | 97471  | Q212z00 | Liveborn with prelabour fetal distress NOS                    |
| 38 | 100323 | 4H7..00 | Amniotic fetal cell study                                     |
| 39 | 73393  | 4H71.00 | Amniotic fetal cell study: NAD                                |
| 40 | 53296  | 42YG.00 | Fetal cell test                                               |
| 41 | 48798  | Q45..00 | Fetal and newborn blood disorders                             |
| 42 | 21893  | L510.00 | Maternal care for hydrops fetalis                             |
| 43 | 60774  | Z271100 | Fetal heart acceleration                                      |
| 44 | 62898  | 2768    | O/E - fetal heart 180-200                                     |
| 45 | 95881  | 2762    | O/E - fetal heart < 40                                        |
| 46 | 70856  | 2764    | O/E - fetal heart 80-100                                      |
| 47 | 67186  | 272Z.00 | O/E - fetal presentation NOS                                  |
| 48 | 38608  | L250.11 | Suspect fetal anencephaly                                     |
| 49 |        |         |                                                               |
| 50 |        |         |                                                               |
| 51 |        |         |                                                               |
| 52 |        |         |                                                               |
| 53 |        |         |                                                               |
| 54 |        |         |                                                               |
| 55 |        |         |                                                               |
| 56 |        |         |                                                               |
| 57 |        |         |                                                               |
| 58 |        |         |                                                               |
| 59 |        |         |                                                               |
| 60 |        |         |                                                               |



|    |        |         |                                                             |
|----|--------|---------|-------------------------------------------------------------|
| 1  |        |         |                                                             |
| 2  |        |         |                                                             |
| 3  | 8846   | L250.13 | Suspect fetal spina bifida                                  |
| 4  | 55152  | Q408.00 | Intra-amniotic fetal infection                              |
| 5  | 104218 | L300000 | Obstructed labour due to fetal malposition unspecified      |
| 6  | 99494  | Q455000 | Congenital anaemia from fetal blood loss                    |
| 7  | 91908  | 7F27200 | Fetal biometry                                              |
| 8  | 95754  | Q408z00 | Intra-amniotic fetal infection NOS                          |
| 9  | 62629  | Q41yy00 | Other specified fetal or newborn haemorrhage                |
| 10 | 95064  | Q41y.00 | Other fetal and newborn haemorrhage                         |
| 11 | 19575  | Q10z.00 | Fetal growth retardation NOS                                |
| 12 | 31033  | 7F03100 | Percutaneous insertion of fetal pleuroamniotic shunt        |
| 13 | 53241  | Q214100 | Liveborn with fetal hypoxia, unspecified                    |
| 14 | 26707  | 2766    | O/E - fetal heart 120-160                                   |
| 15 | 38846  | Z271D00 | Normal fetal heart baseline pattern                         |
| 16 | 44071  | Q479.00 | Non-immune hydrops fetalis                                  |
| 17 | 64335  | L263000 | Fetal distress unspecified                                  |
| 18 | 23590  | L300.00 | Obstructed labour due to fetal malposition                  |
| 19 | 102073 | Q410z00 | Fetal blood loss NOS                                        |
| 20 | 53687  | 2752    | O/E - fetal movements seen                                  |
| 21 | 42093  | 5846    | U-S scan - fetal maturity                                   |
| 22 | 3620   | Q214.00 | Liveborn with fetal distress, unspecified                   |
| 23 | 63024  | 2726    | O/E -fetal presentation unsure                              |
| 24 | 104845 | Q410700 | Fetal exsanguination                                        |
| 25 | 59679  | 276Z.00 | O/E - fetal heart NOS                                       |
| 26 | 100297 | L22zz00 | Fetal malposition and malpresentation NOS                   |
| 27 | 34777  | Q10..00 | Slow fetal growth and fetal malnutrition                    |
| 28 | 98499  | L25z300 | Maternal care for suspect fetal abnormal and damage, unspec |
| 29 | 96222  | L25z400 | Maternal care for fetal abnormality and damage, unspecified |
| 30 | 41908  | Q3z..00 | Fetal or newborn respiratory problems NOS                   |
| 31 | 28184  | Q436z00 | Unspecified fetal or neonatal jaundice NOS                  |
| 32 | 11589  | 7F25100 | Fetal heart monitoring in labour                            |
| 33 | 35680  | Q423.00 | Hydrops fetalis due to isoimmunisation                      |
| 34 | 45439  | Lyu3900 | [X]Maternal care/oth spcf known or suspected fetal problems |
| 35 | 12013  | L268000 | Reduced fetal movements                                     |
| 36 | 19581  | Q436.00 | Fetal and neonatal jaundice, unspecified                    |
| 37 | 32184  | L267500 | Other fetal problems                                        |
| 38 | 68996  | 2765    | O/E - fetal heart 100-120                                   |
| 39 | 62903  | 2767    | O/E - fetal heart 160-180                                   |
| 40 | 70845  | Z271E00 | Sinusoidal pattern of fetal heart                           |
| 41 | 52308  | Q211.00 | Fetal death due to labour anoxia                            |
| 42 | 101119 | 2769    | O/E - fetal heart > 200                                     |
| 43 | 27868  | 2761    | O/E - fetal heart not heard                                 |
| 44 | 39218  | 5858200 | Ultrasonic doppler for fetal heart sounds                   |
| 45 | 2437   | 2751    | O/E - no fetal movements                                    |
| 46 | 13276  | L263.00 | Fetal distress - affecting management                       |
| 47 | 49294  | L26..00 | Other fetal and placental problems                          |
| 48 |        |         |                                                             |
| 49 |        |         |                                                             |
| 50 |        |         |                                                             |
| 51 |        |         |                                                             |
| 52 |        |         |                                                             |
| 53 |        |         |                                                             |
| 54 |        |         |                                                             |
| 55 |        |         |                                                             |
| 56 |        |         |                                                             |
| 57 |        |         |                                                             |
| 58 |        |         |                                                             |
| 59 |        |         |                                                             |
| 60 |        |         |                                                             |

|    |        |         |                                                             |
|----|--------|---------|-------------------------------------------------------------|
| 1  |        |         |                                                             |
| 2  |        |         |                                                             |
| 3  |        |         |                                                             |
| 4  | 41919  | 5849    | U-S scan - fetal presentation                               |
| 5  | 72159  | 5845    | U-S scan - fetal cephalometry                               |
| 6  | 91933  | Q410000 | Fetal blood loss, unspecified                               |
| 7  | 85992  | 7F27.00 | Non routine obstetric scan for fetal observations           |
| 8  | 95538  | Z271B00 | Poor baseline variability in fetal heart rate               |
| 9  | 36195  | L268.00 | Other fetal problems                                        |
| 10 | 8147   | L264.11 | Fetal death in utero                                        |
| 11 | 94785  | 9Nk3.00 | Seen in fetal medicine clinic                               |
| 12 | 91477  | 7F03300 | Percutaneous insertion of fetal pleural drain               |
| 13 | 19720  | 7F25.11 | Fetal monitoring                                            |
| 14 | 983    | Q....11 | Fetal and neonatal conditions                               |
| 15 | 26710  | 272..00 | O/E - fetal presentation                                    |
| 16 | 45963  | 5847    | U-S scan - fetal abnormality                                |
| 17 | 46413  | L250.12 | Suspect fetal hydrocephaly                                  |
| 18 | 48801  | Q41..00 | Fetal and neonatal haemorrhage                              |
| 19 | 95875  | 7F27z00 | Non routine obstetric scan for fetal observations NOS       |
| 20 | 39868  | Q420.11 | Erythroblastosis fetalis                                    |
| 21 | 50201  | Q31..00 | Other fetal and newborn respiratory conditions              |
| 22 | 55607  | Z271900 | Fetal heart rate variability                                |
| 23 | 47149  | Z271F00 | Fetal heart deceleration                                    |
| 24 | 102894 | L260z00 | Fetal-maternal haemorrhage NOS                              |
| 25 | 91773  | Z271A00 | Good baseline variability in fetal heart rate               |
| 26 | 46502  | Q21..12 | Labour fetal anoxia                                         |
| 27 | 46431  | 7F04100 | Percutaneous sampling of fetal blood                        |
| 28 | 9501   | 7F25000 | Fetal heart monitoring NEC                                  |
| 29 | 19582  | Q493.00 | Persistent fetal circulation                                |
| 30 | 7681   | 276..00 | O/E - fetal heart heard                                     |
| 31 | 62316  | L51..00 | Maternal care for other known or suspected fetal problems   |
| 32 | 53420  | L263.13 | Fetal tachycardia                                           |
| 33 | 54004  | 7F03000 | Percutaneous insertion of fetal vesicoamniotic shunt        |
| 34 | 34132  | Q212.11 | Fetal distress before labour - liveborn                     |
| 35 | 42322  | Q213.00 | Liveborn with labour fetal distress                         |
| 36 | 20320  | Q210.00 | Fetal death due to prelabour anoxia                         |
| 37 | 107794 | 4H7Z.00 | Amniotic fetal cell study NOS                               |
| 38 | 106136 | Q410200 | Fetal placental blood loss                                  |
| 39 | 66335  | L260.00 | Fetal-maternal haemorrhage                                  |
| 40 | 53863  | L263z00 | Fetal distress NOS                                          |
| 41 | 41102  | L263500 | Lab+del comp fetal ht rate anom wth meconium in amnio fluid |
| 42 | 35214  | Z271912 | FHRV - Fetal heart rate variability                         |
| 43 | 26401  | Q214.11 | Fetal distress, unspecified when, liveborn                  |
| 44 | 54687  | L51X.00 | Maternal care/known or suspected fetal problem,unspecifd    |
| 45 | 37752  | 62O3.00 | Fetal maturity: dates = size                                |
| 46 | 55493  | 62O2.00 | Fetal movements seen                                        |
| 47 | 52857  | 275Z.00 | O/E - fetal movements NOS                                   |
| 48 | 110134 | Z271G00 | Early fetal heart deceleration                              |
| 49 |        |         |                                                             |
| 50 |        |         |                                                             |
| 51 |        |         |                                                             |
| 52 |        |         |                                                             |
| 53 |        |         |                                                             |
| 54 |        |         |                                                             |
| 55 |        |         |                                                             |
| 56 |        |         |                                                             |
| 57 |        |         |                                                             |
| 58 |        |         |                                                             |
| 59 |        |         |                                                             |
| 60 |        |         |                                                             |

|    |        |         |                                                              |
|----|--------|---------|--------------------------------------------------------------|
| 1  |        |         |                                                              |
| 2  |        |         |                                                              |
| 3  |        |         |                                                              |
| 4  | 13299  | Q42X.00 | Hydrops fetalis due to other+unspcfd haemolytic disease      |
| 5  | 100342 | PK81.00 | Fetal hydantoin syndrome                                     |
| 6  | 50913  | P7z..11 | Fetal circulation                                            |
| 7  | 51372  | Q311z11 | Pneumonitis due to fetal aspiration                          |
| 8  | 97985  | Z271H00 | Late fetal heart deceleration                                |
| 9  | 95649  | L263.11 | Fetal acidosis                                               |
| 10 | 48784  | 62O4.00 | Fetal maturity: dates not=size                               |
| 11 | 66428  | Q026.11 | Fetus affected by cord problems                              |
| 12 | 1017   | Q034.00 | Fetus or neonate affected by caesarean section               |
| 13 | 97885  | 7F01000 | Fetoscopic examination of fetus and biopsy of fetus          |
| 14 | 47151  | L220.00 | Fetus - unstable lie                                         |
| 15 | 97186  | 7F03z00 | Therapeutic percutaneous operation on fetus NOS              |
| 16 | 26685  | Q035600 | Fetus/neonate affected by other maternal opiates in lab/del  |
| 17 | 62776  | Q037.11 | Fetus or neonate affected by hypertonic labour               |
| 18 | 5538   | Q024.00 | Fetus or neonate affected by prolapsed cord                  |
| 19 | 91659  | Q022.00 | Fetus/neonate affected by placental abnormality NEC          |
| 20 | 105625 | Q027.00 | Fetus or neonate affected by chorioamnionitis                |
| 21 | 72118  | L257.00 | Fetus with damage due to intra-uterine contraceptive device  |
| 22 | 52007  | L255.00 | Fetus with drug damage                                       |
| 23 | 73892  | Q00z.00 | Fetus or neonate affected by maternal medical problem NOS    |
| 24 | 67326  | Q04X.00 | Fetus+newborn affected/other maternal noxious influences     |
| 25 | 69257  | L25y000 | Fetus with other damage NEC, unspecified                     |
| 26 | 71987  | Q007A00 | Fetus/neonate affect-plac./breast transf hypoglycaemic agent |
| 27 | 63290  | Q101.00 | Fetus small-for-dates with signs of malnutrition             |
| 28 | 52669  | Q031200 | Fetus/neonate affect persistent occip-posterior - labour/del |
| 29 | 61063  | L25zz00 | Fetus with damage NOS                                        |
| 30 | 99136  | Q021200 | Fetus/neonate affected by placental damage-amniocentesis     |
| 31 | 45440  | 7F00.00 | Therapeutic fetoscopic operations on fetus                   |
| 32 | 30979  | 7N61200 | [SO]Fetus                                                    |
| 33 | 69435  | 7F02z00 | Selective destruction of fetus NOS                           |
| 34 | 61452  | 7F0z.00 | Fetus and gravid uterus operations NOS                       |
| 35 | 46724  | Q022200 | Fetus or neonate affected by placental insufficiency         |
| 36 | 105097 | L250300 | Maternal care for suspected CNS malformation in fetus        |
| 37 | 52633  | Q021111 | Fetus affected by placental abruption                        |
| 38 | 36894  | Q100.11 | Fetus small-for-dates (SFD), without mention of malnutrition |
| 39 | 94808  | Q017600 | Fetus or neonate affected by face presentation before labour |
| 40 | 103741 | 7F2A211 | Doppler ultrasound scan of middle cerebral artery of fetus   |
| 41 | 51177  | L5...00 | Maternal care for fetus                                      |
| 42 | 106508 | 7F03600 | Percutaneous laser ablation of lesion of fetus               |
| 43 | 44173  | 5391    | Obstetric X-ray - fetus                                      |
| 44 | 38864  | L160.00 | Papyraceous fetus                                            |
| 45 | 48156  | Q025000 | Fetus or neonate affected by cord round neck                 |
| 46 | 59236  | L25z.00 | Fetus with damage NOS                                        |
| 47 | 53074  | L251z00 | Fetus with chromosomal abnormality NOS                       |
| 48 | 66699  | PK83.00 | Fetus and newborn affected by maternal use of alcohol        |
| 49 |        |         |                                                              |
| 50 |        |         |                                                              |
| 51 |        |         |                                                              |
| 52 |        |         |                                                              |
| 53 |        |         |                                                              |
| 54 |        |         |                                                              |
| 55 |        |         |                                                              |
| 56 |        |         |                                                              |
| 57 |        |         |                                                              |
| 58 |        |         |                                                              |
| 59 |        |         |                                                              |
| 60 |        |         |                                                              |

|    |        |         |                                                              |
|----|--------|---------|--------------------------------------------------------------|
| 1  |        |         |                                                              |
| 2  |        |         |                                                              |
| 3  |        |         |                                                              |
| 4  | 66571  | Qyu5200 | [X]Oth intracranial(nontraumatic)haemorrhages/fetus+newborn  |
| 5  | 31923  | Q021300 | Fetus/neonate affected by placental damage-caesarean section |
| 6  | 72366  | 7F02y00 | Other specified selective destruction of fetus               |
| 7  | 62819  | 7F04z00 | Diagnostic percutaneous examination of fetus NOS             |
| 8  | 72973  | Qyu5500 | [X]Other haemolytic diseases of fetus and newborn            |
| 9  | 45653  | Q025.00 | Fetus or neonate affected by other cord compression          |
| 10 | 23483  | Q023.00 | Fetus or neonate affected by placental transfusion syndrome  |
| 11 | 97240  | Q027100 | Fetus or neonate affected by amnionitis                      |
| 12 | 72834  | Q41z.00 | Haemorrhage of fetus and newborn NOS                         |
| 13 | 52950  | Q013.00 | Fetus or neonate affected by maternal polyhydramnios         |
| 14 | 41937  | 5848    | U-S scan - multiple fetus                                    |
| 15 | 63077  | Q00y.00 | Fetus or neonate affected by other maternal condition        |
| 16 | 34695  | L22..11 | Malpresentation of fetus                                     |
| 17 | 15495  | Q42z.00 | Haemolytic disease of fetus/newborn due isoimmunisation NOS  |
| 18 | 22032  | Q100.00 | Fetus small-for-dates, without mention of malnutrition       |
| 19 | 43005  | Q200012 | Intracranial haemorrhage in fetus or newborn                 |
| 20 | 36559  | Q200011 | Intracerebral haemorrhage in fetus or newborn                |
| 21 | 71279  | L250000 | Fetus with central nervous system malformation unspecified   |
| 22 | 40870  | Q020.00 | Fetus or neonate affected by placenta previa                 |
| 23 | 85238  | Qyu5F00 | [X]Intracranial nontraumatic haemorrhage fetus newborn unsp  |
| 24 | 106959 | Qyu0200 | [X]Fetus and newborn affected by other maternal conditions   |
| 25 | 46283  | 7F0..00 | Fetus and gravid uterus operations                           |
| 26 | 682    | Q42..00 | Haemolytic disease of fetus/newborn due to isoimmunisation   |
| 27 | 27334  | Q026z00 | Fetus or neonate affected by cord problems NOS               |
| 28 | 50530  | 7F0y.00 | Other specified operations on fetus or gravid uterus         |
| 29 | 28487  | Q....13 | Fetus and neonate conditions                                 |
| 30 | 71910  | Q037200 | Fetus or neonate affected by hypertonic uterine dysfunction  |
| 31 | 70737  | L25z000 | Fetus with damage NOS, unspecified                           |
| 32 | 56697  | Q041.00 | Fetus and newborn affect by mat use of nutritional chem subs |
| 33 | 54726  | L251400 | Maternal care for chromosomal abnormality in fetus           |
| 34 | 101599 | L253300 | Maternal care for damage to fetus from maternal rubella      |
| 35 | 101893 | L251300 | Maternal care for suspected chromosomal abnormality in fetus |
| 36 | 66526  | Q035200 | Fetus/neonate affected by mat general anaesthesia - lab/del  |
| 37 | 99890  | Q021400 | Fetus/neonate affect by placental damage-surgical induction  |
| 38 | 44479  | Q200511 | Intracerebral haematoma in fetus or newborn                  |
| 39 | 47219  | Q035300 | Fetus/neonate affected by mat epidural anaesth - labour/del  |
| 40 | 52526  | Q200600 | Extradural haemorrhage in fetus or newborn                   |
| 41 | 105735 | Q007B00 | Fetus/neonate affected-plac./breast transfer endocrine agent |
| 42 | 21382  | 27B..00 | O/E - viable fetus                                           |
| 43 | 100241 | L25y.00 | Fetus with other damage NEC                                  |
| 44 | 26840  | Q017500 | Fetus or neonate affected by unstable lie before labour      |
| 45 | 95128  | 9d06.00 | Fetus                                                        |
| 46 | 26631  | Q000.00 | Fetus or neonate affected by maternal hypertensive disease   |
| 47 | 73317  | L252.00 | Fetus with hereditary disease                                |
| 48 | 48583  | Q031600 | Fetus/neonate affected by disproportion during labour/delive |
| 49 |        |         |                                                              |
| 50 |        |         |                                                              |
| 51 |        |         |                                                              |
| 52 |        |         |                                                              |
| 53 |        |         |                                                              |
| 54 |        |         |                                                              |
| 55 |        |         |                                                              |
| 56 |        |         |                                                              |
| 57 |        |         |                                                              |
| 58 |        |         |                                                              |
| 59 |        |         |                                                              |
| 60 |        |         |                                                              |

|    |        |         |                                                              |
|----|--------|---------|--------------------------------------------------------------|
| 1  |        |         |                                                              |
| 2  |        |         |                                                              |
| 3  |        |         |                                                              |
| 4  | 71637  | Q017.11 | Fetus affected by malpresentation                            |
| 5  | 71495  | L250z00 | Fetus with central nervous system malformation NOS           |
| 6  | 60841  | Q013.11 | Fetus affected by hydramnios                                 |
| 7  | 55149  | Qyu0100 | [X]Fetus+newborn affectd/oth medical procedure on mother,NEC |
| 8  |        |         |                                                              |
| 9  | 100666 | L252z00 | Fetus with hereditary disease NOS                            |
| 10 | 66748  | Qyu0C00 | [X]Fetus+newborn affected/other maternal noxious influences  |
| 11 | 43958  | Q023000 | Fetus/neonate affected by twin-to-twin transplacental transf |
| 12 | 23617  | L22..00 | Malposition and malpresentation of fetus                     |
| 13 | 68016  | L253.11 | Fetus with suspected rubella damage via mother               |
| 14 | 65716  | Q011.00 | Fetus/neonate affected maternal premature rupture membrane   |
| 15 | 20721  | 7F0..11 | Fetus operations                                             |
| 16 |        |         |                                                              |
| 17 | 59580  | 7F0..12 | Fetus & gravid uterus ops                                    |
| 18 | 72558  | Q016.00 | Fetus or neonate affected by maternal death                  |
| 19 |        |         |                                                              |
| 20 | 38043  | Q200500 | Cerebral haematoma in fetus or newborn                       |
| 21 | 52299  | Q007200 | Fetus/neonate affected by placental/breast transfer narcotic |
| 22 | 68169  | Q021.00 | Fetus/neonate affect other placental separation/haemorrhage  |
| 23 | 37055  | Q035500 | Fetus/neonate affected by maternal pethidine in labour/deliv |
| 24 | 16963  | 7F00000 | Fetoscopic blood transfusion of fetus                        |
| 25 | 61596  | Q017300 | Fetus or neonate affected by oblique lie before labour       |
| 26 | 55761  | Q021500 | Fetus or neonate affected by premature placental separation  |
| 27 | 44644  | L250.00 | Fetus with central nervous system malformation               |
| 28 | 58187  | Lyu4500 | [X]Obstructed labour due to other abnormalities of fetus     |
| 29 | 108080 | Qyu0.00 | [X]Fetus/newborn affected by maternal factors+complications  |
| 30 | 91434  | L251.12 | Suspect mongol fetus                                         |
| 31 | 42661  | Q021011 | Fetus affected by APH - antepartum haemorrhage               |
| 32 | 63309  | Q037312 | Fetus/neonate affected by uterine dysfunction in labour/del  |
| 33 | 95638  | Q101.11 | Fetus small-for-dates (SFD) with signs of malnutrition       |
| 34 | 69015  | L251.11 | Suspect cystic fibrosis fetus                                |
| 35 | 64430  | Q007C00 | Fetus/neonate affected-plac./breast transfer addictive drug  |
| 36 | 59171  | Q017400 | Fetus or neonate affected by transverse lie before labour    |
| 37 | 57828  | 7F03200 | Percutaneous blood transfusion of fetus                      |
| 38 | 24701  | 2754    | O/E - fetus very active                                      |
| 39 | 72833  | Q02z.00 | Fetus/neonate affected by abnormalities chorion/amnion NOS   |
| 40 | 104029 | Qyu0B00 | [X]Fetus and newborn affected by other maternal medication   |
| 41 | 70901  | Q023100 | Fetus/neonate affected by feto-maternal transplacental trans |
| 42 | 7103   | Q000.11 | Fetus affected by maternal toxemia                           |
| 43 | 109421 | Q03y400 | Fetus or neonate affected by long labour                     |
| 44 | 20544  | Q031611 | Fetus/neonate affected-cephalopelvic disproportion lab./del. |
| 45 | 99563  | 27A..11 | O/E - VE - descent of fetus                                  |
| 46 | 50555  | Q012.00 | Fetus or neonate affected by maternal oligohydramnios        |
| 47 | 101603 | Q010.00 | Fetus or neonate affected by maternal incompetent cervix     |
| 48 | 72348  | Q007800 | Fetus/neonate affected-plac./breast transfer chemotherapy    |
| 49 | 30692  | L251.00 | Fetus with chromosomal abnormality                           |
| 50 | 45856  | Q002.00 | Fetus or neonate affected by maternal infections             |
| 51 | 49959  | Q005.00 | Fetus or neonate affected by maternal injury                 |

|        |         |                                                              |
|--------|---------|--------------------------------------------------------------|
| 93329  | Q007400 | Fetus/neonate affected-placental/breast transfer anti-infect |
| 72729  | L253.00 | Fetus with viral damage via mother                           |
| 63648  | Q021000 | Fetus/neonate affected by antepartum haemorrhage unspecified |
| 96742  | Q007300 | Fetus/neonate affected-placenta/breast transfer hallucinogen |
| 68851  | Q00..00 | Fetus or neonate affected by maternal medical problems       |
| 54690  | L250400 | Maternal care for CNS malformation in fetus                  |
| 108565 | Qyu0700 | [X]Fetus+newborn affectd/oth+unspcfd conditns/umbilical cord |
| 108626 | Qyu7.00 | [X]Digestive system disorders of fetus and newborn           |
| 38660  | Q3...00 | Fetus and newborn respiratory conditions                     |
| 42226  | Q017200 | Fetus or neonate affected by external version before labour  |
| 71951  | Q037300 | Fetus or neonate affected by uterine inertia or dysfunction  |
| 71552  | L235.00 | Large fetus causing disproportion                            |
| 67572  | Q031000 | Fetus/neonate affected by mat bony pelvis abn in labour/del  |
| 65059  | Qyu5.00 | [X]Haemorrhagic+haematolog disorders of fetus and newborn    |
| 68687  | L266300 | Suspected macroscopic fetus                                  |
| 52726  | Q031500 | Fetus/neonate affected by face presentation during labour/de |
| 27447  | Q031z00 | Fetus/neonate affected by malposition/disproportion NOS      |
| 54311  | Q02..00 | Fetus/neonate affected by complic of placenta/cord/membrane  |
| 100074 | 7F01.00 | Diagnostic endoscopic examination of fetus using fetoscope   |
| 101984 | 7F03.00 | Therapeutic percutaneous operations on fetus                 |
| 70393  | 7F04.00 | Diagnostic percutaneous examination of fetus                 |
| 102078 | Q027z00 | Fetus or neonate affected by chorioamnionitis                |
| 58773  | Q026.00 | Fetus or neonate affected by other specified cord problems   |
| 102535 | 7F00.12 | Therapeutic foetoscopic operations on fetus                  |
| 35777  | Q417.00 | Intracranial nontraumatic haemorrhage of fetus and newborn   |
| 31496  | Q007900 | Fetus/neonate affected-plac./breast transfer uterine depress |
| 107153 | Q007x00 | Fetus/neonate affected - placental/breast transfer toxic NEC |
| 40376  | PH11.00 | Harlequin fetus                                              |
| 56666  | L256.00 | Fetus with radiation damage                                  |
| 73323  | L254.00 | Fetus with damage due to other maternal disease              |
| 73373  | Q001.00 | Fetus or neonate affected by maternal renal/urinary disease  |
| 96331  | L258.00 | Fetus with cardiovascular abnormality                        |
| 105261 | Q007500 | Fetus/neonate affected-placental/breast transfer immune sera |
| 57651  | 7F02.00 | Selective destruction of fetus                               |
| 97611  | 7F03400 | Percutaneous insertion of bladder drain to fetus             |
| 108731 | 7F03y00 | Other specified therapeutic percutaneous operation on fetus  |
| 70074  | Q3y..00 | Other specified respiratory problems in fetus or neonate     |
| 69814  | Q022000 | Fetus or neonate affected by placental dysfunction           |
| 69533  | L257.12 | Fetus with damage due to intra-uterine contraceptive device  |
| 95909  | Q026400 | Fetus or neonate affected by vasa praevia of cord            |
| 55410  | L251000 | Fetus with chromosomal abnormality unspecified               |
| 37180  | 272..11 | O/E - lie of fetus                                           |
| 69076  | Q031300 | Fetus/neonate affected by shoulder presentation - labour/del |
| 61640  | L252000 | Fetus with hereditary disease unspecified                    |
| 96614  | Q035100 | Fetus/neonate affected by mat analgesic agent in labour/del  |

|    |        |         |                                                              |
|----|--------|---------|--------------------------------------------------------------|
| 1  |        |         |                                                              |
| 2  |        |         |                                                              |
| 3  |        |         |                                                              |
| 4  | 42213  | Q021100 | Fetus or neonate affected by abruptio placentae              |
| 5  | 104989 | Q018.00 | Fetus or neonate affected by maternal postnatal depression   |
| 6  | 70739  | L25yz00 | Fetus with other damage NEC NOS                              |
| 7  | 42384  | Q031400 | Fetus or neonate affected by transverse lie in labour/deliv  |
| 8  | 72757  | Q007100 | Fetus/neonate affected by placental/breast transfer alcohol  |
| 9  | 51296  | Q03y200 | Fetus or neonate affected by induction of labour             |
| 10 | 111265 | Qyu6.00 | [X]Transitory endocr & metab disord specif to fetus/newborn  |
| 11 | 59070  | Q037.00 | Fetus or neonate affected by abnormal uterine contractions   |
| 12 | 97745  | Q007600 | Fetus/neonate affected-plac./breast transfer anticonvulsant  |
| 13 | 27670  | L255300 | Maternal care for (suspected) damage to fetus from alcohol   |
| 14 | 92824  | Q031z11 | Fetus or neonate affected by obstructed labour NEC           |
| 15 | 99473  | Q007.00 | Fetus/neonate affected by poison transferred placenta/breast |
| 16 | 50940  | 5391.11 | Fetus - abdominal X-ray, obst.                               |
| 17 | 72836  | Q007w00 | Fetus/neonate affected-placenta/breast transfer medicine NEC |
| 18 | 97923  | Q025200 | Fetus or neonate affected by knot in cord                    |
| 19 | 68577  | Q037100 | Fetus or neonate affected by hypertonic labour               |
| 20 | 70165  | Q016.11 | Fetus affected by maternal death                             |
| 21 | 107075 | L043z11 | Unspecified inevitable miscarriage without complication      |
| 22 | 94976  | L044x11 | Incomplete inevitable miscarriage with unspecified comp      |
| 23 | 17625  | L044.11 | Inevitable miscarriage incomp                                |
| 24 | 55404  | L045z11 | Complete inevitable miscarriage without complication         |
| 25 | 12241  | L02..11 | Missed miscarriage                                           |
| 26 | 107604 | L045211 | Complete inevitable miscarriage complicated by embolism      |
| 27 | 53836  | L044z11 | Incomplete inevitable miscarriage without complication       |
| 28 | 96949  | L02..12 | Silent miscarriage                                           |
| 29 | 11323  | L045.11 | Inevitable miscarriage complete                              |
| 30 | 108742 | L045x11 | Complete inevitable miscarriage with unspecified comp        |
| 31 | 109228 | L043y11 | Unspecified inevitable miscarriage with OS complication      |
| 32 | 11234  | L043.11 | Inevitable miscarriage unspecified                           |
| 33 | 92284  | L044y11 | Incomplete inevitable miscarriage with other specified comp  |
| 34 | 48603  | L040900 | Inevitable miscarriage                                       |
| 35 | 99578  | L043x11 | Unspecified inevitable miscarriage with unspec complication  |
| 36 | 165    | L04..11 | Miscarriage                                                  |
| 37 | 57576  | L045y11 | Complete inevitable miscarriage with OS complication         |
| 38 | 3082   | L04..00 | Spontaneous abortion                                         |
| 39 | 2187   | L05..00 | Legally induced abortion                                     |
| 40 | 68740  | L041x00 | Incomplete spontaneous abortion with complication NOS        |
| 41 | 63778  | L042x00 | Complete spontaneous abortion with complication NOS          |
| 42 | 69183  | L052100 | Complete legal abortion with delayed/excessive haemorrhage   |
| 43 | 102820 | L050200 | Unspecified legal abortion + damage to pelvic organs/tissues |
| 44 | 41098  | L050x00 | Unspecified legal abortion with complication NOS             |
| 45 | 106524 | L071100 | Unspecified incomplete abortion + delayed/excess haemorrhage |
| 46 | 25883  | L071y00 | Unspecified incomplete abortion + no mention of complication |
| 47 | 99736  | L042000 | Complete spontaneous abortion + genital tract/pelvic infect  |
| 48 | 99590  | L052w00 | Complete legal abortion with other specified complication    |
| 49 |        |         |                                                              |
| 50 |        |         |                                                              |
| 51 |        |         |                                                              |
| 52 |        |         |                                                              |
| 53 |        |         |                                                              |
| 54 |        |         |                                                              |
| 55 |        |         |                                                              |
| 56 |        |         |                                                              |
| 57 |        |         |                                                              |
| 58 |        |         |                                                              |
| 59 |        |         |                                                              |
| 60 |        |         |                                                              |

|    |        |         |                                                              |
|----|--------|---------|--------------------------------------------------------------|
| 1  |        |         |                                                              |
| 2  |        |         |                                                              |
| 3  | 69190  | L052000 | Complete legal abortion + genital tract or pelvic infection  |
| 4  | 3874   | L031200 | Tubal abortion                                               |
| 5  | 56325  | L042y00 | Complete spontaneous abortion + no mention of complication   |
| 6  | 99955  | L040400 | Unspecified spontaneous abortion with metabolic disorder     |
| 7  | 60771  | L05..11 | Elective abortion                                            |
| 8  | 31431  | L05..13 | Therapeutic abortion                                         |
| 9  | 95625  | L044200 | Incomplete inevitable abortion complicated by embolism       |
| 10 | 40258  | L040011 | Spontaneous abortion with sepsis                             |
| 11 | 72593  | L044x00 | Incomplete inevitable abortion with unspecified complication |
| 12 | 49467  | L06..12 | Self-induced abortion                                        |
| 13 | 71289  | L06..11 | Criminal abortion                                            |
| 14 | 25605  | L100z00 | Threatened abortion NOS                                      |
| 15 | 58137  | L07z.00 | Unspecified abortion NOS                                     |
| 16 | 1886   | L072.00 | Unspecified abortion complete                                |
| 17 | 70643  | L070.00 | Unspecified abortion                                         |
| 18 | 56828  | L041w00 | Incomp spontaneous abortion + other specified complication   |
| 19 | 28605  | L051z00 | Incomplete legal abortion NOS                                |
| 20 | 38415  | L050z00 | Unspecified legal abortion NOS                               |
| 21 | 97991  | L062w00 | Complete illegal abortion with other specified complication  |
| 22 | 2034   | L10zz11 | Inevitable abortion                                          |
| 23 | 56224  | L070z00 | Unspecified abortion NOS                                     |
| 24 | 94404  | L061z00 | Incomplete illegal abortion NOS                              |
| 25 | 104747 | L040x00 | Unspecified spontaneous abortion with complication NOS       |
| 26 | 8173   | L043.00 | Inevitable abortion unspecified                              |
| 27 | 105470 | L040500 | Unspecified spontaneous abortion with shock                  |
| 28 | 102090 | L08y.00 | Failed attempted abortion with no mention of complication    |
| 29 | 68311  | L044y00 | Incomplete inevitable abortion with OS complication          |
| 30 | 9407   | 6776.11 | Abortion counselling                                         |
| 31 | 33501  | L045.00 | Inevitable abortion complete                                 |
| 32 | 1737   | L02..00 | Missed abortion                                              |
| 33 | 41606  | L06..00 | Illegally induced abortion                                   |
| 34 | 39470  | L08..00 | Failed attempted abortion                                    |
| 35 | 7413   | L041.00 | Spontaneous abortion incomplete                              |
| 36 | 1439   | L07..00 | Unspecified abortion                                         |
| 37 | 70384  | L050y00 | Unspecified legal abortion with no mention of complication   |
| 38 | 1879   | L071.00 | Unspecified abortion incomplete                              |
| 39 | 68938  | L040y00 | Unspec spontaneous abortion without mention of complication  |
| 40 | 49809  | LOA..00 | Failed attempted abortion                                    |
| 41 | 41783  | L041100 | Incomp spontaneous abortion + delayed/excessive haemorrhage  |
| 42 | 73445  | L050000 | Unspecified legal abortion + genital tract/pelvic infection  |
| 43 | 50612  | L052y00 | Complete legal abortion with no mention of complication      |
| 44 | 94359  | L042w00 | Complete spontaneous abortion + other specified complication |
| 45 | 68669  | L040w00 | Unspec spontaneous abortion + other specified complication   |
| 46 | 58085  | L052z00 | Complete legal abortion NOS                                  |
| 47 | 50903  | LOA2.00 | Failed medical abortion comp by delayed/excessive haem'ge    |
| 48 |        |         |                                                              |
| 49 |        |         |                                                              |
| 50 |        |         |                                                              |
| 51 |        |         |                                                              |
| 52 |        |         |                                                              |
| 53 |        |         |                                                              |
| 54 |        |         |                                                              |
| 55 |        |         |                                                              |
| 56 |        |         |                                                              |
| 57 |        |         |                                                              |
| 58 |        |         |                                                              |
| 59 |        |         |                                                              |
| 60 |        |         |                                                              |



|    |        |         |                                                              |
|----|--------|---------|--------------------------------------------------------------|
| 1  |        |         |                                                              |
| 2  |        |         |                                                              |
| 3  |        |         |                                                              |
| 4  | 33964  | L0A4.00 | Failed medical abortion, without complication                |
| 5  | 56822  | L050.00 | Legal abortion unspecified                                   |
| 6  | 51614  | L044z00 | Incomplete inevitable abortion without complication          |
| 7  | 41118  | L08z.00 | Failed attempted abortion NOS                                |
| 8  | 45806  | L070x00 | Unspecified abortion with complication NOS                   |
| 9  | 39754  | L051.11 | Medal abortion - incomplete                                  |
| 10 | 6730   | L051.12 | Surgical abortion - incomplete                               |
| 11 | 35184  | L071z00 | Unspecified incomplete abortion NOS                          |
| 12 | 105603 | L052500 | Complete legal abortion with shock                           |
| 13 | 107159 | L08x.00 | Failed attempted abortion with complication NOS              |
| 14 | 7817   | L042.00 | Spontaneous abortion complete                                |
| 15 | 106491 | L050100 | Unspecified legal abortion + delayed/excessive haemorrhage   |
| 16 | 66365  | L043y00 | Unspecified inevitable abortion with OS complication         |
| 17 | 47931  | L050w00 | Unspecified legal abortion with other specified complication |
| 18 | 47298  | L052.00 | Legal abortion complete                                      |
| 19 | 71529  | L060.00 | Illegal abortion unspecified                                 |
| 20 | 66561  | L062.00 | Illegal abortion complete                                    |
| 21 | 96418  | L06z.00 | Illegally induced abortion NOS                               |
| 22 | 56562  | L040z00 | Unspecified spontaneous abortion NOS                         |
| 23 | 47435  | L097200 | Readmission for retained produc of concept, illegal abortion |
| 24 | 72307  | L040000 | Unspec spontaneous abortion + genital tract/pelvic infection |
| 25 | 73443  | L051y00 | Incomplete legal abortion with no mention of complication    |
| 26 | 68936  | L051100 | Incomplete legal abortion + delayed or excessive haemorrhage |
| 27 | 96652  | L051w00 | Incomplete legal abortion with other specified complication  |
| 28 | 59084  | L071500 | Unspecified incomplete abortion with shock                   |
| 29 | 53229  | L060z00 | Unspecified illegal abortion NOS                             |
| 30 | 110905 | L070w00 | Unspecified abortion with other specified complication       |
| 31 | 29439  | L041z00 | Incomplete spontaneous abortion NOS                          |
| 32 | 21805  | L097300 | Readmission for retained produc of concept, unspec abortion  |
| 33 | 7114   | L044.00 | Inevitable abortion incomplete                               |
| 34 | 59572  | L0A3.00 | Failed medical abortion, complicated by embolism             |
| 35 | 22379  | L04z.00 | Spontaneous abortion NOS                                     |
| 36 | 59116  | L045x00 | Complete inevitable abortion with unspecified complication   |
| 37 | 12337  | L051.00 | Legal abortion incomplete                                    |
| 38 | 41379  | L052.11 | Medical abortion - complete                                  |
| 39 | 49849  | L052.12 | Surgical abortion - complete                                 |
| 40 | 906    | L100.00 | Threatened abortion                                          |
| 41 | 96598  | Z22CE00 | Number of induced abortions                                  |
| 42 | 29940  | L042z00 | Complete spontaneous abortion NOS                            |
| 43 | 94270  | L043x00 | Unspecified inevitable abortion with unspec complication     |
| 44 | 68511  | L040100 | Unspec spontaneous abortion + delayed/excessive haemorrhage  |
| 45 | 68110  | L043z00 | Unspecified inevitable abortion without complication         |
| 46 | 101218 | L051700 | Incomplete medical abortion                                  |
| 47 | 63777  | L045y00 | Complete inevitable abortion with OS complication            |
| 48 | 62659  | Lyu0200 | [X]Other abortion                                            |
| 49 |        |         |                                                              |
| 50 |        |         |                                                              |
| 51 |        |         |                                                              |
| 52 |        |         |                                                              |
| 53 |        |         |                                                              |
| 54 |        |         |                                                              |
| 55 |        |         |                                                              |
| 56 |        |         |                                                              |
| 57 |        |         |                                                              |
| 58 |        |         |                                                              |
| 59 |        |         |                                                              |
| 60 |        |         |                                                              |

|    |        |         |                                                              |
|----|--------|---------|--------------------------------------------------------------|
| 1  |        |         |                                                              |
| 2  |        |         |                                                              |
| 3  |        |         |                                                              |
| 4  | 101050 | L062000 | Complete illegal abortion + genital tract/pelvic infection   |
| 5  | 33770  | L05z.00 | Legally induced abortion NOS                                 |
| 6  | 101666 | L070300 | Unspecified abortion with renal failure                      |
| 7  | 105921 | L072y00 | Unspecified complete abortion + no mention of complication   |
| 8  | 107171 | L042100 | Complete spontaneous abortion +delayed/excessive haemorrhage |
| 9  | 42458  | L040.00 | Spontaneous abortion unspecified                             |
| 10 | 50653  | L041y00 | Incomp spontaneous abortion with no mention of complication  |
| 11 | 67076  | L052x00 | Complete legal abortion with complication NOS                |
| 12 | 4708   | 7E08800 | Dilation and curettage removal of missed abortion            |
| 13 | 30276  | L041z11 | Retained products after spontaneous abortion                 |
| 14 | 29594  | L072z00 | Unspecified complete abortion NOS                            |
| 15 | 23693  | L097100 | Readmission for retained produc of concept, legal abortion   |
| 16 | 35701  | L100000 | Threatened abortion unspecified                              |
| 17 | 33989  | L045z00 | Complete inevitable abortion without complication            |
| 18 | 45340  | L040111 | Spontaneous abortion with heavy bleeding                     |
| 19 | 102648 | 6776100 | Pre-termination counselling                                  |
| 20 | 17294  | 6776.13 | Termination counselling                                      |
| 21 | 100568 | 7F10y00 | Other specified surgical induction of labour                 |
| 22 | 96821  | Q212000 | Liveborn with prelabour abnormal heart beat                  |
| 23 | 23664  | 63E..00 | Labour details                                               |
| 24 | 97459  | L300700 | Obstructed labour due to compound presentation               |
| 25 | 64976  | Z243200 | First stage of labour not established                        |
| 26 | 73308  | L29z.00 | Problems affecting labour NOS                                |
| 27 | 66578  | L31..00 | Abnormal forces of labour                                    |
| 28 | 54127  | Z255.00 | Observation of second stage of labour                        |
| 29 | 109523 | L307000 | Other failed trial of labour unspecified                     |
| 30 | 102969 | Q213200 | Liveborn with labour meconium in liquor                      |
| 31 | 29434  | 63E3.00 | Normal labour                                                |
| 32 | 23316  | L140.11 | False labour                                                 |
| 33 | 72779  | L30z.00 | Obstructed labour NOS                                        |
| 34 | 67423  | Z23AG00 | Hypertonic lower uterine segment during labour               |
| 35 | 72736  | Z246200 | Onset of labour first stage                                  |
| 36 | 20809  | L14..00 | Early or threatened labour                                   |
| 37 | 3088   | 7F11.00 | Other induction of labour                                    |
| 38 | 108764 | L29y.00 | Other problems affecting labour                              |
| 39 | 23525  | L141.00 | Other threatened labour                                      |
| 40 | 34981  | 7F10z00 | Surgical induction of labour NOS                             |
| 41 | 64395  | Z255D00 | Ability to push in labour                                    |
| 42 | 70850  | Q212100 | Liveborn with prelabour hypoxia                              |
| 43 | 103105 | L293.00 | Septicaemia during labour                                    |
| 44 | 63287  | Z24..00 | Labour observations                                          |
| 45 | 83541  | Z243500 | Normal length of first stage of labour                       |
| 46 | 49302  | Z243100 | First stage of labour established                            |
| 47 | 33632  | 7F11200 | Syntocinon induction of labour                               |
| 48 | 93041  | Z246700 | Onset of second stage of labour                              |
| 49 |        |         |                                                              |
| 50 |        |         |                                                              |
| 51 |        |         |                                                              |
| 52 |        |         |                                                              |
| 53 |        |         |                                                              |
| 54 |        |         |                                                              |
| 55 |        |         |                                                              |
| 56 |        |         |                                                              |
| 57 |        |         |                                                              |
| 58 |        |         |                                                              |
| 59 |        |         |                                                              |
| 60 |        |         |                                                              |

|    |        |         |                                                             |
|----|--------|---------|-------------------------------------------------------------|
| 1  |        |         |                                                             |
| 2  |        |         |                                                             |
| 3  |        |         |                                                             |
| 4  | 64692  | L141z00 | Other threatened labour NOS                                 |
| 5  | 92738  | ZNA2300 | Does perform labouring activities                           |
| 6  | 36756  | L386.00 | Toxic reaction to local anaesthesia during labour and deliv |
| 7  | 49858  | Z23G.00 | Uterine observation in labour                               |
| 8  | 64206  | L313z00 | Precipitate labour NOS                                      |
| 9  | 109569 | L313000 | Precipitate labour unspecified                              |
| 10 | 25428  | Z246211 | Start of labour                                             |
| 11 | 23674  | L291.11 | Failed medical induction of labour                          |
| 12 | 87342  | Z244100 | Observation of duration of labour                           |
| 13 | 50876  | H472.00 | Asp pneumonitis due to anaesthesia during labour and deliv  |
| 14 | 93735  | Z246A00 | Total duration of labour                                    |
| 15 | 71189  | Z244400 | Late onset of labour                                        |
| 16 | 22115  | 7F10.00 | Surgical induction of labour                                |
| 17 | 59789  | L14z.00 | Early or threatened labour NOS                              |
| 18 | 54167  | 6322    | 2nd stage of labour length                                  |
| 19 | 44337  | L307.00 | Failed trial of labour unspecified                          |
| 20 | 32555  | L351000 | Rupture of uterus during and after labour unspecified       |
| 21 | 3004   | L14..11 | Premature labour                                            |
| 22 | 30782  | 632Z.00 | Length of labour NOS                                        |
| 23 | 65867  | 7M35011 | Entonox analgesia in labour                                 |
| 24 | 23549  | L31z.00 | Abnormality of forces of labour NOS                         |
| 25 | 66242  | Z243400 | Rapid first stage of labour                                 |
| 26 | 59445  | Z243800 | First stage of labour problem                               |
| 27 | 94809  | Z256200 | Prolonged third stage of labour                             |
| 28 | 99290  | Z255800 | Second stage of labour problem                              |
| 29 | 40448  | 7F11100 | Induction of labour using prostaglandins                    |
| 30 | 56873  | ZNA2200 | Unable to perform labouring activities                      |
| 31 | 88775  | 7F11300 | Medical induction of labour                                 |
| 32 | 40724  | Z255700 | Failure to progress in second stage of labour               |
| 33 | 45057  | OZ3Z.00 | Other labourer NOS                                          |
| 34 | 95570  | L307z00 | Failed trial of labour NOS                                  |
| 35 | 64732  | Q213000 | Liveborn with labour abnormal heart beat                    |
| 36 | 57002  | L290.11 | Failed mechanical induction of labour                       |
| 37 | 13215  | 632..00 | Length of labour                                            |
| 38 | 48484  | Z244500 | Relation of onset of labour to due date                     |
| 39 | 49953  | 6323    | 3rd stage of labour length                                  |
| 40 | 33421  | 7F11000 | Oxytocic induction of labour                                |
| 41 | 35628  | L321.00 | Prolonged labour unspecified                                |
| 42 | 100252 | Z255J00 | Pushing involuntarily in labour                             |
| 43 | 98422  | Q213100 | Liveborn with labour hypoxia                                |
| 44 | 63022  | L281500 | Prem rupture of membranes onset of labour after 24 hours    |
| 45 | 103000 | L29yz00 | Other problems affecting labour NOS                         |
| 46 | 98003  | Z23B400 | Contraction of uterus during labour                         |
| 47 | 73319  | L302.00 | Obstructed labour caused by pelvic soft tissues             |
| 48 | 55225  | L32z.00 | Prolonged labour NOS                                        |
| 49 |        |         |                                                             |
| 50 |        |         |                                                             |
| 51 |        |         |                                                             |
| 52 |        |         |                                                             |
| 53 |        |         |                                                             |
| 54 |        |         |                                                             |
| 55 |        |         |                                                             |
| 56 |        |         |                                                             |
| 57 |        |         |                                                             |
| 58 |        |         |                                                             |
| 59 |        |         |                                                             |
| 60 |        |         |                                                             |

|    |        |         |                                                             |
|----|--------|---------|-------------------------------------------------------------|
| 1  |        |         |                                                             |
| 2  |        |         |                                                             |
| 3  |        |         |                                                             |
| 4  | 41036  | 7M35000 | Gas and air analgesia in labour                             |
| 5  | 104405 | Z256100 | Normal length of third stage of labour                      |
| 6  | 71720  | L350z00 | Rupture of uterus before labour NOS                         |
| 7  | 60124  | Z243411 | Rapid progress in first stage of labour                     |
| 8  | 71171  | L350000 | Rupture of uterus before labour unspecified                 |
| 9  | 106135 | Z244200 | Long duration of labour                                     |
| 10 | 94874  | Z244300 | Short duration of labour                                    |
| 11 | 103154 | L321z00 | Prolonged labour NOS                                        |
| 12 | 65243  | L141000 | Other threatened labour unspecified                         |
| 13 | 60255  | L351z00 | Rupture of uterus during and after labour NOS               |
| 14 | 99968  | L321000 | Unspecified prolonged labour, unspecified                   |
| 15 | 3272   | 7F11z00 | Other induction of labour NOS                               |
| 16 | 44306  | L126600 | Eclampsia in labour                                         |
| 17 | 48708  | Z244411 | Postmature labour                                           |
| 18 | 95354  | Z255300 | Progress of second stage of labour                          |
| 19 | 62622  | L30z000 | Obstructed labour NOS, unspecified                          |
| 20 | 108419 | L38X.00 | Complication of anaesthesia during labour and deliv unsp    |
| 21 | 40702  | Z243600 | Slow progress in first stage of labour                      |
| 22 | 37267  | L301400 | Obstructed labour due to generally contracted pelvis        |
| 23 | 61611  | 7F1A400 | Trial of labour NEC                                         |
| 24 | 22261  | Z241100 | Onset of labour induced                                     |
| 25 | 65900  | Z243300 | Progress of labour - first stage                            |
| 26 | 32997  | 6321    | 1st stage of labour length                                  |
| 27 | 29071  | 7L16000 | Intravenous induction of labour                             |
| 28 | 54596  | L140200 | False labour at or after 37 completed weeks of gestation    |
| 29 | 42101  | L140z00 | Threatened premature labour NOS                             |
| 30 | 32877  | L350.00 | Ruptured uterus before labour                               |
| 31 | 107198 | L292000 | Unspecified maternal pyrexia during labour, unspecified     |
| 32 | 97907  | L29..00 | Other problems affecting labour                             |
| 33 | 819    | L30..00 | Obstructed labour                                           |
| 34 | 24447  | 7F25.13 | Monitoring during labour                                    |
| 35 | 73331  | Z246900 | Duration of second stage of labour                          |
| 36 | 21626  | 63E1.00 | Spontaneous onset of labour                                 |
| 37 | 100563 | L302000 | Obstructed labour caused by pelvic soft tissues unspecified |
| 38 | 23548  | L301.00 | Obstructed labour caused by bony pelvis                     |
| 39 | 104746 | L302z00 | Obstructed labour caused by pelvic soft tissues NOS         |
| 40 | 48602  | L32..00 | Long labour                                                 |
| 41 | 36655  | Z245.00 | Observation of blood loss in labour                         |
| 42 | 99170  | Z243.00 | Observation of first stage of labour                        |
| 43 | 25112  | Z241.00 | Labour established                                          |
| 44 | 56915  | Z249.00 | Labour problem                                              |
| 45 | 62656  | Z255400 | Rapid second stage of labour                                |
| 46 | 94396  | L30zz00 | Obstructed labour NOS                                       |
| 47 | 29529  | L351.00 | Rupture of uterus during and after labour                   |
| 48 | 102136 | L292z00 | Unspecified maternal pyrexia during labour NOS              |
| 49 |        |         |                                                             |
| 50 |        |         |                                                             |
| 51 |        |         |                                                             |
| 52 |        |         |                                                             |
| 53 |        |         |                                                             |
| 54 |        |         |                                                             |
| 55 |        |         |                                                             |
| 56 |        |         |                                                             |
| 57 |        |         |                                                             |
| 58 |        |         |                                                             |
| 59 |        |         |                                                             |
| 60 |        |         |                                                             |

|    |        |         |                                                              |
|----|--------|---------|--------------------------------------------------------------|
| 1  |        |         |                                                              |
| 2  |        |         |                                                              |
| 3  | 40080  | 7F11y00 | Other specified other induction of labour                    |
| 4  | 46297  | Z246311 | Onset of labour pains                                        |
| 5  | 60333  | L301500 | Obstructed labour due to pelvic inlet contraction            |
| 6  | 85226  | Lyu4000 | [X]Other failed induction of labour                          |
| 7  |        |         |                                                              |
| 8  | 103056 | Z244.00 | Observation of pattern of labour                             |
| 9  | 64548  | L281300 | Prem rupture of membranes onset of labour within 24 hours    |
| 10 | 68319  | L351300 | Rupture of uterus during/after labour with postnatal problem |
| 11 | 62278  | L281400 | Premature rupture of membranes, labour delayed by therapy    |
| 12 | 22613  | Z248.00 | Normal labour                                                |
| 13 | 90775  | Z246.00 | Observation of measures of labour                            |
| 14 | 70150  | Z246100 | Duration of labour                                           |
| 15 | 28928  | L140.00 | Threatened premature labour                                  |
| 16 | 93205  | Z255F00 | Not pushing well in labour                                   |
| 17 | 99660  | L300400 | Obstructed labour due to face presentation                   |
| 18 | 48274  | Q212200 | Liveborn with prelabour meconium in liquor                   |
| 19 | 59296  | L140000 | Threatened premature labour unspecified                      |
| 20 | 9294   | L292.00 | Maternal pyrexia during labour, unspecified                  |
| 21 | 28830  | Z242.00 | Labour not established                                       |
| 22 | 104206 | L29z000 | Problems affecting labour NOS unspecified                    |
| 23 | 28700  | 7F1..11 | Labour operations                                            |
| 24 | 30001  | L313.00 | Precipitate labour                                           |
| 25 | 104716 | Z255E11 | Pushing well in labour                                       |
| 26 | 98918  | Z247100 | Expulsion of IUCD during third stage of labour               |
| 27 | 62600  | L29zz00 | Problems affecting labour NOS                                |
| 28 | 364    | 7F13111 | Lower uterine segment caesarean section (LSCS) NEC           |
| 29 | 13315  | 14Y0.00 | Born by caesarean section                                    |
| 30 | 13316  | 14Y6.00 | Born by emergency caesarean section                          |
| 31 | 29155  | 7F1A000 | Caesarean hysterectomy                                       |
| 32 | 10049  | 7F12111 | Elective lower uterine segment caesarean section (LSCS)      |
| 33 | 12118  | 7F13300 | Emergency caesarean section                                  |
| 34 | 72513  | 7F13200 | Extraperitoneal caesarean section                            |
| 35 | 15361  | 14Y2.00 | Born by elective caesarean section                           |
| 36 | 8192   | Q473.00 | Other hypothermia of newborn                                 |
| 37 | 3007   | Q316.00 | Newborn transitory tachypnoea                                |
| 38 | 100616 | ZV30100 | [V]Singleton, born before admission to hospital              |
| 39 | 93976  | Qyu4200 | [X]Other bacterial sepsis of newborn                         |
| 40 | 56336  | Q40A100 | Sepsis of newborn due to Escherichia coli                    |
| 41 | 66999  | Q474111 | Newborn environmental hyperthermia                           |
| 42 | 15985  | ZV32.00 | [V]Twin, mate stillborn                                      |
| 43 | 59878  | Q463.00 | Transitory ileus of newborn                                  |
| 44 | 10452  | 6333    | Twins - both live born                                       |
| 45 | 93999  | 6339    | Triplets - 3 still born                                      |
| 46 | 99418  | Q482.00 | Central nervous system dysfunction in newborn NOS            |
| 47 | 41064  | Q484.00 | Newborn drug reaction and intoxication                       |
| 48 | 56888  | Q483000 | Newborn feeding problem, unspecified                         |
| 49 |        |         |                                                              |
| 50 |        |         |                                                              |
| 51 |        |         |                                                              |
| 52 |        |         |                                                              |
| 53 |        |         |                                                              |
| 54 |        |         |                                                              |
| 55 |        |         |                                                              |
| 56 |        |         |                                                              |
| 57 |        |         |                                                              |
| 58 |        |         |                                                              |
| 59 |        |         |                                                              |
| 60 |        |         |                                                              |

|    |        |         |                                                              |
|----|--------|---------|--------------------------------------------------------------|
| 1  |        |         |                                                              |
| 2  |        |         |                                                              |
| 3  |        |         |                                                              |
| 4  | 13304  | Q480.12 | Seizures in newborn                                          |
| 5  | 53052  | Q425.00 | Late anaemia of newborn due to isoimmunisation               |
| 6  | 98857  | ZV31200 | [V]Twin, not hospitalised, mate live born                    |
| 7  | 38852  | Q311300 | Aspiration of vomit in newborn                               |
| 8  |        |         |                                                              |
| 9  | 104697 | G520000 | Acute aseptic myocarditis of the newborn                     |
| 10 | 55878  | Q494.00 | Transient myocardial ischaemia of newborn                    |
| 11 | 108976 | 6318    | Born in hospital                                             |
| 12 | 19577  | Q417100 | Cerebellar (nontraum) and post fossa haemorrhage fet newborn |
| 13 | 108501 | Q484z00 | Newborn drug reaction or intoxication NOS                    |
| 14 | 88204  | ZV30000 | [V]Singleton, born in hospital                               |
| 15 | 98669  | Qyu4100 | [X]Sepsis/newborn due to other+unspecified staphylococcus    |
| 16 |        |         |                                                              |
| 17 | 15457  | Q482y00 | Other newborn abnormal cerebral signs                        |
| 18 | 21839  | Q480.11 | Fits in newborn                                              |
| 19 |        |         |                                                              |
| 20 | 12085  | Q404.11 | Umbilical stump infection of the newborn                     |
| 21 | 72669  | Q452.00 | Newborn disseminated intravascular coagulation               |
| 22 |        |         |                                                              |
| 23 | 20083  | Q450.00 | Haemorrhagic disease of the newborn                          |
| 24 | 38877  | R024z00 | [D]Jaundice (not of newborn) NOS                             |
| 25 | 8515   | Q31y111 | Cyanotic attacks of the newborn                              |
| 26 |        |         |                                                              |
| 27 | 110616 | 6338    | Triplets-1 live+ 2 still born                                |
| 28 | 57128  | 6336    | Triplets - all live born                                     |
| 29 | 21468  | ZV29100 | [V]Newborn receiving special care                            |
| 30 | 14813  | Q481.00 | Newborn cerebral irritability, unspecified                   |
| 31 |        |         |                                                              |
| 32 | 17482  | Q474211 | Thermal injury in newborn NEC                                |
| 33 | 47693  | Q40W.00 | Sepsis of newborn due to other+unspecified streptococci      |
| 34 | 98366  | Qyu4800 | [X]Sepsis of newborn due to other+unspecified streptococci   |
| 35 |        |         |                                                              |
| 36 | 23015  | 6334    | Twins - 1 still + 1 live born                                |
| 37 | 106918 | Q44X.00 | Trans disorder carbohydrate metab of fet and newborn unsp    |
| 38 | 57783  | Q417000 | Intracerebral (nontraumatic) haemorrhage of fet and newborn  |
| 39 | 9477   | Q483.00 | Feeding problems in newborn                                  |
| 40 |        |         |                                                              |
| 41 | 32703  | Q21z.12 | Hypoxia in newborn NOS                                       |
| 42 | 36071  | Q21z.11 | Anoxia in newborn NOS                                        |
| 43 | 70538  | Q475.00 | Oedema of newborn unspecified                                |
| 44 |        |         |                                                              |
| 45 | 13300  | Q477.00 | Newborn breast engorgement                                   |
| 46 | 56476  | Q482z00 | Central nervous system dysfunction in newborn NOS            |
| 47 | 34502  | 6335    | Twins - both still born                                      |
| 48 | 63044  | ZV31z00 | [V]Twin, mate liveborn, NOS                                  |
| 49 | 19579  | Q448.00 | Newborn late metabolic acidosis                              |
| 50 |        |         |                                                              |
| 51 | 90510  | Q44T.00 | Transitory metabolic disturbance of newborn, unspecified     |
| 52 | 64600  | Q042.00 | Fet newborn affect mat exposure to environml chem subs       |
| 53 |        |         |                                                              |
| 54 | 89262  | Q474z00 | Newborn temperature regulation disorder NOS                  |
| 55 | 73978  | Qyu3800 | [X]Other apnoea of newborn                                   |
| 56 | 22031  | Q40y200 | Septicaemia of newborn                                       |
| 57 |        |         |                                                              |
| 58 | 45750  | Q4z..13 | Newborn death                                                |
| 59 | 105039 | 44qW000 | Newborn blood spot screening                                 |
| 60 | 98938  | Qyu6C00 | [X]Transitory metabolic disturbance of newborn, unspecified  |

|    |        |         |                                                              |
|----|--------|---------|--------------------------------------------------------------|
| 1  |        |         |                                                              |
| 2  |        |         |                                                              |
| 3  |        |         |                                                              |
| 4  | 19585  | Q483200 | Slow feeding in newborn                                      |
| 5  | 55895  | Q474200 | Hyperthermia in newborn, unspecified                         |
| 6  | 31476  | 9114.11 | FP58 - newborn registration                                  |
| 7  | 68065  | 9114.12 | GP58 - newborn registration                                  |
| 8  |        |         |                                                              |
| 9  | 104239 | Q48F.00 | Hypoxic ischaemic encephalopathy of newborn                  |
| 10 | 69413  | ZV33000 | [V]Twin, unspecified, born in hospital                       |
| 11 | 54589  | D400700 | Acquired neutropenia in newborn                              |
| 12 | 26871  | Q318.00 | Primary sleep apnoea of newborn                              |
| 13 | 105139 | Qyu3700 | [X]Other and unspecified atelectasis of newborn              |
| 14 | 93859  | Qyu8400 | [X]Hypothermia of newborn, unspecified                       |
| 15 | 20478  | ZV27200 | [V]Twins, both live born                                     |
| 16 |        |         |                                                              |
| 17 | 42527  | Q42..11 | Isoimmunisation of newborn                                   |
| 18 | 98721  | P320011 | Newborn glaucoma                                             |
| 19 | 19947  | ZV31.00 | [V]Twin, mate live born                                      |
| 20 | 97799  | Qyu3900 | [X]Other specified respiratory conditions of newborn         |
| 21 |        |         |                                                              |
| 22 | 3613   | Q40A.00 | Sepsis of the newborn                                        |
| 23 |        |         |                                                              |
| 24 | 109480 | 44qW100 | Completion of newborn blood spot screening card              |
| 25 | 40296  | Q46X.00 | Intestinal obstruction of newborn, unspecified               |
| 26 |        |         |                                                              |
| 27 | 39165  | Q483100 | Newborn regurgitation of food                                |
| 28 | 3615   | Q436200 | Newborn physiological jaundice NOS                           |
| 29 | 72352  | Q474300 | Transitory fever of newborn                                  |
| 30 | 40867  | Q485100 | Withdrawal symptoms from therapeutic use of drugs in newborn |
| 31 | 61943  | Q483400 | Rumination in newborn                                        |
| 32 |        |         |                                                              |
| 33 | 5173   | Q421.11 | ABO isoimmunisation of the newborn                           |
| 34 | 5218   | 6316    | Born before arrival                                          |
| 35 |        |         |                                                              |
| 36 | 56210  | Q311100 | Aspiration of liquor or mucus in newborn                     |
| 37 | 109128 | Qyu5100 | [X]Other umbilical haemorrhages of newborn                   |
| 38 | 108994 | 13lf000 | Unborn child is cause for safeguarding concern               |
| 39 | 43366  | Q207011 | Phrenic nerve palsy in newborn                               |
| 40 | 52525  | Q462.00 | Newborn swallowing maternal blood - haematemesis/melaena     |
| 41 | 61729  | Q482100 | Coma in newborn                                              |
| 42 | 99425  | QyuA400 | [X]Disorder of muscle tone of newborn, unspecified           |
| 43 | 47446  | Q474000 | Newborn dehydration fever                                    |
| 44 | 44256  | 9Ea4.00 | Unborn child at risk physi/ment abnormal serious handicap    |
| 45 | 61800  | Q437z00 | Kernicterus of newborn NOS                                   |
| 46 |        |         |                                                              |
| 47 | 104301 | 13lv000 | Unborn child subject to child protection plan                |
| 48 | 34504  | Q485.00 | Newborn drug withdrawal syndrome                             |
| 49 |        |         |                                                              |
| 50 | 23876  | Q487.00 | Umbilical polyp of newborn                                   |
| 51 | 56909  | Q411200 | Intraventric (nontraumatic) haemorrhage grade 3 fet newborn  |
| 52 | 41053  | Q483z11 | Bottle feeding problem in the newborn                        |
| 53 | 95873  | Q446600 | Disturbances of potassium balance of newborn                 |
| 54 | 52577  | Q483500 | Underfeeding in newborn                                      |
| 55 |        |         |                                                              |
| 56 | 28758  | ZV29200 | [V]Newborn receiving intensive care                          |
| 57 | 47227  | ZV27300 | [V]Twins, one live born and one stillborn                    |
| 58 |        |         |                                                              |
| 59 | 38890  | ZV27400 | [V]Twins, both stillborn                                     |
| 60 |        |         |                                                              |

|    |        |         |                                                             |
|----|--------|---------|-------------------------------------------------------------|
| 1  |        |         |                                                             |
| 2  |        |         |                                                             |
| 3  |        |         |                                                             |
| 4  | 44238  | ZV31000 | [V]Twin, born in hospital, mate live born                   |
| 5  | 50017  | Q472.00 | Newborn cold injury syndrome                                |
| 6  | 101103 | Q214200 | Liveborn with meconium liquor, unspecified                  |
| 7  | 109703 | 41G4.00 | Newborn blood spot specimen received                        |
| 8  |        |         |                                                             |
| 9  | 98336  | Q311113 | Aspiration of amniotic fluid in newborn                     |
| 10 | 64262  | Q311112 | Aspiration of liquor in newborn                             |
| 11 | 36845  | Q311111 | Aspiration of mucus in newborn                              |
| 12 | 73521  | QyuA200 | [X]Other disorders of muscle tone of newborn                |
| 13 | 72705  | QyuA000 | [X]Oth specified disturbances of cerebral status of newborn |
| 14 | 57674  | Q411100 | Intraventric (nontraumatic) haemorrhage grade 2 fet newborn |
| 15 | 65792  | Q484000 | Grey syndrome of newborn                                    |
| 16 |        |         |                                                             |
| 17 | 68254  | Q474100 | Newborn environmental pyrexia                               |
| 18 | 19576  | Q31y600 | Apnoea of newborn                                           |
| 19 |        |         |                                                             |
| 20 | 97418  | Q30..12 | Pulmonary hypoperfusion syndrome of newborn                 |
| 21 | 108359 | ZV30200 | [V]Singleton, born outside hospital and not hospitalised    |
| 22 | 101529 | ZV32z00 | [V]Twin, mate stillborn, NOS                                |
| 23 |        |         |                                                             |
| 24 | 86001  | ZV32000 | [V]Twin, born in hospital, mate stillborn                   |
| 25 | 95736  | Qyu8000 | [X]Other hypothermia of newborn                             |
| 26 |        |         |                                                             |
| 27 | 48664  | Q444111 | Hypocalcaemic tetany in newborn                             |
| 28 | 11509  | Q483300 | Vomiting in newborn                                         |
| 29 | 99244  | Q446500 | Disturbances of sodium balance of newborn                   |
| 30 | 19578  | Q483600 | Overfeeding in newborn                                      |
| 31 |        |         |                                                             |
| 32 | 39691  | Q40A000 | Sepsis of newborn due to Staphylococcus aureus              |
| 33 | 93597  | Q311200 | Aspiration of blood in newborn                              |
| 34 | 72704  | Qyu3000 | [X]Other respiratory distress of newborn                    |
| 35 |        |         |                                                             |
| 36 | 94759  | Q214000 | Liveborn with abnormal heart beat, unspecified              |
| 37 | 103401 | Q466111 | Intestinal obstruction in newborn due to faecoliths         |
| 38 | 104825 | Q453.00 | Other newborn transient coagulation defect                  |
| 39 |        |         |                                                             |
| 40 | 47317  | Q483z00 | Newborn feeding problem NOS                                 |
| 41 | 53402  | Q483z12 | Breast feeding problem in the newborn                       |
| 42 | 110294 | QyuA100 | [X]Other feeding problems of newborn                        |
| 43 | 73036  | 6337    | Triples -2 live+ 1 still born                               |
| 44 |        |         |                                                             |
| 45 | 59694  | Q411000 | Intraventric (nontraumatic) haemorrhage grade 1 fet newborn |
| 46 | 20005  | Q480.00 | Convulsions in newborn                                      |
| 47 | 26682  | Q404.00 | Omphalitis of the newborn                                   |
| 48 |        |         |                                                             |
| 49 | 37044  | Q450.11 | Vitamin K deficiency of the newborn                         |
| 50 | 25091  | Z23AP00 | Premature uterine contraction                               |
| 51 | 102737 | L112300 | Premature separation of placenta with coagulation defect    |
| 52 | 53829  | L281z00 | Premature rupture of membranes NOS                          |
| 53 |        |         |                                                             |
| 54 | 424    | L281.00 | Premature rupture of membranes                              |
| 55 | 108033 | Lyu3D00 | [X]Other premature separation of placenta                   |
| 56 | 69713  | L281000 | Premature rupture of membranes unspecified                  |
| 57 |        |         |                                                             |
| 58 | 59452  | L264000 | Intrauterine death unspecified                              |
| 59 | 4697   | Q10z.11 | Intrauterine growth retardation                             |
| 60 | 1413   | L264.00 | Intrauterine death                                          |



|    |        |         |                                                              |
|----|--------|---------|--------------------------------------------------------------|
| 1  |        |         |                                                              |
| 2  |        |         |                                                              |
| 3  | 89588  | 7E0A600 | Intrauterine insemination without superovulation donor sperm |
| 4  | 37831  | L264z00 | Intrauterine death NOS                                       |
| 5  | 111544 | 7E0A500 | Intrauterine insemination without superovulat partner sperm  |
| 6  | 48471  | PF6D200 | Intrauterine amputation of lower limb                        |
| 7  | 91652  | 7E0A300 | Intrauterine insemination superovulation partner sperm       |
| 8  | 88271  | 7E0A400 | Intrauterine insemination superovulation using donor sperm   |
| 9  | 36694  | Q21..11 | Intrauterine hypoxia                                         |
| 10 | 9542   | L265311 | Maternal care for intrauterine growth retardation            |
| 11 | 57522  | Q451y11 | Neonatal thrombocytopenia due to platelet alloimmunisation   |
| 12 | 44062  | A984000 | Neonatal gonococcal conjunctivits                            |
| 13 | 41151  | Q406611 | Neonatal viral dacryocystitis or conjunctivitis              |
| 14 | 45852  | Q406613 | Neonatal conjunctivitis due to virus                         |
| 15 | 18439  | 44qW.00 | Neonatal screening test                                      |
| 16 | 63783  | Q407y00 | Other specified neonatal candida infection                   |
| 17 | 71752  | Q457000 | Neonatal isoimmune neutropenia                               |
| 18 | 30795  | Q492.00 | Neonatal hypertension                                        |
| 19 | 109861 | Q444100 | Other neonatal hypocalcaemia                                 |
| 20 | 53387  | 14I6.00 | H/O: neonatal abstinence syndrome                            |
| 21 | 13297  | Q447.00 | Neonatal hypoglycaemia                                       |
| 22 | 110197 | Q44y.00 | Other transitory neonatal endocrine and metabolic problem    |
| 23 | 95112  | Q407511 | Neonatal monilial septicaemia                                |
| 24 | 31315  | Q41..11 | Neonatal haemorrhage                                         |
| 25 | 11629  | 2FX..00 | O/E - Umbilical stump - neonatal                             |
| 26 | 99830  | Q446y00 | Other specified transitory neonatal electrolyte disturbance  |
| 27 | 52572  | Q406300 | Neonatal dacryocystitis or conjunctivitis due to E.Coli      |
| 28 | 67105  | Q446300 | Transitory neonatal hyperkalaemia                            |
| 29 | 73994  | Q406400 | Neonatal dacryocystitis/conjunctivitis due to staphylococcus |
| 30 | 32722  | 9kJ..00 | Neonatal check - enhanced services administration            |
| 31 | 18991  | 313K.00 | Neonatal hearing test                                        |
| 32 | 100646 | 67AD.00 | Neonatal feeding education                                   |
| 33 | 37782  | F251100 | Neonatal myoclonic epilepsy                                  |
| 34 | 70045  | Q45y.00 | Other specified transient neonatal blood disorder            |
| 35 | 13302  | Q407.12 | Neonatal thrush                                              |
| 36 | 40123  | Q407.11 | Neonatal monilia                                             |
| 37 | 72350  | Q451y00 | Other specified transient neonatal thrombocytopenia          |
| 38 | 97518  | Q451z00 | Transient neonatal thrombocytopenia NOS                      |
| 39 | 48202  | Q48A.00 | Neonatal cerebral leukomalacia                               |
| 40 | 29743  | Q407000 | Neonatal candidiasis of mouth                                |
| 41 | 29715  | Q406.00 | Neonatal dacryocystitis and conjunctivitis                   |
| 42 | 55492  | Q447000 | Iatrogenic neonatal hypoglycaemia                            |
| 43 | 69813  | Q407z00 | Neonatal candida infection NOS                               |
| 44 | 8069   | Q433A00 | Neonatal jaundice from breast milk inhibitor                 |
| 45 | 3211   | Q433200 | Breast feeding inhibitors causing neonatal jaundice          |
| 46 | 7818   | Q31y500 | Neonatal snuffles                                            |
| 47 | 26686  | Q485200 | Neonatal Abstinence Syndrome                                 |
| 48 |        |         |                                                              |
| 49 |        |         |                                                              |
| 50 |        |         |                                                              |
| 51 |        |         |                                                              |
| 52 |        |         |                                                              |
| 53 |        |         |                                                              |
| 54 |        |         |                                                              |
| 55 |        |         |                                                              |
| 56 |        |         |                                                              |
| 57 |        |         |                                                              |
| 58 |        |         |                                                              |
| 59 |        |         |                                                              |
| 60 |        |         |                                                              |

|    |        |         |                                                             |
|----|--------|---------|-------------------------------------------------------------|
| 1  |        |         |                                                             |
| 2  |        |         |                                                             |
| 3  |        |         |                                                             |
| 4  | 17940  | F4F5400 | Neonatal nasolacrimal duct obstruction                      |
| 5  | 64472  | Q44V.00 | Neonatal goitre, not elsewhere classified                   |
| 6  | 32327  | Q406712 | Neonatal conjunctivitis due to chlamydiae                   |
| 7  | 94578  | Q457z00 | Transient neonatal neutropenia NOS                          |
| 8  | 46817  | Q446200 | Transitory neonatal hyponatraemia                           |
| 9  | 93307  | Q41y400 | Neonatal rectal haemorrhage                                 |
| 10 | 72370  | J004400 | Neonatal enamel hypoplasia                                  |
| 11 | 93210  | Q446z00 | Transitory neonatal electrolyte disturbance NOS             |
| 12 | 36127  | Q406412 | Neonatal conjunctivitis due to staphylococcus               |
| 13 | 26678  | Q406411 | Neonatal dacryocystitis due to staphylococcus               |
| 14 | 21472  | Q441.00 | Neonatal diabetes mellitus                                  |
| 15 | 48010  | Q443.00 | Neonatal thyrotoxicosis                                     |
| 16 | 39055  | 9kJ0.00 | Neonatal check - enhanced service completed                 |
| 17 | 15487  | Q407100 | Neonatal candidiasis of perineum                            |
| 18 | 28292  | Q405.00 | Neonatal infective mastitis                                 |
| 19 | 16482  | Q407.00 | Neonatal candida infection                                  |
| 20 | 2240   | Q4z..12 | Neonatal death                                              |
| 21 | 109658 | Qyu5300 | [X]Other neonatal gastrointestinal haemorrhage              |
| 22 | 53603  | Q48C.00 | Neonatal hypotension                                        |
| 23 | 17496  | Q31y511 | Neonatal sniffles                                           |
| 24 | 48638  | Q433800 | Neonatal jaundice with porphyria                            |
| 25 | 28341  | Q48y600 | Early neonatal death                                        |
| 26 | 44358  | Q44y000 | Transitory neonatal tyrosinaemia                            |
| 27 | 63759  | Q406y00 | Other specified neonatal dacryocystitis or conjunctivitis   |
| 28 | 23422  | Q406100 | Neonatal conjunctivitis                                     |
| 29 | 51913  | Q41y300 | Neonatal melaena                                            |
| 30 | 38485  | 7L13000 | Neonatal exchange blood transfusion                         |
| 31 | 35727  | Q407200 | Neonatal candidiasis of other skin                          |
| 32 | 49769  | ZV29000 | [V]Normal level of neonatal care                            |
| 33 | 45303  | Q433000 | Delayed conjugation causing neonatal jaundice, unspecified  |
| 34 | 55360  | Q433z00 | Delayed conjugation causing neonatal jaundice NOS           |
| 35 | 30742  | F13z500 | Benign neonatal sleep myoclonus                             |
| 36 | 21164  | Q48y411 | Neonatal 'craniotabes'                                      |
| 37 | 56614  | Q488.00 | Neonatal cerebral ischaemia                                 |
| 38 | 104194 | 2L...00 | Neonatal examination                                        |
| 39 | 38163  | Q46y100 | Neonatal diarrhoea                                          |
| 40 | 45444  | Q457.00 | Transient neonatal neutropenia                              |
| 41 | 36564  | Q48y700 | Late neonatal death                                         |
| 42 | 45012  | Q44U.00 | Transitory neonatal endocrine disorder, unspecified         |
| 43 | 49516  | Q414300 | Neonatal vaginal haemorrhage                                |
| 44 | 27845  | Q446000 | Neonatal dehydration                                        |
| 45 | 93156  | Q433y11 | Neonatal jaundice - deficiency enzyme for bilirubin conjug. |
| 46 | 65686  | Q444.12 | Neonatal hypoparathyroidism                                 |
| 47 | 72347  | Q406800 | Neonatal dacryocystitis/conjunctivitis-other inclusion body |
| 48 | 72494  | Q406812 | Neonatal conjunctivitis due to other inclusion body         |
| 49 |        |         |                                                             |
| 50 |        |         |                                                             |
| 51 |        |         |                                                             |
| 52 |        |         |                                                             |
| 53 |        |         |                                                             |
| 54 |        |         |                                                             |
| 55 |        |         |                                                             |
| 56 |        |         |                                                             |
| 57 |        |         |                                                             |
| 58 |        |         |                                                             |
| 59 |        |         |                                                             |
| 60 |        |         |                                                             |

|    |        |                                                                      |
|----|--------|----------------------------------------------------------------------|
| 1  |        |                                                                      |
| 2  |        |                                                                      |
| 3  |        |                                                                      |
| 4  | 43576  | Q406811 Neonatal dacryocystitis due to other inclusion body          |
| 5  | 27962  | Q311400 Neonatal aspiration of milk and regurgitated food            |
| 6  | 24792  | Q31y611 Neonatal apnoeic attack                                      |
| 7  | 106500 | Q44A.00 Neonatal hypoparathyroidism                                  |
| 8  |        |                                                                      |
| 9  | 27793  | Q406700 Neonatal dacryocystitis or conjunctivitis due to chlamydiae  |
| 10 | 35507  | Q433.00 Other neonatal jaundice - delayed conjugation other cause    |
| 11 | 58833  | Q433700 Neonatal jaundice with congenital hypothyroidism             |
| 12 | 47909  | Q449.00 Neonatal tetany without calcium or magnesium deficiency      |
| 13 |        |                                                                      |
| 14 | 71056  | Q433y00 Delayed conjugation causing neonatal jaundice OS             |
| 15 | 37776  | Q446100 Transitory neonatal hypernatraemia                           |
| 16 | 91557  | Q406z00 Neonatal dacryocystitis or conjunctivitis NOS                |
| 17 |        |                                                                      |
| 18 | 23566  | Q490.00 Neonatal cardiac failure                                     |
| 19 | 35477  | Qyu5A00 [X]Neonatal jaundice from other+unspcf hepatocellular damage |
| 20 | 28361  | Q436100 Transient neonatal hyperbilirubinaemia                       |
| 21 | 48869  | Qyu5900 [X]Neonatal jaundice due/other specifd excessive haemolysis  |
| 22 |        |                                                                      |
| 23 | 64999  | Q406200 Neonatal dacryocystitis                                      |
| 24 | 55634  | Q442.00 Neonatal myasthenia gravis                                   |
| 25 | 18578  | Q47y200 Neonatal skin infection                                      |
| 26 |        |                                                                      |
| 27 | 20894  | Q444.00 Neonatal hypocalcaemia                                       |
| 28 | 37953  | Q444z00 Neonatal hypocalcaemia NOS                                   |
| 29 | 55689  | Q407500 Neonatal candida septicaemia                                 |
| 30 |        |                                                                      |
| 31 | 104225 | Q434100 Giant cell hepatitis causing neonatal jaundice               |
| 32 | 39574  | Q406512 Neonatal conjunctivitis due to other bacteria                |
| 33 | 37045  | Q406511 Neonatal dacryocystitis due to other bacteria                |
| 34 | 68264  | Q406600 Neonatal dacryocystitis or conjunctivitis due to virus       |
| 35 |        |                                                                      |
| 36 | 54971  | Q446.00 Other transitory neonatal electrolyte disturbance            |
| 37 | 66985  | Q433600 Neonatal jaundice with Gilbert's syndrome                    |
| 38 | 39164  | Q430000 Neonatal jaundice + glucose-6-phosphate dehydrogenase defic. |
| 39 | 99435  | N000500 Neonatal lupus erythematosus                                 |
| 40 |        |                                                                      |
| 41 | 6097   | Q40y100 Neonatal urinary tract infection                             |
| 42 | 40869  | Qyu5B00 [X]Neonatal jaundice from other specified causes             |
| 43 | 57203  | Q445.00 Neonatal hypomagnesaemia                                     |
| 44 |        |                                                                      |
| 45 | 106854 | Q451100 Trans neonatal thrombocyto due to idopath matern thrombocyto |
| 46 | 54169  | Q491.00 Neonatal cardiac dysrhythmia                                 |
| 47 | 105058 | Qyu3300 [X]Other neonatal aspiration syndromes                       |
| 48 | 109912 | Qyu6200 [X]Other neonatal hypocalcaemia                              |
| 49 |        |                                                                      |
| 50 | 49462  | Q41y200 Neonatal haematemesis                                        |
| 51 | 110458 | Q32..00 Neonatal respiratory distress syndrome                       |
| 52 | 13301  | Q478.00 Neonatal erythema toxicum                                    |
| 53 |        |                                                                      |
| 54 | 94612  | Q433500 Neonatal jaundice with Dubin-Johnson syndrome                |
| 55 | 7475   | ZV29212 [V]Neonatal care on NNU                                      |
| 56 | 47540  | ZV29211 [V]Neonatal care on ITU                                      |
| 57 |        |                                                                      |
| 58 | 68708  | Q406311 Neonatal dacryocystitis due to E.Coli                        |
| 59 | 89700  | Q406312 Neonatal conjunctivitis due to E.coli                        |
| 60 | 71441  | Q451.00 Transient neonatal thrombocytopenia                          |

|    |        |         |                                                              |
|----|--------|---------|--------------------------------------------------------------|
| 1  |        |         |                                                              |
| 2  |        |         |                                                              |
| 3  |        |         |                                                              |
| 4  | 63790  | Q46y000 | Neonatal peritonitis NOS                                     |
| 5  | 72975  | Qyu6000 | [X]Other neonatal hypoglycaemia                              |
| 6  | 96590  | 67AD.11 | Neonatal feeding advice                                      |
| 7  | 90526  | Q444011 | Neonatal cows' milk hypocalcaemia                            |
| 8  | 71986  | Q446400 | Transitory neonatal hypokalaemia                             |
| 9  | 71532  | Q406500 | Neonatal dacryocystitis/conjunctivitis due to other bacteria |
| 10 | 6883   | Q317000 | Perinatal bronchopulmonary dysplasia                         |
| 11 | 94812  | Qyu3A00 | [X]Oth cardiovascular disorders originating/perinatal period |
| 12 | 54248  | Q415.00 | Perinatal adrenal haemorrhage                                |
| 13 | 21461  | Q4...00 | Other perinatal conditions                                   |
| 14 | 45002  | Q412.00 | Perinatal subarachnoid haemorrhage                           |
| 15 | 87844  | 7F2A000 | Obstetric umbilical artery Doppler                           |
| 16 | 41899  | L240000 | Congenital abnormality of uterus affecting obstetric care    |
| 17 | 25731  | Z27..00 | Obstetric investigative observation                          |
| 18 | 101334 | 8HQ2000 | Referral for obstetric ultrasound scan                       |
| 19 | 32913  | Z28..00 | Obstetric pelvic observation                                 |
| 20 | 34677  | 7F23000 | Immed repair obstetric laceration of uterus or cervix uteri  |
| 21 | 58517  | L244012 | Rectocele affecting obstetric care                           |
| 22 | 29087  | 7F25z00 | Obstetric monitoring NOS                                     |
| 23 | 35601  | 7F23z00 | Immediate repair of obstetric laceration NOS                 |
| 24 | 13700  | ZL5D100 | Referral to obstetrician                                     |
| 25 | 13317  | Z7...00 | Obstetric examination                                        |
| 26 | 110628 | L43y.11 | Fat embolism - obstetric                                     |
| 27 | 34046  | 7F2..00 | Other obstetric operations                                   |
| 28 | 60507  | L35z000 | Obstetric trauma NOS, unspecified                            |
| 29 | 56727  | 5392    | Obstetric X-ray - placenta                                   |
| 30 | 59623  | L35..00 | Other obstetric trauma                                       |
| 31 | 52679  | L417.00 | Obstetric cerebral venous thrombosis                         |
| 32 | 13039  | L383.00 | Obstetric toxic reaction to local anaesthesia                |
| 33 | 20907  | L244011 | Cystocele affecting obstetric care                           |
| 34 | 72298  | L355.00 | Other obstetric pelvic organ damage                          |
| 35 | 102027 | L35yz00 | Other obstetric trauma NOS                                   |
| 36 | 34210  | L240011 | Bicornuate uterus affecting obstetric care                   |
| 37 | 85951  | 7F28z00 | Other non routine obstetric scan NOS                         |
| 38 | 34086  | 7Fz..00 | Obstetric operations NOS                                     |
| 39 | 67257  | L35y.00 | Other obstetric trauma OS                                    |
| 40 | 39036  | 7F...00 | Obstetric operations                                         |
| 41 | 11268  | 7F23.12 | Immediate suture of obstetric laceration                     |
| 42 | 59059  | L433.12 | Septic obstetric embolism                                    |
| 43 | 14970  | 7F23100 | Immed repair obstetric laceration perineum & anal sphincter  |
| 44 | 68557  | L353000 | Obstetric laceration of cervix unspecified                   |
| 45 | 73797  | L353z00 | Obstetric laceration of cervix NOS                           |
| 46 | 101752 | L391000 | Obstetric shock unspecified                                  |
| 47 | 85244  | 7F2B.00 | Obstetric ultrasound monitoring                              |
| 48 | 95698  | 7F28y00 | Other specified other non routine obstetric scan             |
| 49 |        |         |                                                              |
| 50 |        |         |                                                              |
| 51 |        |         |                                                              |
| 52 |        |         |                                                              |
| 53 |        |         |                                                              |
| 54 |        |         |                                                              |
| 55 |        |         |                                                              |
| 56 |        |         |                                                              |
| 57 |        |         |                                                              |
| 58 |        |         |                                                              |
| 59 |        |         |                                                              |
| 60 |        |         |                                                              |

|    |        |         |                                                              |
|----|--------|---------|--------------------------------------------------------------|
| 1  |        |         |                                                              |
| 2  |        |         |                                                              |
| 3  | 54473  | L244000 | Other uterine/pelvic floor abnormal affecting obstetric care |
| 4  | 85245  | 7F26z00 | Routine obstetric scan NOS                                   |
| 5  | 55573  | 8HJ7.00 | Obstetric self-referral                                      |
| 6  | 88229  | 7F2A.00 | Obstetric Doppler studies                                    |
| 7  | 78449  | 7F28.00 | Other non routine obstetric scan                             |
| 8  | 68966  | Lyu7.00 | [X]Other obstetric conditions, not elsewhere classified      |
| 9  | 105817 | 9381    | Obstetric coop card issued                                   |
| 10 | 93136  | L241000 | Tumour of uterine body affecting obstetric care              |
| 11 | 86011  | 7F26.00 | Routine obstetric scan                                       |
| 12 | 35558  | 584..12 | U-S scan - obstetric, diagn.                                 |
| 13 | 55750  | L353.00 | Obstetric laceration of cervix                               |
| 14 | 65231  | 9384    | Obstetric coop card updated                                  |
| 15 | 106154 | 7F2Ay00 | Other specified obstetric Doppler studies                    |
| 16 | 109880 | 7F2Az11 | Obstetric doppler ultrasound NOS                             |
| 17 | 48200  | 8HMN.00 | Listed for Obstetric admission                               |
| 18 | 51929  | L354.11 | High vaginal laceration - obstetric                          |
| 19 | 34843  | L352.11 | Inversion of uterus - obstetric                              |
| 20 | 44286  | ZL1C200 | Under care of obstetrician                                   |
| 21 | 4797   | 5842    | U-S obstetric scan normal                                    |
| 22 | 49661  | 7Fy..00 | Other specified obstetric operations                         |
| 23 | 47156  | L357.00 | Obstetric trauma causing pelvic haematoma                    |
| 24 | 26698  | 27Z..00 | Obstetric examination NOS                                    |
| 25 | 104979 | L354z00 | Obstetric high vaginal laceration NOS                        |
| 26 | 94444  | L352z00 | Obstetric inversion of uterus NOS                            |
| 27 | 2382   | 584Z.00 | U-S obstetric diagn. scan NOS                                |
| 28 | 71742  | L354000 | Obstetric high vaginal laceration unspecified                |
| 29 | 20826  | L241011 | Uterine fibroid affecting obstetric care                     |
| 30 | 13318  | 271..11 | O/E - fundus size - obstetric                                |
| 31 | 94059  | 7F2Az00 | Obstetric Doppler studies NOS                                |
| 32 | 28730  | L355.11 | Bladder injury - obstetric                                   |
| 33 | 27916  | L353.12 | Tear of cervix - obstetric                                   |
| 34 | 86021  | 7F24.00 | Other obstetric operations                                   |
| 35 | 22929  | 8H3C.00 | Non-urgent obstetric admission                               |
| 36 | 105146 | 7F2Ay11 | Other specified obstetric doppler ultrasound                 |
| 37 | 69458  | L354.00 | Obstetric high vaginal laceration                            |
| 38 | 33352  | L352.00 | Obstetric inversion of uterus                                |
| 39 | 23800  | 7F23.11 | Immediate repair of obstetric tear                           |
| 40 | 29685  | 5843    | U-S obstetric scan abnormal                                  |
| 41 | 70607  | 7F23300 | Immediate repair of minor obstetric laceration               |
| 42 | 24655  | 8H27.00 | Admit obstetric emergency                                    |
| 43 | 106067 | L246000 | Other cervical abnormality affecting obstetric care          |
| 44 | 53094  | 7F25y00 | Other specified obstetric monitoring                         |
| 45 | 98057  | L248000 | Vulval abnormality affecting obstetric care                  |
| 46 | 36959  | L391.00 | Obstetric shock                                              |
| 47 | 17911  | L416.11 | Piles - obstetric                                            |
| 48 |        |         |                                                              |
| 49 |        |         |                                                              |
| 50 |        |         |                                                              |
| 51 |        |         |                                                              |
| 52 |        |         |                                                              |
| 53 |        |         |                                                              |
| 54 |        |         |                                                              |
| 55 |        |         |                                                              |
| 56 |        |         |                                                              |
| 57 |        |         |                                                              |
| 58 |        |         |                                                              |
| 59 |        |         |                                                              |
| 60 |        |         |                                                              |

|    |        |         |                                                            |
|----|--------|---------|------------------------------------------------------------|
| 1  |        |         |                                                            |
| 2  |        |         |                                                            |
| 3  | 19800  | 584..00 | Ultrasound in obstetric diagn.                             |
| 4  | 62012  | 7F2z.00 | Other obstetric operations NOS                             |
| 5  | 60870  | 938Z.00 | Obstetric coop card NOS                                    |
| 6  | 20591  | 539..00 | Abdominal obstetric X-ray                                  |
| 7  | 23169  | 539Z.00 | Abdominal obstetric X-ray NOS                              |
| 8  | 98639  | L43zz00 | Obstetric pulmonary embolism NOS                           |
| 9  | 101944 | L43z000 | Obstetric pulmonary embolism NOS, unspecified              |
| 10 | 34533  | 8HV6.00 | Private referral to obstetrician                           |
| 11 | 35197  | 8HLN.00 | Obstetric D.V. done                                        |
| 12 | 104205 | 7F2A100 | Obstetric uterine artery Doppler                           |
| 13 | 102802 | 7F2By00 | Other specified obstetric ultrasound monitoring            |
| 14 | 12625  | 7F25.00 | Obstetric monitoring                                       |
| 15 | 57891  | 7F23.00 | Immediate repair of obstetric laceration                   |
| 16 | 54582  | L35zz00 | Obstetric trauma NOS                                       |
| 17 | 13965  | 584..13 | Ultra-sound scan - obstetric                               |
| 18 | 96343  | 7F26y00 | Other specified routine obstetric scan                     |
| 19 | 100451 | 7F24100 | Obstetric uterine tamponade                                |
| 20 | 27019  | 5841    | U-S obstetric scan requested                               |
| 21 | 87848  | 7F2Bz00 | Obstetric ultrasound monitoring NOS                        |
| 22 | 91278  | L357000 | Obstetric pelvic haematoma unspecified                     |
| 23 | 36340  | 938..00 | Obstetric coop card                                        |
| 24 | 19327  | L411.11 | Perineal obstetric varicose veins                          |
| 25 | 20496  | L411.12 | Vulval obstetric varicose veins                            |
| 26 | 27650  | L384.00 | Obstetric spinal and epidural anaesthesia-induced headache |
| 27 | 107037 | Lyu4C00 | [X]Other specified obstetric trauma                        |
| 28 | 43628  | L247011 | Septate vagina affecting obstetric care                    |
| 29 | 11988  | 8H57.00 | Obstetric referral                                         |
| 30 | 11204  | 271..12 | O/E - uterus size - obstetric                              |
| 31 | 48311  | Z261.00 | Observation of gestational sac                             |
| 32 | 43004  | Q13..00 | Light for gestational age                                  |
| 33 | 22385  | Z22C300 | Length of gestation                                        |
| 34 | 91915  | 7M0f400 | From 9 weeks to <14 weeks gestational age                  |
| 35 | 50704  | Q113.00 | Light for gestational age                                  |
| 36 | 69250  | L169000 | Herpes gestationis unspecified                             |
| 37 | 59681  | L41z511 | Gestational phlebitis NOS                                  |
| 38 | 34265  | L16C000 | Gestational proteinuria                                    |
| 39 | 60330  | L19..00 | Complications specific to multiple gestation               |
| 40 | 34505  | 62X3.00 | Full term gestation - 40 weeks                             |
| 41 | 90884  | 7M0f200 | 9 - 13 weeks gestational age                               |
| 42 | 29565  | L161.13 | Gestational oedema                                         |
| 43 | 102435 | 8CE0000 | Gestational diabetes information leaflet given             |
| 44 | 34484  | 62X1.00 | Gestation = 24 weeks                                       |
| 45 | 49663  | Z261100 | Gestational sac present                                    |
| 46 | 7515   | L169.00 | Herpes gestationis                                         |
| 47 | 37201  | L16C100 | Gestational oedema with proteinuria                        |
| 48 |        |         |                                                            |
| 49 |        |         |                                                            |
| 50 |        |         |                                                            |
| 51 |        |         |                                                            |
| 52 |        |         |                                                            |
| 53 |        |         |                                                            |
| 54 |        |         |                                                            |
| 55 |        |         |                                                            |
| 56 |        |         |                                                            |
| 57 |        |         |                                                            |
| 58 |        |         |                                                            |
| 59 |        |         |                                                            |
| 60 |        |         |                                                            |

|        |         |                                              |
|--------|---------|----------------------------------------------|
| 50081  | L41z512 | Gestational phlebopathy NOS                  |
| 58971  | L41z513 | Gestational thrombosis NOS                   |
| 16975  | L21..11 | Gestation - multiple                         |
| 97682  | 7M0fy00 | Other specified gestational age              |
| 95702  | 7M0f300 | Under 9 weeks gestational age                |
| 108013 | ZC2CB00 | Dietary advice for gestational diabetes      |
| 26556  | 62X2.00 | Gestation >24 weeks                          |
| 26555  | 62X0.00 | Gestation <24 weeks                          |
| 111075 | Qyu1200 | [X]Other 'heavy for gestational age' infants |
| 86327  | 7M0f000 | Over 20 weeks gestational age                |
| 91101  | 7M0fz00 | Gestational age NOS                          |
| 103954 | 62X5.00 | Length of gestation at time of test          |
| 2664   | L180900 | Gestational diabetes mellitus                |
| 95703  | 7M0f100 | 14 - 20 weeks gestational age                |
| 8446   | L180811 | Gestational diabetes mellitus                |
| 40703  | L169z00 | Herpes gestationis NOS                       |
| 43805  | Z22C312 | Duration of gestation                        |
| 18810  | 62X..00 | Length of gestation                          |
| 103090 | Lyu3000 | [X]Other multiple gestation                  |
| 55352  | 7M0f.00 | Gestational age                              |
| 21526  | L123500 | Gestational hypertension                     |

| colour | condition             | time frame          |
|--------|-----------------------|---------------------|
| green  | pregnancy             | 7/12 mths           |
| blue   | birth                 | <21 days postpartum |
| yellow | abortion/ miscarriage | <5 days             |

#### Appendix 4: Additional CPRD browser pregnancy medcodes

| Medcode | Readcode | Readterm                                                     |
|---------|----------|--------------------------------------------------------------|
| 6298    | ZV28.00  | [V]Antenatal screening                                       |
| 94405   | L413100  | Antenatal deep vein thrombosis - delivered                   |
| 99188   | L173.00  | Maternal tuberculosis in pregnancy/childbirth/puerperium     |
| 63781   | L410z00  | Varicose veins of legs in pregnancy and puerperium NOS       |
| 45870   | Ly...00  | Complications of pregnancy,childbirth or the puerperium OS   |
| 52106   | L412z00  | Superficial thrombophlebitis in pregnancy and puerperium NOS |
| 86991   | L172000  | Other maternal venereal disease, unspec pregnancy/puerperium |
| 4243    | L466.00  | Galactorrhoea in pregnancy and the puerperium                |
| 70092   | L460.00  | Retracted nipple in pregnancy, the puerperium or lactation   |

|        |         |                                                              |
|--------|---------|--------------------------------------------------------------|
| 16995  | L462.00 | Breast engorgement in pregnancy, the puerperium or lactation |
| 59573  | L176500 | Viral hepatitis comp pregnancy, childbirth & the puerperium  |
| 88361  | L248.11 | Persistent hymen in pregnancy, childbirth and the puerperium |
| 31610  | L248.13 | Vulval abnormality in pregnancy/childbirth/puerperium        |
| 92998  | Lyu1.00 | [X]Oedema,proteinuria+hypertens in pregnancy,childbrth,puerp |
| 20597  | 12G4.00 | FH: Multiple pregnancy                                       |
| 28446  | Lz...00 | Complications of pregnancy,childbirth and the puerperium NOS |
| 63835  | L247z11 | Septate vagina in pregnancy/childbirth/puerperium NOS        |
| 109550 | L416400 | Haemorrhoids in pregnancy and puerperium with p/n comp       |
| 59276  | L032.00 | Ovarian pregnancy                                            |
| 65579  | L415.00 | Other phlebitis and thrombosis in pregnancy and puerperium   |
| 93143  | L121.00 | Renal hypertension in pregnancy/childbirth/puerperium        |
| 60154  | L24..00 | Pelvic soft tissue abnormality in pregnancy/childbirth/puerp |
| 71717  | L121100 | Renal hypertension in pregnancy/childbirth/puerp - delivered |
| 24006  | L466100 | Galactorrhoea in pregnancy and the puerperium - delivered    |
| 44069  | L18..00 | Other medical condition in pregnancy/childbirth/puerperium   |
| 47918  | L090300 | Salpingitis following abortive pregnancy                     |
| 11152  | L...00  | Complications of pregnancy, childbirth and the puerperium    |
| 63644  | L181z00 | Thyroid dysfunction in pregnancy/childbirth/puerperium NOS   |
| 96004  | L183z00 | Drug dependence during pregnancy/childbirth/puerperium NOS   |
| 1771   | L182.00 | Anaemia during pregnancy, childbirth and the puerperium      |
| 46744  | L41..00 | Venous complications of pregnancy and the puerperium         |
| 90329  | L416z00 | Haemorrhoids in pregnancy and the puerperium NOS             |
| 41050  | Z2...00 | Pregnancy, childbirth and puerperium observations            |
| 39550  | L244z11 | Cystocele in pregnancy, childbirth or the puerperium NOS     |
| 64147  | L244z12 | Rectocele in pregnancy, childbirth or the puerperium NOS     |
| 15297  | L461400 | Cracked nipple in pregnancy/puerperium/lactation + p/n comp  |
| 73717  | L463300 | Other breast disorder in pregnancy/puerperium/lact +a/n comp |
| 98264  | L165200 | Asymptomatic bacteriuria in pregnancy - del with p/n comp    |
| 53310  | L1z..00 | Complications of pregnancy/childbirth/puerperium NOS         |
| 103144 | L416300 | Haemorrhoids in pregnancy and puerperium with a/n comp       |
| 46756  | L184.00 | Mental disorders in pregnancy, childbirth and the puerperium |
| 26023  | L411300 | VV's of perineum/vulva in pregnancy/puerperium + a/n comp    |
| 58140  | L173000 | Maternal tuberculosis,unspec whether in pregnancy/puerperium |
| 73089  | L460000 | Retracted nipple in pregnancy/puerperium/lactation unspec    |
| 67006  | L096400 | Pulmonary embolism following abortive pregnancy              |
| 65085  | L092000 | Bladder damage following abortive pregnancy                  |
| 23840  | L090z00 | Septicaemia NOS following abortive pregnancy                 |
| 51359  | L090200 | Pelvic peritonitis following abortive pregnancy              |
| 106097 | L09y.00 | Other specified complication following abortive pregnancy    |
| 12604  | L120.00 | Benign essential hypertension in pregnancy/childbirth/puerp  |



|    |        |         |                                                              |
|----|--------|---------|--------------------------------------------------------------|
| 1  |        |         |                                                              |
| 2  |        |         |                                                              |
| 3  |        |         |                                                              |
| 4  | 103683 | 8Hki.00 | Referral to teenage pregnancy and parenting support service  |
| 5  | 42091  | L411z00 | Varicose veins of perineum/vulva in pregnancy/puerperium NOS |
| 6  | 96437  | L170000 | Maternal syphilis, unspec whether in pregnancy or puerperium |
| 7  |        |         |                                                              |
| 8  | 20850  | L244.11 | Cystocele in pregnancy, childbirth and the puerperium        |
| 9  | 35903  | L244.12 | Pendulous abdomen in pregnancy,childbirth and the puerperium |
| 10 | 39492  | L244.13 | Rectocele in pregnancy, childbirth and the puerperium        |
| 11 | 71943  | L411000 | VV's of perineum/vulva in pregnancy/puerperium unspecified   |
| 12 | 93583  | L096.00 | Embolism following abortive pregnancy                        |
| 13 | 34182  | 1547    | H/O: medical termination of pregnancy                        |
| 14 | 70422  | L093400 | Uraemia following abortive pregnancy                         |
| 15 |        |         |                                                              |
| 16 | 103222 | L248z11 | Persistent hymen in pregnancy/childbirth/puerperium NOS      |
| 17 | 97296  | L461200 | Cracked nipple in pregnancy/puerp/lact - deliv + p/n comp    |
| 18 | 5541   | 1544    | H/O: ectopic pregnancy                                       |
| 19 | 58982  | L186.00 | Other cardiovascular diseases in pregnancy/childbirth/puerp  |
| 20 | 62886  | L461z00 | Cracked nipple in pregnancy, the puerperium or lactation NOS |
| 21 | 41473  | L183.00 | Drug dependence in pregnancy, childbirth and the puerperium  |
| 22 | 48552  | L010.11 | Anembryonic pregnancy                                        |
| 23 | 33634  | L182z00 | Anaemia during pregnancy/childbirth/puerperium NOS           |
| 24 | 64384  | L180z00 | Diabetes mellitus in pregnancy/childbirth/puerperium NOS     |
| 25 | 25759  | L411.00 | VV's of perineum/vulva in pregnancy/puerperium               |
| 26 | 38556  | 67A7.00 | Pregnancy dental advice                                      |
| 27 | 41718  | L1y..00 | Complications of pregnancy/childbirth/puerperium OS          |
| 28 | 53056  | L246.11 | Polyp of cervix in pregnancy, childbirth and the puerperium  |
| 29 | 73557  | L188z00 | Abnormal GTT in pregnancy/childbirth/puerperium NOS          |
| 30 | 69012  | L466300 | Galactorrhoea in pregnancy/puerperium with a/n complication  |
| 31 | 57131  | L462100 | Breast engorgement in pregnancy/puerperium/lactation - deliv |
| 32 | 64260  | L18D.00 | Dis nervous syst complic pregnancy,childbirth and puerperium |
| 33 | 59493  | L090400 | Salpingo-oophoritis following abortive pregnancy             |
| 34 | 104656 | Ly2..00 | Sequelae of complication pregnancy childbirth and puerperium |
| 35 | 16046  | L410.00 | Varicose veins of legs in pregnancy and the puerperium       |
| 36 | 72215  | L241z00 | Uterine body tumour in pregnancy/childbirth/puerperium NOS   |
| 37 | 13245  | 12G2.00 | FH: Diabetes in pregnancy                                    |
| 38 | 106736 | 9mK1.00 | Pertussis vaccination in pregnancy invitation second letter  |
| 39 | 66537  | L170100 | Maternal syphilis during pregnancy - baby delivered          |
| 40 | 92415  | L095.00 | Shock following abortive pregnancy                           |
| 41 | 35273  | L097.00 | Readmission for abortive pregnancy (NHS codes)               |
| 42 | 20152  | L090y00 | Sepsis NOS following abortion/ectopic/molar pregnancy        |
| 43 | 50009  | L461100 | Cracked nipple in pregnancy/puerperium/lactation - delivered |
| 44 | 71162  | L16y100 | Other pregnancy complication - delivered                     |
| 45 | 102635 | 8Cg..00 | Pregnancy termination care                                   |
| 46 | 104806 | L463100 | Other breast disorder in pregnancy/puerperium/lact - deliv   |
| 47 |        |         |                                                              |
| 48 |        |         |                                                              |
| 49 |        |         |                                                              |
| 50 |        |         |                                                              |
| 51 |        |         |                                                              |
| 52 |        |         |                                                              |
| 53 |        |         |                                                              |
| 54 |        |         |                                                              |
| 55 |        |         |                                                              |
| 56 |        |         |                                                              |
| 57 |        |         |                                                              |
| 58 |        |         |                                                              |
| 59 |        |         |                                                              |
| 60 |        |         |                                                              |

|    |        |         |                                                              |
|----|--------|---------|--------------------------------------------------------------|
| 1  |        |         |                                                              |
| 2  |        |         |                                                              |
| 3  |        |         |                                                              |
| 4  | 63319  | L096.11 | Embolus following abortive pregnancy                         |
| 5  | 94527  | L16y400 | Other pregnancy complication with postnatal complication     |
| 6  | 9170   | L12..00 | Hypertension complicating pregnancy/childbirth/puerperium    |
| 7  | 73432  | L18z100 | Medical condition NOS during pregnancy - baby delivered      |
| 8  | 104466 | L179.00 | HIV disease complicating pregnancy childbirth puerperium     |
| 9  | 47197  | L410400 | Varicose veins of legs in pregnancy/puerperium + p/n comp    |
| 10 | 54761  | L170.00 | Maternal syphilis in pregnancy/childbirth/puerperium         |
| 11 | 63773  | L416100 | Haemorrhoids in pregnancy and the puerperium - delivered     |
| 12 | 101499 | L246z12 | Stenosis of cervix in pregnancy/childbirth/puerperium NOS    |
| 13 | 33255  | L246z11 | Polyp of cervix in pregnancy/childbirth/puerperium NOS       |
| 14 | 56542  | L240z11 | Bicornuate uterus in pregnancy, childbirth or puerperium NOS |
| 15 | 41016  | L247.11 | Septate vagina in pregnancy, childbirth and the puerperium   |
| 16 | 40262  | L247.13 | Vaginal abnormality in pregnancy/childbirth/puerperium       |
| 17 | 6478   | L188.00 | Abnormal glucose tolerance test in pregnancy/childb/puerp    |
| 18 | 59910  | L17z.00 | Maternal infect/parasitic dis NOS in pregnancy/childb/puerp  |
| 19 | 62052  | L092500 | Uterus damage following abortive pregnancy                   |
| 20 | 97836  | L242100 | Uterine operation scar in pregnancy/childbirth/puerp - deliv |
| 21 | 99889  | L16A200 | Glycosuria during pregnancy - delivered with p/n comp        |
| 22 | 98981  | L166400 | Genitourinary tract infection in pregnancy with p/n comp     |
| 23 | 59601  | L462200 | Breast engorgement in pregnancy/puerp/lact - del + p/n comp  |
| 24 | 16017  | L166100 | Genitourinary tract infection in pregnancy - delivered       |
| 25 | 10205  | ZG9..00 | Advice relating to pregnancy and fertility                   |
| 26 | 105500 | L41yz00 | Other venous complication of pregnancy and puerperium NOS    |
| 27 | 41283  | L187.00 | Orthopaedic disorders in pregnancy/childbirth/puerperium     |
| 28 | 63379  | L183100 | Drug dependence during pregnancy - baby delivered            |
| 29 | 38871  | L246.00 | Other cervical abnormality in pregnancy/childbirth/puerp     |
| 30 | 47686  | L181.00 | Thyroid dysfunction in pregnancy/childbirth/puerperium       |
| 31 | 23691  | L172.00 | Other venereal diseases in pregnancy/childbirth/puerperium   |
| 32 | 107197 | L170z00 | Maternal syphilis in pregnancy/childbirth/puerperium NOS     |
| 33 | 68215  | L188100 | Abnormal GTT during pregnancy - baby delivered               |
| 34 | 40723  | L12z.00 | Unspecified hypertension in pregnancy/childbirth/puerperium  |
| 35 | 104542 | 67AH.00 | Education about toxoplasmosis precautions during pregnancy   |
| 36 | 97741  | L461000 | Cracked nipple in pregnancy/puerperium/lactation unspecified |
| 37 | 67035  | L123200 | Transient hypertension of pregnancy - deliv with p/n comp    |
| 38 | 64125  | L09yz00 | Other specified complication NOS follow abortive pregnancy   |
| 39 | 57640  | L242z00 | Uterine operation scar in pregnancy/childbirth/puerp NOS     |
| 40 | 2924   | 7E06600 | Hysterotomy and termination of pregnancy                     |
| 41 | 27952  | ZV13900 | [V]PH comp of pregnancy, childbirth and the puerperium       |
| 42 | 53141  | L241.00 | Tumour of uterine body in pregnancy/childbirth/puerperium    |
| 43 | 35928  | L463000 | Other breast disorder in pregnancy/puerperium/lact unspec    |
| 44 | 40121  | 12G1.00 | FH: Raised B.P. in pregnancy                                 |
| 45 |        |         |                                                              |
| 46 |        |         |                                                              |
| 47 |        |         |                                                              |
| 48 |        |         |                                                              |
| 49 |        |         |                                                              |
| 50 |        |         |                                                              |
| 51 |        |         |                                                              |
| 52 |        |         |                                                              |
| 53 |        |         |                                                              |
| 54 |        |         |                                                              |
| 55 |        |         |                                                              |
| 56 |        |         |                                                              |
| 57 |        |         |                                                              |
| 58 |        |         |                                                              |
| 59 |        |         |                                                              |
| 60 |        |         |                                                              |

|    |        |         |                                                              |
|----|--------|---------|--------------------------------------------------------------|
| 1  |        |         |                                                              |
| 2  |        |         |                                                              |
| 3  |        |         |                                                              |
| 4  | 11359  | L180.00 | Diabetes mellitus during pregnancy/childbirth/puerperium     |
| 5  | 33708  | L182100 | Anaemia during pregnancy - baby delivered                    |
| 6  | 58686  | L462000 | Breast engorgement in pregnancy/puerperium/lactation unspec  |
| 7  | 6560   | L416.00 | Haemorrhoids in pregnancy and the puerperium                 |
| 8  | 98133  | 9Ea0.00 | Risk life pregnant woman greater than if pregnancy terminatd |
| 9  | 32950  | L03y100 | Cornual pregnancy                                            |
| 10 | 105006 | Q48G.00 | Complication termination pregnancy affecting fetus newborn   |
| 11 | 107708 | L415100 | Other phlebitis/thrombosis in pregnancy/puerperium - deliv   |
| 12 | 28225  | L240.11 | Bicornuate uterus in pregnancy, childbirth and puerperium    |
| 13 | 49789  | L240.12 | Double uterus in pregnancy, childbirth and the puerperium    |
| 14 | 56217  | L416000 | Haemorrhoids in pregnancy and the puerperium unspecified     |
| 15 | 99154  | L410000 | Varicose veins of legs in pregnancy/puerperium unspecified   |
| 16 | 96724  | L162100 | Unspecified renal disease in pregnancy - delivered           |
| 17 | 101260 | L10z100 | Early pregnancy haemorrhage NOS - delivered                  |
| 18 | 35859  | 67A5.00 | Pregnancy alcohol advice                                     |
| 19 | 42598  | L175.00 | Maternal rubella in pregnancy, childbirth and the puerperium |
| 20 | 72437  | L248z00 | Vulval abnormality in pregnancy/childbirth/puerperium NOS    |
| 21 | 101272 | L462300 | Breast engorgement in pregnancy/puerperium/lact + a/n comp   |
| 22 | 92362  | L240z00 | Congenital abnormality uterus in pregnancy/childb/puerp NOS  |
| 23 | 63362  | L091100 | Defibrination syndrome following abortive pregnancy          |
| 24 | 73311  | L41z.00 | Venous complications of pregnancy and puerperium NOS         |
| 25 | 34639  | L180100 | Diabetes mellitus during pregnancy - baby delivered          |
| 26 | 43754  | L18z.00 | Medical condition NOS in pregnancy/childbirth/puerperium     |
| 27 | 30948  | L150100 | Post-term pregnancy - delivered                              |
| 28 | 73647  | L188000 | Abnormal GTT - unspec whether during pregnancy/puerperium    |
| 29 | 54681  | L189.00 | Dis resp syst comp pregnancy, childbirth & puerperium        |
| 30 | 99365  | L460z00 | Retracted nipple in pregnancy/puerperium/lactation NOS       |
| 31 | 64649  | L175100 | Maternal rubella during pregnancy - baby delivered           |
| 32 | 28611  | L461.00 | Cracked nipple in pregnancy, the puerperium or lactation     |
| 33 | 61144  | L463.00 | Other breast disorder in pregnancy/puerperium/lactation      |
| 34 | 50571  | L090100 | Parametritis following abortive pregnancy                    |
| 35 | 70342  | L123400 | Transient hypertension of pregnancy + postnatal complication |
| 36 | 99422  | L187000 | Orthopaedic disorder - unsp whether in pregnancy/puerperium  |
| 37 | 32007  | L090.00 | Genital or pelvic infection following abortive pregnancy     |
| 38 | 45242  | L241.11 | Uterine fibroids in pregnancy, childbirth and the puerperium |
| 39 | 7270   | 12G4.11 | FH: Twin pregnancy                                           |
| 40 | 38440  | L462z00 | Breast engorgement in pregnancy/puerperium/lactation NOS     |
| 41 | 89557  | L092300 | Cervix damage following abortive pregnancy                   |
| 42 | 41961  | L171.00 | Maternal gonorrhoea during pregnancy/childbirth/puerperium   |
| 43 | 50908  | L242.00 | Uterine scar from previous surgery in pregnancy/childb/puerp |
| 44 | 16752  | ZV72900 | [V]Pregnancy examination and test                            |
| 45 |        |         |                                                              |
| 46 |        |         |                                                              |
| 47 |        |         |                                                              |
| 48 |        |         |                                                              |
| 49 |        |         |                                                              |
| 50 |        |         |                                                              |
| 51 |        |         |                                                              |
| 52 |        |         |                                                              |
| 53 |        |         |                                                              |
| 54 |        |         |                                                              |
| 55 |        |         |                                                              |
| 56 |        |         |                                                              |
| 57 |        |         |                                                              |
| 58 |        |         |                                                              |
| 59 |        |         |                                                              |
| 60 |        |         |                                                              |

|        |         |                                                              |
|--------|---------|--------------------------------------------------------------|
| 14765  | L462400 | Breast engorgement in pregnancy/puerperium/lact + p/n comp   |
| 15633  | L182000 | Anaemia - unspecified whether in pregnancy or the puerperium |
| 73757  | L247z00 | Vaginal abnormality in pregnancy/childbirth/puerperium NOS   |
| 99389  | L460300 | Retracted nipple in pregnancy/puerperium/lact with a/n comp  |
| 24303  | 9Ea..00 | Reason for termination of pregnancy                          |
| 55757  | L16y200 | Other pregnancy complication - delivered with postnatal comp |
| 67635  | L180000 | Diabetes mellitus - unspec whether in pregnancy/puerperium   |
| 51639  | L241z11 | Uterine fibroid in pregnancy/childbirth/puerperium NOS       |
| 40978  | Z22A700 | Surrogate pregnancy                                          |
| 18944  | 7E07011 | Dilation cervix uteri & curettage for termination pregnancy  |
| 54107  | L10z000 | Early pregnancy haemorrhage NOS unspecified                  |
| 103610 | 9NkN.00 | Seen in early pregnancy unit                                 |
| 70476  | L132100 | Late pregnancy vomiting - delivered                          |
| 23456  | L412.00 | Superficial thrombophlebitis in pregnancy and the puerperium |
| 67377  | L463z00 | Other breast disorder in pregnancy/puerperium/lactation NOS  |
| 94736  | L096600 | Septic embolism following abortive pregnancy                 |
| 94353  | L175000 | Maternal rubella, unspecified whether pregnancy/puerperium   |
| 64127  | L121000 | Renal hypertension in pregnancy/childbirth/puerp unspecified |
| 99594  | L415000 | Other phlebitis/thrombosis in pregnancy/puerperium unsp      |
| 50093  | L093000 | Oliguria following abortive pregnancy                        |
| 28312  | L466z00 | Galactorrhoea in pregnancy and the puerperium NOS            |
| 72944  | L176.00 | Other maternal viral dis. in pregnancy/childbirth/puerperium |
| 49390  | L174.00 | Maternal malaria in pregnancy, childbirth and the puerperium |
| 97629  | L246z00 | Other cervical abnormality in pregnancy/childbirth/puerp NOS |
| 57419  | L167100 | Liver disorder in pregnancy - delivered                      |
| 73927  | L175z00 | Maternal rubella in pregnancy/childbirth/puerperium NOS      |
| 54089  | L466000 | Galactorrhoea in pregnancy and the puerperium unspecified    |
| 94718  | L121z00 | Renal hypertension in pregnancy/childbirth/puerperium NOS    |
| 105918 | L09y400 | Urinary tract infection following abortive pregnancy         |
| 30326  | L090000 | Endometritis following abortive pregnancy                    |
| 38022  | Z22CF00 | Date symptom of pregnancy first noted                        |
| 69703  | L185100 | Congenital cardiovasc dis in pregnancy - baby delivered      |
| 69911  | L18zz00 | Medical condition NOS in pregnancy/childb/puerp NOS          |
| 35680  | Q423.00 | Hydrops fetalis due to isoimmunisation                       |
| 59296  | L140000 | Threatened premature labour unspecified                      |

# BMJ Open

## Trends in HIV testing in the UK Primary Care setting: A 15 year retrospective cohort study 2000 to 2015

|                                 |                                                                                                                                                                                                                                                                                                                                                                                                                                                                                                                                                                                                                                                                                                                                                                                                                                                                                                                                                                                   |
|---------------------------------|-----------------------------------------------------------------------------------------------------------------------------------------------------------------------------------------------------------------------------------------------------------------------------------------------------------------------------------------------------------------------------------------------------------------------------------------------------------------------------------------------------------------------------------------------------------------------------------------------------------------------------------------------------------------------------------------------------------------------------------------------------------------------------------------------------------------------------------------------------------------------------------------------------------------------------------------------------------------------------------|
| Journal:                        | <i>BMJ Open</i>                                                                                                                                                                                                                                                                                                                                                                                                                                                                                                                                                                                                                                                                                                                                                                                                                                                                                                                                                                   |
| Manuscript ID                   | bmjopen-2018-027744.R2                                                                                                                                                                                                                                                                                                                                                                                                                                                                                                                                                                                                                                                                                                                                                                                                                                                                                                                                                            |
| Article Type:                   | Research                                                                                                                                                                                                                                                                                                                                                                                                                                                                                                                                                                                                                                                                                                                                                                                                                                                                                                                                                                          |
| Date Submitted by the Author:   | 22-May-2019                                                                                                                                                                                                                                                                                                                                                                                                                                                                                                                                                                                                                                                                                                                                                                                                                                                                                                                                                                       |
| Complete List of Authors:       | Gompels, Mark; North Bristol NHS Trust, Department of Immunology, Southmead Hospital<br>Michael, Skevi; University of Bristol, School of Mathematics<br>Davies, Charlotte; University of Bristol, Department of Population Health Sciences, Bristol Medical School<br>Jones, Tim; University of Bristol; University Hospitals Bristol NHS Foundation Trust, The National Institute for Health Research Collaboration for Leadership in Applied Health Research and Care West (NIHR CLAHRC West)<br>Macleod, John; University of Bristol, Population Health Sciences, Bristol Medical School; University of Bristol, The National Institute of Health Research Health Protection Research Unit (NIHR HPRU) in Evaluation of Interventions<br>May, Margaret; University of Bristol, Population Health Sciences, Bristol Medical School; University of Bristol, The National Institute of Health Research Health Protection Research Unit (NIHR HPRU) in Evaluation of Interventions |
| <b>Primary Subject Heading</b>: | General practice / Family practice                                                                                                                                                                                                                                                                                                                                                                                                                                                                                                                                                                                                                                                                                                                                                                                                                                                                                                                                                |
| Secondary Subject Heading:      | HIV/AIDS, Infectious diseases, Public health, Sexual health                                                                                                                                                                                                                                                                                                                                                                                                                                                                                                                                                                                                                                                                                                                                                                                                                                                                                                                       |
| Keywords:                       | PRIMARY CARE, HIV & AIDS < INFECTIOUS DISEASES, HIV testing, CPRD                                                                                                                                                                                                                                                                                                                                                                                                                                                                                                                                                                                                                                                                                                                                                                                                                                                                                                                 |
|                                 |                                                                                                                                                                                                                                                                                                                                                                                                                                                                                                                                                                                                                                                                                                                                                                                                                                                                                                                                                                                   |

SCHOLARONE™  
Manuscripts

1  
2  
3  
4  
5 **Trends in HIV testing in the UK Primary Care setting: A 15 year retrospective cohort study 2000 to**  
6 **2015**  
7

8 M Gompels<sup>1</sup>, S Michael<sup>2</sup>, C F Davies<sup>3</sup>, T Jones<sup>3,4</sup>, John MacLeod<sup>3,5</sup>, M T May<sup>3,5</sup>  
9

10 Version:14/05/2019  
11

12 <sup>1</sup> Dr Mark Gompels: Consultant HIV, Department of Immunology, Southmead Hospital, North Bristol  
13 NHS Trust, UK. Email: [Mark.Gompels@nbt.nhs.uk](mailto:Mark.Gompels@nbt.nhs.uk)  
14

15 <sup>2</sup> Dr Skevi Michael: Senior Teaching Associate, School of Mathematics, University of Bristol, UK.  
16 Email: [Skevi.Michael@bristol.ac.uk](mailto:Skevi.Michael@bristol.ac.uk)  
17

18 <sup>3</sup> Dr Charlotte F Davies: Senior Research Associate, Department of Population Health Sciences,  
19 Bristol Medical School, University of Bristol, UK. Email: [Charlotte.Davies@bristol.ac.uk](mailto:Charlotte.Davies@bristol.ac.uk)  
20

21 <sup>3,4</sup> Dr Timothy Jones: Senior Research Associate, Department of Population Health Sciences, Bristol  
22 Medical School, University of Bristol, UK and The National Institute for Health Research  
23 Collaboration for Leadership in Applied Health Research and Care West (NIHR CLAHRC West) at  
24 University Hospitals Bristol NHS Foundation Trust, Bristol, UK. Email: [Timothy.Jones@bristol.ac.uk](mailto:Timothy.Jones@bristol.ac.uk)  
25

26 <sup>3,5</sup> Professor John Macleod, Professor of Clinical Epidemiology and Primary Care, Department of  
27 Population Health Sciences, Bristol Medical School, University of Bristol, UK and The National  
28 Institute of Health Research Health Protection Research Unit (NIHR HPRU) in Evaluation of  
29 Interventions at University of Bristol, Bristol, UK. Email: [John.Macleod@bristol.ac.uk](mailto:John.Macleod@bristol.ac.uk)  
30

31 <sup>3,5</sup> Professor Margaret T May, Professor of Medical Statistics, Department of Population Health  
32 Sciences, Bristol Medical School, University of Bristol, UK and The National Institute of Health  
33 Research Health Protection Research Unit (NIHR HPRU) in Evaluation of Interventions at University  
34 of Bristol, Bristol, UK. Email: [Margaret.may@bristol.ac.uk](mailto:Margaret.may@bristol.ac.uk)  
35  
36  
37  
38  
39  
40  
41  
42  
43

44 **Corresponding author:**  
45  
46  
47  
48

49 Dr. Charlotte F. Davies  
50 Department of Population Health Sciences  
51 Bristol Medical School  
52 University of Bristol  
53 Bristol  
54 BS8 2PS  
55 UK Telephone: +44 117 9287209  
56  
57 Fax: +44 117 928 7325  
58  
59 [charlotte.davies@bristol.ac.uk](mailto:charlotte.davies@bristol.ac.uk)  
60

1  
2  
3 Word Count: abstract 300, words 4656, 4 tables, 2 figures, 50 references, 1 supplementary figure, 2  
4 supplementary tables, 1 web supplementary file (appendices 1-4)  
5  
6  
7  
8  
9  
10  
11  
12  
13  
14  
15  
16  
17  
18  
19  
20  
21  
22  
23  
24  
25  
26  
27  
28  
29  
30  
31  
32  
33  
34  
35  
36  
37  
38  
39  
40  
41  
42  
43  
44  
45  
46  
47  
48  
49  
50  
51  
52  
53  
54  
55  
56  
57  
58  
59  
60

For peer review only

**Abstract 300**

**Objectives:** To estimate trends in HIV testing, positivity and prevalence in UK Primary Care for 2000-2015 as part of a wider investigation into reasons for late diagnosis of HIV.

**Design:** Retrospective cohort study using the Clinical Practice Research Datalink (CPRD) which is derived from computerised clinical records produced during consultations in Primary Care.

**Setting:** 404 General Practices in England.

**Participants:** 5,979,598 adults aged  $\geq 16$  years registered between 2000-2015 with 45,093,761 person years of observation.

**Outcomes:** Annual HIV testing rates, proportion of positive tests, and prevalence of HIV-infected people recorded in Primary Care 2000-2015.

**Results:** HIV testing in Primary Care increased from 2000 to 2010, but then declined. Testing was higher in females than males and in those aged 16-44 years compared with older adults. Rates per 100,000 in women aged 16-44 years were 177 (95% CI 167-188); 1309 (1282-1336); 1789 (1757-1821) and 839 (817-862) in 2000, 2005, 2010 and 2015, respectively, and for non-pregnant women: 22.5 (19-26); 134 (125-143); 262 (250-275); 190 (179, 201). For men aged 16-44 years rates were: 26 (22-29); 107 (100-115); 196 (185-206); 137 (127-146). Over the study period, there were approximately 2 positive results per 1000 HIV tests. Men were eight-fold more likely to test positive than women. The percentage of HIV diagnoses among adults recorded in CPRD may be as low as 55% in London and 67% in the rest of the UK.

**Conclusions:** HIV testing rates in Primary Care peaked in 2010 and subsequently declined. Access to testing was higher for women despite the prevalence of HIV being higher in men.

**Implications and further research needed:**

Opportunities remain in Primary Care for increasing HIV testing to prevent costly late diagnoses and decrease HIV transmission. Interventions to improve targeting of tests and increase adherence to HIV testing guidelines are needed in Primary Care.



## Article summary

### Strengths and limitations of this study

- We investigated trends in HIV testing in Primary Care using high quality data from the Clinical Practice Research Datalink (CPRD) which is derived from computerised clinical records produced during consultations in Primary Care in England.
- CPRD provided anonymised Primary Care records on patients registered between 2000 and 2015 in 404 primary care practices in England which is likely to be representative of the general patient population.
- A limitation of the study is that not all General Practices contribute data to CPRD and therefore we cannot know whether the sample was representative.
- A major strength of the study was the large number of patients, nearly 6 million, which allowed us to contrast trends in HIV testing rates in Primary Care by sex, age, deprivation, rural/urban location and whether in London or not.
- Data were available for 15 years of follow up allowing us to show that HIV testing in Primary Care in England increased between 2000 and 2010, but then declined up to 2015.

## Introduction

HIV testing in Primary Care is an important component of the strategy to diagnose HIV earlier and reduce transmission of HIV. In 2015 there were an estimated 89,800 (95% credible interval (CrI) 87,100-94,800) people living with HIV (PLWHIV) in England of whom approximately 15% (CrI 12-19%) were unaware of their infection<sup>1</sup>. Of those individuals newly diagnosed with HIV in 2015, 39% were diagnosed late, defined as having a CD4 count below 350 cells/mL within three months of diagnosis.<sup>2</sup> An estimated 1 in 4 of newly diagnosed individuals experienced a missed opportunity for an earlier diagnosis within the healthcare system in the preceding year.<sup>3</sup> Late diagnosis of HIV is associated with increased hospitalisations, decreased life expectancy,<sup>4-7</sup> and higher treatment and care costs to the NHS.<sup>8</sup> Importantly, individuals with undiagnosed HIV are likely to be responsible for the majority of transmissions because successfully treated individuals are unlikely to infect others.<sup>9</sup> Enhanced HIV testing is considered to be cost-effective in areas with a local diagnosed HIV prevalence that exceeds 2 per 1000 in adults aged 15-59 years.<sup>2,10</sup> In these high HIV prevalence areas recommendations are an HIV test should be routinely offered to all new GP registrations, those undergoing tests for other sexually transmitted infections or having blood tests for any reason, and all new hospital medical admissions.<sup>2,11</sup> However, the majority of people with HIV seek medical care for a related condition several times prior to their HIV diagnosis.<sup>12,13</sup> This may be presenting to general practice or hospital care. But without a high degree of clinical suspicion, the diagnosis is often missed.<sup>14</sup> BHIVA has published a list of indicator diseases which are more commonly found in those who are HIV positive than negative.<sup>15</sup> HIV testing is recommended in these cases, but recent surveys suggest poor adherence to guidelines.<sup>16,17</sup> Given the increase in HIV prevalence over time we would expect that there would be an increase in GP testing for HIV.

Evidence from systematic reviews shows that there are often many barriers to testing experienced by patients and equally by the healthcare providers (HCP).<sup>18-20</sup> Patients presenting with clinical indicator conditions to their General Practitioner (GP) provide a valuable opportunity to diagnose HIV and avoid hospitalisations due to late diagnosis.<sup>21</sup> Research has shown that the majority of patients (up to 75%) newly diagnosed with HIV had been seen in the healthcare system within the 12 months prior to their diagnosis resulting in a missed opportunity to test.<sup>12,14,22</sup> <sup>23</sup>Opt out HIV testing has been shown to be feasible, acceptable and cost effective in eight pilot studies conducted in community, primary and secondary care settings in high prevalence areas across England <sup>24</sup>.

1  
2  
3 However, no recent evidence is available to know if HIV testing in Primary Care has been increasing  
4 and guidelines have been implemented over the country and not just in high risk areas.<sup>16,17</sup>  
5  
6  
7

8 HIV testing in Primary Care has been reported only for the years 1995 to 2005 using data from the  
9 UK General Practice Research Database (GPRD).<sup>25</sup> This study showed that testing in Primary Care  
10 remained low, but increased steadily. Our main objective was to analyse data from the same source  
11 collected between the years 2000 to 2015 to study if HIV testing trends continued to increase in  
12 primary care over this extended time period. In addition we investigated differences in HIV testing  
13 rates and HIV diagnosis by demographic characteristics and estimated the prevalence of HIV  
14 recorded in primary care and compared it with estimates from national surveillance.  
15  
16  
17  
18  
19  
20

## 21 **Methods**

### 22 ***Population and data***

23 We used data from the Clinical Practice Research Datalink (CPRD), previously known as the General  
24 Practice Research Database (GPRD), which is derived from computerised clinical records produced  
25 during consultations in Primary Care. CPRD provided anonymised Primary Care records on patients  
26 registered between 2000 and 2015 in 404 primary care practices in England. Data were available on  
27 nearly 6 million people aged over 16 years old who are broadly representative of the adult UK  
28 population<sup>26</sup>. General Practitioners (GP) enter data on tests, diagnoses and symptoms using Read  
29 codes which are a hierarchical alphanumeric system similar to, but more extensive than  
30 International Classification of Disease (ICD) codes. The list of Read codes used to identify (1) HIV  
31 tests<sup>25</sup> (2) HIV diagnoses<sup>25</sup> (3) pregnancy/delivery/abortion<sup>27</sup> and (4) additional CPRD browser  
32 pregnancy medcodes are listed as appendices 1 to 4, respectively, in the supplementary file. We  
33 used individual level quintiles of the Index of Multiple Deprivation, 2015<sup>28</sup>. Practices were classified  
34 as rural, urban conurbation, or city/town at lower super output level (a small area geographic  
35 boundary of around 1,500 people) in England based on Office for National Statistics classifications,  
36 2011<sup>29</sup>, and as within or outside London. Ethnicity was grouped as Asian, Black African, Black  
37 Caribbean, Other, White, and unknown based on linked Hospital Episode Statistics data.  
38 We used national surveillance data from Public Health England (PHE) on testing in Primary Care  
39 derived from general practices that submit HIV tests to laboratories participating in the Sentinel  
40 Surveillance of Blood Borne Virus Testing (SSBBV). These practices cover 35% of England's Primary  
41 Care population. HIV testing data is captured from 66% of the Primary Care population in extremely  
42 high prevalence areas (>5 /1000), 37% within high prevalence areas (>2/1000) and 29% within low  
43 prevalence areas. These data exclude any point of care tests (POCTs) carried out by GPs, and tests  
44  
45  
46  
47  
48  
49  
50  
51  
52  
53  
54  
55  
56  
57  
58  
59  
60

1  
2  
3 carried out as part of antenatal screening. The latest data available on testing rates and positivity  
4 were for 2015<sup>30</sup>. Data on HIV prevalence were derived from the HIV and AIDS Reporting System  
5 (HARS) and for earlier years the Survey of Prevalent HIV Infections Diagnosed (SOPHID) available  
6 from PHE.<sup>2</sup> These data were available up to 2015.  
7  
8  
9

### 10 11 **Patient and Public Involvement**

12  
13 Public and Patients were not involved in the design of this study. Patient data from General Practices  
14 were contributed via CPRD and PHE surveillance as stated above.  
15  
16

### 17 18 **Statistical methods**

#### 19 *HIV testing rate, positivity and prevalence of HIV recorded in primary care*

20  
21 Using data from CPRD we estimated the HIV testing rates for each year between 2000-2015, overall  
22 and by patient demographics. Testing rates were estimated for males and females, for all ages and  
23 grouped by age (16-44,  $\geq 45$  years - chosen to match the study by Evans et al<sup>25</sup>). We also estimated  
24 rates separately according to whether the practice was in London or not, and by type of location. For  
25 each calendar year, the denominator used to calculate the HIV testing rate was the number of patients  
26 who were in the CPRD cohort in that year satisfying the following inclusion criteria:  
27  
28  
29

- 30  
31 (i) they were registered before the 30<sup>th</sup> June of that year  
32  
33 (ii) they did not transfer to another practice or die before the 30<sup>th</sup> June of that year  
34  
35 (iii) they were in the same practice for at least six months  
36  
37 (iv) they had not previously tested positive for HIV.  
38

39  
40 The numerator was the number of HIV tests carried out within the relevant year. For each patient in  
41 the denominator, the number of tests was calculated, disregarding repeat tests that were within a 3  
42 month period. Any test done or registered more than 90 days after the first recorded positive test was  
43 ignored.  
44

45  
46 As the majority of HIV tests in women are carried out as part of antenatal screening, analyses for  
47 females were repeated excluding these tests. We identified women who were pregnant using either  
48 delivery dates or Read codes as follows:  
49

- 50  
51 (i) Delivery (birth) dates associated with the females in our data: An HIV test was considered ante-  
52 natal if it occurred between 3-9 months before the recorded delivery date.  
53  
54 (ii) Read codes indicating any sign of pregnancy (antenatal): In this case an HIV test was considered  
55 antenatal if it occurred within 6 months from the day the Read code was recorded.  
56  
57 (iii) Read codes associated with the postpartum period: In this case the HIV test was considered  
58 antenatal if it occurred within 3-10 months before the corresponding record.  
59  
60

1  
2  
3 (iv) Read codes indicating any sign of miscarriage or abortion: An HIV test was recorded as ante-natal  
4 if it occurred between 3 months prior to 3 months after the corresponding record.  
5

6 The Read codes associated with pregnancy are listed in the supplementary material. The antenatal  
7 HIV tests were excluded from the numerator and the corresponding patients were removed from the  
8 denominator for the related period as well.  
9

10 We plotted the trends in HIV testing rates per 100,000 person years for 2000-2015 separately for men  
11 and women (including and excluding ante-natal HIV tests) for all adults and restricted to those aged  
12 16-44 years old. In addition, we calculated the annual proportion of HIV tests that were positive for  
13 each year to investigate whether testing improved in terms of targeting higher risk individuals during  
14 the later years.  
15

16 For the years 2005, 2010 and 2015, we estimated and tabulated HIV testing rates and incidence rate  
17 ratios (IRR) with 95% confidence intervals from Poisson models for males and females separately  
18 according to whether practice was in London or not, by age, ethnicity, IMD, and by type of location.  
19

20 To validate our estimates of HIV testing rates recorded in CPRD, we compared them with those from  
21 national surveillance data collected by PHE for 2015<sup>30</sup>. Finally, we estimated the prevalence of  
22 diagnosed HIV recorded in CPRD and compared this with estimated prevalence from national  
23 surveillance data collected by PHE using SOPHID and HARS to determine the proportion of all HIV  
24 diagnoses that were recorded in CPRD. Data analysis was performed using STATA version 14.  
25  
26  
27  
28  
29  
30  
31  
32  
33

## 34 35 **RESULTS**

36 Data were available on 5,979,598 distinct patients with 45,093,761 (males 22,155,768; females  
37 22,937,630) person years of observation. The demographic characteristics of included individuals are  
38 shown in Table 1. There were less males (48%) than females (52%). Practices (15%) and individuals  
39 (16%) in the most deprived quintile of IMD were under-represented in CPRD. The total number of  
40 HIV tests recorded in CPRD between 2000 and 2015 was 159,115 of which 357 (0.2%) were positive.  
41  
42  
43  
44  
45

### 46 47 *Trends in HIV testing rates 2000-2015 in Primary Care*

48 Figure 1 shows the trend in HIV testing rates per 100,000 person years for the period 2000-2015 by  
49 gender and age group, with and without inclusion of antenatal testing. The main reason for HIV testing  
50 among women of child-bearing age was antenatal screening: the testing rates (per 100,000 person-  
51 years) in all women aged 16-44 increased from 177 (95% CI 167-188) in 2000 to 1789 (1757-1821) in  
52 2010 and then decreased to 839 (817, 862) in 2015, with the corresponding figures being 23 (19-26),  
53 262 (250-275) and 190 (179-201) when antenatal testing was excluded. For males the corresponding  
54 rates were 26 (22-29), 196 (185-206) and 137 (127-146), which are lower than rates for females even  
55  
56  
57  
58  
59  
60

1  
2  
3 when antenatal tests are excluded. HIV testing rates in Primary Care peaked in females in 2010 (figure  
4 1) and have declined markedly since then. In men and women not tested ante-natally, HIV testing  
5 rates increased until 2012-2013, but have declined since. Similar patterns were seen when data were  
6 restricted to those aged 16-44 years only, except that rates were much higher in younger adults  
7 compared with those aged 45 years and over (supplementary table 1 all adults, supplementary table  
8 2 for those aged 16-44 years).  
9

#### 15 *Trends in positive HIV diagnosis in Primary Care*

16 Although the number of HIV tests was much higher in women, more men tested positive:  
17 196/20,328 (0.96%) men compared with 161/138,787 (0.12%) women. This was skewed by a very  
18 low rate of positive diagnoses in younger females who were screened ante-natally. The smoothed  
19 trend in the percentage of tests that were positive for men and women of different ages is shown in  
20 figure 2 (plot of raw data is shown in supplementary\_figure). Percentage positive (excluding ante-  
21 natal tests), was similar in men and women before 2005, but declined more sharply in women  
22 thereafter. The percentage of tests that were positive peaked around 2003 and have fallen sharply  
23 since 2010, indicating that there is no evidence of better targeting of testing to individuals in later  
24 years.  
25  
26  
27  
28  
29  
30  
31  
32

#### 33 *HIV testing rates in practices within and outside London, by age and deprivation index*

34 HIV testing rates were two-fold higher in London compared with outside London for both men and  
35 women in 2005 and this differential increased in 2010 and 2015. Table 2 and table 3 give the testing  
36 rates for years 2005, 2010 and 2015 for males and females (excluding antenatal tests), respectively,  
37 stratified by whether the practices were in London or outside London. Data for all years between 2000  
38 and 2015 are given for all adults (supplementary table 1) and for adults aged 16-44 years  
39 (supplementary table 2). In more recent years practices outside London but in conurbations had  
40 higher rates than those in cities or towns, which in turn had higher rates than rural practices. Although  
41 testing rates in men in London practices decreased between 2010 and 2015 overall from 273 (251-  
42 295) to 246 (225-266) per 100,000 person-years, there was evidence of a shift in targeting of testing  
43 since rates increased in older men from 151 (127-176) to 180 (154-206) per 100,000 person-years and  
44 in the most deprived quintile from 415 (351-480) to 565 (487-643) per 100,000 person-years. This  
45 targeting effect was also seen among women in London practices, but not in practices outside London.  
46 However, in 2015 in London it remained the case that older people were less likely to be tested:  
47 incidence rate ratio (IRR) for age  $\geq 45$  compared with 16-44 years was 0.59 (0.50-0.71) for men and  
48 0.46 (0.38-0.55) in women. The corresponding IRR for outside London were much lower: IRR for age  $\geq$   
49  
50  
51  
52  
53  
54  
55  
56  
57  
58  
59  
60

1  
2  
3 45 compared with 16-44 years was 0.37 (0.32-0.43) in men and 0.18 (0.16-0.21) in women. In contrast,  
4 by 2015 the most deprived group were 2- or 3-fold more likely to be tested than the least deprived,  
5 depending on gender and locality, with IRR for IMD quintile 5 versus 1 increasing markedly from 2005  
6 through to 2015 (table 2 (males) and table 3 (females)).  
7  
8  
9

#### 10 11 *HIV testing rates and positivity according to national surveillance data*

12 For comparison, national surveillance data for 2015 estimated that General Practices in extremely  
13 high prevalence areas defined as greater than 5/1000 population (comparable with "London" in our  
14 CPRD study) carried out the highest number of tests per practice population, 860 per 100 000 person  
15 years. This was nearly double the coverage rate of General Practices in high diagnosed prevalence  
16 areas defined as greater than 2/1000 population (440/100 000), and ten times the coverage rate  
17 among General Practices in low diagnosed prevalence areas (90/100 000). The estimates from  
18 surveillance were higher than our estimates from CPRD (table 2 and table 3). The proportion of  
19 positive tests among those tested in Primary Care estimated from SSBBV surveillance data was 0.4%  
20 in 2015<sup>30</sup>. This varied from 0.5% in very high prevalence areas to 0.2% in low prevalence areas and  
21 was consistent with our estimated positivity (figure 2).  
22  
23  
24  
25  
26  
27  
28  
29

#### 30 31 *Prevalence of recorded HIV in CPRD and comparison with national surveillance estimates*

32 In 2015 the prevalence of diagnosed HIV recorded in CPRD was 2.8 per 1000 adult patients in  
33 London practices and 0.8 per 1000 in the rest of the UK (table 4). According to PHE surveillance, in  
34 2015 HIV prevalence in UK was estimated to be 1.6 per 1000, and excluding undiagnosed HIV was  
35 1.3 per 1000 population.<sup>2</sup> The HIV prevalence in London was estimated to be 4.7 per 1000,  
36 substantially higher than the rest of the UK at 1.1 per 1000. The corresponding observed prevalence,  
37 that is, excluding undiagnosed cases of HIV, was 4.2 and 0.9 per 1000 population in London and the  
38 rest of the UK, respectively.<sup>2</sup> Therefore, only two-thirds of PLWHIV in London were likely known to  
39 General Practice whereas in the rest of the UK this increased to nearly 90%. However, these  
40 percentages are likely to be over-estimated as children aged <16 years were not included in the  
41 CPRD calculations of prevalence but were included in PHE data. If we assume that 20% of the UK  
42 population are aged <16 years old and that only 1000 children are living with HIV, then the  
43 prevalence of diagnosed HIV among adults could be as high as 5.1 and 1.2 per 1000 in London and  
44 outside London, respectively. The estimated percentage of HIV diagnoses among adults recorded in  
45 CPRD may be as low as 55% and 67% in London and the rest of the UK, respectively. In General  
46 Practices in London, prevalence of HIV recorded in CPRD was higher for males, older individuals,  
47  
48  
49  
50  
51  
52  
53  
54  
55  
56  
57  
58  
59  
60

1  
2  
3 Black African ethnicity and most deprived quintile (table 4) with a similar pattern in practices outside  
4 London except that prevalence did not vary by age.  
5  
6  
7

## 8 **Discussion**

### 9 *Statement of principal findings*

10  
11  
12  
13  
14 Our analysis of CPRD data on GP consultations recorded on approximately 6 million people living in  
15 the UK over a 15-year period, shows that the initial rise in HIV testing seen in Primary Care between  
16 2000 and 2010 reversed with a significant drop in the testing rates for HIV in primary care from  
17 2010. This is an unexpected finding as throughout this period prevalence of HIV has been increasing  
18 which should have engendered higher rates of testing in Primary Care, given the NICE  
19 recommendations on testing, which would increase with increased prevalence<sup>31,32</sup>. HIV testing rates  
20 in Primary Care were higher in women than men throughout the study period, even when tests for  
21 antenatal screening were excluded, despite HIV prevalence being higher in men. This resulted in  
22 men being eight-fold more likely to test positive than women in this setting. Over the 15-year period  
23 of the study, there were approximately 2 positive results per 1000 HIV tests. We did not find  
24 evidence of better targeting of HIV testing to individuals in more recent years as the percentage of  
25 tests that were positive peaked around 2003. Many individuals at high risk of HIV infection may  
26 choose to test in settings other than General Practice, such as sexual health clinics, which might  
27 make it harder to target HIV testing among the population attending Primary Care.  
28  
29

30  
31  
32  
33  
34  
35  
36  
37  
38 The pattern of HIV testing has also changed over time. Testing was two-fold higher in London than  
39 elsewhere and has increased in the groups and areas of high deprivation within London. This is  
40 reassuring as it also reflects the higher prevalence of HIV in these areas and indicates that HIV  
41 testing has become more geographically targeted. Overall, testing rates were higher in urban  
42 conurbations and cities than in rural areas reflecting the national prevalence figures<sup>2</sup>. Younger  
43 people were more likely to be tested than those aged 45 years and over, which reflects the incidence  
44 pattern for HIV. However, our data shows an increasing trend in the rate of testing among the older  
45 age group in London, but not elsewhere, which may have been driven by the recognition that among  
46 those with HIV infection the proportion diagnosed late is higher in older age groups<sup>33</sup>.  
47  
48  
49  
50  
51  
52

53  
54 In 2015, the prevalence of HIV recorded in CPRD was over three-fold higher in London than  
55 elsewhere, but overall was substantially lower than the prevalence of diagnosed HIV estimated from  
56 PHE surveillance<sup>2</sup>. This may be due to HIV-positive individuals not using primary care or to non-  
57 disclosure of their HIV status to their GP, not recording of the diagnosis on GP systems, or to CPRD  
58  
59  
60



1  
2  
3 not including sufficient practices with high HIV prevalence. CPRD is broadly representative of  
4 Primary Care in the UK, but the UK HIV epidemic is concentrated in cities with approximately half of  
5 HIV-positive individuals living in London<sup>2</sup>. The estimated percentage of HIV diagnoses among adults  
6 that were recorded in CPRD increased between 2005 and 2015 but was still substantially lower in  
7 London than elsewhere. This trend may reflect the ageing HIV population's greater requirement of  
8 primary care services, decrease in stigma of disclosure, or better transfer and recording in Primary  
9 Care of positive results of HIV tests carried out in other settings in later years.

#### 15 *Strengths and weaknesses of the study*

17 This study is very large with data from nearly six million patients followed over fifteen years with  
18 detailed primary care records. This detailed coverage enabled us to accurately measure HIV testing  
19 rates according to the important factors of deprivation, urbanisation, gender, ethnicity and age.  
20 Records were collected prospectively and electronically over a significant time period; therefore, we  
21 were able to show clearly the trends that have occurred. Our analysis and the data collection may be  
22 biased by several factors. The CPRD only includes a sample of general practices, but this is broadly  
23 representative of Primary Care in the UK, and, given the large numbers, this is a sufficient sample  
24 size for estimates of testing rates to be accurate. We have shown the CPRD slightly under  
25 represents deprivation, in both individuals and GP practices. Whilst this may be the case, given the  
26 very large sample size, we think that we can still draw valuable conclusions from this data. This  
27 study can only show the rates of testing in Primary Care. What is clear, given the number of HIV  
28 positive patients, is that many patients will have been diagnosed in other healthcare settings, for  
29 example, PHE estimated that in England during 2016 5.9% and 7.3% of new diagnoses in men and  
30 women, respectively, were made in Primary Care<sup>34</sup>. This implies that estimates of the prevalence of  
31 diagnosed HIV based on diagnoses recorded in CPRD will be under-estimates for the UK which we  
32 have shown by comparing with surveillance data from PHE.

#### 45 *Strengths and weaknesses in relation to other studies, discussing important differences in results*

47 HIV testing in Primary Care in the Netherlands also decreased between 2010-2015 despite similar  
48 guidelines encouraging more pro-active screening for HIV<sup>35</sup>. Although HIV testing in Primary Care has  
49 declined, the rates of late diagnosis (CD4 count less than 350 cells/mL) have also declined from 50%  
50 in 2010 to 39% in 2015<sup>36</sup>, indicating a discordancy between the testing in Primary Care and  
51 diagnosis. This indicates that increased testing has likely occurred in other settings. Earlier diagnosis  
52 may be due to better detection in secondary care, either from screening or testing those with  
53 indicator conditions, or through other routes such as sexual health clinics, insurance requests or  
54 specialist testing services. Moreover, if testing has become better targeted in Primary Care and  
55  
56  
57  
58  
59  
60

1  
2  
3 incidence in the consulting population is decreasing then even without an increase in testing, those  
4 who get tested may be tested earlier in the course of HIV infection leading to reduced rates of late  
5 diagnoses. However, we have shown a significant decline in HIV testing in Primary Care since the  
6 previous analysis by Evans *et al*<sup>25</sup> on testing up to 2005, and therefore we can look at increased  
7 testing in primary care as an option to improve early HIV detection rates.  
8  
9

#### 10 11 12 *Meaning of the study: possible explanations and implications for clinicians and policymakers*

13  
14 Since 2015, UK and international treatment guidelines<sup>37</sup> for those diagnosed with HIV recommend  
15 immediate treatment with antiretroviral therapy (ART) due to findings from the START trial<sup>38</sup>. This  
16 change, together with pre-exposure prophylaxis (PrEP), has resulted in a decline in HIV infection  
17 rates for the last 2 years<sup>34</sup>. Nevertheless, there are still opportunities for diagnosing HIV earlier in  
18 Primary Care whilst testing rates remain very low. Current UK testing guidelines<sup>34</sup> recommend  
19 people attending General Practices in areas of high HIV prevalence should be offered an HIV test at  
20 registration or when having a blood test if they have not had an HIV test in the past 12 months.  
21 People newly diagnosed with an HIV indicator condition should also be offered an HIV test. The aim  
22 is to diagnose HIV earlier as late diagnosis of HIV is associated with increased morbidity and  
23 mortality.<sup>7,39,40</sup> There are benefits for diagnosing HIV earlier both for the individual in terms of  
24 quality of life and life expectancy<sup>6</sup> and a wider societal benefit of reduced transmission and lower  
25 NHS treatment costs.  
26  
27  
28  
29  
30  
31  
32  
33  
34  
35  
36  
37

#### 38 *Unanswered questions and future research*

39  
40 Although it is a public health imperative, and target, to increase HIV testing and diagnosis, it is  
41 unclear how this could be implemented in Primary Care. A literature review undertaken of public  
42 and Health Care Professional (HCP) attitudes towards HIV testing in the UK showed that a proactive  
43 offer of an HIV test by the HCP was an important factor which could help increase testing rates.<sup>20</sup>  
44 Reasons for low levels of HIV testing by the HCP include fear/concern of offending patients,  
45 inadequate knowledge/training on HIV, low awareness of current testing guidelines,  
46 underestimation of patient risk, insufficient time, competing priorities, perceived burdensome  
47 consent process and pre-test discussion.<sup>18-20,41</sup> Studies indicate a need for education and training on  
48 HIV testing for HCP in Primary Care to overcome these barriers to testing.<sup>16,42</sup> Adequate  
49 interventions are needed to address these barriers so individuals can receive a timely HIV test and  
50 with it the important treatment benefits and care if found to be HIV positive. Another literature  
51 review has provided evidence that HIV indicator conditions have the potential to be used more  
52  
53  
54  
55  
56  
57  
58  
59  
60

effectively as triggers for earlier HIV testing<sup>43</sup>. Opt-out testing can facilitate increased HIV testing as has been evident from a trial in emergency care setting<sup>44</sup>. When blood tests are carried out for any reason in primary care, there could also be an opt-out HIV test. Computer prompts based on risk algorithms are another strategy to support HIV testing<sup>45-49</sup> which could be based on electronic health records such as those in CPRD.

Although the results shown here are for a UK based population the methodology may be applicable to other healthcare systems. They provide accurate testing rates and detection rates in Primary Care which are measures of HIV testing that can be used for international comparisons. A key element for preventing transmission and late diagnosis of HIV is testing in Primary Care, based on a screening strategy or indicator conditions<sup>50</sup>. These data inform us of the current situation on testing and will be useful in planning and evaluating interventions to improve this.

The data on the discrepancy between PHE and CPRD prevalence of HIV positive status being recorded is another finding of importance for planning. New testing strategies such as home test and rapid testing outside of standard health care settings may contribute to the decrease in testing in Primary Care. These need to have a strategy in their delivery to feed back to Primary Care to maximise the benefits to patients and their health networks.

### *Conclusions*

HIV testing rates have declined in Primary Care in all age groups, although there has been a fall in late presentation. HIV testing rates are highest in London, and higher in urban areas than rural areas. Increased testing would likely increase the number of positive tests and help prevent late diagnosis. Further interventions to increase selectivity of testing (positive cases per test) may be required, either at the individual level using risk factors and HIV indicator conditions or at the practice level using knowledge of local HIV prevalence.

### **Contributor and guarantor information**

MG and MM planned the research study and were responsible for study design. JM and TJ advised on study design. CD applied for ethics approval and did the literature search. TJ and CD obtained data from CPRD and helped with coding and extracting data. SM was responsible for statistical analyses, tables and graphs. MM, SM and MG wrote the first draft of the paper. All authors contributed to writing and revising the paper and agreed to submission. MM acts as guarantor for the conduct of the study, had full access to the data and made decision to publish.

### **Ethics approval**

1  
2  
3 The protocol was submitted to and approved by the independent scientific advisory committee for  
4 the CPRD (protocol ISAC number 16\_172A). The study was approved by the South West, Frenchay,  
5 Research Ethics Committee on the 19/09/2016 (REC reference 16/SW/0286).  
6

### 7 **Transparency statement**

8  
9 Margaret May affirms that the manuscript is an honest, accurate and transparent account of the  
10 study, and that no important aspects of the study have been omitted. The sponsor had no role in  
11 research or decision to publish.  
12

### 13 **Competing Interests statement**

14  
15 No authors have any competing interests.  
16

### 17 **Role of the funding source:**

18  
19 The study was supported by Research Capability Funding from North Bristol NHS Trust. This study is  
20 based in part on data from the Clinical Practice Research Datalink (CPRD) obtained under licence  
21 from the UK Medicines and Healthcare products Regulatory Agency. This report is independent  
22 research supported by the National Institute for Health Research (NIHR) Health Protection Research  
23 Unit (HPRU) in Evaluation of Interventions at University of Bristol in partnership with Public Health  
24 England. TJ's time is supported by the NIHR Collaboration for Leadership in Applied Health Research  
25 and Care West (CLAHRC West) at University Hospitals Bristol NHS Foundation Trust. MM is also  
26 supported by the NIHR Biomedical Research Centre at University Hospitals Bristol NHS Foundation  
27 Trust and the University of Bristol. However, the interpretation and conclusions contained in this  
28 report are those of the authors and not necessarily those of the NHS, the NIHR, CPRD or the  
29 Department of Health.  
30  
31  
32

### 33 **Acknowledgements**

34  
35 We would like to thank the following authors; Joni Jackson, Natalia V. Lewis, Gene S Feder, Penny  
36 Whiting, Timothy Jones, John Macleod and Maria Theresa Redaniel for sharing their medical  
37 codes to identify pregnancy, delivery and abortion used in our data analysis.  
38  
39

### 40 **Data sharing**

41  
42 No additional data is available as use of the data was licensed by CPRD and therefore cannot be  
43 shared further.  
44

## 45 **References**

- 46  
47 1. Brown AE, Kirwan PD, Chau C, Khawam J, Gill ON, VC. D. Public Health England, London.  
48 Towards elimination of HIV transmission, AIDS and HIV-related deaths in the UK – 2017  
49 report. 2017.
- 50  
51 2. Kirwan PC, C; Brown, AE; Delpech, VC; and contributors;. *HIV in the UK - 2016 report*.  
52 London: Public Health England;2016.
- 53  
54 3. Ellis S, Curtis H, Ong ELC, British HIVAB, Stand BCA. HIV diagnoses and missed opportunities.  
55 Results of the British HIV Association (BHIVA) National Audit 2010. *Clinical Medicine*.  
56 2012;12(5):430-434.
- 57  
58 4. Chadborn TR, Delpech VC, Sabin CA, Sinka K, Evans BG. The late diagnosis and consequent  
59 short-term mortality of HIV-infected heterosexuals (England and Wales, 2000-2004). *Aids*.  
60 2006;20(18):2371-2379.

5. Girardi E, Sabin CA, Monforte AdA. Late diagnosis of HIV infection: Epidemiological features, consequences and strategies to encourage earlier testing. *Aids-Journal of Acquired Immune Deficiency Syndromes*. 2007;46:S3-S8.
6. May M, Gompels M, Delpech V, et al. Impact of late diagnosis and treatment on life expectancy in people with HIV-1: UK Collaborative HIV Cohort (UK CHIC) Study. *British Medical Journal*. 2011;343(d6016).
7. Croxford S, Kitching A, Desai S, et al. Mortality and causes of death in people diagnosed with HIV in the era of highly active antiretroviral therapy compared with the general population: an analysis of a national observational cohort. *The Lancet Public Health*. 2017;2(1):e35-e46.
8. Beck EJ, Mandalia S, Sangha R, et al. The Cost-Effectiveness of Early Access to HIV Services and Starting cART in the UK 1996-2008. *PloS one*. 2011;6(12).
9. Rodger AJ, Cambiano V, Bruun T, et al. Sexual Activity Without Condoms and Risk of HIV Transmission in Serodifferent Couples When the HIV-Positive Partner Is Using Suppressive Antiretroviral Therapy. *Jama-J Am Med Assoc*. 2016;316(2):171-181.
10. NICE. National Institute of Health and Care Excellence (NICE). HIV testing: increasing uptake among people who may have undiagnosed HIV. Economic assessment: resource impact of recommendations. March 2016 (accessed 07/2016) <https://www.nice.org.uk/guidance/GID-PHG91/documents/economic-report>. 2016.
11. NICE. National Institute of Health and Care Excellence (NICE). HIV testing: increasing uptake among people who may have undiagnosed HIV. (accessed 09/2017) [niceorguk/guidance/ng60](https://www.nice.org.uk/guidance/ng60). 2016.
12. Read P, Armstrong-James D, Tong CYW, Fox J. Missed opportunities for HIV testing-a costly oversight. *Qjm-an International Journal of Medicine*. 2011;104(5):421-424.
13. Joore IK, Arts DL, Kruijer MJ, et al. HIV indicator condition-guided testing to reduce the number of undiagnosed patients and prevent late presentation in a high-prevalence area: a case-control study in primary care. *Sex Transm Infect*. 2015;91(7):467-472.
14. Burns FM, Johnson AM, Nazroo J, et al. Missed opportunities for earlier HIV diagnosis within primary and secondary healthcare settings in the UK. *Aids*. 2008;22(1):115-122.
15. BHIVA. British HIV Association. UK National Guidelines for HIV testing 2008; (accessed 04/2016) <http://www.bhiva.org/HIVtesting2008.aspx>. 2008.
16. Elmahdi R, Gerver SM, Guillen GG, Fidler S, Cooke G, Ward H. Low levels of HIV test coverage in clinical settings in the UK: a systematic review of adherence to 2008 guidelines. *Sexually transmitted infections*. 2014;90(2):119-124.
17. Hartney T, Kennedy I, Crook P, Nardone A. Expanded HIV testing in high-prevalence areas in England: results of a 2012 audit of sexual health commissioners. *HIV medicine*. 2014;15(4):251-254.
18. Deblonde J, De Koker P, Hamers FF, Fontaine J, Luchters S, Temmerman M. Barriers to HIV testing in Europe: a systematic review. *European Journal of Public Health*. 2010;20(4):422-432.
19. Bolsewicz K, Vallely A, Debattista J, Whittaker A, Fitzgerald L. Factors impacting HIV testing: a review - perspectives from Australia, Canada, and the UK. *Aids Care-Psychological and Socio-Medical Aspects of Aids/Hiv*. 2015;27(5):570-580.
20. Davies C, Gompels M, May M. Public and Healthcare Practitioner attitudes towards HIV testing: Review of the evidence in the UK. *International STD Research and Reviews*. 2015;3(3):991-1022.
21. Scognamiglio P, Chiaradia G, De Carli G, et al. The potential impact of routine testing of individuals with HIV indicator diseases in order to prevent late HIV diagnosis. *Bmc Infect Dis*. 2013;13.
22. Goodall L, Leen C. Late diagnosis of HIV: could this be avoided? *Scott Med J*. 2011;56(2):84-86.

- 1  
2  
3  
4  
5  
6  
7  
8  
9  
10  
11  
12  
13  
14  
15  
16  
17  
18  
19  
20  
21  
22  
23  
24  
25  
26  
27  
28  
29  
30  
31  
32  
33  
34  
35  
36  
37  
38  
39  
40  
41  
42  
43  
44  
45  
46  
47  
48  
49  
50  
51  
52  
53  
54  
55  
56  
57  
58  
59  
60
23. Joore IK, Reukers DF, Donker GA, et al. Missed opportunities to offer HIV tests to high-risk groups during general practitioners' STI-related consultations: an observational study. *BMJ Open*. 2016;6(1):e009194.
  24. Health Protection Agency (HPA). Time to test for HIV: expanding HIV testing in healthcare and community services in England (accessed 09/2017) [http://www.bhiva.org/documents/Publications/Time to test final report Sept 2011.pdf](http://www.bhiva.org/documents/Publications/Time_to_test_final_report_Sept_2011.pdf). 2011.
  25. Evans HER, Mercer CH, Rait G, et al. Trends in HIV testing and recording of HIV status in the UK primary care setting: a retrospective cohort study 1995-2005. *Sexually transmitted infections*. 2009;85(7):520-526.
  26. Herrett E, Gallagher AM, Bhaskaran K, et al. Data Resource Profile: Clinical Practice Research Datalink (CPRD). *Int J Epidemiol*. 2015;44(3):827-836.
  27. Jackson J, Lewis NV, Feder GS, et al. Exposure to domestic violence and abuse and consultations for emergency contraception: nested case-control study in a UK primary care dataset. *Br J Gen Pract* DOI: <https://doi.org/10.3399/bjgp18X700277>. 2018.
  28. National Statistics. English Indices of Deprivation 2015. Statistics on relative deprivation in small areas in England. <https://www.gov.uk/government/statistics/english-indices-of-deprivation-2015> (accessed 04/2016). 2015.
  29. Rhodes SD, Vissman AT, Stowers J, et al. A CBPR Partnership Increases HIV Testing Among Men Who Have Sex With Men (MSM): Outcome Findings From a Pilot Test of the CyBER/testing Internet Intervention. *Health Education & Behavior*. 2011;38(3):311-320.
  30. Public Health England (PHE). Health Protection Report. Annual report from the sentinel surveillance study of blood borne virus testing in England: data for January to December 2015  
(Accessed July 2016) [https://assets.publishing.service.gov.uk/government/uploads/system/uploads/attachment\\_data/file/540332/hpr2416\\_bbvs.pdf](https://assets.publishing.service.gov.uk/government/uploads/system/uploads/attachment_data/file/540332/hpr2416_bbvs.pdf). 2016.
  31. NICE. National Institute for Health and Care Excellence (NICE). Increasing the uptake of HIV testing to reduce undiagnosed infection and prevent transmission among black African communities living in England. *NICE Public Health Guidance 33* (accessed 10/2014) <http://nice.org.uk>. 2011.
  32. NICE. National Institute for Health and Care Excellence (NICE). Increasing the uptake of HIV testing among men who have sex with men. *NICE Public Health Guidance 34* (accessed 09/2014) <http://nice.org.uk>. 2011.
  33. Tavošchi L, Gomes Dias J, Pharris A. New HIV diagnoses among adults aged 50 years or older in 31 European countries, 2004-15: an analysis of surveillance data. *Lancet HIV*. 2017;4(11):e514-e521.
  34. Nash SGF, M; Gill, O.N.; Connor, N.; and contributors;. *HIV testing in England: 2017 report*. . London: Public Health England; 1/11/2017 2017.
  35. Joore IK, van Bergen J, Ter Riet G, van der Maat A, van Dijk N. Development and evaluation of a blended educational programme for general practitioners' trainers to stimulate proactive HIV testing. *BMC family practice*. 2018;19(1):36.
  36. Public Health England (PHE). HIV: annual data tables. HIV surveillance data in the UK by demographic characteristics and geographical region. (Accessed 7/2016) <https://www.gov.uk/government/statistics/hiv-annual-data-tables>. 2015 (updated 2017).
  37. World Health Organisation (WHO). Guideline on when to start antiretroviral therapy and on pre-exposure prophylaxis for HIV. Geneva: World Health Organization, 2015 (<http://www.who.int/hiv/pub/guidelines/earlyrelease-arv/en> (accessed 07/17). Sept 2015.
  38. Lundgren JD, Babiker AG, Gordin F, et al. Initiation of Antiretroviral Therapy in Early Asymptomatic HIV Infection. *The New England journal of medicine*. 2015;373(9):795-807.

- 1  
2  
3  
4  
5  
6  
7  
8  
9  
10  
11  
12  
13  
14  
15  
16  
17  
18  
19  
20  
21  
22  
23  
24  
25  
26  
27  
28  
29  
30  
31  
32  
33  
34  
35  
36  
37  
38  
39  
40  
41  
42  
43  
44  
45  
46  
47  
48  
49  
50  
51  
52  
53  
54  
55  
56  
57  
58  
59  
60
39. Sabin C. Review of life expectancy in people with HIV in settings with optimal ART access: what we know and what we don't. *Journal of the International AIDS Society*. 2012;15:4.
40. Nakagawa F, Lodwick RK, Smith CJ, et al. Projected life expectancy of people with HIV according to timing of diagnosis. *Aids*. 2012;26(3):335-343.
41. Hunter E, Perry M, Leen C, Premchand N. HIV testing: getting the message across—a survey of knowledge, attitudes and practice among non-HIV specialist physicians. *Postgraduate Medical Journal*. 2012;88(1036):59-65.
42. Pillay TD, Mullineux J, Smith CJ, Matthews P. Unlocking the potential: longitudinal audit finds multifaceted education for general practice increases HIV testing and diagnosis. *Sexually transmitted infections*. 2013;89(3):191-U125.
43. Davies C, Gompels M, May M. Use and Effectiveness of HIV Indicator Conditions in Guiding HIV Testing: A Review of the Evidence  
*International STD Research & Reviews*. 2017;6(2):1-27.
44. Montoy JC, Dow WH, Kaplan BC. Patient choice in opt-in, active choice, and opt-out HIV screening: randomized clinical trial. *BMJ (Clinical research ed)*. 2016;532:h6895.
45. Federman D, Kravetz J, Vasquez L, , Campbell S. Improving human immunodeficiency virus testing rates with an electronic clinical reminder. *The American Journal of Medicine*. 2012;125(3):240-242.
46. Schrantz SJ, Babcock CA, Theodosis C, Brown S, Mercer S, Pillow MT ea. A targeted, conventional assay, emergency department HIV testing program integrated with existing clinical procedures. . *Ann Emerg Med*. 2011;58((1 Suppl 1)::S85-88.e81.
47. Goetz MB, Hoang T, Bowman C, Knapp H, Rossman B, Smith R. A system-wide intervention to improve HIV testing in the Veterans Health Administration. . *J Gen Intern Med*. 2008;23(8):1200-1207.
48. Menza TW HJ, Celum CL, Golden, MR. Prediction of HIV acquisition among men who have sex with men. . *Sex Transm Dis*. 2009;36(9):547-555.
49. Sharghi N, Bosch RJ, Mayer K, Essex M, Seage GR. The development and utility of a clinical algorithm to predict early HIV-1 infection. . *J Acquir Immune Defic Syndr*. 2005;40(4):472-478.
50. Joore IK, Twisk DE, Vanrolleghem AM, et al. The need to scale up HIV indicator condition-guided testing for early case-finding: a case-control study in primary care. *BMC family practice*. 2016;17(1):161.

Table 1: Patient and practice demographics

| Demographic Variable | Group           | Frequency | Percentage (%) |
|----------------------|-----------------|-----------|----------------|
| Gender               | Males           | 2,871,884 | 48.03          |
|                      | Females         | 3,107,562 | 51.97          |
|                      | Other/Unknown   | 152       | 0.00           |
| Age (in 2015)        | 16-44           | 2,684,443 | 44.89          |
|                      | >44             | 3,295,155 | 55.11          |
| Ethnicity            | Asian           | 147,295   | 2.46           |
|                      | Black African   | 45,632    | 0.76           |
|                      | Black Caribbean | 28,558    | 0.48           |
|                      | Other           | 118,934   | 1.99           |
|                      | White           | 3,328,189 | 55.66          |
|                      | Unknown         | 2,310,990 | 38.65          |

|                                                                         |                    |           |       |
|-------------------------------------------------------------------------|--------------------|-----------|-------|
| <b>Region</b>                                                           | Outside London     | 4,693,116 | 78.49 |
|                                                                         | London             | 1,129,924 | 18.90 |
|                                                                         | Unknown            | 156,558   | 2.62  |
| <b>Urban/Rural</b>                                                      | Urban(Conurbation) | 2,134,497 | 35.70 |
|                                                                         | Urban(City/Town)   | 2,991,079 | 50.02 |
|                                                                         | Rural              | 697,452   | 11.66 |
|                                                                         | Unknown            | 156,558   | 2.62  |
| <b>Patient IMD (2015)</b><br>1=least deprived, ...,<br>5=most deprived  | Quintile 1         | 1,285,213 | 21.49 |
|                                                                         | Quintiles 2,3,4    | 3,564,936 | 59.62 |
|                                                                         | Quintile 5         | 964,853   | 16.14 |
|                                                                         | Unknown            | 164,596   | 2.75  |
| <b>Practice IMD (2015)</b><br>1=least deprived, ...,<br>5=most deprived | Quintile 1         | 1,249,293 | 20.89 |
|                                                                         | Quintiles 2,3,4    | 3,702,313 | 61.92 |
|                                                                         | Quintile 5         | 871,434   | 14.57 |
|                                                                         | Unknown            | 156,558   | 2.62  |



Table 2: Testing rates (per 100,000 person years) for **males** and incidence rate ratios (IRR) with 95% CI for years 2005, 2010, 2015.

| London                     |                |                    |         |                  |                     |         |                 |                    |         |
|----------------------------|----------------|--------------------|---------|------------------|---------------------|---------|-----------------|--------------------|---------|
|                            | 2005           |                    |         | 2010             |                     |         | 2015            |                    |         |
|                            | Rate (95% CI)  | IRR (95% CI)       | p-value | Rate (95% CI)    | IRR (95% CI)        | p-value | Rate (95% CI)   | IRR (95% CI)       | p-value |
| <b>Overall</b>             | 133 (117, 148) | -                  | -       | 273 (251, 295)   | -                   | -       | 246 (225, 266)  | -                  | -       |
| <b>Age</b>                 |                |                    |         |                  |                     |         |                 |                    |         |
| 16-44                      | 175 (151, 198) | 1                  | <0.0001 | 366 (333, 400)   | 1                   | <0.0001 | 304 (272, 336)  | 1                  | <0.0001 |
| >=45                       | 75 (56, 93)    | 0.43 (0.33, 0.56)  |         | 151 (127, 176)   | 0.41 (0.34, 0.50)   |         | 180 (154, 206)  | 0.59 (0.50, 0.71)  |         |
| <b>Ethnicity</b>           |                |                    |         |                  |                     |         |                 |                    |         |
| White                      | 102 (80, 125)  | 1                  |         | 240 (206, 275)   | 1                   |         | 222 (187, 256)  | 1                  |         |
| Asian                      | 152 (73, 232)  | 1.49 (0.85, 2.62)  | <0.0001 | 329 (220, 438)   | 1.37 (0.95, 1.96)   | <0.0001 | 167 (88, 247)   | 0.76 (0.47, 1.22)  | <0.0001 |
| Black African              | 669 (361, 977) | 6.53 (3.93, 10.85) |         | 1227 (849, 1605) | 5.10 (3.63, 7.18)   |         | 919 (602, 1236) | 4.15 (2.84, 6.06)  |         |
| Black Caribbean            | 216 (432, 389) | 2.11 (0.92, 4.82)  |         | 361 (148, 574)   | 1.50 (0.82, 2.76)   |         | 523 (267, 779)  | 2.36 (1.42, 3.95)  |         |
| <b>Patient IMD (2015)*</b> |                |                    |         |                  |                     |         |                 |                    |         |
| Quintile 1                 | 160 (119, 202) | 1                  |         | 207 (159, 254)   | 1                   |         | 200 (153, 248)  | 1                  |         |
| Quintiles 2,3,4            | 120 (102, 139) | 0.75 (0.56, 1.01)  | 0.0912  | 252 (226, 279)   | 1.22 (0.95, 1.57)   | <0.0001 | 177 (155, 198)  | 0.88 (0.68, 1.14)  | <0.0001 |
| Quintile 5                 | 155 (114, 195) | 0.96 (0.67, 1.40)  |         | 415 (351, 480)   | 2.01 (1.53, 2.65)   |         | 565 (487, 643)  | 2.82 (2.16, 3.68)  |         |
| Outside London             |                |                    |         |                  |                     |         |                 |                    |         |
|                            | 2005           |                    |         | 2010             |                     |         | 2015            |                    |         |
|                            | Rate (95% CI)  | IRR (95% C.I.)     | p-value | Rate (95% CI)    | IRR (95% C.I.)      | p-value | Rate (95% CI)   | IRR (95% C.I.)     | p-value |
| <b>Overall</b>             | 65 (60, 70)    | -                  | -       | 106 (100, 112)   | -                   | -       | 65 (60, 69)     | -                  | -       |
| <b>Age</b>                 |                |                    |         |                  |                     |         |                 |                    |         |
| 16-44                      | 95 (87, 103)   | 1                  | <0.0001 | 161 (150, 172)   | 1                   | <0.0001 | 100 (91, 109)   | 1                  | <0.0001 |
| >=45                       | 34 (29, 39)    | 0.36 (0.30, 0.42)  |         | 54 (48, 60)      | 0.34 (0.30, 0.38)   |         | 37 (32, 42)     | 0.37 (0.32, 0.43)  |         |
| <b>Ethnicity</b>           |                |                    |         |                  |                     |         |                 |                    |         |
| White                      | 63 (57, 69)    | 1                  |         | 100 (92, 108)    | 1                   |         | 63 (57, 70)     | 1                  |         |
| Asian                      | 159 (89, 229)  | 2.52 (1.61, 3.94)  | <0.0001 | 336 (245, 427)   | 3.36 (2.55, 4.44)   |         | 200 (135, 266)  | 3.16 (2.25, 4.45)  |         |
| Black African              | 579 (221, 937) | 9.17 (4.90, 17.16) |         | 1321 (859, 1783) | 13.24 (9.23, 18.97) |         | 584 (289, 878)  | 9.22 (5.51, 15.44) |         |
| Black Caribbean            | 185 (37, 366)  | 2.93 (1.09, 7.83)  |         | 506 (156, 856)   | 5.06 (2.86, 8.96)   |         | 202 (25, 379)   | 3.19 (1.32, 7.70)  |         |
| <b>Patient IMD (2015)*</b> |                |                    |         |                  |                     |         |                 |                    |         |
| Quintile 1                 | 60 (51, 69)    | 1                  |         | 98 (87, 110)     | 1                   |         | 61 (52, 70)     | 1                  |         |
| Quintiles 2,3,4            | 60 (54, 66)    | 1.0 (0.84, 1.20)   | 0.0002  | 94 (87, 101)     | 0.96 (0.83, 1.10)   | <0.0001 | 53 (48, 59)     | 0.87 (0.73, 1.04)  | <0.0001 |
| Quintile 5                 | 89 (75, 104)   | 1.49 (1.20, 1.86)  |         | 163 (145, 182)   | 1.66 (1.41, 1.96)   |         | 115 (99, 131)   | 1.89 (1.55, 2.31)  |         |
| <b>Urban/Rural class</b>   |                |                    |         |                  |                     |         |                 |                    |         |
| Conurbation                | 65 (55, 76)    | 1                  |         | 144 (129, 159)   | 1                   |         | 91 (79, 102)    | 1                  |         |
| City/Town                  | 69 (63, 75)    | 1.05 (0.88, 1.26)  | 0.0045  | 100 (93, 107)    | 0.70 (0.61, 0.79)   | <0.0001 | 60 (54, 65)     | 0.66 (0.56, 0.77)  | <0.0001 |
| Rural                      | 47 (37, 58)    | 0.72 (0.55, 0.95)  |         | 75 (62, 88)      | 0.52 (0.43, 0.64)   |         | 49 (39, 60)     | 0.55 (0.43, 0.70)  |         |

\*1=least deprived - 5=most deprived

Table 3: Testing rates (per 100000 person years) for **females** and incidence rate ratios (IRR) with 95% CI for years 2005, 2010, 2015 (antenatal testing excluded)

| London                     |                |                    |         |                 |                   |         |                |                    |         |
|----------------------------|----------------|--------------------|---------|-----------------|-------------------|---------|----------------|--------------------|---------|
|                            | 2005           | 2005               |         | 2010            | 2010              |         | 2015           | 2015               |         |
|                            | Rate (95% CI)  | IRR (95% CI)       | p-value | Rate (95% CI)   | IRR (95% CI)      | p-value | Rate (95% CI)  | IRR (95% CI)       | p-value |
| <b>Overall</b>             | 139 (123, 155) | -                  | -       | 309 (285, 332)  | -                 | -       | 243 (223, 264) | -                  | -       |
| <b>Age</b>                 |                |                    |         |                 |                   |         |                |                    |         |
| 16-44                      | 216 (189, 242) | 1                  |         | 479 (440, 517)  | 1                 |         | 327 (295, 360) | 1                  |         |
| >=45                       | 39 (26, 52)    | 0.18 (0.13, 0.26)  | <0.0001 | 93 (74, 112)    | 0.19 (0.16, 0.24) | <0.0001 | 150 (127, 173) | 0.46 (0.38, 0.55)  | <0.0001 |
| <b>Ethnicity</b>           |                |                    |         |                 |                   |         |                |                    |         |
| White                      | 120 (100, 140) | 1                  |         | 270 (239, 301)  | 1                 |         | 170 (144, 195) | 1                  |         |
| Asian                      | 199 (117, 280) | 1.65 (1.09, 2.51)  |         | 261 (183, 339)  | 0.97 (0.70, 1.33) |         | 190 (126, 254) | 1.12 (0.78, 1.62)  |         |
| Black African              | 415 (234, 596) | 3.46 (2.21, 5.43)  | <0.0001 | 825 (602, 1048) | 3.06 (2.29, 4.08) | <0.0001 | 728 (527, 929) | 4.30 (3.13, 5.87)  | <0.0001 |
| Black Caribbean            | 248 (96, 400)  | 2.06 (1.15, 3.72)  |         | 438 (260, 617)  | 1.63 (1.06, 2.48) |         | 399 (221, 578) | 2.35 (1.50, 3.70)  |         |
| <b>Patient IMD (2015)*</b> |                |                    |         |                 |                   |         |                |                    |         |
| Quintile 1                 | 153 (112, 194) | 1                  |         | 172 (130, 215)  | 1                 |         | 156 (115, 197) | 1                  |         |
| Quintiles 2,3,4            | 125 (106, 143) | 0.82 (0.60, 1.10)  | 0.0278  | 284 (258, 311)  | 1.65 (1.27, 2.14) | <0.0001 | 195 (173, 218) | 1.25 (0.95, 1.66)  | <0.0001 |
| Quintile 5                 | 183 (138, 227) | 1.19 (0.84, 1.71)  |         | 539 (463, 615)  | 3.13 (2.37, 4.14) |         | 520 (448, 592) | 3.33 (2.50, 4.46)  |         |
| Outside London             |                |                    |         |                 |                   |         |                |                    |         |
|                            | 2005           | 2005               |         | 2010            | 2010              |         | 2015           | 2015               |         |
|                            | Rate (95% CI)  | IRR (95% CI)       | p-value | Rate (95% CI)   | IRR (95% CI)      | p-value | Rate (95% CI)  | IRR (95% CI)       | p-value |
| <b>Overall</b>             | 67 (62, 71)    | -                  | -       | 117 (111, 123)  | -                 | -       | 83 (78, 89)    | -                  | -       |
| <b>Age</b>                 |                |                    |         |                 |                   |         |                |                    |         |
| 16-44                      | 118 (108, 127) | 1                  |         | 216 (204, 229)  | 1                 |         | 160 (148, 171) | 1                  |         |
| >=45                       | 21 (17, 24)    | 0.18 (0.15, 0.21)  | <0.0001 | 34 (29, 38)     | 0.16 (0.14, 0.18) | <0.0001 | 29 (25, 33)    | 0.18 (0.16, 0.21)  | <0.0001 |
| <b>Ethnicity</b>           |                |                    |         |                 |                   |         |                |                    |         |
| White                      | 67 (61, 72)    | 1                  |         | 117 (110, 125)  | 1                 |         | 77 (71, 83)    | 1                  |         |
| Asian                      | 188 (123, 252) | 2.82 (2.01, 3.95)  |         | 357 (284, 430)  | 3.04 (2.46, 3.77) |         | 207 (155, 259) | 2.69 (2.07, 3.50)  |         |
| Black African              | 515 (270, )    | 7.33 (4.77, 12.53) | <0.0001 | 829 (563, 1094) | 7.07 (5.13, 9.73) | <0.0001 | 432 (249, 616) | 5.63 (3.71, 8.53)  | <0.0001 |
| Black Caribbean            | 235 (61, 409)  | 3.53 (1.68, 7.44)  |         | 778 (468, 1087) | 6.63 (4.49, 9.79) |         | 489 (257, 721) | 6.36 (3.93, 10.30) |         |
| <b>Patient IMD (2015)*</b> |                |                    |         |                 |                   |         |                |                    |         |
| Quintile 1                 | 64 (54, 73)    | 1                  |         | 95 (84, 106)    | 1                 |         | 71 (61, 81)    | 1                  |         |
| Quintiles 2,3,4            | 61 (55, 67)    | 0.97 (0.81, 1.15)  | 0.0001  | 95 (88, 102)    | 1.00 (0.87, 1.15) | <0.0001 | 72 (65, 78)    | 1.01 (0.86, 1.19)  | <0.0001 |
| Quintile 5                 | 92 (77, 107)   | 1.45 (1.17, 1.79)  |         | 241 (218, 265)  | 2.54 (2.19, 2.95) |         | 152 (134, 170) | 2.15 (1.80, 2.57)  |         |
| <b>Urban/Rural class</b>   |                |                    |         |                 |                   |         |                |                    |         |
| Conurbation                | 54 (45, 64)    | 1                  |         | 165 (148, 181)  | 1                 |         | 120 (106, 133) | 1                  |         |
| City/Town                  | 72 (66, 78)    | 1.33 (1.10, 1.60)  | 0.0078  | 108 (101, 116)  | 0.66 (0.59, 0.74) | <0.0001 | 77 (70, 83)    | 0.64 (0.56, 0.74)  | <0.0001 |
| Rural                      | 62 (50, 74)    | 1.15 (0.89, 1.47)  |         | 85 (71, 99)     | 0.52 (0.43, 0.62) |         | 60 (48, 72)    | 0.50 (0.40, 0.62)  |         |

\*1=least deprived - 5=most deprived

Table 4: Prevalence (with 95% CI) of diagnosed HIV recorded in CPRD (per 100,000 persons) by gender, age, ethnicity and patient IMD, for London and outside London.

| <b>London</b>             |                            |                   |                   |
|---------------------------|----------------------------|-------------------|-------------------|
|                           | <b>Prevalence (95% CI)</b> |                   |                   |
|                           | <b>2005</b>                | <b>2010</b>       | <b>2015</b>       |
| All                       | 140 (129, 151)             | 230 (216, 244)    | 282 (267, 297)    |
| <b>Gender</b>             |                            |                   |                   |
| Males                     | 191 (172, 209)             | 294 (271, 317)    | 369 (344, 395)    |
| Females                   | 91 (78, 103)               | 170 (153, 187)    | 199 (181, 217)    |
| <b>Age</b>                |                            |                   |                   |
| 16-44                     | 168 (152, 184)             | 234 (215, 253)    | 229 (210, 249)    |
| >44                       | 103 (88, 117)              | 226 (205, 247)    | 341 (316, 365)    |
| <b>Ethnicity</b>          |                            |                   |                   |
| White                     | 127 (112, 143)             | 183 (164, 202)    | 224 (202, 246)    |
| Asian                     | 45 (17, 72)                | 84 (50, 119)      | 96 (60, 131)      |
| Black African             | 1465 (1205, 1726)          | 2350 (2055, 2646) | 2597 (2294, 2899) |
| Black Caribbean           | 195 (97, 294)              | 431 (291, 572)    | 538 (381, 695)    |
| <b>Patient IMD (2015)</b> |                            |                   |                   |
| Quantile 1                | 32 (19, 45)                | 86 (65, 107)      | 121 (96, 146)     |
| Quantiles 2,3,4           | 136 (122, 149)             | 212 (195, 228)    | 256 (238, 274)    |
| Quantile 5                | 268 (230, 306)             | 444 (397, 491)    | 544 (492, 596)    |
| <b>Outside London</b>     |                            |                   |                   |
|                           | <b>Prevalence (95% CI)</b> |                   |                   |
|                           | <b>2005</b>                | <b>2010</b>       | <b>2015</b>       |
| All                       | 38 (36, 41)                | 64 (61, 67)       | 81 (77, 85)       |
| <b>Gender</b>             |                            |                   |                   |
| Males                     | 50 (46, 54)                | 81 (76, 86)       | 105 (99, 110)     |
| Females                   | 26 (23, 29)                | 48 (44, 52)       | 58 (54, 62)       |
| <b>Age</b>                |                            |                   |                   |
| 16-44                     | 55 (51, 59)                | 78 (72, 83)       | 82 (76, 87)       |
| >44                       | 22 (19, 25)                | 52 (48, 56)       | 80 (76, 85)       |
| <b>Ethnicity</b>          |                            |                   |                   |
| White                     | 29 (26, 32)                | 46 (43, 50)       | 60 (56, 64)       |
| Asian                     | 37 (16, 59)                | 40 (21, 59)       | 55 (34, 76)       |
| Black African             | 2537 (2110, 2964)          | 3663 (3236, 4091) | 3933 (3514, 4353) |
| Black Caribbean           | 135 (35, 236)              | 347 (195, 499)    | 484 (308, 660)    |
| <b>Patient IMD (2015)</b> |                            |                   |                   |
| Quantile 1                | 19 (16, 23)                | 31 (26, 35)       | 42.58 (37, 48)    |
| Quantiles 2,3,4           | 35 (32, 38)                | 60 (56, 65)       | 77 (72, 81)       |
| Quantile 5                | 82 (72, 91)                | 132 (121, 144)    | 159 (146, 172)    |

1 Figure legends:

2  
3 Figure 1: Trend in HIV testing rates per 100,000 person years for the period 2000-2015 by gender  
4 and age group, with and without inclusion of antenatal testing.  
5

6  
7  
8 Figure 2: Trend in the percentage of HIV tests that were positive for the period 2000-2015 by gender  
9 and age group, with and without inclusion of antenatal testing.  
10

11  
12  
13  
14  
15  
16  
17  
18  
19  
20  
21  
22  
23  
24  
25  
26  
27  
28  
29  
30  
31  
32  
33  
34  
35  
36  
37  
38  
39  
40  
41  
42  
43  
44  
45  
46  
47  
48  
49  
50  
51  
52  
53  
54  
55  
56  
57  
58  
59  
60

For peer review only

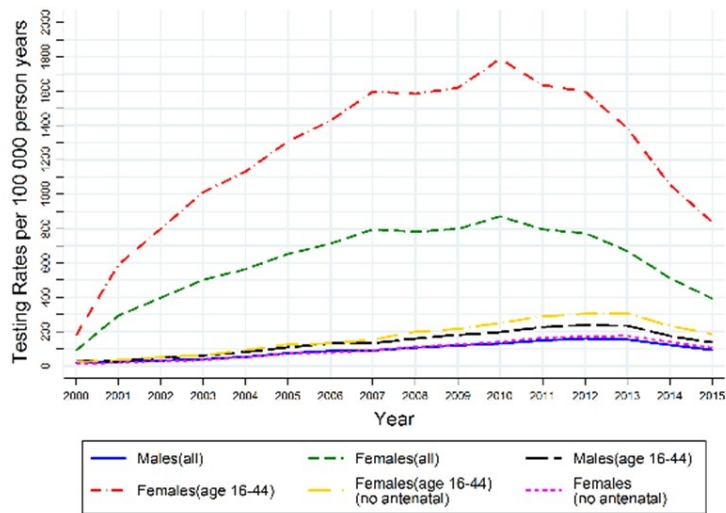

Figure 1 : Trend in HIV testing rates per 100,000 person years for the period 2000-2015 by gender and age group, with and without inclusion of antenatal testing

90x90mm (300 x 300 DPI)

1  
2  
3  
4  
5  
6  
7  
8  
9  
10  
11  
12  
13  
14  
15  
16  
17  
18  
19  
20  
21  
22  
23  
24  
25  
26  
27  
28  
29  
30  
31  
32  
33  
34  
35  
36  
37  
38  
39  
40  
41  
42  
43  
44  
45  
46  
47  
48  
49  
50  
51  
52  
53  
54  
55  
56  
57  
58  
59  
60



Figure 2: Trend in the percentage of HIV tests that were positive for the period 2000-2015 by gender and age group, with and without inclusion of antenatal testing.

283x207mm (300 x 300 DPI)



Supplementary figure: Trend (unsmoothed graph) in the percentage of HIV tests that were positive for the period 2000-2015 by gender and age group, with and without inclusion of antenatal testing.

283x207mm (300 x 300 DPI)

Trends in HIV testing in the UK Primary Care setting: A 15 year retrospective cohort study 2000 to 2015

Supplementary tables

Supplementary table 1: HIV testing rates (per 100,000 person years) for years 2000-2015 (adults >16 years).

| Year | Males, all |       |                 | Females, all |       |                 | Females, excluding antenatal |       |                 |
|------|------------|-------|-----------------|--------------|-------|-----------------|------------------------------|-------|-----------------|
|      | N          | Rate  | 95% C.I.        | N            | Rate  | 95% C.I.        | N                            | Rate  | 95% C.I.        |
| 2000 | 1277056    | 16.4  | (14.2 , 18.7)   | 1332528      | 89.0  | (83.9 , 94.1)   | 1331517                      | 12.8  | (10.8 , 14.7)   |
| 2001 | 1299140    | 21.9  | (19.3 , 24.4)   | 1352604      | 293.1 | (283.9 , 302.3) | 1348950                      | 20.2  | (17.8 , 22.7)   |
| 2002 | 1317701    | 31.4  | (28.3 , 34.5)   | 1367949      | 396.3 | (385.7 , 406.9) | 1363158                      | 28.7  | (25.8 , 31.6)   |
| 2003 | 1341378    | 39.9  | (36.5 , 43.3)   | 1388107      | 501.9 | (490.0 , 513.7) | 1382140                      | 36.5  | (33.3 , 39.8)   |
| 2004 | 1359662    | 52.5  | (48.6 , 56.4)   | 1403681      | 563.0 | (550.5 , 575.5) | 1397351                      | 54.7  | (50.7 , 58.7)   |
| 2005 | 1374451    | 74.2  | (69.6 , 78.8)   | 1418325      | 653.1 | (639.7 , 666.6) | 1411272                      | 77.0  | (72.3 , 81.6)   |
| 2006 | 1390451    | 87.5  | (82.5 , 92.4)   | 1433622      | 711.6 | (697.7 , 725.6) | 1426111                      | 80.9  | (76.0 , 85.7)   |
| 2007 | 1405428    | 89.4  | (84.3 , 94.4)   | 1447828      | 795.2 | (780.5 , 809.9) | 1439651                      | 94.3  | (89.1 , 99.4)   |
| 2008 | 1409645    | 106.6 | (101.1 , 112.1) | 1455081      | 781.9 | (767.4 , 796.5) | 1447676                      | 113.1 | (107.4 , 118.7) |
| 2009 | 1418613    | 120.0 | (114.3 , 125.8) | 1463654      | 797.9 | (783.2 , 812.6) | 1456530                      | 128.6 | (122.6 , 134.6) |
| 2010 | 1424751    | 130.2 | (124.2 , 136.2) | 1470650      | 870.7 | (855.4 , 886.0) | 1463009                      | 145.3 | (139.0 , 151.6) |
| 2011 | 1421140    | 147.2 | (140.8 , 153.6) | 1474837      | 795.9 | (781.2 , 810.5) | 1468256                      | 169.0 | (162.1 , 175.8) |
| 2012 | 1427981    | 159.5 | (152.9 , 166.2) | 1482930      | 772.8 | (758.4 , 787.1) | 1476875                      | 176.7 | (169.7 , 183.6) |
| 2013 | 1430211    | 152.9 | (146.4 , 159.4) | 1486620      | 669.5 | (656.2 , 682.9) | 1481702                      | 178.9 | (171.9 , 185.9) |
| 2014 | 1436279    | 121.6 | (115.8 , 127.4) | 1487194      | 511.7 | (500.1 , 523.4) | 1483581                      | 141.8 | (135.6 , 148.1) |
| 2015 | 1421880    | 92.5  | (87.4 , 97.6)   | 1472023      | 391.5 | (381.2 , 401.7) | 1469400                      | 108.4 | (103.0 , 113.9) |



Supplementary table 2: HIV testing rates (per 100,000 person years) for years 2000-2015 (adults aged 16-44 years).

| Year | Males, all |       |                 | Females, all |        |                   | Females, excluding antenatal |       |                 |
|------|------------|-------|-----------------|--------------|--------|-------------------|------------------------------|-------|-----------------|
|      | N          | Rate  | 95% C.I.        | N            | Rate   | 95% C.I.          | N                            | Rate  | 95% C.I.        |
| 2000 | 671088     | 25.5  | (21.6 , 29.4)   | 655488       | 177.4  | (167.2 , 187.7)   | 654477                       | 22.5  | (18.8 , 26.1)   |
| 2001 | 681216     | 31.9  | (27.6 , 36.2)   | 665358       | 589.8  | (571.2 , 608.3)   | 661708                       | 35.8  | (31.2 , 40.4)   |
| 2002 | 688746     | 46.8  | (41.5 , 52.0)   | 672213       | 799.5  | (778.0 , 821.0)   | 667427                       | 52.3  | (46.7 , 57.8)   |
| 2003 | 698982     | 60.5  | (54.7 , 66.4)   | 681748       | 1012.9 | (989.0 , 1036.9)  | 675788                       | 66.7  | (60.5 , 73.0)   |
| 2004 | 706120     | 80.9  | (74.1 , 87.6)   | 688504       | 1132.5 | (1107.2 , 1157.8) | 682186                       | 98.4  | (90.7 , 106.1)  |
| 2005 | 710489     | 107.4 | (99.7 , 115.1)  | 694232       | 1308.9 | (1281.8 , 1335.9) | 687190                       | 134.0 | (125.2 , 142.8) |
| 2006 | 714842     | 131.1 | (122.6 , 139.6) | 700086       | 1428.5 | (1400.4 , 1456.7) | 692589                       | 139.8 | (130.7 , 148.8) |
| 2007 | 717434     | 133.5 | (124.9 , 142.2) | 704167       | 1598.2 | (1568.4 , 1627.9) | 696009                       | 160.6 | (151.0 , 170.3) |
| 2008 | 711542     | 159.1 | (149.7 , 168.5) | 702985       | 1586.6 | (1556.9 , 1616.3) | 695600                       | 206.5 | (195.4 , 217.5) |
| 2009 | 708782     | 181.0 | (170.9 , 191.1) | 700970       | 1618.4 | (1588.3 , 1648.5) | 693867                       | 225.9 | (214.3 , 237.4) |
| 2010 | 702732     | 195.7 | (185.2 , 206.2) | 696368       | 1789.0 | (1757.3 , 1820.6) | 688743                       | 262.4 | (250.0 , 274.7) |
| 2011 | 690732     | 225.9 | (214.5 , 237.2) | 689820       | 1636.2 | (1605.6 , 1666.7) | 683258                       | 301.1 | (287.7 , 314.5) |
| 2012 | 685037     | 236.9 | (225.3 , 248.6) | 685234       | 1598.0 | (1567.8 , 1628.2) | 679201                       | 313.2 | (299.6 , 326.8) |
| 2013 | 675812     | 232.6 | (221.0 , 244.2) | 677984       | 1385.4 | (1357.0 , 1413.7) | 673088                       | 315.1 | (301.4 , 328.9) |
| 2014 | 668263     | 174.8 | (164.6 , 185.0) | 667048       | 1056.2 | (1031.2 , 1081.2) | 663464                       | 238.6 | (226.5 , 250.8) |
| 2015 | 639033     | 136.6 | (127.4 , 145.9) | 638248       | 839.3  | (816.5 , 862.1)   | 635636                       | 190.1 | (179.0 , 201.1) |

1  
2  
3 **Trends in HIV testing in the UK Primary Care setting: A 15 year retrospective cohort study 2000 to**  
4 **2015**  
5  
6  
7

8 **Supplementary Material**  
9

10  
11 **Page 2 Appendix 1: Read & OXMIS codes denoting an HIV test used to identify patients who have**  
12 **ever had a HIV test recorded in primary care (Evans *et al* 2009<sup>26</sup>)**  
13

14  
15 **Page 3 Appendix 2: Read & OXMIS codes denoting HIV positive status used to identify HIV positive**  
16 **patients who have their HIV positive status recorded in primary care (Evans *et al* 2009<sup>26</sup>).**  
17

18  
19 **Page 4 Appendix 3: Pregnancy/Delivery/Abortion medcodes (Jackson *et al* <sup>50</sup>)**  
20  
21  
22  
23  
24  
25  
26  
27  
28  
29  
30  
31  
32  
33  
34  
35  
36  
37  
38  
39  
40  
41  
42  
43  
44  
45  
46  
47  
48  
49  
50  
51  
52  
53  
54  
55  
56  
57  
58  
59  
60

**Appendix 1: Read & OXMIS codes denoting an HIV test used to identify patients who have ever had a HIV test recorded in primary care (Evans *et al* 2009<sup>26</sup>)**

| Code    | READ/<br>OXMIS | Code description                                             | Certainty of<br>HIV+ test |
|---------|----------------|--------------------------------------------------------------|---------------------------|
| 6827.11 | READ           | HIV screening                                                | Definite                  |
| 43C..00 | READ           | HTLV-3 antibody test                                         | Definite                  |
| 43C..11 | READ           | Aids antibody test                                           | Definite                  |
| 43C..12 | READ           | Human immunodeficiency viral test                            | Definite                  |
| 43C1.00 | READ           | Blood sent for HTLV-3 serology                               | Definite                  |
| 43C2.00 | READ           | HTLV-3 antibody negative                                     | Definite                  |
| 43C2.11 | READ           | HIV negative                                                 | Definite                  |
| 43CZ.00 | READ           | HTLV-3 antibody NOS                                          | Definite                  |
| 43d5.00 | READ           | HIV antibody/antigen (Duo)                                   | Definite                  |
| 43d6.00 | READ           | HTLV 1 antibody level                                        | Ambiguous                 |
| 43dc.00 | READ           | HTLV 2 antibody level                                        | Ambiguous                 |
| 43h2.00 | READ           | HIV 1 PCR                                                    | Definite                  |
| 43j7.00 | READ           | HIV 1 nucleic acid detection                                 | Definite                  |
| 43V1.00 | READ           | Absolute CD4 count                                           | Definite                  |
| 43VE.00 | READ           | CD4/CD8 ratio                                                | Definite                  |
| 43VH.00 | READ           | Percentage CD4 count                                         | Definite                  |
| 43Vo.00 | READ           | Absolute CD4 (T4 cells) count                                | Definite                  |
| 43Vp.00 | READ           | Percentage CD4 (T4 cells) count                              | Definite                  |
| 43W7.00 | READ           | HIV1 antibody level                                          | Definite                  |
| 43W8.00 | READ           | HIV2 antibody level                                          | Definite                  |
| 43WK.00 | READ           | Human immunodeficiency virus antibody level                  | Definite                  |
| 4J34.00 | READ           | HIV viral load                                               | Definite                  |
| 4J35.00 | READ           | HIV p24 antigen level                                        | Definite                  |
| 4JDT.00 | READ           | HIV serology                                                 | Definite                  |
| 4JR7.00 | READ           | HIV screening test                                           | Definite                  |
| 62b..00 | READ           | Antenatal HIV screening                                      | Definite                  |
| 6827.00 | READ           | AIDS (HTLV-III) screening                                    | Definite                  |
| R109.00 | READ           | [D]Laboratory evidence of human immunodeficiency virus [HIV] | Definite                  |
| ZV01800 | READ           | [V]Human immunodeficiency virus - negative                   | Definite                  |
| ZV73700 | READ           | [V]Special screening exam for human immunodeficiency virus   | Definite                  |
| L1111PV | OXMIS          | HIV ANTIBODY TEST POSITIVE                                   | Definite                  |
| L 153P  | OXMIS          | HTVL-AIDS-III ANTIBODY TEST POSITIVE                         | Definite                  |
| L 153   | OXMIS          | HTVL-AIDS-III ANTIBODY TEST                                  | Definite                  |
| L1111NE | OXMIS          | HIV ANTIBODY TEST NEGATIVE                                   | Definite                  |
| L 153N  | OXMIS          | HTVL-AIDS-III ANTIBODY TEST NEGATIVE                         | Definite                  |
| 65VE.00 | READ           | Notification of AIDS                                         | Ambiguous                 |
| 43j8.00 | READ           | HTLV 1 nucleic acid detection                                | Ambiguous                 |

**Appendix 2: Read & OXMIS codes denoting HIV positive status used to identify HIV positive patients who have their HIV positive status recorded in primary care (Evans *et al* 2009<sup>26</sup>).**

| Code    | Read/OXMIS | Code description                                              | Certainty of HIV+ status |
|---------|------------|---------------------------------------------------------------|--------------------------|
| 65QA.00 | READ       | AIDS carrier                                                  | Definite                 |
| A789700 | READ       | HIV disease resulting other types of non-Hodgkin's lymphoma   | Definite                 |
| A789800 | READ       | HIV disease resulting in multiple malignant neoplasms         | Definite                 |
| A788.00 | READ       | Acquired immune deficiency syndrome                           | Definite                 |
| A788500 | READ       | Human immunodeficiency virus with secondary infection         | Definite                 |
| A788X00 | READ       | HIV disease resulting/unspcf infectious+parasitic disease     | Definite                 |
| A789200 | READ       | HIV disease resulting in candidiasis                          | Definite                 |
| A789500 | READ       | HIV disease resulting in Kaposi's sarcoma                     | Definite                 |
| AyuC100 | READ       | [X]HIV disease resulting in other viral infections            | Definite                 |
| AyuC700 | READ       | [X]HIV dis reslt/oth mal neopl/lymph,h'matopoetc+reltd tissu  | Definite                 |
| A788000 | READ       | Acute human immunodeficiency virus infection                  | Definite                 |
| A788100 | READ       | Asymptomatic human immunodeficiency virus infection           | Definite                 |
| A789300 | READ       | HIV disease resulting in Pneumocystis carinii pneumonia       | Definite                 |
| A789600 | READ       | HIV disease resulting in Burkitt's lymphoma                   | Definite                 |
| A798.00 | READ       | Retrovirus infection                                          | Definite                 |
| AyuC200 | READ       | [X]HIV disease resulting in other mycoses                     | Definite                 |
| AyuCA00 | READ       | [X]HIV disease resulting in multiple diseases CE              | Definite                 |
| A788U00 | READ       | HIV disease result/haematological+immunologic abnorms,NEC     | Definite                 |
| A789.00 | READ       | Human immunodef virus resulting in other disease              | Definite                 |
| AyuC000 | READ       | [X]HIV disease resulting in other bacterial infections        | Definite                 |
| AyuC800 | READ       | [X]HIV disease resulting in other malignant neoplasms         | Definite                 |
| 43C3.11 | READ       | HIV positive                                                  | Definite                 |
| A788y00 | READ       | Human immunodeficiency virus with other clinical findings     | Definite                 |
| Eu02400 | READ       | [X]Dementia in human immunodef virus [HIV] disease            | Definite                 |
| ZV01A00 | READ       | [V]Asymptomatic human immunodeficiency virus infection status | Definite                 |
| A789400 | READ       | HIV disease resulting in multiple infections                  | Definite                 |
| AyuC500 | READ       | [X]HIV disease resulting/unspcf infectious+parasitic disease  | Definite                 |
| AyuC900 | READ       | [X]HIV disease resulting in unspecified malignant neoplasm    | Definite                 |
| AyuCC00 | READ       | [X]HIV disease resulting in other specified conditions        | Definite                 |
| 43C3.00 | READ       | HTLV-3 antibody positive                                      | Definite                 |
| A788W00 | READ       | HIV disease resulting in unspecified malignant neoplasm       | Definite                 |
| A789X00 | READ       | HIV dis reslt/oth mal neopl/lymph,h'matopoetc+                | Definite                 |
| AyuC300 | READ       | [X]HIV disease resulting in multiple infections               | Definite                 |
| AyuC400 | READ       | [X]HIV disease resulting/other infectious+parasitic diseases  | Definite                 |
| AyuC600 | READ       | [X]HIV disease resulting in other non-Hodgkin's lymphoma      | Definite                 |
| A788600 | READ       | Human immunodeficiency virus with secondary cancers           | Definite                 |
| A788z00 | READ       | Acquired human immunodeficiency virus infection syndrome NOS  | Definite                 |
| A789A00 | READ       | HIV disease resulting in wasting syndrome                     | Definite                 |
| 65VE.00 | READ       | Notification of AIDS                                          | Definite                 |
| A788.11 | READ       | Human immunodeficiency virus infection                        | Definite                 |
| A788200 | READ       | HIV infection with persistent generalised lymphadenopathy     | Definite                 |
| A788300 | READ       | Human immunodeficiency virus with constitutional disease      | Definite                 |
| A788400 | READ       | Human immunodeficiency virus with neurological disease        | Definite                 |

**Appendix 2 (CONT'D): Read & OXMIS codes denoting HIV positive status used to identify HIV positive patients who have their HIV positive status recorded in primary care.**

| Code    | Read/OXMIS | Code description                                              | Certainty of HIV+ status |
|---------|------------|---------------------------------------------------------------|--------------------------|
| A788V00 | READ       | HIV disease resulting in multiple diseases CE                 | Definite                 |
| A789100 | READ       | HIV disease resulting in cytomegaloviral disease              | Definite                 |
| AyuC.00 | READ       | [X]Human immunodeficiency virus disease                       | Definite                 |
| AyuCD00 | READ       | [X]Unspecified human immunodeficiency virus [HIV] disease     | Definite                 |
| A789000 | READ       | HIV disease resulting in mycobacterial infection              | Definite                 |
| A789900 | READ       | HIV disease resulting in lymphoid interstitial pneumonitis    | Definite                 |
| AyuCB00 | READ       | [X]HIV disease result/haematological+immunologic abnorms,NEC  | Definite                 |
| R109.00 | READ       | [D]Laboratory evidence of human immunodeficiency virus [HIV]  | Definite                 |
| ZV01A00 | READ       | [V]Asymptomatic human immunodeficiency virus infection status | Definite                 |
| 799MD   | OXMIS      | AIDS                                                          | Definite                 |
| 799CA   | OXMIS      | AIDS CARRIER                                                  | Definite                 |
| L1111PV | OXMIS      | HIV ANTIBODY TEST POSITIVE                                    | Definite                 |
| L7990A  | OXMIS      | ACQUIRED IMMUNE DEFICIENCY SYNDROME                           | Definite                 |
| L 153P  | OXMIS      | HTVL-AIDS-III ANTIBODY TEST POSITIVE                          | Definite                 |
| 43V1.00 | READ       | Absolute CD4 count                                            | Ambiguous                |
| AyuD800 | READ       | [X]Retrovirus infections, not elsewhere classified            | Ambiguous                |
| AyuKM00 | READ       | [X]Retrovirus/cause of diseases classified to other chapters  | Ambiguous                |
| 43VE.00 | READ       | CD4/CD8 ratio                                                 | Ambiguous                |
| A7y0100 | READ       | Retrovirus as cause of diseases classified to other chapters  | Ambiguous                |
| 43VH.00 | READ       | Percentage CD4 count                                          | Ambiguous                |
| 4J34.00 | READ       | HIV viral load                                                | Ambiguous                |
| 4J35.00 | READ       | HIV p24 antigen level                                         | Ambiguous                |
| 43h2.00 | READ       | HIV 1 PCR                                                     | Ambiguous                |
| 43j7.00 | READ       | HIV 1 nucleic acid detection                                  | Ambiguous                |
| 43Vo.00 | READ       | Absolute CD4 (T4 cells) count                                 | Ambiguous                |
| 43Vp.00 | READ       | Percentage CD4 (T4 cells) count                               | Ambiguous                |

**Appendix 3: Pregnancy/Delivery/Abortion medcodes (Jackson *et al*<sup>50</sup>)**

| medcode | readcode | readterm                                   |
|---------|----------|--------------------------------------------|
| 52685   | ZV23000  | [V]Pregnancy with history of infertility   |
| 3030    | 4654     | Urine pregnancy test positive              |
| 73535   | L13z100  | Unspecified pregnancy vomiting - delivered |
| 53514   | Z22D300  | Uncertain viability of pregnancy           |
| 11422   | Z226.00  | Pregnancy problem                          |
| 20623   | ZV4J000  | [V]Problems related to unwanted pregnancy  |
| 99247   | L13y200  | Other pregnancy vomiting - not delivered   |
| 56451   | L13zz00  | Unspecified pregnancy vomiting NOS         |
| 14644   | L166z11  | UTI - urinary tract infection in pregnancy |
| 32975   | 6166     | Pregnant, diaphragm failure                |

|    |        |         |                                                              |
|----|--------|---------|--------------------------------------------------------------|
| 1  |        |         |                                                              |
| 2  |        |         |                                                              |
| 3  |        |         |                                                              |
| 4  | 23495  | L265.00 | Small-for-dates fetus in pregnancy                           |
| 5  | 3766   | L10..00 | Haemorrhage in early pregnancy                               |
| 6  | 56953  | Z235400 | Pendulous pregnant abdomen                                   |
| 7  | 40279  | 7E19012 | Fimbrial extraction of tubal pregnancy                       |
| 8  | 29122  | 7E19011 | Removal of ectopic pregnancy from fallopian tube             |
| 9  | 1748   | 7E08400 | Suction termination of pregnancy                             |
| 10 | 106170 | L21zz00 | Multiple pregnancy NOS                                       |
| 11 | 5357   | 7E08500 | Dilation of cervix and extraction termination of pregnancy   |
| 12 | 14899  | 621Z.00 | Patient pregnant NOS                                         |
| 13 | 61563  | L161300 | Oedema or excessive weight gain in pregnancy - not delivered |
| 14 | 64523  | L091z00 | Delayed/excess haemorrhage NOS following abortive pregnancy  |
| 15 | 20621  | ZV25313 | [V]Admission for termination of pregnancy                    |
| 16 | 20910  | ZV25311 | [V]Admission for termination of pregnancy (TOP)              |
| 17 | 70149  | L16A100 | Glycosuria during pregnancy - delivered                      |
| 18 | 54677  | L167200 | Liver disorder in pregnancy - not delivered                  |
| 19 | 102576 | L051711 | Incomplete termination of pregnancy                          |
| 20 | 36903  | 67AZ.00 | Pregnancy advice NOS                                         |
| 21 | 46448  | Q486.00 | Fetal death due to termination of pregnancy                  |
| 22 | 109697 | 6556    | Pertussis vaccination in pregnancy                           |
| 23 | 85961  | 44Cy.00 | Serum pregnancy associated plasma protein-A MoM measurement  |
| 24 | 20307  | L091.00 | Delayed/excessive haemorrhage following abortive pregnancy   |
| 25 | 37163  | L150z00 | Post-term pregnancy NOS                                      |
| 26 | 94473  | L211z00 | Triplet pregnancy NOS                                        |
| 27 | 47489  | Z22A800 | Undiagnosed pregnancy                                        |
| 28 | 1668   | L182500 | Iron deficiency anaemia of pregnancy                         |
| 29 | 61576  | L211000 | Triplet pregnancy unspecified                                |
| 30 | 25501  | Z22A100 | Low risk pregnancy                                           |
| 31 | 40633  | Z22A600 | Teenage pregnancy                                            |
| 32 | 104440 | 4Q3N.00 | Pregnancy associated plasma protein A level                  |
| 33 | 45413  | L263A11 | Maternal care for reduced fetal heart rate during pregnancy  |
| 34 | 14994  | 6174    | Pregnant, sheath failure                                     |
| 35 | 24170  | L15..00 | Prolonged or post-term pregnancy                             |
| 36 | 66390  | Q0z..00 | Maternal problem unrelated preg affecting fetus/neonate NOS  |
| 37 | 27833  | L13y.00 | Other pregnancy vomiting                                     |
| 38 | 55338  | L123000 | Transient hypertension of pregnancy unspecified              |
| 39 | 99956  | L168400 | Fatigue during pregnancy with postnatal complication         |
| 40 | 71314  | L093.00 | Renal failure following abortive pregnancy                   |
| 41 | 106735 | 9mK0.00 | Pertussis vaccination in pregnancy invitation first letter   |
| 42 | 31449  | 6294    | No A/N care: not known preg.                                 |
| 43 | 100670 | L181100 | Thyroid dysfunction during pregnancy - baby delivered        |
| 44 | 54866  | L030.00 | Abdominal pregnancy                                          |
| 45 | 38882  | L123600 | Transient hypertension of pregnancy                          |
| 46 | 61995  | L03yz00 | Other ectopic pregnancy NOS                                  |
| 47 | 5044   | 13H7.00 | Unwanted pregnancy                                           |
| 48 | 25131  | Z22AD11 | Reported conception - pregnancy                              |
| 49 |        |         |                                                              |
| 50 |        |         |                                                              |
| 51 |        |         |                                                              |
| 52 |        |         |                                                              |
| 53 |        |         |                                                              |
| 54 |        |         |                                                              |
| 55 |        |         |                                                              |
| 56 |        |         |                                                              |
| 57 |        |         |                                                              |
| 58 |        |         |                                                              |
| 59 |        |         |                                                              |
| 60 |        |         |                                                              |

|    |        |         |                                                              |
|----|--------|---------|--------------------------------------------------------------|
| 1  |        |         |                                                              |
| 2  |        |         |                                                              |
| 3  |        |         |                                                              |
| 4  | 21467  | L03y200 | Membranous pregnancy                                         |
| 5  | 48304  | L10z200 | Early pregnancy haemorrhage NOS - not delivered              |
| 6  | 37693  | 13Hd.00 | Teenage pregnancy                                            |
| 7  | 27980  | L166700 | Infections of the genital tract in pregnancy                 |
| 8  | 2638   | L1...00 | Pregnancy complications                                      |
| 9  | 99933  | L092100 | Bowel damage following abortive pregnancy                    |
| 10 | 41122  | L10zz00 | Early pregnancy haemorrhage NOS                              |
| 11 | 37348  | Lyu2500 | [X]Other specified pregnancy-related conditions              |
| 12 | 96757  | L411513 | Vulval varices in pregnancy                                  |
| 13 | 59634  | L411512 | Vaginal varices in pregnancy                                 |
| 14 | 99237  | L411511 | Perineal varices in pregnancy                                |
| 15 | 27451  | L166000 | Genitourinary tract infection in pregnancy unspecified       |
| 16 | 110129 | 6556000 | Pertussis vacc in pregnancy given by other healthcre providr |
| 17 | 107485 | Q014000 | Fetus or neonate affected by unspecified ectopic pregnancy   |
| 18 | 18258  | L167.00 | Liver disorder in pregnancy                                  |
| 19 | 42015  | L16y.00 | Other pregnancy complications                                |
| 20 | 25028  | L09z.00 | Complication NOS following abortion/ectopic/molar pregnancy  |
| 21 | 44734  | 62O8.00 | Pregnancy prolonged - 42 weeks                               |
| 22 | 23831  | ZV22y00 | [V]Other specified pregnant state                            |
| 23 | 41587  | L210z00 | Twin pregnancy NOS                                           |
| 24 | 24063  | 62O7.00 | Pregnancy prolonged - 41 weeks                               |
| 25 | 44650  | L0y..00 | Other specified pregnancy with abortive outcome              |
| 26 | 61284  | L210200 | Twin pregnancy with antenatal problem                        |
| 27 | 54288  | Z22D311 | Query viability of pregnancy                                 |
| 28 | 34938  | L212.00 | Quadruplet pregnancy                                         |
| 29 | 102494 | 8Hh3.00 | Self referral to termination of pregnancy service            |
| 30 | 1686   | 7E08600 | Termination of pregnancy NEC                                 |
| 31 | 70214  | L21z100 | Multiple pregnancy NOS - delivered                           |
| 32 | 64247  | Z235.00 | Observation of shape of pregnant abdomen                     |
| 33 | 23751  | L266.00 | Large-for-dates fetus in pregnancy                           |
| 34 | 39359  | L385.00 | Failed or difficult intubation during pregnancy              |
| 35 | 64500  | L183.11 | Pregnancy and drug dependence                                |
| 36 | 73917  | L10y200 | Other haemorrhage in early pregnancy - not delivered         |
| 37 | 255    | L05..12 | Termination of pregnancy                                     |
| 38 | 15433  | L21..00 | Multiple pregnancy                                           |
| 39 | 20439  | L123.00 | Transient hypertension of pregnancy                          |
| 40 | 16775  | L16E.00 | Pregnancy pruritus                                           |
| 41 | 53921  | L161000 | Oedema or excessive weight gain in pregnancy, unspecified    |
| 42 | 44770  | L191.00 | Continuing pregnancy after abortion of one fetus or more     |
| 43 | 29205  | 4453    | Serum pregnancy test positive                                |
| 44 | 46577  | 66AX.00 | Diabetes: shared care in pregnancy - diabetol and obstet     |
| 45 | 73455  | Q015200 | Fetus or neonate affected by triplet pregnancy               |
| 46 | 41625  | L13yz00 | Other pregnancy vomiting NOS                                 |
| 47 | 60345  | M240500 | Alopecia of pregnancy                                        |
| 48 | 107957 | 115V.00 | No history of ectopic pregnancy                              |
| 49 |        |         |                                                              |
| 50 |        |         |                                                              |
| 51 |        |         |                                                              |
| 52 |        |         |                                                              |
| 53 |        |         |                                                              |
| 54 |        |         |                                                              |
| 55 |        |         |                                                              |
| 56 |        |         |                                                              |
| 57 |        |         |                                                              |
| 58 |        |         |                                                              |
| 59 |        |         |                                                              |
| 60 |        |         |                                                              |

|    |        |         |                                                              |
|----|--------|---------|--------------------------------------------------------------|
| 1  |        |         |                                                              |
| 2  |        |         |                                                              |
| 3  | 6580   | ZV23800 | [V]Supervision of high-risk pregnancy due to social problems |
| 4  | 61182  | L211100 | Triplet pregnancy - delivered                                |
| 5  | 30365  | Z22AA00 | Wanted pregnancy                                             |
| 6  | 26852  | ZV23400 | [V]Pregnancy with other poor obstetric history               |
| 7  | 30817  | 6212    | Pregnant - blood test confirms                               |
| 8  | 72014  | L212z00 | Quadruplet pregnancy NOS                                     |
| 9  | 12521  | L161.11 | Excessive weight gain in pregnancy                           |
| 10 | 41959  | L171300 | Maternal gonorrhoea in pregnancy - baby not yet delivered    |
| 11 | 26201  | Z22AC00 | Pregnancy with uncertain dates                               |
| 12 | 49519  | Z229.00 | Observation of position of pregnancy                         |
| 13 | 107713 | L21y200 | Other multiple pregnancy with antenatal problem              |
| 14 | 36235  | 67A4.00 | Pregnancy exercise advice                                    |
| 15 | 105511 | L21z.00 | Multiple pregnancy NOS                                       |
| 16 | 65783  | L030000 | Delivery of viable fetus in abdominal pregnancy              |
| 17 | 106267 | L03y300 | Combined or heterotopic pregnancy                            |
| 18 | 2278   | 8M6..00 | Requests pregnancy termination                               |
| 19 | 110448 | Lyu0.00 | [X]Pregnancy with abortive outcome                           |
| 20 | 99006  | Q014100 | Fetus or neonate affected by abdominal ectopic pregnancy     |
| 21 | 40357  | L2D..00 | Retained intrauterine contraceptive device in pregnancy      |
| 22 | 54293  | Q015.00 | Fetus or neonate affected by multiple pregnancy              |
| 23 | 22557  | Z22B100 | Single pregnancy                                             |
| 24 | 15338  | 621A.00 | Pregnancy unplanned ? wanted                                 |
| 25 | 6649   | L166800 | Urinary tract infection complicating pregnancy               |
| 26 | 49855  | Q015100 | Fetus or neonate affected by twin pregnancy                  |
| 27 | 40825  | Z22B800 | Undiagnosed multiple pregnancy                               |
| 28 | 35509  | 624..00 | A/N care: precious pregnancy                                 |
| 29 | 20197  | L211.00 | Triplet pregnancy                                            |
| 30 | 46270  | ZV22z00 | [V]Unspecified pregnant state                                |
| 31 | 67098  | L183300 | Drug dependence during pregnancy - baby not yet delivered    |
| 32 | 23373  | L150.00 | Post-term pregnancy                                          |
| 33 | 1357   | L210100 | Twin pregnancy - delivered                                   |
| 34 | 45729  | Z22D.00 | Observation of viability of pregnancy                        |
| 35 | 44733  | L0z..00 | Pregnancy with abortive outcome NOS                          |
| 36 | 11760  | L13z.00 | Unspecified pregnancy vomiting                               |
| 37 | 18500  | Z22D100 | Viable pregnancy                                             |
| 38 | 69686  | L417000 | Cerebral venous thrombosis in pregnancy                      |
| 39 | 53661  | L13z200 | Unspecified pregnancy vomiting - not delivered               |
| 40 | 22183  | 957..11 | Prescription exempt form-preg                                |
| 41 | 106378 | 9mK..00 | Pertussis vaccination in pregnancy invitation                |
| 42 | 12230  | L263900 | Maternal care for fetal tachycardia during pregnancy         |
| 43 | 22193  | Z229100 | Intrauterine pregnancy                                       |
| 44 | 15061  | L13..12 | Hyperemesis of pregnancy                                     |
| 45 | 14877  | 621B.00 | Pregnant - ? planned                                         |
| 46 | 27672  | 7E13100 | Excision of ectopic ovarian pregnancy                        |
| 47 | 1744   | L03..00 | Ectopic pregnancy                                            |
| 48 |        |         |                                                              |
| 49 |        |         |                                                              |
| 50 |        |         |                                                              |
| 51 |        |         |                                                              |
| 52 |        |         |                                                              |
| 53 |        |         |                                                              |
| 54 |        |         |                                                              |
| 55 |        |         |                                                              |
| 56 |        |         |                                                              |
| 57 |        |         |                                                              |
| 58 |        |         |                                                              |
| 59 |        |         |                                                              |
| 60 |        |         |                                                              |



|    |        |         |                                                              |
|----|--------|---------|--------------------------------------------------------------|
| 1  |        |         |                                                              |
| 2  |        |         |                                                              |
| 3  |        |         |                                                              |
| 4  | 5693   | L16A.00 | Glycosuria during pregnancy                                  |
| 5  | 36394  | L16C.00 | Pregnancy induced oedema+proteinuria without hypertension    |
| 6  | 73914  | L412511 | Thrombophlebitis of legs in pregnancy                        |
| 7  | 53849  | L16y000 | Other pregnancy complication unspecified                     |
| 8  |        |         |                                                              |
| 9  | 105943 | L165300 | Asymptomatic bacteriuria in pregnancy - not delivered        |
| 10 | 36421  | L167z00 | Liver disorder in pregnancy NOS                              |
| 11 | 25872  | L16yz00 | Other pregnancy complication NOS                             |
| 12 | 60309  | Q0y..00 | Maternal problems unrelated preg affecting fetus/neonate OS  |
| 13 | 67728  | L150200 | Post-term pregnancy - not delivered                          |
| 14 | 28103  | Z22A300 | Concealed pregnancy                                          |
| 15 | 21849  | L031.00 | Tubal pregnancy                                              |
| 16 |        |         |                                                              |
| 17 | 54577  | L210000 | Twin pregnancy unspecified                                   |
| 18 | 105654 | L10y100 | Other haemorrhage in early pregnancy - delivered             |
| 19 | 53685  | L410500 | Varicose veins of legs in pregnancy                          |
| 20 | 68930  | L168100 | Fatigue during pregnancy - delivered                         |
| 21 | 68840  | L416200 | Haemorrhoids in pregnancy and puerperium - deliv + p/n comp  |
| 22 | 53167  | L188300 | Abnormal GTT during pregnancy - baby not yet delivered       |
| 23 | 45862  | 7E07114 | Curettage of uterus for termination of pregnancy NEC         |
| 24 | 64366  | L412500 | Superficial thrombophlebitis in pregnancy                    |
| 25 | 13968  | 584D.00 | Antenatal ultrasound confirms intra-uterine pregnancy        |
| 26 | 14925  | L10z.00 | Early pregnancy haemorrhage NOS                              |
| 27 | 61935  | L185.11 | Congenital heart disease in pregnancy                        |
| 28 | 103059 | 7E07111 | Curettage of term pregnancy NEC                              |
| 29 | 16384  | 7E07113 | Curettage of uterus for termination of pregnancy NEC         |
| 30 | 23421  | 615C.00 | IUD failure - pregnant                                       |
| 31 | 3029   | L166500 | Infections of kidney in pregnancy                            |
| 32 | 106517 | L176100 | Other maternal viral disease in pregnancy - baby delivered   |
| 33 | 40964  | L192.00 | Continuing preg after intrauterine death one fetus or more   |
| 34 | 1850   | 7F06012 | Shirodkar suture in pregnancy                                |
| 35 | 30302  | 7F...12 | Pregnancy operations                                         |
| 36 | 28107  | L161.00 | Oedema or excessive weight gain in pregnancy no hypertension |
| 37 | 85960  | 44Cz.00 | Plasma pregnancy associated plasma protein-A MoM             |
| 38 | 44057  | ZV23111 | [V]Pregnancy with history of hydatidiform mole               |
| 39 | 37573  | Z22B900 | Continuing pregnancy after abortion of sibling fetus         |
| 40 | 68694  | Z22C.00 | Observation of measures of pregnancy                         |
| 41 | 49559  | L180300 | Diabetes mellitus during pregnancy - baby not yet delivered  |
| 42 | 29786  | L416600 | Haemorrhoids in pregnancy                                    |
| 43 | 57059  | L187300 | Orthopaedic disorder in pregnancy - baby not yet delivered   |
| 44 | 23334  | L162.11 | Albuminuria in pregnancy without hypertension                |
| 45 | 92579  | L162.13 | Uraemia in pregnancy without hypertension                    |
| 46 | 38312  | L162.12 | Nephropathy NOS in pregnancy without hypertension            |
| 47 | 22215  | Z22A200 | High risk pregnancy                                          |
| 48 | 38346  | ZV22000 | [V]First normal pregnancy supervision                        |
| 49 | 15318  | 6214    | Pregnant - on history                                        |
| 50 | 41504  | L13y000 | Other pregnancy vomiting unspecified                         |
| 51 |        |         |                                                              |
| 52 |        |         |                                                              |
| 53 |        |         |                                                              |
| 54 |        |         |                                                              |
| 55 |        |         |                                                              |
| 56 |        |         |                                                              |
| 57 |        |         |                                                              |
| 58 |        |         |                                                              |
| 59 |        |         |                                                              |
| 60 |        |         |                                                              |

|    |        |         |                                                              |
|----|--------|---------|--------------------------------------------------------------|
| 1  |        |         |                                                              |
| 2  |        |         |                                                              |
| 3  |        |         |                                                              |
| 4  | 72019  | L132200 | Late pregnancy vomiting - not delivered                      |
| 5  | 37386  | 8B68.00 | Pregnancy prophylactic therapy                               |
| 6  | 60877  | L263800 | Maternal care for fetal decelerations during pregnancy       |
| 7  | 107225 | L165z00 | Asymptomatic bacteriuria in pregnancy NOS                    |
| 8  | 54942  | L123100 | Transient hypertension of pregnancy - delivered              |
| 9  | 54701  | ZV23y00 | [V]Other specified high-risk pregnancy                       |
| 10 | 63825  | Q014.00 | Fetus or neonate affected by ectopic pregnancy               |
| 11 | 94804  | 67AB.00 | Preg. prescription exempt adv.                               |
| 12 | 72835  | Q01z.00 | Fetus/neonate affected by maternal complic pregnancy NOS     |
| 13 | 99008  | Q014300 | Fetus or neonate affected by tubal ectopic pregnancy         |
| 14 | 110868 | L181000 | Thyroid dysfunction - unspec whether in pregnancy/puerperium |
| 15 | 66649  | L41z500 | Venous complication of pregnancy, unspecified                |
| 16 | 26286  | L18A000 | Cholestasis of pregnancy                                     |
| 17 | 17947  | 62a..00 | Pregnancy review                                             |
| 18 | 103104 | L176300 | Other maternal viral dis.in pregnancy-baby not yet delivered |
| 19 | 109932 | Z235211 | Globular pregnant abdomen                                    |
| 20 | 68004  | Q01..00 | Fetus/neonate affected by maternal complication of pregnancy |
| 21 | 20240  | 6216    | Pregnant - planned                                           |
| 22 | 65834  | ZV23200 | [V]Pregnancy with history of abortion                        |
| 23 | 7916   | Z254500 | Delivered by caesarean section - pregnancy at term           |
| 24 | 21119  | L182300 | Anaemia during pregnancy - baby not yet delivered            |
| 25 | 9408   | L10y.11 | Bleeding in early pregnancy                                  |
| 26 | 64099  | L168000 | Fatigue during pregnancy unspecified                         |
| 27 | 10278  | L180800 | Diabetes mellitus arising in pregnancy                       |
| 28 | 2602   | L166.11 | Cystitis of pregnancy                                        |
| 29 | 13165  | 621..00 | Patient currently pregnant                                   |
| 30 | 9986   | Z212.11 | Pregnancy care                                               |
| 31 | 66594  | L186.11 | Heart disease during pregnancy                               |
| 32 | 35158  | Z225.00 | Normal pregnancy                                             |
| 33 | 93800  | Z235100 | Ovoid pregnant abdomen                                       |
| 34 | 73727  | L168z00 | Fatigue during pregnancy NOS                                 |
| 35 | 55889  | L175300 | Maternal rubella during pregnancy - baby not yet delivered   |
| 36 | 7517   | 621C.00 | Unplanned pregnancy                                          |
| 37 | 53908  | Lyu0000 | [X]Other ectopic pregnancy                                   |
| 38 | 34173  | L12B.00 | Proteinuric hypertension of pregnancy                        |
| 39 | 35514  | 624Z.00 | A/N care: precious preg. NOS                                 |
| 40 | 15065  | 8B7..11 | Pregnancy vitamin/iron prophyl                               |
| 41 | 109465 | L184300 | Mental disorder during pregnancy - baby not yet delivered    |
| 42 | 24038  | 13S..00 | Pregnancy benefits                                           |
| 43 | 16215  | 6211    | Pregnant - urine test confirms                               |
| 44 | 35592  | 6213    | Pregnant - V.E. confirms                                     |
| 45 | 25254  | Z21..00 | Care relating to reproduction and pregnancy                  |
| 46 | 46609  | Z22C800 | Number of lost pregnancies                                   |
| 47 | 29692  | 615C.11 | Pregnant, IUD failure                                        |
| 48 | 50440  | Z22A500 | Biochemical pregnancy                                        |
| 49 |        |         |                                                              |
| 50 |        |         |                                                              |
| 51 |        |         |                                                              |
| 52 |        |         |                                                              |
| 53 |        |         |                                                              |
| 54 |        |         |                                                              |
| 55 |        |         |                                                              |
| 56 |        |         |                                                              |
| 57 |        |         |                                                              |
| 58 |        |         |                                                              |
| 59 |        |         |                                                              |
| 60 |        |         |                                                              |

|    |        |         |                                                       |
|----|--------|---------|-------------------------------------------------------|
| 1  |        |         |                                                       |
| 2  |        |         |                                                       |
| 3  |        |         |                                                       |
| 4  | 56252  | ZV22100 | [V]Other normal pregnancy supervision                 |
| 5  | 21196  | ZV23.00 | [V]High-risk pregnancy supervision                    |
| 6  | 30618  | Z22AB00 | Unplanned pregnancy                                   |
| 7  | 10775  | 8B74.00 | Iron supplement in pregnancy                          |
| 8  | 48534  | ZV23100 | [V]Pregnancy with history of trophoblastic disease    |
| 9  | 73559  | L13z000 | Unspecified pregnancy vomiting unspecified            |
| 10 | 13984  | 584E.00 | Antenatal ultrasound confirms ectopic pregnancy       |
| 11 | 9754   | Z22A400 | Early stage of pregnancy                              |
| 12 | 67893  | L2C..00 | Malnutrition in pregnancy                             |
| 13 | 70993  | L16Az00 | Glycosuria during pregnancy NOS                       |
| 14 | 23438  | L2z..00 | Risk factors in pregnancy NOS                         |
| 15 | 105694 | ZVu2300 | [X]Supervision of other normal pregnancy              |
| 16 | 53097  | Z22C313 | Duration of pregnancy                                 |
| 17 | 58156  | L03y.00 | Other ectopic pregnancy                               |
| 18 | 55730  | ZV22.11 | [V]Supervision of normal pregnancy                    |
| 19 | 5709   | 62...13 | Pregnancy care                                        |
| 20 | 100104 | 95B..00 | Health in Pregnancy grant claim form issued           |
| 21 | 72883  | Lyu2100 | [X]Other vomiting complicating pregnancy              |
| 22 | 59588  | L411500 | Genital varices in pregnancy                          |
| 23 | 67863  | Z22B.00 | Observation of quantity of pregnancy                  |
| 24 | 12890  | Z227.00 | Confirmation of pregnancy                             |
| 25 | 47080  | L162.00 | Unspecified renal disease in pregnancy                |
| 26 | 3191   | L16y500 | Abdominal pain in pregnancy                           |
| 27 | 27740  | L16..00 | Other pregnancy complication NEC                      |
| 28 | 67698  | L150000 | Post-term pregnancy unspecified                       |
| 29 | 29623  | 62H4.00 | Rh screen - 2nd preg. sample                          |
| 30 | 21438  | 7E08411 | Vacuum termination of pregnancy                       |
| 31 | 51298  | 6215    | Pregnant - on abdom. palpation                        |
| 32 | 35912  | ZV22200 | [V]Pregnancy confirmed                                |
| 33 | 99980  | L168300 | Fatigue during pregnancy - not delivered              |
| 34 | 29593  | 6223    | Antenatal care: 3rd pregnancy                         |
| 35 | 49407  | L2B..00 | Low weight gain in pregnancy                          |
| 36 | 52583  | L168.00 | Fatigue during pregnancy                              |
| 37 | 69599  | L21y.00 | Other multiple pregnancy                              |
| 38 | 39117  | L126500 | Eclampsia in pregnancy                                |
| 39 | 863    | L398200 | Caesarean section - pregnancy at term                 |
| 40 | 90776  | 62a..11 | Review of pregnancy                                   |
| 41 | 91254  | Z235200 | Rounded pregnant abdomen                              |
| 42 | 109416 | 62H5.00 | Rh screen - 3rd preg. sample                          |
| 43 | 69815  | 62H3.00 | Rh screen - 1st preg. sample                          |
| 44 | 11989  | 8HHV.00 | Referral for termination of pregnancy                 |
| 45 | 37701  | Z22A.00 | Observation of pattern of pregnancy                   |
| 46 | 33441  | L511.00 | Maternal care for viable fetus in abdominal pregnancy |
| 47 | 106957 | 9Nif.00 | Did not attend pertussis vaccination in pregnancy     |
| 48 | 24603  | L10y.00 | Other haemorrhage in early pregnancy                  |
| 49 |        |         |                                                       |
| 50 |        |         |                                                       |
| 51 |        |         |                                                       |
| 52 |        |         |                                                       |
| 53 |        |         |                                                       |
| 54 |        |         |                                                       |
| 55 |        |         |                                                       |
| 56 |        |         |                                                       |
| 57 |        |         |                                                       |
| 58 |        |         |                                                       |
| 59 |        |         |                                                       |
| 60 |        |         |                                                       |

|    |        |         |                                                             |
|----|--------|---------|-------------------------------------------------------------|
| 1  |        |         |                                                             |
| 2  |        |         |                                                             |
| 3  |        |         |                                                             |
| 4  | 47608  | L177.00 | Infections of bladder in pregnancy                          |
| 5  | 63751  | L16A300 | Glycosuria during pregnancy - not delivered                 |
| 6  | 15418  | L166300 | Genitourinary tract infection in pregnancy - not delivered  |
| 7  | 59313  | Z22BA00 | Contin pregnancy after intrauterine death of sibling fetus  |
| 8  | 69722  | ZV23z00 | [V]Unspecified high-risk pregnancy                          |
| 9  | 14842  | 6217    | Pregnant - unplanned - wanted                               |
| 10 | 42614  | Z22..00 | Pregnancy observations                                      |
| 11 | 53490  | L178.00 | Infections of urethra in pregnancy                          |
| 12 | 43344  | ZV61800 | [V]Illegitimate pregnancy                                   |
| 13 | 10173  | Z23D200 | Pregnant abdomen observation                                |
| 14 | 52685  | ZV23000 | [V]Pregnancy with history of infertility                    |
| 15 | 50512  | L031z00 | Tubal pregnancy NOS                                         |
| 16 | 49502  | L228.00 | Multiple pregnancy with malpresentation                     |
| 17 | 50058  | 13SZ.00 | Pregnancy benefit NOS                                       |
| 18 | 69011  | L132000 | Late pregnancy vomiting unspecified                         |
| 19 | 10185  | L13..00 | Excessive pregnancy vomiting                                |
| 20 | 10184  | 67A3.00 | Pregnancy smoking advice                                    |
| 21 | 97349  | L121300 | Renal hypertension in preg/childbirth/puerp - not delivered |
| 22 | 101518 | L132z00 | Late pregnancy vomiting NOS                                 |
| 23 | 71730  | L123300 | Transient hypertension of pregnancy - not delivered         |
| 24 | 31162  | L165.00 | Asymptomatic bacteriuria in pregnancy                       |
| 25 | 52048  | Z22AB11 | Accidental pregnancy                                        |
| 26 | 54938  | L162000 | Unspecified renal disease in pregnancy unspecified          |
| 27 | 62358  | L167000 | Liver disorder in pregnancy unspecified                     |
| 28 | 110888 | 67lt.00 | Advice on risk harm to mother from maternl medictn dur preg |
| 29 | 38771  | Lyu2200 | [X]Other venous complications in pregnancy                  |
| 30 | 15634  | L166z00 | Genitourinary tract infection in pregnancy NOS              |
| 31 | 43000  | L16D.00 | Excessive weight gain in pregnancy                          |
| 32 | 14651  | 13H8.00 | Illegitimate pregnancy                                      |
| 33 | 108236 | 621D.00 | Concealed pregnancy                                         |
| 34 | 15033  | ZV61900 | [V]Other unwanted pregnancy                                 |
| 35 | 67164  | L18z300 | Medical condition NOS in pregnancy - baby not yet delivered |
| 36 | 93303  | ZV22400 | [V]Supervision of other normal pregnancy                    |
| 37 | 6184   | ZV22.00 | [V]Normal pregnancy                                         |
| 38 | 48281  | Z22D200 | Non-viable pregnancy                                        |
| 39 | 29746  | 8B75.00 | Vitamin supplement - pregnancy                              |
| 40 | 16611  | ZV22300 | [V]Pregnant state, incidental                               |
| 41 | 1130   | L210.00 | Twin pregnancy                                              |
| 42 | 52221  | L03y000 | Cervical pregnancy                                          |
| 43 | 59650  | Z235300 | Transversely enlarged pregnant abdomen                      |
| 44 | 69327  | L10yz00 | Other haemorrhage in early pregnancy NOS                    |
| 45 | 51956  | L212200 | Quadruplet pregnancy with antenatal problem                 |
| 46 | 10306  | Z22C314 | Weeks pregnant                                              |
| 47 | 45965  | Z22C311 | Pregnancy duration                                          |
| 48 | 26055  | L263A00 | Maternal care for fetal bradycardia during pregnancy        |
| 49 |        |         |                                                             |
| 50 |        |         |                                                             |
| 51 |        |         |                                                             |
| 52 |        |         |                                                             |
| 53 |        |         |                                                             |
| 54 |        |         |                                                             |
| 55 |        |         |                                                             |
| 56 |        |         |                                                             |
| 57 |        |         |                                                             |
| 58 |        |         |                                                             |
| 59 |        |         |                                                             |
| 60 |        |         |                                                             |

|    |        |         |                                                                |
|----|--------|---------|----------------------------------------------------------------|
| 1  |        |         |                                                                |
| 2  |        |         |                                                                |
| 3  | 61301  | L10y000 | Other haemorrhage in early pregnancy unspecified               |
| 4  | 10261  | L2...00 | Risk factors in pregnancy                                      |
| 5  | 106268 | 8IEc.00 | Pertussis vaccination in pregnancy declined                    |
| 6  | 24944  | L163300 | Pregnancy care of habitual aborter                             |
| 7  | 20118  | 62O..12 | Static weight gain pregnancy                                   |
| 8  | 58142  | L16A000 | Glycosuria during pregnancy unspecified                        |
| 9  | 61835  | L161z00 | Oedema or excessive weight gain in pregnancy NOS               |
| 10 | 23995  | L15..11 | Post-term pregnancy                                            |
| 11 | 35646  | L123z00 | Transient hypertension of pregnancy NOS                        |
| 12 | 93895  | Z22B500 | Quintuplet pregnancy                                           |
| 13 | 65256  | L164.00 | Peripheral neuritis in pregnancy                               |
| 14 | 67975  | L166.00 | Genitourinary tract infections in pregnancy                    |
| 15 | 36006  | L16z.00 | Pregnancy complication NOS                                     |
| 16 | 61466  | Z22A211 | HRP - High risk pregnancy                                      |
| 17 | 26866  | L2y..00 | Other specified risk factors in pregnancy                      |
| 18 | 35855  | L15z.00 | Prolonged pregnancy NOS                                        |
| 19 | 2937   | L175.11 | Rubella contact in pregnancy                                   |
| 20 | 50421  | Z22A900 | Unwanted pregnancy                                             |
| 21 | 37048  | 6282    | A/N care:10yrs+since last preg                                 |
| 22 | 49193  | 67A7.11 | Care of teeth advice -in preg.                                 |
| 23 | 11986  | 7E13300 | Excision of ruptured ectopic tubal pregnancy                   |
| 24 | 97034  | 67AE.00 | Folic acid advice in first trimester of pregnancy              |
| 25 | 106737 | 9mK2.00 | Pertussis vaccination in pregnancy invitation third letter     |
| 26 | 102362 | 389B.00 | Assessment for termination of pregnancy                        |
| 27 | 55618  | ZV23600 | [V]Supervise/pregnancy wth history insufficient antenatal care |
| 28 | 37038  | Z23D100 | Girth of pregnant abdomen                                      |
| 29 | 29631  | 6222    | Antenatal care: 2nd pregnancy                                  |
| 30 | 65555  | L132.00 | Late vomiting of pregnancy                                     |
| 31 | 107698 | Z236300 | Pregnant uterus displaced laterally                            |
| 32 | 4536   | 621..11 | Pregnancy confirmed                                            |
| 33 | 111540 | L415500 | Other phlebitis in pregnancy                                   |
| 34 | 32493  | Z22AD00 | Presentation of pregnancy                                      |
| 35 | 44729  | L031000 | Fallopian tube pregnancy                                       |
| 36 | 43140  | 67A2.00 | Diet in pregnancy advice                                       |
| 37 | 91888  | L181300 | Thyroid dysfunction in pregnancy - baby not yet delivered      |
| 38 | 12837  | 7F2B100 | Ultrasound monitoring of early pregnancy                       |
| 39 | 30351  | 67A6.00 | Drugs in pregnancy advice                                      |
| 40 | 15567  | 6218    | Pregnant -unplanned-not wanted                                 |
| 41 | 33724  | L03z.00 | Ectopic pregnancy NOS                                          |
| 42 | 100892 | Lyu2400 | [X]Other+unspcf genitourinary tract infection in pregnancy     |
| 43 | 127    | 62...00 | Patient pregnant                                               |
| 44 | 13672  | 8HHf.00 | Refer to early pregnancy unit                                  |
| 45 | 32073  | L0...00 | Pregnancy with abortive outcome                                |
| 46 | 64292  | L16y300 | Other pregnancy complication - not delivered                   |
| 47 | 106425 | 62NL.00 | Antenatal 31 week examination                                  |
| 48 |        |         |                                                                |
| 49 |        |         |                                                                |
| 50 |        |         |                                                                |
| 51 |        |         |                                                                |
| 52 |        |         |                                                                |
| 53 |        |         |                                                                |
| 54 |        |         |                                                                |
| 55 |        |         |                                                                |
| 56 |        |         |                                                                |
| 57 |        |         |                                                                |
| 58 |        |         |                                                                |
| 59 |        |         |                                                                |
| 60 |        |         |                                                                |

|    |        |         |                                                              |
|----|--------|---------|--------------------------------------------------------------|
| 1  |        |         |                                                              |
| 2  |        |         |                                                              |
| 3  |        |         |                                                              |
| 4  | 109543 | L332200 | Cord tangled with compression with antenatal problem         |
| 5  | 102300 | Lyu2A00 | [X]Abnormal finding on antenatal screening of mother         |
| 6  | 111263 | L230200 | Disproportion - major pelvic abnormality with antenatal prob |
| 7  | 55111  | 6B22.00 | Sure Start antenatal visit                                   |
| 8  | 13418  | 62W..00 | Antenatal blood tests                                        |
| 9  | 61533  | L270200 | Polyhydramnios with antenatal problem                        |
| 10 | 14085  | 62GB.00 | Antenatal ultrasounds scan at 4-8 weeks                      |
| 11 | 42326  | 62KZ.00 | Antenatal syphilis screen NOS                                |
| 12 | 18536  | 62b..00 | Antenatal HIV screening                                      |
| 13 | 99475  | 68b5.00 | Antenatal screening result pending                           |
| 14 | 13168  | 62NZ.00 | Antenatal examination NOS                                    |
| 15 | 63448  | Z675.00 | Antenatal class                                              |
| 16 | 100596 | 68b3.00 | Antenatal screening shows significant disorder               |
| 17 | 67926  | ZV28z00 | [V]Unspecified antenatal screening                           |
| 18 | 16613  | 584C.00 | Antenatal ultrasound result received                         |
| 19 | 23667  | L413.00 | Antenatal deep vein thrombosis                               |
| 20 | 53683  | L452300 | Obstetric nonpurulent mastitis with antenatal complication   |
| 21 | 104764 | L236200 | Hydrocephalic disproportion with antenatal problem           |
| 22 | 56967  | 9NV1.00 | Antenatal clinic                                             |
| 23 | 13417  | 62K..00 | Antenatal syphilis screen                                    |
| 24 | 108099 | L39z300 | Complications of labour and delivery NOS with antenatal prob |
| 25 | 70096  | L224200 | Transverse lie with antenatal problem                        |
| 26 | 104359 | ZVu2600 | [X]Other antenatal screening based on amniocentesis          |
| 27 | 294    | 62...11 | Antenatal care                                               |
| 28 | 104178 | Lyu2600 | [X]Other abnormal findings on antenatal screening of mother  |
| 29 | 27056  | 62GD.00 | Antenatal ultrasound scan at 17-22 weeks                     |
| 30 | 98481  | 68b4.00 | Repeat antenatal screening required                          |
| 31 | 14084  | 62GC.00 | Antenatal ultrasound scan at 9-16 weeks                      |
| 32 | 28732  | 62c..00 | Antenatal screening                                          |
| 33 | 6095   | 9N1N.00 | Seen in antenatal clinic                                     |
| 34 | 99849  | 68bA.00 | Antenatal screening, at risk couple identified               |
| 35 | 21957  | 62I..11 | AFP test - antenatal                                         |
| 36 | 73765  | L311200 | Secondary uterine inertia with antenatal problem             |
| 37 | 102246 | L265200 | Small-for-dates with antenatal problem                       |
| 38 | 73191  | L226200 | Brow presentation with antenatal problem                     |
| 39 | 69254  | L264200 | Intrauterine death with antenatal problem                    |
| 40 | 104766 | L30z200 | Obstructed labour NOS with antenatal problem                 |
| 41 | 109071 | 38B6.00 | Antenatal risk assessment                                    |
| 42 | 7845   | Z212.00 | Antenatal care                                               |
| 43 | 30378  | L244312 | Rectocele complicating antenatal care - baby not delivered   |
| 44 | 101938 | L390300 | Maternal distress with antenatal problem                     |
| 45 | 90277  | L350200 | Rupture of uterus before labour with antenatal problem       |
| 46 | 97259  | 68b6.00 | Antenatal screening declined                                 |
| 47 | 111183 | 8IHD.00 | Health visitor antenatal visit declined                      |
| 48 | 106588 | 62NJ.00 | Antenatal 22 week examination                                |
| 49 |        |         |                                                              |
| 50 |        |         |                                                              |
| 51 |        |         |                                                              |
| 52 |        |         |                                                              |
| 53 |        |         |                                                              |
| 54 |        |         |                                                              |
| 55 |        |         |                                                              |
| 56 |        |         |                                                              |
| 57 |        |         |                                                              |
| 58 |        |         |                                                              |
| 59 |        |         |                                                              |
| 60 |        |         |                                                              |

|    |        |         |                                                              |
|----|--------|---------|--------------------------------------------------------------|
| 1  |        |         |                                                              |
| 2  |        |         |                                                              |
| 3  |        |         |                                                              |
| 4  | 30801  | 62OZ.00 | Misc. antenatal data NOS                                     |
| 5  | 49665  | ZV28600 | [V]Antenatal screening for chromosomal anomalies             |
| 6  | 21543  | 622..00 | Antenatal care: gravida No.                                  |
| 7  | 109313 | 9Nil.00 | Did not attend antenatal appointment                         |
| 8  | 102755 | 8CEM.00 | Downs syndrome antenatal screening information leaflet given |
| 9  | 37985  | L2AX.00 | Abnormal finding on antenatal screening of mother            |
| 10 | 91272  | L440300 | Puerperal cerebrovascular disorder with antenatal comp       |
| 11 | 99286  | L28y200 | Other amniotic/membrane problem with antenatal problem       |
| 12 | 99479  | L267200 | Other placental conditions with antenatal problem            |
| 13 | 10056  | 62N..00 | Antenatal examinations                                       |
| 14 | 44401  | L305200 | Shoulder dystocia with antenatal problem                     |
| 15 | 35484  | 679E.00 | Antenatal education                                          |
| 16 | 103512 | L330200 | Prolapse of cord with antenatal problem                      |
| 17 | 99939  | L33y200 | Other umbilical cord complications with antenatal problem    |
| 18 | 101354 | L244311 | Cystocele complicating antenatal care - baby not delivered   |
| 19 | 39611  | 62GE.00 | Antenatal ultrasound scan at 22-40 weeks                     |
| 20 | 40597  | ZV28y00 | [V]Other specified antenatal screening                       |
| 21 | 70046  | L2A4.00 | Abnormal radiological finding on antenatal screen of mother  |
| 22 | 105047 | L2A2.00 | Abnormal cytological finding on antenatal screen of mother   |
| 23 | 96678  | L33z200 | Umbilical cord complications NOS with antenatal problem      |
| 24 | 15685  | L2A..00 | Abnormal findings on antenatal screening of mother           |
| 25 | 2029   | 62G..00 | Antenatal ultrasound scan                                    |
| 26 | 103787 | 1514100 | Estimated date of delivery by antenatal ultrasound scan      |
| 27 | 31570  | 6224    | Antenatal care: multip                                       |
| 28 | 97391  | L281200 | Premature rupture of membranes with antenatal problem        |
| 29 | 65725  | L413000 | Antenatal deep vein thrombosis unspecified                   |
| 30 | 13819  | 62F..00 | Antenatal amniocentesis                                      |
| 31 | 107186 | L266200 | Large-for-dates with antenatal problem                       |
| 32 | 16750  | 6221    | Antenatal care: primigravida                                 |
| 33 | 71851  | L229200 | Prolapsed arm with antenatal problem                         |
| 34 | 105865 | 67AJ.00 | Provision of information about antenatal screening           |
| 35 | 109043 | 9NFV.00 | Health visitor antenatal visit                               |
| 36 | 47928  | L280200 | Oligohydramnios with antenatal problem                       |
| 37 | 6298   | ZV28.00 | [V]Antenatal screening                                       |
| 38 | 45032  | 62O..00 | Misc. antenatal data                                         |
| 39 | 66496  | L222200 | Breech presentation with antenatal problem                   |
| 40 | 444    | 8HT9.00 | Referral to antenatal clinic                                 |
| 41 | 14083  | 62GZ.00 | Antenatal ultrasound scan NOS                                |
| 42 | 13419  | 62L..00 | Antenatal blood group screen                                 |
| 43 | 42120  | L2A0.00 | Abnormal haematologic find on antenatal screening of mother  |
| 44 | 13416  | 62M..00 | Antenatal sickle cell screen                                 |
| 45 | 69788  | L260200 | Fetal-maternal haemorrhage with antenatal problem            |
| 46 | 73734  | ZVu2900 | [X]Other antenatal screening                                 |
| 47 | 95107  | L312200 | Other uterine inertia with antenatal problem                 |
| 48 | 103677 | Eu32B00 | [X]Antenatal depression                                      |
| 49 |        |         |                                                              |
| 50 |        |         |                                                              |
| 51 |        |         |                                                              |
| 52 |        |         |                                                              |
| 53 |        |         |                                                              |
| 54 |        |         |                                                              |
| 55 |        |         |                                                              |
| 56 |        |         |                                                              |
| 57 |        |         |                                                              |
| 58 |        |         |                                                              |
| 59 |        |         |                                                              |
| 60 |        |         |                                                              |

|    |        |         |                                                              |
|----|--------|---------|--------------------------------------------------------------|
| 1  |        |         |                                                              |
| 2  |        |         |                                                              |
| 3  | 106923 | 62NK.00 | Antenatal 25 week examination                                |
| 4  | 108811 | L245300 | Cervical incompetence with antenatal problem                 |
| 5  | 73407  | L261200 | Rhesus isoimmunisation with antenatal problem                |
| 6  | 101980 | 65QG.00 | Antenatal screening shows non sig haemoglobinopathy carrier  |
| 7  | 44828  | L263200 | Fetal distress with antenatal problem                        |
| 8  | 45091  | 62Y..00 | Routine antenatal care                                       |
| 9  | 71862  | L323200 | Delayed delivery second twin with antenatal problem          |
| 10 | 71794  | L307200 | Other failed trial of labour with antenatal problem          |
| 11 | 51432  | 62FZ.00 | Antenatal amniocentesis NOS                                  |
| 12 | 97523  | 68b..00 | Antenatal screening status                                   |
| 13 | 28290  | L2A3.00 | Abnormal ultrasonic finding on antenatal screening of mother |
| 14 | 36226  | L2A1.00 | Abnormal biochemical finding on antenatal screen of mother   |
| 15 | 100502 | L413200 | Antenatal deep vein thrombosis with antenatal complication   |
| 16 | 61203  | L413z00 | Antenatal deep vein thrombosis NOS                           |
| 17 | 100578 | L255200 | Fetus with drug damage with antenatal problem                |
| 18 | 69072  | L262200 | Other blood-group isoimmunisation with antenatal problem     |
| 19 | 49617  | 622Z.00 | Antenatal care: gravida NOS                                  |
| 20 | 26873  | L413.11 | DVT - deep venous thrombosis, antenatal                      |
| 21 | 33009  | 6254    | A/N care: H/O child abuse                                    |
| 22 | 29610  | 62NB.00 | A/N 36 week examination                                      |
| 23 | 61162  | L250200 | Fetus with central nervous system malformation + a/n problem |
| 24 | 52044  | 6252    | A/N care: poor A/N attender                                  |
| 25 | 35513  | 6284    | A/N care: primip. > 30 years                                 |
| 26 | 26695  | 625Z.00 | A/N care: social risk NOS                                    |
| 27 | 55605  | 62NH.00 | A/N 42 week examination                                      |
| 28 | 30797  | 6233    | A/N care: grand multip                                       |
| 29 | 23013  | 6231    | A/N care: uncertain dates                                    |
| 30 | 36516  | 62F4.00 | A/N amniocentesis wanted                                     |
| 31 | 37046  | 628Z.00 | A/N risk NOS                                                 |
| 32 | 107506 | 62H2.00 | A/N Rh screen offered                                        |
| 33 | 25331  | 62O6.11 | Vaginal 'show' - A/N                                         |
| 34 | 64537  | 62GA.00 | A/N U/S scan for slow growth                                 |
| 35 | 13821  | 62F6.00 | A/N amniocentesis - normal                                   |
| 36 | 19772  | 62F3.00 | A/N amniocentesis - not wanted                               |
| 37 | 70840  | L240311 | Bicornuate uterus complicating a/n care, baby not delivered  |
| 38 | 33287  | 62F1.00 | A/N amniocentesis -not offered                               |
| 39 | 13171  | 62N8.00 | A/N 32 week examination                                      |
| 40 | 52049  | 62G3.00 | A/N U/S scan not wanted                                      |
| 41 | 33008  | 6285    | A/N care: multip. > 35 years                                 |
| 42 | 26696  | 6253    | A/N care: late booker                                        |
| 43 | 24219  | 62A..00 | A/N care provider                                            |
| 44 | 13308  | 625..00 | A/N care: social risk                                        |
| 45 | 26692  | 6236    | A/N care: poor obstetr history                               |
| 46 | 37222  | 62G1.00 | A/N U/S scan not offered                                     |
| 47 | 25391  | 62I..12 | Alpha-feto protein test - A/N                                |
| 48 |        |         |                                                              |
| 49 |        |         |                                                              |
| 50 |        |         |                                                              |
| 51 |        |         |                                                              |
| 52 |        |         |                                                              |
| 53 |        |         |                                                              |
| 54 |        |         |                                                              |
| 55 |        |         |                                                              |
| 56 |        |         |                                                              |
| 57 |        |         |                                                              |
| 58 |        |         |                                                              |
| 59 |        |         |                                                              |
| 60 |        |         |                                                              |



|    |        |         |                                                              |
|----|--------|---------|--------------------------------------------------------------|
| 1  |        |         |                                                              |
| 2  |        |         |                                                              |
| 3  | 35512  | 6281    | A/N care: under 5ft tall                                     |
| 4  | 31251  | 627..00 | A/N care: gynae. risk                                        |
| 5  | 26551  | 62NE.00 | A/N 39 week examination                                      |
| 6  | 68089  | 62HZ.00 | A/N Rh antibody screen NOS                                   |
| 7  |        |         |                                                              |
| 8  | 26691  | 6235    | A/N care: H/O perinatal death                                |
| 9  |        |         |                                                              |
| 10 | 35826  | 62G6.00 | A/N U/S scan normal += dates                                 |
| 11 | 30885  | 62G4.00 | A/N U/S scan wanted                                          |
| 12 | 70289  | 62F9.00 | A/N amnio. for ? neural tube                                 |
| 13 |        |         |                                                              |
| 14 | 26693  | 626..00 | A/N care: medical risk                                       |
| 15 | 73099  | L246311 | Polyp of cervix complicating a/n care- baby not delivered    |
| 16 | 20401  | L241311 | Uterine fibroid complicating a/n care, baby not delivered    |
| 17 |        |         |                                                              |
| 18 | 65450  | 62F2.00 | A/N amniocentesis - offered                                  |
| 19 | 24236  | 62AZ.00 | A/N care provider NOS                                        |
| 20 | 26553  | 62ND.00 | A/N 38 week examination                                      |
| 21 |        |         |                                                              |
| 22 | 102160 | L283200 | Prolonged artificial rupture of membranes with a/n problem   |
| 23 | 64141  | 62K2.00 | A/N syphilis screen-blood sent                               |
| 24 | 26550  | 62A2.00 | A/N care from consultant                                     |
| 25 | 89025  | L237200 | Other fetal abnormality causing disproportion with a/n prob  |
| 26 |        |         |                                                              |
| 27 | 102099 | 62MZ.00 | A/N sickle cell screen NOS                                   |
| 28 | 47415  | 62G5.00 | A/N U/S scan awaited                                         |
| 29 | 13415  | 62A4.00 | A/N care midwifery led                                       |
| 30 | 54734  | L28z200 | Amniotic cavity and membrane problem NOS with a/n problem    |
| 31 |        |         |                                                              |
| 32 | 14086  | 62G8.00 | A/N U/S scan abnormal                                        |
| 33 | 37221  | 62G7.00 | A/N U/S scan normal +? dates                                 |
| 34 | 66608  | L241300 | Tumour of uterine body complicating a/n care, baby not deliv |
| 35 |        |         |                                                              |
| 36 | 71797  | L248300 | Vulval abn complicating a/n care - baby not yet delivered    |
| 37 | 37029  | 62NG.00 | A/N 41 week examination                                      |
| 38 | 29727  | 62NA.00 | A/N 35 week examination                                      |
| 39 |        |         |                                                              |
| 40 | 108885 | 62L1.00 | A/N blood gp screen not done                                 |
| 41 | 39172  | 62L2.00 | A/N blood group screen done                                  |
| 42 | 38165  | 6237    | A/N care: H/O trophoblast.dis.                               |
| 43 | 35511  | 6234    | A/N care: H/O stillbirth                                     |
| 44 | 26875  | 6232    | A/N care: recurrent aborter                                  |
| 45 |        |         |                                                              |
| 46 | 9546   | 623..00 | A/N care: obstetric risk                                     |
| 47 | 73120  | L247300 | Vaginal abnormality complicating a/n care-baby not delivered |
| 48 | 24214  | 62A1.00 | A/N care from G.P.                                           |
| 49 |        |         |                                                              |
| 50 | 13169  | 62N5.00 | A/N 24 week examination                                      |
| 51 | 29627  | 62N7.00 | A/N 30 week examination                                      |
| 52 | 3517   | 62N1.00 | A/N booking examination                                      |
| 53 |        |         |                                                              |
| 54 | 62147  | 62F8.00 | A/N amnio. for ? chrom.abnorm.                               |
| 55 | 37047  | 6242    | A/N care: H/O infertility                                    |
| 56 | 27057  | 62G9.00 | A/N U/S scan for ? abnormality                               |
| 57 | 70616  | 62M2.00 | A/N sickle cell screen done                                  |
| 58 | 29059  | 62A3.00 | A/N - shared care                                            |
| 59 |        |         |                                                              |
| 60 | 108867 | 62M1.00 | A/N sickle screen not done                                   |

|    |        |         |                                                              |
|----|--------|---------|--------------------------------------------------------------|
| 1  |        |         |                                                              |
| 2  |        |         |                                                              |
| 3  | 12260  | 62H..00 | A/N Rh antibody screen                                       |
| 4  | 41955  | 62F5.00 | A/N amniocentesis - awaited                                  |
| 5  | 13166  | 62N3.00 | A/N 16 week examination                                      |
| 6  | 35510  | 6241    | A/N care: elderly primip.                                    |
| 7  |        |         |                                                              |
| 8  | 26552  | 62NC.00 | A/N 37 week examination                                      |
| 9  | 29280  | 62NF.00 | A/N 40 week examination                                      |
| 10 |        |         |                                                              |
| 11 | 3786   | 628..00 | A/N care: risk NOS                                           |
| 12 | 39728  | 62O..11 | Fetal maturity - A/N                                         |
| 13 | 13822  | 62F7.00 | A/N amniocentesis - abnormal                                 |
| 14 | 71912  | 62H1.00 | A/N Rh screen not offered                                    |
| 15 | 26694  | 6251    | A/N care: poor home conditions                               |
| 16 |        |         |                                                              |
| 17 | 70186  | 62LZ.00 | A/N blood group screen NOS                                   |
| 18 | 26690  | 623Z.00 | A/N care: obstetric risk NOS                                 |
| 19 | 98957  | L240300 | Cong abnorm uterus complicating a/n care, baby not delivered |
| 20 | 13170  | 62N9.00 | A/N 34 week examination                                      |
| 21 | 109166 | 62K1.00 | A/N syphilis screen not done                                 |
| 22 |        |         |                                                              |
| 23 | 13167  | 62N2.00 | A/N 12 weeks examination                                     |
| 24 | 37220  | 62G2.00 | A/N U/S scan offered                                         |
| 25 |        |         |                                                              |
| 26 | 29364  | 62N4.00 | A/N 20 week examination                                      |
| 27 | 26554  | 62N6.00 | A/N 28 week examination                                      |
| 28 |        |         |                                                              |
| 29 | 31250  | 6283    | A/N care: primip. < 17 years                                 |
| 30 | 30209  | ZV27000 | [V]Single live birth                                         |
| 31 | 20573  | Q48D000 | [X]Fresh stillbirth                                          |
| 32 |        |         |                                                              |
| 33 | 11966  | ZV27.11 | [V]Live birth                                                |
| 34 | 8906   | ZV27.12 | [V]Stillbirth                                                |
| 35 |        |         |                                                              |
| 36 | 41253  | 7F...11 | Childbirth operations                                        |
| 37 | 10719  | 6331    | Single live birth                                            |
| 38 | 28726  | 7F19100 | Water birth delivery                                         |
| 39 | 58978  | Q20y.00 | Other specified birth trauma                                 |
| 40 | 37884  | Z254D00 | Face to pubes birth                                          |
| 41 | 72025  | ZV3zz00 | [V]Unspecified birth, NOS                                    |
| 42 | 8776   | Q48D.00 | [X] Stillbirth                                               |
| 43 |        |         |                                                              |
| 44 | 5253   | 633a.00 | Birth of child                                               |
| 45 | 31203  | 6332    | Single stillbirth                                            |
| 46 | 13287  | 633..11 | Livebirth                                                    |
| 47 | 17354  | 633..13 | Triplet birth                                                |
| 48 | 1825   | 633..14 | Twin birth                                                   |
| 49 |        |         |                                                              |
| 50 | 1214   | 6311    | Home birth                                                   |
| 51 | 2353   | 63E2.00 | Normal birth                                                 |
| 52 | 974    | Q4z..15 | Stillbirth NEC                                               |
| 53 | 110211 | 633C.00 | Intrapartum stillbirth                                       |
| 54 | 70813  | ZV27500 | [V]Other multiple birth, all live born                       |
| 55 | 37878  | Z254E11 | Multiple birth delivery                                      |
| 56 | 42324  | L34z.00 | Vulval/perineal trauma during delivery NOS                   |
| 57 |        |         |                                                              |
| 58 | 55124  | L39yz00 | Other complications of labour and delivery NOS               |
| 59 |        |         |                                                              |
| 60 |        |         |                                                              |

|    |        |         |                                                              |
|----|--------|---------|--------------------------------------------------------------|
| 1  |        |         |                                                              |
| 2  |        |         |                                                              |
| 3  |        |         |                                                              |
| 4  | 27351  | Q036.00 | Fetus or neonate affected by precipitate delivery            |
| 5  | 43918  | L340400 | Fourchette tear during delivery                              |
| 6  | 33915  | L213.00 | Multiple delivery                                            |
| 7  | 5213   | 7F16400 | Low forceps cephalic delivery                                |
| 8  |        |         |                                                              |
| 9  | 25223  | L396.00 | Vacuum extractor delivery                                    |
| 10 | 57957  | 7F1Ay00 | Other specified other method of delivery                     |
| 11 | 7670   | L398z00 | Caesarean delivery NOS                                       |
| 12 | 24243  | L263400 | Labour and delivery complic by meconium in amniotic fluid    |
| 13 | 15828  | 14Y4.00 | Born by breech delivery                                      |
| 14 | 69780  | Lyu5100 | [X]Other and unspecified forceps delivery                    |
| 15 | 62862  | L342200 | Third degree perineal tear during delivery with p/n problem  |
| 16 | 68752  | Z253300 | Normal rate of delivery                                      |
| 17 | 33773  | 7F19y00 | Other specified normal delivery                              |
| 18 |        |         |                                                              |
| 19 | 30775  | 62B8.00 | Midwife unit delivery booking                                |
| 20 | 6452   | L395.00 | Forceps delivery                                             |
| 21 | 239    | L20..11 | Spontaneous vaginal delivery                                 |
| 22 |        |         |                                                              |
| 23 | 95858  | L34y100 | Other vulval/perineal trauma during delivery- delivered      |
| 24 | 29070  | 7F15000 | Spontaneous breech delivery                                  |
| 25 |        |         |                                                              |
| 26 | 19605  | L341z00 | Second degree perineal tear during delivery NOS              |
| 27 | 57945  | 7F17200 | Vacuum delivery before full dilation of cervix               |
| 28 | 72022  | L343000 | Fourth degree perineal tear during delivery, unspecified     |
| 29 | 19607  | L344000 | Unspecified perineal laceration during delivery, unspecified |
| 30 |        |         |                                                              |
| 31 | 3365   | L142.11 | Premature delivery                                           |
| 32 |        |         |                                                              |
| 33 | 27914  | 62V..00 | Delivery place planned                                       |
| 34 | 90885  | Lyu4900 | [X]Labour+delivery complicated by other cord entanglement    |
| 35 |        |         |                                                              |
| 36 | 56310  | Z25..00 | Delivery observations                                        |
| 37 | 12052  | Z257.00 | Delivery normal                                              |
| 38 | 11532  | 7F14.00 | Breech extraction delivery                                   |
| 39 | 13164  | 62BZ.00 | Delivery booking - place NOS                                 |
| 40 | 61212  | L34y.00 | Other vulval and perineal trauma during delivery             |
| 41 | 61077  | 7F16200 | Mid forceps cephalic delivery with rotation                  |
| 42 | 5866   | 7F1..00 | Induction and delivery operations                            |
| 43 |        |         |                                                              |
| 44 | 65940  | 7F16500 | Trial of forceps delivery                                    |
| 45 | 19608  | L340z00 | First degree perineal tear during delivery NOS               |
| 46 | 52875  | L398000 | Caesarean delivery unspecified                               |
| 47 | 83535  | Lyu5000 | [X]Other single spontaneous delivery                         |
| 48 | 47625  | Z22C200 | Estimated date of delivery from last normal period           |
| 49 |        |         |                                                              |
| 50 | 17744  | 7F13100 | Lower uterine segment caesarean delivery NEC                 |
| 51 | 15073  | 7F13y00 | Other specified other caesarean delivery                     |
| 52 |        |         |                                                              |
| 53 | 9800   | L398300 | Delivery by elective caesarean section                       |
| 54 | 37699  | L396z00 | Vacuum extractor delivery NOS                                |
| 55 | 72021  | L343100 | Fourth degree perineal tear during delivery - delivered      |
| 56 |        |         |                                                              |
| 57 | 107136 | Q031.11 | Fetus affected by malpresentation during delivery            |
| 58 | 17684  | L395.11 | Keilland's forceps delivery                                  |
| 59 |        |         |                                                              |
| 60 | 20425  | L395.12 | Neville - Barnes forceps delivery                            |

|    |        |         |                                                             |
|----|--------|---------|-------------------------------------------------------------|
| 1  |        |         |                                                             |
| 2  |        |         |                                                             |
| 3  |        |         |                                                             |
| 4  | 4780   | L20..00 | Normal delivery in a completely normal case                 |
| 5  | 5868   | Ly0..00 | Spontaneous vertex delivery                                 |
| 6  | 106113 | Lyu5800 | [X]Multiple delivery, unspecified                           |
| 7  | 62406  | L323000 | Delayed delivery second twin unspecified                    |
| 8  | 61540  | Z212100 | Delivery place planned                                      |
| 9  | 47157  | L34zz00 | Vulval/perineal trauma during delivery NOS                  |
| 10 | 58176  | 62C2.00 | Full stay delivery booking                                  |
| 11 | 32283  | Z212200 | Home delivery planned                                       |
| 12 | 106808 | L34z200 | Vulval/perineal trauma during delivery NOS with p/n problem |
| 13 | 740    | 7F12.00 | Elective caesarean delivery                                 |
| 14 | 111579 | Z263300 | Condition of membranes at delivery                          |
| 15 | 34102  | Z262700 | Incomplete placenta at delivery                             |
| 16 | 21554  | 7F16900 | Kielland forceps cephalic delivery with rotation            |
| 17 | 31254  | L340100 | First degree perineal tear during delivery - delivered      |
| 18 | 23394  | 7F16300 | Mid forceps cephalic delivery NEC                           |
| 19 | 54591  | 7F14z00 | Breech extraction delivery NOS                              |
| 20 | 3085   | 7F12z00 | Elective caesarean delivery NOS                             |
| 21 | 22491  | Ly1..00 | Spontaneous breech delivery                                 |
| 22 | 19609  | L340600 | Vaginal tear during delivery                                |
| 23 | 39168  | L342100 | Third degree perineal tear during delivery - delivered      |
| 24 | 44235  | L296.00 | Vaginal delivery following previous caesarean section       |
| 25 | 40706  | L344z00 | Unspecified perineal laceration during delivery NOS         |
| 26 | 27993  | 62V0.00 | Home delivery planned                                       |
| 27 | 58721  | L20z.00 | Normal delivery in completely normal case NOS               |
| 28 | 33477  | L398100 | Caesarean delivery - delivered                              |
| 29 | 27963  | L323.00 | Delayed delivery of second twin, triplet etc                |
| 30 | 37509  | 7F1A300 | Drainage of hydrocephalus of fetus to facilitate delivery   |
| 31 | 30806  | L34yz00 | Other vulval/perineal trauma during delivery NOS            |
| 32 | 30373  | Z22C100 | Estimated date of delivery from last period                 |
| 33 | 42572  | L323100 | Delayed delivery second twin - delivered                    |
| 34 | 15514  | 7F13000 | Upper uterine segment caesarean delivery NEC                |
| 35 | 47546  | 7F12y00 | Other specified elective caesarean delivery                 |
| 36 | 86399  | 7F17y00 | Other specified vacuum delivery                             |
| 37 | 13352  | L34..00 | Trauma to perineum and vulva during delivery                |
| 38 | 49446  | L396100 | Vacuum extractor delivery - delivered                       |
| 39 | 15256  | L344.00 | Unspecified perineal laceration during delivery             |
| 40 | 37054  | L341100 | Second degree perineal tear during delivery - delivered     |
| 41 | 3108   | 7F1B000 | Episiotomy to facilitate delivery                           |
| 42 | 47863  | Lyu5200 | [X]Other single delivery by caesarean section               |
| 43 | 9160   | Z257100 | Spontaneous vertex delivery                                 |
| 44 | 58844  | L396000 | Vacuum extractor delivery unspecified                       |
| 45 | 57488  | L34z100 | Vulval/perineal trauma during delivery NOS - delivered      |
| 46 | 27731  | L345.12 | Vulval and perineal haematoma during delivery               |
| 47 | 104872 | L143100 | Premature labour with premature delivery                    |
| 48 | 42275  | L395300 | Mid-cavity forceps delivery                                 |
| 49 |        |         |                                                             |
| 50 |        |         |                                                             |
| 51 |        |         |                                                             |
| 52 |        |         |                                                             |
| 53 |        |         |                                                             |
| 54 |        |         |                                                             |
| 55 |        |         |                                                             |
| 56 |        |         |                                                             |
| 57 |        |         |                                                             |
| 58 |        |         |                                                             |
| 59 |        |         |                                                             |
| 60 |        |         |                                                             |

|    |       |         |                                                              |
|----|-------|---------|--------------------------------------------------------------|
| 1  |       |         |                                                              |
| 2  |       |         |                                                              |
| 3  |       |         |                                                              |
| 4  | 40876 | L342z00 | Third degree perineal tear during delivery NOS               |
| 5  | 93273 | L39z100 | Complications of labour and delivery NOS - delivered         |
| 6  | 42755 | L387.00 | Spinal/epidural ansth-induced headache dur labour/delivery   |
| 7  | 57789 | L395400 | Delivery by combination of forceps and vacuum extractor      |
| 8  |       |         |                                                              |
| 9  | 19603 | L340000 | First degree perineal tear during delivery, unspecified      |
| 10 | 4786  | L213200 | Multiple delivery, all by caesarean section                  |
| 11 | 20002 | 7F16000 | High forceps cephalic delivery with rotation                 |
| 12 | 66501 | L39zz00 | Complications of labour and delivery NOS                     |
| 13 | 34333 | Z262711 | Incomplete delivery of placenta                              |
| 14 | 19602 | L341000 | Second degree perineal tear during delivery, unspecified     |
| 15 | 39866 | 7F1A200 | Cleidotomy of fetus to facilitate delivery                   |
| 16 |       |         |                                                              |
| 17 | 30805 | L34y000 | Other vulval/perineal trauma during delivery, unspecified    |
| 18 | 11530 | Z254900 | Vaginal delivery                                             |
| 19 |       |         |                                                              |
| 20 | 67489 | L34z000 | Vulval/perineal trauma during delivery NOS unspec            |
| 21 | 4638  | 7F13.00 | Other caesarean delivery                                     |
| 22 | 40744 | Z254A00 | Abnormal delivery                                            |
| 23 |       |         |                                                              |
| 24 | 25157 | L142100 | Early onset of delivery - delivered                          |
| 25 | 17704 | L395.13 | Simpson's forceps delivery                                   |
| 26 |       |         |                                                              |
| 27 | 39573 | Z265900 | Umbilical cord not around baby's neck at delivery            |
| 28 | 5033  | 7F16100 | High forceps cephalic delivery NEC                           |
| 29 | 26549 | 62B1.00 | Delivery: no place booked                                    |
| 30 | 50293 | 7F1z.00 | Induction and delivery operations NOS                        |
| 31 |       |         |                                                              |
| 32 | 67862 | L39..00 | Other complications of labour and delivery NEC               |
| 33 | 63277 | L393.00 | Acute renal failure following labour and delivery            |
| 34 | 32380 | L34..12 | Vulval delivery trauma                                       |
| 35 |       |         |                                                              |
| 36 | 23866 | 7F1B100 | Symphysiotomy to facilitate delivery                         |
| 37 | 618   | L398400 | Delivery by emergency caesarean section                      |
| 38 | 66315 | Lyu5500 | [X]Other specified assisted single delivery                  |
| 39 | 23791 | L38A.00 | Failed or difficult intubation during labour and delivery    |
| 40 |       |         |                                                              |
| 41 | 99608 | 7F1Bz00 | Other operation to facilitate delivery NOS                   |
| 42 | 98749 | 7F1B400 | Incision of cervix to facilitate delivery                    |
| 43 | 30274 | L395200 | Low forceps delivery                                         |
| 44 |       |         |                                                              |
| 45 | 35190 | 7F13z00 | Other caesarean delivery NOS                                 |
| 46 | 40710 | L395z00 | Forceps delivery NOS                                         |
| 47 | 26712 | L340300 | Labial tear during delivery                                  |
| 48 | 62789 | Q031.00 | Fetus/neonate affected by malposition/disproportion-delivery |
| 49 | 2624  | Q033.00 | Fetus or neonate affected by vacuum extraction delivery      |
| 50 |       |         |                                                              |
| 51 | 19599 | L340.00 | First degree perineal tear during delivery                   |
| 52 | 11650 | L342.00 | Third degree perineal tear during delivery                   |
| 53 |       |         |                                                              |
| 54 | 51736 | 7F17100 | Low vacuum delivery                                          |
| 55 | 36703 | L345.00 | Vulval and perineal haematoma during delivery                |
| 56 | 2458  | 7F17.00 | Vacuum delivery                                              |
| 57 |       |         |                                                              |
| 58 | 22975 | 62B3.00 | G.P. unit delivery booking                                   |
| 59 | 32988 | 62B5.00 | Private home delivery booking                                |
| 60 | 49485 | L263600 | Labour+delivery complicatd by biochem evidence/fetal stress  |

|    |        |         |                                                             |
|----|--------|---------|-------------------------------------------------------------|
| 1  |        |         |                                                             |
| 2  |        |         |                                                             |
| 3  |        |         |                                                             |
| 4  | 5522   | L3z..00 | Complications of labour and delivery NOS                    |
| 5  | 103319 | Lyu4.00 | [X]Complications of labour and delivery                     |
| 6  | 14789  | Q030.11 | Fetus affected by breech delivery                           |
| 7  | 34411  | Z254300 | Delivered by mid-cavity forceps delivery                    |
| 8  | 48230  | Z254800 | Deliveries by spontaneous breech delivery                   |
| 9  | 36137  | L142z00 | Early onset of delivery NOS                                 |
| 10 | 59941  | L142000 | Early onset of delivery unspecified                         |
| 11 | 20738  | 7F19000 | Manually assisted vaginal delivery                          |
| 12 | 34628  | 7F16600 | Failed forceps delivery                                     |
| 13 | 33480  | 7F16y00 | Other specified forceps cephalic delivery                   |
| 14 | 37245  | L345000 | Vulval and perineal haematoma during delivery, unspecified  |
| 15 | 43959  | 633Z.00 | Outcome of delivery NOS                                     |
| 16 | 70615  | L345z00 | Vulval and perineal haematoma during delivery NOS           |
| 17 | 60953  | Z253211 | Precipitate delivery                                        |
| 18 | 53572  | L3y..00 | Other specified complications of labour or delivery         |
| 19 | 9668   | 7F12100 | Elective lower uterine segment caesarean delivery           |
| 20 | 9791   | Z257.15 | ND - Normal delivery                                        |
| 21 | 9625   | L263300 | Labour and delivery complicated by fetal heart rate anomaly |
| 22 | 28861  | L398500 | Delivery by caesarean hysterectomy                          |
| 23 | 49733  | L388.00 | Cardiac comps of anaesthesia during labour and delivery     |
| 24 | 15480  | 14Y3.00 | Born by normal vaginal delivery                             |
| 25 | 98059  | Lyu5400 | [X]Other manipulation-assisted delivery                     |
| 26 | 69971  | Z253100 | Slow rate of delivery                                       |
| 27 | 61226  | ZV27y00 | [V]Other specified outcome of delivery                      |
| 28 | 105276 | 7F14000 | Breech extraction delivery with version                     |
| 29 | 103890 | 1514000 | Estimated date of delivery from last period                 |
| 30 | 101229 | Z255A00 | Observation of delivery push in labour                      |
| 31 | 50675  | L395100 | Forceps delivery - delivered                                |
| 32 | 44472  | L39y.00 | Other complications of labour and delivery                  |
| 33 | 48742  | Z254C00 | Face delivery                                               |
| 34 | 33884  | L213000 | Multiple delivery, all spontaneous                          |
| 35 | 14892  | 7F17z00 | Vacuum delivery NOS                                         |
| 36 | 64464  | 7F15z00 | Other breech delivery NOS                                   |
| 37 | 13163  | 62B..00 | Delivery booking place                                      |
| 38 | 105419 | 7F17000 | High vacuum delivery                                        |
| 39 | 8879   | 1514.12 | Estimated date of delivery                                  |
| 40 | 720    | L398.00 | Caesarean delivery                                          |
| 41 | 29885  | L3...00 | Complications occurring during labour and delivery          |
| 42 | 14727  | 14Y1.00 | Born by forceps delivery                                    |
| 43 | 15675  | 14Y5.00 | Born by ventouse delivery                                   |
| 44 | 167    | 7F19.00 | Normal delivery                                             |
| 45 | 32991  | 62C1.00 | Short stay delivery booking                                 |
| 46 | 688    | 7F17.11 | Ventouse delivery                                           |
| 47 | 463    | L222.12 | Breech delivery                                             |
| 48 | 6141   | L396.11 | Ventouse delivery                                           |
| 49 |        |         |                                                             |
| 50 |        |         |                                                             |
| 51 |        |         |                                                             |
| 52 |        |         |                                                             |
| 53 |        |         |                                                             |
| 54 |        |         |                                                             |
| 55 |        |         |                                                             |
| 56 |        |         |                                                             |
| 57 |        |         |                                                             |
| 58 |        |         |                                                             |
| 59 |        |         |                                                             |
| 60 |        |         |                                                             |

|    |        |         |                                                             |
|----|--------|---------|-------------------------------------------------------------|
| 1  |        |         |                                                             |
| 2  |        |         |                                                             |
| 3  |        |         |                                                             |
| 4  |        |         |                                                             |
| 5  |        |         |                                                             |
| 6  |        |         |                                                             |
| 7  |        |         |                                                             |
| 8  |        |         |                                                             |
| 9  |        |         |                                                             |
| 10 |        |         |                                                             |
| 11 |        |         |                                                             |
| 12 |        |         |                                                             |
| 13 |        |         |                                                             |
| 14 |        |         |                                                             |
| 15 |        |         |                                                             |
| 16 |        |         |                                                             |
| 17 |        |         |                                                             |
| 18 |        |         |                                                             |
| 19 |        |         |                                                             |
| 20 |        |         |                                                             |
| 21 |        |         |                                                             |
| 22 |        |         |                                                             |
| 23 |        |         |                                                             |
| 24 |        |         |                                                             |
| 25 |        |         |                                                             |
| 26 |        |         |                                                             |
| 27 |        |         |                                                             |
| 28 |        |         |                                                             |
| 29 |        |         |                                                             |
| 30 |        |         |                                                             |
| 31 |        |         |                                                             |
| 32 |        |         |                                                             |
| 33 |        |         |                                                             |
| 34 |        |         |                                                             |
| 35 |        |         |                                                             |
| 36 |        |         |                                                             |
| 37 |        |         |                                                             |
| 38 |        |         |                                                             |
| 39 |        |         |                                                             |
| 40 |        |         |                                                             |
| 41 |        |         |                                                             |
| 42 |        |         |                                                             |
| 43 |        |         |                                                             |
| 44 |        |         |                                                             |
| 45 |        |         |                                                             |
| 46 |        |         |                                                             |
| 47 |        |         |                                                             |
| 48 |        |         |                                                             |
| 49 |        |         |                                                             |
| 50 |        |         |                                                             |
| 51 |        |         |                                                             |
| 52 |        |         |                                                             |
| 53 |        |         |                                                             |
| 54 |        |         |                                                             |
| 55 |        |         |                                                             |
| 56 |        |         |                                                             |
| 57 |        |         |                                                             |
| 58 |        |         |                                                             |
| 59 |        |         |                                                             |
| 60 |        |         |                                                             |
|    | 28903  | Z254200 | Delivered by low forceps delivery                           |
|    | 100597 | L39y100 | Other complications of labour and delivery - delivered      |
|    | 12014  | ZV27.00 | [V]Outcome of delivery                                      |
|    | 61259  | 7F12000 | Elective upper uterine segment caesarean delivery           |
|    | 105032 | L143000 | Premature labour without delivery                           |
|    | 42885  | Z254.00 | Observation of pattern of delivery                          |
|    | 107557 | 63D7.00 | Complete placenta at delivery                               |
|    | 37254  | Q030.00 | Fetus or neonate affected by breech delivery and extraction |
|    | 3078   | Q032.00 | Fetus or neonate affected by forceps delivery               |
|    | 19600  | L341.00 | Second degree perineal tear during delivery                 |
|    | 39576  | L343.00 | Fourth degree perineal tear during delivery                 |
|    | 31280  | L340500 | Vulval tear during delivery                                 |
|    | 25545  | Z212300 | Delivery place booked                                       |
|    | 70242  | 7F16700 | Barton forceps cephalic delivery with rotation              |
|    | 71057  | L345100 | Vulval and perineal haematoma during delivery - delivered   |
|    | 1279   | 7F16.00 | Forceps cephalic delivery                                   |
|    | 22976  | 62B2.00 | Home delivery booked                                        |
|    | 41414  | 62B6.00 | Delivery booking place changed                              |
|    | 104873 | L143.00 | Premature labour and delivery                               |
|    | 50847  | L398600 | Caesarean delivery following previous Caesarean delivery    |
|    | 18287  | 7F22500 | Normal delivery of placenta                                 |
|    | 19604  | L342000 | Third degree perineal tear during delivery, unspecified     |
|    | 2943   | L222.11 | Assisted breech delivery                                    |
|    | 96089  | Z253200 | Rapid rate of delivery                                      |
|    | 8967   | 7F19z00 | Normal delivery NOS                                         |
|    | 51065  | 62CZ.00 | Delivery booking - stay NOS                                 |
|    | 33378  | 7F15.00 | Other breech delivery                                       |
|    | 53937  | L395000 | Forceps delivery unspecified                                |
|    | 90497  | L39z400 | Complications of labour and delivery NOS with p/n problem   |
|    | 23994  | 7F15100 | Assisted breech delivery                                    |
|    | 60256  | Z254B00 | Brow delivery                                               |
|    | 60538  | L213100 | Multiple delivery, all by forceps and vacuum extractor      |
|    | 15926  | 7F15y00 | Other specified other breech delivery                       |
|    | 95780  | Z262600 | Complete placenta at delivery                               |
|    | 65702  | L38..00 | Complications of anaesthesia during labour and delivery     |
|    | 14686  | 7F16z00 | Forceps cephalic delivery NOS                               |
|    | 67052  | L344100 | Unspecified perineal laceration during delivery - delivered |
|    | 15167  | L142.00 | Early onset of delivery                                     |
|    | 11194  | Z257.12 | Spontaneous vaginal delivery                                |
|    | 25681  | Z257.13 | SVD - Spontaneous vaginal delivery                          |
|    | 9383   | Z257.11 | Normal delivery                                             |
|    | 17492  | Z257.14 | FTND - Full term normal delivery                            |
|    | 31780  | L222.13 | Spontaneous breech delivery                                 |
|    | 22498  | Z253.12 | Rate of delivery                                            |
|    | 52151  | Lyu4800 | [X]Labour+delivery complicat/oth evidence of fetal distress |

|    |        |         |                                                              |
|----|--------|---------|--------------------------------------------------------------|
| 1  |        |         |                                                              |
| 2  |        |         |                                                              |
| 3  | 39319  | 8HE7.00 | Discharged from hospital within 6 hours of delivery          |
| 4  | 73048  | 7F14y00 | Other specified breech extraction delivery                   |
| 5  | 109452 | 7F1By00 | Other specified other operation to facilitate delivery       |
| 6  | 69920  | L39z.00 | Complications of labour and delivery NOS                     |
| 7  | 57652  | L343z00 | Fourth degree perineal tear during delivery NOS              |
| 8  | 53100  | 7F20z00 | Instrumental removal products of concep delivered uterus NOS |
| 9  | 41494  | 7F21z00 | Manual removal products of conception delivered uterus NOS   |
| 10 | 27800  | L124300 | Mild or unspecified pre-eclampsia - not delivered            |
| 11 | 41588  | L112200 | Placental abruption - not delivered                          |
| 12 | 3364   | L126300 | Eclampsia - not delivered                                    |
| 13 | 65759  | L244300 | Other uterine/pelvic floor abnormal - baby not yet delivered |
| 14 | 62880  | L110200 | Placenta praevia without haemorrhage - not delivered         |
| 15 | 69002  | L11y200 | Other antepartum haemorrhage - not delivered                 |
| 16 | 67447  | L125300 | Severe pre-eclampsia - not delivered                         |
| 17 | 64752  | L111200 | Placenta praevia with haemorrhage - not delivered            |
| 18 | 53160  | L127300 | Pre-eclampsia or eclampsia with hypertension - not delivered |
| 19 | 31617  | L130200 | Mild hyperemesis-not delivered                               |
| 20 | 57852  | L100200 | Threatened abortion - not delivered                          |
| 21 | 64298  | L141100 | Other threatened labour - not delivered                      |
| 22 | 54082  | L169300 | Herpes gestationis - not delivered                           |
| 23 | 48830  | L140100 | Threatened premature labour - not delivered                  |
| 24 | 54576  | Z252.00 | Mother not delivered                                         |
| 25 | 2549   | L222.00 | Breech presentation                                          |
| 26 | 13288  | 2722    | O/E - breech presentation                                    |
| 27 | 46298  | L222z00 | Breech presentation NOS                                      |
| 28 | 55359  | Q017100 | Fetus/neonate affected by breech presentation before labour  |
| 29 | 56867  | L300300 | Obstructed labour due to breech presentation                 |
| 30 | 66786  | L397z00 | Breech extraction NOS                                        |
| 31 | 48516  | Z254400 | Deliveries by breech extraction                              |
| 32 | 4955   | L397.00 | Breech extraction                                            |
| 33 | 66106  | L397000 | Breech extraction unspecified                                |
| 34 | 15610  | 7F06300 | External version of breech                                   |
| 35 | 1534   | 7F14100 | Forceps to aftercoming head (breech)                         |
| 36 | 66307  | L222000 | Breech presentation unspecified                              |
| 37 | 16097  | Q214z00 | Liveborn with unspecified fetal distress NOS                 |
| 38 | 33258  | L512.00 | Maternal care for diminished fetal movements                 |
| 39 | 67883  | L514.00 | Maternal care for poor fetal growth                          |
| 40 | 50733  | L263.12 | Fetal bradycardia                                            |
| 41 | 23009  | Q213.11 | Fetal distress in labour - liveborn                          |
| 42 | 48463  | Q410.00 | Fetal blood loss                                             |
| 43 | 23565  | L25..00 | Known or suspected fetal abnormality                         |
| 44 | 43428  | ZV28400 | [V]Screening for fetal growth retardation using ultrasonics  |
| 45 | 5479   | Q212.00 | Liveborn with prelabour fetal distress                       |
| 46 | 106201 | Qyu5400 | [X]Other specified fetal and neonatal haemorrhages           |
| 47 | 31481  | 7F04300 | Electrode applied to fetal scalp                             |
| 48 |        |         |                                                              |
| 49 |        |         |                                                              |
| 50 |        |         |                                                              |
| 51 |        |         |                                                              |
| 52 |        |         |                                                              |
| 53 |        |         |                                                              |
| 54 |        |         |                                                              |
| 55 |        |         |                                                              |
| 56 |        |         |                                                              |
| 57 |        |         |                                                              |
| 58 |        |         |                                                              |
| 59 |        |         |                                                              |
| 60 |        |         |                                                              |



|    |        |         |                                                               |
|----|--------|---------|---------------------------------------------------------------|
| 1  |        |         |                                                               |
| 2  |        |         |                                                               |
| 3  |        |         |                                                               |
| 4  | 107512 | Q102.11 | Fetal malnutrition without mention of 'light for dates'       |
| 5  | 96711  | Q408200 | Escherichia coli intra-amniotic fetal infection               |
| 6  | 98261  | 7F27y00 | OS non routine obstetric scan for fetal observations          |
| 7  | 43893  | Q470.00 | Idiopathic hydrops fetalis                                    |
| 8  | 19590  | 62O1.00 | Fetal movements felt                                          |
| 9  | 48576  | L22y.00 | Other fetal malposition and malpresentation                   |
| 10 | 64959  | 7F01100 | Fetosopic examination of fetus and sampling of fetal blood    |
| 11 | 36640  | L265300 | Maternal care for poor fetal growth                           |
| 12 | 59566  | Q41yz00 | Fetal or newborn haemorrhage NOS                              |
| 13 | 72837  | 2763    | O/E - fetal heart 40-80                                       |
| 14 | 62654  | 4H72.00 | Amniotic fetal cell abnormal                                  |
| 15 | 28977  | L237.00 | Other fetal abnormality causing disproportion                 |
| 16 | 46514  | L263700 | Maternal care for fetal hypoxia                               |
| 17 | 60301  | 7P0H500 | Fetal echocardiography                                        |
| 18 | 27801  | 2755    | O/E - fetal movement diminished                               |
| 19 | 67438  | Q40y000 | Intrauterine fetal sepsis, unspecified                        |
| 20 | 63905  | Lyu3A00 | [X]Maternal care/known or suspected fetal problem,unspecified |
| 21 | 46784  | Q023200 | Fetus/neonate affected by materno-fetal transplacental trans  |
| 22 | 50281  | Q213z00 | Liveborn with labour fetal distress NOS                       |
| 23 | 25153  | 2753    | O/E - fetal movements felt                                    |
| 24 | 103893 | 7F27400 | Fetal ascites scan                                            |
| 25 | 66619  | Q023011 | Fetus/neonate affected by feto-fetal transplacental transfus  |
| 26 | 101225 | BBK3400 | [M]Fetal rhabdomyoma                                          |
| 27 | 104765 | Q102.00 | Fetal malnutrition, no mention light or small for gest age    |
| 28 | 96669  | L22z.00 | Fetal malposition and malpresentation NOS                     |
| 29 | 55071  | Z271C00 | Fetal heart baseline pattern                                  |
| 30 | 22815  | 275..00 | O/E - fetal movements                                         |
| 31 | 69819  | 274Z.00 | O/E - fetal station NOS                                       |
| 32 | 56744  | Q10..11 | Fetal malnutrition                                            |
| 33 | 9164   | 584..11 | Fetal U-S scan                                                |
| 34 | 66175  | Q45z.00 | Fetal or newborn blood disorder NOS                           |
| 35 | 102019 | Q410600 | Fetal haemorrhage into mother's circulation                   |
| 36 | 104829 | L260000 | Fetal-maternal haemorrhage unspecified                        |
| 37 | 97471  | Q212z00 | Liveborn with prelabour fetal distress NOS                    |
| 38 | 100323 | 4H7..00 | Amniotic fetal cell study                                     |
| 39 | 73393  | 4H71.00 | Amniotic fetal cell study: NAD                                |
| 40 | 53296  | 42YG.00 | Fetal cell test                                               |
| 41 | 48798  | Q45..00 | Fetal and newborn blood disorders                             |
| 42 | 21893  | L510.00 | Maternal care for hydrops fetalis                             |
| 43 | 60774  | Z271100 | Fetal heart acceleration                                      |
| 44 | 62898  | 2768    | O/E - fetal heart 180-200                                     |
| 45 | 95881  | 2762    | O/E - fetal heart < 40                                        |
| 46 | 70856  | 2764    | O/E - fetal heart 80-100                                      |
| 47 | 67186  | 272Z.00 | O/E - fetal presentation NOS                                  |
| 48 | 38608  | L250.11 | Suspect fetal anencephaly                                     |
| 49 |        |         |                                                               |
| 50 |        |         |                                                               |
| 51 |        |         |                                                               |
| 52 |        |         |                                                               |
| 53 |        |         |                                                               |
| 54 |        |         |                                                               |
| 55 |        |         |                                                               |
| 56 |        |         |                                                               |
| 57 |        |         |                                                               |
| 58 |        |         |                                                               |
| 59 |        |         |                                                               |
| 60 |        |         |                                                               |

|    |        |         |                                                             |
|----|--------|---------|-------------------------------------------------------------|
| 1  |        |         |                                                             |
| 2  |        |         |                                                             |
| 3  | 8846   | L250.13 | Suspect fetal spina bifida                                  |
| 4  | 55152  | Q408.00 | Intra-amniotic fetal infection                              |
| 5  | 104218 | L300000 | Obstructed labour due to fetal malposition unspecified      |
| 6  | 99494  | Q455000 | Congenital anaemia from fetal blood loss                    |
| 7  | 91908  | 7F27200 | Fetal biometry                                              |
| 8  | 95754  | Q408z00 | Intra-amniotic fetal infection NOS                          |
| 9  | 62629  | Q41yy00 | Other specified fetal or newborn haemorrhage                |
| 10 | 95064  | Q41y.00 | Other fetal and newborn haemorrhage                         |
| 11 | 19575  | Q10z.00 | Fetal growth retardation NOS                                |
| 12 | 31033  | 7F03100 | Percutaneous insertion of fetal pleuroamniotic shunt        |
| 13 | 53241  | Q214100 | Liveborn with fetal hypoxia, unspecified                    |
| 14 | 26707  | 2766    | O/E - fetal heart 120-160                                   |
| 15 | 38846  | Z271D00 | Normal fetal heart baseline pattern                         |
| 16 | 44071  | Q479.00 | Non-immune hydrops fetalis                                  |
| 17 | 64335  | L263000 | Fetal distress unspecified                                  |
| 18 | 23590  | L300.00 | Obstructed labour due to fetal malposition                  |
| 19 | 102073 | Q410z00 | Fetal blood loss NOS                                        |
| 20 | 53687  | 2752    | O/E - fetal movements seen                                  |
| 21 | 42093  | 5846    | U-S scan - fetal maturity                                   |
| 22 | 3620   | Q214.00 | Liveborn with fetal distress, unspecified                   |
| 23 | 63024  | 2726    | O/E -fetal presentation unsure                              |
| 24 | 104845 | Q410700 | Fetal exsanguination                                        |
| 25 | 59679  | 276Z.00 | O/E - fetal heart NOS                                       |
| 26 | 100297 | L22zz00 | Fetal malposition and malpresentation NOS                   |
| 27 | 34777  | Q10..00 | Slow fetal growth and fetal malnutrition                    |
| 28 | 98499  | L25z300 | Maternal care for suspect fetal abnormal and damage, unspec |
| 29 | 96222  | L25z400 | Maternal care for fetal abnormality and damage, unspecified |
| 30 | 41908  | Q3z..00 | Fetal or newborn respiratory problems NOS                   |
| 31 | 28184  | Q436z00 | Unspecified fetal or neonatal jaundice NOS                  |
| 32 | 11589  | 7F25100 | Fetal heart monitoring in labour                            |
| 33 | 35680  | Q423.00 | Hydrops fetalis due to isoimmunisation                      |
| 34 | 45439  | Lyu3900 | [X]Maternal care/oth spcf known or suspected fetal problems |
| 35 | 12013  | L268000 | Reduced fetal movements                                     |
| 36 | 19581  | Q436.00 | Fetal and neonatal jaundice, unspecified                    |
| 37 | 32184  | L267500 | Other fetal problems                                        |
| 38 | 68996  | 2765    | O/E - fetal heart 100-120                                   |
| 39 | 62903  | 2767    | O/E - fetal heart 160-180                                   |
| 40 | 70845  | Z271E00 | Sinusoidal pattern of fetal heart                           |
| 41 | 52308  | Q211.00 | Fetal death due to labour anoxia                            |
| 42 | 101119 | 2769    | O/E - fetal heart > 200                                     |
| 43 | 27868  | 2761    | O/E - fetal heart not heard                                 |
| 44 | 39218  | 5858200 | Ultrasonic doppler for fetal heart sounds                   |
| 45 | 2437   | 2751    | O/E - no fetal movements                                    |
| 46 | 13276  | L263.00 | Fetal distress - affecting management                       |
| 47 | 49294  | L26..00 | Other fetal and placental problems                          |
| 48 |        |         |                                                             |
| 49 |        |         |                                                             |
| 50 |        |         |                                                             |
| 51 |        |         |                                                             |
| 52 |        |         |                                                             |
| 53 |        |         |                                                             |
| 54 |        |         |                                                             |
| 55 |        |         |                                                             |
| 56 |        |         |                                                             |
| 57 |        |         |                                                             |
| 58 |        |         |                                                             |
| 59 |        |         |                                                             |
| 60 |        |         |                                                             |

|    |        |         |                                                             |
|----|--------|---------|-------------------------------------------------------------|
| 1  |        |         |                                                             |
| 2  |        |         |                                                             |
| 3  |        |         |                                                             |
| 4  | 41919  | 5849    | U-S scan - fetal presentation                               |
| 5  | 72159  | 5845    | U-S scan - fetal cephalometry                               |
| 6  | 91933  | Q410000 | Fetal blood loss, unspecified                               |
| 7  | 85992  | 7F27.00 | Non routine obstetric scan for fetal observations           |
| 8  | 95538  | Z271B00 | Poor baseline variability in fetal heart rate               |
| 9  | 36195  | L268.00 | Other fetal problems                                        |
| 10 | 8147   | L264.11 | Fetal death in utero                                        |
| 11 | 94785  | 9Nk3.00 | Seen in fetal medicine clinic                               |
| 12 | 91477  | 7F03300 | Percutaneous insertion of fetal pleural drain               |
| 13 | 19720  | 7F25.11 | Fetal monitoring                                            |
| 14 | 983    | Q....11 | Fetal and neonatal conditions                               |
| 15 | 26710  | 272..00 | O/E - fetal presentation                                    |
| 16 | 45963  | 5847    | U-S scan - fetal abnormality                                |
| 17 | 46413  | L250.12 | Suspect fetal hydrocephaly                                  |
| 18 | 48801  | Q41..00 | Fetal and neonatal haemorrhage                              |
| 19 | 95875  | 7F27z00 | Non routine obstetric scan for fetal observations NOS       |
| 20 | 39868  | Q420.11 | Erythroblastosis fetalis                                    |
| 21 | 50201  | Q31..00 | Other fetal and newborn respiratory conditions              |
| 22 | 55607  | Z271900 | Fetal heart rate variability                                |
| 23 | 47149  | Z271F00 | Fetal heart deceleration                                    |
| 24 | 102894 | L260z00 | Fetal-maternal haemorrhage NOS                              |
| 25 | 91773  | Z271A00 | Good baseline variability in fetal heart rate               |
| 26 | 46502  | Q21..12 | Labour fetal anoxia                                         |
| 27 | 46431  | 7F04100 | Percutaneous sampling of fetal blood                        |
| 28 | 9501   | 7F25000 | Fetal heart monitoring NEC                                  |
| 29 | 19582  | Q493.00 | Persistent fetal circulation                                |
| 30 | 7681   | 276..00 | O/E - fetal heart heard                                     |
| 31 | 62316  | L51..00 | Maternal care for other known or suspected fetal problems   |
| 32 | 53420  | L263.13 | Fetal tachycardia                                           |
| 33 | 54004  | 7F03000 | Percutaneous insertion of fetal vesicoamniotic shunt        |
| 34 | 34132  | Q212.11 | Fetal distress before labour - liveborn                     |
| 35 | 42322  | Q213.00 | Liveborn with labour fetal distress                         |
| 36 | 20320  | Q210.00 | Fetal death due to prelabour anoxia                         |
| 37 | 107794 | 4H7Z.00 | Amniotic fetal cell study NOS                               |
| 38 | 106136 | Q410200 | Fetal placental blood loss                                  |
| 39 | 66335  | L260.00 | Fetal-maternal haemorrhage                                  |
| 40 | 53863  | L263z00 | Fetal distress NOS                                          |
| 41 | 41102  | L263500 | Lab+del comp fetal ht rate anom wth meconium in amnio fluid |
| 42 | 35214  | Z271912 | FHRV - Fetal heart rate variability                         |
| 43 | 26401  | Q214.11 | Fetal distress, unspecified when, liveborn                  |
| 44 | 54687  | L51X.00 | Maternal care/known or suspected fetal problem,unspecifd    |
| 45 | 37752  | 62O3.00 | Fetal maturity: dates = size                                |
| 46 | 55493  | 62O2.00 | Fetal movements seen                                        |
| 47 | 52857  | 275Z.00 | O/E - fetal movements NOS                                   |
| 48 | 110134 | Z271G00 | Early fetal heart deceleration                              |
| 49 |        |         |                                                             |
| 50 |        |         |                                                             |
| 51 |        |         |                                                             |
| 52 |        |         |                                                             |
| 53 |        |         |                                                             |
| 54 |        |         |                                                             |
| 55 |        |         |                                                             |
| 56 |        |         |                                                             |
| 57 |        |         |                                                             |
| 58 |        |         |                                                             |
| 59 |        |         |                                                             |
| 60 |        |         |                                                             |

|    |        |         |                                                              |
|----|--------|---------|--------------------------------------------------------------|
| 1  |        |         |                                                              |
| 2  |        |         |                                                              |
| 3  |        |         |                                                              |
| 4  | 13299  | Q42X.00 | Hydrops fetalis due to other+unspcfd haemolytic disease      |
| 5  | 100342 | PK81.00 | Fetal hydantoin syndrome                                     |
| 6  | 50913  | P7z..11 | Fetal circulation                                            |
| 7  | 51372  | Q311z11 | Pneumonitis due to fetal aspiration                          |
| 8  | 97985  | Z271H00 | Late fetal heart deceleration                                |
| 9  | 95649  | L263.11 | Fetal acidosis                                               |
| 10 | 48784  | 62O4.00 | Fetal maturity: dates not=size                               |
| 11 | 66428  | Q026.11 | Fetus affected by cord problems                              |
| 12 | 1017   | Q034.00 | Fetus or neonate affected by caesarean section               |
| 13 | 97885  | 7F01000 | Fetoscopic examination of fetus and biopsy of fetus          |
| 14 | 47151  | L220.00 | Fetus - unstable lie                                         |
| 15 | 97186  | 7F03z00 | Therapeutic percutaneous operation on fetus NOS              |
| 16 | 26685  | Q035600 | Fetus/neonate affected by other maternal opiates in lab/del  |
| 17 | 62776  | Q037.11 | Fetus or neonate affected by hypertonic labour               |
| 18 | 5538   | Q024.00 | Fetus or neonate affected by prolapsed cord                  |
| 19 | 91659  | Q022.00 | Fetus/neonate affected by placental abnormality NEC          |
| 20 | 105625 | Q027.00 | Fetus or neonate affected by chorioamnionitis                |
| 21 | 72118  | L257.00 | Fetus with damage due to intra-uterine contraceptive device  |
| 22 | 52007  | L255.00 | Fetus with drug damage                                       |
| 23 | 73892  | Q00z.00 | Fetus or neonate affected by maternal medical problem NOS    |
| 24 | 67326  | Q04X.00 | Fetus+newborn affected/other maternal noxious influences     |
| 25 | 69257  | L25y000 | Fetus with other damage NEC, unspecified                     |
| 26 | 71987  | Q007A00 | Fetus/neonate affect-plac./breast transf hypoglycaemic agent |
| 27 | 63290  | Q101.00 | Fetus small-for-dates with signs of malnutrition             |
| 28 | 52669  | Q031200 | Fetus/neonate affect persistent occip-posterior - labour/del |
| 29 | 61063  | L25zz00 | Fetus with damage NOS                                        |
| 30 | 99136  | Q021200 | Fetus/neonate affected by placental damage-amniocentesis     |
| 31 | 45440  | 7F00.00 | Therapeutic fetoscopic operations on fetus                   |
| 32 | 30979  | 7N61200 | [SO]Fetus                                                    |
| 33 | 69435  | 7F02z00 | Selective destruction of fetus NOS                           |
| 34 | 61452  | 7F0z.00 | Fetus and gravid uterus operations NOS                       |
| 35 | 46724  | Q022200 | Fetus or neonate affected by placental insufficiency         |
| 36 | 105097 | L250300 | Maternal care for suspected CNS malformation in fetus        |
| 37 | 52633  | Q021111 | Fetus affected by placental abruption                        |
| 38 | 36894  | Q100.11 | Fetus small-for-dates (SFD), without mention of malnutrition |
| 39 | 94808  | Q017600 | Fetus or neonate affected by face presentation before labour |
| 40 | 103741 | 7F2A211 | Doppler ultrasound scan of middle cerebral artery of fetus   |
| 41 | 51177  | L5...00 | Maternal care for fetus                                      |
| 42 | 106508 | 7F03600 | Percutaneous laser ablation of lesion of fetus               |
| 43 | 44173  | 5391    | Obstetric X-ray - fetus                                      |
| 44 | 38864  | L160.00 | Papyraceous fetus                                            |
| 45 | 48156  | Q025000 | Fetus or neonate affected by cord round neck                 |
| 46 | 59236  | L25z.00 | Fetus with damage NOS                                        |
| 47 | 53074  | L251z00 | Fetus with chromosomal abnormality NOS                       |
| 48 | 66699  | PK83.00 | Fetus and newborn affected by maternal use of alcohol        |
| 49 |        |         |                                                              |
| 50 |        |         |                                                              |
| 51 |        |         |                                                              |
| 52 |        |         |                                                              |
| 53 |        |         |                                                              |
| 54 |        |         |                                                              |
| 55 |        |         |                                                              |
| 56 |        |         |                                                              |
| 57 |        |         |                                                              |
| 58 |        |         |                                                              |
| 59 |        |         |                                                              |
| 60 |        |         |                                                              |

|    |        |         |                                                              |
|----|--------|---------|--------------------------------------------------------------|
| 1  |        |         |                                                              |
| 2  |        |         |                                                              |
| 3  |        |         |                                                              |
| 4  | 66571  | Qyu5200 | [X]Oth intracranial(nontraumatic)haemorrhages/fetus+newborn  |
| 5  | 31923  | Q021300 | Fetus/neonate affected by placental damage-caesarean section |
| 6  | 72366  | 7F02y00 | Other specified selective destruction of fetus               |
| 7  | 62819  | 7F04z00 | Diagnostic percutaneous examination of fetus NOS             |
| 8  | 72973  | Qyu5500 | [X]Other haemolytic diseases of fetus and newborn            |
| 9  | 45653  | Q025.00 | Fetus or neonate affected by other cord compression          |
| 10 | 23483  | Q023.00 | Fetus or neonate affected by placental transfusion syndrome  |
| 11 | 97240  | Q027100 | Fetus or neonate affected by amnionitis                      |
| 12 | 72834  | Q41z.00 | Haemorrhage of fetus and newborn NOS                         |
| 13 | 52950  | Q013.00 | Fetus or neonate affected by maternal polyhydramnios         |
| 14 | 41937  | 5848    | U-S scan - multiple fetus                                    |
| 15 | 63077  | Q00y.00 | Fetus or neonate affected by other maternal condition        |
| 16 | 34695  | L22..11 | Malpresentation of fetus                                     |
| 17 | 15495  | Q42z.00 | Haemolytic disease of fetus/newborn due isoimmunisation NOS  |
| 18 | 22032  | Q100.00 | Fetus small-for-dates, without mention of malnutrition       |
| 19 | 43005  | Q200012 | Intracranial haemorrhage in fetus or newborn                 |
| 20 | 36559  | Q200011 | Intracerebral haemorrhage in fetus or newborn                |
| 21 | 71279  | L250000 | Fetus with central nervous system malformation unspecified   |
| 22 | 40870  | Q020.00 | Fetus or neonate affected by placenta previa                 |
| 23 | 85238  | Qyu5F00 | [X]Intracranial nontraumatic haemorrhage fetus newborn unsp  |
| 24 | 106959 | Qyu0200 | [X]Fetus and newborn affected by other maternal conditions   |
| 25 | 46283  | 7F0..00 | Fetus and gravid uterus operations                           |
| 26 | 682    | Q42..00 | Haemolytic disease of fetus/newborn due to isoimmunisation   |
| 27 | 27334  | Q026z00 | Fetus or neonate affected by cord problems NOS               |
| 28 | 50530  | 7F0y.00 | Other specified operations on fetus or gravid uterus         |
| 29 | 28487  | Q....13 | Fetus and neonate conditions                                 |
| 30 | 71910  | Q037200 | Fetus or neonate affected by hypertonic uterine dysfunction  |
| 31 | 70737  | L25z000 | Fetus with damage NOS, unspecified                           |
| 32 | 56697  | Q041.00 | Fetus and newborn affect by mat use of nutritional chem subs |
| 33 | 54726  | L251400 | Maternal care for chromosomal abnormality in fetus           |
| 34 | 101599 | L253300 | Maternal care for damage to fetus from maternal rubella      |
| 35 | 101893 | L251300 | Maternal care for suspected chromosomal abnormality in fetus |
| 36 | 66526  | Q035200 | Fetus/neonate affected by mat general anaesthesia - lab/del  |
| 37 | 99890  | Q021400 | Fetus/neonate affect by placental damage-surgical induction  |
| 38 | 44479  | Q200511 | Intracerebral haematoma in fetus or newborn                  |
| 39 | 47219  | Q035300 | Fetus/neonate affected by mat epidural anaesth - labour/del  |
| 40 | 52526  | Q200600 | Extradural haemorrhage in fetus or newborn                   |
| 41 | 105735 | Q007B00 | Fetus/neonate affected-plac./breast transfer endocrine agent |
| 42 | 21382  | 27B..00 | O/E - viable fetus                                           |
| 43 | 100241 | L25y.00 | Fetus with other damage NEC                                  |
| 44 | 26840  | Q017500 | Fetus or neonate affected by unstable lie before labour      |
| 45 | 95128  | 9d06.00 | Fetus                                                        |
| 46 | 26631  | Q000.00 | Fetus or neonate affected by maternal hypertensive disease   |
| 47 | 73317  | L252.00 | Fetus with hereditary disease                                |
| 48 | 48583  | Q031600 | Fetus/neonate affected by disproportion during labour/delive |
| 49 |        |         |                                                              |
| 50 |        |         |                                                              |
| 51 |        |         |                                                              |
| 52 |        |         |                                                              |
| 53 |        |         |                                                              |
| 54 |        |         |                                                              |
| 55 |        |         |                                                              |
| 56 |        |         |                                                              |
| 57 |        |         |                                                              |
| 58 |        |         |                                                              |
| 59 |        |         |                                                              |
| 60 |        |         |                                                              |

|    |        |         |                                                              |
|----|--------|---------|--------------------------------------------------------------|
| 1  |        |         |                                                              |
| 2  |        |         |                                                              |
| 3  |        |         |                                                              |
| 4  | 71637  | Q017.11 | Fetus affected by malpresentation                            |
| 5  | 71495  | L250z00 | Fetus with central nervous system malformation NOS           |
| 6  | 60841  | Q013.11 | Fetus affected by hydramnios                                 |
| 7  | 55149  | Qyu0100 | [X]Fetus+newborn affectd/oth medical procedure on mother,NEC |
| 8  |        |         |                                                              |
| 9  | 100666 | L252z00 | Fetus with hereditary disease NOS                            |
| 10 | 66748  | Qyu0C00 | [X]Fetus+newborn affected/other maternal noxious influences  |
| 11 | 43958  | Q023000 | Fetus/neonate affected by twin-to-twin transplacental transf |
| 12 | 23617  | L22..00 | Malposition and malpresentation of fetus                     |
| 13 | 68016  | L253.11 | Fetus with suspected rubella damage via mother               |
| 14 | 65716  | Q011.00 | Fetus/neonate affected maternal premature rupture membrane   |
| 15 | 20721  | 7F0..11 | Fetus operations                                             |
| 16 |        |         |                                                              |
| 17 | 59580  | 7F0..12 | Fetus & gravid uterus ops                                    |
| 18 | 72558  | Q016.00 | Fetus or neonate affected by maternal death                  |
| 19 |        |         |                                                              |
| 20 | 38043  | Q200500 | Cerebral haematoma in fetus or newborn                       |
| 21 | 52299  | Q007200 | Fetus/neonate affected by placental/breast transfer narcotic |
| 22 | 68169  | Q021.00 | Fetus/neonate affect other placental separation/haemorrhage  |
| 23 | 37055  | Q035500 | Fetus/neonate affected by maternal pethidine in labour/deliv |
| 24 | 16963  | 7F00000 | Fetoscopic blood transfusion of fetus                        |
| 25 | 61596  | Q017300 | Fetus or neonate affected by oblique lie before labour       |
| 26 | 55761  | Q021500 | Fetus or neonate affected by premature placental separation  |
| 27 | 44644  | L250.00 | Fetus with central nervous system malformation               |
| 28 | 58187  | Lyu4500 | [X]Obstructed labour due to other abnormalities of fetus     |
| 29 | 108080 | Qyu0.00 | [X]Fetus/newborn affected by maternal factors+complications  |
| 30 | 91434  | L251.12 | Suspect mongol fetus                                         |
| 31 | 42661  | Q021011 | Fetus affected by APH - antepartum haemorrhage               |
| 32 | 63309  | Q037312 | Fetus/neonate affected by uterine dysfunction in labour/del  |
| 33 | 95638  | Q101.11 | Fetus small-for-dates (SFD) with signs of malnutrition       |
| 34 | 69015  | L251.11 | Suspect cystic fibrosis fetus                                |
| 35 | 64430  | Q007C00 | Fetus/neonate affected-plac./breast transfer addictive drug  |
| 36 | 59171  | Q017400 | Fetus or neonate affected by transverse lie before labour    |
| 37 | 57828  | 7F03200 | Percutaneous blood transfusion of fetus                      |
| 38 | 24701  | 2754    | O/E - fetus very active                                      |
| 39 | 72833  | Q02z.00 | Fetus/neonate affected by abnormalities chorion/amnion NOS   |
| 40 | 104029 | Qyu0B00 | [X]Fetus and newborn affected by other maternal medication   |
| 41 | 70901  | Q023100 | Fetus/neonate affected by feto-maternal transplacental trans |
| 42 | 7103   | Q000.11 | Fetus affected by maternal toxemia                           |
| 43 | 109421 | Q03y400 | Fetus or neonate affected by long labour                     |
| 44 | 20544  | Q031611 | Fetus/neonate affected-cephalopelvic disproportion lab./del. |
| 45 | 99563  | 27A..11 | O/E - VE - descent of fetus                                  |
| 46 | 50555  | Q012.00 | Fetus or neonate affected by maternal oligohydramnios        |
| 47 | 101603 | Q010.00 | Fetus or neonate affected by maternal incompetent cervix     |
| 48 | 72348  | Q007800 | Fetus/neonate affected-plac./breast transfer chemotherapy    |
| 49 | 30692  | L251.00 | Fetus with chromosomal abnormality                           |
| 50 | 45856  | Q002.00 | Fetus or neonate affected by maternal infections             |
| 51 | 49959  | Q005.00 | Fetus or neonate affected by maternal injury                 |

|        |         |                                                              |
|--------|---------|--------------------------------------------------------------|
| 93329  | Q007400 | Fetus/neonate affected-placental/breast transfer anti-infect |
| 72729  | L253.00 | Fetus with viral damage via mother                           |
| 63648  | Q021000 | Fetus/neonate affected by antepartum haemorrhage unspecified |
| 96742  | Q007300 | Fetus/neonate affected-placenta/breast transfer hallucinogen |
| 68851  | Q00..00 | Fetus or neonate affected by maternal medical problems       |
| 54690  | L250400 | Maternal care for CNS malformation in fetus                  |
| 108565 | Qyu0700 | [X]Fetus+newborn affectd/oth+unspcfd conditns/umbilical cord |
| 108626 | Qyu7.00 | [X]Digestive system disorders of fetus and newborn           |
| 38660  | Q3...00 | Fetus and newborn respiratory conditions                     |
| 42226  | Q017200 | Fetus or neonate affected by external version before labour  |
| 71951  | Q037300 | Fetus or neonate affected by uterine inertia or dysfunction  |
| 71552  | L235.00 | Large fetus causing disproportion                            |
| 67572  | Q031000 | Fetus/neonate affected by mat bony pelvis abn in labour/del  |
| 65059  | Qyu5.00 | [X]Haemorrhagic+haematolog disorders of fetus and newborn    |
| 68687  | L266300 | Suspected macroscopic fetus                                  |
| 52726  | Q031500 | Fetus/neonate affected by face presentation during labour/de |
| 27447  | Q031z00 | Fetus/neonate affected by malposition/disproportion NOS      |
| 54311  | Q02..00 | Fetus/neonate affected by complic of placenta/cord/membrane  |
| 100074 | 7F01.00 | Diagnostic endoscopic examination of fetus using fetoscope   |
| 101984 | 7F03.00 | Therapeutic percutaneous operations on fetus                 |
| 70393  | 7F04.00 | Diagnostic percutaneous examination of fetus                 |
| 102078 | Q027z00 | Fetus or neonate affected by chorioamnionitis                |
| 58773  | Q026.00 | Fetus or neonate affected by other specified cord problems   |
| 102535 | 7F00.12 | Therapeutic foetoscopic operations on fetus                  |
| 35777  | Q417.00 | Intracranial nontraumatic haemorrhage of fetus and newborn   |
| 31496  | Q007900 | Fetus/neonate affected-plac./breast transfer uterine depress |
| 107153 | Q007x00 | Fetus/neonate affected - placental/breast transfer toxic NEC |
| 40376  | PH11.00 | Harlequin fetus                                              |
| 56666  | L256.00 | Fetus with radiation damage                                  |
| 73323  | L254.00 | Fetus with damage due to other maternal disease              |
| 73373  | Q001.00 | Fetus or neonate affected by maternal renal/urinary disease  |
| 96331  | L258.00 | Fetus with cardiovascular abnormality                        |
| 105261 | Q007500 | Fetus/neonate affected-placental/breast transfer immune sera |
| 57651  | 7F02.00 | Selective destruction of fetus                               |
| 97611  | 7F03400 | Percutaneous insertion of bladder drain to fetus             |
| 108731 | 7F03y00 | Other specified therapeutic percutaneous operation on fetus  |
| 70074  | Q3y..00 | Other specified respiratory problems in fetus or neonate     |
| 69814  | Q022000 | Fetus or neonate affected by placental dysfunction           |
| 69533  | L257.12 | Fetus with damage due to intra-uterine contraceptive device  |
| 95909  | Q026400 | Fetus or neonate affected by vasa praevia of cord            |
| 55410  | L251000 | Fetus with chromosomal abnormality unspecified               |
| 37180  | 272..11 | O/E - lie of fetus                                           |
| 69076  | Q031300 | Fetus/neonate affected by shoulder presentation - labour/del |
| 61640  | L252000 | Fetus with hereditary disease unspecified                    |
| 96614  | Q035100 | Fetus/neonate affected by mat analgesic agent in labour/del  |

|    |        |         |                                                              |
|----|--------|---------|--------------------------------------------------------------|
| 1  |        |         |                                                              |
| 2  |        |         |                                                              |
| 3  | 42213  | Q021100 | Fetus or neonate affected by abruptio placentae              |
| 4  | 104989 | Q018.00 | Fetus or neonate affected by maternal postnatal depression   |
| 5  | 70739  | L25yz00 | Fetus with other damage NEC NOS                              |
| 6  | 42384  | Q031400 | Fetus or neonate affected by transverse lie in labour/deliv  |
| 7  | 72757  | Q007100 | Fetus/neonate affected by placental/breast transfer alcohol  |
| 8  | 51296  | Q03y200 | Fetus or neonate affected by induction of labour             |
| 9  | 111265 | Qyu6.00 | [X]Transitory endocr & metab disord specif to fetus/newborn  |
| 10 | 59070  | Q037.00 | Fetus or neonate affected by abnormal uterine contractions   |
| 11 | 97745  | Q007600 | Fetus/neonate affected-plac./breast transfer anticonvulsant  |
| 12 | 27670  | L255300 | Maternal care for (suspected) damage to fetus from alcohol   |
| 13 | 92824  | Q031z11 | Fetus or neonate affected by obstructed labour NEC           |
| 14 | 99473  | Q007.00 | Fetus/neonate affected by poison transferred placenta/breast |
| 15 | 50940  | 5391.11 | Fetus - abdominal X-ray, obst.                               |
| 16 | 72836  | Q007w00 | Fetus/neonate affected-placenta/breast transfer medicine NEC |
| 17 | 97923  | Q025200 | Fetus or neonate affected by knot in cord                    |
| 18 | 68577  | Q037100 | Fetus or neonate affected by hypertonic labour               |
| 19 | 70165  | Q016.11 | Fetus affected by maternal death                             |
| 20 | 107075 | L043z11 | Unspecified inevitable miscarriage without complication      |
| 21 | 94976  | L044x11 | Incomplete inevitable miscarriage with unspecified comp      |
| 22 | 17625  | L044.11 | Inevitable miscarriage incomp                                |
| 23 | 55404  | L045z11 | Complete inevitable miscarriage without complication         |
| 24 | 12241  | L02..11 | Missed miscarriage                                           |
| 25 | 107604 | L045211 | Complete inevitable miscarriage complicated by embolism      |
| 26 | 53836  | L044z11 | Incomplete inevitable miscarriage without complication       |
| 27 | 96949  | L02..12 | Silent miscarriage                                           |
| 28 | 11323  | L045.11 | Inevitable miscarriage complete                              |
| 29 | 108742 | L045x11 | Complete inevitable miscarriage with unspecified comp        |
| 30 | 109228 | L043y11 | Unspecified inevitable miscarriage with OS complication      |
| 31 | 11234  | L043.11 | Inevitable miscarriage unspecified                           |
| 32 | 92284  | L044y11 | Incomplete inevitable miscarriage with other specified comp  |
| 33 | 48603  | L040900 | Inevitable miscarriage                                       |
| 34 | 99578  | L043x11 | Unspecified inevitable miscarriage with unspec complication  |
| 35 | 165    | L04..11 | Miscarriage                                                  |
| 36 | 57576  | L045y11 | Complete inevitable miscarriage with OS complication         |
| 37 | 3082   | L04..00 | Spontaneous abortion                                         |
| 38 | 2187   | L05..00 | Legally induced abortion                                     |
| 39 | 68740  | L041x00 | Incomplete spontaneous abortion with complication NOS        |
| 40 | 63778  | L042x00 | Complete spontaneous abortion with complication NOS          |
| 41 | 69183  | L052100 | Complete legal abortion with delayed/excessive haemorrhage   |
| 42 | 102820 | L050200 | Unspecified legal abortion + damage to pelvic organs/tissues |
| 43 | 41098  | L050x00 | Unspecified legal abortion with complication NOS             |
| 44 | 106524 | L071100 | Unspecified incomplete abortion + delayed/excess haemorrhage |
| 45 | 25883  | L071y00 | Unspecified incomplete abortion + no mention of complication |
| 46 | 99736  | L042000 | Complete spontaneous abortion + genital tract/pelvic infect  |
| 47 | 99590  | L052w00 | Complete legal abortion with other specified complication    |
| 48 |        |         |                                                              |
| 49 |        |         |                                                              |
| 50 |        |         |                                                              |
| 51 |        |         |                                                              |
| 52 |        |         |                                                              |
| 53 |        |         |                                                              |
| 54 |        |         |                                                              |
| 55 |        |         |                                                              |
| 56 |        |         |                                                              |
| 57 |        |         |                                                              |
| 58 |        |         |                                                              |
| 59 |        |         |                                                              |
| 60 |        |         |                                                              |



|    |        |         |                                                              |
|----|--------|---------|--------------------------------------------------------------|
| 1  |        |         |                                                              |
| 2  |        |         |                                                              |
| 3  | 69190  | L052000 | Complete legal abortion + genital tract or pelvic infection  |
| 4  | 3874   | L031200 | Tubal abortion                                               |
| 5  | 56325  | L042y00 | Complete spontaneous abortion + no mention of complication   |
| 6  | 99955  | L040400 | Unspecified spontaneous abortion with metabolic disorder     |
| 7  | 60771  | L05..11 | Elective abortion                                            |
| 8  | 31431  | L05..13 | Therapeutic abortion                                         |
| 9  | 95625  | L044200 | Incomplete inevitable abortion complicated by embolism       |
| 10 | 40258  | L040011 | Spontaneous abortion with sepsis                             |
| 11 | 72593  | L044x00 | Incomplete inevitable abortion with unspecified complication |
| 12 | 49467  | L06..12 | Self-induced abortion                                        |
| 13 | 71289  | L06..11 | Criminal abortion                                            |
| 14 | 25605  | L100z00 | Threatened abortion NOS                                      |
| 15 | 58137  | L07z.00 | Unspecified abortion NOS                                     |
| 16 | 1886   | L072.00 | Unspecified abortion complete                                |
| 17 | 70643  | L070.00 | Unspecified abortion                                         |
| 18 | 56828  | L041w00 | Incomp spontaneous abortion + other specified complication   |
| 19 | 28605  | L051z00 | Incomplete legal abortion NOS                                |
| 20 | 38415  | L050z00 | Unspecified legal abortion NOS                               |
| 21 | 97991  | L062w00 | Complete illegal abortion with other specified complication  |
| 22 | 2034   | L10zz11 | Inevitable abortion                                          |
| 23 | 56224  | L070z00 | Unspecified abortion NOS                                     |
| 24 | 94404  | L061z00 | Incomplete illegal abortion NOS                              |
| 25 | 104747 | L040x00 | Unspecified spontaneous abortion with complication NOS       |
| 26 | 8173   | L043.00 | Inevitable abortion unspecified                              |
| 27 | 105470 | L040500 | Unspecified spontaneous abortion with shock                  |
| 28 | 102090 | L08y.00 | Failed attempted abortion with no mention of complication    |
| 29 | 68311  | L044y00 | Incomplete inevitable abortion with OS complication          |
| 30 | 9407   | 6776.11 | Abortion counselling                                         |
| 31 | 33501  | L045.00 | Inevitable abortion complete                                 |
| 32 | 1737   | L02..00 | Missed abortion                                              |
| 33 | 41606  | L06..00 | Illegally induced abortion                                   |
| 34 | 39470  | L08..00 | Failed attempted abortion                                    |
| 35 | 7413   | L041.00 | Spontaneous abortion incomplete                              |
| 36 | 1439   | L07..00 | Unspecified abortion                                         |
| 37 | 70384  | L050y00 | Unspecified legal abortion with no mention of complication   |
| 38 | 1879   | L071.00 | Unspecified abortion incomplete                              |
| 39 | 68938  | L040y00 | Unspec spontaneous abortion without mention of complication  |
| 40 | 49809  | LOA..00 | Failed attempted abortion                                    |
| 41 | 41783  | L041100 | Incomp spontaneous abortion + delayed/excessive haemorrhage  |
| 42 | 73445  | L050000 | Unspecified legal abortion + genital tract/pelvic infection  |
| 43 | 50612  | L052y00 | Complete legal abortion with no mention of complication      |
| 44 | 94359  | L042w00 | Complete spontaneous abortion + other specified complication |
| 45 | 68669  | L040w00 | Unspec spontaneous abortion + other specified complication   |
| 46 | 58085  | L052z00 | Complete legal abortion NOS                                  |
| 47 | 50903  | LOA2.00 | Failed medical abortion comp by delayed/excessive haem'ge    |
| 48 |        |         |                                                              |
| 49 |        |         |                                                              |
| 50 |        |         |                                                              |
| 51 |        |         |                                                              |
| 52 |        |         |                                                              |
| 53 |        |         |                                                              |
| 54 |        |         |                                                              |
| 55 |        |         |                                                              |
| 56 |        |         |                                                              |
| 57 |        |         |                                                              |
| 58 |        |         |                                                              |
| 59 |        |         |                                                              |
| 60 |        |         |                                                              |

|    |        |         |                                                              |
|----|--------|---------|--------------------------------------------------------------|
| 1  |        |         |                                                              |
| 2  |        |         |                                                              |
| 3  |        |         |                                                              |
| 4  | 33964  | L0A4.00 | Failed medical abortion, without complication                |
| 5  | 56822  | L050.00 | Legal abortion unspecified                                   |
| 6  | 51614  | L044z00 | Incomplete inevitable abortion without complication          |
| 7  | 41118  | L08z.00 | Failed attempted abortion NOS                                |
| 8  | 45806  | L070x00 | Unspecified abortion with complication NOS                   |
| 9  | 39754  | L051.11 | Medal abortion - incomplete                                  |
| 10 | 6730   | L051.12 | Surgical abortion - incomplete                               |
| 11 | 35184  | L071z00 | Unspecified incomplete abortion NOS                          |
| 12 | 105603 | L052500 | Complete legal abortion with shock                           |
| 13 | 107159 | L08x.00 | Failed attempted abortion with complication NOS              |
| 14 | 7817   | L042.00 | Spontaneous abortion complete                                |
| 15 | 106491 | L050100 | Unspecified legal abortion + delayed/excessive haemorrhage   |
| 16 | 66365  | L043y00 | Unspecified inevitable abortion with OS complication         |
| 17 | 47931  | L050w00 | Unspecified legal abortion with other specified complication |
| 18 | 47298  | L052.00 | Legal abortion complete                                      |
| 19 | 71529  | L060.00 | Illegal abortion unspecified                                 |
| 20 | 66561  | L062.00 | Illegal abortion complete                                    |
| 21 | 96418  | L06z.00 | Illegally induced abortion NOS                               |
| 22 | 56562  | L040z00 | Unspecified spontaneous abortion NOS                         |
| 23 | 47435  | L097200 | Readmission for retained produc of concept, illegal abortion |
| 24 | 72307  | L040000 | Unspec spontaneous abortion + genital tract/pelvic infection |
| 25 | 73443  | L051y00 | Incomplete legal abortion with no mention of complication    |
| 26 | 68936  | L051100 | Incomplete legal abortion + delayed or excessive haemorrhage |
| 27 | 96652  | L051w00 | Incomplete legal abortion with other specified complication  |
| 28 | 59084  | L071500 | Unspecified incomplete abortion with shock                   |
| 29 | 53229  | L060z00 | Unspecified illegal abortion NOS                             |
| 30 | 110905 | L070w00 | Unspecified abortion with other specified complication       |
| 31 | 29439  | L041z00 | Incomplete spontaneous abortion NOS                          |
| 32 | 21805  | L097300 | Readmission for retained produc of concept, unspec abortion  |
| 33 | 7114   | L044.00 | Inevitable abortion incomplete                               |
| 34 | 59572  | L0A3.00 | Failed medical abortion, complicated by embolism             |
| 35 | 22379  | L04z.00 | Spontaneous abortion NOS                                     |
| 36 | 59116  | L045x00 | Complete inevitable abortion with unspecified complication   |
| 37 | 12337  | L051.00 | Legal abortion incomplete                                    |
| 38 | 41379  | L052.11 | Medical abortion - complete                                  |
| 39 | 49849  | L052.12 | Surgical abortion - complete                                 |
| 40 | 906    | L100.00 | Threatened abortion                                          |
| 41 | 96598  | Z22CE00 | Number of induced abortions                                  |
| 42 | 29940  | L042z00 | Complete spontaneous abortion NOS                            |
| 43 | 94270  | L043x00 | Unspecified inevitable abortion with unspec complication     |
| 44 | 68511  | L040100 | Unspec spontaneous abortion + delayed/excessive haemorrhage  |
| 45 | 68110  | L043z00 | Unspecified inevitable abortion without complication         |
| 46 | 101218 | L051700 | Incomplete medical abortion                                  |
| 47 | 63777  | L045y00 | Complete inevitable abortion with OS complication            |
| 48 | 62659  | Lyu0200 | [X]Other abortion                                            |
| 49 |        |         |                                                              |
| 50 |        |         |                                                              |
| 51 |        |         |                                                              |
| 52 |        |         |                                                              |
| 53 |        |         |                                                              |
| 54 |        |         |                                                              |
| 55 |        |         |                                                              |
| 56 |        |         |                                                              |
| 57 |        |         |                                                              |
| 58 |        |         |                                                              |
| 59 |        |         |                                                              |
| 60 |        |         |                                                              |

|    |        |         |                                                              |
|----|--------|---------|--------------------------------------------------------------|
| 1  |        |         |                                                              |
| 2  |        |         |                                                              |
| 3  |        |         |                                                              |
| 4  | 101050 | L062000 | Complete illegal abortion + genital tract/pelvic infection   |
| 5  | 33770  | L05z.00 | Legally induced abortion NOS                                 |
| 6  | 101666 | L070300 | Unspecified abortion with renal failure                      |
| 7  | 105921 | L072y00 | Unspecified complete abortion + no mention of complication   |
| 8  | 107171 | L042100 | Complete spontaneous abortion +delayed/excessive haemorrhage |
| 9  | 42458  | L040.00 | Spontaneous abortion unspecified                             |
| 10 | 50653  | L041y00 | Incomp spontaneous abortion with no mention of complication  |
| 11 | 67076  | L052x00 | Complete legal abortion with complication NOS                |
| 12 | 4708   | 7E08800 | Dilation and curettage removal of missed abortion            |
| 13 | 30276  | L041z11 | Retained products after spontaneous abortion                 |
| 14 | 29594  | L072z00 | Unspecified complete abortion NOS                            |
| 15 | 23693  | L097100 | Readmission for retained produc of concept, legal abortion   |
| 16 | 35701  | L100000 | Threatened abortion unspecified                              |
| 17 | 33989  | L045z00 | Complete inevitable abortion without complication            |
| 18 | 45340  | L040111 | Spontaneous abortion with heavy bleeding                     |
| 19 | 102648 | 6776100 | Pre-termination counselling                                  |
| 20 | 17294  | 6776.13 | Termination counselling                                      |
| 21 | 100568 | 7F10y00 | Other specified surgical induction of labour                 |
| 22 | 96821  | Q212000 | Liveborn with prelabour abnormal heart beat                  |
| 23 | 23664  | 63E..00 | Labour details                                               |
| 24 | 97459  | L300700 | Obstructed labour due to compound presentation               |
| 25 | 64976  | Z243200 | First stage of labour not established                        |
| 26 | 73308  | L29z.00 | Problems affecting labour NOS                                |
| 27 | 66578  | L31..00 | Abnormal forces of labour                                    |
| 28 | 54127  | Z255.00 | Observation of second stage of labour                        |
| 29 | 109523 | L307000 | Other failed trial of labour unspecified                     |
| 30 | 102969 | Q213200 | Liveborn with labour meconium in liquor                      |
| 31 | 29434  | 63E3.00 | Normal labour                                                |
| 32 | 23316  | L140.11 | False labour                                                 |
| 33 | 72779  | L30z.00 | Obstructed labour NOS                                        |
| 34 | 67423  | Z23AG00 | Hypertonic lower uterine segment during labour               |
| 35 | 72736  | Z246200 | Onset of labour first stage                                  |
| 36 | 20809  | L14..00 | Early or threatened labour                                   |
| 37 | 3088   | 7F11.00 | Other induction of labour                                    |
| 38 | 108764 | L29y.00 | Other problems affecting labour                              |
| 39 | 23525  | L141.00 | Other threatened labour                                      |
| 40 | 34981  | 7F10z00 | Surgical induction of labour NOS                             |
| 41 | 64395  | Z255D00 | Ability to push in labour                                    |
| 42 | 70850  | Q212100 | Liveborn with prelabour hypoxia                              |
| 43 | 103105 | L293.00 | Septicaemia during labour                                    |
| 44 | 63287  | Z24..00 | Labour observations                                          |
| 45 | 83541  | Z243500 | Normal length of first stage of labour                       |
| 46 | 49302  | Z243100 | First stage of labour established                            |
| 47 | 33632  | 7F11200 | Syntocinon induction of labour                               |
| 48 | 93041  | Z246700 | Onset of second stage of labour                              |
| 49 |        |         |                                                              |
| 50 |        |         |                                                              |
| 51 |        |         |                                                              |
| 52 |        |         |                                                              |
| 53 |        |         |                                                              |
| 54 |        |         |                                                              |
| 55 |        |         |                                                              |
| 56 |        |         |                                                              |
| 57 |        |         |                                                              |
| 58 |        |         |                                                              |
| 59 |        |         |                                                              |
| 60 |        |         |                                                              |

|    |        |         |                                                             |
|----|--------|---------|-------------------------------------------------------------|
| 1  |        |         |                                                             |
| 2  |        |         |                                                             |
| 3  |        |         |                                                             |
| 4  | 64692  | L141z00 | Other threatened labour NOS                                 |
| 5  | 92738  | ZNA2300 | Does perform labouring activities                           |
| 6  | 36756  | L386.00 | Toxic reaction to local anaesthesia during labour and deliv |
| 7  | 49858  | Z23G.00 | Uterine observation in labour                               |
| 8  | 64206  | L313z00 | Precipitate labour NOS                                      |
| 9  | 109569 | L313000 | Precipitate labour unspecified                              |
| 10 | 25428  | Z246211 | Start of labour                                             |
| 11 | 23674  | L291.11 | Failed medical induction of labour                          |
| 12 | 87342  | Z244100 | Observation of duration of labour                           |
| 13 | 50876  | H472.00 | Asp pneumonitis due to anaesthesia during labour and deliv  |
| 14 | 93735  | Z246A00 | Total duration of labour                                    |
| 15 | 71189  | Z244400 | Late onset of labour                                        |
| 16 | 22115  | 7F10.00 | Surgical induction of labour                                |
| 17 | 59789  | L14z.00 | Early or threatened labour NOS                              |
| 18 | 54167  | 6322    | 2nd stage of labour length                                  |
| 19 | 44337  | L307.00 | Failed trial of labour unspecified                          |
| 20 | 32555  | L351000 | Rupture of uterus during and after labour unspecified       |
| 21 | 3004   | L14..11 | Premature labour                                            |
| 22 | 30782  | 632Z.00 | Length of labour NOS                                        |
| 23 | 65867  | 7M35011 | Entonox analgesia in labour                                 |
| 24 | 23549  | L31z.00 | Abnormality of forces of labour NOS                         |
| 25 | 66242  | Z243400 | Rapid first stage of labour                                 |
| 26 | 59445  | Z243800 | First stage of labour problem                               |
| 27 | 94809  | Z256200 | Prolonged third stage of labour                             |
| 28 | 99290  | Z255800 | Second stage of labour problem                              |
| 29 | 40448  | 7F11100 | Induction of labour using prostaglandins                    |
| 30 | 56873  | ZNA2200 | Unable to perform labouring activities                      |
| 31 | 88775  | 7F11300 | Medical induction of labour                                 |
| 32 | 40724  | Z255700 | Failure to progress in second stage of labour               |
| 33 | 45057  | OZ3Z.00 | Other labourer NOS                                          |
| 34 | 95570  | L307z00 | Failed trial of labour NOS                                  |
| 35 | 64732  | Q213000 | Liveborn with labour abnormal heart beat                    |
| 36 | 57002  | L290.11 | Failed mechanical induction of labour                       |
| 37 | 13215  | 632..00 | Length of labour                                            |
| 38 | 48484  | Z244500 | Relation of onset of labour to due date                     |
| 39 | 49953  | 6323    | 3rd stage of labour length                                  |
| 40 | 33421  | 7F11000 | Oxytocic induction of labour                                |
| 41 | 35628  | L321.00 | Prolonged labour unspecified                                |
| 42 | 100252 | Z255J00 | Pushing involuntarily in labour                             |
| 43 | 98422  | Q213100 | Liveborn with labour hypoxia                                |
| 44 | 63022  | L281500 | Prem rupture of membranes onset of labour after 24 hours    |
| 45 | 103000 | L29yz00 | Other problems affecting labour NOS                         |
| 46 | 98003  | Z23B400 | Contraction of uterus during labour                         |
| 47 | 73319  | L302.00 | Obstructed labour caused by pelvic soft tissues             |
| 48 | 55225  | L32z.00 | Prolonged labour NOS                                        |
| 49 |        |         |                                                             |
| 50 |        |         |                                                             |
| 51 |        |         |                                                             |
| 52 |        |         |                                                             |
| 53 |        |         |                                                             |
| 54 |        |         |                                                             |
| 55 |        |         |                                                             |
| 56 |        |         |                                                             |
| 57 |        |         |                                                             |
| 58 |        |         |                                                             |
| 59 |        |         |                                                             |
| 60 |        |         |                                                             |

|    |        |         |                                                             |
|----|--------|---------|-------------------------------------------------------------|
| 1  |        |         |                                                             |
| 2  |        |         |                                                             |
| 3  |        |         |                                                             |
| 4  | 41036  | 7M35000 | Gas and air analgesia in labour                             |
| 5  | 104405 | Z256100 | Normal length of third stage of labour                      |
| 6  | 71720  | L350z00 | Rupture of uterus before labour NOS                         |
| 7  | 60124  | Z243411 | Rapid progress in first stage of labour                     |
| 8  | 71171  | L350000 | Rupture of uterus before labour unspecified                 |
| 9  | 106135 | Z244200 | Long duration of labour                                     |
| 10 | 94874  | Z244300 | Short duration of labour                                    |
| 11 | 103154 | L321z00 | Prolonged labour NOS                                        |
| 12 | 65243  | L141000 | Other threatened labour unspecified                         |
| 13 | 60255  | L351z00 | Rupture of uterus during and after labour NOS               |
| 14 | 99968  | L321000 | Unspecified prolonged labour, unspecified                   |
| 15 | 3272   | 7F11z00 | Other induction of labour NOS                               |
| 16 | 44306  | L126600 | Eclampsia in labour                                         |
| 17 | 48708  | Z244411 | Postmature labour                                           |
| 18 | 95354  | Z255300 | Progress of second stage of labour                          |
| 19 | 62622  | L30z000 | Obstructed labour NOS, unspecified                          |
| 20 | 108419 | L38X.00 | Complication of anaesthesia during labour and deliv unsp    |
| 21 | 40702  | Z243600 | Slow progress in first stage of labour                      |
| 22 | 37267  | L301400 | Obstructed labour due to generally contracted pelvis        |
| 23 | 61611  | 7F1A400 | Trial of labour NEC                                         |
| 24 | 22261  | Z241100 | Onset of labour induced                                     |
| 25 | 65900  | Z243300 | Progress of labour - first stage                            |
| 26 | 32997  | 6321    | 1st stage of labour length                                  |
| 27 | 29071  | 7L16000 | Intravenous induction of labour                             |
| 28 | 54596  | L140200 | False labour at or after 37 completed weeks of gestation    |
| 29 | 42101  | L140z00 | Threatened premature labour NOS                             |
| 30 | 32877  | L350.00 | Ruptured uterus before labour                               |
| 31 | 107198 | L292000 | Unspecified maternal pyrexia during labour, unspecified     |
| 32 | 97907  | L29..00 | Other problems affecting labour                             |
| 33 | 819    | L30..00 | Obstructed labour                                           |
| 34 | 24447  | 7F25.13 | Monitoring during labour                                    |
| 35 | 73331  | Z246900 | Duration of second stage of labour                          |
| 36 | 21626  | 63E1.00 | Spontaneous onset of labour                                 |
| 37 | 100563 | L302000 | Obstructed labour caused by pelvic soft tissues unspecified |
| 38 | 23548  | L301.00 | Obstructed labour caused by bony pelvis                     |
| 39 | 104746 | L302z00 | Obstructed labour caused by pelvic soft tissues NOS         |
| 40 | 48602  | L32..00 | Long labour                                                 |
| 41 | 36655  | Z245.00 | Observation of blood loss in labour                         |
| 42 | 99170  | Z243.00 | Observation of first stage of labour                        |
| 43 | 25112  | Z241.00 | Labour established                                          |
| 44 | 56915  | Z249.00 | Labour problem                                              |
| 45 | 62656  | Z255400 | Rapid second stage of labour                                |
| 46 | 94396  | L30zz00 | Obstructed labour NOS                                       |
| 47 | 29529  | L351.00 | Rupture of uterus during and after labour                   |
| 48 | 102136 | L292z00 | Unspecified maternal pyrexia during labour NOS              |
| 49 |        |         |                                                             |
| 50 |        |         |                                                             |
| 51 |        |         |                                                             |
| 52 |        |         |                                                             |
| 53 |        |         |                                                             |
| 54 |        |         |                                                             |
| 55 |        |         |                                                             |
| 56 |        |         |                                                             |
| 57 |        |         |                                                             |
| 58 |        |         |                                                             |
| 59 |        |         |                                                             |
| 60 |        |         |                                                             |

|    |        |         |                                                              |
|----|--------|---------|--------------------------------------------------------------|
| 1  |        |         |                                                              |
| 2  |        |         |                                                              |
| 3  | 40080  | 7F11y00 | Other specified other induction of labour                    |
| 4  | 46297  | Z246311 | Onset of labour pains                                        |
| 5  | 60333  | L301500 | Obstructed labour due to pelvic inlet contraction            |
| 6  | 85226  | Lyu4000 | [X]Other failed induction of labour                          |
| 7  |        |         |                                                              |
| 8  | 103056 | Z244.00 | Observation of pattern of labour                             |
| 9  | 64548  | L281300 | Prem rupture of membranes onset of labour within 24 hours    |
| 10 | 68319  | L351300 | Rupture of uterus during/after labour with postnatal problem |
| 11 | 62278  | L281400 | Premature rupture of membranes, labour delayed by therapy    |
| 12 | 22613  | Z248.00 | Normal labour                                                |
| 13 | 90775  | Z246.00 | Observation of measures of labour                            |
| 14 | 70150  | Z246100 | Duration of labour                                           |
| 15 | 28928  | L140.00 | Threatened premature labour                                  |
| 16 | 93205  | Z255F00 | Not pushing well in labour                                   |
| 17 | 99660  | L300400 | Obstructed labour due to face presentation                   |
| 18 | 48274  | Q212200 | Liveborn with prelabour meconium in liquor                   |
| 19 | 59296  | L140000 | Threatened premature labour unspecified                      |
| 20 | 9294   | L292.00 | Maternal pyrexia during labour, unspecified                  |
| 21 | 28830  | Z242.00 | Labour not established                                       |
| 22 | 104206 | L29z000 | Problems affecting labour NOS unspecified                    |
| 23 | 28700  | 7F1..11 | Labour operations                                            |
| 24 | 30001  | L313.00 | Precipitate labour                                           |
| 25 | 104716 | Z255E11 | Pushing well in labour                                       |
| 26 | 98918  | Z247100 | Expulsion of IUCD during third stage of labour               |
| 27 | 62600  | L29zz00 | Problems affecting labour NOS                                |
| 28 | 364    | 7F13111 | Lower uterine segment caesarean section (LSCS) NEC           |
| 29 | 13315  | 14Y0.00 | Born by caesarean section                                    |
| 30 | 13316  | 14Y6.00 | Born by emergency caesarean section                          |
| 31 | 29155  | 7F1A000 | Caesarean hysterectomy                                       |
| 32 | 10049  | 7F12111 | Elective lower uterine segment caesarean section (LSCS)      |
| 33 | 12118  | 7F13300 | Emergency caesarean section                                  |
| 34 | 72513  | 7F13200 | Extraperitoneal caesarean section                            |
| 35 | 15361  | 14Y2.00 | Born by elective caesarean section                           |
| 36 | 8192   | Q473.00 | Other hypothermia of newborn                                 |
| 37 | 3007   | Q316.00 | Newborn transitory tachypnoea                                |
| 38 | 100616 | ZV30100 | [V]Singleton, born before admission to hospital              |
| 39 | 93976  | Qyu4200 | [X]Other bacterial sepsis of newborn                         |
| 40 | 56336  | Q40A100 | Sepsis of newborn due to Escherichia coli                    |
| 41 | 66999  | Q474111 | Newborn environmental hyperthermia                           |
| 42 | 15985  | ZV32.00 | [V]Twin, mate stillborn                                      |
| 43 | 59878  | Q463.00 | Transitory ileus of newborn                                  |
| 44 | 10452  | 6333    | Twins - both live born                                       |
| 45 | 93999  | 6339    | Triplets - 3 still born                                      |
| 46 | 99418  | Q482.00 | Central nervous system dysfunction in newborn NOS            |
| 47 | 41064  | Q484.00 | Newborn drug reaction and intoxication                       |
| 48 | 56888  | Q483000 | Newborn feeding problem, unspecified                         |
| 49 |        |         |                                                              |
| 50 |        |         |                                                              |
| 51 |        |         |                                                              |
| 52 |        |         |                                                              |
| 53 |        |         |                                                              |
| 54 |        |         |                                                              |
| 55 |        |         |                                                              |
| 56 |        |         |                                                              |
| 57 |        |         |                                                              |
| 58 |        |         |                                                              |
| 59 |        |         |                                                              |
| 60 |        |         |                                                              |

|    |        |         |                                                              |
|----|--------|---------|--------------------------------------------------------------|
| 1  |        |         |                                                              |
| 2  |        |         |                                                              |
| 3  |        |         |                                                              |
| 4  | 13304  | Q480.12 | Seizures in newborn                                          |
| 5  | 53052  | Q425.00 | Late anaemia of newborn due to isoimmunisation               |
| 6  | 98857  | ZV31200 | [V]Twin, not hospitalised, mate live born                    |
| 7  | 38852  | Q311300 | Aspiration of vomit in newborn                               |
| 8  |        |         |                                                              |
| 9  | 104697 | G520000 | Acute aseptic myocarditis of the newborn                     |
| 10 | 55878  | Q494.00 | Transient myocardial ischaemia of newborn                    |
| 11 | 108976 | 6318    | Born in hospital                                             |
| 12 | 19577  | Q417100 | Cerebellar (nontraum) and post fossa haemorrhage fet newborn |
| 13 | 108501 | Q484z00 | Newborn drug reaction or intoxication NOS                    |
| 14 | 88204  | ZV30000 | [V]Singleton, born in hospital                               |
| 15 | 98669  | Qyu4100 | [X]Sepsis/newborn due to other+unspecified staphylococcus    |
| 16 | 15457  | Q482y00 | Other newborn abnormal cerebral signs                        |
| 17 | 21839  | Q480.11 | Fits in newborn                                              |
| 18 |        |         |                                                              |
| 19 | 12085  | Q404.11 | Umbilical stump infection of the newborn                     |
| 20 | 72669  | Q452.00 | Newborn disseminated intravascular coagulation               |
| 21 | 20083  | Q450.00 | Haemorrhagic disease of the newborn                          |
| 22 | 38877  | R024z00 | [D]Jaundice (not of newborn) NOS                             |
| 23 | 8515   | Q31y111 | Cyanotic attacks of the newborn                              |
| 24 | 110616 | 6338    | Triplets-1 live+ 2 still born                                |
| 25 | 57128  | 6336    | Triplets - all live born                                     |
| 26 | 21468  | ZV29100 | [V]Newborn receiving special care                            |
| 27 | 14813  | Q481.00 | Newborn cerebral irritability, unspecified                   |
| 28 | 17482  | Q474211 | Thermal injury in newborn NEC                                |
| 29 | 47693  | Q40W.00 | Sepsis of newborn due to other+unspecified streptococci      |
| 30 | 98366  | Qyu4800 | [X]Sepsis of newborn due to other+unspecified streptococci   |
| 31 | 23015  | 6334    | Twins - 1 still + 1 live born                                |
| 32 | 106918 | Q44X.00 | Trans disorder carbohydrate metab of fet and newborn unsp    |
| 33 | 57783  | Q417000 | Intracerebral (nontraumatic) haemorrhage of fet and newborn  |
| 34 | 9477   | Q483.00 | Feeding problems in newborn                                  |
| 35 | 32703  | Q21z.12 | Hypoxia in newborn NOS                                       |
| 36 | 36071  | Q21z.11 | Anoxia in newborn NOS                                        |
| 37 | 70538  | Q475.00 | Oedema of newborn unspecified                                |
| 38 | 13300  | Q477.00 | Newborn breast engorgement                                   |
| 39 | 56476  | Q482z00 | Central nervous system dysfunction in newborn NOS            |
| 40 | 34502  | 6335    | Twins - both still born                                      |
| 41 | 63044  | ZV31z00 | [V]Twin, mate liveborn, NOS                                  |
| 42 | 19579  | Q448.00 | Newborn late metabolic acidosis                              |
| 43 | 90510  | Q44T.00 | Transitory metabolic disturbance of newborn, unspecified     |
| 44 | 64600  | Q042.00 | Fet newborn affect mat exposure to environml chem subs       |
| 45 | 89262  | Q474z00 | Newborn temperature regulation disorder NOS                  |
| 46 | 73978  | Qyu3800 | [X]Other apnoea of newborn                                   |
| 47 | 22031  | Q40y200 | Septicaemia of newborn                                       |
| 48 | 45750  | Q4z..13 | Newborn death                                                |
| 49 | 105039 | 44qW000 | Newborn blood spot screening                                 |
| 50 | 98938  | Qyu6C00 | [X]Transitory metabolic disturbance of newborn, unspecified  |
| 51 |        |         |                                                              |
| 52 |        |         |                                                              |
| 53 |        |         |                                                              |
| 54 |        |         |                                                              |
| 55 |        |         |                                                              |
| 56 |        |         |                                                              |
| 57 |        |         |                                                              |
| 58 |        |         |                                                              |
| 59 |        |         |                                                              |
| 60 |        |         |                                                              |

|    |        |         |                                                              |
|----|--------|---------|--------------------------------------------------------------|
| 1  |        |         |                                                              |
| 2  |        |         |                                                              |
| 3  |        |         |                                                              |
| 4  | 19585  | Q483200 | Slow feeding in newborn                                      |
| 5  | 55895  | Q474200 | Hyperthermia in newborn, unspecified                         |
| 6  | 31476  | 9114.11 | FP58 - newborn registration                                  |
| 7  | 68065  | 9114.12 | GP58 - newborn registration                                  |
| 8  |        |         |                                                              |
| 9  | 104239 | Q48F.00 | Hypoxic ischaemic encephalopathy of newborn                  |
| 10 | 69413  | ZV33000 | [V]Twin, unspecified, born in hospital                       |
| 11 | 54589  | D400700 | Acquired neutropenia in newborn                              |
| 12 | 26871  | Q318.00 | Primary sleep apnoea of newborn                              |
| 13 |        |         |                                                              |
| 14 | 105139 | Qyu3700 | [X]Other and unspecified atelectasis of newborn              |
| 15 | 93859  | Qyu8400 | [X]Hypothermia of newborn, unspecified                       |
| 16 | 20478  | ZV27200 | [V]Twins, both live born                                     |
| 17 |        |         |                                                              |
| 18 | 42527  | Q42..11 | Isoimmunisation of newborn                                   |
| 19 | 98721  | P320011 | Newborn glaucoma                                             |
| 20 | 19947  | ZV31.00 | [V]Twin, mate live born                                      |
| 21 |        |         |                                                              |
| 22 | 97799  | Qyu3900 | [X]Other specified respiratory conditions of newborn         |
| 23 | 3613   | Q40A.00 | Sepsis of the newborn                                        |
| 24 | 109480 | 44qW100 | Completion of newborn blood spot screening card              |
| 25 | 40296  | Q46X.00 | Intestinal obstruction of newborn, unspecified               |
| 26 |        |         |                                                              |
| 27 | 39165  | Q483100 | Newborn regurgitation of food                                |
| 28 | 3615   | Q436200 | Newborn physiological jaundice NOS                           |
| 29 | 72352  | Q474300 | Transitory fever of newborn                                  |
| 30 |        |         |                                                              |
| 31 | 40867  | Q485100 | Withdrawal symptoms from therapeutic use of drugs in newborn |
| 32 | 61943  | Q483400 | Rumination in newborn                                        |
| 33 |        |         |                                                              |
| 34 | 5173   | Q421.11 | ABO isoimmunisation of the newborn                           |
| 35 | 5218   | 6316    | Born before arrival                                          |
| 36 | 56210  | Q311100 | Aspiration of liquor or mucus in newborn                     |
| 37 | 109128 | Qyu5100 | [X]Other umbilical haemorrhages of newborn                   |
| 38 | 108994 | 13lf000 | Unborn child is cause for safeguarding concern               |
| 39 |        |         |                                                              |
| 40 | 43366  | Q207011 | Phrenic nerve palsy in newborn                               |
| 41 | 52525  | Q462.00 | Newborn swallowing maternal blood - haematemesis/melaena     |
| 42 | 61729  | Q482100 | Coma in newborn                                              |
| 43 | 99425  | QyuA400 | [X]Disorder of muscle tone of newborn, unspecified           |
| 44 |        |         |                                                              |
| 45 | 47446  | Q474000 | Newborn dehydration fever                                    |
| 46 | 44256  | 9Ea4.00 | Unborn child at risk physi/ment abnormal serious handicap    |
| 47 | 61800  | Q437z00 | Kernicterus of newborn NOS                                   |
| 48 |        |         |                                                              |
| 49 | 104301 | 13lv000 | Unborn child subject to child protection plan                |
| 50 | 34504  | Q485.00 | Newborn drug withdrawal syndrome                             |
| 51 | 23876  | Q487.00 | Umbilical polyp of newborn                                   |
| 52 | 56909  | Q411200 | Intraventric (nontraumatic) haemorrhage grade 3 fet newborn  |
| 53 |        |         |                                                              |
| 54 | 41053  | Q483z11 | Bottle feeding problem in the newborn                        |
| 55 | 95873  | Q446600 | Disturbances of potassium balance of newborn                 |
| 56 | 52577  | Q483500 | Underfeeding in newborn                                      |
| 57 |        |         |                                                              |
| 58 | 28758  | ZV29200 | [V]Newborn receiving intensive care                          |
| 59 | 47227  | ZV27300 | [V]Twins, one live born and one stillborn                    |
| 60 | 38890  | ZV27400 | [V]Twins, both stillborn                                     |



|    |        |         |                                                             |
|----|--------|---------|-------------------------------------------------------------|
| 1  |        |         |                                                             |
| 2  |        |         |                                                             |
| 3  |        |         |                                                             |
| 4  | 44238  | ZV31000 | [V]Twin, born in hospital, mate live born                   |
| 5  | 50017  | Q472.00 | Newborn cold injury syndrome                                |
| 6  | 101103 | Q214200 | Liveborn with meconium liquor, unspecified                  |
| 7  | 109703 | 41G4.00 | Newborn blood spot specimen received                        |
| 8  |        |         |                                                             |
| 9  | 98336  | Q311113 | Aspiration of amniotic fluid in newborn                     |
| 10 | 64262  | Q311112 | Aspiration of liquor in newborn                             |
| 11 | 36845  | Q311111 | Aspiration of mucus in newborn                              |
| 12 | 73521  | QyuA200 | [X]Other disorders of muscle tone of newborn                |
| 13 | 72705  | QyuA000 | [X]Oth specified disturbances of cerebral status of newborn |
| 14 | 57674  | Q411100 | Intraventric (nontraumatic) haemorrhage grade 2 fet newborn |
| 15 | 65792  | Q484000 | Grey syndrome of newborn                                    |
| 16 |        |         |                                                             |
| 17 | 68254  | Q474100 | Newborn environmental pyrexia                               |
| 18 | 19576  | Q31y600 | Apnoea of newborn                                           |
| 19 |        |         |                                                             |
| 20 | 97418  | Q30..12 | Pulmonary hypoperfusion syndrome of newborn                 |
| 21 | 108359 | ZV30200 | [V]Singleton, born outside hospital and not hospitalised    |
| 22 | 101529 | ZV32z00 | [V]Twin, mate stillborn, NOS                                |
| 23 |        |         |                                                             |
| 24 | 86001  | ZV32000 | [V]Twin, born in hospital, mate stillborn                   |
| 25 | 95736  | Qyu8000 | [X]Other hypothermia of newborn                             |
| 26 |        |         |                                                             |
| 27 | 48664  | Q444111 | Hypocalcaemic tetany in newborn                             |
| 28 | 11509  | Q483300 | Vomiting in newborn                                         |
| 29 | 99244  | Q446500 | Disturbances of sodium balance of newborn                   |
| 30 | 19578  | Q483600 | Overfeeding in newborn                                      |
| 31 |        |         |                                                             |
| 32 | 39691  | Q40A000 | Sepsis of newborn due to Staphylococcus aureus              |
| 33 | 93597  | Q311200 | Aspiration of blood in newborn                              |
| 34 | 72704  | Qyu3000 | [X]Other respiratory distress of newborn                    |
| 35 |        |         |                                                             |
| 36 | 94759  | Q214000 | Liveborn with abnormal heart beat, unspecified              |
| 37 | 103401 | Q466111 | Intestinal obstruction in newborn due to faecoliths         |
| 38 | 104825 | Q453.00 | Other newborn transient coagulation defect                  |
| 39 |        |         |                                                             |
| 40 | 47317  | Q483z00 | Newborn feeding problem NOS                                 |
| 41 | 53402  | Q483z12 | Breast feeding problem in the newborn                       |
| 42 | 110294 | QyuA100 | [X]Other feeding problems of newborn                        |
| 43 | 73036  | 6337    | Triples -2 live+ 1 still born                               |
| 44 |        |         |                                                             |
| 45 | 59694  | Q411000 | Intraventric (nontraumatic) haemorrhage grade 1 fet newborn |
| 46 | 20005  | Q480.00 | Convulsions in newborn                                      |
| 47 | 26682  | Q404.00 | Omphalitis of the newborn                                   |
| 48 |        |         |                                                             |
| 49 | 37044  | Q450.11 | Vitamin K deficiency of the newborn                         |
| 50 | 25091  | Z23AP00 | Premature uterine contraction                               |
| 51 | 102737 | L112300 | Premature separation of placenta with coagulation defect    |
| 52 | 53829  | L281z00 | Premature rupture of membranes NOS                          |
| 53 |        |         |                                                             |
| 54 | 424    | L281.00 | Premature rupture of membranes                              |
| 55 | 108033 | Lyu3D00 | [X]Other premature separation of placenta                   |
| 56 | 69713  | L281000 | Premature rupture of membranes unspecified                  |
| 57 |        |         |                                                             |
| 58 | 59452  | L264000 | Intrauterine death unspecified                              |
| 59 | 4697   | Q10z.11 | Intrauterine growth retardation                             |
| 60 | 1413   | L264.00 | Intrauterine death                                          |

|    |        |         |                                                              |
|----|--------|---------|--------------------------------------------------------------|
| 1  |        |         |                                                              |
| 2  |        |         |                                                              |
| 3  | 89588  | 7E0A600 | Intrauterine insemination without superovulation donor sperm |
| 4  | 37831  | L264z00 | Intrauterine death NOS                                       |
| 5  | 111544 | 7E0A500 | Intrauterine insemination without superovulat partner sperm  |
| 6  | 48471  | PF6D200 | Intrauterine amputation of lower limb                        |
| 7  |        |         |                                                              |
| 8  | 91652  | 7E0A300 | Intrauterine insemination superovulation partner sperm       |
| 9  | 88271  | 7E0A400 | Intrauterine insemination superovulation using donor sperm   |
| 10 |        |         |                                                              |
| 11 | 36694  | Q21..11 | Intrauterine hypoxia                                         |
| 12 | 9542   | L265311 | Maternal care for intrauterine growth retardation            |
| 13 |        |         |                                                              |
| 14 | 57522  | Q451y11 | Neonatal thrombocytopenia due to platelet alloimmunisation   |
| 15 | 44062  | A984000 | Neonatal gonococcal conjunctivits                            |
| 16 | 41151  | Q406611 | Neonatal viral dacryocystitis or conjunctivitis              |
| 17 |        |         |                                                              |
| 18 | 45852  | Q406613 | Neonatal conjunctivitis due to virus                         |
| 19 | 18439  | 44qW.00 | Neonatal screening test                                      |
| 20 | 63783  | Q407y00 | Other specified neonatal candida infection                   |
| 21 | 71752  | Q457000 | Neonatal isoimmune neutropenia                               |
| 22 |        |         |                                                              |
| 23 | 30795  | Q492.00 | Neonatal hypertension                                        |
| 24 | 109861 | Q444100 | Other neonatal hypocalcaemia                                 |
| 25 | 53387  | 14I6.00 | H/O: neonatal abstinence syndrome                            |
| 26 |        |         |                                                              |
| 27 | 13297  | Q447.00 | Neonatal hypoglycaemia                                       |
| 28 | 110197 | Q44y.00 | Other transitory neonatal endocrine and metabolic problem    |
| 29 | 95112  | Q407511 | Neonatal monilial septicaemia                                |
| 30 | 31315  | Q41..11 | Neonatal haemorrhage                                         |
| 31 |        |         |                                                              |
| 32 | 11629  | 2FX..00 | O/E - Umbilical stump - neonatal                             |
| 33 | 99830  | Q446y00 | Other specified transitory neonatal electrolyte disturbance  |
| 34 | 52572  | Q406300 | Neonatal dacryocystitis or conjunctivitis due to E.Coli      |
| 35 |        |         |                                                              |
| 36 | 67105  | Q446300 | Transitory neonatal hyperkalaemia                            |
| 37 | 73994  | Q406400 | Neonatal dacryocystitis/conjunctivitis due to staphylococcus |
| 38 | 32722  | 9kJ..00 | Neonatal check - enhanced services administration            |
| 39 | 18991  | 313K.00 | Neonatal hearing test                                        |
| 40 |        |         |                                                              |
| 41 | 100646 | 67AD.00 | Neonatal feeding education                                   |
| 42 | 37782  | F251100 | Neonatal myoclonic epilepsy                                  |
| 43 | 70045  | Q45y.00 | Other specified transient neonatal blood disorder            |
| 44 |        |         |                                                              |
| 45 | 13302  | Q407.12 | Neonatal thrush                                              |
| 46 | 40123  | Q407.11 | Neonatal monilia                                             |
| 47 | 72350  | Q451y00 | Other specified transient neonatal thrombocytopenia          |
| 48 | 97518  | Q451z00 | Transient neonatal thrombocytopenia NOS                      |
| 49 |        |         |                                                              |
| 50 | 48202  | Q48A.00 | Neonatal cerebral leukomalacia                               |
| 51 | 29743  | Q407000 | Neonatal candidiasis of mouth                                |
| 52 | 29715  | Q406.00 | Neonatal dacryocystitis and conjunctivitis                   |
| 53 |        |         |                                                              |
| 54 | 55492  | Q447000 | Iatrogenic neonatal hypoglycaemia                            |
| 55 | 69813  | Q407z00 | Neonatal candida infection NOS                               |
| 56 | 8069   | Q433A00 | Neonatal jaundice from breast milk inhibitor                 |
| 57 | 3211   | Q433200 | Breast feeding inhibitors causing neonatal jaundice          |
| 58 | 7818   | Q31y500 | Neonatal snuffles                                            |
| 59 |        |         |                                                              |
| 60 | 26686  | Q485200 | Neonatal Abstinence Syndrome                                 |

|    |        |         |                                                             |
|----|--------|---------|-------------------------------------------------------------|
| 1  |        |         |                                                             |
| 2  |        |         |                                                             |
| 3  |        |         |                                                             |
| 4  | 17940  | F4F5400 | Neonatal nasolacrimal duct obstruction                      |
| 5  | 64472  | Q44V.00 | Neonatal goitre, not elsewhere classified                   |
| 6  | 32327  | Q406712 | Neonatal conjunctivitis due to chlamydiae                   |
| 7  | 94578  | Q457z00 | Transient neonatal neutropenia NOS                          |
| 8  | 46817  | Q446200 | Transitory neonatal hyponatraemia                           |
| 9  | 93307  | Q41y400 | Neonatal rectal haemorrhage                                 |
| 10 | 72370  | J004400 | Neonatal enamel hypoplasia                                  |
| 11 | 93210  | Q446z00 | Transitory neonatal electrolyte disturbance NOS             |
| 12 | 36127  | Q406412 | Neonatal conjunctivitis due to staphylococcus               |
| 13 | 26678  | Q406411 | Neonatal dacryocystitis due to staphylococcus               |
| 14 | 21472  | Q441.00 | Neonatal diabetes mellitus                                  |
| 15 | 48010  | Q443.00 | Neonatal thyrotoxicosis                                     |
| 16 | 39055  | 9kJ0.00 | Neonatal check - enhanced service completed                 |
| 17 | 15487  | Q407100 | Neonatal candidiasis of perineum                            |
| 18 | 28292  | Q405.00 | Neonatal infective mastitis                                 |
| 19 | 16482  | Q407.00 | Neonatal candida infection                                  |
| 20 | 2240   | Q4z..12 | Neonatal death                                              |
| 21 | 109658 | Qyu5300 | [X]Other neonatal gastrointestinal haemorrhage              |
| 22 | 53603  | Q48C.00 | Neonatal hypotension                                        |
| 23 | 17496  | Q31y511 | Neonatal sniffles                                           |
| 24 | 48638  | Q433800 | Neonatal jaundice with porphyria                            |
| 25 | 28341  | Q48y600 | Early neonatal death                                        |
| 26 | 44358  | Q44y000 | Transitory neonatal tyrosinaemia                            |
| 27 | 63759  | Q406y00 | Other specified neonatal dacryocystitis or conjunctivitis   |
| 28 | 23422  | Q406100 | Neonatal conjunctivitis                                     |
| 29 | 51913  | Q41y300 | Neonatal melaena                                            |
| 30 | 38485  | 7L13000 | Neonatal exchange blood transfusion                         |
| 31 | 35727  | Q407200 | Neonatal candidiasis of other skin                          |
| 32 | 49769  | ZV29000 | [V]Normal level of neonatal care                            |
| 33 | 45303  | Q433000 | Delayed conjugation causing neonatal jaundice, unspecified  |
| 34 | 55360  | Q433z00 | Delayed conjugation causing neonatal jaundice NOS           |
| 35 | 30742  | F13z500 | Benign neonatal sleep myoclonus                             |
| 36 | 21164  | Q48y411 | Neonatal 'craniotabes'                                      |
| 37 | 56614  | Q488.00 | Neonatal cerebral ischaemia                                 |
| 38 | 104194 | 2L...00 | Neonatal examination                                        |
| 39 | 38163  | Q46y100 | Neonatal diarrhoea                                          |
| 40 | 45444  | Q457.00 | Transient neonatal neutropenia                              |
| 41 | 36564  | Q48y700 | Late neonatal death                                         |
| 42 | 45012  | Q44U.00 | Transitory neonatal endocrine disorder, unspecified         |
| 43 | 49516  | Q414300 | Neonatal vaginal haemorrhage                                |
| 44 | 27845  | Q446000 | Neonatal dehydration                                        |
| 45 | 93156  | Q433y11 | Neonatal jaundice - deficiency enzyme for bilirubin conjug. |
| 46 | 65686  | Q444.12 | Neonatal hypoparathyroidism                                 |
| 47 | 72347  | Q406800 | Neonatal dacryocystitis/conjunctivitis-other inclusion body |
| 48 | 72494  | Q406812 | Neonatal conjunctivitis due to other inclusion body         |
| 49 |        |         |                                                             |
| 50 |        |         |                                                             |
| 51 |        |         |                                                             |
| 52 |        |         |                                                             |
| 53 |        |         |                                                             |
| 54 |        |         |                                                             |
| 55 |        |         |                                                             |
| 56 |        |         |                                                             |
| 57 |        |         |                                                             |
| 58 |        |         |                                                             |
| 59 |        |         |                                                             |
| 60 |        |         |                                                             |

|    |        |                                                                      |
|----|--------|----------------------------------------------------------------------|
| 1  |        |                                                                      |
| 2  |        |                                                                      |
| 3  |        |                                                                      |
| 4  | 43576  | Q406811 Neonatal dacryocystitis due to other inclusion body          |
| 5  | 27962  | Q311400 Neonatal aspiration of milk and regurgitated food            |
| 6  | 24792  | Q31y611 Neonatal apnoeic attack                                      |
| 7  | 106500 | Q44A.00 Neonatal hypoparathyroidism                                  |
| 8  |        |                                                                      |
| 9  | 27793  | Q406700 Neonatal dacryocystitis or conjunctivitis due to chlamydiae  |
| 10 | 35507  | Q433.00 Other neonatal jaundice - delayed conjugation other cause    |
| 11 | 58833  | Q433700 Neonatal jaundice with congenital hypothyroidism             |
| 12 | 47909  | Q449.00 Neonatal tetany without calcium or magnesium deficiency      |
| 13 |        |                                                                      |
| 14 | 71056  | Q433y00 Delayed conjugation causing neonatal jaundice OS             |
| 15 | 37776  | Q446100 Transitory neonatal hypernatraemia                           |
| 16 | 91557  | Q406z00 Neonatal dacryocystitis or conjunctivitis NOS                |
| 17 |        |                                                                      |
| 18 | 23566  | Q490.00 Neonatal cardiac failure                                     |
| 19 | 35477  | Qyu5A00 [X]Neonatal jaundice from other+unspcf hepatocellular damage |
| 20 | 28361  | Q436100 Transient neonatal hyperbilirubinaemia                       |
| 21 | 48869  | Qyu5900 [X]Neonatal jaundice due/other specifd excessive haemolysis  |
| 22 |        |                                                                      |
| 23 | 64999  | Q406200 Neonatal dacryocystitis                                      |
| 24 | 55634  | Q442.00 Neonatal myasthenia gravis                                   |
| 25 | 18578  | Q47y200 Neonatal skin infection                                      |
| 26 |        |                                                                      |
| 27 | 20894  | Q444.00 Neonatal hypocalcaemia                                       |
| 28 | 37953  | Q444z00 Neonatal hypocalcaemia NOS                                   |
| 29 | 55689  | Q407500 Neonatal candida septicaemia                                 |
| 30 |        |                                                                      |
| 31 | 104225 | Q434100 Giant cell hepatitis causing neonatal jaundice               |
| 32 | 39574  | Q406512 Neonatal conjunctivitis due to other bacteria                |
| 33 | 37045  | Q406511 Neonatal dacryocystitis due to other bacteria                |
| 34 | 68264  | Q406600 Neonatal dacryocystitis or conjunctivitis due to virus       |
| 35 |        |                                                                      |
| 36 | 54971  | Q446.00 Other transitory neonatal electrolyte disturbance            |
| 37 | 66985  | Q433600 Neonatal jaundice with Gilbert's syndrome                    |
| 38 | 39164  | Q430000 Neonatal jaundice + glucose-6-phosphate dehydrogenase defic. |
| 39 | 99435  | N000500 Neonatal lupus erythematosus                                 |
| 40 |        |                                                                      |
| 41 | 6097   | Q40y100 Neonatal urinary tract infection                             |
| 42 | 40869  | Qyu5B00 [X]Neonatal jaundice from other specified causes             |
| 43 | 57203  | Q445.00 Neonatal hypomagnesaemia                                     |
| 44 |        |                                                                      |
| 45 | 106854 | Q451100 Trans neonatal thrombocyto due to idopath matern thrombocyto |
| 46 | 54169  | Q491.00 Neonatal cardiac dysrhythmia                                 |
| 47 | 105058 | Qyu3300 [X]Other neonatal aspiration syndromes                       |
| 48 | 109912 | Qyu6200 [X]Other neonatal hypocalcaemia                              |
| 49 |        |                                                                      |
| 50 | 49462  | Q41y200 Neonatal haematemesis                                        |
| 51 | 110458 | Q32..00 Neonatal respiratory distress syndrome                       |
| 52 | 13301  | Q478.00 Neonatal erythema toxicum                                    |
| 53 |        |                                                                      |
| 54 | 94612  | Q433500 Neonatal jaundice with Dubin-Johnson syndrome                |
| 55 | 7475   | ZV29212 [V]Neonatal care on NNU                                      |
| 56 | 47540  | ZV29211 [V]Neonatal care on ITU                                      |
| 57 |        |                                                                      |
| 58 | 68708  | Q406311 Neonatal dacryocystitis due to E.Coli                        |
| 59 | 89700  | Q406312 Neonatal conjunctivitis due to E.coli                        |
| 60 | 71441  | Q451.00 Transient neonatal thrombocytopenia                          |

|    |        |         |                                                              |
|----|--------|---------|--------------------------------------------------------------|
| 1  |        |         |                                                              |
| 2  |        |         |                                                              |
| 3  |        |         |                                                              |
| 4  | 63790  | Q46y000 | Neonatal peritonitis NOS                                     |
| 5  | 72975  | Qyu6000 | [X]Other neonatal hypoglycaemia                              |
| 6  | 96590  | 67AD.11 | Neonatal feeding advice                                      |
| 7  | 90526  | Q444011 | Neonatal cows' milk hypocalcaemia                            |
| 8  | 71986  | Q446400 | Transitory neonatal hypokalaemia                             |
| 9  | 71532  | Q406500 | Neonatal dacryocystitis/conjunctivitis due to other bacteria |
| 10 | 6883   | Q317000 | Perinatal bronchopulmonary dysplasia                         |
| 11 | 94812  | Qyu3A00 | [X]Oth cardiovascular disorders originating/perinatal period |
| 12 | 54248  | Q415.00 | Perinatal adrenal haemorrhage                                |
| 13 | 21461  | Q4...00 | Other perinatal conditions                                   |
| 14 | 45002  | Q412.00 | Perinatal subarachnoid haemorrhage                           |
| 15 | 87844  | 7F2A000 | Obstetric umbilical artery Doppler                           |
| 16 | 41899  | L240000 | Congenital abnormality of uterus affecting obstetric care    |
| 17 | 25731  | Z27..00 | Obstetric investigative observation                          |
| 18 | 101334 | 8HQ2000 | Referral for obstetric ultrasound scan                       |
| 19 | 32913  | Z28..00 | Obstetric pelvic observation                                 |
| 20 | 34677  | 7F23000 | Immed repair obstetric laceration of uterus or cervix uteri  |
| 21 | 58517  | L244012 | Rectocele affecting obstetric care                           |
| 22 | 29087  | 7F25z00 | Obstetric monitoring NOS                                     |
| 23 | 35601  | 7F23z00 | Immediate repair of obstetric laceration NOS                 |
| 24 | 13700  | ZL5D100 | Referral to obstetrician                                     |
| 25 | 13317  | Z7...00 | Obstetric examination                                        |
| 26 | 110628 | L43y.11 | Fat embolism - obstetric                                     |
| 27 | 34046  | 7F2..00 | Other obstetric operations                                   |
| 28 | 60507  | L35z000 | Obstetric trauma NOS, unspecified                            |
| 29 | 56727  | 5392    | Obstetric X-ray - placenta                                   |
| 30 | 59623  | L35..00 | Other obstetric trauma                                       |
| 31 | 52679  | L417.00 | Obstetric cerebral venous thrombosis                         |
| 32 | 13039  | L383.00 | Obstetric toxic reaction to local anaesthesia                |
| 33 | 20907  | L244011 | Cystocele affecting obstetric care                           |
| 34 | 72298  | L355.00 | Other obstetric pelvic organ damage                          |
| 35 | 102027 | L35yz00 | Other obstetric trauma NOS                                   |
| 36 | 34210  | L240011 | Bicornuate uterus affecting obstetric care                   |
| 37 | 85951  | 7F28z00 | Other non routine obstetric scan NOS                         |
| 38 | 34086  | 7Fz..00 | Obstetric operations NOS                                     |
| 39 | 67257  | L35y.00 | Other obstetric trauma OS                                    |
| 40 | 39036  | 7F...00 | Obstetric operations                                         |
| 41 | 11268  | 7F23.12 | Immediate suture of obstetric laceration                     |
| 42 | 59059  | L433.12 | Septic obstetric embolism                                    |
| 43 | 14970  | 7F23100 | Immed repair obstetric laceration perineum & anal sphincter  |
| 44 | 68557  | L353000 | Obstetric laceration of cervix unspecified                   |
| 45 | 73797  | L353z00 | Obstetric laceration of cervix NOS                           |
| 46 | 101752 | L391000 | Obstetric shock unspecified                                  |
| 47 | 85244  | 7F2B.00 | Obstetric ultrasound monitoring                              |
| 48 | 95698  | 7F28y00 | Other specified other non routine obstetric scan             |
| 49 |        |         |                                                              |
| 50 |        |         |                                                              |
| 51 |        |         |                                                              |
| 52 |        |         |                                                              |
| 53 |        |         |                                                              |
| 54 |        |         |                                                              |
| 55 |        |         |                                                              |
| 56 |        |         |                                                              |
| 57 |        |         |                                                              |
| 58 |        |         |                                                              |
| 59 |        |         |                                                              |
| 60 |        |         |                                                              |

|    |        |         |                                                              |
|----|--------|---------|--------------------------------------------------------------|
| 1  |        |         |                                                              |
| 2  |        |         |                                                              |
| 3  |        |         |                                                              |
| 4  | 54473  | L244000 | Other uterine/pelvic floor abnormal affecting obstetric care |
| 5  | 85245  | 7F26z00 | Routine obstetric scan NOS                                   |
| 6  | 55573  | 8HJ7.00 | Obstetric self-referral                                      |
| 7  | 88229  | 7F2A.00 | Obstetric Doppler studies                                    |
| 8  | 78449  | 7F28.00 | Other non routine obstetric scan                             |
| 9  | 68966  | Lyu7.00 | [X]Other obstetric conditions, not elsewhere classified      |
| 10 | 105817 | 9381    | Obstetric coop card issued                                   |
| 11 | 93136  | L241000 | Tumour of uterine body affecting obstetric care              |
| 12 | 86011  | 7F26.00 | Routine obstetric scan                                       |
| 13 | 35558  | 584..12 | U-S scan - obstetric, diagn.                                 |
| 14 | 55750  | L353.00 | Obstetric laceration of cervix                               |
| 15 | 65231  | 9384    | Obstetric coop card updated                                  |
| 16 | 106154 | 7F2Ay00 | Other specified obstetric Doppler studies                    |
| 17 | 109880 | 7F2Az11 | Obstetric doppler ultrasound NOS                             |
| 18 | 48200  | 8HMN.00 | Listed for Obstetric admission                               |
| 19 | 51929  | L354.11 | High vaginal laceration - obstetric                          |
| 20 | 34843  | L352.11 | Inversion of uterus - obstetric                              |
| 21 | 44286  | ZL1C200 | Under care of obstetrician                                   |
| 22 | 4797   | 5842    | U-S obstetric scan normal                                    |
| 23 | 49661  | 7Fy..00 | Other specified obstetric operations                         |
| 24 | 47156  | L357.00 | Obstetric trauma causing pelvic haematoma                    |
| 25 | 26698  | 27Z..00 | Obstetric examination NOS                                    |
| 26 | 104979 | L354z00 | Obstetric high vaginal laceration NOS                        |
| 27 | 94444  | L352z00 | Obstetric inversion of uterus NOS                            |
| 28 | 2382   | 584Z.00 | U-S obstetric diagn. scan NOS                                |
| 29 | 71742  | L354000 | Obstetric high vaginal laceration unspecified                |
| 30 | 20826  | L241011 | Uterine fibroid affecting obstetric care                     |
| 31 | 13318  | 271..11 | O/E - fundus size - obstetric                                |
| 32 | 94059  | 7F2Az00 | Obstetric Doppler studies NOS                                |
| 33 | 28730  | L355.11 | Bladder injury - obstetric                                   |
| 34 | 27916  | L353.12 | Tear of cervix - obstetric                                   |
| 35 | 86021  | 7F24.00 | Other obstetric operations                                   |
| 36 | 22929  | 8H3C.00 | Non-urgent obstetric admission                               |
| 37 | 105146 | 7F2Ay11 | Other specified obstetric doppler ultrasound                 |
| 38 | 69458  | L354.00 | Obstetric high vaginal laceration                            |
| 39 | 33352  | L352.00 | Obstetric inversion of uterus                                |
| 40 | 23800  | 7F23.11 | Immediate repair of obstetric tear                           |
| 41 | 29685  | 5843    | U-S obstetric scan abnormal                                  |
| 42 | 70607  | 7F23300 | Immediate repair of minor obstetric laceration               |
| 43 | 24655  | 8H27.00 | Admit obstetric emergency                                    |
| 44 | 106067 | L246000 | Other cervical abnormality affecting obstetric care          |
| 45 | 53094  | 7F25y00 | Other specified obstetric monitoring                         |
| 46 | 98057  | L248000 | Vulval abnormality affecting obstetric care                  |
| 47 | 36959  | L391.00 | Obstetric shock                                              |
| 48 | 17911  | L416.11 | Piles - obstetric                                            |
| 49 |        |         |                                                              |
| 50 |        |         |                                                              |
| 51 |        |         |                                                              |
| 52 |        |         |                                                              |
| 53 |        |         |                                                              |
| 54 |        |         |                                                              |
| 55 |        |         |                                                              |
| 56 |        |         |                                                              |
| 57 |        |         |                                                              |
| 58 |        |         |                                                              |
| 59 |        |         |                                                              |
| 60 |        |         |                                                              |

|    |        |         |                                                            |
|----|--------|---------|------------------------------------------------------------|
| 1  |        |         |                                                            |
| 2  |        |         |                                                            |
| 3  | 19800  | 584..00 | Ultrasound in obstetric diagn.                             |
| 4  | 62012  | 7F2z.00 | Other obstetric operations NOS                             |
| 5  | 60870  | 938Z.00 | Obstetric coop card NOS                                    |
| 6  | 20591  | 539..00 | Abdominal obstetric X-ray                                  |
| 7  | 23169  | 539Z.00 | Abdominal obstetric X-ray NOS                              |
| 8  | 98639  | L43zz00 | Obstetric pulmonary embolism NOS                           |
| 9  | 101944 | L43z000 | Obstetric pulmonary embolism NOS, unspecified              |
| 10 | 34533  | 8HV6.00 | Private referral to obstetrician                           |
| 11 | 35197  | 8HLN.00 | Obstetric D.V. done                                        |
| 12 | 104205 | 7F2A100 | Obstetric uterine artery Doppler                           |
| 13 | 102802 | 7F2By00 | Other specified obstetric ultrasound monitoring            |
| 14 | 12625  | 7F25.00 | Obstetric monitoring                                       |
| 15 | 57891  | 7F23.00 | Immediate repair of obstetric laceration                   |
| 16 | 54582  | L35zz00 | Obstetric trauma NOS                                       |
| 17 | 13965  | 584..13 | Ultra-sound scan - obstetric                               |
| 18 | 96343  | 7F26y00 | Other specified routine obstetric scan                     |
| 19 | 100451 | 7F24100 | Obstetric uterine tamponade                                |
| 20 | 27019  | 5841    | U-S obstetric scan requested                               |
| 21 | 87848  | 7F2Bz00 | Obstetric ultrasound monitoring NOS                        |
| 22 | 91278  | L357000 | Obstetric pelvic haematoma unspecified                     |
| 23 | 36340  | 938..00 | Obstetric coop card                                        |
| 24 | 19327  | L411.11 | Perineal obstetric varicose veins                          |
| 25 | 20496  | L411.12 | Vulval obstetric varicose veins                            |
| 26 | 27650  | L384.00 | Obstetric spinal and epidural anaesthesia-induced headache |
| 27 | 107037 | Lyu4C00 | [X]Other specified obstetric trauma                        |
| 28 | 43628  | L247011 | Septate vagina affecting obstetric care                    |
| 29 | 11988  | 8H57.00 | Obstetric referral                                         |
| 30 | 11204  | 271..12 | O/E - uterus size - obstetric                              |
| 31 | 48311  | Z261.00 | Observation of gestational sac                             |
| 32 | 43004  | Q13..00 | Light for gestational age                                  |
| 33 | 22385  | Z22C300 | Length of gestation                                        |
| 34 | 91915  | 7M0f400 | From 9 weeks to <14 weeks gestational age                  |
| 35 | 50704  | Q113.00 | Light for gestational age                                  |
| 36 | 69250  | L169000 | Herpes gestationis unspecified                             |
| 37 | 59681  | L41z511 | Gestational phlebitis NOS                                  |
| 38 | 34265  | L16C000 | Gestational proteinuria                                    |
| 39 | 60330  | L19..00 | Complications specific to multiple gestation               |
| 40 | 34505  | 62X3.00 | Full term gestation - 40 weeks                             |
| 41 | 90884  | 7M0f200 | 9 - 13 weeks gestational age                               |
| 42 | 29565  | L161.13 | Gestational oedema                                         |
| 43 | 102435 | 8CE0000 | Gestational diabetes information leaflet given             |
| 44 | 34484  | 62X1.00 | Gestation = 24 weeks                                       |
| 45 | 49663  | Z261100 | Gestational sac present                                    |
| 46 | 7515   | L169.00 | Herpes gestationis                                         |
| 47 | 37201  | L16C100 | Gestational oedema with proteinuria                        |
| 48 |        |         |                                                            |
| 49 |        |         |                                                            |
| 50 |        |         |                                                            |
| 51 |        |         |                                                            |
| 52 |        |         |                                                            |
| 53 |        |         |                                                            |
| 54 |        |         |                                                            |
| 55 |        |         |                                                            |
| 56 |        |         |                                                            |
| 57 |        |         |                                                            |
| 58 |        |         |                                                            |
| 59 |        |         |                                                            |
| 60 |        |         |                                                            |

|        |         |                                              |
|--------|---------|----------------------------------------------|
| 50081  | L41z512 | Gestational phlebopathy NOS                  |
| 58971  | L41z513 | Gestational thrombosis NOS                   |
| 16975  | L21..11 | Gestation - multiple                         |
| 97682  | 7M0fy00 | Other specified gestational age              |
| 95702  | 7M0f300 | Under 9 weeks gestational age                |
| 108013 | ZC2CB00 | Dietary advice for gestational diabetes      |
| 26556  | 62X2.00 | Gestation >24 weeks                          |
| 26555  | 62X0.00 | Gestation <24 weeks                          |
| 111075 | Qyu1200 | [X]Other 'heavy for gestational age' infants |
| 86327  | 7M0f000 | Over 20 weeks gestational age                |
| 91101  | 7M0fz00 | Gestational age NOS                          |
| 103954 | 62X5.00 | Length of gestation at time of test          |
| 2664   | L180900 | Gestational diabetes mellitus                |
| 95703  | 7M0f100 | 14 - 20 weeks gestational age                |
| 8446   | L180811 | Gestational diabetes mellitus                |
| 40703  | L169z00 | Herpes gestationis NOS                       |
| 43805  | Z22C312 | Duration of gestation                        |
| 18810  | 62X..00 | Length of gestation                          |
| 103090 | Lyu3000 | [X]Other multiple gestation                  |
| 55352  | 7M0f.00 | Gestational age                              |
| 21526  | L123500 | Gestational hypertension                     |

| colour | condition             | time frame          |
|--------|-----------------------|---------------------|
| green  | pregnancy             | 7/12 mths           |
| blue   | birth                 | <21 days postpartum |
| yellow | abortion/ miscarriage | <5 days             |

#### Appendix 4: Additional CPRD browser pregnancy medcodes

| Medcode | Readcode | Readterm                                                     |
|---------|----------|--------------------------------------------------------------|
| 6298    | ZV28.00  | [V]Antenatal screening                                       |
| 94405   | L413100  | Antenatal deep vein thrombosis - delivered                   |
| 99188   | L173.00  | Maternal tuberculosis in pregnancy/childbirth/puerperium     |
| 63781   | L410z00  | Varicose veins of legs in pregnancy and puerperium NOS       |
| 45870   | Ly...00  | Complications of pregnancy,childbirth or the puerperium OS   |
| 52106   | L412z00  | Superficial thrombophlebitis in pregnancy and puerperium NOS |
| 86991   | L172000  | Other maternal venereal disease, unspec pregnancy/puerperium |
| 4243    | L466.00  | Galactorrhoea in pregnancy and the puerperium                |
| 70092   | L460.00  | Retracted nipple in pregnancy, the puerperium or lactation   |



|    |        |         |                                                              |
|----|--------|---------|--------------------------------------------------------------|
| 1  |        |         |                                                              |
| 2  |        |         |                                                              |
| 3  |        |         |                                                              |
| 4  | 16995  | L462.00 | Breast engorgement in pregnancy, the puerperium or lactation |
| 5  | 59573  | L176500 | Viral hepatitis comp pregnancy, childbirth & the puerperium  |
| 6  | 88361  | L248.11 | Persistent hymen in pregnancy, childbirth and the puerperium |
| 7  | 31610  | L248.13 | Vulval abnormality in pregnancy/childbirth/puerperium        |
| 8  | 92998  | Lyu1.00 | [X]Oedema,proteinuria+hypertens in pregnancy,childbrth,puerp |
| 9  | 20597  | 12G4.00 | FH: Multiple pregnancy                                       |
| 10 | 28446  | Lz...00 | Complications of pregnancy,childbirth and the puerperium NOS |
| 11 | 63835  | L247z11 | Septate vagina in pregnancy/childbirth/puerperium NOS        |
| 12 | 109550 | L416400 | Haemorrhoids in pregnancy and puerperium with p/n comp       |
| 13 | 59276  | L032.00 | Ovarian pregnancy                                            |
| 14 | 65579  | L415.00 | Other phlebitis and thrombosis in pregnancy and puerperium   |
| 15 | 93143  | L121.00 | Renal hypertension in pregnancy/childbirth/puerperium        |
| 16 | 60154  | L24..00 | Pelvic soft tissue abnormality in pregnancy/childbirth/puerp |
| 17 | 71717  | L121100 | Renal hypertension in pregnancy/childbirth/puerp - delivered |
| 18 | 24006  | L466100 | Galactorrhoea in pregnancy and the puerperium - delivered    |
| 19 | 44069  | L18..00 | Other medical condition in pregnancy/childbirth/puerperium   |
| 20 | 47918  | L090300 | Salpingitis following abortive pregnancy                     |
| 21 | 11152  | L...00  | Complications of pregnancy, childbirth and the puerperium    |
| 22 | 63644  | L181z00 | Thyroid dysfunction in pregnancy/childbirth/puerperium NOS   |
| 23 | 96004  | L183z00 | Drug dependence during pregnancy/childbirth/puerperium NOS   |
| 24 | 1771   | L182.00 | Anaemia during pregnancy, childbirth and the puerperium      |
| 25 | 46744  | L41..00 | Venous complications of pregnancy and the puerperium         |
| 26 | 90329  | L416z00 | Haemorrhoids in pregnancy and the puerperium NOS             |
| 27 | 41050  | Z2...00 | Pregnancy, childbirth and puerperium observations            |
| 28 | 39550  | L244z11 | Cystocele in pregnancy, childbirth or the puerperium NOS     |
| 29 | 64147  | L244z12 | Rectocele in pregnancy, childbirth or the puerperium NOS     |
| 30 | 15297  | L461400 | Cracked nipple in pregnancy/puerperium/lactation + p/n comp  |
| 31 | 73717  | L463300 | Other breast disorder in pregnancy/puerperium/lact +a/n comp |
| 32 | 98264  | L165200 | Asymptomatic bacteriuria in pregnancy - del with p/n comp    |
| 33 | 53310  | L1z..00 | Complications of pregnancy/childbirth/puerperium NOS         |
| 34 | 103144 | L416300 | Haemorrhoids in pregnancy and puerperium with a/n comp       |
| 35 | 46756  | L184.00 | Mental disorders in pregnancy, childbirth and the puerperium |
| 36 | 26023  | L411300 | VV's of perineum/vulva in pregnancy/puerperium + a/n comp    |
| 37 | 58140  | L173000 | Maternal tuberculosis,unspec whether in pregnancy/puerperium |
| 38 | 73089  | L460000 | Retracted nipple in pregnancy/puerperium/lactation unspec    |
| 39 | 67006  | L096400 | Pulmonary embolism following abortive pregnancy              |
| 40 | 65085  | L092000 | Bladder damage following abortive pregnancy                  |
| 41 | 23840  | L090z00 | Septicaemia NOS following abortive pregnancy                 |
| 42 | 51359  | L090200 | Pelvic peritonitis following abortive pregnancy              |
| 43 | 106097 | L09y.00 | Other specified complication following abortive pregnancy    |
| 44 | 12604  | L120.00 | Benign essential hypertension in pregnancy/childbirth/puerp  |
| 45 |        |         |                                                              |
| 46 |        |         |                                                              |
| 47 |        |         |                                                              |
| 48 |        |         |                                                              |
| 49 |        |         |                                                              |
| 50 |        |         |                                                              |
| 51 |        |         |                                                              |
| 52 |        |         |                                                              |
| 53 |        |         |                                                              |
| 54 |        |         |                                                              |
| 55 |        |         |                                                              |
| 56 |        |         |                                                              |
| 57 |        |         |                                                              |
| 58 |        |         |                                                              |
| 59 |        |         |                                                              |
| 60 |        |         |                                                              |

|    |        |         |                                                              |
|----|--------|---------|--------------------------------------------------------------|
| 1  |        |         |                                                              |
| 2  |        |         |                                                              |
| 3  |        |         |                                                              |
| 4  | 103683 | 8Hki.00 | Referral to teenage pregnancy and parenting support service  |
| 5  | 42091  | L411z00 | Varicose veins of perineum/vulva in pregnancy/puerperium NOS |
| 6  | 96437  | L170000 | Maternal syphilis, unspec whether in pregnancy or puerperium |
| 7  | 20850  | L244.11 | Cystocele in pregnancy, childbirth and the puerperium        |
| 8  | 35903  | L244.12 | Pendulous abdomen in pregnancy,childbirth and the puerperium |
| 9  | 39492  | L244.13 | Rectocele in pregnancy, childbirth and the puerperium        |
| 10 | 71943  | L411000 | VV's of perineum/vulva in pregnancy/puerperium unspecified   |
| 11 | 93583  | L096.00 | Embolism following abortive pregnancy                        |
| 12 | 34182  | 1547    | H/O: medical termination of pregnancy                        |
| 13 | 70422  | L093400 | Uraemia following abortive pregnancy                         |
| 14 | 103222 | L248z11 | Persistent hymen in pregnancy/childbirth/puerperium NOS      |
| 15 | 97296  | L461200 | Cracked nipple in pregnancy/puerp/lact - deliv + p/n comp    |
| 16 | 5541   | 1544    | H/O: ectopic pregnancy                                       |
| 17 | 58982  | L186.00 | Other cardiovascular diseases in pregnancy/childbirth/puerp  |
| 18 | 62886  | L461z00 | Cracked nipple in pregnancy, the puerperium or lactation NOS |
| 19 | 41473  | L183.00 | Drug dependence in pregnancy, childbirth and the puerperium  |
| 20 | 48552  | L010.11 | Anembryonic pregnancy                                        |
| 21 | 33634  | L182z00 | Anaemia during pregnancy/childbirth/puerperium NOS           |
| 22 | 64384  | L180z00 | Diabetes mellitus in pregnancy/childbirth/puerperium NOS     |
| 23 | 25759  | L411.00 | VV's of perineum/vulva in pregnancy/puerperium               |
| 24 | 38556  | 67A7.00 | Pregnancy dental advice                                      |
| 25 | 41718  | L1y..00 | Complications of pregnancy/childbirth/puerperium OS          |
| 26 | 53056  | L246.11 | Polyp of cervix in pregnancy, childbirth and the puerperium  |
| 27 | 73557  | L188z00 | Abnormal GTT in pregnancy/childbirth/puerperium NOS          |
| 28 | 69012  | L466300 | Galactorrhoea in pregnancy/puerperium with a/n complication  |
| 29 | 57131  | L462100 | Breast engorgement in pregnancy/puerperium/lactation - deliv |
| 30 | 64260  | L18D.00 | Dis nervous syst complic pregnancy,childbirth and puerperium |
| 31 | 59493  | L090400 | Salpingo-oophoritis following abortive pregnancy             |
| 32 | 104656 | Ly2..00 | Sequelae of complication pregnancy childbirth and puerperium |
| 33 | 16046  | L410.00 | Varicose veins of legs in pregnancy and the puerperium       |
| 34 | 72215  | L241z00 | Uterine body tumour in pregnancy/childbirth/puerperium NOS   |
| 35 | 13245  | 12G2.00 | FH: Diabetes in pregnancy                                    |
| 36 | 106736 | 9mK1.00 | Pertussis vaccination in pregnancy invitation second letter  |
| 37 | 66537  | L170100 | Maternal syphilis during pregnancy - baby delivered          |
| 38 | 92415  | L095.00 | Shock following abortive pregnancy                           |
| 39 | 35273  | L097.00 | Readmission for abortive pregnancy (NHS codes)               |
| 40 | 20152  | L090y00 | Sepsis NOS following abortion/ectopic/molar pregnancy        |
| 41 | 50009  | L461100 | Cracked nipple in pregnancy/puerperium/lactation - delivered |
| 42 | 71162  | L16y100 | Other pregnancy complication - delivered                     |
| 43 | 102635 | 8Cg..00 | Pregnancy termination care                                   |
| 44 | 104806 | L463100 | Other breast disorder in pregnancy/puerperium/lact - deliv   |
| 45 |        |         |                                                              |
| 46 |        |         |                                                              |
| 47 |        |         |                                                              |
| 48 |        |         |                                                              |
| 49 |        |         |                                                              |
| 50 |        |         |                                                              |
| 51 |        |         |                                                              |
| 52 |        |         |                                                              |
| 53 |        |         |                                                              |
| 54 |        |         |                                                              |
| 55 |        |         |                                                              |
| 56 |        |         |                                                              |
| 57 |        |         |                                                              |
| 58 |        |         |                                                              |
| 59 |        |         |                                                              |
| 60 |        |         |                                                              |

|    |        |         |                                                              |
|----|--------|---------|--------------------------------------------------------------|
| 1  |        |         |                                                              |
| 2  |        |         |                                                              |
| 3  |        |         |                                                              |
| 4  | 63319  | L096.11 | Embolus following abortive pregnancy                         |
| 5  | 94527  | L16y400 | Other pregnancy complication with postnatal complication     |
| 6  | 9170   | L12..00 | Hypertension complicating pregnancy/childbirth/puerperium    |
| 7  | 73432  | L18z100 | Medical condition NOS during pregnancy - baby delivered      |
| 8  | 104466 | L179.00 | HIV disease complicating pregnancy childbirth puerperium     |
| 9  | 47197  | L410400 | Varicose veins of legs in pregnancy/puerperium + p/n comp    |
| 10 | 54761  | L170.00 | Maternal syphilis in pregnancy/childbirth/puerperium         |
| 11 | 63773  | L416100 | Haemorrhoids in pregnancy and the puerperium - delivered     |
| 12 | 101499 | L246z12 | Stenosis of cervix in pregnancy/childbirth/puerperium NOS    |
| 13 | 33255  | L246z11 | Polyp of cervix in pregnancy/childbirth/puerperium NOS       |
| 14 | 56542  | L240z11 | Bicornuate uterus in pregnancy, childbirth or puerperium NOS |
| 15 | 41016  | L247.11 | Septate vagina in pregnancy, childbirth and the puerperium   |
| 16 | 40262  | L247.13 | Vaginal abnormality in pregnancy/childbirth/puerperium       |
| 17 | 6478   | L188.00 | Abnormal glucose tolerance test in pregnancy/childb/puerp    |
| 18 | 59910  | L17z.00 | Maternal infect/parasitic dis NOS in pregnancy/childb/puerp  |
| 19 | 62052  | L092500 | Uterus damage following abortive pregnancy                   |
| 20 | 97836  | L242100 | Uterine operation scar in pregnancy/childbirth/puerp - deliv |
| 21 | 99889  | L16A200 | Glycosuria during pregnancy - delivered with p/n comp        |
| 22 | 98981  | L166400 | Genitourinary tract infection in pregnancy with p/n comp     |
| 23 | 59601  | L462200 | Breast engorgement in pregnancy/puerp/lact - del + p/n comp  |
| 24 | 16017  | L166100 | Genitourinary tract infection in pregnancy - delivered       |
| 25 | 10205  | ZG9..00 | Advice relating to pregnancy and fertility                   |
| 26 | 105500 | L41yz00 | Other venous complication of pregnancy and puerperium NOS    |
| 27 | 41283  | L187.00 | Orthopaedic disorders in pregnancy/childbirth/puerperium     |
| 28 | 63379  | L183100 | Drug dependence during pregnancy - baby delivered            |
| 29 | 38871  | L246.00 | Other cervical abnormality in pregnancy/childbirth/puerp     |
| 30 | 47686  | L181.00 | Thyroid dysfunction in pregnancy/childbirth/puerperium       |
| 31 | 23691  | L172.00 | Other venereal diseases in pregnancy/childbirth/puerperium   |
| 32 | 107197 | L170z00 | Maternal syphilis in pregnancy/childbirth/puerperium NOS     |
| 33 | 68215  | L188100 | Abnormal GTT during pregnancy - baby delivered               |
| 34 | 40723  | L12z.00 | Unspecified hypertension in pregnancy/childbirth/puerperium  |
| 35 | 104542 | 67AH.00 | Education about toxoplasmosis precautions during pregnancy   |
| 36 | 97741  | L461000 | Cracked nipple in pregnancy/puerperium/lactation unspecified |
| 37 | 67035  | L123200 | Transient hypertension of pregnancy - deliv with p/n comp    |
| 38 | 64125  | L09yz00 | Other specified complication NOS follow abortive pregnancy   |
| 39 | 57640  | L242z00 | Uterine operation scar in pregnancy/childbirth/puerp NOS     |
| 40 | 2924   | 7E06600 | Hysterotomy and termination of pregnancy                     |
| 41 | 27952  | ZV13900 | [V]PH comp of pregnancy, childbirth and the puerperium       |
| 42 | 53141  | L241.00 | Tumour of uterine body in pregnancy/childbirth/puerperium    |
| 43 | 35928  | L463000 | Other breast disorder in pregnancy/puerperium/lact unspec    |
| 44 | 40121  | 12G1.00 | FH: Raised B.P. in pregnancy                                 |
| 45 |        |         |                                                              |
| 46 |        |         |                                                              |
| 47 |        |         |                                                              |
| 48 |        |         |                                                              |
| 49 |        |         |                                                              |
| 50 |        |         |                                                              |
| 51 |        |         |                                                              |
| 52 |        |         |                                                              |
| 53 |        |         |                                                              |
| 54 |        |         |                                                              |
| 55 |        |         |                                                              |
| 56 |        |         |                                                              |
| 57 |        |         |                                                              |
| 58 |        |         |                                                              |
| 59 |        |         |                                                              |
| 60 |        |         |                                                              |

|    |        |         |                                                              |
|----|--------|---------|--------------------------------------------------------------|
| 1  |        |         |                                                              |
| 2  |        |         |                                                              |
| 3  |        |         |                                                              |
| 4  | 11359  | L180.00 | Diabetes mellitus during pregnancy/childbirth/puerperium     |
| 5  | 33708  | L182100 | Anaemia during pregnancy - baby delivered                    |
| 6  | 58686  | L462000 | Breast engorgement in pregnancy/puerperium/lactation unspec  |
| 7  | 6560   | L416.00 | Haemorrhoids in pregnancy and the puerperium                 |
| 8  | 98133  | 9Ea0.00 | Risk life pregnant woman greater than if pregnancy terminatd |
| 9  | 32950  | L03y100 | Cornual pregnancy                                            |
| 10 | 105006 | Q48G.00 | Complication termination pregnancy affecting fetus newborn   |
| 11 | 107708 | L415100 | Other phlebitis/thrombosis in pregnancy/puerperium - deliv   |
| 12 | 28225  | L240.11 | Bicornuate uterus in pregnancy, childbirth and puerperium    |
| 13 | 49789  | L240.12 | Double uterus in pregnancy, childbirth and the puerperium    |
| 14 | 56217  | L416000 | Haemorrhoids in pregnancy and the puerperium unspecified     |
| 15 | 99154  | L410000 | Varicose veins of legs in pregnancy/puerperium unspecified   |
| 16 | 96724  | L162100 | Unspecified renal disease in pregnancy - delivered           |
| 17 | 101260 | L10z100 | Early pregnancy haemorrhage NOS - delivered                  |
| 18 | 35859  | 67A5.00 | Pregnancy alcohol advice                                     |
| 19 | 42598  | L175.00 | Maternal rubella in pregnancy, childbirth and the puerperium |
| 20 | 72437  | L248z00 | Vulval abnormality in pregnancy/childbirth/puerperium NOS    |
| 21 | 101272 | L462300 | Breast engorgement in pregnancy/puerperium/lact + a/n comp   |
| 22 | 92362  | L240z00 | Congenital abnormality uterus in pregnancy/childb/puerp NOS  |
| 23 | 63362  | L091100 | Defibrination syndrome following abortive pregnancy          |
| 24 | 73311  | L41z.00 | Venous complications of pregnancy and puerperium NOS         |
| 25 | 34639  | L180100 | Diabetes mellitus during pregnancy - baby delivered          |
| 26 | 43754  | L18z.00 | Medical condition NOS in pregnancy/childbirth/puerperium     |
| 27 | 30948  | L150100 | Post-term pregnancy - delivered                              |
| 28 | 73647  | L188000 | Abnormal GTT - unspec whether during pregnancy/puerperium    |
| 29 | 54681  | L189.00 | Dis resp syst comp pregnancy, childbirth & puerperium        |
| 30 | 99365  | L460z00 | Retracted nipple in pregnancy/puerperium/lactation NOS       |
| 31 | 64649  | L175100 | Maternal rubella during pregnancy - baby delivered           |
| 32 | 28611  | L461.00 | Cracked nipple in pregnancy, the puerperium or lactation     |
| 33 | 61144  | L463.00 | Other breast disorder in pregnancy/puerperium/lactation      |
| 34 | 50571  | L090100 | Parametritis following abortive pregnancy                    |
| 35 | 70342  | L123400 | Transient hypertension of pregnancy + postnatal complication |
| 36 | 99422  | L187000 | Orthopaedic disorder - unsp whether in pregnancy/puerperium  |
| 37 | 32007  | L090.00 | Genital or pelvic infection following abortive pregnancy     |
| 38 | 45242  | L241.11 | Uterine fibroids in pregnancy, childbirth and the puerperium |
| 39 | 7270   | 12G4.11 | FH: Twin pregnancy                                           |
| 40 | 38440  | L462z00 | Breast engorgement in pregnancy/puerperium/lactation NOS     |
| 41 | 89557  | L092300 | Cervix damage following abortive pregnancy                   |
| 42 | 41961  | L171.00 | Maternal gonorrhoea during pregnancy/childbirth/puerperium   |
| 43 | 50908  | L242.00 | Uterine scar from previous surgery in pregnancy/childb/puerp |
| 44 | 16752  | ZV72900 | [V]Pregnancy examination and test                            |
| 45 |        |         |                                                              |
| 46 |        |         |                                                              |
| 47 |        |         |                                                              |
| 48 |        |         |                                                              |
| 49 |        |         |                                                              |
| 50 |        |         |                                                              |
| 51 |        |         |                                                              |
| 52 |        |         |                                                              |
| 53 |        |         |                                                              |
| 54 |        |         |                                                              |
| 55 |        |         |                                                              |
| 56 |        |         |                                                              |
| 57 |        |         |                                                              |
| 58 |        |         |                                                              |
| 59 |        |         |                                                              |
| 60 |        |         |                                                              |

|        |         |                                                              |
|--------|---------|--------------------------------------------------------------|
| 14765  | L462400 | Breast engorgement in pregnancy/puerperium/lact + p/n comp   |
| 15633  | L182000 | Anaemia - unspecified whether in pregnancy or the puerperium |
| 73757  | L247z00 | Vaginal abnormality in pregnancy/childbirth/puerperium NOS   |
| 99389  | L460300 | Retracted nipple in pregnancy/puerperium/lact with a/n comp  |
| 24303  | 9Ea..00 | Reason for termination of pregnancy                          |
| 55757  | L16y200 | Other pregnancy complication - delivered with postnatal comp |
| 67635  | L180000 | Diabetes mellitus - unspec whether in pregnancy/puerperium   |
| 51639  | L241z11 | Uterine fibroid in pregnancy/childbirth/puerperium NOS       |
| 40978  | Z22A700 | Surrogate pregnancy                                          |
| 18944  | 7E07011 | Dilation cervix uteri & curettage for termination pregnancy  |
| 54107  | L10z000 | Early pregnancy haemorrhage NOS unspecified                  |
| 103610 | 9NkN.00 | Seen in early pregnancy unit                                 |
| 70476  | L132100 | Late pregnancy vomiting - delivered                          |
| 23456  | L412.00 | Superficial thrombophlebitis in pregnancy and the puerperium |
| 67377  | L463z00 | Other breast disorder in pregnancy/puerperium/lactation NOS  |
| 94736  | L096600 | Septic embolism following abortive pregnancy                 |
| 94353  | L175000 | Maternal rubella, unspecified whether pregnancy/puerperium   |
| 64127  | L121000 | Renal hypertension in pregnancy/childbirth/puerp unspecified |
| 99594  | L415000 | Other phlebitis/thrombosis in pregnancy/puerperium unsp      |
| 50093  | L093000 | Oliguria following abortive pregnancy                        |
| 28312  | L466z00 | Galactorrhoea in pregnancy and the puerperium NOS            |
| 72944  | L176.00 | Other maternal viral dis. in pregnancy/childbirth/puerperium |
| 49390  | L174.00 | Maternal malaria in pregnancy, childbirth and the puerperium |
| 97629  | L246z00 | Other cervical abnormality in pregnancy/childbirth/puerp NOS |
| 57419  | L167100 | Liver disorder in pregnancy - delivered                      |
| 73927  | L175z00 | Maternal rubella in pregnancy/childbirth/puerperium NOS      |
| 54089  | L466000 | Galactorrhoea in pregnancy and the puerperium unspecified    |
| 94718  | L121z00 | Renal hypertension in pregnancy/childbirth/puerperium NOS    |
| 105918 | L09y400 | Urinary tract infection following abortive pregnancy         |
| 30326  | L090000 | Endometritis following abortive pregnancy                    |
| 38022  | Z22CF00 | Date symptom of pregnancy first noted                        |
| 69703  | L185100 | Congenital cardiovasc dis in pregnancy - baby delivered      |
| 69911  | L18zz00 | Medical condition NOS in pregnancy/childb/puerp NOS          |
| 35680  | Q423.00 | Hydrops fetalis due to isoimmunisation                       |
| 59296  | L140000 | Threatened premature labour unspecified                      |

# BMJ Open

## Trends in HIV testing in the UK Primary Care setting: A 15 year retrospective cohort study 2000 to 2015

|                                 |                                                                                                                                                                                                                                                                                                                                                                                                                                                                                                                                                                                                                                                                                                                                                                                                                                                                                                                                                                                   |
|---------------------------------|-----------------------------------------------------------------------------------------------------------------------------------------------------------------------------------------------------------------------------------------------------------------------------------------------------------------------------------------------------------------------------------------------------------------------------------------------------------------------------------------------------------------------------------------------------------------------------------------------------------------------------------------------------------------------------------------------------------------------------------------------------------------------------------------------------------------------------------------------------------------------------------------------------------------------------------------------------------------------------------|
| Journal:                        | <i>BMJ Open</i>                                                                                                                                                                                                                                                                                                                                                                                                                                                                                                                                                                                                                                                                                                                                                                                                                                                                                                                                                                   |
| Manuscript ID                   | bmjopen-2018-027744.R3                                                                                                                                                                                                                                                                                                                                                                                                                                                                                                                                                                                                                                                                                                                                                                                                                                                                                                                                                            |
| Article Type:                   | Research                                                                                                                                                                                                                                                                                                                                                                                                                                                                                                                                                                                                                                                                                                                                                                                                                                                                                                                                                                          |
| Date Submitted by the Author:   | 28-Aug-2019                                                                                                                                                                                                                                                                                                                                                                                                                                                                                                                                                                                                                                                                                                                                                                                                                                                                                                                                                                       |
| Complete List of Authors:       | Gompels, Mark; North Bristol NHS Trust, Department of Immunology, Southmead Hospital<br>Michael, Skevi; University of Bristol, School of Mathematics<br>Davies, Charlotte; University of Bristol, Department of Population Health Sciences, Bristol Medical School<br>Jones, Tim; University of Bristol; University Hospitals Bristol NHS Foundation Trust, The National Institute for Health Research Collaboration for Leadership in Applied Health Research and Care West (NIHR CLAHRC West)<br>Macleod, John; University of Bristol, Population Health Sciences, Bristol Medical School; University of Bristol, The National Institute of Health Research Health Protection Research Unit (NIHR HPRU) in Evaluation of Interventions<br>May, Margaret; University of Bristol, Population Health Sciences, Bristol Medical School; University of Bristol, The National Institute of Health Research Health Protection Research Unit (NIHR HPRU) in Evaluation of Interventions |
| <b>Primary Subject Heading</b>: | General practice / Family practice                                                                                                                                                                                                                                                                                                                                                                                                                                                                                                                                                                                                                                                                                                                                                                                                                                                                                                                                                |
| Secondary Subject Heading:      | HIV/AIDS, Infectious diseases, Public health, Sexual health                                                                                                                                                                                                                                                                                                                                                                                                                                                                                                                                                                                                                                                                                                                                                                                                                                                                                                                       |
| Keywords:                       | PRIMARY CARE, HIV & AIDS < INFECTIOUS DISEASES, HIV testing, CPRD                                                                                                                                                                                                                                                                                                                                                                                                                                                                                                                                                                                                                                                                                                                                                                                                                                                                                                                 |
|                                 |                                                                                                                                                                                                                                                                                                                                                                                                                                                                                                                                                                                                                                                                                                                                                                                                                                                                                                                                                                                   |

SCHOLARONE™  
Manuscripts

1  
2  
3  
4  
5 **Trends in HIV testing in the UK Primary Care setting: A 15 year retrospective cohort study 2000 to**  
6 **2015**  
7

8 M Gompels<sup>1</sup>, S Michael<sup>2</sup>, C F Davies<sup>3</sup>, T Jones<sup>3,4</sup>, John MacLeod<sup>3,5</sup>, M T May<sup>3,5</sup>  
9

10 Version:14/05/2019  
11

12 <sup>1</sup> Dr Mark Gompels: Consultant HIV, Department of Immunology, Southmead Hospital, North Bristol  
13 NHS Trust, UK. Email: [Mark.Gompels@nbt.nhs.uk](mailto:Mark.Gompels@nbt.nhs.uk)  
14

15 <sup>2</sup> Dr Skevi Michael: Senior Teaching Associate, School of Mathematics, University of Bristol, UK.  
16 Email: [Skevi.Michael@bristol.ac.uk](mailto:Skevi.Michael@bristol.ac.uk)  
17

18 <sup>3</sup> Dr Charlotte F Davies: Senior Research Associate, Department of Population Health Sciences,  
19 Bristol Medical School, University of Bristol, UK. Email: [Charlotte.Davies@bristol.ac.uk](mailto:Charlotte.Davies@bristol.ac.uk)  
20

21 <sup>3,4</sup> Dr Timothy Jones: Senior Research Associate, Department of Population Health Sciences, Bristol  
22 Medical School, University of Bristol, UK and The National Institute for Health Research  
23 Collaboration for Leadership in Applied Health Research and Care West (NIHR CLAHRC West) at  
24 University Hospitals Bristol NHS Foundation Trust, Bristol, UK. Email: [Timothy.Jones@bristol.ac.uk](mailto:Timothy.Jones@bristol.ac.uk)  
25

26 <sup>3,5</sup> Professor John Macleod, Professor of Clinical Epidemiology and Primary Care, Department of  
27 Population Health Sciences, Bristol Medical School, University of Bristol, UK and The National  
28 Institute of Health Research Health Protection Research Unit (NIHR HPRU) in Evaluation of  
29 Interventions at University of Bristol, Bristol, UK. Email: [John.Macleod@bristol.ac.uk](mailto:John.Macleod@bristol.ac.uk)  
30

31 <sup>3,5</sup> Professor Margaret T May, Professor of Medical Statistics, Department of Population Health  
32 Sciences, Bristol Medical School, University of Bristol, UK and The National Institute of Health  
33 Research Health Protection Research Unit (NIHR HPRU) in Evaluation of Interventions at University  
34 of Bristol, Bristol, UK. Email: [Margaret.may@bristol.ac.uk](mailto:Margaret.may@bristol.ac.uk)  
35  
36  
37  
38  
39  
40  
41  
42  
43

44 **Corresponding author:**  
45  
46  
47  
48

49 Dr. Charlotte F. Davies  
50 Department of Population Health Sciences  
51 Bristol Medical School  
52 University of Bristol  
53 Bristol  
54 BS8 2PS  
55 UK Telephone: +44 117 9287209  
56  
57 Fax: +44 117 928 7325  
58  
59 [charlotte.davies@bristol.ac.uk](mailto:charlotte.davies@bristol.ac.uk)  
60

1  
2  
3 Word Count: abstract 300, words 4656, 4 tables, 2 figures, 50 references, 1 supplementary figure, 2  
4 supplementary tables, 1 web supplementary file (appendices 1-4)  
5  
6  
7  
8  
9  
10  
11  
12  
13  
14  
15  
16  
17  
18  
19  
20  
21  
22  
23  
24  
25  
26  
27  
28  
29  
30  
31  
32  
33  
34  
35  
36  
37  
38  
39  
40  
41  
42  
43  
44  
45  
46  
47  
48  
49  
50  
51  
52  
53  
54  
55  
56  
57  
58  
59  
60

For peer review only



**Abstract 300**

**Objectives:** To estimate trends in HIV testing, positivity and prevalence in UK Primary Care for 2000-2015 as part of a wider investigation into reasons for late diagnosis of HIV.

**Design:** Retrospective cohort study using the Clinical Practice Research Datalink (CPRD) which is derived from computerised clinical records produced during consultations in Primary Care.

**Setting:** 404 General Practices in England.

**Participants:** 5,979,598 adults aged  $\geq 16$  years registered between 2000-2015 with 45,093,761 person years of observation.

**Outcomes:** Annual HIV testing rates, proportion of positive tests, and prevalence of HIV-infected people recorded in Primary Care 2000-2015.

**Results:** HIV testing in Primary Care increased from 2000 to 2010, but then declined. Testing was higher in females than males and in those aged 16-44 years compared with older adults. Rates per 100,000 in women aged 16-44 years were 177 (95% CI 167-188); 1309 (1282-1336); 1789 (1757-1821) and 839 (817-862) in 2000, 2005, 2010 and 2015, respectively, and for non-pregnant women: 22.5 (19-26); 134 (125-143); 262 (250-275); 190 (179, 201). For men aged 16-44 years rates were: 26 (22-29); 107 (100-115); 196 (185-206); 137 (127-146). Over the study period, there were approximately 2 positive results per 1000 HIV tests. Men were eight-fold more likely to test positive than women. The percentage of HIV diagnoses among adults recorded in CPRD may be as low as 55% in London and 67% in the rest of the UK.

**Conclusions:** HIV testing rates in Primary Care peaked in 2010 and subsequently declined. Access to testing was higher for women despite the prevalence of HIV being higher in men.

**Implications and further research needed:**

Opportunities remain in Primary Care for increasing HIV testing to prevent costly late diagnoses and decrease HIV transmission. Interventions to improve targeting of tests and increase adherence to HIV testing guidelines are needed in Primary Care.

## Article summary

### Strengths and limitations of this study

- We investigated trends in HIV testing in Primary Care using high quality data from the Clinical Practice Research Datalink (CPRD) which is derived from computerised clinical records produced during consultations in Primary Care in England.
- CPRD provided anonymised Primary Care records on patients registered between 2000 and 2015 in 404 primary care practices in England which is likely to be representative of the general patient population.
- A limitation of the study is that not all General Practices contribute data to CPRD and therefore we cannot know whether the sample was representative.
- A major strength of the study was the large number of patients, nearly 6 million, which allowed us to contrast trends in HIV testing rates in Primary Care by sex, age, deprivation, rural/urban location and whether in London or not.
- Data were available for 15 years of follow up allowing us to show that HIV testing in Primary Care in England increased between 2000 and 2010, but then declined up to 2015.

## Introduction

HIV testing in Primary Care is an important component of the strategy to diagnose HIV earlier and reduce transmission of HIV. In 2015 there were an estimated 89,800 (95% credible interval (CrI) 87,100-94,800) people living with HIV (PLWHIV) in England of whom approximately 15% (CrI 12-19%) were unaware of their infection<sup>1</sup>. Of those individuals newly diagnosed with HIV in 2015, 39% were diagnosed late, defined as having a CD4 count below 350 cells/mL within three months of diagnosis.<sup>2</sup> An estimated 1 in 4 of newly diagnosed individuals experienced a missed opportunity for an earlier diagnosis within the healthcare system in the preceding year.<sup>3</sup> Late diagnosis of HIV is associated with increased hospitalisations, decreased life expectancy,<sup>4-7</sup> and higher treatment and care costs to the NHS.<sup>8</sup> Importantly, individuals with undiagnosed HIV are likely to be responsible for the majority of transmissions because successfully treated individuals are unlikely to infect others.<sup>9</sup> Enhanced HIV testing is considered to be cost-effective in areas with a local diagnosed HIV prevalence that exceeds 2 per 1000 in adults aged 15-59 years.<sup>2,10</sup> In these high HIV prevalence areas recommendations are an HIV test should be routinely offered to all new GP registrations, those undergoing tests for other sexually transmitted infections or having blood tests for any reason, and all new hospital medical admissions.<sup>2,11</sup> However, the majority of people with HIV seek medical care for a related condition several times prior to their HIV diagnosis.<sup>12,13</sup> This may be presenting to general practice or hospital care. But without a high degree of clinical suspicion, the diagnosis is often missed.<sup>14</sup> BHIVA has published a list of indicator diseases which are more commonly found in those who are HIV positive than negative.<sup>15</sup> HIV testing is recommended in these cases, but recent surveys suggest poor adherence to guidelines.<sup>16,17</sup> Given the increase in HIV prevalence over time we would expect that there would be an increase in GP testing for HIV.

Evidence from systematic reviews shows that there are often many barriers to testing experienced by patients and equally by the healthcare providers (HCP).<sup>18-20</sup> Patients presenting with clinical indicator conditions to their General Practitioner (GP) provide a valuable opportunity to diagnose HIV and avoid hospitalisations due to late diagnosis.<sup>21</sup> Research has shown that the majority of patients (up to 75%) newly diagnosed with HIV had been seen in the healthcare system within the 12 months prior to their diagnosis resulting in a missed opportunity to test.<sup>12,14,22</sup> <sup>23</sup>Opt out HIV testing has been shown to be feasible, acceptable and cost effective in eight pilot studies conducted in community, primary and secondary care settings in high prevalence areas across England <sup>24</sup>.

1  
2  
3 However, no recent evidence is available to know if HIV testing in Primary Care has been increasing  
4 and guidelines have been implemented over the country and not just in high risk areas.<sup>16,17</sup>  
5  
6  
7

8 HIV testing in Primary Care has been reported only for the years 1995 to 2005 using data from the  
9 UK General Practice Research Database (GPRD).<sup>25</sup> This study showed that testing in Primary Care  
10 remained low, but increased steadily. Our main objective was to analyse data from the same source  
11 collected between the years 2000 to 2015 to study if HIV testing trends continued to increase in  
12 primary care over this extended time period. In addition we investigated differences in HIV testing  
13 rates and HIV diagnosis by demographic characteristics and estimated the prevalence of HIV  
14 recorded in primary care and compared it with estimates from national surveillance.  
15  
16  
17  
18  
19  
20

## 21 **Methods**

### 22 ***Population and data***

23 We used data from the Clinical Practice Research Datalink (CPRD), previously known as the General  
24 Practice Research Database (GPRD), which is derived from computerised clinical records produced  
25 during consultations in Primary Care. The CPRD database contains information from GP practices in  
26 the UK using the Vision software system (roughly 9% of UK practices) who consent to data collection;  
27 the sample is broadly representative of the adult UK population<sup>26</sup>. Only GP practices in England are  
28 eligible for linkage to other datasets such as hospital admissions and practices can opt out of linkage.  
29 CPRD provided anonymised Primary Care records and linked secondary care and mortality records  
30 on patients registered between 2000 and 2015 in 404 primary care practices in England. Data were  
31 available on nearly 6 million people aged over 16 years old. General Practitioners (GP) enter data on  
32 tests, diagnoses and symptoms using Read codes which are a hierarchical alphanumeric system  
33 similar to, but more extensive than International Classification of Disease (ICD) codes. The list of  
34 Read codes used to identify (1) HIV tests<sup>25</sup> (2) HIV diagnoses<sup>25</sup> (3) pregnancy/delivery/abortion<sup>27</sup>  
35 and (4) additional CPRD browser pregnancy medcodes are listed as appendices 1 to 4, respectively,  
36 in the supplementary file. We used individual level quintiles of the Index of Multiple Deprivation,  
37 2015<sup>28</sup>. Practices were classified as rural, urban conurbation, or city/town at lower super output  
38 level (a small area geographic boundary of around 1,500 people) in England based on Office for  
39 National Statistics classifications, 2011<sup>29</sup>, and as within or outside London. Ethnicity was grouped as  
40 Asian, Black African, Black Caribbean, Other, White, and unknown based on linked Hospital Episode  
41 Statistics data.  
42  
43  
44  
45  
46  
47  
48  
49  
50  
51  
52  
53  
54  
55

56 We used national surveillance data from Public Health England (PHE) on testing in Primary Care  
57 derived from general practices that submit HIV tests to laboratories participating in the Sentinel  
58  
59  
60

1  
2  
3 Surveillance of Blood Borne Virus Testing (SSBBV). These practices cover 35% of England's Primary  
4 Care population. HIV testing data is captured from 66% of the Primary Care population in extremely  
5 high prevalence areas (>5 /1000), 37% within high prevalence areas (>2/1000) and 29% within low  
6 prevalence areas. These data exclude any point of care tests (POCTs) carried out by GPs, and tests  
7 carried out as part of antenatal screening. The latest data available on testing rates and positivity  
8 were for 2015<sup>30</sup>. Data on HIV prevalence were derived from the HIV and AIDS Reporting System  
9 (HARS) and for earlier years the Survey of Prevalent HIV Infections Diagnosed (SOPHID) available  
10 from PHE.<sup>2</sup> These data were available up to 2015.  
11  
12  
13  
14  
15  
16  
17

### 18 **Patient and Public Involvement**

19  
20 Public and Patients were not involved in the design of this study. Patient data from General Practices  
21 were contributed via CPRD and PHE surveillance as stated above.  
22  
23  
24  
25

### 26 **Statistical methods**

#### 27 *HIV testing rate, positivity and prevalence of HIV recorded in primary care*

28  
29 Using data from CPRD we estimated the HIV testing rates for each year between 2000-2015, overall  
30 and by patient demographics. Testing rates were estimated for males and females, for all ages and  
31 grouped by age (16-44, ≥ 45 years - chosen to match the study by Evans et al<sup>25</sup>). We also estimated  
32 rates separately according to whether the practice was in London or not, and by type of location. For  
33 each calendar year, the denominator used to calculate the HIV testing rate was the number of patients  
34 who were in the CPRD cohort in that year satisfying the following inclusion criteria:  
35  
36  
37  
38

- 39 (i) they were registered before the 30<sup>th</sup> June of that year
  - 40 (ii) they did not transfer to another practice or die before the 30<sup>th</sup> June of that year
  - 41 (iii) they were in the same practice for at least six months
  - 42 (iv) they had not previously tested positive for HIV.
- 43  
44  
45

46 The numerator was the number of HIV tests carried out within the relevant year. For each patient in  
47 the denominator, the number of tests was calculated, disregarding repeat tests that were within a 3  
48 month period. Any test done or registered more than 90 days after the first recorded positive test was  
49 ignored.  
50  
51

52 As the majority of HIV tests in women are carried out as part of antenatal screening, analyses for  
53 females were repeated excluding these tests. We identified women who were pregnant using either  
54 delivery dates or Read codes as follows:  
55  
56

- 57 (i) Delivery (birth) dates associated with the females in our data: An HIV test was considered ante-  
58 natal if it occurred between 3-9 months before the recorded delivery date.  
59  
60

- 1  
2  
3 (ii) Read codes indicating any sign of pregnancy (antenatal): In this case an HIV test was considered  
4 antenatal if it occurred within 6 months from the day the Read code was recorded.  
5  
6 (iii) Read codes associated with the postpartum period: In this case the HIV test was considered  
7 antenatal if it occurred within 3-10 months before the corresponding record.  
8  
9 (iv) Read codes indicating any sign of miscarriage or abortion: An HIV test was recorded as ante-natal  
10 if it occurred between 3 months prior to 3 months after the corresponding record.  
11  
12

13 The Read codes associated with pregnancy are listed in the supplementary material. The antenatal  
14 HIV tests were excluded from the numerator and the corresponding patients were removed from the  
15 denominator for the related period as well.  
16  
17

18 We plotted the trends in HIV testing rates per 100,000 person years for 2000-2015 separately for men  
19 and women (including and excluding ante-natal HIV tests) for all adults and restricted to those aged  
20 16-44 years old. In addition, we calculated the annual proportion of HIV tests that were positive for  
21 each year to investigate whether testing improved in terms of targeting higher risk individuals during  
22 the later years.  
23  
24  
25

26 For the years 2005, 2010 and 2015, we estimated and tabulated HIV testing rates and incidence rate  
27 ratios (IRR) with 95% confidence intervals from Poisson models for males and females separately  
28 according to whether practice was in London or not, by age, ethnicity, IMD, and by type of location.  
29  
30

31 To validate our estimates of HIV testing rates recorded in CPRD, we compared them with those from  
32 national surveillance data collected by PHE for 2015<sup>30</sup>. Finally, we estimated the prevalence of  
33 diagnosed HIV recorded in CPRD and compared this with estimated prevalence from national  
34 surveillance data collected by PHE using SOPHID and HARS to determine the proportion of all HIV  
35 diagnoses that were recorded in CPRD . Data analysis was performed using STATA version 14.  
36  
37  
38  
39  
40

## 41 RESULTS

42  
43 Data were available on 5,979,598 distinct patients with 45,093,761 (males 22,155,768; females  
44 22,937,630) person years of observation. The demographic characteristics of included individuals are  
45 shown in Table 1. There were less males (48%) than females (52%). Practices (15%) and individuals  
46 (16%) in the most deprived quintile of IMD were under-represented in CPRD. The total number of  
47 HIV tests recorded in CPRD between 2000 and 2015 was 159,115 of which 357 (0.2%) were positive.  
48  
49  
50  
51

### 52 *Trends in HIV testing rates 2000-2015 in Primary Care*

53  
54 Figure 1 shows the trend in HIV testing rates per 100,000 person years for the period 2000-2015 by  
55 gender and age group, with and without inclusion of antenatal testing. The main reason for HIV testing  
56 among women of child-bearing age was antenatal screening: the testing rates (per 100,000 person-  
57  
58  
59  
60

1  
2  
3 years) in all women aged 16-44 increased from 177 (95% CI 167-188) in 2000 to 1789 (1757-1821) in  
4  
5 2010 and then decreased to 839 (817, 862) in 2015, with the corresponding figures being 23 (19-26),  
6  
7 262 (250-275) and 190 (179-201) when antenatal testing was excluded. For males the corresponding  
8  
9 rates were 26 (22-29), 196 (185-206) and 137 (127-146), which are lower than rates for females even  
10  
11 when antenatal tests are excluded. HIV testing rates in Primary Care peaked in females in 2010 (figure  
12  
13 1) and have declined markedly since then. In men and women not tested ante-natally, HIV testing  
14  
15 rates increased until 2012-2013, but have declined since. Similar patterns were seen when data were  
16  
17 restricted to those aged 16-44 years only, except that rates were much higher in younger adults  
18  
19 compared with those aged 45 years and over (supplementary table 1 all adults, supplementary table  
20  
21 2 for those aged 16-44 years).

### 22 *Trends in positive HIV diagnosis in Primary Care*

23 Although the number of HIV tests was much higher in women, more men tested positive:  
24  
25 196/20,328 (0.96%) men compared with 161/138,787 (0.12%) women. This was skewed by a very  
26  
27 low rate of positive diagnoses in younger females who were screened ante-natally. The smoothed  
28  
29 trend in the percentage of tests that were positive for men and women of different ages is shown in  
30  
31 figure 2 (plot of raw data is shown in supplementary\_figure). Percentage positive (excluding ante-  
32  
33 natal tests), was similar in men and women before 2005, but declined more sharply in women  
34  
35 thereafter. The percentage of tests that were positive peaked around 2003 and have fallen sharply  
36  
37 since 2010, indicating that there is no evidence of better targeting of testing to individuals in later  
38  
39 years.

### 40 *HIV testing rates in practices within and outside London, by age and deprivation index*

41 HIV testing rates were two-fold higher in London compared with outside London for both men and  
42  
43 women in 2005 and this differential increased in 2010 and 2015. Table 2 and table 3 give the testing  
44  
45 rates for years 2005, 2010 and 2015 for males and females (excluding antenatal tests), respectively,  
46  
47 stratified by whether the practices were in London or outside London. Data for all years between 2000  
48  
49 and 2015 are given for all adults (supplementary table 1) and for adults aged 16-44 years  
50  
51 (supplementary table 2). In more recent years practices outside London but in conurbations had  
52  
53 higher rates than those in cities or towns, which in turn had higher rates than rural practices. Although  
54  
55 testing rates in men in London practices decreased between 2010 and 2015 overall from 273 (251-  
56  
57 295) to 246 (225-266) per 100,000 person-years, there was evidence of a shift in targeting of testing  
58  
59 since rates increased in older men from 151 (127-176) to 180 (154-206) per 100,000 person-years and  
60  
in the most deprived quintile from 415 (351-480) to 565 (487-643) per 100,000 person-years. This

1  
2  
3 targeting effect was also seen among women in London practices, but not in practices outside London.  
4  
5 However, in 2015 in London it remained the case that older people were less likely to be tested:  
6  
7 incidence rate ratio (IRR) for age  $\geq 45$  compared with 16-44 years was 0.59 (0.50-0.71) for men and  
8  
9 0.46 (0.38-0.55) in women. The corresponding IRR for outside London were much lower: IRR for age  $\geq$   
10  
11 45 compared with 16-44 years was 0.37 (0.32-0.43) in men and 0.18 (0.16-0.21) in women. In contrast,  
12  
13 by 2015 the most deprived group were 2- or 3-fold more likely to be tested than the least deprived,  
14  
15 depending on gender and locality, with IRR for IMD quintile 5 versus 1 increasing markedly from 2005  
16  
17 through to 2015 (table 2 (males) and table 3 (females)).

#### 18 *HIV testing rates and positivity according to national surveillance data*

19  
20 For comparison, national surveillance data for 2015 estimated that General Practices in extremely  
21  
22 high prevalence areas (defined as greater than 5/1000 population, comparable with "London" in our  
23  
24 CPRD study) carried out the highest number of tests per practice population 860 per 100 000 person  
25  
26 years. This was nearly double the coverage rate of General Practices in high diagnosed prevalence  
27  
28 areas (defined as greater than 2/1000 population), which was estimated at 440 per 100 000 person  
29  
30 years, and ten times the coverage rate among General Practices in low diagnosed prevalence areas,  
31  
32 which was estimated at 90 per 100 000 person years. The estimates of HIV testing rates from  
33  
34 surveillance were higher than our estimates from CPRD (table 2 and table 3). The proportion of  
35  
36 positive tests among those tested in Primary Care estimated from SSBBV surveillance data was 0.4%  
37  
38 in 2015<sup>30</sup>. This varied from 0.5% in very high prevalence areas to 0.2% in low prevalence areas and  
39  
40 was consistent with our estimated positivity (figure 2).

#### 41 *Prevalence of recorded HIV in CPRD and comparison with national surveillance estimates*

42  
43 In 2015 the prevalence of diagnosed HIV recorded in CPRD was 2.8 per 1000 adult patients in  
44  
45 London practices and 0.8 per 1000 in the rest of the UK (table 4). According to PHE surveillance, in  
46  
47 2015 HIV prevalence in UK was estimated to be 1.6 per 1000, and excluding undiagnosed HIV was  
48  
49 1.3 per 1000 population.<sup>2</sup> The HIV prevalence in London was estimated to be 4.7 per 1000,  
50  
51 substantially higher than the rest of the UK at 1.1 per 1000. The corresponding observed prevalence,  
52  
53 that is, excluding undiagnosed cases of HIV, was 4.2 and 0.9 per 1000 population in London and the  
54  
55 rest of the UK, respectively.<sup>2</sup> However, these percentages are likely to be over-estimated as children  
56  
57 aged <16 years were not included in the CPRD calculations of prevalence but were included in PHE  
58  
59 data. In General Practices in London, prevalence of HIV recorded in CPRD was higher for males, older  
60  
61 individuals, Black African ethnicity and most deprived quintile (table 4) with a similar pattern in  
62  
63 practices outside London except that prevalence did not vary by age.



## Discussion

### *Statement of principal findings*

Our analysis of CPRD data on GP consultations recorded on approximately 6 million people living in the UK over a 15-year period, shows that the initial rise in HIV testing seen in Primary Care between 2000 and 2010 reversed with a significant drop in the testing rates for HIV in primary care from 2010. This is an unexpected finding as throughout this period prevalence of HIV has been increasing which should have engendered higher rates of testing in Primary Care, given the NICE recommendations on testing, which would increase with increased prevalence<sup>31,32</sup>. HIV testing rates in Primary Care were higher in women than men throughout the study period, even when tests for antenatal screening were excluded, despite HIV prevalence being higher in men. This resulted in men being eight-fold more likely to test positive than women in this setting. Over the 15-year period of the study, there were approximately 2 positive results per 1000 HIV tests. We did not find evidence of better targeting of HIV testing to individuals in more recent years as the percentage of tests that were positive peaked around 2003. Many individuals at high risk of HIV infection may choose to test in settings other than General Practice, such as sexual health clinics, which might make it harder to target HIV testing among the population attending Primary Care.

The pattern of HIV testing has also changed over time. Testing was two-fold higher in London than elsewhere and has increased in the groups and areas of high deprivation within London. This is reassuring as it also reflects the higher prevalence of HIV in these areas and indicates that HIV testing has become more geographically targeted. Overall, testing rates were higher in urban conurbations and cities than in rural areas reflecting the national prevalence figures<sup>2</sup>. Younger people were more likely to be tested than those aged 45 years and over, which reflects the incidence pattern for HIV. However, our data shows an increasing trend in the rate of testing among the older age group in London, but not elsewhere, which may have been driven by the recognition that among those with HIV infection the proportion diagnosed late is higher in older age groups<sup>33</sup>.

In 2015, the prevalence of HIV recorded in CPRD was over three-fold higher in London than elsewhere, but overall was substantially lower than the prevalence of diagnosed HIV estimated from PHE surveillance<sup>2</sup>. This may be due to HIV-positive individuals not using primary care or to non-disclosure of their HIV status to their GP, not recording of the diagnosis on GP systems, or to CPRD not including sufficient practices with high HIV prevalence. CPRD is broadly representative of Primary Care in the UK, but the UK HIV epidemic is concentrated in cities with approximately half of

1  
2  
3 HIV-positive individuals living in London<sup>2</sup>. The estimated percentage of HIV diagnoses among adults  
4 that were recorded in CPRD increased between 2005 and 2015 but was still substantially lower in  
5 London than elsewhere. This trend may reflect the ageing HIV population's greater requirement of  
6 primary care services, decrease in stigma of disclosure, or better transfer and recording in Primary  
7 Care of positive results of HIV tests carried out in other settings in later years.  
8  
9

### 10 11 12 *Strengths and weaknesses of the study*

13  
14 This study is very large with data from nearly six million patients followed over fifteen years with  
15 detailed primary care records. This detailed coverage enabled us to accurately measure HIV testing  
16 rates according to the important factors of deprivation, urbanisation, gender, ethnicity and age.  
17 Records were collected prospectively and electronically over a significant time period; therefore, we  
18 were able to show clearly the trends that have occurred. Our analysis and the data collection may be  
19 biased by several factors. The CPRD only includes a sample of general practices, but this is broadly  
20 representative of Primary Care in the UK, and, given the large numbers, this is a sufficient sample  
21 size for estimates of testing rates to be accurate. We have shown the CPRD slightly underrepresents  
22 deprivation, in both individuals and GP practices. Whilst this may be the case, given the very large  
23 sample size, we think that we can still draw valuable conclusions from this data. This study can only  
24 show the composite rates of testing in Primary Care. We were not able to categorise the different  
25 indications for an HIV test. What is clear, given the number of HIV positive patients, is that many  
26 patients will have been diagnosed in other healthcare settings, for example, PHE estimated that in  
27 England during 2016 5.9% and 7.3% of new diagnoses in men and women, respectively, were made  
28 in Primary Care<sup>34</sup>. This implies that estimates of the prevalence of diagnosed HIV based on  
29 diagnoses recorded in CPRD will be under-estimates for the UK which we have shown by comparing  
30 with surveillance data from PHE.  
31  
32  
33  
34  
35  
36  
37  
38  
39  
40  
41  
42  
43

### 44 *Strengths and weaknesses in relation to other studies, discussing important differences in results*

45  
46 HIV testing in Primary Care in the Netherlands also decreased between 2010-2015 despite similar  
47 guidelines encouraging more pro-active screening for HIV<sup>35</sup>. Although HIV testing in Primary Care has  
48 declined, the rates of late diagnosis (CD4 count less than 350 cells/mL) have also declined from 50%  
49 in 2010 to 39% in 2015<sup>36</sup>, indicating a discordancy between the testing in Primary Care and  
50 diagnosis. This indicates that increased testing has likely occurred in other settings. Earlier diagnosis  
51 may be due to better detection in secondary care, either from screening or testing those with  
52 indicator conditions, or through other routes such as sexual health clinics, insurance requests or  
53 specialist testing services. Moreover, if testing has become better targeted in Primary Care and  
54 incidence in the consulting population is decreasing then even without an increase in testing, those  
55  
56  
57  
58  
59  
60

1  
2  
3 who get tested may be tested earlier in the course of HIV infection leading to reduced rates of late  
4 diagnoses. However, we have shown a significant decline in HIV testing in Primary Care since the  
5 previous analysis by Evans *et al*<sup>25</sup> on testing up to 2005, and therefore we can look at increased  
6 testing in primary care as an option to improve early HIV detection rates.  
7  
8  
9

#### 10 *Meaning of the study: possible explanations and implications for clinicians and policymakers*

11  
12 Since 2015, UK and international treatment guidelines<sup>37</sup> for those diagnosed with HIV recommend  
13 immediate treatment with antiretroviral therapy (ART) due to findings from the START trial<sup>38</sup>. This  
14 change, together with pre-exposure prophylaxis (PrEP), has resulted in a decline in HIV infection  
15 rates for the last 2 years<sup>34</sup>. Nevertheless, there are still opportunities for diagnosing HIV earlier in  
16 Primary Care whilst testing rates remain very low. Current UK testing guidelines<sup>34</sup> recommend  
17 people attending General Practices in areas of high HIV prevalence should be offered an HIV test at  
18 registration or when having a blood test if they have not had an HIV test in the past 12 months.  
19 People newly diagnosed with an HIV indicator condition should also be offered an HIV test. The aim  
20 is to diagnose HIV earlier as late diagnosis of HIV is associated with increased morbidity and  
21 mortality.<sup>7,39,40</sup> There are benefits for diagnosing HIV earlier both for the individual in terms of  
22 quality of life and life expectancy<sup>6</sup> and a wider societal benefit of reduced transmission and lower  
23 NHS treatment costs.  
24  
25  
26  
27  
28  
29  
30  
31  
32  
33  
34  
35

#### 36 *Unanswered questions and future research*

37  
38 Although it is a public health imperative, and target, to increase HIV testing and diagnosis, it is  
39 unclear how this could be implemented in Primary Care. A literature review undertaken of public  
40 and Health Care Professional (HCP) attitudes towards HIV testing in the UK showed that a proactive  
41 offer of an HIV test by the HCP was an important factor which could help increase testing rates.<sup>20</sup>  
42 Reasons for low levels of HIV testing by the HCP include fear/concern of offending patients,  
43 inadequate knowledge/training on HIV, low awareness of current testing guidelines,  
44 underestimation of patient risk, insufficient time, competing priorities, perceived burdensome  
45 consent process and pre-test discussion.<sup>18-20,41</sup> Studies indicate a need for education and training on  
46 HIV testing for HCP in Primary Care to overcome these barriers to testing.<sup>16,42</sup> Adequate  
47 interventions are needed to address these barriers so individuals can receive a timely HIV test and  
48 with it the important treatment benefits and care if found to be HIV positive. Another literature  
49 review has provided evidence that HIV indicator conditions have the potential to be used more  
50 effectively as triggers for earlier HIV testing<sup>43</sup>. Opt-out testing can facilitate increased HIV testing as  
51  
52  
53  
54  
55  
56  
57  
58  
59  
60

1  
2  
3 has been evident from a trial in emergency care setting<sup>44</sup>. When blood tests are carried out for any  
4 reason in primary care, there could also be an opt-out HIV test. Computer prompts based on risk  
5 algorithms are another strategy to support HIV testing<sup>45-49</sup> which could be based on electronic health  
6 records such as those in CPRD.  
7  
8  
9

10  
11  
12  
13 Although the results shown here are for a UK based population the methodology may be applicable  
14 to other healthcare systems. They provide accurate testing rates and detection rates in Primary Care  
15 which are measures of HIV testing that can be used for international comparisons. A key element  
16 for preventing transmission and late diagnosis of HIV is testing in Primary Care, based on a screening  
17 strategy or indicator conditions<sup>50</sup>. These data inform us of the current situation on testing and will  
18 be useful in planning and evaluating interventions to improve this.  
19  
20  
21  
22

23  
24 The data on the discrepancy between PHE and CPRD prevalence of HIV positive status being  
25 recorded is another finding of importance for planning. New testing strategies such as home test and  
26 rapid testing outside of standard health care settings may contribute to the decrease in testing in  
27 Primary Care. These need to have a strategy in their delivery to feed back to Primary Care to  
28 maximise the benefits to patients and their health networks.  
29  
30  
31  
32  
33  
34

### 35 *Conclusions*

36 HIV testing rates have declined in Primary Care in all age groups, although there has been a fall in  
37 late presentation. HIV testing rates are highest in London, and higher in urban areas than rural areas.  
38 Increased testing would likely increase the number of positive tests and help prevent late diagnosis.  
39 Further interventions to increase selectivity of testing (positive cases per test) may be required,  
40 either at the individual level using risk factors and HIV indicator conditions or at the practice level  
41 using knowledge of local HIV prevalence.  
42  
43  
44  
45  
46  
47  
48

### 49 **Contributor and guarantor information**

50 MG and MM planned the research study and were responsible for study design. JM and TJ advised  
51 on study design. CD applied for ethics approval and did the literature search. TJ and CD obtained  
52 data from CPRD and helped with coding and extracting data. SM was responsible for statistical  
53 analyses, tables and graphs. MM, SM and MG wrote the first draft of the paper. All authors  
54 contributed to writing and revising the paper and agreed to submission. MM acts as guarantor for  
55 the conduct of the study, had full access to the data and made decision to publish.  
56  
57  
58  
59  
60

### **Ethics approval**

The protocol was submitted to and approved by the independent scientific advisory committee for the CPRD (protocol ISAC number 16\_172A). The study was approved by the South West, Frenchay, Research Ethics Committee on the 19/09/2016 (REC reference 16/SW/0286).

### **Transparency statement**

Margaret May affirms that the manuscript is an honest, accurate and transparent account of the study, and that no important aspects of the study have been omitted. The sponsor had no role in research or decision to publish.

### **Competing Interests statement**

No authors have any competing interests.

### **Role of the funding source:**

The study was supported by Research Capability Funding from North Bristol NHS Trust. This study is based in part on data from the Clinical Practice Research Datalink (CPRD) obtained under licence from the UK Medicines and Healthcare products Regulatory Agency. This report is independent research supported by the National Institute for Health Research (NIHR) Health Protection Research Unit (HPRU) in Evaluation of Interventions at University of Bristol in partnership with Public Health England. TJ's time is supported by the NIHR Collaboration for Leadership in Applied Health Research and Care West (CLAHRC West) at University Hospitals Bristol NHS Foundation Trust. MM is also supported by the NIHR Biomedical Research Centre at University Hospitals Bristol NHS Foundation Trust and the University of Bristol. However, the interpretation and conclusions contained in this report are those of the authors and not necessarily those of the NHS, the NIHR, CPRD or the Department of Health.

### **Acknowledgements**

We would like to thank the following authors; Joni Jackson, Natalia V. Lewis, Gene S Feder, Penny Whiting, Timothy Jones, John Macleod and Maria Theresa Redaniel for sharing their medical codes to identify pregnancy, delivery and abortion used in our data analysis.

### **Data sharing**

No additional data is available as use of the data was licensed by CPRD and therefore cannot be shared further.

## References

1. Brown AE, Kirwan PD, Chau C, Khawam J, Gill ON, VC. D. Public Health England, London. Towards elimination of HIV transmission, AIDS and HIV-related deaths in the UK – 2017 report. 2017.
2. Kirwan PC, C; Brown, AE; Delpech, VC; and contributors;. *HIV in the UK - 2016 report*. London: Public Health England;2016.
3. Ellis S, Curtis H, Ong ELC, British HIVAB, Stand BCA. HIV diagnoses and missed opportunities. Results of the British HIV Association (BHIVA) National Audit 2010. *Clinical Medicine*. 2012;12(5):430-434.
4. Chadborn TR, Delpech VC, Sabin CA, Sinka K, Evans BG. The late diagnosis and consequent short-term mortality of HIV-infected heterosexuals (England and Wales, 2000-2004). *Aids*. 2006;20(18):2371-2379.
5. Girardi E, Sabin CA, Monforte AdA. Late diagnosis of HIV infection: Epidemiological features, consequences and strategies to encourage earlier testing. *Jaids-Journal of Acquired Immune Deficiency Syndromes*. 2007;46:S3-S8.
6. May M, Gompels M, Delpech V, et al. Impact of late diagnosis and treatment on life expectancy in people with HIV-1: UK Collaborative HIV Cohort (UK CHIC) Study. *British Medical Journal*. 2011;343(d6016).
7. Croxford S, Kitching A, Desai S, et al. Mortality and causes of death in people diagnosed with HIV in the era of highly active antiretroviral therapy compared with the general population: an analysis of a national observational cohort. *The Lancet Public Health*. 2017;2(1):e35-e46.
8. Beck EJ, Mandalia S, Sangha R, et al. The Cost-Effectiveness of Early Access to HIV Services and Starting cART in the UK 1996-2008. *PloS one*. 2011;6(12).
9. Rodger AJ, Cambiano V, Bruun T, et al. Sexual Activity Without Condoms and Risk of HIV Transmission in Serodifferent Couples When the HIV-Positive Partner Is Using Suppressive Antiretroviral Therapy. *Jama-J Am Med Assoc*. 2016;316(2):171-181.
10. NICE. National Institute of Health and Care Excellence (NICE). HIV testing: increasing uptake among people who may have undiagnosed HIV. Economic assessment: resource impact of recommendations. March 2016 (accessed 07/2016) <https://www.nice.org.uk/guidance/GID-PHG91/documents/economic-report>. 2016.
11. NICE. National Institute of Health and Care Excellence (NICE). HIV testing: increasing uptake among people who may have undiagnosed HIV. (accessed 09/2017) [niceorguk/guidance/ng60](http://niceorguk/guidance/ng60). 2016.
12. Read P, Armstrong-James D, Tong CYW, Fox J. Missed opportunities for HIV testing-a costly oversight. *Qjm-an International Journal of Medicine*. 2011;104(5):421-424.
13. Joore IK, Arts DL, Kruijer MJ, et al. HIV indicator condition-guided testing to reduce the number of undiagnosed patients and prevent late presentation in a high-prevalence area: a case-control study in primary care. *Sex Transm Infect*. 2015;91(7):467-472.
14. Burns FM, Johnson AM, Nazroo J, et al. Missed opportunities for earlier HIV diagnosis within primary and secondary healthcare settings in the UK. *Aids*. 2008;22(1):115-122.
15. BHIVA. British HIV Association. UK National Guidelines for HIV testing 2008; (accessed 04/2016) <http://www.bhiva.org/HIVtesting2008.aspx>. 2008.
16. Elmahdi R, Gerver SM, Guillen GG, Fidler S, Cooke G, Ward H. Low levels of HIV test coverage in clinical settings in the UK: a systematic review of adherence to 2008 guidelines. *Sexually transmitted infections*. 2014;90(2):119-124.
17. Hartney T, Kennedy I, Crook P, Nardone A. Expanded HIV testing in high-prevalence areas in England: results of a 2012 audit of sexual health commissioners. *HIV medicine*. 2014;15(4):251-254.

18. Deblonde J, De Koker P, Hamers FF, Fontaine J, Luchters S, Temmerman M. Barriers to HIV testing in Europe: a systematic review. *European Journal of Public Health*. 2010;20(4):422-432.
19. Bolsewicz K, Vallely A, Debattista J, Whittaker A, Fitzgerald L. Factors impacting HIV testing: a review - perspectives from Australia, Canada, and the UK. *Aids Care-Psychological and Socio-Medical Aspects of Aids/Hiv*. 2015;27(5):570-580.
20. Davies C, Gompels M, May M. Public and Healthcare Practitioner attitudes towards HIV testing: Review of the evidence in the UK. *International STD Research and Reviews*. 2015;3(3):991-1022.
21. Scognamiglio P, Chiaradia G, De Carli G, et al. The potential impact of routine testing of individuals with HIV indicator diseases in order to prevent late HIV diagnosis. *Bmc Infect Dis*. 2013;13.
22. Goodall L, Leen C. Late diagnosis of HIV: could this be avoided? *Scott Med J*. 2011;56(2):84-86.
23. Joore IK, Reukers DF, Donker GA, et al. Missed opportunities to offer HIV tests to high-risk groups during general practitioners' STI-related consultations: an observational study. *BMJ Open*. 2016;6(1):e009194.
24. Health Protection Agency (HPA). Time to test for HIV: expanding HIV testing in healthcare and community services in England (accessed 09/2017) [http://www.bhiva.org/documents/Publications/Time\\_to\\_test\\_final\\_report\\_Sept\\_2011.pdf](http://www.bhiva.org/documents/Publications/Time_to_test_final_report_Sept_2011.pdf). 2011.
25. Evans HER, Mercer CH, Rait G, et al. Trends in HIV testing and recording of HIV status in the UK primary care setting: a retrospective cohort study 1995-2005. *Sexually transmitted infections*. 2009;85(7):520-526.
26. Herrett E, Gallagher AM, Bhaskaran K, et al. Data Resource Profile: Clinical Practice Research Datalink (CPRD). *Int J Epidemiol*. 2015;44(3):827-836.
27. Jackson J, Lewis NV, Feder GS, et al. Exposure to domestic violence and abuse and consultations for emergency contraception: nested case-control study in a UK primary care dataset. *Br J Gen Pract* DOI: <https://doi.org/10.3399/bjgp18X700277>. 2018.
28. National Statistics. English Indices of Deprivation 2015. Statistics on relative deprivation in small areas in England. <https://www.gov.uk/government/statistics/english-indices-of-deprivation-2015> (accessed 04/2016). 2015.
29. Rhodes SD, Vissman AT, Stowers J, et al. A CBPR Partnership Increases HIV Testing Among Men Who Have Sex With Men (MSM): Outcome Findings From a Pilot Test of the CyBER/testing Internet Intervention. *Health Education & Behavior*. 2011;38(3):311-320.
30. Public Health England (PHE). Health Protection Report. Annual report from the sentinel surveillance study of blood borne virus testing in England: data for January to December 2015  
(Accessed July 2016) [https://assets.publishing.service.gov.uk/government/uploads/system/uploads/attachment\\_data/file/540332/hpr2416\\_bbvs.pdf](https://assets.publishing.service.gov.uk/government/uploads/system/uploads/attachment_data/file/540332/hpr2416_bbvs.pdf). 2016.
31. NICE. National Institute for Health and Care Excellence (NICE). Increasing the uptake of HIV testing to reduce undiagnosed infection and prevent transmission among black African communities living in England. *NICE Public Health Guidance 33 (accessed 10/2014)* <http://nice.org.uk>. 2011.
32. NICE. National Institute for Health and Care Excellence (NICE). Increasing the uptake of HIV testing among men who have sex with men. *NICE Public Health Guidance 34 (accessed 09/2014)* <http://nice.org.uk>. 2011.
33. Tavošchi L, Gomes Dias J, Pharris A. New HIV diagnoses among adults aged 50 years or older in 31 European countries, 2004-15: an analysis of surveillance data. *Lancet Hiv*. 2017;4(11):e514-e521.

- 1  
2  
3  
4  
5  
6  
7  
8  
9  
10  
11  
12  
13  
14  
15  
16  
17  
18  
19  
20  
21  
22  
23  
24  
25  
26  
27  
28  
29  
30  
31  
32  
33  
34  
35  
36  
37  
38  
39  
40  
41  
42  
43  
44  
45  
46  
47  
48  
49  
50  
51  
52  
53  
54  
55  
56  
57  
58  
59  
60
34. Nash SGF, M; Gill, O.N.; Connor, N.; and contributors;. *HIV testing in England: 2017 report.* . London: Public Health England; 1/11/2017 2017.
  35. Joore IK, van Bergen J, Ter Riet G, van der Maat A, van Dijk N. Development and evaluation of a blended educational programme for general practitioners' trainers to stimulate proactive HIV testing. *BMC family practice.* 2018;19(1):36.
  36. Public Health England (PHE). HIV: annual data tables. HIV surveillance data in the UK by demographic characteristics and geographical region. (Accessed 7/2016) <https://www.gov.uk/government/statistics/hiv-annual-data-tables>. 2015 (updated 2017).
  37. World Health Organisation (WHO). Guideline on when to start antiretroviral therapy and on pre-exposure prophylaxis for HIV. Geneva: World Health Organization, 2015 (<http://www.who.int/hiv/pub/guidelines/earlyrelease-arv/en> (accessed 07/17). Sept 2015.
  38. Lundgren JD, Babiker AG, Gordin F, et al. Initiation of Antiretroviral Therapy in Early Asymptomatic HIV Infection. *The New England journal of medicine.* 2015;373(9):795-807.
  39. Sabin C. Review of life expectancy in people with HIV in settings with optimal ART access: what we know and what we don't. *Journal of the International AIDS Society.* 2012;15:4.
  40. Nakagawa F, Lodwick RK, Smith CJ, et al. Projected life expectancy of people with HIV according to timing of diagnosis. *Aids.* 2012;26(3):335-343.
  41. Hunter E, Perry M, Leen C, Premchand N. HIV testing: getting the message across—a survey of knowledge, attitudes and practice among non-HIV specialist physicians. *Postgraduate Medical Journal.* 2012;88(1036):59-65.
  42. Pillay TD, Mullineux J, Smith CJ, Matthews P. Unlocking the potential: longitudinal audit finds multifaceted education for general practice increases HIV testing and diagnosis. *Sexually transmitted infections.* 2013;89(3):191-U125.
  43. Davies C, Gompels M, May M. Use and Effectiveness of HIV Indicator Conditions in Guiding HIV Testing: A Review of the Evidence *International STD Research & Reviews.* 2017;6(2):1-27.
  44. Montoy JC, Dow WH, Kaplan BC. Patient choice in opt-in, active choice, and opt-out HIV screening: randomized clinical trial. *BMJ (Clinical research ed).* 2016;532:h6895.
  45. Federman D, Kravetz J, Vasquez L, , Campbell S. Improving human immunodeficiency virus testing rates with an electronic clinical reminder. *The American Journal of Medicine.* 2012;125(3):240-242.
  46. Schrantz SJ, Babcock CA, Theodosis C, Brown S, Mercer S, Pillow MT ea. A targeted, conventional assay, emergency department HIV testing program integrated with existing clinical procedures. . *Ann Emerg Med.* 2011;58((1 Suppl 1)::S85-88.e81.
  47. Goetz MB, Hoang T, Bowman C, Knapp H, Rossman B, Smith R. A system-wide intervention to improve HIV testing in the Veterans Health Administration. . *J Gen Intern Med.* 2008;23(8):1200-1207.
  48. Menza TW HJ, Celum CL, Golden, MR. Prediction of HIV acquisition among men who have sex with men. . *Sex TransmDis.* 2009;36(9):547-555.
  49. Sharghi N, Bosch RJ, Mayer K, Essex M, Seage GR. The development and utility of a clinical algorithm to predict early HIV-1 infection. . *J Acquir Immune Defic Syndr.* 2005;40(4):472-478.
  50. Joore IK, Twisk DE, Vanrolleghem AM, et al. The need to scale up HIV indicator condition-guided testing for early case-finding: a case-control study in primary care. *BMC family practice.* 2016;17(1):161.



Table 1: Patient and practice demographics

| Demographic Variable                                                    | Group              | Frequency | Percentage (%) |
|-------------------------------------------------------------------------|--------------------|-----------|----------------|
| <b>Gender</b>                                                           | Males              | 2,871,884 | 48.03          |
|                                                                         | Females            | 3,107,562 | 51.97          |
|                                                                         | Other/Unknown      | 152       | 0.00           |
| <b>Age (in 2015)</b>                                                    | 16-44              | 2,684,443 | 44.89          |
|                                                                         | >44                | 3,295,155 | 55.11          |
| <b>Ethnicity</b>                                                        | Asian              | 147,295   | 2.46           |
|                                                                         | Black African      | 45,632    | 0.76           |
|                                                                         | Black Caribbean    | 28,558    | 0.48           |
|                                                                         | Other              | 118,934   | 1.99           |
|                                                                         | White              | 3,328,189 | 55.66          |
|                                                                         | Unknown            | 2,310,990 | 38.65          |
| <b>Region</b>                                                           | Outside London     | 4,693,116 | 78.49          |
|                                                                         | London             | 1,129,924 | 18.90          |
|                                                                         | Unknown            | 156,558   | 2.62           |
| <b>Urban/Rural</b>                                                      | Urban(Conurbation) | 2,134,497 | 35.70          |
|                                                                         | Urban(City/Town)   | 2,991,079 | 50.02          |
|                                                                         | Rural              | 697,452   | 11.66          |
|                                                                         | Unknown            | 156,558   | 2.62           |
| <b>Patient IMD (2015)</b><br>1=least deprived, ...,<br>5=most deprived  | Quintile 1         | 1,285,213 | 21.49          |
|                                                                         | Quintiles 2,3,4    | 3,564,936 | 59.62          |
|                                                                         | Quintile 5         | 964,853   | 16.14          |
|                                                                         | Unknown            | 164,596   | 2.75           |
| <b>Practice IMD (2015)</b><br>1=least deprived, ...,<br>5=most deprived | Quintile 1         | 1,249,293 | 20.89          |
|                                                                         | Quintiles 2,3,4    | 3,702,313 | 61.92          |
|                                                                         | Quintile 5         | 871,434   | 14.57          |
|                                                                         | Unknown            | 156,558   | 2.62           |

Table 2: Testing rates (per 100,000 person years) for **males** and incidence rate ratios (IRR) with 95% CI for years 2005, 2010, 2015.

| London                     |                |                    |         |                  |                     |         |                 |                    |         |
|----------------------------|----------------|--------------------|---------|------------------|---------------------|---------|-----------------|--------------------|---------|
|                            | 2005           |                    |         | 2010             |                     |         | 2015            |                    |         |
|                            | Rate (95% CI)  | IRR (95% CI)       | p-value | Rate (95% CI)    | IRR (95% CI)        | p-value | Rate (95% CI)   | IRR (95% CI)       | p-value |
| <b>Overall</b>             | 133 (117, 148) | -                  | -       | 273 (251, 295)   | -                   | -       | 246 (225, 266)  | -                  | -       |
| <b>Age</b>                 |                |                    |         |                  |                     |         |                 |                    |         |
| 16-44                      | 175 (151, 198) | 1                  | <0.0001 | 366 (333, 400)   | 1                   | <0.0001 | 304 (272, 336)  | 1                  | <0.0001 |
| >=45                       | 75 (56, 93)    | 0.43 (0.33, 0.56)  |         | 151 (127, 176)   | 0.41 (0.34, 0.50)   |         | 180 (154, 206)  | 0.59 (0.50, 0.71)  |         |
| <b>Ethnicity</b>           |                |                    |         |                  |                     |         |                 |                    |         |
| White                      | 102 (80, 125)  | 1                  |         | 240 (206, 275)   | 1                   |         | 222 (187, 256)  | 1                  |         |
| Asian                      | 152 (73, 232)  | 1.49 (0.85, 2.62)  | <0.0001 | 329 (220, 438)   | 1.37 (0.95, 1.96)   | <0.0001 | 167 (88, 247)   | 0.76 (0.47, 1.22)  | <0.0001 |
| Black African              | 669 (361, 977) | 6.53 (3.93, 10.85) |         | 1227 (849, 1605) | 5.10 (3.63, 7.18)   |         | 919 (602, 1236) | 4.15 (2.84, 6.06)  |         |
| Black Caribbean            | 216 (432, 389) | 2.11 (0.92, 4.82)  |         | 361 (148, 574)   | 1.50 (0.82, 2.76)   |         | 523 (267, 779)  | 2.36 (1.42, 3.95)  |         |
| <b>Patient IMD (2015)*</b> |                |                    |         |                  |                     |         |                 |                    |         |
| Quintile 1                 | 160 (119, 202) | 1                  |         | 207 (159, 254)   | 1                   |         | 200 (153, 248)  | 1                  |         |
| Quintiles 2,3,4            | 120 (102, 139) | 0.75 (0.56, 1.01)  | 0.0912  | 252 (226, 279)   | 1.22 (0.95, 1.57)   | <0.0001 | 177 (155, 198)  | 0.88 (0.68, 1.14)  | <0.0001 |
| Quintile 5                 | 155 (114, 195) | 0.96 (0.67, 1.40)  |         | 415 (351, 480)   | 2.01 (1.53, 2.65)   |         | 565 (487, 643)  | 2.82 (2.16, 3.68)  |         |
| Outside London             |                |                    |         |                  |                     |         |                 |                    |         |
|                            | 2005           |                    |         | 2010             |                     |         | 2015            |                    |         |
|                            | Rate (95% CI)  | IRR (95% C.I.)     | p-value | Rate (95% CI)    | IRR (95% C.I.)      | p-value | Rate (95% CI)   | IRR (95% C.I.)     | p-value |
| <b>Overall</b>             | 65 (60, 70)    | -                  | -       | 106 (100, 112)   | -                   | -       | 65 (60, 69)     | -                  | -       |
| <b>Age</b>                 |                |                    |         |                  |                     |         |                 |                    |         |
| 16-44                      | 95 (87, 103)   | 1                  | <0.0001 | 161 (150, 172)   | 1                   | <0.0001 | 100 (91, 109)   | 1                  | <0.0001 |
| >=45                       | 34 (29, 39)    | 0.36 (0.30, 0.42)  |         | 54 (48, 60)      | 0.34 (0.30, 0.38)   |         | 37 (32, 42)     | 0.37 (0.32, 0.43)  |         |
| <b>Ethnicity</b>           |                |                    |         |                  |                     |         |                 |                    |         |
| White                      | 63 (57, 69)    | 1                  |         | 100 (92, 108)    | 1                   |         | 63 (57, 70)     | 1                  |         |
| Asian                      | 159 (89, 229)  | 2.52 (1.61, 3.94)  | <0.0001 | 336 (245, 427)   | 3.36 (2.55, 4.44)   |         | 200 (135, 266)  | 3.16 (2.25, 4.45)  |         |
| Black African              | 579 (221, 937) | 9.17 (4.90, 17.16) |         | 1321 (859, 1783) | 13.24 (9.23, 18.97) |         | 584 (289, 878)  | 9.22 (5.51, 15.44) |         |
| Black Caribbean            | 185 (37, 366)  | 2.93 (1.09, 7.83)  |         | 506 (156, 856)   | 5.06 (2.86, 8.96)   |         | 202 (25, 379)   | 3.19 (1.32, 7.70)  |         |
| <b>Patient IMD (2015)*</b> |                |                    |         |                  |                     |         |                 |                    |         |
| Quintile 1                 | 60 (51, 69)    | 1                  |         | 98 (87, 110)     | 1                   |         | 61 (52, 70)     | 1                  |         |
| Quintiles 2,3,4            | 60 (54, 66)    | 1.0 (0.84, 1.20)   | 0.0002  | 94 (87, 101)     | 0.96 (0.83, 1.10)   | <0.0001 | 53 (48, 59)     | 0.87 (0.73, 1.04)  | <0.0001 |
| Quintile 5                 | 89 (75, 104)   | 1.49 (1.20, 1.86)  |         | 163 (145, 182)   | 1.66 (1.41, 1.96)   |         | 115 (99, 131)   | 1.89 (1.55, 2.31)  |         |
| <b>Urban/Rural class</b>   |                |                    |         |                  |                     |         |                 |                    |         |
| Conurbation                | 65 (55, 76)    | 1                  |         | 144 (129, 159)   | 1                   |         | 91 (79, 102)    | 1                  |         |
| City/Town                  | 69 (63, 75)    | 1.05 (0.88, 1.26)  | 0.0045  | 100 (93, 107)    | 0.70 (0.61, 0.79)   | <0.0001 | 60 (54, 65)     | 0.66 (0.56, 0.77)  | <0.0001 |
| Rural                      | 47 (37, 58)    | 0.72 (0.55, 0.95)  |         | 75 (62, 88)      | 0.52 (0.43, 0.64)   |         | 49 (39, 60)     | 0.55 (0.43, 0.70)  |         |

\*1=least deprived - 5=most deprived

Table 3: Testing rates (per 100000 person years) for **females** and incidence rate ratios (IRR) with 95% CI for years 2005, 2010, 2015 (antenatal testing excluded)

| London                     |                |                    |         |                 |                   |         |                |                    |         |
|----------------------------|----------------|--------------------|---------|-----------------|-------------------|---------|----------------|--------------------|---------|
|                            | 2005           | 2005               |         | 2010            | 2010              |         | 2015           | 2015               |         |
|                            | Rate (95% CI)  | IRR (95% CI)       | p-value | Rate (95% CI)   | IRR (95% CI)      | p-value | Rate (95% CI)  | IRR (95% CI)       | p-value |
| <b>Overall</b>             | 139 (123, 155) | -                  | -       | 309 (285, 332)  | -                 | -       | 243 (223, 264) | -                  | -       |
| <b>Age</b>                 |                |                    |         |                 |                   |         |                |                    |         |
| 16-44                      | 216 (189, 242) | 1                  |         | 479 (440, 517)  | 1                 |         | 327 (295, 360) | 1                  |         |
| >=45                       | 39 (26, 52)    | 0.18 (0.13, 0.26)  | <0.0001 | 93 (74, 112)    | 0.19 (0.16, 0.24) | <0.0001 | 150 (127, 173) | 0.46 (0.38, 0.55)  | <0.0001 |
| <b>Ethnicity</b>           |                |                    |         |                 |                   |         |                |                    |         |
| White                      | 120 (100, 140) | 1                  |         | 270 (239, 301)  | 1                 |         | 170 (144, 195) | 1                  |         |
| Asian                      | 199 (117, 280) | 1.65 (1.09, 2.51)  |         | 261 (183, 339)  | 0.97 (0.70, 1.33) |         | 190 (126, 254) | 1.12 (0.78, 1.62)  |         |
| Black African              | 415 (234, 596) | 3.46 (2.21, 5.43)  | <0.0001 | 825 (602, 1048) | 3.06 (2.29, 4.08) | <0.0001 | 728 (527, 929) | 4.30 (3.13, 5.87)  | <0.0001 |
| Black Caribbean            | 248 (96, 400)  | 2.06 (1.15, 3.72)  |         | 438 (260, 617)  | 1.63 (1.06, 2.48) |         | 399 (221, 578) | 2.35 (1.50, 3.70)  |         |
| <b>Patient IMD (2015)*</b> |                |                    |         |                 |                   |         |                |                    |         |
| Quintile 1                 | 153 (112, 194) | 1                  |         | 172 (130, 215)  | 1                 |         | 156 (115, 197) | 1                  |         |
| Quintiles 2,3,4            | 125 (106, 143) | 0.82 (0.60, 1.10)  | 0.0278  | 284 (258, 311)  | 1.65 (1.27, 2.14) | <0.0001 | 195 (173, 218) | 1.25 (0.95, 1.66)  | <0.0001 |
| Quintile 5                 | 183 (138, 227) | 1.19 (0.84, 1.71)  |         | 539 (463, 615)  | 3.13 (2.37, 4.14) |         | 520 (448, 592) | 3.33 (2.50, 4.46)  |         |
| Outside London             |                |                    |         |                 |                   |         |                |                    |         |
|                            | 2005           | 2005               |         | 2010            | 2010              |         | 2015           | 2015               |         |
|                            | Rate (95% CI)  | IRR (95% CI)       | p-value | Rate (95% CI)   | IRR (95% CI)      | p-value | Rate (95% CI)  | IRR (95% CI)       | p-value |
| <b>Overall</b>             | 67 (62, 71)    | -                  | -       | 117 (111, 123)  | -                 | -       | 83 (78, 89)    | -                  | -       |
| <b>Age</b>                 |                |                    |         |                 |                   |         |                |                    |         |
| 16-44                      | 118 (108, 127) | 1                  |         | 216 (204, 229)  | 1                 |         | 160 (148, 171) | 1                  |         |
| >=45                       | 21 (17, 24)    | 0.18 (0.15, 0.21)  | <0.0001 | 34 (29, 38)     | 0.16 (0.14, 0.18) | <0.0001 | 29 (25, 33)    | 0.18 (0.16, 0.21)  | <0.0001 |
| <b>Ethnicity</b>           |                |                    |         |                 |                   |         |                |                    |         |
| White                      | 67 (61, 72)    | 1                  |         | 117 (110, 125)  | 1                 |         | 77 (71, 83)    | 1                  |         |
| Asian                      | 188 (123, 252) | 2.82 (2.01, 3.95)  |         | 357 (284, 430)  | 3.04 (2.46, 3.77) |         | 207 (155, 259) | 2.69 (2.07, 3.50)  |         |
| Black African              | 515 (270, )    | 7.33 (4.77, 12.53) | <0.0001 | 829 (563, 1094) | 7.07 (5.13, 9.73) | <0.0001 | 432 (249, 616) | 5.63 (3.71, 8.53)  | <0.0001 |
| Black Caribbean            | 235 (61, 409)  | 3.53 (1.68, 7.44)  |         | 778 (468, 1087) | 6.63 (4.49, 9.79) |         | 489 (257, 721) | 6.36 (3.93, 10.30) |         |
| <b>Patient IMD (2015)*</b> |                |                    |         |                 |                   |         |                |                    |         |
| Quintile 1                 | 64 (54, 73)    | 1                  |         | 95 (84, 106)    | 1                 |         | 71 (61, 81)    | 1                  |         |
| Quintiles 2,3,4            | 61 (55, 67)    | 0.97 (0.81, 1.15)  | 0.0001  | 95 (88, 102)    | 1.00 (0.87, 1.15) | <0.0001 | 72 (65, 78)    | 1.01 (0.86, 1.19)  | <0.0001 |
| Quintile 5                 | 92 (77, 107)   | 1.45 (1.17, 1.79)  |         | 241 (218, 265)  | 2.54 (2.19, 2.95) |         | 152 (134, 170) | 2.15 (1.80, 2.57)  |         |
| <b>Urban/Rural class</b>   |                |                    |         |                 |                   |         |                |                    |         |
| Conurbation                | 54 (45, 64)    | 1                  |         | 165 (148, 181)  | 1                 |         | 120 (106, 133) | 1                  |         |
| City/Town                  | 72 (66, 78)    | 1.33 (1.10, 1.60)  | 0.0078  | 108 (101, 116)  | 0.66 (0.59, 0.74) | <0.0001 | 77 (70, 83)    | 0.64 (0.56, 0.74)  | <0.0001 |
| Rural                      | 62 (50, 74)    | 1.15 (0.89, 1.47)  |         | 85 (71, 99)     | 0.52 (0.43, 0.62) |         | 60 (48, 72)    | 0.50 (0.40, 0.62)  |         |

\*1=least deprived - 5=most deprived

Table 4: Prevalence (with 95% CI) of diagnosed HIV recorded in CPRD (per 100,000 persons) by gender, age, ethnicity and patient IMD, for London and outside London.

| London                    |                     |                   |                   |
|---------------------------|---------------------|-------------------|-------------------|
|                           | Prevalence (95% CI) |                   |                   |
|                           | 2005                | 2010              | 2015              |
| All                       | 140 (129, 151)      | 230 (216, 244)    | 282 (267, 297)    |
| <b>Gender</b>             |                     |                   |                   |
| Males                     | 191 (172, 209)      | 294 (271, 317)    | 369 (344, 395)    |
| Females                   | 91 (78, 103)        | 170 (153, 187)    | 199 (181, 217)    |
| <b>Age</b>                |                     |                   |                   |
| 16-44                     | 168 (152, 184)      | 234 (215, 253)    | 229 (210, 249)    |
| >44                       | 103 (88, 117)       | 226 (205, 247)    | 341 (316, 365)    |
| <b>Ethnicity</b>          |                     |                   |                   |
| White                     | 127 (112, 143)      | 183 (164, 202)    | 224 (202, 246)    |
| Asian                     | 45 (17, 72)         | 84 (50, 119)      | 96 (60, 131)      |
| Black African             | 1465 (1205, 1726)   | 2350 (2055, 2646) | 2597 (2294, 2899) |
| Black Caribbean           | 195 (97, 294)       | 431 (291, 572)    | 538 (381, 695)    |
| <b>Patient IMD (2015)</b> |                     |                   |                   |
| Quantile 1                | 32 (19, 45)         | 86 (65, 107)      | 121 (96, 146)     |
| Quantiles 2,3,4           | 136 (122, 149)      | 212 (195, 228)    | 256 (238, 274)    |
| Quantile 5                | 268 (230, 306)      | 444 (397, 491)    | 544 (492, 596)    |
| Outside London            |                     |                   |                   |
|                           | Prevalence (95% CI) |                   |                   |
|                           | 2005                | 2010              | 2015              |
| All                       | 38 (36, 41)         | 64 (61, 67)       | 81 (77, 85)       |
| <b>Gender</b>             |                     |                   |                   |
| Males                     | 50 (46, 54)         | 81 (76, 86)       | 105 (99, 110)     |
| Females                   | 26 (23, 29)         | 48 (44, 52)       | 58 (54, 62)       |
| <b>Age</b>                |                     |                   |                   |
| 16-44                     | 55 (51, 59)         | 78 (72, 83)       | 82 (76, 87)       |
| >44                       | 22 (19, 25)         | 52 (48, 56)       | 80 (76, 85)       |
| <b>Ethnicity</b>          |                     |                   |                   |
| White                     | 29 (26, 32)         | 46 (43, 50)       | 60 (56, 64)       |
| Asian                     | 37 (16, 59)         | 40 (21, 59)       | 55 (34, 76)       |
| Black African             | 2537 (2110, 2964)   | 3663 (3236, 4091) | 3933 (3514, 4353) |
| Black Caribbean           | 135 (35, 236)       | 347 (195, 499)    | 484 (308, 660)    |
| <b>Patient IMD (2015)</b> |                     |                   |                   |
| Quantile 1                | 19 (16, 23)         | 31 (26, 35)       | 42.58 (37, 48)    |
| Quantiles 2,3,4           | 35 (32, 38)         | 60 (56, 65)       | 77 (72, 81)       |
| Quantile 5                | 82 (72, 91)         | 132 (121, 144)    | 159 (146, 172)    |

1 Figure legends:  
2

3 Figure 1: Trend in HIV testing rates per 100,000 person years for the period 2000-2015 by gender  
4 and age group, with and without inclusion of antenatal testing.  
5  
6  
7

8 Figure 2: Trend in the percentage of HIV tests that were positive for the period 2000-2015 by gender  
9 and age group, with and without inclusion of antenatal testing.  
10  
11  
12  
13  
14  
15  
16  
17  
18  
19  
20  
21  
22  
23  
24  
25  
26  
27  
28  
29  
30  
31  
32  
33  
34  
35  
36  
37  
38  
39  
40  
41  
42  
43  
44  
45  
46  
47  
48  
49  
50  
51  
52  
53  
54  
55  
56  
57  
58  
59  
60

For peer review only



Figure 1 : Trend in HIV testing rates per 100,000 person years for the period 2000-2015 by gender and age group, with and without inclusion of antenatal testing

90x90mm (300 x 300 DPI)

1  
2  
3  
4  
5  
6  
7  
8  
9  
10  
11  
12  
13  
14  
15  
16  
17  
18  
19  
20  
21  
22  
23  
24  
25  
26  
27  
28  
29  
30  
31  
32  
33  
34  
35  
36  
37  
38  
39  
40  
41  
42  
43  
44  
45  
46  
47  
48  
49  
50  
51  
52  
53  
54  
55  
56  
57  
58  
59  
60



Figure 2: Trend in the percentage of HIV tests that were positive for the period 2000-2015 by gender and age group, with and without inclusion of antenatal testing.

283x207mm (300 x 300 DPI)



Supplementary figure: Trend (unsmoothed graph) in the percentage of HIV tests that were positive for the period 2000-2015 by gender and age group, with and without inclusion of antenatal testing.

283x207mm (300 x 300 DPI)



Trends in HIV testing in the UK Primary Care setting: A 15 year retrospective cohort study 2000 to 2015

Supplementary tables

Supplementary table 1: HIV testing rates (per 100,000 person years) for years 2000-2015 (adults >16 years).

| Year | Males, all |       |                 | Females, all |       |                 | Females, excluding antenatal |       |                 |
|------|------------|-------|-----------------|--------------|-------|-----------------|------------------------------|-------|-----------------|
|      | N          | Rate  | 95% C.I.        | N            | Rate  | 95% C.I.        | N                            | Rate  | 95% C.I.        |
| 2000 | 1277056    | 16.4  | (14.2 , 18.7)   | 1332528      | 89.0  | (83.9 , 94.1)   | 1331517                      | 12.8  | (10.8 , 14.7)   |
| 2001 | 1299140    | 21.9  | (19.3 , 24.4)   | 1352604      | 293.1 | (283.9 , 302.3) | 1348950                      | 20.2  | (17.8 , 22.7)   |
| 2002 | 1317701    | 31.4  | (28.3 , 34.5)   | 1367949      | 396.3 | (385.7 , 406.9) | 1363158                      | 28.7  | (25.8 , 31.6)   |
| 2003 | 1341378    | 39.9  | (36.5 , 43.3)   | 1388107      | 501.9 | (490.0 , 513.7) | 1382140                      | 36.5  | (33.3 , 39.8)   |
| 2004 | 1359662    | 52.5  | (48.6 , 56.4)   | 1403681      | 563.0 | (550.5 , 575.5) | 1397351                      | 54.7  | (50.7 , 58.7)   |
| 2005 | 1374451    | 74.2  | (69.6 , 78.8)   | 1418325      | 653.1 | (639.7 , 666.6) | 1411272                      | 77.0  | (72.3 , 81.6)   |
| 2006 | 1390451    | 87.5  | (82.5 , 92.4)   | 1433622      | 711.6 | (697.7 , 725.6) | 1426111                      | 80.9  | (76.0 , 85.7)   |
| 2007 | 1405428    | 89.4  | (84.3 , 94.4)   | 1447828      | 795.2 | (780.5 , 809.9) | 1439651                      | 94.3  | (89.1 , 99.4)   |
| 2008 | 1409645    | 106.6 | (101.1 , 112.1) | 1455081      | 781.9 | (767.4 , 796.5) | 1447676                      | 113.1 | (107.4 , 118.7) |
| 2009 | 1418613    | 120.0 | (114.3 , 125.8) | 1463654      | 797.9 | (783.2 , 812.6) | 1456530                      | 128.6 | (122.6 , 134.6) |
| 2010 | 1424751    | 130.2 | (124.2 , 136.2) | 1470650      | 870.7 | (855.4 , 886.0) | 1463009                      | 145.3 | (139.0 , 151.6) |
| 2011 | 1421140    | 147.2 | (140.8 , 153.6) | 1474837      | 795.9 | (781.2 , 810.5) | 1468256                      | 169.0 | (162.1 , 175.8) |
| 2012 | 1427981    | 159.5 | (152.9 , 166.2) | 1482930      | 772.8 | (758.4 , 787.1) | 1476875                      | 176.7 | (169.7 , 183.6) |
| 2013 | 1430211    | 152.9 | (146.4 , 159.4) | 1486620      | 669.5 | (656.2 , 682.9) | 1481702                      | 178.9 | (171.9 , 185.9) |
| 2014 | 1436279    | 121.6 | (115.8 , 127.4) | 1487194      | 511.7 | (500.1 , 523.4) | 1483581                      | 141.8 | (135.6 , 148.1) |
| 2015 | 1421880    | 92.5  | (87.4 , 97.6)   | 1472023      | 391.5 | (381.2 , 401.7) | 1469400                      | 108.4 | (103.0 , 113.9) |

Supplementary table 2: HIV testing rates (per 100,000 person years) for years 2000-2015 (adults aged 16-44 years).

| Year | Males, all |       |                 | Females, all |        |                   | Females, excluding antenatal |       |                 |
|------|------------|-------|-----------------|--------------|--------|-------------------|------------------------------|-------|-----------------|
|      | N          | Rate  | 95% C.I.        | N            | Rate   | 95% C.I.          | N                            | Rate  | 95% C.I.        |
| 2000 | 671088     | 25.5  | (21.6 , 29.4)   | 655488       | 177.4  | (167.2 , 187.7)   | 654477                       | 22.5  | (18.8 , 26.1)   |
| 2001 | 681216     | 31.9  | (27.6 , 36.2)   | 665358       | 589.8  | (571.2 , 608.3)   | 661708                       | 35.8  | (31.2 , 40.4)   |
| 2002 | 688746     | 46.8  | (41.5 , 52.0)   | 672213       | 799.5  | (778.0 , 821.0)   | 667427                       | 52.3  | (46.7 , 57.8)   |
| 2003 | 698982     | 60.5  | (54.7 , 66.4)   | 681748       | 1012.9 | (989.0 , 1036.9)  | 675788                       | 66.7  | (60.5 , 73.0)   |
| 2004 | 706120     | 80.9  | (74.1 , 87.6)   | 688504       | 1132.5 | (1107.2 , 1157.8) | 682186                       | 98.4  | (90.7 , 106.1)  |
| 2005 | 710489     | 107.4 | (99.7 , 115.1)  | 694232       | 1308.9 | (1281.8 , 1335.9) | 687190                       | 134.0 | (125.2 , 142.8) |
| 2006 | 714842     | 131.1 | (122.6 , 139.6) | 700086       | 1428.5 | (1400.4 , 1456.7) | 692589                       | 139.8 | (130.7 , 148.8) |
| 2007 | 717434     | 133.5 | (124.9 , 142.2) | 704167       | 1598.2 | (1568.4 , 1627.9) | 696009                       | 160.6 | (151.0 , 170.3) |
| 2008 | 711542     | 159.1 | (149.7 , 168.5) | 702985       | 1586.6 | (1556.9 , 1616.3) | 695600                       | 206.5 | (195.4 , 217.5) |
| 2009 | 708782     | 181.0 | (170.9 , 191.1) | 700970       | 1618.4 | (1588.3 , 1648.5) | 693867                       | 225.9 | (214.3 , 237.4) |
| 2010 | 702732     | 195.7 | (185.2 , 206.2) | 696368       | 1789.0 | (1757.3 , 1820.6) | 688743                       | 262.4 | (250.0 , 274.7) |
| 2011 | 690732     | 225.9 | (214.5 , 237.2) | 689820       | 1636.2 | (1605.6 , 1666.7) | 683258                       | 301.1 | (287.7 , 314.5) |
| 2012 | 685037     | 236.9 | (225.3 , 248.6) | 685234       | 1598.0 | (1567.8 , 1628.2) | 679201                       | 313.2 | (299.6 , 326.8) |
| 2013 | 675812     | 232.6 | (221.0 , 244.2) | 677984       | 1385.4 | (1357.0 , 1413.7) | 673088                       | 315.1 | (301.4 , 328.9) |
| 2014 | 668263     | 174.8 | (164.6 , 185.0) | 667048       | 1056.2 | (1031.2 , 1081.2) | 663464                       | 238.6 | (226.5 , 250.8) |
| 2015 | 639033     | 136.6 | (127.4 , 145.9) | 638248       | 839.3  | (816.5 , 862.1)   | 635636                       | 190.1 | (179.0 , 201.1) |

1  
2  
3 **Trends in HIV testing in the UK Primary Care setting: A 15 year retrospective cohort study 2000 to**  
4 **2015**  
5  
6  
7

8 **Supplementary Material**  
9

10  
11 **Page 2 Appendix 1: Read & OXMIS codes denoting an HIV test used to identify patients who have**  
12 **ever had a HIV test recorded in primary care (Evans *et al* 2009<sup>26</sup>)**  
13

14  
15 **Page 3 Appendix 2: Read & OXMIS codes denoting HIV positive status used to identify HIV positive**  
16 **patients who have their HIV positive status recorded in primary care (Evans *et al* 2009<sup>26</sup>).**  
17

18  
19 **Page 4 Appendix 3: Pregnancy/Delivery/Abortion medcodes (Jackson *et al* <sup>50</sup>)**  
20  
21  
22  
23  
24  
25  
26  
27  
28  
29  
30  
31  
32  
33  
34  
35  
36  
37  
38  
39  
40  
41  
42  
43  
44  
45  
46  
47  
48  
49  
50  
51  
52  
53  
54  
55  
56  
57  
58  
59  
60

**Appendix 1: Read & OXMIS codes denoting an HIV test used to identify patients who have ever had a HIV test recorded in primary care (Evans *et al* 2009<sup>26</sup>)**

| Code    | READ/<br>OXMIS | Code description                                             | Certainty of<br>HIV+ test |
|---------|----------------|--------------------------------------------------------------|---------------------------|
| 6827.11 | READ           | HIV screening                                                | Definite                  |
| 43C..00 | READ           | HTLV-3 antibody test                                         | Definite                  |
| 43C..11 | READ           | Aids antibody test                                           | Definite                  |
| 43C..12 | READ           | Human immunodeficiency viral test                            | Definite                  |
| 43C1.00 | READ           | Blood sent for HTLV-3 serology                               | Definite                  |
| 43C2.00 | READ           | HTLV-3 antibody negative                                     | Definite                  |
| 43C2.11 | READ           | HIV negative                                                 | Definite                  |
| 43CZ.00 | READ           | HTLV-3 antibody NOS                                          | Definite                  |
| 43d5.00 | READ           | HIV antibody/antigen (Duo)                                   | Definite                  |
| 43d6.00 | READ           | HTLV 1 antibody level                                        | Ambiguous                 |
| 43dc.00 | READ           | HTLV 2 antibody level                                        | Ambiguous                 |
| 43h2.00 | READ           | HIV 1 PCR                                                    | Definite                  |
| 43j7.00 | READ           | HIV 1 nucleic acid detection                                 | Definite                  |
| 43V1.00 | READ           | Absolute CD4 count                                           | Definite                  |
| 43VE.00 | READ           | CD4/CD8 ratio                                                | Definite                  |
| 43VH.00 | READ           | Percentage CD4 count                                         | Definite                  |
| 43Vo.00 | READ           | Absolute CD4 (T4 cells) count                                | Definite                  |
| 43Vp.00 | READ           | Percentage CD4 (T4 cells) count                              | Definite                  |
| 43W7.00 | READ           | HIV1 antibody level                                          | Definite                  |
| 43W8.00 | READ           | HIV2 antibody level                                          | Definite                  |
| 43WK.00 | READ           | Human immunodeficiency virus antibody level                  | Definite                  |
| 4J34.00 | READ           | HIV viral load                                               | Definite                  |
| 4J35.00 | READ           | HIV p24 antigen level                                        | Definite                  |
| 4JDT.00 | READ           | HIV serology                                                 | Definite                  |
| 4JR7.00 | READ           | HIV screening test                                           | Definite                  |
| 62b..00 | READ           | Antenatal HIV screening                                      | Definite                  |
| 6827.00 | READ           | AIDS (HTLV-III) screening                                    | Definite                  |
| R109.00 | READ           | [D]Laboratory evidence of human immunodeficiency virus [HIV] | Definite                  |
| ZV01800 | READ           | [V]Human immunodeficiency virus - negative                   | Definite                  |
| ZV73700 | READ           | [V]Special screening exam for human immunodeficiency virus   | Definite                  |
| L1111PV | OXMIS          | HIV ANTIBODY TEST POSITIVE                                   | Definite                  |
| L 153P  | OXMIS          | HTVL-AIDS-III ANTIBODY TEST POSITIVE                         | Definite                  |
| L 153   | OXMIS          | HTVL-AIDS-III ANTIBODY TEST                                  | Definite                  |
| L1111NE | OXMIS          | HIV ANTIBODY TEST NEGATIVE                                   | Definite                  |
| L 153N  | OXMIS          | HTVL-AIDS-III ANTIBODY TEST NEGATIVE                         | Definite                  |
| 65VE.00 | READ           | Notification of AIDS                                         | Ambiguous                 |
| 43j8.00 | READ           | HTLV 1 nucleic acid detection                                | Ambiguous                 |

**Appendix 2: Read & OXMIS codes denoting HIV positive status used to identify HIV positive patients who have their HIV positive status recorded in primary care (Evans *et al* 2009<sup>26</sup>).**

| Code    | Read/OXMIS | Code description                                              | Certainty of HIV+ status |
|---------|------------|---------------------------------------------------------------|--------------------------|
| 65QA.00 | READ       | AIDS carrier                                                  | Definite                 |
| A789700 | READ       | HIV disease resulting other types of non-Hodgkin's lymphoma   | Definite                 |
| A789800 | READ       | HIV disease resulting in multiple malignant neoplasms         | Definite                 |
| A788.00 | READ       | Acquired immune deficiency syndrome                           | Definite                 |
| A788500 | READ       | Human immunodeficiency virus with secondary infection         | Definite                 |
| A788X00 | READ       | HIV disease resulting/unspcf infectious+parasitic disease     | Definite                 |
| A789200 | READ       | HIV disease resulting in candidiasis                          | Definite                 |
| A789500 | READ       | HIV disease resulting in Kaposi's sarcoma                     | Definite                 |
| AyuC100 | READ       | [X]HIV disease resulting in other viral infections            | Definite                 |
| AyuC700 | READ       | [X]HIV dis reslt/oth mal neopl/lymph,h'matopoetc+reltd tissu  | Definite                 |
| A788000 | READ       | Acute human immunodeficiency virus infection                  | Definite                 |
| A788100 | READ       | Asymptomatic human immunodeficiency virus infection           | Definite                 |
| A789300 | READ       | HIV disease resulting in Pneumocystis carinii pneumonia       | Definite                 |
| A789600 | READ       | HIV disease resulting in Burkitt's lymphoma                   | Definite                 |
| A798.00 | READ       | Retrovirus infection                                          | Definite                 |
| AyuC200 | READ       | [X]HIV disease resulting in other mycoses                     | Definite                 |
| AyuCA00 | READ       | [X]HIV disease resulting in multiple diseases CE              | Definite                 |
| A788U00 | READ       | HIV disease result/haematological+immunologic abnorms,NEC     | Definite                 |
| A789.00 | READ       | Human immunodef virus resulting in other disease              | Definite                 |
| AyuC000 | READ       | [X]HIV disease resulting in other bacterial infections        | Definite                 |
| AyuC800 | READ       | [X]HIV disease resulting in other malignant neoplasms         | Definite                 |
| 43C3.11 | READ       | HIV positive                                                  | Definite                 |
| A788y00 | READ       | Human immunodeficiency virus with other clinical findings     | Definite                 |
| Eu02400 | READ       | [X]Dementia in human immunodef virus [HIV] disease            | Definite                 |
| ZV01A00 | READ       | [V]Asymptomatic human immunodeficiency virus infection status | Definite                 |
| A789400 | READ       | HIV disease resulting in multiple infections                  | Definite                 |
| AyuC500 | READ       | [X]HIV disease resulting/unspcf infectious+parasitic disease  | Definite                 |
| AyuC900 | READ       | [X]HIV disease resulting in unspecified malignant neoplasm    | Definite                 |
| AyuCC00 | READ       | [X]HIV disease resulting in other specified conditions        | Definite                 |
| 43C3.00 | READ       | HTLV-3 antibody positive                                      | Definite                 |
| A788W00 | READ       | HIV disease resulting in unspecified malignant neoplasm       | Definite                 |
| A789X00 | READ       | HIV dis reslt/oth mal neopl/lymph,h'matopoetc+                | Definite                 |
| AyuC300 | READ       | [X]HIV disease resulting in multiple infections               | Definite                 |
| AyuC400 | READ       | [X]HIV disease resulting/other infectious+parasitic diseases  | Definite                 |
| AyuC600 | READ       | [X]HIV disease resulting in other non-Hodgkin's lymphoma      | Definite                 |
| A788600 | READ       | Human immunodeficiency virus with secondary cancers           | Definite                 |
| A788z00 | READ       | Acquired human immunodeficiency virus infection syndrome NOS  | Definite                 |
| A789A00 | READ       | HIV disease resulting in wasting syndrome                     | Definite                 |
| 65VE.00 | READ       | Notification of AIDS                                          | Definite                 |
| A788.11 | READ       | Human immunodeficiency virus infection                        | Definite                 |
| A788200 | READ       | HIV infection with persistent generalised lymphadenopathy     | Definite                 |
| A788300 | READ       | Human immunodeficiency virus with constitutional disease      | Definite                 |
| A788400 | READ       | Human immunodeficiency virus with neurological disease        | Definite                 |

**Appendix 2 (CONT'D): Read & OXMIS codes denoting HIV positive status used to identify HIV positive patients who have their HIV positive status recorded in primary care.**

| Code    | Read/OXMIS | Code description                                              | Certainty of HIV+ status |
|---------|------------|---------------------------------------------------------------|--------------------------|
| A788V00 | READ       | HIV disease resulting in multiple diseases CE                 | Definite                 |
| A789100 | READ       | HIV disease resulting in cytomegaloviral disease              | Definite                 |
| AyuC.00 | READ       | [X]Human immunodeficiency virus disease                       | Definite                 |
| AyuCD00 | READ       | [X]Unspecified human immunodeficiency virus [HIV] disease     | Definite                 |
| A789000 | READ       | HIV disease resulting in mycobacterial infection              | Definite                 |
| A789900 | READ       | HIV disease resulting in lymphoid interstitial pneumonitis    | Definite                 |
| AyuCB00 | READ       | [X]HIV disease result/haematological+immunologic abnorms,NEC  | Definite                 |
| R109.00 | READ       | [D]Laboratory evidence of human immunodeficiency virus [HIV]  | Definite                 |
| ZV01A00 | READ       | [V]Asymptomatic human immunodeficiency virus infection status | Definite                 |
| 799MD   | OXMIS      | AIDS                                                          | Definite                 |
| 799CA   | OXMIS      | AIDS CARRIER                                                  | Definite                 |
| L1111PV | OXMIS      | HIV ANTIBODY TEST POSITIVE                                    | Definite                 |
| L7990A  | OXMIS      | ACQUIRED IMMUNE DEFICIENCY SYNDROME                           | Definite                 |
| L 153P  | OXMIS      | HTVL-AIDS-III ANTIBODY TEST POSITIVE                          | Definite                 |
| 43V1.00 | READ       | Absolute CD4 count                                            | Ambiguous                |
| AyuD800 | READ       | [X]Retrovirus infections, not elsewhere classified            | Ambiguous                |
| AyuKM00 | READ       | [X]Retrovirus/cause of diseases classified to other chapters  | Ambiguous                |
| 43VE.00 | READ       | CD4/CD8 ratio                                                 | Ambiguous                |
| A7y0100 | READ       | Retrovirus as cause of diseases classified to other chapters  | Ambiguous                |
| 43VH.00 | READ       | Percentage CD4 count                                          | Ambiguous                |
| 4J34.00 | READ       | HIV viral load                                                | Ambiguous                |
| 4J35.00 | READ       | HIV p24 antigen level                                         | Ambiguous                |
| 43h2.00 | READ       | HIV 1 PCR                                                     | Ambiguous                |
| 43j7.00 | READ       | HIV 1 nucleic acid detection                                  | Ambiguous                |
| 43Vo.00 | READ       | Absolute CD4 (T4 cells) count                                 | Ambiguous                |
| 43Vp.00 | READ       | Percentage CD4 (T4 cells) count                               | Ambiguous                |

**Appendix 3: Pregnancy/Delivery/Abortion medcodes (Jackson *et al*<sup>50</sup>)**

| medcode | readcode | readterm                                   |
|---------|----------|--------------------------------------------|
| 52685   | ZV23000  | [V]Pregnancy with history of infertility   |
| 3030    | 4654     | Urine pregnancy test positive              |
| 73535   | L13z100  | Unspecified pregnancy vomiting - delivered |
| 53514   | Z22D300  | Uncertain viability of pregnancy           |
| 11422   | Z226.00  | Pregnancy problem                          |
| 20623   | ZV4J000  | [V]Problems related to unwanted pregnancy  |
| 99247   | L13y200  | Other pregnancy vomiting - not delivered   |
| 56451   | L13zz00  | Unspecified pregnancy vomiting NOS         |
| 14644   | L166z11  | UTI - urinary tract infection in pregnancy |
| 32975   | 6166     | Pregnant, diaphragm failure                |

|    |        |         |                                                              |
|----|--------|---------|--------------------------------------------------------------|
| 1  |        |         |                                                              |
| 2  |        |         |                                                              |
| 3  |        |         |                                                              |
| 4  | 23495  | L265.00 | Small-for-dates fetus in pregnancy                           |
| 5  | 3766   | L10..00 | Haemorrhage in early pregnancy                               |
| 6  | 56953  | Z235400 | Pendulous pregnant abdomen                                   |
| 7  | 40279  | 7E19012 | Fimbrial extraction of tubal pregnancy                       |
| 8  | 29122  | 7E19011 | Removal of ectopic pregnancy from fallopian tube             |
| 9  | 1748   | 7E08400 | Suction termination of pregnancy                             |
| 10 | 106170 | L21zz00 | Multiple pregnancy NOS                                       |
| 11 | 5357   | 7E08500 | Dilation of cervix and extraction termination of pregnancy   |
| 12 | 14899  | 621Z.00 | Patient pregnant NOS                                         |
| 13 | 61563  | L161300 | Oedema or excessive weight gain in pregnancy - not delivered |
| 14 | 64523  | L091z00 | Delayed/excess haemorrhage NOS following abortive pregnancy  |
| 15 | 20621  | ZV25313 | [V]Admission for termination of pregnancy                    |
| 16 | 20910  | ZV25311 | [V]Admission for termination of pregnancy (TOP)              |
| 17 | 70149  | L16A100 | Glycosuria during pregnancy - delivered                      |
| 18 | 54677  | L167200 | Liver disorder in pregnancy - not delivered                  |
| 19 | 102576 | L051711 | Incomplete termination of pregnancy                          |
| 20 | 36903  | 67AZ.00 | Pregnancy advice NOS                                         |
| 21 | 46448  | Q486.00 | Fetal death due to termination of pregnancy                  |
| 22 | 109697 | 6556    | Pertussis vaccination in pregnancy                           |
| 23 | 85961  | 44Cy.00 | Serum pregnancy associated plasma protein-A MoM measurement  |
| 24 | 20307  | L091.00 | Delayed/excessive haemorrhage following abortive pregnancy   |
| 25 | 37163  | L150z00 | Post-term pregnancy NOS                                      |
| 26 | 94473  | L211z00 | Triplet pregnancy NOS                                        |
| 27 | 47489  | Z22A800 | Undiagnosed pregnancy                                        |
| 28 | 1668   | L182500 | Iron deficiency anaemia of pregnancy                         |
| 29 | 61576  | L211000 | Triplet pregnancy unspecified                                |
| 30 | 25501  | Z22A100 | Low risk pregnancy                                           |
| 31 | 40633  | Z22A600 | Teenage pregnancy                                            |
| 32 | 104440 | 4Q3N.00 | Pregnancy associated plasma protein A level                  |
| 33 | 45413  | L263A11 | Maternal care for reduced fetal heart rate during pregnancy  |
| 34 | 14994  | 6174    | Pregnant, sheath failure                                     |
| 35 | 24170  | L15..00 | Prolonged or post-term pregnancy                             |
| 36 | 66390  | Q0z..00 | Maternal problem unrelated preg affecting fetus/neonate NOS  |
| 37 | 27833  | L13y.00 | Other pregnancy vomiting                                     |
| 38 | 55338  | L123000 | Transient hypertension of pregnancy unspecified              |
| 39 | 99956  | L168400 | Fatigue during pregnancy with postnatal complication         |
| 40 | 71314  | L093.00 | Renal failure following abortive pregnancy                   |
| 41 | 106735 | 9mK0.00 | Pertussis vaccination in pregnancy invitation first letter   |
| 42 | 31449  | 6294    | No A/N care: not known preg.                                 |
| 43 | 100670 | L181100 | Thyroid dysfunction during pregnancy - baby delivered        |
| 44 | 54866  | L030.00 | Abdominal pregnancy                                          |
| 45 | 38882  | L123600 | Transient hypertension of pregnancy                          |
| 46 | 61995  | L03yz00 | Other ectopic pregnancy NOS                                  |
| 47 | 5044   | 13H7.00 | Unwanted pregnancy                                           |
| 48 | 25131  | Z22AD11 | Reported conception - pregnancy                              |
| 49 |        |         |                                                              |
| 50 |        |         |                                                              |
| 51 |        |         |                                                              |
| 52 |        |         |                                                              |
| 53 |        |         |                                                              |
| 54 |        |         |                                                              |
| 55 |        |         |                                                              |
| 56 |        |         |                                                              |
| 57 |        |         |                                                              |
| 58 |        |         |                                                              |
| 59 |        |         |                                                              |
| 60 |        |         |                                                              |

|    |        |         |                                                              |
|----|--------|---------|--------------------------------------------------------------|
| 1  |        |         |                                                              |
| 2  |        |         |                                                              |
| 3  |        |         |                                                              |
| 4  | 21467  | L03y200 | Membranous pregnancy                                         |
| 5  | 48304  | L10z200 | Early pregnancy haemorrhage NOS - not delivered              |
| 6  | 37693  | 13Hd.00 | Teenage pregnancy                                            |
| 7  | 27980  | L166700 | Infections of the genital tract in pregnancy                 |
| 8  | 2638   | L1...00 | Pregnancy complications                                      |
| 9  | 99933  | L092100 | Bowel damage following abortive pregnancy                    |
| 10 | 41122  | L10zz00 | Early pregnancy haemorrhage NOS                              |
| 11 | 37348  | Lyu2500 | [X]Other specified pregnancy-related conditions              |
| 12 | 96757  | L411513 | Vulval varices in pregnancy                                  |
| 13 | 59634  | L411512 | Vaginal varices in pregnancy                                 |
| 14 | 99237  | L411511 | Perineal varices in pregnancy                                |
| 15 | 27451  | L166000 | Genitourinary tract infection in pregnancy unspecified       |
| 16 | 110129 | 6556000 | Pertussis vacc in pregnancy given by other healthcre providr |
| 17 | 107485 | Q014000 | Fetus or neonate affected by unspecified ectopic pregnancy   |
| 18 | 18258  | L167.00 | Liver disorder in pregnancy                                  |
| 19 | 42015  | L16y.00 | Other pregnancy complications                                |
| 20 | 25028  | L09z.00 | Complication NOS following abortion/ectopic/molar pregnancy  |
| 21 | 44734  | 62O8.00 | Pregnancy prolonged - 42 weeks                               |
| 22 | 23831  | ZV22y00 | [V]Other specified pregnant state                            |
| 23 | 41587  | L210z00 | Twin pregnancy NOS                                           |
| 24 | 24063  | 62O7.00 | Pregnancy prolonged - 41 weeks                               |
| 25 | 44650  | L0y..00 | Other specified pregnancy with abortive outcome              |
| 26 | 61284  | L210200 | Twin pregnancy with antenatal problem                        |
| 27 | 54288  | Z22D311 | Query viability of pregnancy                                 |
| 28 | 34938  | L212.00 | Quadruplet pregnancy                                         |
| 29 | 102494 | 8Hh3.00 | Self referral to termination of pregnancy service            |
| 30 | 1686   | 7E08600 | Termination of pregnancy NEC                                 |
| 31 | 70214  | L21z100 | Multiple pregnancy NOS - delivered                           |
| 32 | 64247  | Z235.00 | Observation of shape of pregnant abdomen                     |
| 33 | 23751  | L266.00 | Large-for-dates fetus in pregnancy                           |
| 34 | 39359  | L385.00 | Failed or difficult intubation during pregnancy              |
| 35 | 64500  | L183.11 | Pregnancy and drug dependence                                |
| 36 | 73917  | L10y200 | Other haemorrhage in early pregnancy - not delivered         |
| 37 | 255    | L05..12 | Termination of pregnancy                                     |
| 38 | 15433  | L21..00 | Multiple pregnancy                                           |
| 39 | 20439  | L123.00 | Transient hypertension of pregnancy                          |
| 40 | 16775  | L16E.00 | Pregnancy pruritus                                           |
| 41 | 53921  | L161000 | Oedema or excessive weight gain in pregnancy, unspecified    |
| 42 | 44770  | L191.00 | Continuing pregnancy after abortion of one fetus or more     |
| 43 | 29205  | 4453    | Serum pregnancy test positive                                |
| 44 | 46577  | 66AX.00 | Diabetes: shared care in pregnancy - diabetol and obstet     |
| 45 | 73455  | Q015200 | Fetus or neonate affected by triplet pregnancy               |
| 46 | 41625  | L13yz00 | Other pregnancy vomiting NOS                                 |
| 47 | 60345  | M240500 | Alopecia of pregnancy                                        |
| 48 | 107957 | 115V.00 | No history of ectopic pregnancy                              |
| 49 |        |         |                                                              |
| 50 |        |         |                                                              |
| 51 |        |         |                                                              |
| 52 |        |         |                                                              |
| 53 |        |         |                                                              |
| 54 |        |         |                                                              |
| 55 |        |         |                                                              |
| 56 |        |         |                                                              |
| 57 |        |         |                                                              |
| 58 |        |         |                                                              |
| 59 |        |         |                                                              |
| 60 |        |         |                                                              |



|    |        |         |                                                              |
|----|--------|---------|--------------------------------------------------------------|
| 1  |        |         |                                                              |
| 2  |        |         |                                                              |
| 3  | 6580   | ZV23800 | [V]Supervision of high-risk pregnancy due to social problems |
| 4  | 61182  | L211100 | Triplet pregnancy - delivered                                |
| 5  | 30365  | Z22AA00 | Wanted pregnancy                                             |
| 6  | 26852  | ZV23400 | [V]Pregnancy with other poor obstetric history               |
| 7  | 30817  | 6212    | Pregnant - blood test confirms                               |
| 8  | 72014  | L212z00 | Quadruplet pregnancy NOS                                     |
| 9  | 12521  | L161.11 | Excessive weight gain in pregnancy                           |
| 10 | 41959  | L171300 | Maternal gonorrhoea in pregnancy - baby not yet delivered    |
| 11 | 26201  | Z22AC00 | Pregnancy with uncertain dates                               |
| 12 | 49519  | Z229.00 | Observation of position of pregnancy                         |
| 13 | 107713 | L21y200 | Other multiple pregnancy with antenatal problem              |
| 14 | 36235  | 67A4.00 | Pregnancy exercise advice                                    |
| 15 | 105511 | L21z.00 | Multiple pregnancy NOS                                       |
| 16 | 65783  | L030000 | Delivery of viable fetus in abdominal pregnancy              |
| 17 | 106267 | L03y300 | Combined or heterotopic pregnancy                            |
| 18 | 2278   | 8M6..00 | Requests pregnancy termination                               |
| 19 | 110448 | Lyu0.00 | [X]Pregnancy with abortive outcome                           |
| 20 | 99006  | Q014100 | Fetus or neonate affected by abdominal ectopic pregnancy     |
| 21 | 40357  | L2D..00 | Retained intrauterine contraceptive device in pregnancy      |
| 22 | 54293  | Q015.00 | Fetus or neonate affected by multiple pregnancy              |
| 23 | 22557  | Z22B100 | Single pregnancy                                             |
| 24 | 15338  | 621A.00 | Pregnancy unplanned ? wanted                                 |
| 25 | 6649   | L166800 | Urinary tract infection complicating pregnancy               |
| 26 | 49855  | Q015100 | Fetus or neonate affected by twin pregnancy                  |
| 27 | 40825  | Z22B800 | Undiagnosed multiple pregnancy                               |
| 28 | 35509  | 624..00 | A/N care: precious pregnancy                                 |
| 29 | 20197  | L211.00 | Triplet pregnancy                                            |
| 30 | 46270  | ZV22z00 | [V]Unspecified pregnant state                                |
| 31 | 67098  | L183300 | Drug dependence during pregnancy - baby not yet delivered    |
| 32 | 23373  | L150.00 | Post-term pregnancy                                          |
| 33 | 1357   | L210100 | Twin pregnancy - delivered                                   |
| 34 | 45729  | Z22D.00 | Observation of viability of pregnancy                        |
| 35 | 44733  | L0z..00 | Pregnancy with abortive outcome NOS                          |
| 36 | 11760  | L13z.00 | Unspecified pregnancy vomiting                               |
| 37 | 18500  | Z22D100 | Viable pregnancy                                             |
| 38 | 69686  | L417000 | Cerebral venous thrombosis in pregnancy                      |
| 39 | 53661  | L13z200 | Unspecified pregnancy vomiting - not delivered               |
| 40 | 22183  | 957..11 | Prescription exempt form-preg                                |
| 41 | 106378 | 9mK..00 | Pertussis vaccination in pregnancy invitation                |
| 42 | 12230  | L263900 | Maternal care for fetal tachycardia during pregnancy         |
| 43 | 22193  | Z229100 | Intrauterine pregnancy                                       |
| 44 | 15061  | L13..12 | Hyperemesis of pregnancy                                     |
| 45 | 14877  | 621B.00 | Pregnant - ? planned                                         |
| 46 | 27672  | 7E13100 | Excision of ectopic ovarian pregnancy                        |
| 47 | 1744   | L03..00 | Ectopic pregnancy                                            |
| 48 |        |         |                                                              |
| 49 |        |         |                                                              |
| 50 |        |         |                                                              |
| 51 |        |         |                                                              |
| 52 |        |         |                                                              |
| 53 |        |         |                                                              |
| 54 |        |         |                                                              |
| 55 |        |         |                                                              |
| 56 |        |         |                                                              |
| 57 |        |         |                                                              |
| 58 |        |         |                                                              |
| 59 |        |         |                                                              |
| 60 |        |         |                                                              |

|    |        |         |                                                              |
|----|--------|---------|--------------------------------------------------------------|
| 1  |        |         |                                                              |
| 2  |        |         |                                                              |
| 3  |        |         |                                                              |
| 4  | 5693   | L16A.00 | Glycosuria during pregnancy                                  |
| 5  | 36394  | L16C.00 | Pregnancy induced oedema+proteinuria without hypertension    |
| 6  | 73914  | L412511 | Thrombophlebitis of legs in pregnancy                        |
| 7  | 53849  | L16y000 | Other pregnancy complication unspecified                     |
| 8  |        |         |                                                              |
| 9  | 105943 | L165300 | Asymptomatic bacteriuria in pregnancy - not delivered        |
| 10 | 36421  | L167z00 | Liver disorder in pregnancy NOS                              |
| 11 | 25872  | L16yz00 | Other pregnancy complication NOS                             |
| 12 | 60309  | Q0y..00 | Maternal problems unrelated preg affecting fetus/neonate OS  |
| 13 | 67728  | L150200 | Post-term pregnancy - not delivered                          |
| 14 | 28103  | Z22A300 | Concealed pregnancy                                          |
| 15 | 21849  | L031.00 | Tubal pregnancy                                              |
| 16 |        |         |                                                              |
| 17 | 54577  | L210000 | Twin pregnancy unspecified                                   |
| 18 | 105654 | L10y100 | Other haemorrhage in early pregnancy - delivered             |
| 19 | 53685  | L410500 | Varicose veins of legs in pregnancy                          |
| 20 | 68930  | L168100 | Fatigue during pregnancy - delivered                         |
| 21 | 68840  | L416200 | Haemorrhoids in pregnancy and puerperium - deliv + p/n comp  |
| 22 | 53167  | L188300 | Abnormal GTT during pregnancy - baby not yet delivered       |
| 23 | 45862  | 7E07114 | Curettage of uterus for termination of pregnancy NEC         |
| 24 | 64366  | L412500 | Superficial thrombophlebitis in pregnancy                    |
| 25 | 13968  | 584D.00 | Antenatal ultrasound confirms intra-uterine pregnancy        |
| 26 | 14925  | L10z.00 | Early pregnancy haemorrhage NOS                              |
| 27 | 61935  | L185.11 | Congenital heart disease in pregnancy                        |
| 28 | 103059 | 7E07111 | Curettage of term pregnancy NEC                              |
| 29 | 16384  | 7E07113 | Curettage of uterus for termination of pregnancy NEC         |
| 30 | 23421  | 615C.00 | IUD failure - pregnant                                       |
| 31 | 3029   | L166500 | Infections of kidney in pregnancy                            |
| 32 | 106517 | L176100 | Other maternal viral disease in pregnancy - baby delivered   |
| 33 | 40964  | L192.00 | Continuing preg after intrauterine death one fetus or more   |
| 34 | 1850   | 7F06012 | Shirodkar suture in pregnancy                                |
| 35 | 30302  | 7F...12 | Pregnancy operations                                         |
| 36 | 28107  | L161.00 | Oedema or excessive weight gain in pregnancy no hypertension |
| 37 | 85960  | 44Cz.00 | Plasma pregnancy associated plasma protein-A MoM             |
| 38 | 44057  | ZV23111 | [V]Pregnancy with history of hydatidiform mole               |
| 39 | 37573  | Z22B900 | Continuing pregnancy after abortion of sibling fetus         |
| 40 | 68694  | Z22C.00 | Observation of measures of pregnancy                         |
| 41 | 49559  | L180300 | Diabetes mellitus during pregnancy - baby not yet delivered  |
| 42 | 29786  | L416600 | Haemorrhoids in pregnancy                                    |
| 43 | 57059  | L187300 | Orthopaedic disorder in pregnancy - baby not yet delivered   |
| 44 | 23334  | L162.11 | Albuminuria in pregnancy without hypertension                |
| 45 | 92579  | L162.13 | Uraemia in pregnancy without hypertension                    |
| 46 | 38312  | L162.12 | Nephropathy NOS in pregnancy without hypertension            |
| 47 | 22215  | Z22A200 | High risk pregnancy                                          |
| 48 | 38346  | ZV22000 | [V]First normal pregnancy supervision                        |
| 49 | 15318  | 6214    | Pregnant - on history                                        |
| 50 | 41504  | L13y000 | Other pregnancy vomiting unspecified                         |
| 51 |        |         |                                                              |
| 52 |        |         |                                                              |
| 53 |        |         |                                                              |
| 54 |        |         |                                                              |
| 55 |        |         |                                                              |
| 56 |        |         |                                                              |
| 57 |        |         |                                                              |
| 58 |        |         |                                                              |
| 59 |        |         |                                                              |
| 60 |        |         |                                                              |

|    |        |         |                                                              |
|----|--------|---------|--------------------------------------------------------------|
| 1  |        |         |                                                              |
| 2  |        |         |                                                              |
| 3  |        |         |                                                              |
| 4  | 72019  | L132200 | Late pregnancy vomiting - not delivered                      |
| 5  | 37386  | 8B68.00 | Pregnancy prophylactic therapy                               |
| 6  | 60877  | L263800 | Maternal care for fetal decelerations during pregnancy       |
| 7  | 107225 | L165z00 | Asymptomatic bacteriuria in pregnancy NOS                    |
| 8  | 54942  | L123100 | Transient hypertension of pregnancy - delivered              |
| 9  | 54701  | ZV23y00 | [V]Other specified high-risk pregnancy                       |
| 10 | 63825  | Q014.00 | Fetus or neonate affected by ectopic pregnancy               |
| 11 | 94804  | 67AB.00 | Preg. prescription exempt adv.                               |
| 12 | 72835  | Q01z.00 | Fetus/neonate affected by maternal complic pregnancy NOS     |
| 13 | 99008  | Q014300 | Fetus or neonate affected by tubal ectopic pregnancy         |
| 14 | 110868 | L181000 | Thyroid dysfunction - unspec whether in pregnancy/puerperium |
| 15 | 66649  | L41z500 | Venous complication of pregnancy, unspecified                |
| 16 | 26286  | L18A000 | Cholestasis of pregnancy                                     |
| 17 | 17947  | 62a..00 | Pregnancy review                                             |
| 18 | 103104 | L176300 | Other maternal viral dis.in pregnancy-baby not yet delivered |
| 19 | 109932 | Z235211 | Globular pregnant abdomen                                    |
| 20 | 68004  | Q01..00 | Fetus/neonate affected by maternal complication of pregnancy |
| 21 | 20240  | 6216    | Pregnant - planned                                           |
| 22 | 65834  | ZV23200 | [V]Pregnancy with history of abortion                        |
| 23 | 7916   | Z254500 | Delivered by caesarean section - pregnancy at term           |
| 24 | 21119  | L182300 | Anaemia during pregnancy - baby not yet delivered            |
| 25 | 9408   | L10y.11 | Bleeding in early pregnancy                                  |
| 26 | 64099  | L168000 | Fatigue during pregnancy unspecified                         |
| 27 | 10278  | L180800 | Diabetes mellitus arising in pregnancy                       |
| 28 | 2602   | L166.11 | Cystitis of pregnancy                                        |
| 29 | 13165  | 621..00 | Patient currently pregnant                                   |
| 30 | 9986   | Z212.11 | Pregnancy care                                               |
| 31 | 66594  | L186.11 | Heart disease during pregnancy                               |
| 32 | 35158  | Z225.00 | Normal pregnancy                                             |
| 33 | 93800  | Z235100 | Ovoid pregnant abdomen                                       |
| 34 | 73727  | L168z00 | Fatigue during pregnancy NOS                                 |
| 35 | 55889  | L175300 | Maternal rubella during pregnancy - baby not yet delivered   |
| 36 | 7517   | 621C.00 | Unplanned pregnancy                                          |
| 37 | 53908  | Lyu0000 | [X]Other ectopic pregnancy                                   |
| 38 | 34173  | L12B.00 | Proteinuric hypertension of pregnancy                        |
| 39 | 35514  | 624Z.00 | A/N care: precious preg. NOS                                 |
| 40 | 15065  | 8B7..11 | Pregnancy vitamin/iron prophyl                               |
| 41 | 109465 | L184300 | Mental disorder during pregnancy - baby not yet delivered    |
| 42 | 24038  | 13S..00 | Pregnancy benefits                                           |
| 43 | 16215  | 6211    | Pregnant - urine test confirms                               |
| 44 | 35592  | 6213    | Pregnant - V.E. confirms                                     |
| 45 | 25254  | Z21..00 | Care relating to reproduction and pregnancy                  |
| 46 | 46609  | Z22C800 | Number of lost pregnancies                                   |
| 47 | 29692  | 615C.11 | Pregnant, IUD failure                                        |
| 48 | 50440  | Z22A500 | Biochemical pregnancy                                        |
| 49 |        |         |                                                              |
| 50 |        |         |                                                              |
| 51 |        |         |                                                              |
| 52 |        |         |                                                              |
| 53 |        |         |                                                              |
| 54 |        |         |                                                              |
| 55 |        |         |                                                              |
| 56 |        |         |                                                              |
| 57 |        |         |                                                              |
| 58 |        |         |                                                              |
| 59 |        |         |                                                              |
| 60 |        |         |                                                              |

|    |        |         |                                                       |
|----|--------|---------|-------------------------------------------------------|
| 1  |        |         |                                                       |
| 2  |        |         |                                                       |
| 3  |        |         |                                                       |
| 4  | 56252  | ZV22100 | [V]Other normal pregnancy supervision                 |
| 5  | 21196  | ZV23.00 | [V]High-risk pregnancy supervision                    |
| 6  | 30618  | Z22AB00 | Unplanned pregnancy                                   |
| 7  | 10775  | 8B74.00 | Iron supplement in pregnancy                          |
| 8  | 48534  | ZV23100 | [V]Pregnancy with history of trophoblastic disease    |
| 9  | 73559  | L13z000 | Unspecified pregnancy vomiting unspecified            |
| 10 | 13984  | 584E.00 | Antenatal ultrasound confirms ectopic pregnancy       |
| 11 | 9754   | Z22A400 | Early stage of pregnancy                              |
| 12 | 67893  | L2C..00 | Malnutrition in pregnancy                             |
| 13 | 70993  | L16Az00 | Glycosuria during pregnancy NOS                       |
| 14 | 23438  | L2z..00 | Risk factors in pregnancy NOS                         |
| 15 | 105694 | ZVu2300 | [X]Supervision of other normal pregnancy              |
| 16 | 53097  | Z22C313 | Duration of pregnancy                                 |
| 17 | 58156  | L03y.00 | Other ectopic pregnancy                               |
| 18 | 55730  | ZV22.11 | [V]Supervision of normal pregnancy                    |
| 19 | 5709   | 62...13 | Pregnancy care                                        |
| 20 | 100104 | 95B..00 | Health in Pregnancy grant claim form issued           |
| 21 | 72883  | Lyu2100 | [X]Other vomiting complicating pregnancy              |
| 22 | 59588  | L411500 | Genital varices in pregnancy                          |
| 23 | 67863  | Z22B.00 | Observation of quantity of pregnancy                  |
| 24 | 12890  | Z227.00 | Confirmation of pregnancy                             |
| 25 | 47080  | L162.00 | Unspecified renal disease in pregnancy                |
| 26 | 3191   | L16y500 | Abdominal pain in pregnancy                           |
| 27 | 27740  | L16..00 | Other pregnancy complication NEC                      |
| 28 | 67698  | L150000 | Post-term pregnancy unspecified                       |
| 29 | 29623  | 62H4.00 | Rh screen - 2nd preg. sample                          |
| 30 | 21438  | 7E08411 | Vacuum termination of pregnancy                       |
| 31 | 51298  | 6215    | Pregnant - on abdom. palpation                        |
| 32 | 35912  | ZV22200 | [V]Pregnancy confirmed                                |
| 33 | 99980  | L168300 | Fatigue during pregnancy - not delivered              |
| 34 | 29593  | 6223    | Antenatal care: 3rd pregnancy                         |
| 35 | 49407  | L2B..00 | Low weight gain in pregnancy                          |
| 36 | 52583  | L168.00 | Fatigue during pregnancy                              |
| 37 | 69599  | L21y.00 | Other multiple pregnancy                              |
| 38 | 39117  | L126500 | Eclampsia in pregnancy                                |
| 39 | 863    | L398200 | Caesarean section - pregnancy at term                 |
| 40 | 90776  | 62a..11 | Review of pregnancy                                   |
| 41 | 91254  | Z235200 | Rounded pregnant abdomen                              |
| 42 | 109416 | 62H5.00 | Rh screen - 3rd preg. sample                          |
| 43 | 69815  | 62H3.00 | Rh screen - 1st preg. sample                          |
| 44 | 11989  | 8HHV.00 | Referral for termination of pregnancy                 |
| 45 | 37701  | Z22A.00 | Observation of pattern of pregnancy                   |
| 46 | 33441  | L511.00 | Maternal care for viable fetus in abdominal pregnancy |
| 47 | 106957 | 9Nif.00 | Did not attend pertussis vaccination in pregnancy     |
| 48 | 24603  | L10y.00 | Other haemorrhage in early pregnancy                  |
| 49 |        |         |                                                       |
| 50 |        |         |                                                       |
| 51 |        |         |                                                       |
| 52 |        |         |                                                       |
| 53 |        |         |                                                       |
| 54 |        |         |                                                       |
| 55 |        |         |                                                       |
| 56 |        |         |                                                       |
| 57 |        |         |                                                       |
| 58 |        |         |                                                       |
| 59 |        |         |                                                       |
| 60 |        |         |                                                       |

|    |        |         |                                                             |
|----|--------|---------|-------------------------------------------------------------|
| 1  |        |         |                                                             |
| 2  |        |         |                                                             |
| 3  |        |         |                                                             |
| 4  | 47608  | L177.00 | Infections of bladder in pregnancy                          |
| 5  | 63751  | L16A300 | Glycosuria during pregnancy - not delivered                 |
| 6  | 15418  | L166300 | Genitourinary tract infection in pregnancy - not delivered  |
| 7  | 59313  | Z22BA00 | Contin pregnancy after intrauterine death of sibling fetus  |
| 8  | 69722  | ZV23z00 | [V]Unspecified high-risk pregnancy                          |
| 9  | 14842  | 6217    | Pregnant - unplanned - wanted                               |
| 10 | 42614  | Z22..00 | Pregnancy observations                                      |
| 11 | 53490  | L178.00 | Infections of urethra in pregnancy                          |
| 12 | 43344  | ZV61800 | [V]Illegitimate pregnancy                                   |
| 13 | 10173  | Z23D200 | Pregnant abdomen observation                                |
| 14 | 52685  | ZV23000 | [V]Pregnancy with history of infertility                    |
| 15 | 50512  | L031z00 | Tubal pregnancy NOS                                         |
| 16 | 49502  | L228.00 | Multiple pregnancy with malpresentation                     |
| 17 | 50058  | 13SZ.00 | Pregnancy benefit NOS                                       |
| 18 | 69011  | L132000 | Late pregnancy vomiting unspecified                         |
| 19 | 10185  | L13..00 | Excessive pregnancy vomiting                                |
| 20 | 10184  | 67A3.00 | Pregnancy smoking advice                                    |
| 21 | 97349  | L121300 | Renal hypertension in preg/childbirth/puerp - not delivered |
| 22 | 101518 | L132z00 | Late pregnancy vomiting NOS                                 |
| 23 | 71730  | L123300 | Transient hypertension of pregnancy - not delivered         |
| 24 | 31162  | L165.00 | Asymptomatic bacteriuria in pregnancy                       |
| 25 | 52048  | Z22AB11 | Accidental pregnancy                                        |
| 26 | 54938  | L162000 | Unspecified renal disease in pregnancy unspecified          |
| 27 | 62358  | L167000 | Liver disorder in pregnancy unspecified                     |
| 28 | 110888 | 67lt.00 | Advice on risk harm to mother from maternl medictn dur preg |
| 29 | 38771  | Lyu2200 | [X]Other venous complications in pregnancy                  |
| 30 | 15634  | L166z00 | Genitourinary tract infection in pregnancy NOS              |
| 31 | 43000  | L16D.00 | Excessive weight gain in pregnancy                          |
| 32 | 14651  | 13H8.00 | Illegitimate pregnancy                                      |
| 33 | 108236 | 621D.00 | Concealed pregnancy                                         |
| 34 | 15033  | ZV61900 | [V]Other unwanted pregnancy                                 |
| 35 | 67164  | L18z300 | Medical condition NOS in pregnancy - baby not yet delivered |
| 36 | 93303  | ZV22400 | [V]Supervision of other normal pregnancy                    |
| 37 | 6184   | ZV22.00 | [V]Normal pregnancy                                         |
| 38 | 48281  | Z22D200 | Non-viable pregnancy                                        |
| 39 | 29746  | 8B75.00 | Vitamin supplement - pregnancy                              |
| 40 | 16611  | ZV22300 | [V]Pregnant state, incidental                               |
| 41 | 1130   | L210.00 | Twin pregnancy                                              |
| 42 | 52221  | L03y000 | Cervical pregnancy                                          |
| 43 | 59650  | Z235300 | Transversely enlarged pregnant abdomen                      |
| 44 | 69327  | L10yz00 | Other haemorrhage in early pregnancy NOS                    |
| 45 | 51956  | L212200 | Quadruplet pregnancy with antenatal problem                 |
| 46 | 10306  | Z22C314 | Weeks pregnant                                              |
| 47 | 45965  | Z22C311 | Pregnancy duration                                          |
| 48 | 26055  | L263A00 | Maternal care for fetal bradycardia during pregnancy        |
| 49 |        |         |                                                             |
| 50 |        |         |                                                             |
| 51 |        |         |                                                             |
| 52 |        |         |                                                             |
| 53 |        |         |                                                             |
| 54 |        |         |                                                             |
| 55 |        |         |                                                             |
| 56 |        |         |                                                             |
| 57 |        |         |                                                             |
| 58 |        |         |                                                             |
| 59 |        |         |                                                             |
| 60 |        |         |                                                             |

|    |        |         |                                                                |
|----|--------|---------|----------------------------------------------------------------|
| 1  |        |         |                                                                |
| 2  |        |         |                                                                |
| 3  |        |         |                                                                |
| 4  | 61301  | L10y000 | Other haemorrhage in early pregnancy unspecified               |
| 5  | 10261  | L2...00 | Risk factors in pregnancy                                      |
| 6  | 106268 | 8IEc.00 | Pertussis vaccination in pregnancy declined                    |
| 7  | 24944  | L163300 | Pregnancy care of habitual aborter                             |
| 8  |        |         |                                                                |
| 9  | 20118  | 62O..12 | Static weight gain pregnancy                                   |
| 10 | 58142  | L16A000 | Glycosuria during pregnancy unspecified                        |
| 11 | 61835  | L161z00 | Oedema or excessive weight gain in pregnancy NOS               |
| 12 | 23995  | L15..11 | Post-term pregnancy                                            |
| 13 |        |         |                                                                |
| 14 | 35646  | L123z00 | Transient hypertension of pregnancy NOS                        |
| 15 | 93895  | Z22B500 | Quintuplet pregnancy                                           |
| 16 | 65256  | L164.00 | Peripheral neuritis in pregnancy                               |
| 17 |        |         |                                                                |
| 18 | 67975  | L166.00 | Genitourinary tract infections in pregnancy                    |
| 19 | 36006  | L16z.00 | Pregnancy complication NOS                                     |
| 20 | 61466  | Z22A211 | HRP - High risk pregnancy                                      |
| 21 | 26866  | L2y..00 | Other specified risk factors in pregnancy                      |
| 22 |        |         |                                                                |
| 23 | 35855  | L15z.00 | Prolonged pregnancy NOS                                        |
| 24 | 2937   | L175.11 | Rubella contact in pregnancy                                   |
| 25 | 50421  | Z22A900 | Unwanted pregnancy                                             |
| 26 |        |         |                                                                |
| 27 | 37048  | 6282    | A/N care:10yrs+since last preg                                 |
| 28 | 49193  | 67A7.11 | Care of teeth advice -in preg.                                 |
| 29 | 11986  | 7E13300 | Excision of ruptured ectopic tubal pregnancy                   |
| 30 | 97034  | 67AE.00 | Folic acid advice in first trimester of pregnancy              |
| 31 |        |         |                                                                |
| 32 | 106737 | 9mK2.00 | Pertussis vaccination in pregnancy invitation third letter     |
| 33 | 102362 | 389B.00 | Assessment for termination of pregnancy                        |
| 34 | 55618  | ZV23600 | [V]Supervise/pregnancy wth history insufficient antenatal care |
| 35 |        |         |                                                                |
| 36 | 37038  | Z23D100 | Girth of pregnant abdomen                                      |
| 37 | 29631  | 6222    | Antenatal care: 2nd pregnancy                                  |
| 38 | 65555  | L132.00 | Late vomiting of pregnancy                                     |
| 39 | 107698 | Z236300 | Pregnant uterus displaced laterally                            |
| 40 |        |         |                                                                |
| 41 | 4536   | 621..11 | Pregnancy confirmed                                            |
| 42 | 111540 | L415500 | Other phlebitis in pregnancy                                   |
| 43 | 32493  | Z22AD00 | Presentation of pregnancy                                      |
| 44 | 44729  | L031000 | Fallopian tube pregnancy                                       |
| 45 | 43140  | 67A2.00 | Diet in pregnancy advice                                       |
| 46 | 91888  | L181300 | Thyroid dysfunction in pregnancy - baby not yet delivered      |
| 47 | 12837  | 7F2B100 | Ultrasound monitoring of early pregnancy                       |
| 48 |        |         |                                                                |
| 49 | 30351  | 67A6.00 | Drugs in pregnancy advice                                      |
| 50 |        |         |                                                                |
| 51 | 15567  | 6218    | Pregnant -unplanned-not wanted                                 |
| 52 | 33724  | L03z.00 | Ectopic pregnancy NOS                                          |
| 53 |        |         |                                                                |
| 54 | 100892 | Lyu2400 | [X]Other+unspcf genitourinary tract infection in pregnancy     |
| 55 | 127    | 62...00 | Patient pregnant                                               |
| 56 | 13672  | 8HHf.00 | Refer to early pregnancy unit                                  |
| 57 | 32073  | L0...00 | Pregnancy with abortive outcome                                |
| 58 | 64292  | L16y300 | Other pregnancy complication - not delivered                   |
| 59 |        |         |                                                                |
| 60 | 106425 | 62NL.00 | Antenatal 31 week examination                                  |

|    |        |         |                                                              |
|----|--------|---------|--------------------------------------------------------------|
| 1  |        |         |                                                              |
| 2  |        |         |                                                              |
| 3  |        |         |                                                              |
| 4  | 109543 | L332200 | Cord tangled with compression with antenatal problem         |
| 5  | 102300 | Lyu2A00 | [X]Abnormal finding on antenatal screening of mother         |
| 6  | 111263 | L230200 | Disproportion - major pelvic abnormality with antenatal prob |
| 7  | 55111  | 6B22.00 | Sure Start antenatal visit                                   |
| 8  | 13418  | 62W..00 | Antenatal blood tests                                        |
| 9  | 61533  | L270200 | Polyhydramnios with antenatal problem                        |
| 10 | 14085  | 62GB.00 | Antenatal ultrasounds scan at 4-8 weeks                      |
| 11 | 42326  | 62KZ.00 | Antenatal syphilis screen NOS                                |
| 12 | 18536  | 62b..00 | Antenatal HIV screening                                      |
| 13 | 99475  | 68b5.00 | Antenatal screening result pending                           |
| 14 | 13168  | 62NZ.00 | Antenatal examination NOS                                    |
| 15 | 63448  | Z675.00 | Antenatal class                                              |
| 16 | 100596 | 68b3.00 | Antenatal screening shows significant disorder               |
| 17 | 67926  | ZV28z00 | [V]Unspecified antenatal screening                           |
| 18 | 16613  | 584C.00 | Antenatal ultrasound result received                         |
| 19 | 23667  | L413.00 | Antenatal deep vein thrombosis                               |
| 20 | 53683  | L452300 | Obstetric nonpurulent mastitis with antenatal complication   |
| 21 | 104764 | L236200 | Hydrocephalic disproportion with antenatal problem           |
| 22 | 56967  | 9NV1.00 | Antenatal clinic                                             |
| 23 | 13417  | 62K..00 | Antenatal syphilis screen                                    |
| 24 | 108099 | L39z300 | Complications of labour and delivery NOS with antenatal prob |
| 25 | 70096  | L224200 | Transverse lie with antenatal problem                        |
| 26 | 104359 | ZVu2600 | [X]Other antenatal screening based on amniocentesis          |
| 27 | 294    | 62...11 | Antenatal care                                               |
| 28 | 104178 | Lyu2600 | [X]Other abnormal findings on antenatal screening of mother  |
| 29 | 27056  | 62GD.00 | Antenatal ultrasound scan at 17-22 weeks                     |
| 30 | 98481  | 68b4.00 | Repeat antenatal screening required                          |
| 31 | 14084  | 62GC.00 | Antenatal ultrasound scan at 9-16 weeks                      |
| 32 | 28732  | 62c..00 | Antenatal screening                                          |
| 33 | 6095   | 9N1N.00 | Seen in antenatal clinic                                     |
| 34 | 99849  | 68bA.00 | Antenatal screening, at risk couple identified               |
| 35 | 21957  | 62I..11 | AFP test - antenatal                                         |
| 36 | 73765  | L311200 | Secondary uterine inertia with antenatal problem             |
| 37 | 102246 | L265200 | Small-for-dates with antenatal problem                       |
| 38 | 73191  | L226200 | Brow presentation with antenatal problem                     |
| 39 | 69254  | L264200 | Intrauterine death with antenatal problem                    |
| 40 | 104766 | L30z200 | Obstructed labour NOS with antenatal problem                 |
| 41 | 109071 | 38B6.00 | Antenatal risk assessment                                    |
| 42 | 7845   | Z212.00 | Antenatal care                                               |
| 43 | 30378  | L244312 | Rectocele complicating antenatal care - baby not delivered   |
| 44 | 101938 | L390300 | Maternal distress with antenatal problem                     |
| 45 | 90277  | L350200 | Rupture of uterus before labour with antenatal problem       |
| 46 | 97259  | 68b6.00 | Antenatal screening declined                                 |
| 47 | 111183 | 8IHD.00 | Health visitor antenatal visit declined                      |
| 48 | 106588 | 62NJ.00 | Antenatal 22 week examination                                |
| 49 |        |         |                                                              |
| 50 |        |         |                                                              |
| 51 |        |         |                                                              |
| 52 |        |         |                                                              |
| 53 |        |         |                                                              |
| 54 |        |         |                                                              |
| 55 |        |         |                                                              |
| 56 |        |         |                                                              |
| 57 |        |         |                                                              |
| 58 |        |         |                                                              |
| 59 |        |         |                                                              |
| 60 |        |         |                                                              |

|    |        |         |                                                              |
|----|--------|---------|--------------------------------------------------------------|
| 1  |        |         |                                                              |
| 2  |        |         |                                                              |
| 3  |        |         |                                                              |
| 4  |        |         |                                                              |
| 5  |        |         |                                                              |
| 6  |        |         |                                                              |
| 7  |        |         |                                                              |
| 8  |        |         |                                                              |
| 9  |        |         |                                                              |
| 10 |        |         |                                                              |
| 11 |        |         |                                                              |
| 12 |        |         |                                                              |
| 13 |        |         |                                                              |
| 14 |        |         |                                                              |
| 15 |        |         |                                                              |
| 16 |        |         |                                                              |
| 17 |        |         |                                                              |
| 18 |        |         |                                                              |
| 19 |        |         |                                                              |
| 20 |        |         |                                                              |
| 21 |        |         |                                                              |
| 22 |        |         |                                                              |
| 23 |        |         |                                                              |
| 24 |        |         |                                                              |
| 25 |        |         |                                                              |
| 26 |        |         |                                                              |
| 27 |        |         |                                                              |
| 28 |        |         |                                                              |
| 29 |        |         |                                                              |
| 30 |        |         |                                                              |
| 31 |        |         |                                                              |
| 32 |        |         |                                                              |
| 33 |        |         |                                                              |
| 34 |        |         |                                                              |
| 35 |        |         |                                                              |
| 36 |        |         |                                                              |
| 37 |        |         |                                                              |
| 38 |        |         |                                                              |
| 39 |        |         |                                                              |
| 40 |        |         |                                                              |
| 41 |        |         |                                                              |
| 42 |        |         |                                                              |
| 43 |        |         |                                                              |
| 44 |        |         |                                                              |
| 45 |        |         |                                                              |
| 46 |        |         |                                                              |
| 47 |        |         |                                                              |
| 48 |        |         |                                                              |
| 49 |        |         |                                                              |
| 50 |        |         |                                                              |
| 51 |        |         |                                                              |
| 52 |        |         |                                                              |
| 53 |        |         |                                                              |
| 54 |        |         |                                                              |
| 55 |        |         |                                                              |
| 56 |        |         |                                                              |
| 57 |        |         |                                                              |
| 58 |        |         |                                                              |
| 59 |        |         |                                                              |
| 60 |        |         |                                                              |
|    | 30801  | 62OZ.00 | Misc. antenatal data NOS                                     |
|    | 49665  | ZV28600 | [V]Antenatal screening for chromosomal anomalies             |
|    | 21543  | 622..00 | Antenatal care: gravida No.                                  |
|    | 109313 | 9Nil.00 | Did not attend antenatal appointment                         |
|    | 102755 | 8CEM.00 | Downs syndrome antenatal screening information leaflet given |
|    | 37985  | L2AX.00 | Abnormal finding on antenatal screening of mother            |
|    | 91272  | L440300 | Puerperal cerebrovascular disorder with antenatal comp       |
|    | 99286  | L28y200 | Other amniotic/membrane problem with antenatal problem       |
|    | 99479  | L267200 | Other placental conditions with antenatal problem            |
|    | 10056  | 62N..00 | Antenatal examinations                                       |
|    | 44401  | L305200 | Shoulder dystocia with antenatal problem                     |
|    | 35484  | 679E.00 | Antenatal education                                          |
|    | 103512 | L330200 | Prolapse of cord with antenatal problem                      |
|    | 99939  | L33y200 | Other umbilical cord complications with antenatal problem    |
|    | 101354 | L244311 | Cystocele complicating antenatal care - baby not delivered   |
|    | 39611  | 62GE.00 | Antenatal ultrasound scan at 22-40 weeks                     |
|    | 40597  | ZV28y00 | [V]Other specified antenatal screening                       |
|    | 70046  | L2A4.00 | Abnormal radiological finding on antenatal screen of mother  |
|    | 105047 | L2A2.00 | Abnormal cytological finding on antenatal screen of mother   |
|    | 96678  | L33z200 | Umbilical cord complications NOS with antenatal problem      |
|    | 15685  | L2A..00 | Abnormal findings on antenatal screening of mother           |
|    | 2029   | 62G..00 | Antenatal ultrasound scan                                    |
|    | 103787 | 1514100 | Estimated date of delivery by antenatal ultrasound scan      |
|    | 31570  | 6224    | Antenatal care: multip                                       |
|    | 97391  | L281200 | Premature rupture of membranes with antenatal problem        |
|    | 65725  | L413000 | Antenatal deep vein thrombosis unspecified                   |
|    | 13819  | 62F..00 | Antenatal amniocentesis                                      |
|    | 107186 | L266200 | Large-for-dates with antenatal problem                       |
|    | 16750  | 6221    | Antenatal care: primigravida                                 |
|    | 71851  | L229200 | Prolapsed arm with antenatal problem                         |
|    | 105865 | 67AJ.00 | Provision of information about antenatal screening           |
|    | 109043 | 9NFV.00 | Health visitor antenatal visit                               |
|    | 47928  | L280200 | Oligohydramnios with antenatal problem                       |
|    | 6298   | ZV28.00 | [V]Antenatal screening                                       |
|    | 45032  | 62O..00 | Misc. antenatal data                                         |
|    | 66496  | L222200 | Breech presentation with antenatal problem                   |
|    | 444    | 8HT9.00 | Referral to antenatal clinic                                 |
|    | 14083  | 62GZ.00 | Antenatal ultrasound scan NOS                                |
|    | 13419  | 62L..00 | Antenatal blood group screen                                 |
|    | 42120  | L2A0.00 | Abnormal haematologic find on antenatal screening of mother  |
|    | 13416  | 62M..00 | Antenatal sickle cell screen                                 |
|    | 69788  | L260200 | Fetal-maternal haemorrhage with antenatal problem            |
|    | 73734  | ZVu2900 | [X]Other antenatal screening                                 |
|    | 95107  | L312200 | Other uterine inertia with antenatal problem                 |
|    | 103677 | Eu32B00 | [X]Antenatal depression                                      |



|    |        |         |                                                              |
|----|--------|---------|--------------------------------------------------------------|
| 1  |        |         |                                                              |
| 2  |        |         |                                                              |
| 3  | 106923 | 62NK.00 | Antenatal 25 week examination                                |
| 4  | 108811 | L245300 | Cervical incompetence with antenatal problem                 |
| 5  | 73407  | L261200 | Rhesus isoimmunisation with antenatal problem                |
| 6  | 101980 | 65QG.00 | Antenatal screening shows non sig haemoglobinopathy carrier  |
| 7  | 44828  | L263200 | Fetal distress with antenatal problem                        |
| 8  | 45091  | 62Y..00 | Routine antenatal care                                       |
| 9  | 71862  | L323200 | Delayed delivery second twin with antenatal problem          |
| 10 | 71794  | L307200 | Other failed trial of labour with antenatal problem          |
| 11 | 51432  | 62FZ.00 | Antenatal amniocentesis NOS                                  |
| 12 | 97523  | 68b..00 | Antenatal screening status                                   |
| 13 | 28290  | L2A3.00 | Abnormal ultrasonic finding on antenatal screening of mother |
| 14 | 36226  | L2A1.00 | Abnormal biochemical finding on antenatal screen of mother   |
| 15 | 100502 | L413200 | Antenatal deep vein thrombosis with antenatal complication   |
| 16 | 61203  | L413z00 | Antenatal deep vein thrombosis NOS                           |
| 17 | 100578 | L255200 | Fetus with drug damage with antenatal problem                |
| 18 | 69072  | L262200 | Other blood-group isoimmunisation with antenatal problem     |
| 19 | 49617  | 622Z.00 | Antenatal care: gravida NOS                                  |
| 20 | 26873  | L413.11 | DVT - deep venous thrombosis, antenatal                      |
| 21 | 33009  | 6254    | A/N care: H/O child abuse                                    |
| 22 | 29610  | 62NB.00 | A/N 36 week examination                                      |
| 23 | 61162  | L250200 | Fetus with central nervous system malformation + a/n problem |
| 24 | 52044  | 6252    | A/N care: poor A/N attender                                  |
| 25 | 35513  | 6284    | A/N care: primip. > 30 years                                 |
| 26 | 26695  | 625Z.00 | A/N care: social risk NOS                                    |
| 27 | 55605  | 62NH.00 | A/N 42 week examination                                      |
| 28 | 30797  | 6233    | A/N care: grand multip                                       |
| 29 | 23013  | 6231    | A/N care: uncertain dates                                    |
| 30 | 36516  | 62F4.00 | A/N amniocentesis wanted                                     |
| 31 | 37046  | 628Z.00 | A/N risk NOS                                                 |
| 32 | 107506 | 62H2.00 | A/N Rh screen offered                                        |
| 33 | 25331  | 62O6.11 | Vaginal 'show' - A/N                                         |
| 34 | 64537  | 62GA.00 | A/N U/S scan for slow growth                                 |
| 35 | 13821  | 62F6.00 | A/N amniocentesis - normal                                   |
| 36 | 19772  | 62F3.00 | A/N amniocentesis - not wanted                               |
| 37 | 70840  | L240311 | Bicornuate uterus complicating a/n care, baby not delivered  |
| 38 | 33287  | 62F1.00 | A/N amniocentesis -not offered                               |
| 39 | 13171  | 62N8.00 | A/N 32 week examination                                      |
| 40 | 52049  | 62G3.00 | A/N U/S scan not wanted                                      |
| 41 | 33008  | 6285    | A/N care: multip. > 35 years                                 |
| 42 | 26696  | 6253    | A/N care: late booker                                        |
| 43 | 24219  | 62A..00 | A/N care provider                                            |
| 44 | 13308  | 625..00 | A/N care: social risk                                        |
| 45 | 26692  | 6236    | A/N care: poor obstetr history                               |
| 46 | 37222  | 62G1.00 | A/N U/S scan not offered                                     |
| 47 | 25391  | 62I..12 | Alpha-feto protein test - A/N                                |
| 48 |        |         |                                                              |
| 49 |        |         |                                                              |
| 50 |        |         |                                                              |
| 51 |        |         |                                                              |
| 52 |        |         |                                                              |
| 53 |        |         |                                                              |
| 54 |        |         |                                                              |
| 55 |        |         |                                                              |
| 56 |        |         |                                                              |
| 57 |        |         |                                                              |
| 58 |        |         |                                                              |
| 59 |        |         |                                                              |
| 60 |        |         |                                                              |

|    |        |         |                                                              |
|----|--------|---------|--------------------------------------------------------------|
| 1  |        |         |                                                              |
| 2  |        |         |                                                              |
| 3  |        |         |                                                              |
| 4  | 35512  | 6281    | A/N care: under 5ft tall                                     |
| 5  | 31251  | 627..00 | A/N care: gynae. risk                                        |
| 6  | 26551  | 62NE.00 | A/N 39 week examination                                      |
| 7  | 68089  | 62HZ.00 | A/N Rh antibody screen NOS                                   |
| 8  | 26691  | 6235    | A/N care: H/O perinatal death                                |
| 9  | 35826  | 62G6.00 | A/N U/S scan normal += dates                                 |
| 10 | 30885  | 62G4.00 | A/N U/S scan wanted                                          |
| 11 | 70289  | 62F9.00 | A/N amnio. for ? neural tube                                 |
| 12 | 26693  | 626..00 | A/N care: medical risk                                       |
| 13 | 73099  | L246311 | Polyp of cervix complicating a/n care- baby not delivered    |
| 14 | 20401  | L241311 | Uterine fibroid complicating a/n care, baby not delivered    |
| 15 | 65450  | 62F2.00 | A/N amniocentesis - offered                                  |
| 16 | 24236  | 62AZ.00 | A/N care provider NOS                                        |
| 17 | 26553  | 62ND.00 | A/N 38 week examination                                      |
| 18 | 102160 | L283200 | Prolonged artificial rupture of membranes with a/n problem   |
| 19 | 64141  | 62K2.00 | A/N syphilis screen-blood sent                               |
| 20 | 26550  | 62A2.00 | A/N care from consultant                                     |
| 21 | 89025  | L237200 | Other fetal abnormality causing disproportion with a/n prob  |
| 22 | 102099 | 62MZ.00 | A/N sickle cell screen NOS                                   |
| 23 | 47415  | 62G5.00 | A/N U/S scan awaited                                         |
| 24 | 13415  | 62A4.00 | A/N care midwifery led                                       |
| 25 | 54734  | L28z200 | Amniotic cavity and membrane problem NOS with a/n problem    |
| 26 | 14086  | 62G8.00 | A/N U/S scan abnormal                                        |
| 27 | 37221  | 62G7.00 | A/N U/S scan normal +? dates                                 |
| 28 | 66608  | L241300 | Tumour of uterine body complicating a/n care, baby not deliv |
| 29 | 71797  | L248300 | Vulval abn complicating a/n care - baby not yet delivered    |
| 30 | 37029  | 62NG.00 | A/N 41 week examination                                      |
| 31 | 29727  | 62NA.00 | A/N 35 week examination                                      |
| 32 | 108885 | 62L1.00 | A/N blood gp screen not done                                 |
| 33 | 39172  | 62L2.00 | A/N blood group screen done                                  |
| 34 | 38165  | 6237    | A/N care: H/O trophoblast.dis.                               |
| 35 | 35511  | 6234    | A/N care: H/O stillbirth                                     |
| 36 | 26875  | 6232    | A/N care: recurrent aborter                                  |
| 37 | 9546   | 623..00 | A/N care: obstetric risk                                     |
| 38 | 73120  | L247300 | Vaginal abnormality complicating a/n care-baby not delivered |
| 39 | 24214  | 62A1.00 | A/N care from G.P.                                           |
| 40 | 13169  | 62N5.00 | A/N 24 week examination                                      |
| 41 | 29627  | 62N7.00 | A/N 30 week examination                                      |
| 42 | 3517   | 62N1.00 | A/N booking examination                                      |
| 43 | 62147  | 62F8.00 | A/N amnio. for ? chrom.abnorm.                               |
| 44 | 37047  | 6242    | A/N care: H/O infertility                                    |
| 45 | 27057  | 62G9.00 | A/N U/S scan for ? abnormality                               |
| 46 | 70616  | 62M2.00 | A/N sickle cell screen done                                  |
| 47 | 29059  | 62A3.00 | A/N - shared care                                            |
| 48 | 108867 | 62M1.00 | A/N sickle screen not done                                   |
| 49 |        |         |                                                              |
| 50 |        |         |                                                              |
| 51 |        |         |                                                              |
| 52 |        |         |                                                              |
| 53 |        |         |                                                              |
| 54 |        |         |                                                              |
| 55 |        |         |                                                              |
| 56 |        |         |                                                              |
| 57 |        |         |                                                              |
| 58 |        |         |                                                              |
| 59 |        |         |                                                              |
| 60 |        |         |                                                              |

|    |        |         |                                                              |
|----|--------|---------|--------------------------------------------------------------|
| 1  |        |         |                                                              |
| 2  |        |         |                                                              |
| 3  | 12260  | 62H..00 | A/N Rh antibody screen                                       |
| 4  | 41955  | 62F5.00 | A/N amniocentesis - awaited                                  |
| 5  | 13166  | 62N3.00 | A/N 16 week examination                                      |
| 6  | 35510  | 6241    | A/N care: elderly primip.                                    |
| 7  |        |         |                                                              |
| 8  | 26552  | 62NC.00 | A/N 37 week examination                                      |
| 9  | 29280  | 62NF.00 | A/N 40 week examination                                      |
| 10 |        |         |                                                              |
| 11 | 3786   | 628..00 | A/N care: risk NOS                                           |
| 12 | 39728  | 62O..11 | Fetal maturity - A/N                                         |
| 13 | 13822  | 62F7.00 | A/N amniocentesis - abnormal                                 |
| 14 | 71912  | 62H1.00 | A/N Rh screen not offered                                    |
| 15 | 26694  | 6251    | A/N care: poor home conditions                               |
| 16 |        |         |                                                              |
| 17 | 70186  | 62LZ.00 | A/N blood group screen NOS                                   |
| 18 | 26690  | 623Z.00 | A/N care: obstetric risk NOS                                 |
| 19 | 98957  | L240300 | Cong abnorm uterus complicating a/n care, baby not delivered |
| 20 | 13170  | 62N9.00 | A/N 34 week examination                                      |
| 21 | 109166 | 62K1.00 | A/N syphilis screen not done                                 |
| 22 |        |         |                                                              |
| 23 | 13167  | 62N2.00 | A/N 12 weeks examination                                     |
| 24 | 37220  | 62G2.00 | A/N U/S scan offered                                         |
| 25 |        |         |                                                              |
| 26 | 29364  | 62N4.00 | A/N 20 week examination                                      |
| 27 | 26554  | 62N6.00 | A/N 28 week examination                                      |
| 28 |        |         |                                                              |
| 29 | 31250  | 6283    | A/N care: primip. < 17 years                                 |
| 30 | 30209  | ZV27000 | [V]Single live birth                                         |
| 31 | 20573  | Q48D000 | [X]Fresh stillbirth                                          |
| 32 |        |         |                                                              |
| 33 | 11966  | ZV27.11 | [V]Live birth                                                |
| 34 | 8906   | ZV27.12 | [V]Stillbirth                                                |
| 35 |        |         |                                                              |
| 36 | 41253  | 7F...11 | Childbirth operations                                        |
| 37 | 10719  | 6331    | Single live birth                                            |
| 38 | 28726  | 7F19100 | Water birth delivery                                         |
| 39 | 58978  | Q20y.00 | Other specified birth trauma                                 |
| 40 | 37884  | Z254D00 | Face to pubes birth                                          |
| 41 | 72025  | ZV3zz00 | [V]Unspecified birth, NOS                                    |
| 42 | 8776   | Q48D.00 | [X] Stillbirth                                               |
| 43 |        |         |                                                              |
| 44 | 5253   | 633a.00 | Birth of child                                               |
| 45 | 31203  | 6332    | Single stillbirth                                            |
| 46 | 13287  | 633..11 | Livebirth                                                    |
| 47 | 17354  | 633..13 | Triplet birth                                                |
| 48 | 1825   | 633..14 | Twin birth                                                   |
| 49 |        |         |                                                              |
| 50 | 1214   | 6311    | Home birth                                                   |
| 51 | 2353   | 63E2.00 | Normal birth                                                 |
| 52 | 974    | Q4z..15 | Stillbirth NEC                                               |
| 53 | 110211 | 633C.00 | Intrapartum stillbirth                                       |
| 54 | 70813  | ZV27500 | [V]Other multiple birth, all live born                       |
| 55 | 37878  | Z254E11 | Multiple birth delivery                                      |
| 56 | 42324  | L34z.00 | Vulval/perineal trauma during delivery NOS                   |
| 57 |        |         |                                                              |
| 58 | 55124  | L39yz00 | Other complications of labour and delivery NOS               |
| 59 |        |         |                                                              |
| 60 |        |         |                                                              |

|    |        |         |                                                              |
|----|--------|---------|--------------------------------------------------------------|
| 1  |        |         |                                                              |
| 2  |        |         |                                                              |
| 3  |        |         |                                                              |
| 4  | 27351  | Q036.00 | Fetus or neonate affected by precipitate delivery            |
| 5  | 43918  | L340400 | Fourchette tear during delivery                              |
| 6  | 33915  | L213.00 | Multiple delivery                                            |
| 7  | 5213   | 7F16400 | Low forceps cephalic delivery                                |
| 8  |        |         |                                                              |
| 9  | 25223  | L396.00 | Vacuum extractor delivery                                    |
| 10 | 57957  | 7F1Ay00 | Other specified other method of delivery                     |
| 11 | 7670   | L398z00 | Caesarean delivery NOS                                       |
| 12 | 24243  | L263400 | Labour and delivery complic by meconium in amniotic fluid    |
| 13 | 15828  | 14Y4.00 | Born by breech delivery                                      |
| 14 | 69780  | Lyu5100 | [X]Other and unspecified forceps delivery                    |
| 15 | 62862  | L342200 | Third degree perineal tear during delivery with p/n problem  |
| 16 | 68752  | Z253300 | Normal rate of delivery                                      |
| 17 | 33773  | 7F19y00 | Other specified normal delivery                              |
| 18 |        |         |                                                              |
| 19 | 30775  | 62B8.00 | Midwife unit delivery booking                                |
| 20 | 6452   | L395.00 | Forceps delivery                                             |
| 21 | 239    | L20..11 | Spontaneous vaginal delivery                                 |
| 22 |        |         |                                                              |
| 23 | 95858  | L34y100 | Other vulval/perineal trauma during delivery- delivered      |
| 24 | 29070  | 7F15000 | Spontaneous breech delivery                                  |
| 25 |        |         |                                                              |
| 26 | 19605  | L341z00 | Second degree perineal tear during delivery NOS              |
| 27 | 57945  | 7F17200 | Vacuum delivery before full dilation of cervix               |
| 28 | 72022  | L343000 | Fourth degree perineal tear during delivery, unspecified     |
| 29 | 19607  | L344000 | Unspecified perineal laceration during delivery, unspecified |
| 30 |        |         |                                                              |
| 31 | 3365   | L142.11 | Premature delivery                                           |
| 32 |        |         |                                                              |
| 33 | 27914  | 62V..00 | Delivery place planned                                       |
| 34 | 90885  | Lyu4900 | [X]Labour+delivery complicated by other cord entanglement    |
| 35 |        |         |                                                              |
| 36 | 56310  | Z25..00 | Delivery observations                                        |
| 37 | 12052  | Z257.00 | Delivery normal                                              |
| 38 | 11532  | 7F14.00 | Breech extraction delivery                                   |
| 39 | 13164  | 62BZ.00 | Delivery booking - place NOS                                 |
| 40 | 61212  | L34y.00 | Other vulval and perineal trauma during delivery             |
| 41 | 61077  | 7F16200 | Mid forceps cephalic delivery with rotation                  |
| 42 | 5866   | 7F1..00 | Induction and delivery operations                            |
| 43 |        |         |                                                              |
| 44 | 65940  | 7F16500 | Trial of forceps delivery                                    |
| 45 | 19608  | L340z00 | First degree perineal tear during delivery NOS               |
| 46 | 52875  | L398000 | Caesarean delivery unspecified                               |
| 47 | 83535  | Lyu5000 | [X]Other single spontaneous delivery                         |
| 48 | 47625  | Z22C200 | Estimated date of delivery from last normal period           |
| 49 | 17744  | 7F13100 | Lower uterine segment caesarean delivery NEC                 |
| 50 | 15073  | 7F13y00 | Other specified other caesarean delivery                     |
| 51 |        |         |                                                              |
| 52 | 9800   | L398300 | Delivery by elective caesarean section                       |
| 53 | 37699  | L396z00 | Vacuum extractor delivery NOS                                |
| 54 | 72021  | L343100 | Fourth degree perineal tear during delivery - delivered      |
| 55 | 107136 | Q031.11 | Fetus affected by malpresentation during delivery            |
| 56 | 17684  | L395.11 | Keilland's forceps delivery                                  |
| 57 |        |         |                                                              |
| 58 | 20425  | L395.12 | Neville - Barnes forceps delivery                            |
| 59 |        |         |                                                              |
| 60 |        |         |                                                              |

|    |        |         |                                                             |
|----|--------|---------|-------------------------------------------------------------|
| 1  |        |         |                                                             |
| 2  |        |         |                                                             |
| 3  |        |         |                                                             |
| 4  | 4780   | L20..00 | Normal delivery in a completely normal case                 |
| 5  | 5868   | Ly0..00 | Spontaneous vertex delivery                                 |
| 6  | 106113 | Lyu5800 | [X]Multiple delivery, unspecified                           |
| 7  | 62406  | L323000 | Delayed delivery second twin unspecified                    |
| 8  | 61540  | Z212100 | Delivery place planned                                      |
| 9  | 47157  | L34zz00 | Vulval/perineal trauma during delivery NOS                  |
| 10 | 58176  | 62C2.00 | Full stay delivery booking                                  |
| 11 | 32283  | Z212200 | Home delivery planned                                       |
| 12 | 106808 | L34z200 | Vulval/perineal trauma during delivery NOS with p/n problem |
| 13 | 740    | 7F12.00 | Elective caesarean delivery                                 |
| 14 | 111579 | Z263300 | Condition of membranes at delivery                          |
| 15 | 34102  | Z262700 | Incomplete placenta at delivery                             |
| 16 | 21554  | 7F16900 | Kielland forceps cephalic delivery with rotation            |
| 17 | 31254  | L340100 | First degree perineal tear during delivery - delivered      |
| 18 | 23394  | 7F16300 | Mid forceps cephalic delivery NEC                           |
| 19 | 54591  | 7F14z00 | Breech extraction delivery NOS                              |
| 20 | 3085   | 7F12z00 | Elective caesarean delivery NOS                             |
| 21 | 22491  | Ly1..00 | Spontaneous breech delivery                                 |
| 22 | 19609  | L340600 | Vaginal tear during delivery                                |
| 23 | 39168  | L342100 | Third degree perineal tear during delivery - delivered      |
| 24 | 44235  | L296.00 | Vaginal delivery following previous caesarean section       |
| 25 | 40706  | L344z00 | Unspecified perineal laceration during delivery NOS         |
| 26 | 27993  | 62V0.00 | Home delivery planned                                       |
| 27 | 58721  | L20z.00 | Normal delivery in completely normal case NOS               |
| 28 | 33477  | L398100 | Caesarean delivery - delivered                              |
| 29 | 27963  | L323.00 | Delayed delivery of second twin, triplet etc                |
| 30 | 37509  | 7F1A300 | Drainage of hydrocephalus of fetus to facilitate delivery   |
| 31 | 30806  | L34yz00 | Other vulval/perineal trauma during delivery NOS            |
| 32 | 30373  | Z22C100 | Estimated date of delivery from last period                 |
| 33 | 42572  | L323100 | Delayed delivery second twin - delivered                    |
| 34 | 15514  | 7F13000 | Upper uterine segment caesarean delivery NEC                |
| 35 | 47546  | 7F12y00 | Other specified elective caesarean delivery                 |
| 36 | 86399  | 7F17y00 | Other specified vacuum delivery                             |
| 37 | 13352  | L34..00 | Trauma to perineum and vulva during delivery                |
| 38 | 49446  | L396100 | Vacuum extractor delivery - delivered                       |
| 39 | 15256  | L344.00 | Unspecified perineal laceration during delivery             |
| 40 | 37054  | L341100 | Second degree perineal tear during delivery - delivered     |
| 41 | 3108   | 7F1B000 | Episiotomy to facilitate delivery                           |
| 42 | 47863  | Lyu5200 | [X]Other single delivery by caesarean section               |
| 43 | 9160   | Z257100 | Spontaneous vertex delivery                                 |
| 44 | 58844  | L396000 | Vacuum extractor delivery unspecified                       |
| 45 | 57488  | L34z100 | Vulval/perineal trauma during delivery NOS - delivered      |
| 46 | 27731  | L345.12 | Vulval and perineal haematoma during delivery               |
| 47 | 104872 | L143100 | Premature labour with premature delivery                    |
| 48 | 42275  | L395300 | Mid-cavity forceps delivery                                 |
| 49 |        |         |                                                             |
| 50 |        |         |                                                             |
| 51 |        |         |                                                             |
| 52 |        |         |                                                             |
| 53 |        |         |                                                             |
| 54 |        |         |                                                             |
| 55 |        |         |                                                             |
| 56 |        |         |                                                             |
| 57 |        |         |                                                             |
| 58 |        |         |                                                             |
| 59 |        |         |                                                             |
| 60 |        |         |                                                             |

|    |       |         |                                                              |
|----|-------|---------|--------------------------------------------------------------|
| 1  |       |         |                                                              |
| 2  |       |         |                                                              |
| 3  |       |         |                                                              |
| 4  | 40876 | L342z00 | Third degree perineal tear during delivery NOS               |
| 5  | 93273 | L39z100 | Complications of labour and delivery NOS - delivered         |
| 6  | 42755 | L387.00 | Spinal/epidural ansth-induced headache dur labour/delivery   |
| 7  | 57789 | L395400 | Delivery by combination of forceps and vacuum extractor      |
| 8  |       |         |                                                              |
| 9  | 19603 | L340000 | First degree perineal tear during delivery, unspecified      |
| 10 | 4786  | L213200 | Multiple delivery, all by caesarean section                  |
| 11 | 20002 | 7F16000 | High forceps cephalic delivery with rotation                 |
| 12 | 66501 | L39zz00 | Complications of labour and delivery NOS                     |
| 13 | 34333 | Z262711 | Incomplete delivery of placenta                              |
| 14 | 19602 | L341000 | Second degree perineal tear during delivery, unspecified     |
| 15 | 39866 | 7F1A200 | Cleidotomy of fetus to facilitate delivery                   |
| 16 |       |         |                                                              |
| 17 | 30805 | L34y000 | Other vulval/perineal trauma during delivery, unspecified    |
| 18 | 11530 | Z254900 | Vaginal delivery                                             |
| 19 |       |         |                                                              |
| 20 | 67489 | L34z000 | Vulval/perineal trauma during delivery NOS unspec            |
| 21 | 4638  | 7F13.00 | Other caesarean delivery                                     |
| 22 | 40744 | Z254A00 | Abnormal delivery                                            |
| 23 |       |         |                                                              |
| 24 | 25157 | L142100 | Early onset of delivery - delivered                          |
| 25 | 17704 | L395.13 | Simpson's forceps delivery                                   |
| 26 |       |         |                                                              |
| 27 | 39573 | Z265900 | Umbilical cord not around baby's neck at delivery            |
| 28 | 5033  | 7F16100 | High forceps cephalic delivery NEC                           |
| 29 | 26549 | 62B1.00 | Delivery: no place booked                                    |
| 30 | 50293 | 7F1z.00 | Induction and delivery operations NOS                        |
| 31 |       |         |                                                              |
| 32 | 67862 | L39..00 | Other complications of labour and delivery NEC               |
| 33 | 63277 | L393.00 | Acute renal failure following labour and delivery            |
| 34 | 32380 | L34..12 | Vulval delivery trauma                                       |
| 35 |       |         |                                                              |
| 36 | 23866 | 7F1B100 | Symphysiotomy to facilitate delivery                         |
| 37 | 618   | L398400 | Delivery by emergency caesarean section                      |
| 38 | 66315 | Lyu5500 | [X]Other specified assisted single delivery                  |
| 39 | 23791 | L38A.00 | Failed or difficult intubation during labour and delivery    |
| 40 | 99608 | 7F1Bz00 | Other operation to facilitate delivery NOS                   |
| 41 |       |         |                                                              |
| 42 | 98749 | 7F1B400 | Incision of cervix to facilitate delivery                    |
| 43 | 30274 | L395200 | Low forceps delivery                                         |
| 44 |       |         |                                                              |
| 45 | 35190 | 7F13z00 | Other caesarean delivery NOS                                 |
| 46 | 40710 | L395z00 | Forceps delivery NOS                                         |
| 47 | 26712 | L340300 | Labial tear during delivery                                  |
| 48 | 62789 | Q031.00 | Fetus/neonate affected by malposition/disproportion-delivery |
| 49 | 2624  | Q033.00 | Fetus or neonate affected by vacuum extraction delivery      |
| 50 |       |         |                                                              |
| 51 | 19599 | L340.00 | First degree perineal tear during delivery                   |
| 52 | 11650 | L342.00 | Third degree perineal tear during delivery                   |
| 53 |       |         |                                                              |
| 54 | 51736 | 7F17100 | Low vacuum delivery                                          |
| 55 | 36703 | L345.00 | Vulval and perineal haematoma during delivery                |
| 56 | 2458  | 7F17.00 | Vacuum delivery                                              |
| 57 |       |         |                                                              |
| 58 | 22975 | 62B3.00 | G.P. unit delivery booking                                   |
| 59 | 32988 | 62B5.00 | Private home delivery booking                                |
| 60 | 49485 | L263600 | Labour+delivery complicatd by biochem evidence/fetal stress  |

|    |        |         |                                                             |
|----|--------|---------|-------------------------------------------------------------|
| 1  |        |         |                                                             |
| 2  |        |         |                                                             |
| 3  |        |         |                                                             |
| 4  | 5522   | L3z..00 | Complications of labour and delivery NOS                    |
| 5  | 103319 | Lyu4.00 | [X]Complications of labour and delivery                     |
| 6  | 14789  | Q030.11 | Fetus affected by breech delivery                           |
| 7  | 34411  | Z254300 | Delivered by mid-cavity forceps delivery                    |
| 8  | 48230  | Z254800 | Deliveries by spontaneous breech delivery                   |
| 9  | 36137  | L142z00 | Early onset of delivery NOS                                 |
| 10 | 59941  | L142000 | Early onset of delivery unspecified                         |
| 11 | 20738  | 7F19000 | Manually assisted vaginal delivery                          |
| 12 | 34628  | 7F16600 | Failed forceps delivery                                     |
| 13 | 33480  | 7F16y00 | Other specified forceps cephalic delivery                   |
| 14 | 37245  | L345000 | Vulval and perineal haematoma during delivery, unspecified  |
| 15 | 43959  | 633Z.00 | Outcome of delivery NOS                                     |
| 16 | 70615  | L345z00 | Vulval and perineal haematoma during delivery NOS           |
| 17 | 60953  | Z253211 | Precipitate delivery                                        |
| 18 | 53572  | L3y..00 | Other specified complications of labour or delivery         |
| 19 | 9668   | 7F12100 | Elective lower uterine segment caesarean delivery           |
| 20 | 9791   | Z257.15 | ND - Normal delivery                                        |
| 21 | 9625   | L263300 | Labour and delivery complicated by fetal heart rate anomaly |
| 22 | 28861  | L398500 | Delivery by caesarean hysterectomy                          |
| 23 | 49733  | L388.00 | Cardiac comps of anaesthesia during labour and delivery     |
| 24 | 15480  | 14Y3.00 | Born by normal vaginal delivery                             |
| 25 | 98059  | Lyu5400 | [X]Other manipulation-assisted delivery                     |
| 26 | 69971  | Z253100 | Slow rate of delivery                                       |
| 27 | 61226  | ZV27y00 | [V]Other specified outcome of delivery                      |
| 28 | 105276 | 7F14000 | Breech extraction delivery with version                     |
| 29 | 103890 | 1514000 | Estimated date of delivery from last period                 |
| 30 | 101229 | Z255A00 | Observation of delivery push in labour                      |
| 31 | 50675  | L395100 | Forceps delivery - delivered                                |
| 32 | 44472  | L39y.00 | Other complications of labour and delivery                  |
| 33 | 48742  | Z254C00 | Face delivery                                               |
| 34 | 33884  | L213000 | Multiple delivery, all spontaneous                          |
| 35 | 14892  | 7F17z00 | Vacuum delivery NOS                                         |
| 36 | 64464  | 7F15z00 | Other breech delivery NOS                                   |
| 37 | 13163  | 62B..00 | Delivery booking place                                      |
| 38 | 105419 | 7F17000 | High vacuum delivery                                        |
| 39 | 8879   | 1514.12 | Estimated date of delivery                                  |
| 40 | 720    | L398.00 | Caesarean delivery                                          |
| 41 | 29885  | L3...00 | Complications occurring during labour and delivery          |
| 42 | 14727  | 14Y1.00 | Born by forceps delivery                                    |
| 43 | 15675  | 14Y5.00 | Born by ventouse delivery                                   |
| 44 | 167    | 7F19.00 | Normal delivery                                             |
| 45 | 32991  | 62C1.00 | Short stay delivery booking                                 |
| 46 | 688    | 7F17.11 | Ventouse delivery                                           |
| 47 | 463    | L222.12 | Breech delivery                                             |
| 48 | 6141   | L396.11 | Ventouse delivery                                           |
| 49 |        |         |                                                             |
| 50 |        |         |                                                             |
| 51 |        |         |                                                             |
| 52 |        |         |                                                             |
| 53 |        |         |                                                             |
| 54 |        |         |                                                             |
| 55 |        |         |                                                             |
| 56 |        |         |                                                             |
| 57 |        |         |                                                             |
| 58 |        |         |                                                             |
| 59 |        |         |                                                             |
| 60 |        |         |                                                             |

|    |        |         |                                                             |
|----|--------|---------|-------------------------------------------------------------|
| 1  |        |         |                                                             |
| 2  |        |         |                                                             |
| 3  |        |         |                                                             |
| 4  | 28903  | Z254200 | Delivered by low forceps delivery                           |
| 5  | 100597 | L39y100 | Other complications of labour and delivery - delivered      |
| 6  | 12014  | ZV27.00 | [V]Outcome of delivery                                      |
| 7  | 61259  | 7F12000 | Elective upper uterine segment caesarean delivery           |
| 8  |        |         |                                                             |
| 9  | 105032 | L143000 | Premature labour without delivery                           |
| 10 | 42885  | Z254.00 | Observation of pattern of delivery                          |
| 11 | 107557 | 63D7.00 | Complete placenta at delivery                               |
| 12 | 37254  | Q030.00 | Fetus or neonate affected by breech delivery and extraction |
| 13 | 3078   | Q032.00 | Fetus or neonate affected by forceps delivery               |
| 14 | 19600  | L341.00 | Second degree perineal tear during delivery                 |
| 15 | 39576  | L343.00 | Fourth degree perineal tear during delivery                 |
| 16 |        |         |                                                             |
| 17 | 31280  | L340500 | Vulval tear during delivery                                 |
| 18 | 25545  | Z212300 | Delivery place booked                                       |
| 19 |        |         |                                                             |
| 20 | 70242  | 7F16700 | Barton forceps cephalic delivery with rotation              |
| 21 | 71057  | L345100 | Vulval and perineal haematoma during delivery - delivered   |
| 22 | 1279   | 7F16.00 | Forceps cephalic delivery                                   |
| 23 |        |         |                                                             |
| 24 | 22976  | 62B2.00 | Home delivery booked                                        |
| 25 | 41414  | 62B6.00 | Delivery booking place changed                              |
| 26 |        |         |                                                             |
| 27 | 104873 | L143.00 | Premature labour and delivery                               |
| 28 | 50847  | L398600 | Caesarean delivery following previous Caesarean delivery    |
| 29 | 18287  | 7F22500 | Normal delivery of placenta                                 |
| 30 | 19604  | L342000 | Third degree perineal tear during delivery, unspecified     |
| 31 | 2943   | L222.11 | Assisted breech delivery                                    |
| 32 | 96089  | Z253200 | Rapid rate of delivery                                      |
| 33 | 8967   | 7F19z00 | Normal delivery NOS                                         |
| 34 |        |         |                                                             |
| 35 | 51065  | 62CZ.00 | Delivery booking - stay NOS                                 |
| 36 | 33378  | 7F15.00 | Other breech delivery                                       |
| 37 |        |         |                                                             |
| 38 | 53937  | L395000 | Forceps delivery unspecified                                |
| 39 | 90497  | L39z400 | Complications of labour and delivery NOS with p/n problem   |
| 40 | 23994  | 7F15100 | Assisted breech delivery                                    |
| 41 |        |         |                                                             |
| 42 | 60256  | Z254B00 | Brow delivery                                               |
| 43 | 60538  | L213100 | Multiple delivery, all by forceps and vacuum extractor      |
| 44 | 15926  | 7F15y00 | Other specified other breech delivery                       |
| 45 | 95780  | Z262600 | Complete placenta at delivery                               |
| 46 | 65702  | L38..00 | Complications of anaesthesia during labour and delivery     |
| 47 | 14686  | 7F16z00 | Forceps cephalic delivery NOS                               |
| 48 |        |         |                                                             |
| 49 | 67052  | L344100 | Unspecified perineal laceration during delivery - delivered |
| 50 | 15167  | L142.00 | Early onset of delivery                                     |
| 51 | 11194  | Z257.12 | Spontaneous vaginal delivery                                |
| 52 |        |         |                                                             |
| 53 | 25681  | Z257.13 | SVD - Spontaneous vaginal delivery                          |
| 54 | 9383   | Z257.11 | Normal delivery                                             |
| 55 | 17492  | Z257.14 | FTND - Full term normal delivery                            |
| 56 |        |         |                                                             |
| 57 | 31780  | L222.13 | Spontaneous breech delivery                                 |
| 58 | 22498  | Z253.12 | Rate of delivery                                            |
| 59 |        |         |                                                             |
| 60 | 52151  | Lyu4800 | [X]Labour+delivery complicat/oth evidence of fetal distress |



|    |        |         |                                                              |
|----|--------|---------|--------------------------------------------------------------|
| 1  |        |         |                                                              |
| 2  |        |         |                                                              |
| 3  | 39319  | 8HE7.00 | Discharged from hospital within 6 hours of delivery          |
| 4  | 73048  | 7F14y00 | Other specified breech extraction delivery                   |
| 5  | 109452 | 7F1By00 | Other specified other operation to facilitate delivery       |
| 6  | 69920  | L39z.00 | Complications of labour and delivery NOS                     |
| 7  | 57652  | L343z00 | Fourth degree perineal tear during delivery NOS              |
| 8  | 53100  | 7F20z00 | Instrumental removal products of concep delivered uterus NOS |
| 9  | 41494  | 7F21z00 | Manual removal products of conception delivered uterus NOS   |
| 10 | 27800  | L124300 | Mild or unspecified pre-eclampsia - not delivered            |
| 11 | 41588  | L112200 | Placental abruption - not delivered                          |
| 12 | 3364   | L126300 | Eclampsia - not delivered                                    |
| 13 | 65759  | L244300 | Other uterine/pelvic floor abnormal - baby not yet delivered |
| 14 | 62880  | L110200 | Placenta praevia without haemorrhage - not delivered         |
| 15 | 69002  | L11y200 | Other antepartum haemorrhage - not delivered                 |
| 16 | 67447  | L125300 | Severe pre-eclampsia - not delivered                         |
| 17 | 64752  | L111200 | Placenta praevia with haemorrhage - not delivered            |
| 18 | 53160  | L127300 | Pre-eclampsia or eclampsia with hypertension - not delivered |
| 19 | 31617  | L130200 | Mild hyperemesis-not delivered                               |
| 20 | 57852  | L100200 | Threatened abortion - not delivered                          |
| 21 | 64298  | L141100 | Other threatened labour - not delivered                      |
| 22 | 54082  | L169300 | Herpes gestationis - not delivered                           |
| 23 | 48830  | L140100 | Threatened premature labour - not delivered                  |
| 24 | 54576  | Z252.00 | Mother not delivered                                         |
| 25 | 2549   | L222.00 | Breech presentation                                          |
| 26 | 13288  | 2722    | O/E - breech presentation                                    |
| 27 | 46298  | L222z00 | Breech presentation NOS                                      |
| 28 | 55359  | Q017100 | Fetus/neonate affected by breech presentation before labour  |
| 29 | 56867  | L300300 | Obstructed labour due to breech presentation                 |
| 30 | 66786  | L397z00 | Breech extraction NOS                                        |
| 31 | 48516  | Z254400 | Deliveries by breech extraction                              |
| 32 | 4955   | L397.00 | Breech extraction                                            |
| 33 | 66106  | L397000 | Breech extraction unspecified                                |
| 34 | 15610  | 7F06300 | External version of breech                                   |
| 35 | 1534   | 7F14100 | Forceps to aftercoming head (breech)                         |
| 36 | 66307  | L222000 | Breech presentation unspecified                              |
| 37 | 16097  | Q214z00 | Liveborn with unspecified fetal distress NOS                 |
| 38 | 33258  | L512.00 | Maternal care for diminished fetal movements                 |
| 39 | 67883  | L514.00 | Maternal care for poor fetal growth                          |
| 40 | 50733  | L263.12 | Fetal bradycardia                                            |
| 41 | 23009  | Q213.11 | Fetal distress in labour - liveborn                          |
| 42 | 48463  | Q410.00 | Fetal blood loss                                             |
| 43 | 23565  | L25..00 | Known or suspected fetal abnormality                         |
| 44 | 43428  | ZV28400 | [V]Screening for fetal growth retardation using ultrasonics  |
| 45 | 5479   | Q212.00 | Liveborn with prelabour fetal distress                       |
| 46 | 106201 | Qyu5400 | [X]Other specified fetal and neonatal haemorrhages           |
| 47 | 31481  | 7F04300 | Electrode applied to fetal scalp                             |
| 48 |        |         |                                                              |
| 49 |        |         |                                                              |
| 50 |        |         |                                                              |
| 51 |        |         |                                                              |
| 52 |        |         |                                                              |
| 53 |        |         |                                                              |
| 54 |        |         |                                                              |
| 55 |        |         |                                                              |
| 56 |        |         |                                                              |
| 57 |        |         |                                                              |
| 58 |        |         |                                                              |
| 59 |        |         |                                                              |
| 60 |        |         |                                                              |

|    |        |         |                                                               |
|----|--------|---------|---------------------------------------------------------------|
| 1  |        |         |                                                               |
| 2  |        |         |                                                               |
| 3  |        |         |                                                               |
| 4  | 107512 | Q102.11 | Fetal malnutrition without mention of 'light for dates'       |
| 5  | 96711  | Q408200 | Escherichia coli intra-amniotic fetal infection               |
| 6  | 98261  | 7F27y00 | OS non routine obstetric scan for fetal observations          |
| 7  | 43893  | Q470.00 | Idiopathic hydrops fetalis                                    |
| 8  | 19590  | 62O1.00 | Fetal movements felt                                          |
| 9  | 48576  | L22y.00 | Other fetal malposition and malpresentation                   |
| 10 | 64959  | 7F01100 | Fetoscopic examination of fetus and sampling of fetal blood   |
| 11 | 36640  | L265300 | Maternal care for poor fetal growth                           |
| 12 | 59566  | Q41yz00 | Fetal or newborn haemorrhage NOS                              |
| 13 | 72837  | 2763    | O/E - fetal heart 40-80                                       |
| 14 | 62654  | 4H72.00 | Amniotic fetal cell abnormal                                  |
| 15 | 28977  | L237.00 | Other fetal abnormality causing disproportion                 |
| 16 | 46514  | L263700 | Maternal care for fetal hypoxia                               |
| 17 | 60301  | 7P0H500 | Fetal echocardiography                                        |
| 18 | 27801  | 2755    | O/E - fetal movement diminished                               |
| 19 | 67438  | Q40y000 | Intrauterine fetal sepsis, unspecified                        |
| 20 | 63905  | Lyu3A00 | [X]Maternal care/known or suspected fetal problem,unspecified |
| 21 | 46784  | Q023200 | Fetus/neonate affected by materno-fetal transplacental trans  |
| 22 | 50281  | Q213z00 | Liveborn with labour fetal distress NOS                       |
| 23 | 25153  | 2753    | O/E - fetal movements felt                                    |
| 24 | 103893 | 7F27400 | Fetal ascites scan                                            |
| 25 | 66619  | Q023011 | Fetus/neonate affected by feto-fetal transplacental transfus  |
| 26 | 101225 | BBK3400 | [M]Fetal rhabdomyoma                                          |
| 27 | 104765 | Q102.00 | Fetal malnutrition, no mention light or small for gest age    |
| 28 | 96669  | L22z.00 | Fetal malposition and malpresentation NOS                     |
| 29 | 55071  | Z271C00 | Fetal heart baseline pattern                                  |
| 30 | 22815  | 275..00 | O/E - fetal movements                                         |
| 31 | 69819  | 274Z.00 | O/E - fetal station NOS                                       |
| 32 | 56744  | Q10..11 | Fetal malnutrition                                            |
| 33 | 9164   | 584..11 | Fetal U-S scan                                                |
| 34 | 66175  | Q45z.00 | Fetal or newborn blood disorder NOS                           |
| 35 | 102019 | Q410600 | Fetal haemorrhage into mother's circulation                   |
| 36 | 104829 | L260000 | Fetal-maternal haemorrhage unspecified                        |
| 37 | 97471  | Q212z00 | Liveborn with prelabour fetal distress NOS                    |
| 38 | 100323 | 4H7..00 | Amniotic fetal cell study                                     |
| 39 | 73393  | 4H71.00 | Amniotic fetal cell study: NAD                                |
| 40 | 53296  | 42YG.00 | Fetal cell test                                               |
| 41 | 48798  | Q45..00 | Fetal and newborn blood disorders                             |
| 42 | 21893  | L510.00 | Maternal care for hydrops fetalis                             |
| 43 | 60774  | Z271100 | Fetal heart acceleration                                      |
| 44 | 62898  | 2768    | O/E - fetal heart 180-200                                     |
| 45 | 95881  | 2762    | O/E - fetal heart < 40                                        |
| 46 | 70856  | 2764    | O/E - fetal heart 80-100                                      |
| 47 | 67186  | 272Z.00 | O/E - fetal presentation NOS                                  |
| 48 | 38608  | L250.11 | Suspect fetal anencephaly                                     |
| 49 |        |         |                                                               |
| 50 |        |         |                                                               |
| 51 |        |         |                                                               |
| 52 |        |         |                                                               |
| 53 |        |         |                                                               |
| 54 |        |         |                                                               |
| 55 |        |         |                                                               |
| 56 |        |         |                                                               |
| 57 |        |         |                                                               |
| 58 |        |         |                                                               |
| 59 |        |         |                                                               |
| 60 |        |         |                                                               |

|    |        |         |                                                             |
|----|--------|---------|-------------------------------------------------------------|
| 1  |        |         |                                                             |
| 2  |        |         |                                                             |
| 3  | 8846   | L250.13 | Suspect fetal spina bifida                                  |
| 4  | 55152  | Q408.00 | Intra-amniotic fetal infection                              |
| 5  | 104218 | L300000 | Obstructed labour due to fetal malposition unspecified      |
| 6  | 99494  | Q455000 | Congenital anaemia from fetal blood loss                    |
| 7  | 91908  | 7F27200 | Fetal biometry                                              |
| 8  | 95754  | Q408z00 | Intra-amniotic fetal infection NOS                          |
| 9  | 62629  | Q41yy00 | Other specified fetal or newborn haemorrhage                |
| 10 | 95064  | Q41y.00 | Other fetal and newborn haemorrhage                         |
| 11 | 19575  | Q10z.00 | Fetal growth retardation NOS                                |
| 12 | 31033  | 7F03100 | Percutaneous insertion of fetal pleuroamniotic shunt        |
| 13 | 53241  | Q214100 | Liveborn with fetal hypoxia, unspecified                    |
| 14 | 26707  | 2766    | O/E - fetal heart 120-160                                   |
| 15 | 38846  | Z271D00 | Normal fetal heart baseline pattern                         |
| 16 | 44071  | Q479.00 | Non-immune hydrops fetalis                                  |
| 17 | 64335  | L263000 | Fetal distress unspecified                                  |
| 18 | 23590  | L300.00 | Obstructed labour due to fetal malposition                  |
| 19 | 102073 | Q410z00 | Fetal blood loss NOS                                        |
| 20 | 53687  | 2752    | O/E - fetal movements seen                                  |
| 21 | 42093  | 5846    | U-S scan - fetal maturity                                   |
| 22 | 3620   | Q214.00 | Liveborn with fetal distress, unspecified                   |
| 23 | 63024  | 2726    | O/E -fetal presentation unsure                              |
| 24 | 104845 | Q410700 | Fetal exsanguination                                        |
| 25 | 59679  | 276Z.00 | O/E - fetal heart NOS                                       |
| 26 | 100297 | L22zz00 | Fetal malposition and malpresentation NOS                   |
| 27 | 34777  | Q10..00 | Slow fetal growth and fetal malnutrition                    |
| 28 | 98499  | L25z300 | Maternal care for suspect fetal abnormal and damage, unspec |
| 29 | 96222  | L25z400 | Maternal care for fetal abnormality and damage, unspecified |
| 30 | 41908  | Q3z..00 | Fetal or newborn respiratory problems NOS                   |
| 31 | 28184  | Q436z00 | Unspecified fetal or neonatal jaundice NOS                  |
| 32 | 11589  | 7F25100 | Fetal heart monitoring in labour                            |
| 33 | 35680  | Q423.00 | Hydrops fetalis due to isoimmunisation                      |
| 34 | 45439  | Lyu3900 | [X]Maternal care/oth spcf known or suspected fetal problems |
| 35 | 12013  | L268000 | Reduced fetal movements                                     |
| 36 | 19581  | Q436.00 | Fetal and neonatal jaundice, unspecified                    |
| 37 | 32184  | L267500 | Other fetal problems                                        |
| 38 | 68996  | 2765    | O/E - fetal heart 100-120                                   |
| 39 | 62903  | 2767    | O/E - fetal heart 160-180                                   |
| 40 | 70845  | Z271E00 | Sinusoidal pattern of fetal heart                           |
| 41 | 52308  | Q211.00 | Fetal death due to labour anoxia                            |
| 42 | 101119 | 2769    | O/E - fetal heart > 200                                     |
| 43 | 27868  | 2761    | O/E - fetal heart not heard                                 |
| 44 | 39218  | 5858200 | Ultrasonic doppler for fetal heart sounds                   |
| 45 | 2437   | 2751    | O/E - no fetal movements                                    |
| 46 | 13276  | L263.00 | Fetal distress - affecting management                       |
| 47 | 49294  | L26..00 | Other fetal and placental problems                          |
| 48 |        |         |                                                             |
| 49 |        |         |                                                             |
| 50 |        |         |                                                             |
| 51 |        |         |                                                             |
| 52 |        |         |                                                             |
| 53 |        |         |                                                             |
| 54 |        |         |                                                             |
| 55 |        |         |                                                             |
| 56 |        |         |                                                             |
| 57 |        |         |                                                             |
| 58 |        |         |                                                             |
| 59 |        |         |                                                             |
| 60 |        |         |                                                             |

|    |        |         |                                                             |
|----|--------|---------|-------------------------------------------------------------|
| 1  |        |         |                                                             |
| 2  |        |         |                                                             |
| 3  |        |         |                                                             |
| 4  | 41919  | 5849    | U-S scan - fetal presentation                               |
| 5  | 72159  | 5845    | U-S scan - fetal cephalometry                               |
| 6  | 91933  | Q410000 | Fetal blood loss, unspecified                               |
| 7  | 85992  | 7F27.00 | Non routine obstetric scan for fetal observations           |
| 8  | 95538  | Z271B00 | Poor baseline variability in fetal heart rate               |
| 9  | 36195  | L268.00 | Other fetal problems                                        |
| 10 | 8147   | L264.11 | Fetal death in utero                                        |
| 11 | 94785  | 9Nk3.00 | Seen in fetal medicine clinic                               |
| 12 | 91477  | 7F03300 | Percutaneous insertion of fetal pleural drain               |
| 13 | 19720  | 7F25.11 | Fetal monitoring                                            |
| 14 | 983    | Q....11 | Fetal and neonatal conditions                               |
| 15 | 26710  | 272..00 | O/E - fetal presentation                                    |
| 16 | 45963  | 5847    | U-S scan - fetal abnormality                                |
| 17 | 46413  | L250.12 | Suspect fetal hydrocephaly                                  |
| 18 | 48801  | Q41..00 | Fetal and neonatal haemorrhage                              |
| 19 | 95875  | 7F27z00 | Non routine obstetric scan for fetal observations NOS       |
| 20 | 39868  | Q420.11 | Erythroblastosis fetalis                                    |
| 21 | 50201  | Q31..00 | Other fetal and newborn respiratory conditions              |
| 22 | 55607  | Z271900 | Fetal heart rate variability                                |
| 23 | 47149  | Z271F00 | Fetal heart deceleration                                    |
| 24 | 102894 | L260z00 | Fetal-maternal haemorrhage NOS                              |
| 25 | 91773  | Z271A00 | Good baseline variability in fetal heart rate               |
| 26 | 46502  | Q21..12 | Labour fetal anoxia                                         |
| 27 | 46431  | 7F04100 | Percutaneous sampling of fetal blood                        |
| 28 | 9501   | 7F25000 | Fetal heart monitoring NEC                                  |
| 29 | 19582  | Q493.00 | Persistent fetal circulation                                |
| 30 | 7681   | 276..00 | O/E - fetal heart heard                                     |
| 31 | 62316  | L51..00 | Maternal care for other known or suspected fetal problems   |
| 32 | 53420  | L263.13 | Fetal tachycardia                                           |
| 33 | 54004  | 7F03000 | Percutaneous insertion of fetal vesicoamniotic shunt        |
| 34 | 34132  | Q212.11 | Fetal distress before labour - liveborn                     |
| 35 | 42322  | Q213.00 | Liveborn with labour fetal distress                         |
| 36 | 20320  | Q210.00 | Fetal death due to prelabour anoxia                         |
| 37 | 107794 | 4H7Z.00 | Amniotic fetal cell study NOS                               |
| 38 | 106136 | Q410200 | Fetal placental blood loss                                  |
| 39 | 66335  | L260.00 | Fetal-maternal haemorrhage                                  |
| 40 | 53863  | L263z00 | Fetal distress NOS                                          |
| 41 | 41102  | L263500 | Lab+del comp fetal ht rate anom wth meconium in amnio fluid |
| 42 | 35214  | Z271912 | FHRV - Fetal heart rate variability                         |
| 43 | 26401  | Q214.11 | Fetal distress, unspecified when, liveborn                  |
| 44 | 54687  | L51X.00 | Maternal care/known or suspected fetal problem,unspecifd    |
| 45 | 37752  | 62O3.00 | Fetal maturity: dates = size                                |
| 46 | 55493  | 62O2.00 | Fetal movements seen                                        |
| 47 | 52857  | 275Z.00 | O/E - fetal movements NOS                                   |
| 48 | 110134 | Z271G00 | Early fetal heart deceleration                              |
| 49 |        |         |                                                             |
| 50 |        |         |                                                             |
| 51 |        |         |                                                             |
| 52 |        |         |                                                             |
| 53 |        |         |                                                             |
| 54 |        |         |                                                             |
| 55 |        |         |                                                             |
| 56 |        |         |                                                             |
| 57 |        |         |                                                             |
| 58 |        |         |                                                             |
| 59 |        |         |                                                             |
| 60 |        |         |                                                             |

|    |        |         |                                                              |
|----|--------|---------|--------------------------------------------------------------|
| 1  |        |         |                                                              |
| 2  |        |         |                                                              |
| 3  |        |         |                                                              |
| 4  | 13299  | Q42X.00 | Hydrops fetalis due to other+unspcfd haemolytic disease      |
| 5  | 100342 | PK81.00 | Fetal hydantoin syndrome                                     |
| 6  | 50913  | P7z..11 | Fetal circulation                                            |
| 7  | 51372  | Q311z11 | Pneumonitis due to fetal aspiration                          |
| 8  | 97985  | Z271H00 | Late fetal heart deceleration                                |
| 9  | 95649  | L263.11 | Fetal acidosis                                               |
| 10 | 48784  | 62O4.00 | Fetal maturity: dates not=size                               |
| 11 | 66428  | Q026.11 | Fetus affected by cord problems                              |
| 12 | 1017   | Q034.00 | Fetus or neonate affected by caesarean section               |
| 13 | 97885  | 7F01000 | Fetoscopic examination of fetus and biopsy of fetus          |
| 14 | 47151  | L220.00 | Fetus - unstable lie                                         |
| 15 | 97186  | 7F03z00 | Therapeutic percutaneous operation on fetus NOS              |
| 16 | 26685  | Q035600 | Fetus/neonate affected by other maternal opiates in lab/del  |
| 17 | 62776  | Q037.11 | Fetus or neonate affected by hypertonic labour               |
| 18 | 5538   | Q024.00 | Fetus or neonate affected by prolapsed cord                  |
| 19 | 91659  | Q022.00 | Fetus/neonate affected by placental abnormality NEC          |
| 20 | 105625 | Q027.00 | Fetus or neonate affected by chorioamnionitis                |
| 21 | 72118  | L257.00 | Fetus with damage due to intra-uterine contraceptive device  |
| 22 | 52007  | L255.00 | Fetus with drug damage                                       |
| 23 | 73892  | Q00z.00 | Fetus or neonate affected by maternal medical problem NOS    |
| 24 | 67326  | Q04X.00 | Fetus+newborn affected/other maternal noxious influences     |
| 25 | 69257  | L25y000 | Fetus with other damage NEC, unspecified                     |
| 26 | 71987  | Q007A00 | Fetus/neonate affect-plac./breast transf hypoglycaemic agent |
| 27 | 63290  | Q101.00 | Fetus small-for-dates with signs of malnutrition             |
| 28 | 52669  | Q031200 | Fetus/neonate affect persistent occip-posterior - labour/del |
| 29 | 61063  | L25zz00 | Fetus with damage NOS                                        |
| 30 | 99136  | Q021200 | Fetus/neonate affected by placental damage-amniocentesis     |
| 31 | 45440  | 7F00.00 | Therapeutic fetoscopic operations on fetus                   |
| 32 | 30979  | 7N61200 | [SO]Fetus                                                    |
| 33 | 69435  | 7F02z00 | Selective destruction of fetus NOS                           |
| 34 | 61452  | 7F0z.00 | Fetus and gravid uterus operations NOS                       |
| 35 | 46724  | Q022200 | Fetus or neonate affected by placental insufficiency         |
| 36 | 105097 | L250300 | Maternal care for suspected CNS malformation in fetus        |
| 37 | 52633  | Q021111 | Fetus affected by placental abruption                        |
| 38 | 36894  | Q100.11 | Fetus small-for-dates (SFD), without mention of malnutrition |
| 39 | 94808  | Q017600 | Fetus or neonate affected by face presentation before labour |
| 40 | 103741 | 7F2A211 | Doppler ultrasound scan of middle cerebral artery of fetus   |
| 41 | 51177  | L5...00 | Maternal care for fetus                                      |
| 42 | 106508 | 7F03600 | Percutaneous laser ablation of lesion of fetus               |
| 43 | 44173  | 5391    | Obstetric X-ray - fetus                                      |
| 44 | 38864  | L160.00 | Papyraceous fetus                                            |
| 45 | 48156  | Q025000 | Fetus or neonate affected by cord round neck                 |
| 46 | 59236  | L25z.00 | Fetus with damage NOS                                        |
| 47 | 53074  | L251z00 | Fetus with chromosomal abnormality NOS                       |
| 48 | 66699  | PK83.00 | Fetus and newborn affected by maternal use of alcohol        |
| 49 |        |         |                                                              |
| 50 |        |         |                                                              |
| 51 |        |         |                                                              |
| 52 |        |         |                                                              |
| 53 |        |         |                                                              |
| 54 |        |         |                                                              |
| 55 |        |         |                                                              |
| 56 |        |         |                                                              |
| 57 |        |         |                                                              |
| 58 |        |         |                                                              |
| 59 |        |         |                                                              |
| 60 |        |         |                                                              |

|    |        |         |                                                              |
|----|--------|---------|--------------------------------------------------------------|
| 1  |        |         |                                                              |
| 2  |        |         |                                                              |
| 3  |        |         |                                                              |
| 4  | 66571  | Qyu5200 | [X]Oth intracranial(nontraumatic)haemorrhages/fetus+newborn  |
| 5  | 31923  | Q021300 | Fetus/neonate affected by placental damage-caesarean section |
| 6  | 72366  | 7F02y00 | Other specified selective destruction of fetus               |
| 7  | 62819  | 7F04z00 | Diagnostic percutaneous examination of fetus NOS             |
| 8  | 72973  | Qyu5500 | [X]Other haemolytic diseases of fetus and newborn            |
| 9  | 45653  | Q025.00 | Fetus or neonate affected by other cord compression          |
| 10 | 23483  | Q023.00 | Fetus or neonate affected by placental transfusion syndrome  |
| 11 | 97240  | Q027100 | Fetus or neonate affected by amnionitis                      |
| 12 | 72834  | Q41z.00 | Haemorrhage of fetus and newborn NOS                         |
| 13 | 52950  | Q013.00 | Fetus or neonate affected by maternal polyhydramnios         |
| 14 | 41937  | 5848    | U-S scan - multiple fetus                                    |
| 15 | 63077  | Q00y.00 | Fetus or neonate affected by other maternal condition        |
| 16 | 34695  | L22..11 | Malpresentation of fetus                                     |
| 17 | 15495  | Q42z.00 | Haemolytic disease of fetus/newborn due isoimmunisation NOS  |
| 18 | 22032  | Q100.00 | Fetus small-for-dates, without mention of malnutrition       |
| 19 | 43005  | Q200012 | Intracranial haemorrhage in fetus or newborn                 |
| 20 | 36559  | Q200011 | Intracerebral haemorrhage in fetus or newborn                |
| 21 | 71279  | L250000 | Fetus with central nervous system malformation unspecified   |
| 22 | 40870  | Q020.00 | Fetus or neonate affected by placenta previa                 |
| 23 | 85238  | Qyu5F00 | [X]Intracranial nontraumatic haemorrhage fetus newborn unsp  |
| 24 | 106959 | Qyu0200 | [X]Fetus and newborn affected by other maternal conditions   |
| 25 | 46283  | 7F0..00 | Fetus and gravid uterus operations                           |
| 26 | 682    | Q42..00 | Haemolytic disease of fetus/newborn due to isoimmunisation   |
| 27 | 27334  | Q026z00 | Fetus or neonate affected by cord problems NOS               |
| 28 | 50530  | 7F0y.00 | Other specified operations on fetus or gravid uterus         |
| 29 | 28487  | Q....13 | Fetus and neonate conditions                                 |
| 30 | 71910  | Q037200 | Fetus or neonate affected by hypertonic uterine dysfunction  |
| 31 | 70737  | L25z000 | Fetus with damage NOS, unspecified                           |
| 32 | 56697  | Q041.00 | Fetus and newborn affect by mat use of nutritional chem subs |
| 33 | 54726  | L251400 | Maternal care for chromosomal abnormality in fetus           |
| 34 | 101599 | L253300 | Maternal care for damage to fetus from maternal rubella      |
| 35 | 101893 | L251300 | Maternal care for suspected chromosomal abnormality in fetus |
| 36 | 66526  | Q035200 | Fetus/neonate affected by mat general anaesthesia - lab/del  |
| 37 | 99890  | Q021400 | Fetus/neonate affect by placental damage-surgical induction  |
| 38 | 44479  | Q200511 | Intracerebral haematoma in fetus or newborn                  |
| 39 | 47219  | Q035300 | Fetus/neonate affected by mat epidural anaesth - labour/del  |
| 40 | 52526  | Q200600 | Extradural haemorrhage in fetus or newborn                   |
| 41 | 105735 | Q007B00 | Fetus/neonate affected-plac./breast transfer endocrine agent |
| 42 | 21382  | 27B..00 | O/E - viable fetus                                           |
| 43 | 100241 | L25y.00 | Fetus with other damage NEC                                  |
| 44 | 26840  | Q017500 | Fetus or neonate affected by unstable lie before labour      |
| 45 | 95128  | 9d06.00 | Fetus                                                        |
| 46 | 26631  | Q000.00 | Fetus or neonate affected by maternal hypertensive disease   |
| 47 | 73317  | L252.00 | Fetus with hereditary disease                                |
| 48 | 48583  | Q031600 | Fetus/neonate affected by disproportion during labour/delive |
| 49 |        |         |                                                              |
| 50 |        |         |                                                              |
| 51 |        |         |                                                              |
| 52 |        |         |                                                              |
| 53 |        |         |                                                              |
| 54 |        |         |                                                              |
| 55 |        |         |                                                              |
| 56 |        |         |                                                              |
| 57 |        |         |                                                              |
| 58 |        |         |                                                              |
| 59 |        |         |                                                              |
| 60 |        |         |                                                              |

|    |        |         |                                                              |
|----|--------|---------|--------------------------------------------------------------|
| 1  |        |         |                                                              |
| 2  |        |         |                                                              |
| 3  |        |         |                                                              |
| 4  | 71637  | Q017.11 | Fetus affected by malpresentation                            |
| 5  | 71495  | L250z00 | Fetus with central nervous system malformation NOS           |
| 6  | 60841  | Q013.11 | Fetus affected by hydramnios                                 |
| 7  | 55149  | Qyu0100 | [X]Fetus+newborn affectd/oth medical procedure on mother,NEC |
| 8  |        |         |                                                              |
| 9  | 100666 | L252z00 | Fetus with hereditary disease NOS                            |
| 10 | 66748  | Qyu0C00 | [X]Fetus+newborn affected/other maternal noxious influences  |
| 11 | 43958  | Q023000 | Fetus/neonate affected by twin-to-twin transplacental transf |
| 12 | 23617  | L22..00 | Malposition and malpresentation of fetus                     |
| 13 | 68016  | L253.11 | Fetus with suspected rubella damage via mother               |
| 14 | 65716  | Q011.00 | Fetus/neonate affected maternal premature rupture membrane   |
| 15 | 20721  | 7F0..11 | Fetus operations                                             |
| 16 |        |         |                                                              |
| 17 | 59580  | 7F0..12 | Fetus & gravid uterus ops                                    |
| 18 | 72558  | Q016.00 | Fetus or neonate affected by maternal death                  |
| 19 |        |         |                                                              |
| 20 | 38043  | Q200500 | Cerebral haematoma in fetus or newborn                       |
| 21 | 52299  | Q007200 | Fetus/neonate affected by placental/breast transfer narcotic |
| 22 | 68169  | Q021.00 | Fetus/neonate affect other placental separation/haemorrhage  |
| 23 | 37055  | Q035500 | Fetus/neonate affected by maternal pethidine in labour/deliv |
| 24 | 16963  | 7F00000 | Fetoscopic blood transfusion of fetus                        |
| 25 |        |         |                                                              |
| 26 | 61596  | Q017300 | Fetus or neonate affected by oblique lie before labour       |
| 27 | 55761  | Q021500 | Fetus or neonate affected by premature placental separation  |
| 28 | 44644  | L250.00 | Fetus with central nervous system malformation               |
| 29 | 58187  | Lyu4500 | [X]Obstructed labour due to other abnormalities of fetus     |
| 30 | 108080 | Qyu0.00 | [X]Fetus/newborn affected by maternal factors+complications  |
| 31 | 91434  | L251.12 | Suspect mongol fetus                                         |
| 32 | 42661  | Q021011 | Fetus affected by APH - antepartum haemorrhage               |
| 33 | 63309  | Q037312 | Fetus/neonate affected by uterine dysfunction in labour/del  |
| 34 | 95638  | Q101.11 | Fetus small-for-dates (SFD) with signs of malnutrition       |
| 35 | 69015  | L251.11 | Suspect cystic fibrosis fetus                                |
| 36 | 64430  | Q007C00 | Fetus/neonate affected-plac./breast transfer addictive drug  |
| 37 | 59171  | Q017400 | Fetus or neonate affected by transverse lie before labour    |
| 38 | 57828  | 7F03200 | Percutaneous blood transfusion of fetus                      |
| 39 | 24701  | 2754    | O/E - fetus very active                                      |
| 40 | 72833  | Q02z.00 | Fetus/neonate affected by abnormalities chorion/amnion NOS   |
| 41 | 104029 | Qyu0B00 | [X]Fetus and newborn affected by other maternal medication   |
| 42 | 70901  | Q023100 | Fetus/neonate affected by feto-maternal transplacental trans |
| 43 | 7103   | Q000.11 | Fetus affected by maternal toxemia                           |
| 44 | 109421 | Q03y400 | Fetus or neonate affected by long labour                     |
| 45 | 20544  | Q031611 | Fetus/neonate affected-cephalopelvic disproportion lab./del. |
| 46 | 99563  | 27A..11 | O/E - VE - descent of fetus                                  |
| 47 | 50555  | Q012.00 | Fetus or neonate affected by maternal oligohydramnios        |
| 48 | 101603 | Q010.00 | Fetus or neonate affected by maternal incompetent cervix     |
| 49 | 72348  | Q007800 | Fetus/neonate affected-plac./breast transfer chemotherapy    |
| 50 | 30692  | L251.00 | Fetus with chromosomal abnormality                           |
| 51 | 45856  | Q002.00 | Fetus or neonate affected by maternal infections             |
| 52 | 49959  | Q005.00 | Fetus or neonate affected by maternal injury                 |
| 53 |        |         |                                                              |
| 54 |        |         |                                                              |
| 55 |        |         |                                                              |
| 56 |        |         |                                                              |
| 57 |        |         |                                                              |
| 58 |        |         |                                                              |
| 59 |        |         |                                                              |
| 60 |        |         |                                                              |

|        |         |                                                              |
|--------|---------|--------------------------------------------------------------|
| 93329  | Q007400 | Fetus/neonate affected-placental/breast transfer anti-infect |
| 72729  | L253.00 | Fetus with viral damage via mother                           |
| 63648  | Q021000 | Fetus/neonate affected by antepartum haemorrhage unspecified |
| 96742  | Q007300 | Fetus/neonate affected-placenta/breast transfer hallucinogen |
| 68851  | Q00..00 | Fetus or neonate affected by maternal medical problems       |
| 54690  | L250400 | Maternal care for CNS malformation in fetus                  |
| 108565 | Qyu0700 | [X]Fetus+newborn affectd/oth+unspcfd conditns/umbilical cord |
| 108626 | Qyu7.00 | [X]Digestive system disorders of fetus and newborn           |
| 38660  | Q3...00 | Fetus and newborn respiratory conditions                     |
| 42226  | Q017200 | Fetus or neonate affected by external version before labour  |
| 71951  | Q037300 | Fetus or neonate affected by uterine inertia or dysfunction  |
| 71552  | L235.00 | Large fetus causing disproportion                            |
| 67572  | Q031000 | Fetus/neonate affected by mat bony pelvis abn in labour/del  |
| 65059  | Qyu5.00 | [X]Haemorrhagic+haematolog disorders of fetus and newborn    |
| 68687  | L266300 | Suspected macroscopic fetus                                  |
| 52726  | Q031500 | Fetus/neonate affected by face presentation during labour/de |
| 27447  | Q031z00 | Fetus/neonate affected by malposition/disproportion NOS      |
| 54311  | Q02..00 | Fetus/neonate affected by complic of placenta/cord/membrane  |
| 100074 | 7F01.00 | Diagnostic endoscopic examination of fetus using fetoscope   |
| 101984 | 7F03.00 | Therapeutic percutaneous operations on fetus                 |
| 70393  | 7F04.00 | Diagnostic percutaneous examination of fetus                 |
| 102078 | Q027z00 | Fetus or neonate affected by chorioamnionitis                |
| 58773  | Q026.00 | Fetus or neonate affected by other specified cord problems   |
| 102535 | 7F00.12 | Therapeutic foetoscopic operations on fetus                  |
| 35777  | Q417.00 | Intracranial nontraumatic haemorrhage of fetus and newborn   |
| 31496  | Q007900 | Fetus/neonate affected-plac./breast transfer uterine depress |
| 107153 | Q007x00 | Fetus/neonate affected - placental/breast transfer toxic NEC |
| 40376  | PH11.00 | Harlequin fetus                                              |
| 56666  | L256.00 | Fetus with radiation damage                                  |
| 73323  | L254.00 | Fetus with damage due to other maternal disease              |
| 73373  | Q001.00 | Fetus or neonate affected by maternal renal/urinary disease  |
| 96331  | L258.00 | Fetus with cardiovascular abnormality                        |
| 105261 | Q007500 | Fetus/neonate affected-placental/breast transfer immune sera |
| 57651  | 7F02.00 | Selective destruction of fetus                               |
| 97611  | 7F03400 | Percutaneous insertion of bladder drain to fetus             |
| 108731 | 7F03y00 | Other specified therapeutic percutaneous operation on fetus  |
| 70074  | Q3y..00 | Other specified respiratory problems in fetus or neonate     |
| 69814  | Q022000 | Fetus or neonate affected by placental dysfunction           |
| 69533  | L257.12 | Fetus with damage due to intra-uterine contraceptive device  |
| 95909  | Q026400 | Fetus or neonate affected by vasa praevia of cord            |
| 55410  | L251000 | Fetus with chromosomal abnormality unspecified               |
| 37180  | 272..11 | O/E - lie of fetus                                           |
| 69076  | Q031300 | Fetus/neonate affected by shoulder presentation - labour/del |
| 61640  | L252000 | Fetus with hereditary disease unspecified                    |
| 96614  | Q035100 | Fetus/neonate affected by mat analgesic agent in labour/del  |



|    |        |         |                                                              |
|----|--------|---------|--------------------------------------------------------------|
| 1  |        |         |                                                              |
| 2  |        |         |                                                              |
| 3  |        |         |                                                              |
| 4  | 42213  | Q021100 | Fetus or neonate affected by abruptio placentae              |
| 5  | 104989 | Q018.00 | Fetus or neonate affected by maternal postnatal depression   |
| 6  | 70739  | L25yz00 | Fetus with other damage NEC NOS                              |
| 7  | 42384  | Q031400 | Fetus or neonate affected by transverse lie in labour/deliv  |
| 8  | 72757  | Q007100 | Fetus/neonate affected by placental/breast transfer alcohol  |
| 9  | 51296  | Q03y200 | Fetus or neonate affected by induction of labour             |
| 10 | 111265 | Qyu6.00 | [X]Transitory endocr & metab disord specif to fetus/newborn  |
| 11 | 59070  | Q037.00 | Fetus or neonate affected by abnormal uterine contractions   |
| 12 | 97745  | Q007600 | Fetus/neonate affected-plac./breast transfer anticonvulsant  |
| 13 | 27670  | L255300 | Maternal care for (suspected) damage to fetus from alcohol   |
| 14 | 92824  | Q031z11 | Fetus or neonate affected by obstructed labour NEC           |
| 15 | 99473  | Q007.00 | Fetus/neonate affected by poison transferred placenta/breast |
| 16 | 50940  | 5391.11 | Fetus - abdominal X-ray, obst.                               |
| 17 | 72836  | Q007w00 | Fetus/neonate affected-placenta/breast transfer medicine NEC |
| 18 | 97923  | Q025200 | Fetus or neonate affected by knot in cord                    |
| 19 | 68577  | Q037100 | Fetus or neonate affected by hypertonic labour               |
| 20 | 70165  | Q016.11 | Fetus affected by maternal death                             |
| 21 | 107075 | L043z11 | Unspecified inevitable miscarriage without complication      |
| 22 | 94976  | L044x11 | Incomplete inevitable miscarriage with unspecified comp      |
| 23 | 17625  | L044.11 | Inevitable miscarriage incomp                                |
| 24 | 55404  | L045z11 | Complete inevitable miscarriage without complication         |
| 25 | 12241  | L02..11 | Missed miscarriage                                           |
| 26 | 107604 | L045211 | Complete inevitable miscarriage complicated by embolism      |
| 27 | 53836  | L044z11 | Incomplete inevitable miscarriage without complication       |
| 28 | 96949  | L02..12 | Silent miscarriage                                           |
| 29 | 11323  | L045.11 | Inevitable miscarriage complete                              |
| 30 | 108742 | L045x11 | Complete inevitable miscarriage with unspecified comp        |
| 31 | 109228 | L043y11 | Unspecified inevitable miscarriage with OS complication      |
| 32 | 11234  | L043.11 | Inevitable miscarriage unspecified                           |
| 33 | 92284  | L044y11 | Incomplete inevitable miscarriage with other specified comp  |
| 34 | 48603  | L040900 | Inevitable miscarriage                                       |
| 35 | 99578  | L043x11 | Unspecified inevitable miscarriage with unspec complication  |
| 36 | 165    | L04..11 | Miscarriage                                                  |
| 37 | 57576  | L045y11 | Complete inevitable miscarriage with OS complication         |
| 38 | 3082   | L04..00 | Spontaneous abortion                                         |
| 39 | 2187   | L05..00 | Legally induced abortion                                     |
| 40 | 68740  | L041x00 | Incomplete spontaneous abortion with complication NOS        |
| 41 | 63778  | L042x00 | Complete spontaneous abortion with complication NOS          |
| 42 | 69183  | L052100 | Complete legal abortion with delayed/excessive haemorrhage   |
| 43 | 102820 | L050200 | Unspecified legal abortion + damage to pelvic organs/tissues |
| 44 | 41098  | L050x00 | Unspecified legal abortion with complication NOS             |
| 45 | 106524 | L071100 | Unspecified incomplete abortion + delayed/excess haemorrhage |
| 46 | 25883  | L071y00 | Unspecified incomplete abortion + no mention of complication |
| 47 | 99736  | L042000 | Complete spontaneous abortion + genital tract/pelvic infect  |
| 48 | 99590  | L052w00 | Complete legal abortion with other specified complication    |
| 49 |        |         |                                                              |
| 50 |        |         |                                                              |
| 51 |        |         |                                                              |
| 52 |        |         |                                                              |
| 53 |        |         |                                                              |
| 54 |        |         |                                                              |
| 55 |        |         |                                                              |
| 56 |        |         |                                                              |
| 57 |        |         |                                                              |
| 58 |        |         |                                                              |
| 59 |        |         |                                                              |
| 60 |        |         |                                                              |

|    |        |         |                                                              |
|----|--------|---------|--------------------------------------------------------------|
| 1  |        |         |                                                              |
| 2  |        |         |                                                              |
| 3  | 69190  | L052000 | Complete legal abortion + genital tract or pelvic infection  |
| 4  | 3874   | L031200 | Tubal abortion                                               |
| 5  | 56325  | L042y00 | Complete spontaneous abortion + no mention of complication   |
| 6  | 99955  | L040400 | Unspecified spontaneous abortion with metabolic disorder     |
| 7  | 60771  | L05..11 | Elective abortion                                            |
| 8  | 31431  | L05..13 | Therapeutic abortion                                         |
| 9  | 95625  | L044200 | Incomplete inevitable abortion complicated by embolism       |
| 10 | 40258  | L040011 | Spontaneous abortion with sepsis                             |
| 11 | 72593  | L044x00 | Incomplete inevitable abortion with unspecified complication |
| 12 | 49467  | L06..12 | Self-induced abortion                                        |
| 13 | 71289  | L06..11 | Criminal abortion                                            |
| 14 | 25605  | L100z00 | Threatened abortion NOS                                      |
| 15 | 58137  | L07z.00 | Unspecified abortion NOS                                     |
| 16 | 1886   | L072.00 | Unspecified abortion complete                                |
| 17 | 70643  | L070.00 | Unspecified abortion                                         |
| 18 | 56828  | L041w00 | Incomp spontaneous abortion + other specified complication   |
| 19 | 28605  | L051z00 | Incomplete legal abortion NOS                                |
| 20 | 38415  | L050z00 | Unspecified legal abortion NOS                               |
| 21 | 97991  | L062w00 | Complete illegal abortion with other specified complication  |
| 22 | 2034   | L10zz11 | Inevitable abortion                                          |
| 23 | 56224  | L070z00 | Unspecified abortion NOS                                     |
| 24 | 94404  | L061z00 | Incomplete illegal abortion NOS                              |
| 25 | 104747 | L040x00 | Unspecified spontaneous abortion with complication NOS       |
| 26 | 8173   | L043.00 | Inevitable abortion unspecified                              |
| 27 | 105470 | L040500 | Unspecified spontaneous abortion with shock                  |
| 28 | 102090 | L08y.00 | Failed attempted abortion with no mention of complication    |
| 29 | 68311  | L044y00 | Incomplete inevitable abortion with OS complication          |
| 30 | 9407   | 6776.11 | Abortion counselling                                         |
| 31 | 33501  | L045.00 | Inevitable abortion complete                                 |
| 32 | 1737   | L02..00 | Missed abortion                                              |
| 33 | 41606  | L06..00 | Illegally induced abortion                                   |
| 34 | 39470  | L08..00 | Failed attempted abortion                                    |
| 35 | 7413   | L041.00 | Spontaneous abortion incomplete                              |
| 36 | 1439   | L07..00 | Unspecified abortion                                         |
| 37 | 70384  | L050y00 | Unspecified legal abortion with no mention of complication   |
| 38 | 1879   | L071.00 | Unspecified abortion incomplete                              |
| 39 | 68938  | L040y00 | Unspec spontaneous abortion without mention of complication  |
| 40 | 49809  | LOA..00 | Failed attempted abortion                                    |
| 41 | 41783  | L041100 | Incomp spontaneous abortion + delayed/excessive haemorrhage  |
| 42 | 73445  | L050000 | Unspecified legal abortion + genital tract/pelvic infection  |
| 43 | 50612  | L052y00 | Complete legal abortion with no mention of complication      |
| 44 | 94359  | L042w00 | Complete spontaneous abortion + other specified complication |
| 45 | 68669  | L040w00 | Unspec spontaneous abortion + other specified complication   |
| 46 | 58085  | L052z00 | Complete legal abortion NOS                                  |
| 47 | 50903  | LOA2.00 | Failed medical abortion comp by delayed/excessive haem'ge    |
| 48 |        |         |                                                              |
| 49 |        |         |                                                              |
| 50 |        |         |                                                              |
| 51 |        |         |                                                              |
| 52 |        |         |                                                              |
| 53 |        |         |                                                              |
| 54 |        |         |                                                              |
| 55 |        |         |                                                              |
| 56 |        |         |                                                              |
| 57 |        |         |                                                              |
| 58 |        |         |                                                              |
| 59 |        |         |                                                              |
| 60 |        |         |                                                              |

|    |        |         |                                                              |
|----|--------|---------|--------------------------------------------------------------|
| 1  |        |         |                                                              |
| 2  |        |         |                                                              |
| 3  |        |         |                                                              |
| 4  | 33964  | L0A4.00 | Failed medical abortion, without complication                |
| 5  | 56822  | L050.00 | Legal abortion unspecified                                   |
| 6  | 51614  | L044z00 | Incomplete inevitable abortion without complication          |
| 7  | 41118  | L08z.00 | Failed attempted abortion NOS                                |
| 8  | 45806  | L070x00 | Unspecified abortion with complication NOS                   |
| 9  | 39754  | L051.11 | Medal abortion - incomplete                                  |
| 10 | 6730   | L051.12 | Surgical abortion - incomplete                               |
| 11 | 35184  | L071z00 | Unspecified incomplete abortion NOS                          |
| 12 | 105603 | L052500 | Complete legal abortion with shock                           |
| 13 | 107159 | L08x.00 | Failed attempted abortion with complication NOS              |
| 14 | 7817   | L042.00 | Spontaneous abortion complete                                |
| 15 | 106491 | L050100 | Unspecified legal abortion + delayed/excessive haemorrhage   |
| 16 | 66365  | L043y00 | Unspecified inevitable abortion with OS complication         |
| 17 | 47931  | L050w00 | Unspecified legal abortion with other specified complication |
| 18 | 47298  | L052.00 | Legal abortion complete                                      |
| 19 | 71529  | L060.00 | Illegal abortion unspecified                                 |
| 20 | 66561  | L062.00 | Illegal abortion complete                                    |
| 21 | 96418  | L06z.00 | Illegally induced abortion NOS                               |
| 22 | 56562  | L040z00 | Unspecified spontaneous abortion NOS                         |
| 23 | 47435  | L097200 | Readmission for retained produc of concept, illegal abortion |
| 24 | 72307  | L040000 | Unspec spontaneous abortion + genital tract/pelvic infection |
| 25 | 73443  | L051y00 | Incomplete legal abortion with no mention of complication    |
| 26 | 68936  | L051100 | Incomplete legal abortion + delayed or excessive haemorrhage |
| 27 | 96652  | L051w00 | Incomplete legal abortion with other specified complication  |
| 28 | 59084  | L071500 | Unspecified incomplete abortion with shock                   |
| 29 | 53229  | L060z00 | Unspecified illegal abortion NOS                             |
| 30 | 110905 | L070w00 | Unspecified abortion with other specified complication       |
| 31 | 29439  | L041z00 | Incomplete spontaneous abortion NOS                          |
| 32 | 21805  | L097300 | Readmission for retained produc of concept, unspec abortion  |
| 33 | 7114   | L044.00 | Inevitable abortion incomplete                               |
| 34 | 59572  | L0A3.00 | Failed medical abortion, complicated by embolism             |
| 35 | 22379  | L04z.00 | Spontaneous abortion NOS                                     |
| 36 | 59116  | L045x00 | Complete inevitable abortion with unspecified complication   |
| 37 | 12337  | L051.00 | Legal abortion incomplete                                    |
| 38 | 41379  | L052.11 | Medical abortion - complete                                  |
| 39 | 49849  | L052.12 | Surgical abortion - complete                                 |
| 40 | 906    | L100.00 | Threatened abortion                                          |
| 41 | 96598  | Z22CE00 | Number of induced abortions                                  |
| 42 | 29940  | L042z00 | Complete spontaneous abortion NOS                            |
| 43 | 94270  | L043x00 | Unspecified inevitable abortion with unspec complication     |
| 44 | 68511  | L040100 | Unspec spontaneous abortion + delayed/excessive haemorrhage  |
| 45 | 68110  | L043z00 | Unspecified inevitable abortion without complication         |
| 46 | 101218 | L051700 | Incomplete medical abortion                                  |
| 47 | 63777  | L045y00 | Complete inevitable abortion with OS complication            |
| 48 | 62659  | Lyu0200 | [X]Other abortion                                            |
| 49 |        |         |                                                              |
| 50 |        |         |                                                              |
| 51 |        |         |                                                              |
| 52 |        |         |                                                              |
| 53 |        |         |                                                              |
| 54 |        |         |                                                              |
| 55 |        |         |                                                              |
| 56 |        |         |                                                              |
| 57 |        |         |                                                              |
| 58 |        |         |                                                              |
| 59 |        |         |                                                              |
| 60 |        |         |                                                              |

|    |        |         |                                                              |
|----|--------|---------|--------------------------------------------------------------|
| 1  |        |         |                                                              |
| 2  |        |         |                                                              |
| 3  |        |         |                                                              |
| 4  | 101050 | L062000 | Complete illegal abortion + genital tract/pelvic infection   |
| 5  | 33770  | L05z.00 | Legally induced abortion NOS                                 |
| 6  | 101666 | L070300 | Unspecified abortion with renal failure                      |
| 7  | 105921 | L072y00 | Unspecified complete abortion + no mention of complication   |
| 8  | 107171 | L042100 | Complete spontaneous abortion +delayed/excessive haemorrhage |
| 9  | 42458  | L040.00 | Spontaneous abortion unspecified                             |
| 10 | 50653  | L041y00 | Incomp spontaneous abortion with no mention of complication  |
| 11 | 67076  | L052x00 | Complete legal abortion with complication NOS                |
| 12 | 4708   | 7E08800 | Dilation and curettage removal of missed abortion            |
| 13 | 30276  | L041z11 | Retained products after spontaneous abortion                 |
| 14 | 29594  | L072z00 | Unspecified complete abortion NOS                            |
| 15 | 23693  | L097100 | Readmission for retained produc of concept, legal abortion   |
| 16 | 35701  | L100000 | Threatened abortion unspecified                              |
| 17 | 33989  | L045z00 | Complete inevitable abortion without complication            |
| 18 | 45340  | L040111 | Spontaneous abortion with heavy bleeding                     |
| 19 | 102648 | 6776100 | Pre-termination counselling                                  |
| 20 | 17294  | 6776.13 | Termination counselling                                      |
| 21 | 100568 | 7F10y00 | Other specified surgical induction of labour                 |
| 22 | 96821  | Q212000 | Liveborn with prelabour abnormal heart beat                  |
| 23 | 23664  | 63E..00 | Labour details                                               |
| 24 | 97459  | L300700 | Obstructed labour due to compound presentation               |
| 25 | 64976  | Z243200 | First stage of labour not established                        |
| 26 | 73308  | L29z.00 | Problems affecting labour NOS                                |
| 27 | 66578  | L31..00 | Abnormal forces of labour                                    |
| 28 | 54127  | Z255.00 | Observation of second stage of labour                        |
| 29 | 109523 | L307000 | Other failed trial of labour unspecified                     |
| 30 | 102969 | Q213200 | Liveborn with labour meconium in liquor                      |
| 31 | 29434  | 63E3.00 | Normal labour                                                |
| 32 | 23316  | L140.11 | False labour                                                 |
| 33 | 72779  | L30z.00 | Obstructed labour NOS                                        |
| 34 | 67423  | Z23AG00 | Hypertonic lower uterine segment during labour               |
| 35 | 72736  | Z246200 | Onset of labour first stage                                  |
| 36 | 20809  | L14..00 | Early or threatened labour                                   |
| 37 | 3088   | 7F11.00 | Other induction of labour                                    |
| 38 | 108764 | L29y.00 | Other problems affecting labour                              |
| 39 | 23525  | L141.00 | Other threatened labour                                      |
| 40 | 34981  | 7F10z00 | Surgical induction of labour NOS                             |
| 41 | 64395  | Z255D00 | Ability to push in labour                                    |
| 42 | 70850  | Q212100 | Liveborn with prelabour hypoxia                              |
| 43 | 103105 | L293.00 | Septicaemia during labour                                    |
| 44 | 63287  | Z24..00 | Labour observations                                          |
| 45 | 83541  | Z243500 | Normal length of first stage of labour                       |
| 46 | 49302  | Z243100 | First stage of labour established                            |
| 47 | 33632  | 7F11200 | Syntocinon induction of labour                               |
| 48 | 93041  | Z246700 | Onset of second stage of labour                              |
| 49 |        |         |                                                              |
| 50 |        |         |                                                              |
| 51 |        |         |                                                              |
| 52 |        |         |                                                              |
| 53 |        |         |                                                              |
| 54 |        |         |                                                              |
| 55 |        |         |                                                              |
| 56 |        |         |                                                              |
| 57 |        |         |                                                              |
| 58 |        |         |                                                              |
| 59 |        |         |                                                              |
| 60 |        |         |                                                              |

|    |        |         |                                                             |
|----|--------|---------|-------------------------------------------------------------|
| 1  |        |         |                                                             |
| 2  |        |         |                                                             |
| 3  |        |         |                                                             |
| 4  | 64692  | L141z00 | Other threatened labour NOS                                 |
| 5  | 92738  | ZNA2300 | Does perform labouring activities                           |
| 6  | 36756  | L386.00 | Toxic reaction to local anaesthesia during labour and deliv |
| 7  | 49858  | Z23G.00 | Uterine observation in labour                               |
| 8  |        |         |                                                             |
| 9  | 64206  | L313z00 | Precipitate labour NOS                                      |
| 10 | 109569 | L313000 | Precipitate labour unspecified                              |
| 11 | 25428  | Z246211 | Start of labour                                             |
| 12 | 23674  | L291.11 | Failed medical induction of labour                          |
| 13 |        |         |                                                             |
| 14 | 87342  | Z244100 | Observation of duration of labour                           |
| 15 | 50876  | H472.00 | Asp pneumonitis due to anaesthesia during labour and deliv  |
| 16 | 93735  | Z246A00 | Total duration of labour                                    |
| 17 |        |         |                                                             |
| 18 | 71189  | Z244400 | Late onset of labour                                        |
| 19 | 22115  | 7F10.00 | Surgical induction of labour                                |
| 20 | 59789  | L14z.00 | Early or threatened labour NOS                              |
| 21 | 54167  | 6322    | 2nd stage of labour length                                  |
| 22 |        |         |                                                             |
| 23 | 44337  | L307.00 | Failed trial of labour unspecified                          |
| 24 | 32555  | L351000 | Rupture of uterus during and after labour unspecified       |
| 25 | 3004   | L14..11 | Premature labour                                            |
| 26 |        |         |                                                             |
| 27 | 30782  | 632Z.00 | Length of labour NOS                                        |
| 28 | 65867  | 7M35011 | Entonox analgesia in labour                                 |
| 29 | 23549  | L31z.00 | Abnormality of forces of labour NOS                         |
| 30 | 66242  | Z243400 | Rapid first stage of labour                                 |
| 31 |        |         |                                                             |
| 32 | 59445  | Z243800 | First stage of labour problem                               |
| 33 | 94809  | Z256200 | Prolonged third stage of labour                             |
| 34 | 99290  | Z255800 | Second stage of labour problem                              |
| 35 |        |         |                                                             |
| 36 | 40448  | 7F11100 | Induction of labour using prostaglandins                    |
| 37 | 56873  | ZNA2200 | Unable to perform labouring activities                      |
| 38 | 88775  | 7F11300 | Medical induction of labour                                 |
| 39 |        |         |                                                             |
| 40 | 40724  | Z255700 | Failure to progress in second stage of labour               |
| 41 | 45057  | 0Z3Z.00 | Other labourer NOS                                          |
| 42 | 95570  | L307z00 | Failed trial of labour NOS                                  |
| 43 | 64732  | Q213000 | Liveborn with labour abnormal heart beat                    |
| 44 |        |         |                                                             |
| 45 | 57002  | L290.11 | Failed mechanical induction of labour                       |
| 46 | 13215  | 632..00 | Length of labour                                            |
| 47 | 48484  | Z244500 | Relation of onset of labour to due date                     |
| 48 |        |         |                                                             |
| 49 | 49953  | 6323    | 3rd stage of labour length                                  |
| 50 | 33421  | 7F11000 | Oxytocic induction of labour                                |
| 51 | 35628  | L321.00 | Prolonged labour unspecified                                |
| 52 | 100252 | Z255J00 | Pushing involuntarily in labour                             |
| 53 |        |         |                                                             |
| 54 | 98422  | Q213100 | Liveborn with labour hypoxia                                |
| 55 | 63022  | L281500 | Prem rupture of membranes onset of labour after 24 hours    |
| 56 | 103000 | L29yz00 | Other problems affecting labour NOS                         |
| 57 |        |         |                                                             |
| 58 | 98003  | Z23B400 | Contraction of uterus during labour                         |
| 59 | 73319  | L302.00 | Obstructed labour caused by pelvic soft tissues             |
| 60 | 55225  | L32z.00 | Prolonged labour NOS                                        |

|    |        |         |                                                             |
|----|--------|---------|-------------------------------------------------------------|
| 1  |        |         |                                                             |
| 2  |        |         |                                                             |
| 3  |        |         |                                                             |
| 4  | 41036  | 7M35000 | Gas and air analgesia in labour                             |
| 5  | 104405 | Z256100 | Normal length of third stage of labour                      |
| 6  | 71720  | L350z00 | Rupture of uterus before labour NOS                         |
| 7  | 60124  | Z243411 | Rapid progress in first stage of labour                     |
| 8  | 71171  | L350000 | Rupture of uterus before labour unspecified                 |
| 9  | 106135 | Z244200 | Long duration of labour                                     |
| 10 | 94874  | Z244300 | Short duration of labour                                    |
| 11 | 103154 | L321z00 | Prolonged labour NOS                                        |
| 12 | 65243  | L141000 | Other threatened labour unspecified                         |
| 13 | 60255  | L351z00 | Rupture of uterus during and after labour NOS               |
| 14 | 99968  | L321000 | Unspecified prolonged labour, unspecified                   |
| 15 | 3272   | 7F11z00 | Other induction of labour NOS                               |
| 16 | 44306  | L126600 | Eclampsia in labour                                         |
| 17 | 48708  | Z244411 | Postmature labour                                           |
| 18 | 95354  | Z255300 | Progress of second stage of labour                          |
| 19 | 62622  | L30z000 | Obstructed labour NOS, unspecified                          |
| 20 | 108419 | L38X.00 | Complication of anaesthesia during labour and deliv unsp    |
| 21 | 40702  | Z243600 | Slow progress in first stage of labour                      |
| 22 | 37267  | L301400 | Obstructed labour due to generally contracted pelvis        |
| 23 | 61611  | 7F1A400 | Trial of labour NEC                                         |
| 24 | 22261  | Z241100 | Onset of labour induced                                     |
| 25 | 65900  | Z243300 | Progress of labour - first stage                            |
| 26 | 32997  | 6321    | 1st stage of labour length                                  |
| 27 | 29071  | 7L16000 | Intravenous induction of labour                             |
| 28 | 54596  | L140200 | False labour at or after 37 completed weeks of gestation    |
| 29 | 42101  | L140z00 | Threatened premature labour NOS                             |
| 30 | 32877  | L350.00 | Ruptured uterus before labour                               |
| 31 | 107198 | L292000 | Unspecified maternal pyrexia during labour, unspecified     |
| 32 | 97907  | L29..00 | Other problems affecting labour                             |
| 33 | 819    | L30..00 | Obstructed labour                                           |
| 34 | 24447  | 7F25.13 | Monitoring during labour                                    |
| 35 | 73331  | Z246900 | Duration of second stage of labour                          |
| 36 | 21626  | 63E1.00 | Spontaneous onset of labour                                 |
| 37 | 100563 | L302000 | Obstructed labour caused by pelvic soft tissues unspecified |
| 38 | 23548  | L301.00 | Obstructed labour caused by bony pelvis                     |
| 39 | 104746 | L302z00 | Obstructed labour caused by pelvic soft tissues NOS         |
| 40 | 48602  | L32..00 | Long labour                                                 |
| 41 | 36655  | Z245.00 | Observation of blood loss in labour                         |
| 42 | 99170  | Z243.00 | Observation of first stage of labour                        |
| 43 | 25112  | Z241.00 | Labour established                                          |
| 44 | 56915  | Z249.00 | Labour problem                                              |
| 45 | 62656  | Z255400 | Rapid second stage of labour                                |
| 46 | 94396  | L30zz00 | Obstructed labour NOS                                       |
| 47 | 29529  | L351.00 | Rupture of uterus during and after labour                   |
| 48 | 102136 | L292z00 | Unspecified maternal pyrexia during labour NOS              |
| 49 |        |         |                                                             |
| 50 |        |         |                                                             |
| 51 |        |         |                                                             |
| 52 |        |         |                                                             |
| 53 |        |         |                                                             |
| 54 |        |         |                                                             |
| 55 |        |         |                                                             |
| 56 |        |         |                                                             |
| 57 |        |         |                                                             |
| 58 |        |         |                                                             |
| 59 |        |         |                                                             |
| 60 |        |         |                                                             |

|    |        |         |                                                              |
|----|--------|---------|--------------------------------------------------------------|
| 1  |        |         |                                                              |
| 2  |        |         |                                                              |
| 3  | 40080  | 7F11y00 | Other specified other induction of labour                    |
| 4  | 46297  | Z246311 | Onset of labour pains                                        |
| 5  | 60333  | L301500 | Obstructed labour due to pelvic inlet contraction            |
| 6  | 85226  | Lyu4000 | [X]Other failed induction of labour                          |
| 7  |        |         |                                                              |
| 8  | 103056 | Z244.00 | Observation of pattern of labour                             |
| 9  | 64548  | L281300 | Prem rupture of membranes onset of labour within 24 hours    |
| 10 | 68319  | L351300 | Rupture of uterus during/after labour with postnatal problem |
| 11 | 62278  | L281400 | Premature rupture of membranes, labour delayed by therapy    |
| 12 | 22613  | Z248.00 | Normal labour                                                |
| 13 | 90775  | Z246.00 | Observation of measures of labour                            |
| 14 | 70150  | Z246100 | Duration of labour                                           |
| 15 | 28928  | L140.00 | Threatened premature labour                                  |
| 16 | 93205  | Z255F00 | Not pushing well in labour                                   |
| 17 | 99660  | L300400 | Obstructed labour due to face presentation                   |
| 18 | 48274  | Q212200 | Liveborn with prelabour meconium in liquor                   |
| 19 | 59296  | L140000 | Threatened premature labour unspecified                      |
| 20 | 9294   | L292.00 | Maternal pyrexia during labour, unspecified                  |
| 21 | 28830  | Z242.00 | Labour not established                                       |
| 22 | 104206 | L29z000 | Problems affecting labour NOS unspecified                    |
| 23 | 28700  | 7F1..11 | Labour operations                                            |
| 24 | 30001  | L313.00 | Precipitate labour                                           |
| 25 | 104716 | Z255E11 | Pushing well in labour                                       |
| 26 | 98918  | Z247100 | Expulsion of IUCD during third stage of labour               |
| 27 | 62600  | L29zz00 | Problems affecting labour NOS                                |
| 28 | 364    | 7F13111 | Lower uterine segment caesarean section (LSCS) NEC           |
| 29 | 13315  | 14Y0.00 | Born by caesarean section                                    |
| 30 | 13316  | 14Y6.00 | Born by emergency caesarean section                          |
| 31 | 29155  | 7F1A000 | Caesarean hysterectomy                                       |
| 32 | 10049  | 7F12111 | Elective lower uterine segment caesarean section (LSCS)      |
| 33 | 12118  | 7F13300 | Emergency caesarean section                                  |
| 34 | 72513  | 7F13200 | Extraperitoneal caesarean section                            |
| 35 | 15361  | 14Y2.00 | Born by elective caesarean section                           |
| 36 | 8192   | Q473.00 | Other hypothermia of newborn                                 |
| 37 | 3007   | Q316.00 | Newborn transitory tachypnoea                                |
| 38 | 100616 | ZV30100 | [V]Singleton, born before admission to hospital              |
| 39 | 93976  | Qyu4200 | [X]Other bacterial sepsis of newborn                         |
| 40 | 56336  | Q40A100 | Sepsis of newborn due to Escherichia coli                    |
| 41 | 66999  | Q474111 | Newborn environmental hyperthermia                           |
| 42 | 15985  | ZV32.00 | [V]Twin, mate stillborn                                      |
| 43 | 59878  | Q463.00 | Transitory ileus of newborn                                  |
| 44 | 10452  | 6333    | Twins - both live born                                       |
| 45 | 93999  | 6339    | Triplets - 3 still born                                      |
| 46 | 99418  | Q482.00 | Central nervous system dysfunction in newborn NOS            |
| 47 | 41064  | Q484.00 | Newborn drug reaction and intoxication                       |
| 48 | 56888  | Q483000 | Newborn feeding problem, unspecified                         |
| 49 |        |         |                                                              |
| 50 |        |         |                                                              |
| 51 |        |         |                                                              |
| 52 |        |         |                                                              |
| 53 |        |         |                                                              |
| 54 |        |         |                                                              |
| 55 |        |         |                                                              |
| 56 |        |         |                                                              |
| 57 |        |         |                                                              |
| 58 |        |         |                                                              |
| 59 |        |         |                                                              |
| 60 |        |         |                                                              |

|    |        |         |                                                              |
|----|--------|---------|--------------------------------------------------------------|
| 1  |        |         |                                                              |
| 2  |        |         |                                                              |
| 3  |        |         |                                                              |
| 4  | 13304  | Q480.12 | Seizures in newborn                                          |
| 5  | 53052  | Q425.00 | Late anaemia of newborn due to isoimmunisation               |
| 6  | 98857  | ZV31200 | [V]Twin, not hospitalised, mate live born                    |
| 7  | 38852  | Q311300 | Aspiration of vomit in newborn                               |
| 8  |        |         |                                                              |
| 9  | 104697 | G520000 | Acute aseptic myocarditis of the newborn                     |
| 10 | 55878  | Q494.00 | Transient myocardial ischaemia of newborn                    |
| 11 | 108976 | 6318    | Born in hospital                                             |
| 12 | 19577  | Q417100 | Cerebellar (nontraum) and post fossa haemorrhage fet newborn |
| 13 | 108501 | Q484z00 | Newborn drug reaction or intoxication NOS                    |
| 14 | 88204  | ZV30000 | [V]Singleton, born in hospital                               |
| 15 | 98669  | Qyu4100 | [X]Sepsis/newborn due to other+unspecified staphylococcus    |
| 16 | 15457  | Q482y00 | Other newborn abnormal cerebral signs                        |
| 17 | 21839  | Q480.11 | Fits in newborn                                              |
| 18 | 12085  | Q404.11 | Umbilical stump infection of the newborn                     |
| 19 | 72669  | Q452.00 | Newborn disseminated intravascular coagulation               |
| 20 | 20083  | Q450.00 | Haemorrhagic disease of the newborn                          |
| 21 | 38877  | R024z00 | [D]Jaundice (not of newborn) NOS                             |
| 22 | 8515   | Q31y111 | Cyanotic attacks of the newborn                              |
| 23 | 110616 | 6338    | Triplets-1 live+ 2 still born                                |
| 24 | 57128  | 6336    | Triplets - all live born                                     |
| 25 | 21468  | ZV29100 | [V]Newborn receiving special care                            |
| 26 | 14813  | Q481.00 | Newborn cerebral irritability, unspecified                   |
| 27 | 17482  | Q474211 | Thermal injury in newborn NEC                                |
| 28 | 47693  | Q40W.00 | Sepsis of newborn due to other+unspecified streptococci      |
| 29 | 98366  | Qyu4800 | [X]Sepsis of newborn due to other+unspecified streptococci   |
| 30 | 23015  | 6334    | Twins - 1 still + 1 live born                                |
| 31 | 106918 | Q44X.00 | Trans disorder carbohydrate metab of fet and newborn unsp    |
| 32 | 57783  | Q417000 | Intracerebral (nontraumatic) haemorrhage of fet and newborn  |
| 33 | 9477   | Q483.00 | Feeding problems in newborn                                  |
| 34 | 32703  | Q21z.12 | Hypoxia in newborn NOS                                       |
| 35 | 36071  | Q21z.11 | Anoxia in newborn NOS                                        |
| 36 | 70538  | Q475.00 | Oedema of newborn unspecified                                |
| 37 | 13300  | Q477.00 | Newborn breast engorgement                                   |
| 38 | 56476  | Q482z00 | Central nervous system dysfunction in newborn NOS            |
| 39 | 34502  | 6335    | Twins - both still born                                      |
| 40 | 63044  | ZV31z00 | [V]Twin, mate liveborn, NOS                                  |
| 41 | 19579  | Q448.00 | Newborn late metabolic acidosis                              |
| 42 | 90510  | Q44T.00 | Transitory metabolic disturbance of newborn, unspecified     |
| 43 | 64600  | Q042.00 | Fet newborn affect mat exposure to environml chem subs       |
| 44 | 89262  | Q474z00 | Newborn temperature regulation disorder NOS                  |
| 45 | 73978  | Qyu3800 | [X]Other apnoea of newborn                                   |
| 46 | 22031  | Q40y200 | Septicaemia of newborn                                       |
| 47 | 45750  | Q4z..13 | Newborn death                                                |
| 48 | 105039 | 44qW000 | Newborn blood spot screening                                 |
| 49 | 98938  | Qyu6C00 | [X]Transitory metabolic disturbance of newborn, unspecified  |
| 50 |        |         |                                                              |
| 51 |        |         |                                                              |
| 52 |        |         |                                                              |
| 53 |        |         |                                                              |
| 54 |        |         |                                                              |
| 55 |        |         |                                                              |
| 56 |        |         |                                                              |
| 57 |        |         |                                                              |
| 58 |        |         |                                                              |
| 59 |        |         |                                                              |
| 60 |        |         |                                                              |



|    |        |         |                                                              |
|----|--------|---------|--------------------------------------------------------------|
| 1  |        |         |                                                              |
| 2  |        |         |                                                              |
| 3  |        |         |                                                              |
| 4  | 19585  | Q483200 | Slow feeding in newborn                                      |
| 5  | 55895  | Q474200 | Hyperthermia in newborn, unspecified                         |
| 6  | 31476  | 9114.11 | FP58 - newborn registration                                  |
| 7  | 68065  | 9114.12 | GP58 - newborn registration                                  |
| 8  |        |         |                                                              |
| 9  | 104239 | Q48F.00 | Hypoxic ischaemic encephalopathy of newborn                  |
| 10 | 69413  | ZV33000 | [V]Twin, unspecified, born in hospital                       |
| 11 | 54589  | D400700 | Acquired neutropenia in newborn                              |
| 12 | 26871  | Q318.00 | Primary sleep apnoea of newborn                              |
| 13 |        |         |                                                              |
| 14 | 105139 | Qyu3700 | [X]Other and unspecified atelectasis of newborn              |
| 15 | 93859  | Qyu8400 | [X]Hypothermia of newborn, unspecified                       |
| 16 | 20478  | ZV27200 | [V]Twins, both live born                                     |
| 17 |        |         |                                                              |
| 18 | 42527  | Q42..11 | Isoimmunisation of newborn                                   |
| 19 | 98721  | P320011 | Newborn glaucoma                                             |
| 20 | 19947  | ZV31.00 | [V]Twin, mate live born                                      |
| 21 |        |         |                                                              |
| 22 | 97799  | Qyu3900 | [X]Other specified respiratory conditions of newborn         |
| 23 | 3613   | Q40A.00 | Sepsis of the newborn                                        |
| 24 | 109480 | 44qW100 | Completion of newborn blood spot screening card              |
| 25 | 40296  | Q46X.00 | Intestinal obstruction of newborn, unspecified               |
| 26 |        |         |                                                              |
| 27 | 39165  | Q483100 | Newborn regurgitation of food                                |
| 28 | 3615   | Q436200 | Newborn physiological jaundice NOS                           |
| 29 | 72352  | Q474300 | Transitory fever of newborn                                  |
| 30 |        |         |                                                              |
| 31 | 40867  | Q485100 | Withdrawal symptoms from therapeutic use of drugs in newborn |
| 32 | 61943  | Q483400 | Rumination in newborn                                        |
| 33 |        |         |                                                              |
| 34 | 5173   | Q421.11 | ABO isoimmunisation of the newborn                           |
| 35 | 5218   | 6316    | Born before arrival                                          |
| 36 | 56210  | Q311100 | Aspiration of liquor or mucus in newborn                     |
| 37 | 109128 | Qyu5100 | [X]Other umbilical haemorrhages of newborn                   |
| 38 | 108994 | 13lf000 | Unborn child is cause for safeguarding concern               |
| 39 |        |         |                                                              |
| 40 | 43366  | Q207011 | Phrenic nerve palsy in newborn                               |
| 41 | 52525  | Q462.00 | Newborn swallowing maternal blood - haematemesis/melaena     |
| 42 | 61729  | Q482100 | Coma in newborn                                              |
| 43 | 99425  | QyuA400 | [X]Disorder of muscle tone of newborn, unspecified           |
| 44 |        |         |                                                              |
| 45 | 47446  | Q474000 | Newborn dehydration fever                                    |
| 46 | 44256  | 9Ea4.00 | Unborn child at risk physi/ment abnormal serious handicap    |
| 47 | 61800  | Q437z00 | Kernicterus of newborn NOS                                   |
| 48 |        |         |                                                              |
| 49 | 104301 | 13lv000 | Unborn child subject to child protection plan                |
| 50 | 34504  | Q485.00 | Newborn drug withdrawal syndrome                             |
| 51 | 23876  | Q487.00 | Umbilical polyp of newborn                                   |
| 52 | 56909  | Q411200 | Intraventric (nontraumatic) haemorrhage grade 3 fet newborn  |
| 53 |        |         |                                                              |
| 54 | 41053  | Q483z11 | Bottle feeding problem in the newborn                        |
| 55 | 95873  | Q446600 | Disturbances of potassium balance of newborn                 |
| 56 | 52577  | Q483500 | Underfeeding in newborn                                      |
| 57 |        |         |                                                              |
| 58 | 28758  | ZV29200 | [V]Newborn receiving intensive care                          |
| 59 | 47227  | ZV27300 | [V]Twins, one live born and one stillborn                    |
| 60 | 38890  | ZV27400 | [V]Twins, both stillborn                                     |

|    |        |         |                                                             |
|----|--------|---------|-------------------------------------------------------------|
| 1  |        |         |                                                             |
| 2  |        |         |                                                             |
| 3  |        |         |                                                             |
| 4  | 44238  | ZV31000 | [V]Twin, born in hospital, mate live born                   |
| 5  | 50017  | Q472.00 | Newborn cold injury syndrome                                |
| 6  | 101103 | Q214200 | Liveborn with meconium liquor, unspecified                  |
| 7  | 109703 | 41G4.00 | Newborn blood spot specimen received                        |
| 8  |        |         |                                                             |
| 9  | 98336  | Q311113 | Aspiration of amniotic fluid in newborn                     |
| 10 | 64262  | Q311112 | Aspiration of liquor in newborn                             |
| 11 | 36845  | Q311111 | Aspiration of mucus in newborn                              |
| 12 | 73521  | QyuA200 | [X]Other disorders of muscle tone of newborn                |
| 13 | 72705  | QyuA000 | [X]Oth specified disturbances of cerebral status of newborn |
| 14 | 57674  | Q411100 | Intraventric (nontraumatic) haemorrhage grade 2 fet newborn |
| 15 | 65792  | Q484000 | Grey syndrome of newborn                                    |
| 16 |        |         |                                                             |
| 17 | 68254  | Q474100 | Newborn environmental pyrexia                               |
| 18 | 19576  | Q31y600 | Apnoea of newborn                                           |
| 19 |        |         |                                                             |
| 20 | 97418  | Q30..12 | Pulmonary hypoperfusion syndrome of newborn                 |
| 21 | 108359 | ZV30200 | [V]Singleton, born outside hospital and not hospitalised    |
| 22 | 101529 | ZV32z00 | [V]Twin, mate stillborn, NOS                                |
| 23 |        |         |                                                             |
| 24 | 86001  | ZV32000 | [V]Twin, born in hospital, mate stillborn                   |
| 25 | 95736  | Qyu8000 | [X]Other hypothermia of newborn                             |
| 26 |        |         |                                                             |
| 27 | 48664  | Q444111 | Hypocalcaemic tetany in newborn                             |
| 28 | 11509  | Q483300 | Vomiting in newborn                                         |
| 29 | 99244  | Q446500 | Disturbances of sodium balance of newborn                   |
| 30 | 19578  | Q483600 | Overfeeding in newborn                                      |
| 31 |        |         |                                                             |
| 32 | 39691  | Q40A000 | Sepsis of newborn due to Staphylococcus aureus              |
| 33 | 93597  | Q311200 | Aspiration of blood in newborn                              |
| 34 | 72704  | Qyu3000 | [X]Other respiratory distress of newborn                    |
| 35 |        |         |                                                             |
| 36 | 94759  | Q214000 | Liveborn with abnormal heart beat, unspecified              |
| 37 | 103401 | Q466111 | Intestinal obstruction in newborn due to faecoliths         |
| 38 | 104825 | Q453.00 | Other newborn transient coagulation defect                  |
| 39 |        |         |                                                             |
| 40 | 47317  | Q483z00 | Newborn feeding problem NOS                                 |
| 41 | 53402  | Q483z12 | Breast feeding problem in the newborn                       |
| 42 | 110294 | QyuA100 | [X]Other feeding problems of newborn                        |
| 43 | 73036  | 6337    | Triples -2 live+ 1 still born                               |
| 44 |        |         |                                                             |
| 45 | 59694  | Q411000 | Intraventric (nontraumatic) haemorrhage grade 1 fet newborn |
| 46 | 20005  | Q480.00 | Convulsions in newborn                                      |
| 47 | 26682  | Q404.00 | Omphalitis of the newborn                                   |
| 48 |        |         |                                                             |
| 49 | 37044  | Q450.11 | Vitamin K deficiency of the newborn                         |
| 50 | 25091  | Z23AP00 | Premature uterine contraction                               |
| 51 | 102737 | L112300 | Premature separation of placenta with coagulation defect    |
| 52 | 53829  | L281z00 | Premature rupture of membranes NOS                          |
| 53 |        |         |                                                             |
| 54 | 424    | L281.00 | Premature rupture of membranes                              |
| 55 | 108033 | Lyu3D00 | [X]Other premature separation of placenta                   |
| 56 | 69713  | L281000 | Premature rupture of membranes unspecified                  |
| 57 |        |         |                                                             |
| 58 | 59452  | L264000 | Intrauterine death unspecified                              |
| 59 | 4697   | Q10z.11 | Intrauterine growth retardation                             |
| 60 | 1413   | L264.00 | Intrauterine death                                          |

|    |        |         |                                                              |
|----|--------|---------|--------------------------------------------------------------|
| 1  |        |         |                                                              |
| 2  |        |         |                                                              |
| 3  | 89588  | 7E0A600 | Intrauterine insemination without superovulation donor sperm |
| 4  | 37831  | L264z00 | Intrauterine death NOS                                       |
| 5  | 111544 | 7E0A500 | Intrauterine insemination without superovulat partner sperm  |
| 6  | 48471  | PF6D200 | Intrauterine amputation of lower limb                        |
| 7  |        |         |                                                              |
| 8  | 91652  | 7E0A300 | Intrauterine insemination superovulation partner sperm       |
| 9  | 88271  | 7E0A400 | Intrauterine insemination superovulation using donor sperm   |
| 10 |        |         |                                                              |
| 11 | 36694  | Q21..11 | Intrauterine hypoxia                                         |
| 12 | 9542   | L265311 | Maternal care for intrauterine growth retardation            |
| 13 |        |         |                                                              |
| 14 | 57522  | Q451y11 | Neonatal thrombocytopenia due to platelet alloimmunisation   |
| 15 | 44062  | A984000 | Neonatal gonococcal conjunctivits                            |
| 16 | 41151  | Q406611 | Neonatal viral dacryocystitis or conjunctivitis              |
| 17 |        |         |                                                              |
| 18 | 45852  | Q406613 | Neonatal conjunctivitis due to virus                         |
| 19 | 18439  | 44qW.00 | Neonatal screening test                                      |
| 20 | 63783  | Q407y00 | Other specified neonatal candida infection                   |
| 21 | 71752  | Q457000 | Neonatal isoimmune neutropenia                               |
| 22 |        |         |                                                              |
| 23 | 30795  | Q492.00 | Neonatal hypertension                                        |
| 24 | 109861 | Q444100 | Other neonatal hypocalcaemia                                 |
| 25 | 53387  | 14I6.00 | H/O: neonatal abstinence syndrome                            |
| 26 |        |         |                                                              |
| 27 | 13297  | Q447.00 | Neonatal hypoglycaemia                                       |
| 28 | 110197 | Q44y.00 | Other transitory neonatal endocrine and metabolic problem    |
| 29 | 95112  | Q407511 | Neonatal monilial septicaemia                                |
| 30 | 31315  | Q41..11 | Neonatal haemorrhage                                         |
| 31 |        |         |                                                              |
| 32 | 11629  | 2FX..00 | O/E - Umbilical stump - neonatal                             |
| 33 | 99830  | Q446y00 | Other specified transitory neonatal electrolyte disturbance  |
| 34 | 52572  | Q406300 | Neonatal dacryocystitis or conjunctivitis due to E.Coli      |
| 35 |        |         |                                                              |
| 36 | 67105  | Q446300 | Transitory neonatal hyperkalaemia                            |
| 37 | 73994  | Q406400 | Neonatal dacryocystitis/conjunctivitis due to staphylococcus |
| 38 | 32722  | 9kJ..00 | Neonatal check - enhanced services administration            |
| 39 | 18991  | 313K.00 | Neonatal hearing test                                        |
| 40 |        |         |                                                              |
| 41 | 100646 | 67AD.00 | Neonatal feeding education                                   |
| 42 | 37782  | F251100 | Neonatal myoclonic epilepsy                                  |
| 43 | 70045  | Q45y.00 | Other specified transient neonatal blood disorder            |
| 44 |        |         |                                                              |
| 45 | 13302  | Q407.12 | Neonatal thrush                                              |
| 46 | 40123  | Q407.11 | Neonatal monilia                                             |
| 47 | 72350  | Q451y00 | Other specified transient neonatal thrombocytopenia          |
| 48 | 97518  | Q451z00 | Transient neonatal thrombocytopenia NOS                      |
| 49 |        |         |                                                              |
| 50 | 48202  | Q48A.00 | Neonatal cerebral leukomalacia                               |
| 51 | 29743  | Q407000 | Neonatal candidiasis of mouth                                |
| 52 | 29715  | Q406.00 | Neonatal dacryocystitis and conjunctivitis                   |
| 53 |        |         |                                                              |
| 54 | 55492  | Q447000 | Iatrogenic neonatal hypoglycaemia                            |
| 55 | 69813  | Q407z00 | Neonatal candida infection NOS                               |
| 56 | 8069   | Q433A00 | Neonatal jaundice from breast milk inhibitor                 |
| 57 | 3211   | Q433200 | Breast feeding inhibitors causing neonatal jaundice          |
| 58 | 7818   | Q31y500 | Neonatal snuffles                                            |
| 59 |        |         |                                                              |
| 60 | 26686  | Q485200 | Neonatal Abstinence Syndrome                                 |

|    |        |         |                                                             |
|----|--------|---------|-------------------------------------------------------------|
| 1  |        |         |                                                             |
| 2  |        |         |                                                             |
| 3  |        |         |                                                             |
| 4  | 17940  | F4F5400 | Neonatal nasolacrimal duct obstruction                      |
| 5  | 64472  | Q44V.00 | Neonatal goitre, not elsewhere classified                   |
| 6  | 32327  | Q406712 | Neonatal conjunctivitis due to chlamydiae                   |
| 7  | 94578  | Q457z00 | Transient neonatal neutropenia NOS                          |
| 8  | 46817  | Q446200 | Transitory neonatal hyponatraemia                           |
| 9  | 93307  | Q41y400 | Neonatal rectal haemorrhage                                 |
| 10 | 72370  | J004400 | Neonatal enamel hypoplasia                                  |
| 11 | 93210  | Q446z00 | Transitory neonatal electrolyte disturbance NOS             |
| 12 | 36127  | Q406412 | Neonatal conjunctivitis due to staphylococcus               |
| 13 | 26678  | Q406411 | Neonatal dacryocystitis due to staphylococcus               |
| 14 | 21472  | Q441.00 | Neonatal diabetes mellitus                                  |
| 15 | 48010  | Q443.00 | Neonatal thyrotoxicosis                                     |
| 16 | 39055  | 9kJ0.00 | Neonatal check - enhanced service completed                 |
| 17 | 15487  | Q407100 | Neonatal candidiasis of perineum                            |
| 18 | 28292  | Q405.00 | Neonatal infective mastitis                                 |
| 19 | 16482  | Q407.00 | Neonatal candida infection                                  |
| 20 | 2240   | Q4z..12 | Neonatal death                                              |
| 21 | 109658 | Qyu5300 | [X]Other neonatal gastrointestinal haemorrhage              |
| 22 | 53603  | Q48C.00 | Neonatal hypotension                                        |
| 23 | 17496  | Q31y511 | Neonatal sniffles                                           |
| 24 | 48638  | Q433800 | Neonatal jaundice with porphyria                            |
| 25 | 28341  | Q48y600 | Early neonatal death                                        |
| 26 | 44358  | Q44y000 | Transitory neonatal tyrosinaemia                            |
| 27 | 63759  | Q406y00 | Other specified neonatal dacryocystitis or conjunctivitis   |
| 28 | 23422  | Q406100 | Neonatal conjunctivitis                                     |
| 29 | 51913  | Q41y300 | Neonatal melaena                                            |
| 30 | 38485  | 7L13000 | Neonatal exchange blood transfusion                         |
| 31 | 35727  | Q407200 | Neonatal candidiasis of other skin                          |
| 32 | 49769  | ZV29000 | [V]Normal level of neonatal care                            |
| 33 | 45303  | Q433000 | Delayed conjugation causing neonatal jaundice, unspecified  |
| 34 | 55360  | Q433z00 | Delayed conjugation causing neonatal jaundice NOS           |
| 35 | 30742  | F13z500 | Benign neonatal sleep myoclonus                             |
| 36 | 21164  | Q48y411 | Neonatal 'craniotabes'                                      |
| 37 | 56614  | Q488.00 | Neonatal cerebral ischaemia                                 |
| 38 | 104194 | 2L...00 | Neonatal examination                                        |
| 39 | 38163  | Q46y100 | Neonatal diarrhoea                                          |
| 40 | 45444  | Q457.00 | Transient neonatal neutropenia                              |
| 41 | 36564  | Q48y700 | Late neonatal death                                         |
| 42 | 45012  | Q44U.00 | Transitory neonatal endocrine disorder, unspecified         |
| 43 | 49516  | Q414300 | Neonatal vaginal haemorrhage                                |
| 44 | 27845  | Q446000 | Neonatal dehydration                                        |
| 45 | 93156  | Q433y11 | Neonatal jaundice - deficiency enzyme for bilirubin conjug. |
| 46 | 65686  | Q444.12 | Neonatal hypoparathyroidism                                 |
| 47 | 72347  | Q406800 | Neonatal dacryocystitis/conjunctivitis-other inclusion body |
| 48 | 72494  | Q406812 | Neonatal conjunctivitis due to other inclusion body         |
| 49 |        |         |                                                             |
| 50 |        |         |                                                             |
| 51 |        |         |                                                             |
| 52 |        |         |                                                             |
| 53 |        |         |                                                             |
| 54 |        |         |                                                             |
| 55 |        |         |                                                             |
| 56 |        |         |                                                             |
| 57 |        |         |                                                             |
| 58 |        |         |                                                             |
| 59 |        |         |                                                             |
| 60 |        |         |                                                             |

|    |        |         |                                                              |
|----|--------|---------|--------------------------------------------------------------|
| 1  |        |         |                                                              |
| 2  |        |         |                                                              |
| 3  |        |         |                                                              |
| 4  | 43576  | Q406811 | Neonatal dacryocystitis due to other inclusion body          |
| 5  | 27962  | Q311400 | Neonatal aspiration of milk and regurgitated food            |
| 6  | 24792  | Q31y611 | Neonatal apnoeic attack                                      |
| 7  | 106500 | Q44A.00 | Neonatal hypoparathyroidism                                  |
| 8  | 27793  | Q406700 | Neonatal dacryocystitis or conjunctivitis due to chlamydiae  |
| 9  | 35507  | Q433.00 | Other neonatal jaundice - delayed conjugation other cause    |
| 10 | 58833  | Q433700 | Neonatal jaundice with congenital hypothyroidism             |
| 11 | 47909  | Q449.00 | Neonatal tetany without calcium or magnesium deficiency      |
| 12 | 71056  | Q433y00 | Delayed conjugation causing neonatal jaundice OS             |
| 13 | 37776  | Q446100 | Transitory neonatal hypernatraemia                           |
| 14 | 91557  | Q406z00 | Neonatal dacryocystitis or conjunctivitis NOS                |
| 15 | 23566  | Q490.00 | Neonatal cardiac failure                                     |
| 16 | 35477  | Qyu5A00 | [X]Neonatal jaundice from other+unspcf hepatocellular damage |
| 17 | 28361  | Q436100 | Transient neonatal hyperbilirubinaemia                       |
| 18 | 48869  | Qyu5900 | [X]Neonatal jaundice due/other specifd excessive haemolysis  |
| 19 | 64999  | Q406200 | Neonatal dacryocystitis                                      |
| 20 | 55634  | Q442.00 | Neonatal myasthenia gravis                                   |
| 21 | 18578  | Q47y200 | Neonatal skin infection                                      |
| 22 | 20894  | Q444.00 | Neonatal hypocalcaemia                                       |
| 23 | 37953  | Q444z00 | Neonatal hypocalcaemia NOS                                   |
| 24 | 55689  | Q407500 | Neonatal candida septicaemia                                 |
| 25 | 104225 | Q434100 | Giant cell hepatitis causing neonatal jaundice               |
| 26 | 39574  | Q406512 | Neonatal conjunctivitis due to other bacteria                |
| 27 | 37045  | Q406511 | Neonatal dacryocystitis due to other bacteria                |
| 28 | 68264  | Q406600 | Neonatal dacryocystitis or conjunctivitis due to virus       |
| 29 | 54971  | Q446.00 | Other transitory neonatal electrolyte disturbance            |
| 30 | 66985  | Q433600 | Neonatal jaundice with Gilbert's syndrome                    |
| 31 | 39164  | Q430000 | Neonatal jaundice + glucose-6-phosphate dehydrogenase defic. |
| 32 | 99435  | N000500 | Neonatal lupus erythematosus                                 |
| 33 | 6097   | Q40y100 | Neonatal urinary tract infection                             |
| 34 | 40869  | Qyu5B00 | [X]Neonatal jaundice from other specified causes             |
| 35 | 57203  | Q445.00 | Neonatal hypomagnesaemia                                     |
| 36 | 106854 | Q451100 | Trans neonatal thrombocyto due to idopath matern thrombocyto |
| 37 | 54169  | Q491.00 | Neonatal cardiac dysrhythmia                                 |
| 38 | 105058 | Qyu3300 | [X]Other neonatal aspiration syndromes                       |
| 39 | 109912 | Qyu6200 | [X]Other neonatal hypocalcaemia                              |
| 40 | 49462  | Q41y200 | Neonatal haematemesis                                        |
| 41 | 110458 | Q32..00 | Neonatal respiratory distress syndrome                       |
| 42 | 13301  | Q478.00 | Neonatal erythema toxicum                                    |
| 43 | 94612  | Q433500 | Neonatal jaundice with Dubin-Johnson syndrome                |
| 44 | 7475   | ZV29212 | [V]Neonatal care on NNU                                      |
| 45 | 47540  | ZV29211 | [V]Neonatal care on ITU                                      |
| 46 | 68708  | Q406311 | Neonatal dacryocystitis due to E.Coli                        |
| 47 | 89700  | Q406312 | Neonatal conjunctivitis due to E.coli                        |
| 48 | 71441  | Q451.00 | Transient neonatal thrombocytopenia                          |
| 49 |        |         |                                                              |
| 50 |        |         |                                                              |
| 51 |        |         |                                                              |
| 52 |        |         |                                                              |
| 53 |        |         |                                                              |
| 54 |        |         |                                                              |
| 55 |        |         |                                                              |
| 56 |        |         |                                                              |
| 57 |        |         |                                                              |
| 58 |        |         |                                                              |
| 59 |        |         |                                                              |
| 60 |        |         |                                                              |

|    |        |         |                                                              |
|----|--------|---------|--------------------------------------------------------------|
| 1  |        |         |                                                              |
| 2  |        |         |                                                              |
| 3  |        |         |                                                              |
| 4  | 63790  | Q46y000 | Neonatal peritonitis NOS                                     |
| 5  | 72975  | Qyu6000 | [X]Other neonatal hypoglycaemia                              |
| 6  | 96590  | 67AD.11 | Neonatal feeding advice                                      |
| 7  | 90526  | Q444011 | Neonatal cows' milk hypocalcaemia                            |
| 8  | 71986  | Q446400 | Transitory neonatal hypokalaemia                             |
| 9  | 71532  | Q406500 | Neonatal dacryocystitis/conjunctivitis due to other bacteria |
| 10 | 6883   | Q317000 | Perinatal bronchopulmonary dysplasia                         |
| 11 | 94812  | Qyu3A00 | [X]Oth cardiovascular disorders originating/perinatal period |
| 12 | 54248  | Q415.00 | Perinatal adrenal haemorrhage                                |
| 13 | 21461  | Q4...00 | Other perinatal conditions                                   |
| 14 | 45002  | Q412.00 | Perinatal subarachnoid haemorrhage                           |
| 15 | 87844  | 7F2A000 | Obstetric umbilical artery Doppler                           |
| 16 | 41899  | L240000 | Congenital abnormality of uterus affecting obstetric care    |
| 17 | 25731  | Z27..00 | Obstetric investigative observation                          |
| 18 | 101334 | 8HQ2000 | Referral for obstetric ultrasound scan                       |
| 19 | 32913  | Z28..00 | Obstetric pelvic observation                                 |
| 20 | 34677  | 7F23000 | Immed repair obstetric laceration of uterus or cervix uteri  |
| 21 | 58517  | L244012 | Rectocele affecting obstetric care                           |
| 22 | 29087  | 7F25z00 | Obstetric monitoring NOS                                     |
| 23 | 35601  | 7F23z00 | Immediate repair of obstetric laceration NOS                 |
| 24 | 13700  | ZL5D100 | Referral to obstetrician                                     |
| 25 | 13317  | Z7...00 | Obstetric examination                                        |
| 26 | 110628 | L43y.11 | Fat embolism - obstetric                                     |
| 27 | 34046  | 7F2..00 | Other obstetric operations                                   |
| 28 | 60507  | L35z000 | Obstetric trauma NOS, unspecified                            |
| 29 | 56727  | 5392    | Obstetric X-ray - placenta                                   |
| 30 | 59623  | L35..00 | Other obstetric trauma                                       |
| 31 | 52679  | L417.00 | Obstetric cerebral venous thrombosis                         |
| 32 | 13039  | L383.00 | Obstetric toxic reaction to local anaesthesia                |
| 33 | 20907  | L244011 | Cystocele affecting obstetric care                           |
| 34 | 72298  | L355.00 | Other obstetric pelvic organ damage                          |
| 35 | 102027 | L35yz00 | Other obstetric trauma NOS                                   |
| 36 | 34210  | L240011 | Bicornuate uterus affecting obstetric care                   |
| 37 | 85951  | 7F28z00 | Other non routine obstetric scan NOS                         |
| 38 | 34086  | 7Fz..00 | Obstetric operations NOS                                     |
| 39 | 67257  | L35y.00 | Other obstetric trauma OS                                    |
| 40 | 39036  | 7F...00 | Obstetric operations                                         |
| 41 | 11268  | 7F23.12 | Immediate suture of obstetric laceration                     |
| 42 | 59059  | L433.12 | Septic obstetric embolism                                    |
| 43 | 14970  | 7F23100 | Immed repair obstetric laceration perineum & anal sphincter  |
| 44 | 68557  | L353000 | Obstetric laceration of cervix unspecified                   |
| 45 | 73797  | L353z00 | Obstetric laceration of cervix NOS                           |
| 46 | 101752 | L391000 | Obstetric shock unspecified                                  |
| 47 | 85244  | 7F2B.00 | Obstetric ultrasound monitoring                              |
| 48 | 95698  | 7F28y00 | Other specified other non routine obstetric scan             |
| 49 |        |         |                                                              |
| 50 |        |         |                                                              |
| 51 |        |         |                                                              |
| 52 |        |         |                                                              |
| 53 |        |         |                                                              |
| 54 |        |         |                                                              |
| 55 |        |         |                                                              |
| 56 |        |         |                                                              |
| 57 |        |         |                                                              |
| 58 |        |         |                                                              |
| 59 |        |         |                                                              |
| 60 |        |         |                                                              |

|    |        |         |                                                              |
|----|--------|---------|--------------------------------------------------------------|
| 1  |        |         |                                                              |
| 2  |        |         |                                                              |
| 3  | 54473  | L244000 | Other uterine/pelvic floor abnormal affecting obstetric care |
| 4  | 85245  | 7F26z00 | Routine obstetric scan NOS                                   |
| 5  | 55573  | 8HJ7.00 | Obstetric self-referral                                      |
| 6  | 88229  | 7F2A.00 | Obstetric Doppler studies                                    |
| 7  | 78449  | 7F28.00 | Other non routine obstetric scan                             |
| 8  | 68966  | Lyu7.00 | [X]Other obstetric conditions, not elsewhere classified      |
| 9  | 105817 | 9381    | Obstetric coop card issued                                   |
| 10 | 93136  | L241000 | Tumour of uterine body affecting obstetric care              |
| 11 | 86011  | 7F26.00 | Routine obstetric scan                                       |
| 12 | 35558  | 584..12 | U-S scan - obstetric, diagn.                                 |
| 13 | 55750  | L353.00 | Obstetric laceration of cervix                               |
| 14 | 65231  | 9384    | Obstetric coop card updated                                  |
| 15 | 106154 | 7F2Ay00 | Other specified obstetric Doppler studies                    |
| 16 | 109880 | 7F2Az11 | Obstetric doppler ultrasound NOS                             |
| 17 | 48200  | 8HMN.00 | Listed for Obstetric admission                               |
| 18 | 51929  | L354.11 | High vaginal laceration - obstetric                          |
| 19 | 34843  | L352.11 | Inversion of uterus - obstetric                              |
| 20 | 44286  | ZL1C200 | Under care of obstetrician                                   |
| 21 | 4797   | 5842    | U-S obstetric scan normal                                    |
| 22 | 49661  | 7Fy..00 | Other specified obstetric operations                         |
| 23 | 47156  | L357.00 | Obstetric trauma causing pelvic haematoma                    |
| 24 | 26698  | 27Z..00 | Obstetric examination NOS                                    |
| 25 | 104979 | L354z00 | Obstetric high vaginal laceration NOS                        |
| 26 | 94444  | L352z00 | Obstetric inversion of uterus NOS                            |
| 27 | 2382   | 584Z.00 | U-S obstetric diagn. scan NOS                                |
| 28 | 71742  | L354000 | Obstetric high vaginal laceration unspecified                |
| 29 | 20826  | L241011 | Uterine fibroid affecting obstetric care                     |
| 30 | 13318  | 271..11 | O/E - fundus size - obstetric                                |
| 31 | 94059  | 7F2Az00 | Obstetric Doppler studies NOS                                |
| 32 | 28730  | L355.11 | Bladder injury - obstetric                                   |
| 33 | 27916  | L353.12 | Tear of cervix - obstetric                                   |
| 34 | 86021  | 7F24.00 | Other obstetric operations                                   |
| 35 | 22929  | 8H3C.00 | Non-urgent obstetric admission                               |
| 36 | 105146 | 7F2Ay11 | Other specified obstetric doppler ultrasound                 |
| 37 | 69458  | L354.00 | Obstetric high vaginal laceration                            |
| 38 | 33352  | L352.00 | Obstetric inversion of uterus                                |
| 39 | 23800  | 7F23.11 | Immediate repair of obstetric tear                           |
| 40 | 29685  | 5843    | U-S obstetric scan abnormal                                  |
| 41 | 70607  | 7F23300 | Immediate repair of minor obstetric laceration               |
| 42 | 24655  | 8H27.00 | Admit obstetric emergency                                    |
| 43 | 106067 | L246000 | Other cervical abnormality affecting obstetric care          |
| 44 | 53094  | 7F25y00 | Other specified obstetric monitoring                         |
| 45 | 98057  | L248000 | Vulval abnormality affecting obstetric care                  |
| 46 | 36959  | L391.00 | Obstetric shock                                              |
| 47 | 17911  | L416.11 | Piles - obstetric                                            |
| 48 |        |         |                                                              |
| 49 |        |         |                                                              |
| 50 |        |         |                                                              |
| 51 |        |         |                                                              |
| 52 |        |         |                                                              |
| 53 |        |         |                                                              |
| 54 |        |         |                                                              |
| 55 |        |         |                                                              |
| 56 |        |         |                                                              |
| 57 |        |         |                                                              |
| 58 |        |         |                                                              |
| 59 |        |         |                                                              |
| 60 |        |         |                                                              |

|    |        |         |                                                            |
|----|--------|---------|------------------------------------------------------------|
| 1  |        |         |                                                            |
| 2  |        |         |                                                            |
| 3  | 19800  | 584..00 | Ultrasound in obstetric diagn.                             |
| 4  | 62012  | 7F2z.00 | Other obstetric operations NOS                             |
| 5  | 60870  | 938Z.00 | Obstetric coop card NOS                                    |
| 6  | 20591  | 539..00 | Abdominal obstetric X-ray                                  |
| 7  | 23169  | 539Z.00 | Abdominal obstetric X-ray NOS                              |
| 8  | 98639  | L43zz00 | Obstetric pulmonary embolism NOS                           |
| 9  | 101944 | L43z000 | Obstetric pulmonary embolism NOS, unspecified              |
| 10 | 34533  | 8HV6.00 | Private referral to obstetrician                           |
| 11 | 35197  | 8HLN.00 | Obstetric D.V. done                                        |
| 12 | 104205 | 7F2A100 | Obstetric uterine artery Doppler                           |
| 13 | 102802 | 7F2By00 | Other specified obstetric ultrasound monitoring            |
| 14 | 12625  | 7F25.00 | Obstetric monitoring                                       |
| 15 | 57891  | 7F23.00 | Immediate repair of obstetric laceration                   |
| 16 | 54582  | L35zz00 | Obstetric trauma NOS                                       |
| 17 | 13965  | 584..13 | Ultra-sound scan - obstetric                               |
| 18 | 96343  | 7F26y00 | Other specified routine obstetric scan                     |
| 19 | 100451 | 7F24100 | Obstetric uterine tamponade                                |
| 20 | 27019  | 5841    | U-S obstetric scan requested                               |
| 21 | 87848  | 7F2Bz00 | Obstetric ultrasound monitoring NOS                        |
| 22 | 91278  | L357000 | Obstetric pelvic haematoma unspecified                     |
| 23 | 36340  | 938..00 | Obstetric coop card                                        |
| 24 | 19327  | L411.11 | Perineal obstetric varicose veins                          |
| 25 | 20496  | L411.12 | Vulval obstetric varicose veins                            |
| 26 | 27650  | L384.00 | Obstetric spinal and epidural anaesthesia-induced headache |
| 27 | 107037 | Lyu4C00 | [X]Other specified obstetric trauma                        |
| 28 | 43628  | L247011 | Septate vagina affecting obstetric care                    |
| 29 | 11988  | 8H57.00 | Obstetric referral                                         |
| 30 | 11204  | 271..12 | O/E - uterus size - obstetric                              |
| 31 | 48311  | Z261.00 | Observation of gestational sac                             |
| 32 | 43004  | Q13..00 | Light for gestational age                                  |
| 33 | 22385  | Z22C300 | Length of gestation                                        |
| 34 | 91915  | 7M0f400 | From 9 weeks to <14 weeks gestational age                  |
| 35 | 50704  | Q113.00 | Light for gestational age                                  |
| 36 | 69250  | L169000 | Herpes gestationis unspecified                             |
| 37 | 59681  | L41z511 | Gestational phlebitis NOS                                  |
| 38 | 34265  | L16C000 | Gestational proteinuria                                    |
| 39 | 60330  | L19..00 | Complications specific to multiple gestation               |
| 40 | 34505  | 62X3.00 | Full term gestation - 40 weeks                             |
| 41 | 90884  | 7M0f200 | 9 - 13 weeks gestational age                               |
| 42 | 29565  | L161.13 | Gestational oedema                                         |
| 43 | 102435 | 8CE0000 | Gestational diabetes information leaflet given             |
| 44 | 34484  | 62X1.00 | Gestation = 24 weeks                                       |
| 45 | 49663  | Z261100 | Gestational sac present                                    |
| 46 | 7515   | L169.00 | Herpes gestationis                                         |
| 47 | 37201  | L16C100 | Gestational oedema with proteinuria                        |
| 48 |        |         |                                                            |
| 49 |        |         |                                                            |
| 50 |        |         |                                                            |
| 51 |        |         |                                                            |
| 52 |        |         |                                                            |
| 53 |        |         |                                                            |
| 54 |        |         |                                                            |
| 55 |        |         |                                                            |
| 56 |        |         |                                                            |
| 57 |        |         |                                                            |
| 58 |        |         |                                                            |
| 59 |        |         |                                                            |
| 60 |        |         |                                                            |



|        |         |                                              |
|--------|---------|----------------------------------------------|
| 50081  | L41z512 | Gestational phlebopathy NOS                  |
| 58971  | L41z513 | Gestational thrombosis NOS                   |
| 16975  | L21..11 | Gestation - multiple                         |
| 97682  | 7M0fy00 | Other specified gestational age              |
| 95702  | 7M0f300 | Under 9 weeks gestational age                |
| 108013 | ZC2CB00 | Dietary advice for gestational diabetes      |
| 26556  | 62X2.00 | Gestation >24 weeks                          |
| 26555  | 62X0.00 | Gestation <24 weeks                          |
| 111075 | Qyu1200 | [X]Other 'heavy for gestational age' infants |
| 86327  | 7M0f000 | Over 20 weeks gestational age                |
| 91101  | 7M0fz00 | Gestational age NOS                          |
| 103954 | 62X5.00 | Length of gestation at time of test          |
| 2664   | L180900 | Gestational diabetes mellitus                |
| 95703  | 7M0f100 | 14 - 20 weeks gestational age                |
| 8446   | L180811 | Gestational diabetes mellitus                |
| 40703  | L169z00 | Herpes gestationis NOS                       |
| 43805  | Z22C312 | Duration of gestation                        |
| 18810  | 62X..00 | Length of gestation                          |
| 103090 | Lyu3000 | [X]Other multiple gestation                  |
| 55352  | 7M0f.00 | Gestational age                              |
| 21526  | L123500 | Gestational hypertension                     |

| colour | condition             | time frame          |
|--------|-----------------------|---------------------|
| green  | pregnancy             | 7/12 mths           |
| blue   | birth                 | <21 days postpartum |
| yellow | abortion/ miscarriage | <5 days             |

#### Appendix 4: Additional CPRD browser pregnancy medcodes

| Medcode | Readcode | Readterm                                                     |
|---------|----------|--------------------------------------------------------------|
| 6298    | ZV28.00  | [V]Antenatal screening                                       |
| 94405   | L413100  | Antenatal deep vein thrombosis - delivered                   |
| 99188   | L173.00  | Maternal tuberculosis in pregnancy/childbirth/puerperium     |
| 63781   | L410z00  | Varicose veins of legs in pregnancy and puerperium NOS       |
| 45870   | Ly...00  | Complications of pregnancy,childbirth or the puerperium OS   |
| 52106   | L412z00  | Superficial thrombophlebitis in pregnancy and puerperium NOS |
| 86991   | L172000  | Other maternal venereal disease, unspec pregnancy/puerperium |
| 4243    | L466.00  | Galactorrhoea in pregnancy and the puerperium                |
| 70092   | L460.00  | Retracted nipple in pregnancy, the puerperium or lactation   |

|        |         |                                                              |
|--------|---------|--------------------------------------------------------------|
| 16995  | L462.00 | Breast engorgement in pregnancy, the puerperium or lactation |
| 59573  | L176500 | Viral hepatitis comp pregnancy, childbirth & the puerperium  |
| 88361  | L248.11 | Persistent hymen in pregnancy, childbirth and the puerperium |
| 31610  | L248.13 | Vulval abnormality in pregnancy/childbirth/puerperium        |
| 92998  | Lyu1.00 | [X]Oedema,proteinuria+hypertens in pregnancy,childbrth,puerp |
| 20597  | 12G4.00 | FH: Multiple pregnancy                                       |
| 28446  | Lz...00 | Complications of pregnancy,childbirth and the puerperium NOS |
| 63835  | L247z11 | Septate vagina in pregnancy/childbirth/puerperium NOS        |
| 109550 | L416400 | Haemorrhoids in pregnancy and puerperium with p/n comp       |
| 59276  | L032.00 | Ovarian pregnancy                                            |
| 65579  | L415.00 | Other phlebitis and thrombosis in pregnancy and puerperium   |
| 93143  | L121.00 | Renal hypertension in pregnancy/childbirth/puerperium        |
| 60154  | L24..00 | Pelvic soft tissue abnormality in pregnancy/childbirth/puerp |
| 71717  | L121100 | Renal hypertension in pregnancy/childbirth/puerp - delivered |
| 24006  | L466100 | Galactorrhoea in pregnancy and the puerperium - delivered    |
| 44069  | L18..00 | Other medical condition in pregnancy/childbirth/puerperium   |
| 47918  | L090300 | Salpingitis following abortive pregnancy                     |
| 11152  | L...00  | Complications of pregnancy, childbirth and the puerperium    |
| 63644  | L181z00 | Thyroid dysfunction in pregnancy/childbirth/puerperium NOS   |
| 96004  | L183z00 | Drug dependence during pregnancy/childbirth/puerperium NOS   |
| 1771   | L182.00 | Anaemia during pregnancy, childbirth and the puerperium      |
| 46744  | L41..00 | Venous complications of pregnancy and the puerperium         |
| 90329  | L416z00 | Haemorrhoids in pregnancy and the puerperium NOS             |
| 41050  | Z2...00 | Pregnancy, childbirth and puerperium observations            |
| 39550  | L244z11 | Cystocele in pregnancy, childbirth or the puerperium NOS     |
| 64147  | L244z12 | Rectocele in pregnancy, childbirth or the puerperium NOS     |
| 15297  | L461400 | Cracked nipple in pregnancy/puerperium/lactation + p/n comp  |
| 73717  | L463300 | Other breast disorder in pregnancy/puerperium/lact +a/n comp |
| 98264  | L165200 | Asymptomatic bacteriuria in pregnancy - del with p/n comp    |
| 53310  | L1z..00 | Complications of pregnancy/childbirth/puerperium NOS         |
| 103144 | L416300 | Haemorrhoids in pregnancy and puerperium with a/n comp       |
| 46756  | L184.00 | Mental disorders in pregnancy, childbirth and the puerperium |
| 26023  | L411300 | VV's of perineum/vulva in pregnancy/puerperium + a/n comp    |
| 58140  | L173000 | Maternal tuberculosis,unspec whether in pregnancy/puerperium |
| 73089  | L460000 | Retracted nipple in pregnancy/puerperium/lactation unspec    |
| 67006  | L096400 | Pulmonary embolism following abortive pregnancy              |
| 65085  | L092000 | Bladder damage following abortive pregnancy                  |
| 23840  | L090z00 | Septicaemia NOS following abortive pregnancy                 |
| 51359  | L090200 | Pelvic peritonitis following abortive pregnancy              |
| 106097 | L09y.00 | Other specified complication following abortive pregnancy    |
| 12604  | L120.00 | Benign essential hypertension in pregnancy/childbirth/puerp  |

|    |        |         |                                                              |
|----|--------|---------|--------------------------------------------------------------|
| 1  |        |         |                                                              |
| 2  |        |         |                                                              |
| 3  |        |         |                                                              |
| 4  | 103683 | 8Hki.00 | Referral to teenage pregnancy and parenting support service  |
| 5  | 42091  | L411z00 | Varicose veins of perineum/vulva in pregnancy/puerperium NOS |
| 6  | 96437  | L170000 | Maternal syphilis, unspec whether in pregnancy or puerperium |
| 7  | 20850  | L244.11 | Cystocele in pregnancy, childbirth and the puerperium        |
| 8  | 35903  | L244.12 | Pendulous abdomen in pregnancy,childbirth and the puerperium |
| 9  | 39492  | L244.13 | Rectocele in pregnancy, childbirth and the puerperium        |
| 10 | 71943  | L411000 | VV's of perineum/vulva in pregnancy/puerperium unspecified   |
| 11 | 93583  | L096.00 | Embolism following abortive pregnancy                        |
| 12 | 34182  | 1547    | H/O: medical termination of pregnancy                        |
| 13 | 70422  | L093400 | Uraemia following abortive pregnancy                         |
| 14 | 103222 | L248z11 | Persistent hymen in pregnancy/childbirth/puerperium NOS      |
| 15 | 97296  | L461200 | Cracked nipple in pregnancy/puerp/lact - deliv + p/n comp    |
| 16 | 5541   | 1544    | H/O: ectopic pregnancy                                       |
| 17 | 58982  | L186.00 | Other cardiovascular diseases in pregnancy/childbirth/puerp  |
| 18 | 62886  | L461z00 | Cracked nipple in pregnancy, the puerperium or lactation NOS |
| 19 | 41473  | L183.00 | Drug dependence in pregnancy, childbirth and the puerperium  |
| 20 | 48552  | L010.11 | Anembryonic pregnancy                                        |
| 21 | 33634  | L182z00 | Anaemia during pregnancy/childbirth/puerperium NOS           |
| 22 | 64384  | L180z00 | Diabetes mellitus in pregnancy/childbirth/puerperium NOS     |
| 23 | 25759  | L411.00 | VV's of perineum/vulva in pregnancy/puerperium               |
| 24 | 38556  | 67A7.00 | Pregnancy dental advice                                      |
| 25 | 41718  | L1y..00 | Complications of pregnancy/childbirth/puerperium OS          |
| 26 | 53056  | L246.11 | Polyp of cervix in pregnancy, childbirth and the puerperium  |
| 27 | 73557  | L188z00 | Abnormal GTT in pregnancy/childbirth/puerperium NOS          |
| 28 | 69012  | L466300 | Galactorrhoea in pregnancy/puerperium with a/n complication  |
| 29 | 57131  | L462100 | Breast engorgement in pregnancy/puerperium/lactation - deliv |
| 30 | 64260  | L18D.00 | Dis nervous syst complic pregnancy,childbirth and puerperium |
| 31 | 59493  | L090400 | Salpingo-oophoritis following abortive pregnancy             |
| 32 | 104656 | Ly2..00 | Sequelae of complication pregnancy childbirth and puerperium |
| 33 | 16046  | L410.00 | Varicose veins of legs in pregnancy and the puerperium       |
| 34 | 72215  | L241z00 | Uterine body tumour in pregnancy/childbirth/puerperium NOS   |
| 35 | 13245  | 12G2.00 | FH: Diabetes in pregnancy                                    |
| 36 | 106736 | 9mK1.00 | Pertussis vaccination in pregnancy invitation second letter  |
| 37 | 66537  | L170100 | Maternal syphilis during pregnancy - baby delivered          |
| 38 | 92415  | L095.00 | Shock following abortive pregnancy                           |
| 39 | 35273  | L097.00 | Readmission for abortive pregnancy (NHS codes)               |
| 40 | 20152  | L090y00 | Sepsis NOS following abortion/ectopic/molar pregnancy        |
| 41 | 50009  | L461100 | Cracked nipple in pregnancy/puerperium/lactation - delivered |
| 42 | 71162  | L16y100 | Other pregnancy complication - delivered                     |
| 43 | 102635 | 8Cg..00 | Pregnancy termination care                                   |
| 44 | 104806 | L463100 | Other breast disorder in pregnancy/puerperium/lact - deliv   |
| 45 |        |         |                                                              |
| 46 |        |         |                                                              |
| 47 |        |         |                                                              |
| 48 |        |         |                                                              |
| 49 |        |         |                                                              |
| 50 |        |         |                                                              |
| 51 |        |         |                                                              |
| 52 |        |         |                                                              |
| 53 |        |         |                                                              |
| 54 |        |         |                                                              |
| 55 |        |         |                                                              |
| 56 |        |         |                                                              |
| 57 |        |         |                                                              |
| 58 |        |         |                                                              |
| 59 |        |         |                                                              |
| 60 |        |         |                                                              |

|        |         |                                                              |
|--------|---------|--------------------------------------------------------------|
| 63319  | L096.11 | Embolus following abortive pregnancy                         |
| 94527  | L16y400 | Other pregnancy complication with postnatal complication     |
| 9170   | L12..00 | Hypertension complicating pregnancy/childbirth/puerperium    |
| 73432  | L18z100 | Medical condition NOS during pregnancy - baby delivered      |
| 104466 | L179.00 | HIV disease complicating pregnancy childbirth puerperium     |
| 47197  | L410400 | Varicose veins of legs in pregnancy/puerperium + p/n comp    |
| 54761  | L170.00 | Maternal syphilis in pregnancy/childbirth/puerperium         |
| 63773  | L416100 | Haemorrhoids in pregnancy and the puerperium - delivered     |
| 101499 | L246z12 | Stenosis of cervix in pregnancy/childbirth/puerperium NOS    |
| 33255  | L246z11 | Polyp of cervix in pregnancy/childbirth/puerperium NOS       |
| 56542  | L240z11 | Bicornuate uterus in pregnancy, childbirth or puerperium NOS |
| 41016  | L247.11 | Septate vagina in pregnancy, childbirth and the puerperium   |
| 40262  | L247.13 | Vaginal abnormality in pregnancy/childbirth/puerperium       |
| 6478   | L188.00 | Abnormal glucose tolerance test in pregnancy/childb/puerp    |
| 59910  | L17z.00 | Maternal infect/parasitic dis NOS in pregnancy/childb/puerp  |
| 62052  | L092500 | Uterus damage following abortive pregnancy                   |
| 97836  | L242100 | Uterine operation scar in pregnancy/childbirth/puerp - deliv |
| 99889  | L16A200 | Glycosuria during pregnancy - delivered with p/n comp        |
| 98981  | L166400 | Genitourinary tract infection in pregnancy with p/n comp     |
| 59601  | L462200 | Breast engorgement in pregnancy/puerp/lact - del + p/n comp  |
| 16017  | L166100 | Genitourinary tract infection in pregnancy - delivered       |
| 10205  | ZG9..00 | Advice relating to pregnancy and fertility                   |
| 105500 | L41yz00 | Other venous complication of pregnancy and puerperium NOS    |
| 41283  | L187.00 | Orthopaedic disorders in pregnancy/childbirth/puerperium     |
| 63379  | L183100 | Drug dependence during pregnancy - baby delivered            |
| 38871  | L246.00 | Other cervical abnormality in pregnancy/childbirth/puerp     |
| 47686  | L181.00 | Thyroid dysfunction in pregnancy/childbirth/puerperium       |
| 23691  | L172.00 | Other venereal diseases in pregnancy/childbirth/puerperium   |
| 107197 | L170z00 | Maternal syphilis in pregnancy/childbirth/puerperium NOS     |
| 68215  | L188100 | Abnormal GTT during pregnancy - baby delivered               |
| 40723  | L12z.00 | Unspecified hypertension in pregnancy/childbirth/puerperium  |
| 104542 | 67AH.00 | Education about toxoplasmosis precautions during pregnancy   |
| 97741  | L461000 | Cracked nipple in pregnancy/puerperium/lactation unspecified |
| 67035  | L123200 | Transient hypertension of pregnancy - deliv with p/n comp    |
| 64125  | L09yz00 | Other specified complication NOS follow abortive pregnancy   |
| 57640  | L242z00 | Uterine operation scar in pregnancy/childbirth/puerp NOS     |
| 2924   | 7E06600 | Hysterotomy and termination of pregnancy                     |
| 27952  | ZV13900 | [V]PH comp of pregnancy, childbirth and the puerperium       |
| 53141  | L241.00 | Tumour of uterine body in pregnancy/childbirth/puerperium    |
| 35928  | L463000 | Other breast disorder in pregnancy/puerperium/lact unspec    |
| 40121  | 12G1.00 | FH: Raised B.P. in pregnancy                                 |

|    |        |         |                                                              |
|----|--------|---------|--------------------------------------------------------------|
| 1  |        |         |                                                              |
| 2  |        |         |                                                              |
| 3  |        |         |                                                              |
| 4  | 11359  | L180.00 | Diabetes mellitus during pregnancy/childbirth/puerperium     |
| 5  | 33708  | L182100 | Anaemia during pregnancy - baby delivered                    |
| 6  | 58686  | L462000 | Breast engorgement in pregnancy/puerperium/lactation unspec  |
| 7  | 6560   | L416.00 | Haemorrhoids in pregnancy and the puerperium                 |
| 8  | 98133  | 9Ea0.00 | Risk life pregnant woman greater than if pregnancy terminatd |
| 9  | 32950  | L03y100 | Cornual pregnancy                                            |
| 10 | 105006 | Q48G.00 | Complication termination pregnancy affecting fetus newborn   |
| 11 | 107708 | L415100 | Other phlebitis/thrombosis in pregnancy/puerperium - deliv   |
| 12 | 28225  | L240.11 | Bicornuate uterus in pregnancy, childbirth and puerperium    |
| 13 | 49789  | L240.12 | Double uterus in pregnancy, childbirth and the puerperium    |
| 14 | 56217  | L416000 | Haemorrhoids in pregnancy and the puerperium unspecified     |
| 15 | 99154  | L410000 | Varicose veins of legs in pregnancy/puerperium unspecified   |
| 16 | 96724  | L162100 | Unspecified renal disease in pregnancy - delivered           |
| 17 | 101260 | L10z100 | Early pregnancy haemorrhage NOS - delivered                  |
| 18 | 35859  | 67A5.00 | Pregnancy alcohol advice                                     |
| 19 | 42598  | L175.00 | Maternal rubella in pregnancy, childbirth and the puerperium |
| 20 | 72437  | L248z00 | Vulval abnormality in pregnancy/childbirth/puerperium NOS    |
| 21 | 101272 | L462300 | Breast engorgement in pregnancy/puerperium/lact + a/n comp   |
| 22 | 92362  | L240z00 | Congenital abnormality uterus in pregnancy/childb/puerp NOS  |
| 23 | 63362  | L091100 | Defibrination syndrome following abortive pregnancy          |
| 24 | 73311  | L41z.00 | Venous complications of pregnancy and puerperium NOS         |
| 25 | 34639  | L180100 | Diabetes mellitus during pregnancy - baby delivered          |
| 26 | 43754  | L18z.00 | Medical condition NOS in pregnancy/childbirth/puerperium     |
| 27 | 30948  | L150100 | Post-term pregnancy - delivered                              |
| 28 | 73647  | L188000 | Abnormal GTT - unspec whether during pregnancy/puerperium    |
| 29 | 54681  | L189.00 | Dis resp syst comp pregnancy, childbirth & puerperium        |
| 30 | 99365  | L460z00 | Retracted nipple in pregnancy/puerperium/lactation NOS       |
| 31 | 64649  | L175100 | Maternal rubella during pregnancy - baby delivered           |
| 32 | 28611  | L461.00 | Cracked nipple in pregnancy, the puerperium or lactation     |
| 33 | 61144  | L463.00 | Other breast disorder in pregnancy/puerperium/lactation      |
| 34 | 50571  | L090100 | Parametritis following abortive pregnancy                    |
| 35 | 70342  | L123400 | Transient hypertension of pregnancy + postnatal complication |
| 36 | 99422  | L187000 | Orthopaedic disorder - unsp whether in pregnancy/puerperium  |
| 37 | 32007  | L090.00 | Genital or pelvic infection following abortive pregnancy     |
| 38 | 45242  | L241.11 | Uterine fibroids in pregnancy, childbirth and the puerperium |
| 39 | 7270   | 12G4.11 | FH: Twin pregnancy                                           |
| 40 | 38440  | L462z00 | Breast engorgement in pregnancy/puerperium/lactation NOS     |
| 41 | 89557  | L092300 | Cervix damage following abortive pregnancy                   |
| 42 | 41961  | L171.00 | Maternal gonorrhoea during pregnancy/childbirth/puerperium   |
| 43 | 50908  | L242.00 | Uterine scar from previous surgery in pregnancy/childb/puerp |
| 44 | 16752  | ZV72900 | [V]Pregnancy examination and test                            |
| 45 |        |         |                                                              |
| 46 |        |         |                                                              |
| 47 |        |         |                                                              |
| 48 |        |         |                                                              |
| 49 |        |         |                                                              |
| 50 |        |         |                                                              |
| 51 |        |         |                                                              |
| 52 |        |         |                                                              |
| 53 |        |         |                                                              |
| 54 |        |         |                                                              |
| 55 |        |         |                                                              |
| 56 |        |         |                                                              |
| 57 |        |         |                                                              |
| 58 |        |         |                                                              |
| 59 |        |         |                                                              |
| 60 |        |         |                                                              |

|        |         |                                                              |
|--------|---------|--------------------------------------------------------------|
| 14765  | L462400 | Breast engorgement in pregnancy/puerperium/lact + p/n comp   |
| 15633  | L182000 | Anaemia - unspecified whether in pregnancy or the puerperium |
| 73757  | L247z00 | Vaginal abnormality in pregnancy/childbirth/puerperium NOS   |
| 99389  | L460300 | Retracted nipple in pregnancy/puerperium/lact with a/n comp  |
| 24303  | 9Ea..00 | Reason for termination of pregnancy                          |
| 55757  | L16y200 | Other pregnancy complication - delivered with postnatal comp |
| 67635  | L180000 | Diabetes mellitus - unspec whether in pregnancy/puerperium   |
| 51639  | L241z11 | Uterine fibroid in pregnancy/childbirth/puerperium NOS       |
| 40978  | Z22A700 | Surrogate pregnancy                                          |
| 18944  | 7E07011 | Dilation cervix uteri & curettage for termination pregnancy  |
| 54107  | L10z000 | Early pregnancy haemorrhage NOS unspecified                  |
| 103610 | 9NkN.00 | Seen in early pregnancy unit                                 |
| 70476  | L132100 | Late pregnancy vomiting - delivered                          |
| 23456  | L412.00 | Superficial thrombophlebitis in pregnancy and the puerperium |
| 67377  | L463z00 | Other breast disorder in pregnancy/puerperium/lactation NOS  |
| 94736  | L096600 | Septic embolism following abortive pregnancy                 |
| 94353  | L175000 | Maternal rubella, unspecified whether pregnancy/puerperium   |
| 64127  | L121000 | Renal hypertension in pregnancy/childbirth/puerp unspecified |
| 99594  | L415000 | Other phlebitis/thrombosis in pregnancy/puerperium unsp      |
| 50093  | L093000 | Oliguria following abortive pregnancy                        |
| 28312  | L466z00 | Galactorrhoea in pregnancy and the puerperium NOS            |
| 72944  | L176.00 | Other maternal viral dis. in pregnancy/childbirth/puerperium |
| 49390  | L174.00 | Maternal malaria in pregnancy, childbirth and the puerperium |
| 97629  | L246z00 | Other cervical abnormality in pregnancy/childbirth/puerp NOS |
| 57419  | L167100 | Liver disorder in pregnancy - delivered                      |
| 73927  | L175z00 | Maternal rubella in pregnancy/childbirth/puerperium NOS      |
| 54089  | L466000 | Galactorrhoea in pregnancy and the puerperium unspecified    |
| 94718  | L121z00 | Renal hypertension in pregnancy/childbirth/puerperium NOS    |
| 105918 | L09y400 | Urinary tract infection following abortive pregnancy         |
| 30326  | L090000 | Endometritis following abortive pregnancy                    |
| 38022  | Z22CF00 | Date symptom of pregnancy first noted                        |
| 69703  | L185100 | Congenital cardiovasc dis in pregnancy - baby delivered      |
| 69911  | L18zz00 | Medical condition NOS in pregnancy/childb/puerp NOS          |
| 35680  | Q423.00 | Hydrops fetalis due to isoimmunisation                       |
| 59296  | L140000 | Threatened premature labour unspecified                      |
