# Supplementary material for: Trends in HIV testing in the UK primary care setting: a 15-year retrospective cohort study from 2000 to 2015
Source: PubMed Central journal article supplement — BMJ Open. 2019 Nov 24;9(11):e027744. doi: 10.1136/bmjopen-2018-027744 (PMC6887055; doi:10.1136/bmjopen-2018-027744), 2019-11-24
Supplement: bmjopen-2018-027744supp001.pdf [file bmjopen-2018-027744supp001.pdf]

**Trends in HIV testing in the UK Primary Care setting: A 15-year retrospective cohort study from 2000 to 2015**

**Supplementary Material**

**Page 2 Appendix 1: Read & OXMIS codes denoting an HIV test used to identify patients who have ever had a HIV test recorded in primary care (Evans *et al* 2009<sup>25</sup>)**

**Page 3 Appendix 2: Read & OXMIS codes denoting HIV positive status used to identify HIV positive patients who have their HIV positive status recorded in primary care (Evans *et al* 2009<sup>25</sup>).**

**Page 4 Appendix 3: Pregnancy/Delivery/Abortion medcodes (Jackson *et al*<sup>27</sup>)**

**Appendix 1: Read & OXMIS codes denoting an HIV test used to identify patients who have ever had a HIV test recorded in primary care (Evans *et al* 2009<sup>25</sup>)**

| Code    | READ/OXMIS | Code description                                             | Certainty of HIV+ test |
|---------|------------|--------------------------------------------------------------|------------------------|
| 6827.11 | READ       | HIV screening                                                | Definite               |
| 43C..00 | READ       | HTLV-3 antibody test                                         | Definite               |
| 43C..11 | READ       | Aids antibody test                                           | Definite               |
| 43C..12 | READ       | Human immunodeficiency viral test                            | Definite               |
| 43C1.00 | READ       | Blood sent for HTLV-3 serology                               | Definite               |
| 43C2.00 | READ       | HTLV-3 antibody negative                                     | Definite               |
| 43C2.11 | READ       | HIV negative                                                 | Definite               |
| 43CZ.00 | READ       | HTLV-3 antibody NOS                                          | Definite               |
| 43d5.00 | READ       | HIV antibody/antigen (Duo)                                   | Definite               |
| 43d6.00 | READ       | HTLV 1 antibody level                                        | Ambiguous              |
| 43dc.00 | READ       | HTLV 2 antibody level                                        | Ambiguous              |
| 43h2.00 | READ       | HIV 1 PCR                                                    | Definite               |
| 43j7.00 | READ       | HIV 1 nucleic acid detection                                 | Definite               |
| 43V1.00 | READ       | Absolute CD4 count                                           | Definite               |
| 43VE.00 | READ       | CD4/CD8 ratio                                                | Definite               |
| 43VH.00 | READ       | Percentage CD4 count                                         | Definite               |
| 43Vo.00 | READ       | Absolute CD4 (T4 cells) count                                | Definite               |
| 43Vp.00 | READ       | Percentage CD4 (T4 cells) count                              | Definite               |
| 43W7.00 | READ       | HIV1 antibody level                                          | Definite               |
| 43W8.00 | READ       | HIV2 antibody level                                          | Definite               |
| 43WK.00 | READ       | Human immunodeficiency virus antibody level                  | Definite               |
| 4J34.00 | READ       | HIV viral load                                               | Definite               |
| 4J35.00 | READ       | HIV p24 antigen level                                        | Definite               |
| 4JDT.00 | READ       | HIV serology                                                 | Definite               |
| 4JR7.00 | READ       | HIV screening test                                           | Definite               |
| 62b..00 | READ       | Antenatal HIV screening                                      | Definite               |
| 6827.00 | READ       | AIDS (HTLV-III) screening                                    | Definite               |
| R109.00 | READ       | [D]Laboratory evidence of human immunodeficiency virus [HIV] | Definite               |
| ZV01800 | READ       | [V]Human immunodeficiency virus - negative                   | Definite               |
| ZV73700 | READ       | [V]Special screening exam for human immunodeficiency virus   | Definite               |
| L1111PV | OXMIS      | HIV ANTIBODY TEST POSITIVE                                   | Definite               |
| L 153P  | OXMIS      | HTVL-AIDS-III ANTIBODY TEST POSITIVE                         | Definite               |
| L 153   | OXMIS      | HTVL-AIDS-III ANTIBODY TEST                                  | Definite               |
| L1111NE | OXMIS      | HIV ANTIBODY TEST NEGATIVE                                   | Definite               |
| L 153N  | OXMIS      | HTVL-AIDS-III ANTIBODY TEST NEGATIVE                         | Definite               |
| 65VE.00 | READ       | Notification of AIDS                                         | Ambiguous              |
| 43j8.00 | READ       | HTLV 1 nucleic acid detection                                | Ambiguous              |

**Appendix 2: Read & OXMIS codes denoting HIV positive status used to identify HIV positive patients who have their HIV positive status recorded in primary care.( Evans *et al* 2009<sup>25</sup>)**

| Code    | Read/OXMIS | Code description                                              | Certainty of HIV+ status |
|---------|------------|---------------------------------------------------------------|--------------------------|
| 65QA.00 | READ       | AIDS carrier                                                  | Definite                 |
| A789700 | READ       | HIV disease resulting other types of non-Hodgkin's lymphoma   | Definite                 |
| A789800 | READ       | HIV disease resulting in multiple malignant neoplasms         | Definite                 |
| A788.00 | READ       | Acquired immune deficiency syndrome                           | Definite                 |
| A788500 | READ       | Human immunodeficiency virus with secondary infection         | Definite                 |
| A788X00 | READ       | HIV disease resulting/unspsc infectious+parasitic disease     | Definite                 |
| A789200 | READ       | HIV disease resulting in candidiasis                          | Definite                 |
| A789500 | READ       | HIV disease resulting in Kaposi's sarcoma                     | Definite                 |
| AyuC100 | READ       | [X]HIV disease resulting in other viral infections            | Definite                 |
| AyuC700 | READ       | [X]HIV dis reslt/oth mal neopl/lymph,h'matopoetc+reltd tissu  | Definite                 |
| A788000 | READ       | Acute human immunodeficiency virus infection                  | Definite                 |
| A788100 | READ       | Asymptomatic human immunodeficiency virus infection           | Definite                 |
| A789300 | READ       | HIV disease resulting in Pneumocystis carinii pneumonia       | Definite                 |
| A789600 | READ       | HIV disease resulting in Burkitt's lymphoma                   | Definite                 |
| A798.00 | READ       | Retrovirus infection                                          | Definite                 |
| AyuC200 | READ       | [X]HIV disease resulting in other mycoses                     | Definite                 |
| AyuCA00 | READ       | [X]HIV disease resulting in multiple diseases CE              | Definite                 |
| A788U00 | READ       | HIV disease result/haematological+immunologic abnorms,NEC     | Definite                 |
| A789.00 | READ       | Human immunodef virus resulting in other disease              | Definite                 |
| AyuC000 | READ       | [X]HIV disease resulting in other bacterial infections        | Definite                 |
| AyuC800 | READ       | [X]HIV disease resulting in other malignant neoplasms         | Definite                 |
| 43C3.11 | READ       | HIV positive                                                  | Definite                 |
| A788y00 | READ       | Human immunodeficiency virus with other clinical findings     | Definite                 |
| Eu02400 | READ       | [X]Dementia in human immunodef virus [HIV] disease            | Definite                 |
| ZV01A00 | READ       | [V]Asymptomatic human immunodeficiency virus infection status | Definite                 |
| A789400 | READ       | HIV disease resulting in multiple infections                  | Definite                 |
| AyuC500 | READ       | [X]HIV disease resulting/unspsc infectious+parasitic disease  | Definite                 |
| AyuC900 | READ       | [X]HIV disease resulting in unspecified malignant neoplasm    | Definite                 |
| AyuCC00 | READ       | [X]HIV disease resulting in other specified conditions        | Definite                 |
| 43C3.00 | READ       | HTLV-3 antibody positive                                      | Definite                 |
| A788W00 | READ       | HIV disease resulting in unspecified malignant neoplasm       | Definite                 |
| A789X00 | READ       | HIV dis reslt/oth mal neopl/lymph,h'matopoetc+                | Definite                 |
| AyuC300 | READ       | [X]HIV disease resulting in multiple infections               | Definite                 |
| AyuC400 | READ       | [X]HIV disease resulting/other infectious+parasitic diseases  | Definite                 |
| AyuC600 | READ       | [X]HIV disease resulting in other non-Hodgkin's lymphoma      | Definite                 |
| A788600 | READ       | Human immunodeficiency virus with secondary cancers           | Definite                 |
| A788z00 | READ       | Acquired human immunodeficiency virus infection syndrome NOS  | Definite                 |
| A789A00 | READ       | HIV disease resulting in wasting syndrome                     | Definite                 |
| 65VE.00 | READ       | Notification of AIDS                                          | Definite                 |
| A788.11 | READ       | Human immunodeficiency virus infection                        | Definite                 |
| A788200 | READ       | HIV infection with persistent generalised lymphadenopathy     | Definite                 |
| A788300 | READ       | Human immunodeficiency virus with constitutional disease      | Definite                 |
| A788400 | READ       | Human immunodeficiency virus with neurological disease        | Definite                 |

**Appendix 2 (CONT'D): Read & OXMIS codes denoting HIV positive status used to identify HIV positive patients who have their HIV positive status recorded in primary care.**

| Code    | Read/OXMIS | Code description                                              | Certainty of HIV+ status |
|---------|------------|---------------------------------------------------------------|--------------------------|
| A788V00 | READ       | HIV disease resulting in multiple diseases CE                 | Definite                 |
| A789100 | READ       | HIV disease resulting in cytomegaloviral disease              | Definite                 |
| AyuC.00 | READ       | [X]Human immunodeficiency virus disease                       | Definite                 |
| AyuCD00 | READ       | [X]Unspecified human immunodeficiency virus [HIV] disease     | Definite                 |
| A789000 | READ       | HIV disease resulting in mycobacterial infection              | Definite                 |
| A789900 | READ       | HIV disease resulting in lymphoid interstitial pneumonitis    | Definite                 |
| AyuCB00 | READ       | [X]HIV disease result/haematological+immunologic abnorms,NEC  | Definite                 |
| R109.00 | READ       | [D]Laboratory evidence of human immunodeficiency virus [HIV]  | Definite                 |
| ZV01A00 | READ       | [V]Asymptomatic human immunodeficiency virus infection status | Definite                 |
| 799MD   | OXMIS      | AIDS                                                          | Definite                 |
| 799CA   | OXMIS      | AIDS CARRIER                                                  | Definite                 |
| L1111PV | OXMIS      | HIV ANTIBODY TEST POSITIVE                                    | Definite                 |
| L7990A  | OXMIS      | ACQUIRED IMMUNE DEFICIENCY SYNDROME                           | Definite                 |
| L 153P  | OXMIS      | HTVL-AIDS-III ANTIBODY TEST POSITIVE                          | Definite                 |
| 43V1.00 | READ       | Absolute CD4 count                                            | Ambiguous                |
| AyuD800 | READ       | [X]Retrovirus infections, not elsewhere classified            | Ambiguous                |
| AyuKM00 | READ       | [X]Retrovirus/cause of diseases classified to other chapters  | Ambiguous                |
| 43VE.00 | READ       | CD4/CD8 ratio                                                 | Ambiguous                |
| A7y0100 | READ       | Retrovirus as cause of diseases classified to other chapters  | Ambiguous                |
| 43VH.00 | READ       | Percentage CD4 count                                          | Ambiguous                |
| 4J34.00 | READ       | HIV viral load                                                | Ambiguous                |
| 4J35.00 | READ       | HIV p24 antigen level                                         | Ambiguous                |
| 43h2.00 | READ       | HIV 1 PCR                                                     | Ambiguous                |
| 43j7.00 | READ       | HIV 1 nucleic acid detection                                  | Ambiguous                |
| 43Vo.00 | READ       | Absolute CD4 (T4 cells) count                                 | Ambiguous                |
| 43Vp.00 | READ       | Percentage CD4 (T4 cells) count                               | Ambiguous                |

**Appendix 3: Pregnancy/Delivery/Abortion medcodes (Jackson *et al*<sup>27</sup>)**

| medcode | readcode | readterm                                   |
|---------|----------|--------------------------------------------|
| 52685   | ZV23000  | [V]Pregnancy with history of infertility   |
| 3030    | 4654     | Urine pregnancy test positive              |
| 73535   | L13z100  | Unspecified pregnancy vomiting - delivered |
| 53514   | Z22D300  | Uncertain viability of pregnancy           |
| 11422   | Z226.00  | Pregnancy problem                          |
| 20623   | ZV4J000  | [V]Problems related to unwanted pregnancy  |
| 99247   | L13y200  | Other pregnancy vomiting - not delivered   |
| 56451   | L13zz00  | Unspecified pregnancy vomiting NOS         |
| 14644   | L166z11  | UTI - urinary tract infection in pregnancy |
| 32975   | 6166     | Pregnant, diaphragm failure                |

|        |         |                                                              |
|--------|---------|--------------------------------------------------------------|
| 23495  | L265.00 | Small-for-dates fetus in pregnancy                           |
| 3766   | L10..00 | Haemorrhage in early pregnancy                               |
| 56953  | Z235400 | Pendulous pregnant abdomen                                   |
| 40279  | 7E19012 | Fimbrial extraction of tubal pregnancy                       |
| 29122  | 7E19011 | Removal of ectopic pregnancy from fallopian tube             |
| 1748   | 7E08400 | Suction termination of pregnancy                             |
| 106170 | L21zz00 | Multiple pregnancy NOS                                       |
| 5357   | 7E08500 | Dilation of cervix and extraction termination of pregnancy   |
| 14899  | 621Z.00 | Patient pregnant NOS                                         |
| 61563  | L161300 | Oedema or excessive weight gain in pregnancy - not delivered |
| 64523  | L091z00 | Delayed/excess haemorrhage NOS following abortive pregnancy  |
| 20621  | ZV25313 | [V]Admission for termination of pregnancy                    |
| 20910  | ZV25311 | [V]Admission for termination of pregnancy (TOP)              |
| 70149  | L16A100 | Glycosuria during pregnancy - delivered                      |
| 54677  | L167200 | Liver disorder in pregnancy - not delivered                  |
| 102576 | L051711 | Incomplete termination of pregnancy                          |
| 36903  | 67AZ.00 | Pregnancy advice NOS                                         |
| 46448  | Q486.00 | Fetal death due to termination of pregnancy                  |
| 109697 | 6556    | Pertussis vaccination in pregnancy                           |
| 85961  | 44Cy.00 | Serum pregnancy associated plasma protein-A MoM measurement  |
| 20307  | L091.00 | Delayed/excessive haemorrhage following abortive pregnancy   |
| 37163  | L150z00 | Post-term pregnancy NOS                                      |
| 94473  | L211z00 | Triplet pregnancy NOS                                        |
| 47489  | Z22A800 | Undiagnosed pregnancy                                        |
| 1668   | L182500 | Iron deficiency anaemia of pregnancy                         |
| 61576  | L211000 | Triplet pregnancy unspecified                                |
| 25501  | Z22A100 | Low risk pregnancy                                           |
| 40633  | Z22A600 | Teenage pregnancy                                            |
| 104440 | 4Q3N.00 | Pregnancy associated plasma protein A level                  |
| 45413  | L263A11 | Maternal care for reduced fetal heart rate during pregnancy  |
| 14994  | 6174    | Pregnant, sheath failure                                     |
| 24170  | L15..00 | Prolonged or post-term pregnancy                             |
| 66390  | Q0z..00 | Maternal problem unrelated preg affecting fetus/neonate NOS  |
| 27833  | L13y.00 | Other pregnancy vomiting                                     |
| 55338  | L123000 | Transient hypertension of pregnancy unspecified              |
| 99956  | L168400 | Fatigue during pregnancy with postnatal complication         |
| 71314  | L093.00 | Renal failure following abortive pregnancy                   |
| 106735 | 9mK0.00 | Pertussis vaccination in pregnancy invitation first letter   |
| 31449  | 6294    | No A/N care: not known preg.                                 |
| 100670 | L181100 | Thyroid dysfunction during pregnancy - baby delivered        |
| 54866  | L030.00 | Abdominal pregnancy                                          |
| 38882  | L123600 | Transient hypertension of pregnancy                          |
| 61995  | L03yz00 | Other ectopic pregnancy NOS                                  |
| 5044   | 13H7.00 | Unwanted pregnancy                                           |
| 25131  | Z22AD11 | Reported conception - pregnancy                              |

|        |         |                                                              |
|--------|---------|--------------------------------------------------------------|
| 21467  | L03y200 | Membranous pregnancy                                         |
| 48304  | L10z200 | Early pregnancy haemorrhage NOS - not delivered              |
| 37693  | 13Hd.00 | Teenage pregnancy                                            |
| 27980  | L166700 | Infections of the genital tract in pregnancy                 |
| 2638   | L1...00 | Pregnancy complications                                      |
| 99933  | L092100 | Bowel damage following abortive pregnancy                    |
| 41122  | L10zz00 | Early pregnancy haemorrhage NOS                              |
| 37348  | Lyu2500 | [X]Other specified pregnancy-related conditions              |
| 96757  | L411513 | Vulval varices in pregnancy                                  |
| 59634  | L411512 | Vaginal varices in pregnancy                                 |
| 99237  | L411511 | Perineal varices in pregnancy                                |
| 27451  | L166000 | Genitourinary tract infection in pregnancy unspecified       |
| 110129 | 6556000 | Pertussis vacc in pregnancy given by other healthcre providr |
| 107485 | Q014000 | Fetus or neonate affected by unspecified ectopic pregnancy   |
| 18258  | L167.00 | Liver disorder in pregnancy                                  |
| 42015  | L16y.00 | Other pregnancy complications                                |
| 25028  | L09z.00 | Complication NOS following abortion/ectopic/molar pregnancy  |
| 44734  | 62O8.00 | Pregnancy prolonged - 42 weeks                               |
| 23831  | ZV22y00 | [V]Other specified pregnant state                            |
| 41587  | L210z00 | Twin pregnancy NOS                                           |
| 24063  | 62O7.00 | Pregnancy prolonged - 41 weeks                               |
| 44650  | L0y..00 | Other specified pregnancy with abortive outcome              |
| 61284  | L210200 | Twin pregnancy with antenatal problem                        |
| 54288  | Z22D311 | Query viability of pregnancy                                 |
| 34938  | L212.00 | Quadruplet pregnancy                                         |
| 102494 | 8Hh3.00 | Self referral to termination of pregnancy service            |
| 1686   | 7E08600 | Termination of pregnancy NEC                                 |
| 70214  | L21z100 | Multiple pregnancy NOS - delivered                           |
| 64247  | Z235.00 | Observation of shape of pregnant abdomen                     |
| 23751  | L266.00 | Large-for-dates fetus in pregnancy                           |
| 39359  | L385.00 | Failed or difficult intubation during pregnancy              |
| 64500  | L183.11 | Pregnancy and drug dependence                                |
| 73917  | L10y200 | Other haemorrhage in early pregnancy - not delivered         |
| 255    | L05..12 | Termination of pregnancy                                     |
| 15433  | L21..00 | Multiple pregnancy                                           |
| 20439  | L123.00 | Transient hypertension of pregnancy                          |
| 16775  | L16E.00 | Pregnancy pruritus                                           |
| 53921  | L161000 | Oedema or excessive weight gain in pregnancy, unspecified    |
| 44770  | L191.00 | Continuing pregnancy after abortion of one fetus or more     |
| 29205  | 4453    | Serum pregnancy test positive                                |
| 46577  | 66AX.00 | Diabetes: shared care in pregnancy - diabetol and obstet     |
| 73455  | Q015200 | Fetus or neonate affected by triplet pregnancy               |
| 41625  | L13yz00 | Other pregnancy vomiting NOS                                 |
| 60345  | M240500 | Alopecia of pregnancy                                        |
| 107957 | 115V.00 | No history of ectopic pregnancy                              |

|        |         |                                                              |
|--------|---------|--------------------------------------------------------------|
| 6580   | ZV23800 | [V]Supervision of high-risk pregnancy due to social problems |
| 61182  | L211100 | Triplet pregnancy - delivered                                |
| 30365  | Z22AA00 | Wanted pregnancy                                             |
| 26852  | ZV23400 | [V]Pregnancy with other poor obstetric history               |
| 30817  | 6212    | Pregnant - blood test confirms                               |
| 72014  | L212z00 | Quadruplet pregnancy NOS                                     |
| 12521  | L161.11 | Excessive weight gain in pregnancy                           |
| 41959  | L171300 | Maternal gonorrhoea in pregnancy - baby not yet delivered    |
| 26201  | Z22AC00 | Pregnancy with uncertain dates                               |
| 49519  | Z229.00 | Observation of position of pregnancy                         |
| 107713 | L21y200 | Other multiple pregnancy with antenatal problem              |
| 36235  | 67A4.00 | Pregnancy exercise advice                                    |
| 105511 | L21z.00 | Multiple pregnancy NOS                                       |
| 65783  | L030000 | Delivery of viable fetus in abdominal pregnancy              |
| 106267 | L03y300 | Combined or heterotopic pregnancy                            |
| 2278   | 8M6..00 | Requests pregnancy termination                               |
| 110448 | Lyu0.00 | [X]Pregnancy with abortive outcome                           |
| 99006  | Q014100 | Fetus or neonate affected by abdominal ectopic pregnancy     |
| 40357  | L2D..00 | Retained intrauterine contraceptive device in pregnancy      |
| 54293  | Q015.00 | Fetus or neonate affected by multiple pregnancy              |
| 22557  | Z22B100 | Single pregnancy                                             |
| 15338  | 621A.00 | Pregnancy unplanned ? wanted                                 |
| 6649   | L166800 | Urinary tract infection complicating pregnancy               |
| 49855  | Q015100 | Fetus or neonate affected by twin pregnancy                  |
| 40825  | Z22B800 | Undiagnosed multiple pregnancy                               |
| 35509  | 624..00 | A/N care: precious pregnancy                                 |
| 20197  | L211.00 | Triplet pregnancy                                            |
| 46270  | ZV22z00 | [V]Unspecified pregnant state                                |
| 67098  | L183300 | Drug dependence during pregnancy - baby not yet delivered    |
| 23373  | L150.00 | Post-term pregnancy                                          |
| 1357   | L210100 | Twin pregnancy - delivered                                   |
| 45729  | Z22D.00 | Observation of viability of pregnancy                        |
| 44733  | L0z..00 | Pregnancy with abortive outcome NOS                          |
| 11760  | L13z.00 | Unspecified pregnancy vomiting                               |
| 18500  | Z22D100 | Viable pregnancy                                             |
| 69686  | L417000 | Cerebral venous thrombosis in pregnancy                      |
| 53661  | L13z200 | Unspecified pregnancy vomiting - not delivered               |
| 22183  | 957..11 | Prescription exempt form-preg                                |
| 106378 | 9mK..00 | Pertussis vaccination in pregnancy invitation                |
| 12230  | L263900 | Maternal care for fetal tachycardia during pregnancy         |
| 22193  | Z229100 | Intrauterine pregnancy                                       |
| 15061  | L13..12 | Hyperemesis of pregnancy                                     |
| 14877  | 621B.00 | Pregnant - ? planned                                         |
| 27672  | 7E13100 | Excision of ectopic ovarian pregnancy                        |
| 1744   | L03..00 | Ectopic pregnancy                                            |

|        |         |                                                              |
|--------|---------|--------------------------------------------------------------|
| 5693   | L16A.00 | Glycosuria during pregnancy                                  |
| 36394  | L16C.00 | Pregnancy induced oedema+proteinuria without hypertension    |
| 73914  | L412511 | Thrombophlebitis of legs in pregnancy                        |
| 53849  | L16y000 | Other pregnancy complication unspecified                     |
| 105943 | L165300 | Asymptomatic bacteriuria in pregnancy - not delivered        |
| 36421  | L167z00 | Liver disorder in pregnancy NOS                              |
| 25872  | L16yz00 | Other pregnancy complication NOS                             |
| 60309  | Q0y..00 | Maternal problems unrelated preg affecting fetus/neonate OS  |
| 67728  | L150200 | Post-term pregnancy - not delivered                          |
| 28103  | Z22A300 | Concealed pregnancy                                          |
| 21849  | L031.00 | Tubal pregnancy                                              |
| 54577  | L210000 | Twin pregnancy unspecified                                   |
| 105654 | L10y100 | Other haemorrhage in early pregnancy - delivered             |
| 53685  | L410500 | Varicose veins of legs in pregnancy                          |
| 68930  | L168100 | Fatigue during pregnancy - delivered                         |
| 68840  | L416200 | Haemorrhoids in pregnancy and puerperium - deliv + p/n comp  |
| 53167  | L188300 | Abnormal GTT during pregnancy - baby not yet delivered       |
| 45862  | 7E07114 | Curettage of uterus for termination of pregnancy NEC         |
| 64366  | L412500 | Superficial thrombophlebitis in pregnancy                    |
| 13968  | 584D.00 | Antenatal ultrasound confirms intra-uterine pregnancy        |
| 14925  | L10z.00 | Early pregnancy haemorrhage NOS                              |
| 61935  | L185.11 | Congenital heart disease in pregnancy                        |
| 103059 | 7E07111 | Curettage of term pregnancy NEC                              |
| 16384  | 7E07113 | Curettage of uterus for termination of pregnancy NEC         |
| 23421  | 615C.00 | IUD failure - pregnant                                       |
| 3029   | L166500 | Infections of kidney in pregnancy                            |
| 106517 | L176100 | Other maternal viral disease in pregnancy - baby delivered   |
| 40964  | L192.00 | Continuing preg after intrauterine death one fetus or more   |
| 1850   | 7F06012 | Shirodkar suture in pregnancy                                |
| 30302  | 7F...12 | Pregnancy operations                                         |
| 28107  | L161.00 | Oedema or excessive weight gain in pregnancy no hypertension |
| 85960  | 44Cz.00 | Plasma pregnancy associated plasma protein-A MoM             |
| 44057  | ZV23111 | [V]Pregnancy with history of hydatidiform mole               |
| 37573  | Z22B900 | Continuing pregnancy after abortion of sibling fetus         |
| 68694  | Z22C.00 | Observation of measures of pregnancy                         |
| 49559  | L180300 | Diabetes mellitus during pregnancy - baby not yet delivered  |
| 29786  | L416600 | Haemorrhoids in pregnancy                                    |
| 57059  | L187300 | Orthopaedic disorder in pregnancy - baby not yet delivered   |
| 23334  | L162.11 | Albuminuria in pregnancy without hypertension                |
| 92579  | L162.13 | Uraemia in pregnancy without hypertension                    |
| 38312  | L162.12 | Nephropathy NOS in pregnancy without hypertension            |
| 22215  | Z22A200 | High risk pregnancy                                          |
| 38346  | ZV22000 | [V]First normal pregnancy supervision                        |
| 15318  | 6214    | Pregnant - on history                                        |
| 41504  | L13y000 | Other pregnancy vomiting unspecified                         |



|        |         |                                                              |
|--------|---------|--------------------------------------------------------------|
| 72019  | L132200 | Late pregnancy vomiting - not delivered                      |
| 37386  | 8B68.00 | Pregnancy prophylactic therapy                               |
| 60877  | L263800 | Maternal care for fetal decelerations during pregnancy       |
| 107225 | L165z00 | Asymptomatic bacteriuria in pregnancy NOS                    |
| 54942  | L123100 | Transient hypertension of pregnancy - delivered              |
| 54701  | ZV23y00 | [V]Other specified high-risk pregnancy                       |
| 63825  | Q014.00 | Fetus or neonate affected by ectopic pregnancy               |
| 94804  | 67AB.00 | Preg. prescription exempt adv.                               |
| 72835  | Q01z.00 | Fetus/neonate affected by maternal complic pregnancy NOS     |
| 99008  | Q014300 | Fetus or neonate affected by tubal ectopic pregnancy         |
| 110868 | L181000 | Thyroid dysfunction - unspec whether in pregnancy/puerperium |
| 66649  | L41z500 | Venous complication of pregnancy, unspecified                |
| 26286  | L18A000 | Cholestasis of pregnancy                                     |
| 17947  | 62a..00 | Pregnancy review                                             |
| 103104 | L176300 | Other maternal viral dis.in pregnancy-baby not yet delivered |
| 109932 | Z235211 | Globular pregnant abdomen                                    |
| 68004  | Q01..00 | Fetus/neonate affected by maternal complication of pregnancy |
| 20240  | 6216    | Pregnant - planned                                           |
| 65834  | ZV23200 | [V]Pregnancy with history of abortion                        |
| 7916   | Z254500 | Delivered by caesarean section - pregnancy at term           |
| 21119  | L182300 | Anaemia during pregnancy - baby not yet delivered            |
| 9408   | L10y.11 | Bleeding in early pregnancy                                  |
| 64099  | L168000 | Fatigue during pregnancy unspecified                         |
| 10278  | L180800 | Diabetes mellitus arising in pregnancy                       |
| 2602   | L166.11 | Cystitis of pregnancy                                        |
| 13165  | 621..00 | Patient currently pregnant                                   |
| 9986   | Z212.11 | Pregnancy care                                               |
| 66594  | L186.11 | Heart disease during pregnancy                               |
| 35158  | Z225.00 | Normal pregnancy                                             |
| 93800  | Z235100 | Ovoid pregnant abdomen                                       |
| 73727  | L168z00 | Fatigue during pregnancy NOS                                 |
| 55889  | L175300 | Maternal rubella during pregnancy - baby not yet delivered   |
| 7517   | 621C.00 | Unplanned pregnancy                                          |
| 53908  | Lyu0000 | [X]Other ectopic pregnancy                                   |
| 34173  | L12B.00 | Proteinuric hypertension of pregnancy                        |
| 35514  | 624Z.00 | A/N care: precious preg. NOS                                 |
| 15065  | 8B7..11 | Pregnancy vitamin/iron prophyl                               |
| 109465 | L184300 | Mental disorder during pregnancy - baby not yet delivered    |
| 24038  | 13S..00 | Pregnancy benefits                                           |
| 16215  | 6211    | Pregnant - urine test confirms                               |
| 35592  | 6213    | Pregnant - V.E. confirms                                     |
| 25254  | Z21..00 | Care relating to reproduction and pregnancy                  |
| 46609  | Z22C800 | Number of lost pregnancies                                   |
| 29692  | 615C.11 | Pregnant, IUD failure                                        |
| 50440  | Z22A500 | Biochemical pregnancy                                        |

|        |         |                                                       |
|--------|---------|-------------------------------------------------------|
| 56252  | ZV22100 | [V]Other normal pregnancy supervision                 |
| 21196  | ZV23.00 | [V]High-risk pregnancy supervision                    |
| 30618  | Z22AB00 | Unplanned pregnancy                                   |
| 10775  | 8B74.00 | Iron supplement in pregnancy                          |
| 48534  | ZV23100 | [V]Pregnancy with history of trophoblastic disease    |
| 73559  | L13z000 | Unspecified pregnancy vomiting unspecified            |
| 13984  | 584E.00 | Antenatal ultrasound confirms ectopic pregnancy       |
| 9754   | Z22A400 | Early stage of pregnancy                              |
| 67893  | L2C..00 | Malnutrition in pregnancy                             |
| 70993  | L16Az00 | Glycosuria during pregnancy NOS                       |
| 23438  | L2z..00 | Risk factors in pregnancy NOS                         |
| 105694 | ZVu2300 | [X]Supervision of other normal pregnancy              |
| 53097  | Z22C313 | Duration of pregnancy                                 |
| 58156  | L03y.00 | Other ectopic pregnancy                               |
| 55730  | ZV22.11 | [V]Supervision of normal pregnancy                    |
| 5709   | 62...13 | Pregnancy care                                        |
| 100104 | 95B..00 | Health in Pregnancy grant claim form issued           |
| 72883  | Lyu2100 | [X]Other vomiting complicating pregnancy              |
| 59588  | L411500 | Genital varices in pregnancy                          |
| 67863  | Z22B.00 | Observation of quantity of pregnancy                  |
| 12890  | Z227.00 | Confirmation of pregnancy                             |
| 47080  | L162.00 | Unspecified renal disease in pregnancy                |
| 3191   | L16y500 | Abdominal pain in pregnancy                           |
| 27740  | L16..00 | Other pregnancy complication NEC                      |
| 67698  | L150000 | Post-term pregnancy unspecified                       |
| 29623  | 62H4.00 | Rh screen - 2nd preg. sample                          |
| 21438  | 7E08411 | Vacuum termination of pregnancy                       |
| 51298  | 6215    | Pregnant - on abdom. palpation                        |
| 35912  | ZV22200 | [V]Pregnancy confirmed                                |
| 99980  | L168300 | Fatigue during pregnancy - not delivered              |
| 29593  | 6223    | Antenatal care: 3rd pregnancy                         |
| 49407  | L2B..00 | Low weight gain in pregnancy                          |
| 52583  | L168.00 | Fatigue during pregnancy                              |
| 69599  | L21y.00 | Other multiple pregnancy                              |
| 39117  | L126500 | Eclampsia in pregnancy                                |
| 863    | L398200 | Caesarean section - pregnancy at term                 |
| 90776  | 62a..11 | Review of pregnancy                                   |
| 91254  | Z235200 | Rounded pregnant abdomen                              |
| 109416 | 62H5.00 | Rh screen - 3rd preg. sample                          |
| 69815  | 62H3.00 | Rh screen - 1st preg. sample                          |
| 11989  | 8HHV.00 | Referral for termination of pregnancy                 |
| 37701  | Z22A.00 | Observation of pattern of pregnancy                   |
| 33441  | L511.00 | Maternal care for viable fetus in abdominal pregnancy |
| 106957 | 9Nif.00 | Did not attend pertussis vaccination in pregnancy     |
| 24603  | L10y.00 | Other haemorrhage in early pregnancy                  |

|        |         |                                                             |
|--------|---------|-------------------------------------------------------------|
| 47608  | L177.00 | Infections of bladder in pregnancy                          |
| 63751  | L16A300 | Glycosuria during pregnancy - not delivered                 |
| 15418  | L166300 | Genitourinary tract infection in pregnancy - not delivered  |
| 59313  | Z22BA00 | Contin pregnancy after intrauterine death of sibling fetus  |
| 69722  | ZV23z00 | [V]Unspecified high-risk pregnancy                          |
| 14842  | 6217    | Pregnant - unplanned - wanted                               |
| 42614  | Z22..00 | Pregnancy observations                                      |
| 53490  | L178.00 | Infections of urethra in pregnancy                          |
| 43344  | ZV61800 | [V]Illegitimate pregnancy                                   |
| 10173  | Z23D200 | Pregnant abdomen observation                                |
| 52685  | ZV23000 | [V]Pregnancy with history of infertility                    |
| 50512  | L031z00 | Tubal pregnancy NOS                                         |
| 49502  | L228.00 | Multiple pregnancy with malpresentation                     |
| 50058  | 13SZ.00 | Pregnancy benefit NOS                                       |
| 69011  | L132000 | Late pregnancy vomiting unspecified                         |
| 10185  | L13..00 | Excessive pregnancy vomiting                                |
| 10184  | 67A3.00 | Pregnancy smoking advice                                    |
| 97349  | L121300 | Renal hypertension in preg/childbirth/puerp - not delivered |
| 101518 | L132z00 | Late pregnancy vomiting NOS                                 |
| 71730  | L123300 | Transient hypertension of pregnancy - not delivered         |
| 31162  | L165.00 | Asymptomatic bacteriuria in pregnancy                       |
| 52048  | Z22AB11 | Accidental pregnancy                                        |
| 54938  | L162000 | Unspecified renal disease in pregnancy unspecified          |
| 62358  | L167000 | Liver disorder in pregnancy unspecified                     |
| 110888 | 67It.00 | Advice on risk harm to mother from maternl medictn dur preg |
| 38771  | Lyu2200 | [X]Other venous complications in pregnancy                  |
| 15634  | L166z00 | Genitourinary tract infection in pregnancy NOS              |
| 43000  | L16D.00 | Excessive weight gain in pregnancy                          |
| 14651  | 13H8.00 | Illegitimate pregnancy                                      |
| 108236 | 621D.00 | Concealed pregnancy                                         |
| 15033  | ZV61900 | [V]Other unwanted pregnancy                                 |
| 67164  | L18z300 | Medical condition NOS in pregnancy - baby not yet delivered |
| 93303  | ZV22400 | [V]Supervision of other normal pregnancy                    |
| 6184   | ZV22.00 | [V]Normal pregnancy                                         |
| 48281  | Z22D200 | Non-viable pregnancy                                        |
| 29746  | 8B75.00 | Vitamin supplement - pregnancy                              |
| 16611  | ZV22300 | [V]Pregnant state, incidental                               |
| 1130   | L210.00 | Twin pregnancy                                              |
| 52221  | L03y000 | Cervical pregnancy                                          |
| 59650  | Z235300 | Transversely enlarged pregnant abdomen                      |
| 69327  | L10yz00 | Other haemorrhage in early pregnancy NOS                    |
| 51956  | L212200 | Quadruplet pregnancy with antenatal problem                 |
| 10306  | Z22C314 | Weeks pregnant                                              |
| 45965  | Z22C311 | Pregnancy duration                                          |
| 26055  | L263A00 | Maternal care for fetal bradycardia during pregnancy        |

|        |         |                                                             |
|--------|---------|-------------------------------------------------------------|
| 61301  | L10y000 | Other haemorrhage in early pregnancy unspecified            |
| 10261  | L2...00 | Risk factors in pregnancy                                   |
| 106268 | 8IEc.00 | Pertussis vaccination in pregnancy declined                 |
| 24944  | L163300 | Pregnancy care of habitual aborter                          |
| 20118  | 62O..12 | Static weight gain pregnancy                                |
| 58142  | L16A000 | Glycosuria during pregnancy unspecified                     |
| 61835  | L161z00 | Oedema or excessive weight gain in pregnancy NOS            |
| 23995  | L15..11 | Post-term pregnancy                                         |
| 35646  | L123z00 | Transient hypertension of pregnancy NOS                     |
| 93895  | Z22B500 | Quintuplet pregnancy                                        |
| 65256  | L164.00 | Peripheral neuritis in pregnancy                            |
| 67975  | L166.00 | Genitourinary tract infections in pregnancy                 |
| 36006  | L16z.00 | Pregnancy complication NOS                                  |
| 61466  | Z22A211 | HRP - High risk pregnancy                                   |
| 26866  | L2y..00 | Other specified risk factors in pregnancy                   |
| 35855  | L15z.00 | Prolonged pregnancy NOS                                     |
| 2937   | L175.11 | Rubella contact in pregnancy                                |
| 50421  | Z22A900 | Unwanted pregnancy                                          |
| 37048  | 6282    | A/N care:10yrs+since last preg                              |
| 49193  | 67A7.11 | Care of teeth advice -in preg.                              |
| 11986  | 7E13300 | Excision of ruptured ectopic tubal pregnancy                |
| 97034  | 67AE.00 | Folic acid advice in first trimester of pregnancy           |
| 106737 | 9mK2.00 | Pertussis vaccination in pregnancy invitation third letter  |
| 102362 | 389B.00 | Assessment for termination of pregnancy                     |
| 55618  | ZV23600 | [V]Supervis/pregnancy wth history insufficnt antenatal care |
| 37038  | Z23D100 | Girth of pregnant abdomen                                   |
| 29631  | 6222    | Antenatal care: 2nd pregnancy                               |
| 65555  | L132.00 | Late vomiting of pregnancy                                  |
| 107698 | Z236300 | Pregnant uterus displaced laterally                         |
| 4536   | 621..11 | Pregnancy confirmed                                         |
| 111540 | L415500 | Other phlebitis in pregnancy                                |
| 32493  | Z22AD00 | Presentation of pregnancy                                   |
| 44729  | L031000 | Fallopian tube pregnancy                                    |
| 43140  | 67A2.00 | Diet in pregnancy advice                                    |
| 91888  | L181300 | Thyroid dysfunction in pregnancy - baby not yet delivered   |
| 12837  | 7F2B100 | Ultrasound monitoring of early pregnancy                    |
| 30351  | 67A6.00 | Drugs in pregnancy advice                                   |
| 15567  | 6218    | Pregnant -unplanned-not wanted                              |
| 33724  | L03z.00 | Ectopic pregnancy NOS                                       |
| 100892 | Lyu2400 | [X]Other+unspcf genitourinary tract infection in pregnancy  |
| 127    | 62...00 | Patient pregnant                                            |
| 13672  | 8HHf.00 | Refer to early pregnancy unit                               |
| 32073  | L0...00 | Pregnancy with abortive outcome                             |
| 64292  | L16y300 | Other pregnancy complication - not delivered                |
| 106425 | 62NL.00 | Antenatal 31 week examination                               |

|        |         |                                                              |
|--------|---------|--------------------------------------------------------------|
| 109543 | L332200 | Cord tangled with compression with antenatal problem         |
| 102300 | Lyu2A00 | [X]Abnormal finding on antenatal screening of mother         |
| 111263 | L230200 | Disproportion - major pelvic abnormality with antenatal prob |
| 55111  | 6B22.00 | Sure Start antenatal visit                                   |
| 13418  | 62W..00 | Antenatal blood tests                                        |
| 61533  | L270200 | Polyhydramnios with antenatal problem                        |
| 14085  | 62GB.00 | Antenatal ultrasounds scan at 4-8 weeks                      |
| 42326  | 62KZ.00 | Antenatal syphilis screen NOS                                |
| 18536  | 62b..00 | Antenatal HIV screening                                      |
| 99475  | 68b5.00 | Antenatal screening result pending                           |
| 13168  | 62NZ.00 | Antenatal examination NOS                                    |
| 63448  | Z675.00 | Antenatal class                                              |
| 100596 | 68b3.00 | Antenatal screening shows significant disorder               |
| 67926  | ZV28z00 | [V]Unspecified antenatal screening                           |
| 16613  | 584C.00 | Antenatal ultrasound result received                         |
| 23667  | L413.00 | Antenatal deep vein thrombosis                               |
| 53683  | L452300 | Obstetric nonpurulent mastitis with antenatal complication   |
| 104764 | L236200 | Hydrocephalic disproportion with antenatal problem           |
| 56967  | 9NV1.00 | Antenatal clinic                                             |
| 13417  | 62K..00 | Antenatal syphilis screen                                    |
| 108099 | L39z300 | Complications of labour and delivery NOS with antenatal prob |
| 70096  | L224200 | Transverse lie with antenatal problem                        |
| 104359 | ZVu2600 | [X]Other antenatal screening based on amniocentesis          |
| 294    | 62...11 | Antenatal care                                               |
| 104178 | Lyu2600 | [X]Other abnormal findings on antenatal screening of mother  |
| 27056  | 62GD.00 | Antenatal ultrasound scan at 17-22 weeks                     |
| 98481  | 68b4.00 | Repeat antenatal screening required                          |
| 14084  | 62GC.00 | Antenatal ultrasound scan at 9-16 weeks                      |
| 28732  | 62c..00 | Antenatal screening                                          |
| 6095   | 9N1N.00 | Seen in antenatal clinic                                     |
| 99849  | 68bA.00 | Antenatal screening, at risk couple identified               |
| 21957  | 62l..11 | AFP test - antenatal                                         |
| 73765  | L311200 | Secondary uterine inertia with antenatal problem             |
| 102246 | L265200 | Small-for-dates with antenatal problem                       |
| 73191  | L226200 | Brow presentation with antenatal problem                     |
| 69254  | L264200 | Intrauterine death with antenatal problem                    |
| 104766 | L30z200 | Obstructed labour NOS with antenatal problem                 |
| 109071 | 38B6.00 | Antenatal risk assessment                                    |
| 7845   | Z212.00 | Antenatal care                                               |
| 30378  | L244312 | Rectocele complicating antenatal care - baby not delivered   |
| 101938 | L390300 | Maternal distress with antenatal problem                     |
| 90277  | L350200 | Rupture of uterus before labour with antenatal problem       |
| 97259  | 68b6.00 | Antenatal screening declined                                 |
| 111183 | 8IHD.00 | Health visitor antenatal visit declined                      |
| 106588 | 62NJ.00 | Antenatal 22 week examination                                |

|        |         |                                                              |
|--------|---------|--------------------------------------------------------------|
| 30801  | 62OZ.00 | Misc. antenatal data NOS                                     |
| 49665  | ZV28600 | [V]Antenatal screening for chromosomal anomalies             |
| 21543  | 622..00 | Antenatal care: gravida No.                                  |
| 109313 | 9Nil.00 | Did not attend antenatal appointment                         |
| 102755 | 8CEM.00 | Downs syndrome antenatal screening information leaflet given |
| 37985  | L2AX.00 | Abnormal finding on antenatal screening of mother            |
| 91272  | L440300 | Puerperal cerebrovascular disorder with antenatal comp       |
| 99286  | L28y200 | Other amniotic/membrane problem with antenatal problem       |
| 99479  | L267200 | Other placental conditions with antenatal problem            |
| 10056  | 62N..00 | Antenatal examinations                                       |
| 44401  | L305200 | Shoulder dystocia with antenatal problem                     |
| 35484  | 679E.00 | Antenatal education                                          |
| 103512 | L330200 | Prolapse of cord with antenatal problem                      |
| 99939  | L33y200 | Other umbilical cord complications with antenatal problem    |
| 101354 | L244311 | Cystocele complicating antenatal care - baby not delivered   |
| 39611  | 62GE.00 | Antenatal ultrasound scan at 22-40 weeks                     |
| 40597  | ZV28y00 | [V]Other specified antenatal screening                       |
| 70046  | L2A4.00 | Abnormal radiological finding on antenatal screen of mother  |
| 105047 | L2A2.00 | Abnormal cytological finding on antenatal screen of mother   |
| 96678  | L33z200 | Umbilical cord complications NOS with antenatal problem      |
| 15685  | L2A..00 | Abnormal findings on antenatal screening of mother           |
| 2029   | 62G..00 | Antenatal ultrasound scan                                    |
| 103787 | 1514100 | Estimated date of delivery by antenatal ultrasound scan      |
| 31570  | 6224    | Antenatal care: multip                                       |
| 97391  | L281200 | Premature rupture of membranes with antenatal problem        |
| 65725  | L413000 | Antenatal deep vein thrombosis unspecified                   |
| 13819  | 62F..00 | Antenatal amniocentesis                                      |
| 107186 | L266200 | Large-for-dates with antenatal problem                       |
| 16750  | 6221    | Antenatal care: primigravida                                 |
| 71851  | L229200 | Prolapsed arm with antenatal problem                         |
| 105865 | 67AJ.00 | Provision of information about antenatal screening           |
| 109043 | 9NFV.00 | Health visitor antenatal visit                               |
| 47928  | L280200 | Oligohydramnios with antenatal problem                       |
| 6298   | ZV28.00 | [V]Antenatal screening                                       |
| 45032  | 62O..00 | Misc. antenatal data                                         |
| 66496  | L222200 | Breech presentation with antenatal problem                   |
| 444    | 8HT9.00 | Referral to antenatal clinic                                 |
| 14083  | 62GZ.00 | Antenatal ultrasound scan NOS                                |
| 13419  | 62L..00 | Antenatal blood group screen                                 |
| 42120  | L2A0.00 | Abnormal haematologic find on antenatal screening of mother  |
| 13416  | 62M..00 | Antenatal sickle cell screen                                 |
| 69788  | L260200 | Fetal-maternal haemorrhage with antenatal problem            |
| 73734  | ZVu2900 | [X]Other antenatal screening                                 |
| 95107  | L312200 | Other uterine inertia with antenatal problem                 |
| 103677 | Eu32B00 | [X]Antenatal depression                                      |

|        |         |                                                              |
|--------|---------|--------------------------------------------------------------|
| 106923 | 62NK.00 | Antenatal 25 week examination                                |
| 108811 | L245300 | Cervical incompetence with antenatal problem                 |
| 73407  | L261200 | Rhesus isoimmunisation with antenatal problem                |
| 101980 | 65QG.00 | Antenatal screening shows non sig haemoglobinopathy carrier  |
| 44828  | L263200 | Fetal distress with antenatal problem                        |
| 45091  | 62Y..00 | Routine antenatal care                                       |
| 71862  | L323200 | Delayed delivery second twin with antenatal problem          |
| 71794  | L307200 | Other failed trial of labour with antenatal problem          |
| 51432  | 62FZ.00 | Antenatal amniocentesis NOS                                  |
| 97523  | 68b..00 | Antenatal screening status                                   |
| 28290  | L2A3.00 | Abnormal ultrasonic finding on antenatal screening of mother |
| 36226  | L2A1.00 | Abnormal biochemical finding on antenatal screen of mother   |
| 100502 | L413200 | Antenatal deep vein thrombosis with antenatal complication   |
| 61203  | L413z00 | Antenatal deep vein thrombosis NOS                           |
| 100578 | L255200 | Fetus with drug damage with antenatal problem                |
| 69072  | L262200 | Other blood-group isoimmunisation with antenatal problem     |
| 49617  | 622Z.00 | Antenatal care: gravida NOS                                  |
| 26873  | L413.11 | DVT - deep venous thrombosis, antenatal                      |
| 33009  | 6254    | A/N care: H/O child abuse                                    |
| 29610  | 62NB.00 | A/N 36 week examination                                      |
| 61162  | L250200 | Fetus with central nervous system malformation + a/n problem |
| 52044  | 6252    | A/N care: poor A/N attender                                  |
| 35513  | 6284    | A/N care: primip. > 30 years                                 |
| 26695  | 625Z.00 | A/N care: social risk NOS                                    |
| 55605  | 62NH.00 | A/N 42 week examination                                      |
| 30797  | 6233    | A/N care: grand multip                                       |
| 23013  | 6231    | A/N care: uncertain dates                                    |
| 36516  | 62F4.00 | A/N amniocentesis wanted                                     |
| 37046  | 628Z.00 | A/N risk NOS                                                 |
| 107506 | 62H2.00 | A/N Rh screen offered                                        |
| 25331  | 62O6.11 | Vaginal 'show' - A/N                                         |
| 64537  | 62GA.00 | A/N U/S scan for slow growth                                 |
| 13821  | 62F6.00 | A/N amniocentesis - normal                                   |
| 19772  | 62F3.00 | A/N amniocentesis - not wanted                               |
| 70840  | L240311 | Bicornuate uterus complicating a/n care, baby not delivered  |
| 33287  | 62F1.00 | A/N amniocentesis -not offered                               |
| 13171  | 62N8.00 | A/N 32 week examination                                      |
| 52049  | 62G3.00 | A/N U/S scan not wanted                                      |
| 33008  | 6285    | A/N care: multip. > 35 years                                 |
| 26696  | 6253    | A/N care: late booker                                        |
| 24219  | 62A..00 | A/N care provider                                            |
| 13308  | 625..00 | A/N care: social risk                                        |
| 26692  | 6236    | A/N care: poor obstetr history                               |
| 37222  | 62G1.00 | A/N U/S scan not offered                                     |
| 25391  | 62I..12 | Alpha-feto protein test - A/N                                |

|        |         |                                                              |
|--------|---------|--------------------------------------------------------------|
| 35512  | 6281    | A/N care: under 5ft tall                                     |
| 31251  | 627..00 | A/N care: gynae. risk                                        |
| 26551  | 62NE.00 | A/N 39 week examination                                      |
| 68089  | 62HZ.00 | A/N Rh antibody screen NOS                                   |
| 26691  | 6235    | A/N care: H/O perinatal death                                |
| 35826  | 62G6.00 | A/N U/S scan normal += dates                                 |
| 30885  | 62G4.00 | A/N U/S scan wanted                                          |
| 70289  | 62F9.00 | A/N amnio. for ? neural tube                                 |
| 26693  | 626..00 | A/N care: medical risk                                       |
| 73099  | L246311 | Polyp of cervix complicating a/n care- baby not delivered    |
| 20401  | L241311 | Uterine fibroid complicating a/n care, baby not delivered    |
| 65450  | 62F2.00 | A/N amniocentesis - offered                                  |
| 24236  | 62AZ.00 | A/N care provider NOS                                        |
| 26553  | 62ND.00 | A/N 38 week examination                                      |
| 102160 | L283200 | Prolonged artificial rupture of membranes with a/n problem   |
| 64141  | 62K2.00 | A/N syphilis screen-blood sent                               |
| 26550  | 62A2.00 | A/N care from consultant                                     |
| 89025  | L237200 | Other fetal abnormality causing disproportion with a/n prob  |
| 102099 | 62MZ.00 | A/N sickle cell screen NOS                                   |
| 47415  | 62G5.00 | A/N U/S scan awaited                                         |
| 13415  | 62A4.00 | A/N care midwifery led                                       |
| 54734  | L28z200 | Amniotic cavity and membrane problem NOS with a/n problem    |
| 14086  | 62G8.00 | A/N U/S scan abnormal                                        |
| 37221  | 62G7.00 | A/N U/S scan normal +? dates                                 |
| 66608  | L241300 | Tumour of uterine body complicating a/n care, baby not deliv |
| 71797  | L248300 | Vulval abn complicating a/n care - baby not yet delivered    |
| 37029  | 62NG.00 | A/N 41 week examination                                      |
| 29727  | 62NA.00 | A/N 35 week examination                                      |
| 108885 | 62L1.00 | A/N blood gp screen not done                                 |
| 39172  | 62L2.00 | A/N blood group screen done                                  |
| 38165  | 6237    | A/N care: H/O trophoblast.dis.                               |
| 35511  | 6234    | A/N care: H/O stillbirth                                     |
| 26875  | 6232    | A/N care: recurrent aborter                                  |
| 9546   | 623..00 | A/N care: obstetric risk                                     |
| 73120  | L247300 | Vaginal abnormality complicating a/n care-baby not delivered |
| 24214  | 62A1.00 | A/N care from G.P.                                           |
| 13169  | 62N5.00 | A/N 24 week examination                                      |
| 29627  | 62N7.00 | A/N 30 week examination                                      |
| 3517   | 62N1.00 | A/N booking examination                                      |
| 62147  | 62F8.00 | A/N amnio. for ? chrom.abnorm.                               |
| 37047  | 6242    | A/N care: H/O infertility                                    |
| 27057  | 62G9.00 | A/N U/S scan for ? abnormality                               |
| 70616  | 62M2.00 | A/N sickle cell screen done                                  |
| 29059  | 62A3.00 | A/N - shared care                                            |
| 108867 | 62M1.00 | A/N sickle screen not done                                   |



|        |         |                                                              |
|--------|---------|--------------------------------------------------------------|
| 12260  | 62H..00 | A/N Rh antibody screen                                       |
| 41955  | 62F5.00 | A/N amniocentesis - awaited                                  |
| 13166  | 62N3.00 | A/N 16 week examination                                      |
| 35510  | 6241    | A/N care: elderly primip.                                    |
| 26552  | 62NC.00 | A/N 37 week examination                                      |
| 29280  | 62NF.00 | A/N 40 week examination                                      |
| 3786   | 628..00 | A/N care: risk NOS                                           |
| 39728  | 62O..11 | Fetal maturity - A/N                                         |
| 13822  | 62F7.00 | A/N amniocentesis - abnormal                                 |
| 71912  | 62H1.00 | A/N Rh screen not offered                                    |
| 26694  | 6251    | A/N care: poor home conditions                               |
| 70186  | 62LZ.00 | A/N blood group screen NOS                                   |
| 26690  | 623Z.00 | A/N care: obstetric risk NOS                                 |
| 98957  | L240300 | Cong abnorm uterus complicating a/n care, baby not delivered |
| 13170  | 62N9.00 | A/N 34 week examination                                      |
| 109166 | 62K1.00 | A/N syphilis screen not done                                 |
| 13167  | 62N2.00 | A/N 12 weeks examination                                     |
| 37220  | 62G2.00 | A/N U/S scan offered                                         |
| 29364  | 62N4.00 | A/N 20 week examination                                      |
| 26554  | 62N6.00 | A/N 28 week examination                                      |
| 31250  | 6283    | A/N care: primip. < 17 years                                 |
| 30209  | ZV27000 | [V]Single live birth                                         |
| 20573  | Q48D000 | [X]Fresh stillbirth                                          |
| 11966  | ZV27.11 | [V]Live birth                                                |
| 8906   | ZV27.12 | [V]Stillbirth                                                |
| 41253  | 7F...11 | Childbirth operations                                        |
| 10719  | 6331    | Single live birth                                            |
| 28726  | 7F19100 | Water birth delivery                                         |
| 58978  | Q20y.00 | Other specified birth trauma                                 |
| 37884  | Z254D00 | Face to pubes birth                                          |
| 72025  | ZV3zz00 | [V]Unspecified birth, NOS                                    |
| 8776   | Q48D.00 | [X] Stillbirth                                               |
| 5253   | 633a.00 | Birth of child                                               |
| 31203  | 6332    | Single stillbirth                                            |
| 13287  | 633..11 | Livebirth                                                    |
| 17354  | 633..13 | Triplet birth                                                |
| 1825   | 633..14 | Twin birth                                                   |
| 1214   | 6311    | Home birth                                                   |
| 2353   | 63E2.00 | Normal birth                                                 |
| 974    | Q4z..15 | Stillbirth NEC                                               |
| 110211 | 633C.00 | Intrapartum stillbirth                                       |
| 70813  | ZV27500 | [V]Other multiple birth, all live born                       |
| 37878  | Z254E11 | Multiple birth delivery                                      |
| 42324  | L34z.00 | Vulval/perineal trauma during delivery NOS                   |
| 55124  | L39yz00 | Other complications of labour and delivery NOS               |

|        |         |                                                              |
|--------|---------|--------------------------------------------------------------|
| 27351  | Q036.00 | Fetus or neonate affected by precipitate delivery            |
| 43918  | L340400 | Fourchette tear during delivery                              |
| 33915  | L213.00 | Multiple delivery                                            |
| 5213   | 7F16400 | Low forceps cephalic delivery                                |
| 25223  | L396.00 | Vacuum extractor delivery                                    |
| 57957  | 7F1Ay00 | Other specified other method of delivery                     |
| 7670   | L398z00 | Caesarean delivery NOS                                       |
| 24243  | L263400 | Labour and delivery complic by meconium in amniotic fluid    |
| 15828  | 14Y4.00 | Born by breech delivery                                      |
| 69780  | Lyu5100 | [X]Other and unspecified forceps delivery                    |
| 62862  | L342200 | Third degree perineal tear during delivery with p/n problem  |
| 68752  | Z253300 | Normal rate of delivery                                      |
| 33773  | 7F19y00 | Other specified normal delivery                              |
| 30775  | 62B8.00 | Midwife unit delivery booking                                |
| 6452   | L395.00 | Forceps delivery                                             |
| 239    | L20..11 | Spontaneous vaginal delivery                                 |
| 95858  | L34y100 | Other vulval/perineal trauma during delivery- delivered      |
| 29070  | 7F15000 | Spontaneous breech delivery                                  |
| 19605  | L341z00 | Second degree perineal tear during delivery NOS              |
| 57945  | 7F17200 | Vacuum delivery before full dilation of cervix               |
| 72022  | L343000 | Fourth degree perineal tear during delivery, unspecified     |
| 19607  | L344000 | Unspecified perineal laceration during delivery, unspecified |
| 3365   | L142.11 | Premature delivery                                           |
| 27914  | 62V..00 | Delivery place planned                                       |
| 90885  | Lyu4900 | [X]Labour+delivery complicated by other cord entanglement    |
| 56310  | Z25..00 | Delivery observations                                        |
| 12052  | Z257.00 | Delivery normal                                              |
| 11532  | 7F14.00 | Breech extraction delivery                                   |
| 13164  | 62BZ.00 | Delivery booking - place NOS                                 |
| 61212  | L34y.00 | Other vulval and perineal trauma during delivery             |
| 61077  | 7F16200 | Mid forceps cephalic delivery with rotation                  |
| 5866   | 7F1..00 | Induction and delivery operations                            |
| 65940  | 7F16500 | Trial of forceps delivery                                    |
| 19608  | L340z00 | First degree perineal tear during delivery NOS               |
| 52875  | L398000 | Caesarean delivery unspecified                               |
| 83535  | Lyu5000 | [X]Other single spontaneous delivery                         |
| 47625  | Z22C200 | Estimated date of delivery from last normal period           |
| 17744  | 7F13100 | Lower uterine segment caesarean delivery NEC                 |
| 15073  | 7F13y00 | Other specified other caesarean delivery                     |
| 9800   | L398300 | Delivery by elective caesarean section                       |
| 37699  | L396z00 | Vacuum extractor delivery NOS                                |
| 72021  | L343100 | Fourth degree perineal tear during delivery - delivered      |
| 107136 | Q031.11 | Fetus affected by malpresentation during delivery            |
| 17684  | L395.11 | Keilland's forceps delivery                                  |
| 20425  | L395.12 | Neville - Barnes forceps delivery                            |

|        |         |                                                             |
|--------|---------|-------------------------------------------------------------|
| 4780   | L20..00 | Normal delivery in a completely normal case                 |
| 5868   | Ly0..00 | Spontaneous vertex delivery                                 |
| 106113 | Lyu5800 | [X]Multiple delivery, unspecified                           |
| 62406  | L323000 | Delayed delivery second twin unspecified                    |
| 61540  | Z212100 | Delivery place planned                                      |
| 47157  | L34zz00 | Vulval/perineal trauma during delivery NOS                  |
| 58176  | 62C2.00 | Full stay delivery booking                                  |
| 32283  | Z212200 | Home delivery planned                                       |
| 106808 | L34z200 | Vulval/perineal trauma during delivery NOS with p/n problem |
| 740    | 7F12.00 | Elective caesarean delivery                                 |
| 111579 | Z263300 | Condition of membranes at delivery                          |
| 34102  | Z262700 | Incomplete placenta at delivery                             |
| 21554  | 7F16900 | Kielland forceps cephalic delivery with rotation            |
| 31254  | L340100 | First degree perineal tear during delivery - delivered      |
| 23394  | 7F16300 | Mid forceps cephalic delivery NEC                           |
| 54591  | 7F14z00 | Breech extraction delivery NOS                              |
| 3085   | 7F12z00 | Elective caesarean delivery NOS                             |
| 22491  | Ly1..00 | Spontaneous breech delivery                                 |
| 19609  | L340600 | Vaginal tear during delivery                                |
| 39168  | L342100 | Third degree perineal tear during delivery - delivered      |
| 44235  | L296.00 | Vaginal delivery following previous caesarean section       |
| 40706  | L344z00 | Unspecified perineal laceration during delivery NOS         |
| 27993  | 62V0.00 | Home delivery planned                                       |
| 58721  | L20z.00 | Normal delivery in completely normal case NOS               |
| 33477  | L398100 | Caesarean delivery - delivered                              |
| 27963  | L323.00 | Delayed delivery of second twin, triplet etc                |
| 37509  | 7F1A300 | Drainage of hydrocephalus of fetus to facilitate delivery   |
| 30806  | L34yz00 | Other vulval/perineal trauma during delivery NOS            |
| 30373  | Z22C100 | Estimated date of delivery from last period                 |
| 42572  | L323100 | Delayed delivery second twin - delivered                    |
| 15514  | 7F13000 | Upper uterine segment caesarean delivery NEC                |
| 47546  | 7F12y00 | Other specified elective caesarean delivery                 |
| 86399  | 7F17y00 | Other specified vacuum delivery                             |
| 13352  | L34..00 | Trauma to perineum and vulva during delivery                |
| 49446  | L396100 | Vacuum extractor delivery - delivered                       |
| 15256  | L344.00 | Unspecified perineal laceration during delivery             |
| 37054  | L341100 | Second degree perineal tear during delivery - delivered     |
| 3108   | 7F1B000 | Episiotomy to facilitate delivery                           |
| 47863  | Lyu5200 | [X]Other single delivery by caesarean section               |
| 9160   | Z257100 | Spontaneous vertex delivery                                 |
| 58844  | L396000 | Vacuum extractor delivery unspecified                       |
| 57488  | L34z100 | Vulval/perineal trauma during delivery NOS - delivered      |
| 27731  | L345.12 | Vulval and perineal haematoma during delivery               |
| 104872 | L143100 | Premature labour with premature delivery                    |
| 42275  | L395300 | Mid-cavity forceps delivery                                 |

|       |         |                                                              |
|-------|---------|--------------------------------------------------------------|
| 40876 | L342z00 | Third degree perineal tear during delivery NOS               |
| 93273 | L39z100 | Complications of labour and delivery NOS - delivered         |
| 42755 | L387.00 | Spinal/epidural anesth-induced headache dur labour/delivery  |
| 57789 | L395400 | Delivery by combination of forceps and vacuum extractor      |
| 19603 | L340000 | First degree perineal tear during delivery, unspecified      |
| 4786  | L213200 | Multiple delivery, all by caesarean section                  |
| 20002 | 7F16000 | High forceps cephalic delivery with rotation                 |
| 66501 | L39z00  | Complications of labour and delivery NOS                     |
| 34333 | Z262711 | Incomplete delivery of placenta                              |
| 19602 | L341000 | Second degree perineal tear during delivery, unspecified     |
| 39866 | 7F1A200 | Cleidotomy of fetus to facilitate delivery                   |
| 30805 | L34y000 | Other vulval/perineal trauma during delivery, unspecified    |
| 11530 | Z254900 | Vaginal delivery                                             |
| 67489 | L34z000 | Vulval/perineal trauma during delivery NOS unspec            |
| 4638  | 7F13.00 | Other caesarean delivery                                     |
| 40744 | Z254A00 | Abnormal delivery                                            |
| 25157 | L142100 | Early onset of delivery - delivered                          |
| 17704 | L395.13 | Simpson's forceps delivery                                   |
| 39573 | Z265900 | Umbilical cord not around baby's neck at delivery            |
| 5033  | 7F16100 | High forceps cephalic delivery NEC                           |
| 26549 | 62B1.00 | Delivery: no place booked                                    |
| 50293 | 7F1z.00 | Induction and delivery operations NOS                        |
| 67862 | L39..00 | Other complications of labour and delivery NEC               |
| 63277 | L393.00 | Acute renal failure following labour and delivery            |
| 32380 | L34..12 | Vulval delivery trauma                                       |
| 23866 | 7F1B100 | Symphiotomy to facilitate delivery                           |
| 618   | L398400 | Delivery by emergency caesarean section                      |
| 66315 | Lyu5500 | [X]Other specified assisted single delivery                  |
| 23791 | L38A.00 | Failed or difficult intubation during labour and delivery    |
| 99608 | 7F1Bz00 | Other operation to facilitate delivery NOS                   |
| 98749 | 7F1B400 | Incision of cervix to facilitate delivery                    |
| 30274 | L395200 | Low forceps delivery                                         |
| 35190 | 7F13z00 | Other caesarean delivery NOS                                 |
| 40710 | L395z00 | Forceps delivery NOS                                         |
| 26712 | L340300 | Labial tear during delivery                                  |
| 62789 | Q031.00 | Fetus/neonate affected by malposition/disproportion-delivery |
| 2624  | Q033.00 | Fetus or neonate affected by vacuum extraction delivery      |
| 19599 | L340.00 | First degree perineal tear during delivery                   |
| 11650 | L342.00 | Third degree perineal tear during delivery                   |
| 51736 | 7F17100 | Low vacuum delivery                                          |
| 36703 | L345.00 | Vulval and perineal haematoma during delivery                |
| 2458  | 7F17.00 | Vacuum delivery                                              |
| 22975 | 62B3.00 | G.P. unit delivery booking                                   |
| 32988 | 62B5.00 | Private home delivery booking                                |
| 49485 | L263600 | Labour+delivery complicatd by biochem evidence/fetal stress  |

|        |         |                                                             |
|--------|---------|-------------------------------------------------------------|
| 5522   | L3z..00 | Complications of labour and delivery NOS                    |
| 103319 | Lyu4.00 | [X]Complications of labour and delivery                     |
| 14789  | Q030.11 | Fetus affected by breech delivery                           |
| 34411  | Z254300 | Delivered by mid-cavity forceps delivery                    |
| 48230  | Z254800 | Deliveries by spontaneous breech delivery                   |
| 36137  | L142z00 | Early onset of delivery NOS                                 |
| 59941  | L142000 | Early onset of delivery unspecified                         |
| 20738  | 7F19000 | Manually assisted vaginal delivery                          |
| 34628  | 7F16600 | Failed forceps delivery                                     |
| 33480  | 7F16y00 | Other specified forceps cephalic delivery                   |
| 37245  | L345000 | Vulval and perineal haematoma during delivery, unspecified  |
| 43959  | 633Z.00 | Outcome of delivery NOS                                     |
| 70615  | L345z00 | Vulval and perineal haematoma during delivery NOS           |
| 60953  | Z253211 | Precipitate delivery                                        |
| 53572  | L3y..00 | Other specified complications of labour or delivery         |
| 9668   | 7F12100 | Elective lower uterine segment caesarean delivery           |
| 9791   | Z257.15 | ND - Normal delivery                                        |
| 9625   | L263300 | Labour and delivery complicated by fetal heart rate anomaly |
| 28861  | L398500 | Delivery by caesarean hysterectomy                          |
| 49733  | L388.00 | Cardiac comps of anaesthesia during labour and delivery     |
| 15480  | 14Y3.00 | Born by normal vaginal delivery                             |
| 98059  | Lyu5400 | [X]Other manipulation-assisted delivery                     |
| 69971  | Z253100 | Slow rate of delivery                                       |
| 61226  | ZV27y00 | [V]Other specified outcome of delivery                      |
| 105276 | 7F14000 | Breech extraction delivery with version                     |
| 103890 | 1514000 | Estimated date of delivery from last period                 |
| 101229 | Z255A00 | Observation of delivery push in labour                      |
| 50675  | L395100 | Forceps delivery - delivered                                |
| 44472  | L39y.00 | Other complications of labour and delivery                  |
| 48742  | Z254C00 | Face delivery                                               |
| 33884  | L213000 | Multiple delivery, all spontaneous                          |
| 14892  | 7F17z00 | Vacuum delivery NOS                                         |
| 64464  | 7F15z00 | Other breech delivery NOS                                   |
| 13163  | 62B..00 | Delivery booking place                                      |
| 105419 | 7F17000 | High vacuum delivery                                        |
| 8879   | 1514.12 | Estimated date of delivery                                  |
| 720    | L398.00 | Caesarean delivery                                          |
| 29885  | L3...00 | Complications occurring during labour and delivery          |
| 14727  | 14Y1.00 | Born by forceps delivery                                    |
| 15675  | 14Y5.00 | Born by ventouse delivery                                   |
| 167    | 7F19.00 | Normal delivery                                             |
| 32991  | 62C1.00 | Short stay delivery booking                                 |
| 688    | 7F17.11 | Ventouse delivery                                           |
| 463    | L222.12 | Breech delivery                                             |
| 6141   | L396.11 | Ventouse delivery                                           |

|        |         |                                                             |
|--------|---------|-------------------------------------------------------------|
| 28903  | Z254200 | Delivered by low forceps delivery                           |
| 100597 | L39y100 | Other complications of labour and delivery - delivered      |
| 12014  | ZV27.00 | [V]Outcome of delivery                                      |
| 61259  | 7F12000 | Elective upper uterine segment caesarean delivery           |
| 105032 | L143000 | Premature labour without delivery                           |
| 42885  | Z254.00 | Observation of pattern of delivery                          |
| 107557 | 63D7.00 | Complete placenta at delivery                               |
| 37254  | Q030.00 | Fetus or neonate affected by breech delivery and extraction |
| 3078   | Q032.00 | Fetus or neonate affected by forceps delivery               |
| 19600  | L341.00 | Second degree perineal tear during delivery                 |
| 39576  | L343.00 | Fourth degree perineal tear during delivery                 |
| 31280  | L340500 | Vulval tear during delivery                                 |
| 25545  | Z212300 | Delivery place booked                                       |
| 70242  | 7F16700 | Barton forceps cephalic delivery with rotation              |
| 71057  | L345100 | Vulval and perineal haematoma during delivery - delivered   |
| 1279   | 7F16.00 | Forceps cephalic delivery                                   |
| 22976  | 62B2.00 | Home delivery booked                                        |
| 41414  | 62B6.00 | Delivery booking place changed                              |
| 104873 | L143.00 | Premature labour and delivery                               |
| 50847  | L398600 | Caesarean delivery following previous Caesarean delivery    |
| 18287  | 7F22500 | Normal delivery of placenta                                 |
| 19604  | L342000 | Third degree perineal tear during delivery, unspecified     |
| 2943   | L222.11 | Assisted breech delivery                                    |
| 96089  | Z253200 | Rapid rate of delivery                                      |
| 8967   | 7F19z00 | Normal delivery NOS                                         |
| 51065  | 62CZ.00 | Delivery booking - stay NOS                                 |
| 33378  | 7F15.00 | Other breech delivery                                       |
| 53937  | L395000 | Forceps delivery unspecified                                |
| 90497  | L39z400 | Complications of labour and delivery NOS with p/n problem   |
| 23994  | 7F15100 | Assisted breech delivery                                    |
| 60256  | Z254B00 | Brow delivery                                               |
| 60538  | L213100 | Multiple delivery, all by forceps and vacuum extractor      |
| 15926  | 7F15y00 | Other specified other breech delivery                       |
| 95780  | Z262600 | Complete placenta at delivery                               |
| 65702  | L38..00 | Complications of anaesthesia during labour and delivery     |
| 14686  | 7F16z00 | Forceps cephalic delivery NOS                               |
| 67052  | L344100 | Unspecified perineal laceration during delivery - delivered |
| 15167  | L142.00 | Early onset of delivery                                     |
| 11194  | Z257.12 | Spontaneous vaginal delivery                                |
| 25681  | Z257.13 | SVD - Spontaneous vaginal delivery                          |
| 9383   | Z257.11 | Normal delivery                                             |
| 17492  | Z257.14 | FTND - Full term normal delivery                            |
| 31780  | L222.13 | Spontaneous breech delivery                                 |
| 22498  | Z253.12 | Rate of delivery                                            |
| 52151  | Lyu4800 | [X]Labour+delivery complicat/oth evidence of fetal distress |

|        |         |                                                              |
|--------|---------|--------------------------------------------------------------|
| 39319  | 8HE7.00 | Discharged from hospital within 6 hours of delivery          |
| 73048  | 7F14y00 | Other specified breech extraction delivery                   |
| 109452 | 7F1By00 | Other specified other operation to facilitate delivery       |
| 69920  | L39z.00 | Complications of labour and delivery NOS                     |
| 57652  | L343z00 | Fourth degree perineal tear during delivery NOS              |
| 53100  | 7F20z00 | Instrumental removal products of concep delivered uterus NOS |
| 41494  | 7F21z00 | Manual removal products of conception delivered uterus NOS   |
| 27800  | L124300 | Mild or unspecified pre-eclampsia - not delivered            |
| 41588  | L112200 | Placental abruption - not delivered                          |
| 3364   | L126300 | Eclampsia - not delivered                                    |
| 65759  | L244300 | Other uterine/pelvic floor abnormal - baby not yet delivered |
| 62880  | L110200 | Placenta praevia without haemorrhage - not delivered         |
| 69002  | L11y200 | Other antepartum haemorrhage - not delivered                 |
| 67447  | L125300 | Severe pre-eclampsia - not delivered                         |
| 64752  | L111200 | Placenta praevia with haemorrhage - not delivered            |
| 53160  | L127300 | Pre-eclampsia or eclampsia with hypertension - not delivered |
| 31617  | L130200 | Mild hyperemesis-not delivered                               |
| 57852  | L100200 | Threatened abortion - not delivered                          |
| 64298  | L141100 | Other threatened labour - not delivered                      |
| 54082  | L169300 | Herpes gestationis - not delivered                           |
| 48830  | L140100 | Threatened premature labour - not delivered                  |
| 54576  | Z252.00 | Mother not delivered                                         |
| 2549   | L222.00 | Breech presentation                                          |
| 13288  | 2722    | O/E - breech presentation                                    |
| 46298  | L222z00 | Breech presentation NOS                                      |
| 55359  | Q017100 | Fetus/neonate affected by breech presentation before labour  |
| 56867  | L300300 | Obstructed labour due to breech presentation                 |
| 66786  | L397z00 | Breech extraction NOS                                        |
| 48516  | Z254400 | Deliveries by breech extraction                              |
| 4955   | L397.00 | Breech extraction                                            |
| 66106  | L397000 | Breech extraction unspecified                                |
| 15610  | 7F06300 | External version of breech                                   |
| 1534   | 7F14100 | Forceps to aftercoming head (breech)                         |
| 66307  | L222000 | Breech presentation unspecified                              |
| 16097  | Q214z00 | Liveborn with unspecified fetal distress NOS                 |
| 33258  | L512.00 | Maternal care for diminished fetal movements                 |
| 67883  | L514.00 | Maternal care for poor fetal growth                          |
| 50733  | L263.12 | Fetal bradycardia                                            |
| 23009  | Q213.11 | Fetal distress in labour - liveborn                          |
| 48463  | Q410.00 | Fetal blood loss                                             |
| 23565  | L25..00 | Known or suspected fetal abnormality                         |
| 43428  | ZV28400 | [V]Screening for fetal growth retardation using ultrasonics  |
| 5479   | Q212.00 | Liveborn with prelabour fetal distress                       |
| 106201 | Qyu5400 | [X]Other specified fetal and neonatal haemorrhages           |
| 31481  | 7F04300 | Electrode applied to fetal scalp                             |

|        |         |                                                              |
|--------|---------|--------------------------------------------------------------|
| 107512 | Q102.11 | Fetal malnutrition without mention of 'light for dates'      |
| 96711  | Q408200 | Escherichia coli intra-amniotic fetal infection              |
| 98261  | 7F27y00 | OS non routine obstetric scan for fetal observations         |
| 43893  | Q470.00 | Idiopathic hydrops fetalis                                   |
| 19590  | 62O1.00 | Fetal movements felt                                         |
| 48576  | L22y.00 | Other fetal malposition and malpresentation                  |
| 64959  | 7F01100 | Fetoscopic examination of fetus and sampling of fetal blood  |
| 36640  | L265300 | Maternal care for poor fetal growth                          |
| 59566  | Q41yz00 | Fetal or newborn haemorrhage NOS                             |
| 72837  | 2763    | O/E - fetal heart 40-80                                      |
| 62654  | 4H72.00 | Amniotic fetal cell abnormal                                 |
| 28977  | L237.00 | Other fetal abnormality causing disproportion                |
| 46514  | L263700 | Maternal care for fetal hypoxia                              |
| 60301  | 7P0H500 | Fetal echocardiography                                       |
| 27801  | 2755    | O/E - fetal movemnt.diminished                               |
| 67438  | Q40y000 | Intrauterine fetal sepsis, unspecified                       |
| 63905  | Lyu3A00 | [X]Maternal care/known or suspected fetal problem,unspecifd  |
| 46784  | Q023200 | Fetus/neonate affected by materno-fetal transplacental trans |
| 50281  | Q213z00 | Liveborn with labour fetal distress NOS                      |
| 25153  | 2753    | O/E - fetal movements felt                                   |
| 103893 | 7F27400 | Fetal ascites scan                                           |
| 66619  | Q023011 | Fetus/neonate affected by feto-fetal transplacental transfus |
| 101225 | BBK3400 | [M]Fetal rhabdomyoma                                         |
| 104765 | Q102.00 | Fetal malnutrition, no mention light or small for gest age   |
| 96669  | L22z.00 | Fetal malposition and malpresentation NOS                    |
| 55071  | Z271C00 | Fetal heart baseline pattern                                 |
| 22815  | 275..00 | O/E - fetal movements                                        |
| 69819  | 274Z.00 | O/E - fetal station NOS                                      |
| 56744  | Q10..11 | Fetal malnutrition                                           |
| 9164   | 584..11 | Fetal U-S scan                                               |
| 66175  | Q45z.00 | Fetal or newborn blood disorder NOS                          |
| 102019 | Q410600 | Fetal haemorrhage into mother's circulation                  |
| 104829 | L260000 | Fetal-maternal haemorrhage unspecified                       |
| 97471  | Q212z00 | Liveborn with prelabour fetal distress NOS                   |
| 100323 | 4H7..00 | Amniotic fetal cell study                                    |
| 73393  | 4H71.00 | Amniotic fetal cell study: NAD                               |
| 53296  | 42YG.00 | Fetal cell test                                              |
| 48798  | Q45..00 | Fetal and newborn blood disorders                            |
| 21893  | L510.00 | Maternal care for hydrops fetalis                            |
| 60774  | Z271100 | Fetal heart acceleration                                     |
| 62898  | 2768    | O/E - fetal heart 180-200                                    |
| 95881  | 2762    | O/E - fetal heart < 40                                       |
| 70856  | 2764    | O/E - fetal heart 80-100                                     |
| 67186  | 272Z.00 | O/E - fetal presentation NOS                                 |
| 38608  | L250.11 | Suspect fetal anencephaly                                    |



|        |         |                                                             |
|--------|---------|-------------------------------------------------------------|
| 8846   | L250.13 | Suspect fetal spina bifida                                  |
| 55152  | Q408.00 | Intra-amniotic fetal infection                              |
| 104218 | L300000 | Obstructed labour due to fetal malposition unspecified      |
| 99494  | Q455000 | Congenital anaemia from fetal blood loss                    |
| 91908  | 7F27200 | Fetal biometry                                              |
| 95754  | Q408z00 | Intra-amniotic fetal infection NOS                          |
| 62629  | Q41yy00 | Other specified fetal or newborn haemorrhage                |
| 95064  | Q41y.00 | Other fetal and newborn haemorrhage                         |
| 19575  | Q10z.00 | Fetal growth retardation NOS                                |
| 31033  | 7F03100 | Percutaneous insertion of fetal pleuroamniotic shunt        |
| 53241  | Q214100 | Liveborn with fetal hypoxia, unspecified                    |
| 26707  | 2766    | O/E - fetal heart 120-160                                   |
| 38846  | Z271D00 | Normal fetal heart baseline pattern                         |
| 44071  | Q479.00 | Non-immune hydrops fetalis                                  |
| 64335  | L263000 | Fetal distress unspecified                                  |
| 23590  | L300.00 | Obstructed labour due to fetal malposition                  |
| 102073 | Q410z00 | Fetal blood loss NOS                                        |
| 53687  | 2752    | O/E - fetal movements seen                                  |
| 42093  | 5846    | U-S scan - fetal maturity                                   |
| 3620   | Q214.00 | Liveborn with fetal distress, unspecified                   |
| 63024  | 2726    | O/E -fetal presentation unsure                              |
| 104845 | Q410700 | Fetal exsanguination                                        |
| 59679  | 276Z.00 | O/E - fetal heart NOS                                       |
| 100297 | L22zz00 | Fetal malposition and malpresentation NOS                   |
| 34777  | Q10..00 | Slow fetal growth and fetal malnutrition                    |
| 98499  | L25z300 | Maternal care for suspect fetal abnormal and damage, unspec |
| 96222  | L25z400 | Maternal care for fetal abnormality and damage, unspecified |
| 41908  | Q3z..00 | Fetal or newborn respiratory problems NOS                   |
| 28184  | Q436z00 | Unspecified fetal or neonatal jaundice NOS                  |
| 11589  | 7F25100 | Fetal heart monitoring in labour                            |
| 35680  | Q423.00 | Hydrops fetalis due to isoimmunisation                      |
| 45439  | Lyu3900 | [X]Maternal care/oth spcf known or suspected fetal problems |
| 12013  | L268000 | Reduced fetal movements                                     |
| 19581  | Q436.00 | Fetal and neonatal jaundice, unspecified                    |
| 32184  | L267500 | Other fetal problems                                        |
| 68996  | 2765    | O/E - fetal heart 100-120                                   |
| 62903  | 2767    | O/E - fetal heart 160-180                                   |
| 70845  | Z271E00 | Sinusoidal pattern of fetal heart                           |
| 52308  | Q211.00 | Fetal death due to labour anoxia                            |
| 101119 | 2769    | O/E - fetal heart > 200                                     |
| 27868  | 2761    | O/E - fetal heart not heard                                 |
| 39218  | 5858200 | Ultrasonic doppler for fetal heart sounds                   |
| 2437   | 2751    | O/E - no fetal movements                                    |
| 13276  | L263.00 | Fetal distress - affecting management                       |
| 49294  | L26..00 | Other fetal and placental problems                          |

|        |         |                                                             |
|--------|---------|-------------------------------------------------------------|
| 41919  | 5849    | U-S scan - fetal presentation                               |
| 72159  | 5845    | U-S scan - fetal cephalometry                               |
| 91933  | Q410000 | Fetal blood loss, unspecified                               |
| 85992  | 7F27.00 | Non routine obstetric scan for fetal observations           |
| 95538  | Z271B00 | Poor baseline variability in fetal heart rate               |
| 36195  | L268.00 | Other fetal problems                                        |
| 8147   | L264.11 | Fetal death in utero                                        |
| 94785  | 9Nk3.00 | Seen in fetal medicine clinic                               |
| 91477  | 7F03300 | Percutaneous insertion of fetal pleural drain               |
| 19720  | 7F25.11 | Fetal monitoring                                            |
| 983    | Q....11 | Fetal and neonatal conditions                               |
| 26710  | 272..00 | O/E - fetal presentation                                    |
| 45963  | 5847    | U-S scan - fetal abnormality                                |
| 46413  | L250.12 | Suspect fetal hydrocephaly                                  |
| 48801  | Q41..00 | Fetal and neonatal haemorrhage                              |
| 95875  | 7F27z00 | Non routine obstetric scan for fetal observations NOS       |
| 39868  | Q420.11 | Erythroblastosis fetalis                                    |
| 50201  | Q31..00 | Other fetal and newborn respiratory conditions              |
| 55607  | Z271900 | Fetal heart rate variability                                |
| 47149  | Z271F00 | Fetal heart deceleration                                    |
| 102894 | L260z00 | Fetal-maternal haemorrhage NOS                              |
| 91773  | Z271A00 | Good baseline variability in fetal heart rate               |
| 46502  | Q21..12 | Labour fetal anoxia                                         |
| 46431  | 7F04100 | Percutaneous sampling of fetal blood                        |
| 9501   | 7F25000 | Fetal heart monitoring NEC                                  |
| 19582  | Q493.00 | Persistent fetal circulation                                |
| 7681   | 276..00 | O/E - fetal heart heard                                     |
| 62316  | L51..00 | Maternal care for other known or suspected fetal problems   |
| 53420  | L263.13 | Fetal tachycardia                                           |
| 54004  | 7F03000 | Percutaneous insertion of fetal vesicoamniotic shunt        |
| 34132  | Q212.11 | Fetal distress before labour - liveborn                     |
| 42322  | Q213.00 | Liveborn with labour fetal distress                         |
| 20320  | Q210.00 | Fetal death due to prelabour anoxia                         |
| 107794 | 4H7Z.00 | Amniotic fetal cell study NOS                               |
| 106136 | Q410200 | Fetal placental blood loss                                  |
| 66335  | L260.00 | Fetal-maternal haemorrhage                                  |
| 53863  | L263z00 | Fetal distress NOS                                          |
| 41102  | L263500 | Lab+del comp fetal ht rate anom wth meconium in amnio fluid |
| 35214  | Z271912 | FHRV - Fetal heart rate variability                         |
| 26401  | Q214.11 | Fetal distress, unspecified when, liveborn                  |
| 54687  | L51X.00 | Maternal care/known or suspected fetal problem,unspecifd    |
| 37752  | 6203.00 | Fetal maturity: dates = size                                |
| 55493  | 6202.00 | Fetal movements seen                                        |
| 52857  | 275Z.00 | O/E - fetal movements NOS                                   |
| 110134 | Z271G00 | Early fetal heart deceleration                              |

|        |         |                                                              |
|--------|---------|--------------------------------------------------------------|
| 13299  | Q42X.00 | Hydrops fetalis due to other+unspcfd haemolytic disease      |
| 100342 | PK81.00 | Fetal hydantoin syndrome                                     |
| 50913  | P7z..11 | Fetal circulation                                            |
| 51372  | Q311z11 | Pneumonitis due to fetal aspiration                          |
| 97985  | Z271H00 | Late fetal heart deceleration                                |
| 95649  | L263.11 | Fetal acidosis                                               |
| 48784  | 62O4.00 | Fetal maturity: dates not=size                               |
| 66428  | Q026.11 | Fetus affected by cord problems                              |
| 1017   | Q034.00 | Fetus or neonate affected by caesarean section               |
| 97885  | 7F01000 | Fetoscopic examination of fetus and biopsy of fetus          |
| 47151  | L220.00 | Fetus - unstable lie                                         |
| 97186  | 7F03z00 | Therapeutic percutaneous operation on fetus NOS              |
| 26685  | Q035600 | Fetus/neonate affected by other maternal opiates in lab/del  |
| 62776  | Q037.11 | Fetus or neonate affected by hypertonic labour               |
| 5538   | Q024.00 | Fetus or neonate affected by prolapsed cord                  |
| 91659  | Q022.00 | Fetus/neonate affected by placental abnormality NEC          |
| 105625 | Q027.00 | Fetus or neonate affected by chorioamnionitis                |
| 72118  | L257.00 | Fetus with damage due to intra-uterine contraceptive device  |
| 52007  | L255.00 | Fetus with drug damage                                       |
| 73892  | Q00z.00 | Fetus or neonate affected by maternal medical problem NOS    |
| 67326  | Q04X.00 | Fetus+newborn affected/other maternal noxious influences     |
| 69257  | L25y000 | Fetus with other damage NEC, unspecified                     |
| 71987  | Q007A00 | Fetus/neonate affect-plac./breast transf hypoglycaemic agent |
| 63290  | Q101.00 | Fetus small-for-dates with signs of malnutrition             |
| 52669  | Q031200 | Fetus/neonate affect persistent occip-posterior - labour/del |
| 61063  | L25zz00 | Fetus with damage NOS                                        |
| 99136  | Q021200 | Fetus/neonate affected by placental damage-amniocentesis     |
| 45440  | 7F00.00 | Therapeutic fetoscopic operations on fetus                   |
| 30979  | 7N61200 | [SO]Fetus                                                    |
| 69435  | 7F02z00 | Selective destruction of fetus NOS                           |
| 61452  | 7F0z.00 | Fetus and gravid uterus operations NOS                       |
| 46724  | Q022200 | Fetus or neonate affected by placental insufficiency         |
| 105097 | L250300 | Maternal care for suspected CNS malformation in fetus        |
| 52633  | Q021111 | Fetus affected by placental abruption                        |
| 36894  | Q100.11 | Fetus small-for-dates (SFD), without mention of malnutrition |
| 94808  | Q017600 | Fetus or neonate affected by face presentation before labour |
| 103741 | 7F2A211 | Doppler ultrasound scan of middle cerebral artery of fetus   |
| 51177  | L5...00 | Maternal care for fetus                                      |
| 106508 | 7F03600 | Percutaneous laser ablation of lesion of fetus               |
| 44173  | 5391    | Obstetric X-ray - fetus                                      |
| 38864  | L160.00 | Papyraceous fetus                                            |
| 48156  | Q025000 | Fetus or neonate affected by cord round neck                 |
| 59236  | L25z.00 | Fetus with damage NOS                                        |
| 53074  | L251z00 | Fetus with chromosomal abnormality NOS                       |
| 66699  | PK83.00 | Fetus and newborn affected by maternal use of alcohol        |

|        |         |                                                              |
|--------|---------|--------------------------------------------------------------|
| 66571  | Qyu5200 | [X]Oth intracranial(nontraumatic)haemorrhages/fetus+newborn  |
| 31923  | Q021300 | Fetus/neonate affected by placental damage-caesarean section |
| 72366  | 7F02y00 | Other specified selective destruction of fetus               |
| 62819  | 7F04z00 | Diagnostic percutaneous examination of fetus NOS             |
| 72973  | Qyu5500 | [X]Other haemolytic diseases of fetus and newborn            |
| 45653  | Q025.00 | Fetus or neonate affected by other cord compression          |
| 23483  | Q023.00 | Fetus or neonate affected by placental transfusion syndrome  |
| 97240  | Q027100 | Fetus or neonate affected by amnionitis                      |
| 72834  | Q41z.00 | Haemorrhage of fetus and newborn NOS                         |
| 52950  | Q013.00 | Fetus or neonate affected by maternal polyhydramnios         |
| 41937  | 5848    | U-S scan - multiple fetus                                    |
| 63077  | Q00y.00 | Fetus or neonate affected by other maternal condition        |
| 34695  | L22..11 | Malpresentation of fetus                                     |
| 15495  | Q42z.00 | Haemolytic disease of fetus/newborn due isoimmunisation NOS  |
| 22032  | Q100.00 | Fetus small-for-dates, without mention of malnutrition       |
| 43005  | Q200012 | Intracranial haemorrhage in fetus or newborn                 |
| 36559  | Q200011 | Intracerebral haemorrhage in fetus or newborn                |
| 71279  | L250000 | Fetus with central nervous system malformation unspecified   |
| 40870  | Q020.00 | Fetus or neonate affected by placenta previa                 |
| 85238  | Qyu5F00 | [X]Intracranial nontraumatic haemorrhage fetus newborn unsp  |
| 106959 | Qyu0200 | [X]Fetus and newborn affected by other maternal conditions   |
| 46283  | 7F0..00 | Fetus and gravid uterus operations                           |
| 682    | Q42..00 | Haemolytic disease of fetus/newborn due to isoimmunisation   |
| 27334  | Q026z00 | Fetus or neonate affected by cord problems NOS               |
| 50530  | 7F0y.00 | Other specified operations on fetus or gravid uterus         |
| 28487  | Q....13 | Fetus and neonate conditions                                 |
| 71910  | Q037200 | Fetus or neonate affected by hypertonic uterine dysfunction  |
| 70737  | L25z000 | Fetus with damage NOS, unspecified                           |
| 56697  | Q041.00 | Fetus and newborn affect by mat use of nutritional chem subs |
| 54726  | L251400 | Maternal care for chromosomal abnormality in fetus           |
| 101599 | L253300 | Maternal care for damage to fetus from maternal rubella      |
| 101893 | L251300 | Maternal care for suspected chromosomal abnormality in fetus |
| 66526  | Q035200 | Fetus/neonate affected by mat general anaesthesia - lab/del  |
| 99890  | Q021400 | Fetus/neonate affect by placental damage-surgical induction  |
| 44479  | Q200511 | Intracerebral haematoma in fetus or newborn                  |
| 47219  | Q035300 | Fetus/neonate affected by mat epidural anaesth - labour/del  |
| 52526  | Q200600 | Extradural haemorrhage in fetus or newborn                   |
| 105735 | Q007B00 | Fetus/neonate affected-plac./breast transfer endocrine agent |
| 21382  | 27B..00 | O/E - viable fetus                                           |
| 100241 | L25y.00 | Fetus with other damage NEC                                  |
| 26840  | Q017500 | Fetus or neonate affected by unstable lie before labour      |
| 95128  | 9d06.00 | Fetus                                                        |
| 26631  | Q000.00 | Fetus or neonate affected by maternal hypertensive disease   |
| 73317  | L252.00 | Fetus with hereditary disease                                |
| 48583  | Q031600 | Fetus/neonate affected by disproportion during labour/delive |

|        |         |                                                              |
|--------|---------|--------------------------------------------------------------|
| 71637  | Q017.11 | Fetus affected by malpresentation                            |
| 71495  | L250z00 | Fetus with central nervous system malformation NOS           |
| 60841  | Q013.11 | Fetus affected by hydramnios                                 |
| 55149  | Qyu0100 | [X]Fetus+newborn affectd/oth medical procedure on mother,NEC |
| 100666 | L252z00 | Fetus with hereditary disease NOS                            |
| 66748  | Qyu0C00 | [X]Fetus+newborn affected/other maternal noxious influences  |
| 43958  | Q023000 | Fetus/neonate affected by twin-to-twin transplacental transf |
| 23617  | L22..00 | Malposition and malpresentation of fetus                     |
| 68016  | L253.11 | Fetus with suspected rubella damage via mother               |
| 65716  | Q011.00 | Fetus/neonate affected maternal premature rupture membrane   |
| 20721  | 7F0..11 | Fetus operations                                             |
| 59580  | 7F0..12 | Fetus & gravid uterus ops                                    |
| 72558  | Q016.00 | Fetus or neonate affected by maternal death                  |
| 38043  | Q200500 | Cerebral haematoma in fetus or newborn                       |
| 52299  | Q007200 | Fetus/neonate affected by placental/breast transfer narcotic |
| 68169  | Q021.00 | Fetus/neonate affect other placental separation/haemorrhage  |
| 37055  | Q035500 | Fetus/neonate affected by maternal pethidine in labour/deliv |
| 16963  | 7F00000 | Fetoscopic blood transfusion of fetus                        |
| 61596  | Q017300 | Fetus or neonate affected by oblique lie before labour       |
| 55761  | Q021500 | Fetus or neonate affected by premature placental separation  |
| 44644  | L250.00 | Fetus with central nervous system malformation               |
| 58187  | Lyu4500 | [X]Obstructed labour due to other abnormalities of fetus     |
| 108080 | Qyu0.00 | [X]Fetus/newborn affected by maternal factors+complications  |
| 91434  | L251.12 | Suspect mongol fetus                                         |
| 42661  | Q021011 | Fetus affected by APH - antepartum haemorrhage               |
| 63309  | Q037312 | Fetus/neonate affected by uterine dysfunction in labour/del  |
| 95638  | Q101.11 | Fetus small-for-dates (SFD) with signs of malnutrition       |
| 69015  | L251.11 | Suspect cystic fibrosis fetus                                |
| 64430  | Q007C00 | Fetus/neonate affected-plac./breast transfer addictive drug  |
| 59171  | Q017400 | Fetus or neonate affected by transverse lie before labour    |
| 57828  | 7F03200 | Percutaneous blood transfusion of fetus                      |
| 24701  | 2754    | O/E - fetus very active                                      |
| 72833  | Q02z.00 | Fetus/neonate affected by abnormalities chorion/amnion NOS   |
| 104029 | Qyu0B00 | [X]Fetus and newborn affected by other maternal medication   |
| 70901  | Q023100 | Fetus/neonate affected by feto-maternal transplacental trans |
| 7103   | Q000.11 | Fetus affected by maternal toxemia                           |
| 109421 | Q03y400 | Fetus or neonate affected by long labour                     |
| 20544  | Q031611 | Fetus/neonate affected-cephalopelvic disproportion lab./del. |
| 99563  | 27A..11 | O/E - VE - descent of fetus                                  |
| 50555  | Q012.00 | Fetus or neonate affected by maternal oligohydramnios        |
| 101603 | Q010.00 | Fetus or neonate affected by maternal incompetent cervix     |
| 72348  | Q007800 | Fetus/neonate affected-plac./breast transfer chemotherapy    |
| 30692  | L251.00 | Fetus with chromosomal abnormality                           |
| 45856  | Q002.00 | Fetus or neonate affected by maternal infections             |
| 49959  | Q005.00 | Fetus or neonate affected by maternal injury                 |

|        |         |                                                              |
|--------|---------|--------------------------------------------------------------|
| 93329  | Q007400 | Fetus/neonate affected-placental/breast transfer anti-infect |
| 72729  | L253.00 | Fetus with viral damage via mother                           |
| 63648  | Q021000 | Fetus/neonate affected by antepartum haemorrhage unspecified |
| 96742  | Q007300 | Fetus/neonate affected-placenta/breast transfer hallucinogen |
| 68851  | Q00..00 | Fetus or neonate affected by maternal medical problems       |
| 54690  | L250400 | Maternal care for CNS malformation in fetus                  |
| 108565 | Qyu0700 | [X]Fetus+newborn affectd/oth+unspcfd conditns/umbilical cord |
| 108626 | Qyu7.00 | [X]Digestive system disorders of fetus and newborn           |
| 38660  | Q3...00 | Fetus and newborn respiratory conditions                     |
| 42226  | Q017200 | Fetus or neonate affected by external version before labour  |
| 71951  | Q037300 | Fetus or neonate affected by uterine inertia or dysfunction  |
| 71552  | L235.00 | Large fetus causing disproportion                            |
| 67572  | Q031000 | Fetus/neonate affected by mat bony pelvis abn in labour/del  |
| 65059  | Qyu5.00 | [X]Haemorrhagic+haematolog disorders of fetus and newborn    |
| 68687  | L266300 | Suspected macroscopic fetus                                  |
| 52726  | Q031500 | Fetus/neonate affected by face presentation during labour/de |
| 27447  | Q031z00 | Fetus/neonate affected by malposition/disproportion NOS      |
| 54311  | Q02..00 | Fetus/neonate affected by complic of placenta/cord/membrane  |
| 100074 | 7F01.00 | Diagnostic endoscopic examination of fetus using fetoscope   |
| 101984 | 7F03.00 | Therapeutic percutaneous operations on fetus                 |
| 70393  | 7F04.00 | Diagnostic percutaneous examination of fetus                 |
| 102078 | Q027z00 | Fetus or neonate affected by chorioamnionitis                |
| 58773  | Q026.00 | Fetus or neonate affected by other specified cord problems   |
| 102535 | 7F00.12 | Therapeutic foetoscopic operations on fetus                  |
| 35777  | Q417.00 | Intracranial nontraumatic haemorrhage of fetus and newborn   |
| 31496  | Q007900 | Fetus/neonate affected-plac./breast transfer uterine depress |
| 107153 | Q007x00 | Fetus/neonate affected - placental/breast transfer toxic NEC |
| 40376  | PH11.00 | Harlequin fetus                                              |
| 56666  | L256.00 | Fetus with radiation damage                                  |
| 73323  | L254.00 | Fetus with damage due to other maternal disease              |
| 73373  | Q001.00 | Fetus or neonate affected by maternal renal/urinary disease  |
| 96331  | L258.00 | Fetus with cardiovascular abnormality                        |
| 105261 | Q007500 | Fetus/neonate affected-placental/breast transfer immune sera |
| 57651  | 7F02.00 | Selective destruction of fetus                               |
| 97611  | 7F03400 | Percutaneous insertion of bladder drain to fetus             |
| 108731 | 7F03y00 | Other specified therapeutic percutaneous operation on fetus  |
| 70074  | Q3y..00 | Other specified respiratory problems in fetus or neonate     |
| 69814  | Q022000 | Fetus or neonate affected by placental dysfunction           |
| 69533  | L257.12 | Fetus with damage due to intra-uterine contraceptive device  |
| 95909  | Q026400 | Fetus or neonate affected by vasa praevia of cord            |
| 55410  | L251000 | Fetus with chromosomal abnormality unspecified               |
| 37180  | 272..11 | O/E - lie of fetus                                           |
| 69076  | Q031300 | Fetus/neonate affected by shoulder presentation - labour/del |
| 61640  | L252000 | Fetus with hereditary disease unspecified                    |
| 96614  | Q035100 | Fetus/neonate affected by mat analgesic agent in labour/del  |

|        |         |                                                              |
|--------|---------|--------------------------------------------------------------|
| 42213  | Q021100 | Fetus or neonate affected by abruptio placentae              |
| 104989 | Q018.00 | Fetus or neonate affected by maternal postnatal depression   |
| 70739  | L25yz00 | Fetus with other damage NEC NOS                              |
| 42384  | Q031400 | Fetus or neonate affected by transverse lie in labour/deliv  |
| 72757  | Q007100 | Fetus/neonate affected by placental/breast transfer alcohol  |
| 51296  | Q03y200 | Fetus or neonate affected by induction of labour             |
| 111265 | Qyu6.00 | [X]Transitory endocr & metab disord specif to fetus/newborn  |
| 59070  | Q037.00 | Fetus or neonate affected by abnormal uterine contractions   |
| 97745  | Q007600 | Fetus/neonate affected-plac./breast transfer anticonvulsant  |
| 27670  | L255300 | Maternal care for (suspected) damage to fetus from alcohol   |
| 92824  | Q031z11 | Fetus or neonate affected by obstructed labour NEC           |
| 99473  | Q007.00 | Fetus/neonate affected by poison transferred placenta/breast |
| 50940  | 5391.11 | Fetus - abdominal X-ray, obst.                               |
| 72836  | Q007w00 | Fetus/neonate affected-placenta/breast transfer medicine NEC |
| 97923  | Q025200 | Fetus or neonate affected by knot in cord                    |
| 68577  | Q037100 | Fetus or neonate affected by hypertonic labour               |
| 70165  | Q016.11 | Fetus affected by maternal death                             |
| 107075 | L043z11 | Unspecified inevitable miscarriage without complication      |
| 94976  | L044x11 | Incomplete inevitable miscarriage with unspecified comp      |
| 17625  | L044.11 | Inevitable miscarriage incomp                                |
| 55404  | L045z11 | Complete inevitable miscarriage without complication         |
| 12241  | L02..11 | Missed miscarriage                                           |
| 107604 | L045211 | Complete inevitable miscarriage complicated by embolism      |
| 53836  | L044z11 | Incomplete inevitable miscarriage without complication       |
| 96949  | L02..12 | Silent miscarriage                                           |
| 11323  | L045.11 | Inevitable miscarriage complete                              |
| 108742 | L045x11 | Complete inevitable miscarriage with unspecified comp        |
| 109228 | L043y11 | Unspecified inevitable miscarriage with OS complication      |
| 11234  | L043.11 | Inevitable miscarriage unspecified                           |
| 92284  | L044y11 | Incomplete inevitable miscarriage with other specified comp  |
| 48603  | L040900 | Inevitable miscarriage                                       |
| 99578  | L043x11 | Unspecified inevitable miscarriage with unspec complication  |
| 165    | L04..11 | Miscarriage                                                  |
| 57576  | L045y11 | Complete inevitable miscarriage with OS complication         |
| 3082   | L04..00 | Spontaneous abortion                                         |
| 2187   | L05..00 | Legally induced abortion                                     |
| 68740  | L041x00 | Incomplete spontaneous abortion with complication NOS        |
| 63778  | L042x00 | Complete spontaneous abortion with complication NOS          |
| 69183  | L052100 | Complete legal abortion with delayed/excessive haemorrhage   |
| 102820 | L050200 | Unspecified legal abortion + damage to pelvic organs/tissues |
| 41098  | L050x00 | Unspecified legal abortion with complication NOS             |
| 106524 | L071100 | Unspecified incomplete abortion + delayed/excess haemorrhage |
| 25883  | L071y00 | Unspecified incomplete abortion + no mention of complication |
| 99736  | L042000 | Complete spontaneous abortion + genital tract/pelvic infect  |
| 99590  | L052w00 | Complete legal abortion with other specified complication    |

|        |         |                                                              |
|--------|---------|--------------------------------------------------------------|
| 69190  | L052000 | Complete legal abortion + genital tract or pelvic infection  |
| 3874   | L031200 | Tubal abortion                                               |
| 56325  | L042y00 | Complete spontaneous abortion + no mention of complication   |
| 99955  | L040400 | Unspecified spontaneous abortion with metabolic disorder     |
| 60771  | L05..11 | Elective abortion                                            |
| 31431  | L05..13 | Therapeutic abortion                                         |
| 95625  | L044200 | Incomplete inevitable abortion complicated by embolism       |
| 40258  | L040011 | Spontaneous abortion with sepsis                             |
| 72593  | L044x00 | Incomplete inevitable abortion with unspecified complication |
| 49467  | L06..12 | Self-induced abortion                                        |
| 71289  | L06..11 | Criminal abortion                                            |
| 25605  | L100z00 | Threatened abortion NOS                                      |
| 58137  | L07z.00 | Unspecified abortion NOS                                     |
| 1886   | L072.00 | Unspecified abortion complete                                |
| 70643  | L070.00 | Unspecified abortion                                         |
| 56828  | L041w00 | Incomp spontaneous abortion + other specified complication   |
| 28605  | L051z00 | Incomplete legal abortion NOS                                |
| 38415  | L050z00 | Unspecified legal abortion NOS                               |
| 97991  | L062w00 | Complete illegal abortion with other specified complication  |
| 2034   | L10zz11 | Inevitable abortion                                          |
| 56224  | L070z00 | Unspecified abortion NOS                                     |
| 94404  | L061z00 | Incomplete illegal abortion NOS                              |
| 104747 | L040x00 | Unspecified spontaneous abortion with complication NOS       |
| 8173   | L043.00 | Inevitable abortion unspecified                              |
| 105470 | L040500 | Unspecified spontaneous abortion with shock                  |
| 102090 | L08y.00 | Failed attempted abortion with no mention of complication    |
| 68311  | L044y00 | Incomplete inevitable abortion with OS complication          |
| 9407   | 6776.11 | Abortion counselling                                         |
| 33501  | L045.00 | Inevitable abortion complete                                 |
| 1737   | L02..00 | Missed abortion                                              |
| 41606  | L06..00 | Illegally induced abortion                                   |
| 39470  | L08..00 | Failed attempted abortion                                    |
| 7413   | L041.00 | Spontaneous abortion incomplete                              |
| 1439   | L07..00 | Unspecified abortion                                         |
| 70384  | L050y00 | Unspecified legal abortion with no mention of complication   |
| 1879   | L071.00 | Unspecified abortion incomplete                              |
| 68938  | L040y00 | Unspec spontaneous abortion without mention of complication  |
| 49809  | L0A..00 | Failed attempted abortion                                    |
| 41783  | L041100 | Incomp spontaneous abortion + delayed/excessive haemorrhage  |
| 73445  | L050000 | Unspecified legal abortion + genital tract/pelvic infection  |
| 50612  | L052y00 | Complete legal abortion with no mention of complication      |
| 94359  | L042w00 | Complete spontaneous abortion + other specified complication |
| 68669  | L040w00 | Unspec spontaneous abortion + other specified complication   |
| 58085  | L052z00 | Complete legal abortion NOS                                  |
| 50903  | L0A2.00 | Failed medical abortion comp by delayed/excessive haem'ge    |



|        |         |                                                               |
|--------|---------|---------------------------------------------------------------|
| 33964  | L0A4.00 | Failed medical abortion, without complication                 |
| 56822  | L050.00 | Legal abortion unspecified                                    |
| 51614  | L044z00 | Incomplete inevitable abortion without complication           |
| 41118  | L08z.00 | Failed attempted abortion NOS                                 |
| 45806  | L070x00 | Unspecified abortion with complication NOS                    |
| 39754  | L051.11 | Medical abortion - incomplete                                 |
| 6730   | L051.12 | Surgical abortion - incomplete                                |
| 35184  | L071z00 | Unspecified incomplete abortion NOS                           |
| 105603 | L052500 | Complete legal abortion with shock                            |
| 107159 | L08x.00 | Failed attempted abortion with complication NOS               |
| 7817   | L042.00 | Spontaneous abortion complete                                 |
| 106491 | L050100 | Unspecified legal abortion + delayed/excessive haemorrhage    |
| 66365  | L043y00 | Unspecified inevitable abortion with OS complication          |
| 47931  | L050w00 | Unspecified legal abortion with other specified complication  |
| 47298  | L052.00 | Legal abortion complete                                       |
| 71529  | L060.00 | Illegal abortion unspecified                                  |
| 66561  | L062.00 | Illegal abortion complete                                     |
| 96418  | L06z.00 | Illegally induced abortion NOS                                |
| 56562  | L040z00 | Unspecified spontaneous abortion NOS                          |
| 47435  | L097200 | Readmission for retained product of concept, illegal abortion |
| 72307  | L040000 | Unspec spontaneous abortion + genital tract/pelvic infection  |
| 73443  | L051y00 | Incomplete legal abortion with no mention of complication     |
| 68936  | L051100 | Incomplete legal abortion + delayed or excessive haemorrhage  |
| 96652  | L051w00 | Incomplete legal abortion with other specified complication   |
| 59084  | L071500 | Unspecified incomplete abortion with shock                    |
| 53229  | L060z00 | Unspecified illegal abortion NOS                              |
| 110905 | L070w00 | Unspecified abortion with other specified complication        |
| 29439  | L041z00 | Incomplete spontaneous abortion NOS                           |
| 21805  | L097300 | Readmission for retained product of concept, unspec abortion  |
| 7114   | L044.00 | Inevitable abortion incomplete                                |
| 59572  | L0A3.00 | Failed medical abortion, complicated by embolism              |
| 22379  | L04z.00 | Spontaneous abortion NOS                                      |
| 59116  | L045x00 | Complete inevitable abortion with unspecified complication    |
| 12337  | L051.00 | Legal abortion incomplete                                     |
| 41379  | L052.11 | Medical abortion - complete                                   |
| 49849  | L052.12 | Surgical abortion - complete                                  |
| 906    | L100.00 | Threatened abortion                                           |
| 96598  | Z22CE00 | Number of induced abortions                                   |
| 29940  | L042z00 | Complete spontaneous abortion NOS                             |
| 94270  | L043x00 | Unspecified inevitable abortion with unspec complication      |
| 68511  | L040100 | Unspec spontaneous abortion + delayed/excessive haemorrhage   |
| 68110  | L043z00 | Unspecified inevitable abortion without complication          |
| 101218 | L051700 | Incomplete medical abortion                                   |
| 63777  | L045y00 | Complete inevitable abortion with OS complication             |
| 62659  | Lyu0200 | [X]Other abortion                                             |

|        |         |                                                              |
|--------|---------|--------------------------------------------------------------|
| 101050 | L062000 | Complete illegal abortion + genital tract/pelvic infection   |
| 33770  | L05z.00 | Legally induced abortion NOS                                 |
| 101666 | L070300 | Unspecified abortion with renal failure                      |
| 105921 | L072y00 | Unspecified complete abortion + no mention of complication   |
| 107171 | L042100 | Complete spontaneous abortion +delayed/excessive haemorrhage |
| 42458  | L040.00 | Spontaneous abortion unspecified                             |
| 50653  | L041y00 | Incomp spontaneous abortion with no mention of complication  |
| 67076  | L052x00 | Complete legal abortion with complication NOS                |
| 4708   | 7E08800 | Dilation and curettage removal of missed abortion            |
| 30276  | L041z11 | Retained products after spontaneous abortion                 |
| 29594  | L072z00 | Unspecified complete abortion NOS                            |
| 23693  | L097100 | Readmission for retained produc of concept, legal abortion   |
| 35701  | L100000 | Threatened abortion unspecified                              |
| 33989  | L045z00 | Complete inevitable abortion without complication            |
| 45340  | L040111 | Spontaneous abortion with heavy bleeding                     |
| 102648 | 6776100 | Pre-termination counselling                                  |
| 17294  | 6776.13 | Termination counselling                                      |
| 100568 | 7F10y00 | Other specified surgical induction of labour                 |
| 96821  | Q212000 | Liveborn with prelabour abnormal heart beat                  |
| 23664  | 63E..00 | Labour details                                               |
| 97459  | L300700 | Obstructed labour due to compound presentation               |
| 64976  | Z243200 | First stage of labour not established                        |
| 73308  | L29z.00 | Problems affecting labour NOS                                |
| 66578  | L31..00 | Abnormal forces of labour                                    |
| 54127  | Z255.00 | Observation of second stage of labour                        |
| 109523 | L307000 | Other failed trial of labour unspecified                     |
| 102969 | Q213200 | Liveborn with labour meconium in liquor                      |
| 29434  | 63E3.00 | Normal labour                                                |
| 23316  | L140.11 | False labour                                                 |
| 72779  | L30z.00 | Obstructed labour NOS                                        |
| 67423  | Z23AG00 | Hypertonic lower uterine segment during labour               |
| 72736  | Z246200 | Onset of labour first stage                                  |
| 20809  | L14..00 | Early or threatened labour                                   |
| 3088   | 7F11.00 | Other induction of labour                                    |
| 108764 | L29y.00 | Other problems affecting labour                              |
| 23525  | L141.00 | Other threatened labour                                      |
| 34981  | 7F10z00 | Surgical induction of labour NOS                             |
| 64395  | Z255D00 | Ability to push in labour                                    |
| 70850  | Q212100 | Liveborn with prelabour hypoxia                              |
| 103105 | L293.00 | Septicaemia during labour                                    |
| 63287  | Z24..00 | Labour observations                                          |
| 83541  | Z243500 | Normal length of first stage of labour                       |
| 49302  | Z243100 | First stage of labour established                            |
| 33632  | 7F11200 | Syntocinon induction of labour                               |
| 93041  | Z246700 | Onset of second stage of labour                              |

|        |         |                                                             |
|--------|---------|-------------------------------------------------------------|
| 64692  | L141z00 | Other threatened labour NOS                                 |
| 92738  | ZNA2300 | Does perform labouring activities                           |
| 36756  | L386.00 | Toxic reaction to local anaesthesia during labour and deliv |
| 49858  | Z23G.00 | Uterine observation in labour                               |
| 64206  | L313z00 | Precipitate labour NOS                                      |
| 109569 | L313000 | Precipitate labour unspecified                              |
| 25428  | Z246211 | Start of labour                                             |
| 23674  | L291.11 | Failed medical induction of labour                          |
| 87342  | Z244100 | Observation of duration of labour                           |
| 50876  | H472.00 | Asp pneumonitis due to anaesthesia during labour and deliv  |
| 93735  | Z246A00 | Total duration of labour                                    |
| 71189  | Z244400 | Late onset of labour                                        |
| 22115  | 7F10.00 | Surgical induction of labour                                |
| 59789  | L14z.00 | Early or threatened labour NOS                              |
| 54167  | 6322    | 2nd stage of labour length                                  |
| 44337  | L307.00 | Failed trial of labour unspecified                          |
| 32555  | L351000 | Rupture of uterus during and after labour unspecified       |
| 3004   | L14..11 | Premature labour                                            |
| 30782  | 632Z.00 | Length of labour NOS                                        |
| 65867  | 7M35011 | Entonox analgesia in labour                                 |
| 23549  | L31z.00 | Abnormality of forces of labour NOS                         |
| 66242  | Z243400 | Rapid first stage of labour                                 |
| 59445  | Z243800 | First stage of labour problem                               |
| 94809  | Z256200 | Prolonged third stage of labour                             |
| 99290  | Z255800 | Second stage of labour problem                              |
| 40448  | 7F11100 | Induction of labour using prostaglandins                    |
| 56873  | ZNA2200 | Unable to perform labouring activities                      |
| 88775  | 7F11300 | Medical induction of labour                                 |
| 40724  | Z255700 | Failure to progress in second stage of labour               |
| 45057  | OZ3Z.00 | Other labourer NOS                                          |
| 95570  | L307z00 | Failed trial of labour NOS                                  |
| 64732  | Q213000 | Liveborn with labour abnormal heart beat                    |
| 57002  | L290.11 | Failed mechanical induction of labour                       |
| 13215  | 632..00 | Length of labour                                            |
| 48484  | Z244500 | Relation of onset of labour to due date                     |
| 49953  | 6323    | 3rd stage of labour length                                  |
| 33421  | 7F11000 | Oxytocic induction of labour                                |
| 35628  | L321.00 | Prolonged labour unspecified                                |
| 100252 | Z255J00 | Pushing involuntarily in labour                             |
| 98422  | Q213100 | Liveborn with labour hypoxia                                |
| 63022  | L281500 | Prem rupture of membranes onset of labour after 24 hours    |
| 103000 | L29yz00 | Other problems affecting labour NOS                         |
| 98003  | Z23B400 | Contraction of uterus during labour                         |
| 73319  | L302.00 | Obstructed labour caused by pelvic soft tissues             |
| 55225  | L32z.00 | Prolonged labour NOS                                        |

|        |         |                                                             |
|--------|---------|-------------------------------------------------------------|
| 41036  | 7M35000 | Gas and air analgesia in labour                             |
| 104405 | Z256100 | Normal length of third stage of labour                      |
| 71720  | L350z00 | Rupture of uterus before labour NOS                         |
| 60124  | Z243411 | Rapid progress in first stage of labour                     |
| 71171  | L350000 | Rupture of uterus before labour unspecified                 |
| 106135 | Z244200 | Long duration of labour                                     |
| 94874  | Z244300 | Short duration of labour                                    |
| 103154 | L321z00 | Prolonged labour NOS                                        |
| 65243  | L141000 | Other threatened labour unspecified                         |
| 60255  | L351z00 | Rupture of uterus during and after labour NOS               |
| 99968  | L321000 | Unspecified prolonged labour, unspecified                   |
| 3272   | 7F11z00 | Other induction of labour NOS                               |
| 44306  | L126600 | Eclampsia in labour                                         |
| 48708  | Z244411 | Postmature labour                                           |
| 95354  | Z255300 | Progress of second stage of labour                          |
| 62622  | L30z000 | Obstructed labour NOS, unspecified                          |
| 108419 | L38X.00 | Complication of anaesthesia during labour and deliv unsp    |
| 40702  | Z243600 | Slow progress in first stage of labour                      |
| 37267  | L301400 | Obstructed labour due to generally contracted pelvis        |
| 61611  | 7F1A400 | Trial of labour NEC                                         |
| 22261  | Z241100 | Onset of labour induced                                     |
| 65900  | Z243300 | Progress of labour - first stage                            |
| 32997  | 6321    | 1st stage of labour length                                  |
| 29071  | 7L16000 | Intravenous induction of labour                             |
| 54596  | L140200 | False labour at or after 37 completed weeks of gestation    |
| 42101  | L140z00 | Threatened premature labour NOS                             |
| 32877  | L350.00 | Ruptured uterus before labour                               |
| 107198 | L292000 | Unspecified maternal pyrexia during labour, unspecified     |
| 97907  | L29..00 | Other problems affecting labour                             |
| 819    | L30..00 | Obstructed labour                                           |
| 24447  | 7F25.13 | Monitoring during labour                                    |
| 73331  | Z246900 | Duration of second stage of labour                          |
| 21626  | 63E1.00 | Spontaneous onset of labour                                 |
| 100563 | L302000 | Obstructed labour caused by pelvic soft tissues unspecified |
| 23548  | L301.00 | Obstructed labour caused by bony pelvis                     |
| 104746 | L302z00 | Obstructed labour caused by pelvic soft tissues NOS         |
| 48602  | L32..00 | Long labour                                                 |
| 36655  | Z245.00 | Observation of blood loss in labour                         |
| 99170  | Z243.00 | Observation of first stage of labour                        |
| 25112  | Z241.00 | Labour established                                          |
| 56915  | Z249.00 | Labour problem                                              |
| 62656  | Z255400 | Rapid second stage of labour                                |
| 94396  | L30zz00 | Obstructed labour NOS                                       |
| 29529  | L351.00 | Rupture of uterus during and after labour                   |
| 102136 | L292z00 | Unspecified maternal pyrexia during labour NOS              |

|        |         |                                                              |
|--------|---------|--------------------------------------------------------------|
| 40080  | 7F11y00 | Other specified other induction of labour                    |
| 46297  | Z246311 | Onset of labour pains                                        |
| 60333  | L301500 | Obstructed labour due to pelvic inlet contraction            |
| 85226  | Lyu4000 | [X]Other failed induction of labour                          |
| 103056 | Z244.00 | Observation of pattern of labour                             |
| 64548  | L281300 | Prem rupture of membranes onset of labour within 24 hours    |
| 68319  | L351300 | Rupture of uterus during/after labour with postnatal problem |
| 62278  | L281400 | Premature rupture of membranes, labour delayed by therapy    |
| 22613  | Z248.00 | Normal labour                                                |
| 90775  | Z246.00 | Observation of measures of labour                            |
| 70150  | Z246100 | Duration of labour                                           |
| 28928  | L140.00 | Threatened premature labour                                  |
| 93205  | Z255F00 | Not pushing well in labour                                   |
| 99660  | L300400 | Obstructed labour due to face presentation                   |
| 48274  | Q212200 | Liveborn with prelabour meconium in liquor                   |
| 59296  | L140000 | Threatened premature labour unspecified                      |
| 9294   | L292.00 | Maternal pyrexia during labour, unspecified                  |
| 28830  | Z242.00 | Labour not established                                       |
| 104206 | L29z000 | Problems affecting labour NOS unspecified                    |
| 28700  | 7F1..11 | Labour operations                                            |
| 30001  | L313.00 | Precipitate labour                                           |
| 104716 | Z255E11 | Pushing well in labour                                       |
| 98918  | Z247100 | Expulsion of IUCD during third stage of labour               |
| 62600  | L29zz00 | Problems affecting labour NOS                                |
| 364    | 7F13111 | Lower uterine segment caesarean section (LSCS) NEC           |
| 13315  | 14Y0.00 | Born by caesarean section                                    |
| 13316  | 14Y6.00 | Born by emergency caesarean section                          |
| 29155  | 7F1A000 | Caesarean hysterectomy                                       |
| 10049  | 7F12111 | Elective lower uterine segment caesarean section (LSCS)      |
| 12118  | 7F13300 | Emergency caesarean section                                  |
| 72513  | 7F13200 | Extraperitoneal caesarean section                            |
| 15361  | 14Y2.00 | Born by elective caesarean section                           |
| 8192   | Q473.00 | Other hypothermia of newborn                                 |
| 3007   | Q316.00 | Newborn transitory tachypnoea                                |
| 100616 | ZV30100 | [V]Singleton, born before admission to hospital              |
| 93976  | Qyu4200 | [X]Other bacterial sepsis of newborn                         |
| 56336  | Q40A100 | Sepsis of newborn due to Escherichia coli                    |
| 66999  | Q474111 | Newborn environmental hyperthermia                           |
| 15985  | ZV32.00 | [V]Twin, mate stillborn                                      |
| 59878  | Q463.00 | Transitory ileus of newborn                                  |
| 10452  | 6333    | Twins - both live born                                       |
| 93999  | 6339    | Triplets - 3 still born                                      |
| 99418  | Q482.00 | Central nervous system dysfunction in newborn NOS            |
| 41064  | Q484.00 | Newborn drug reaction and intoxication                       |
| 56888  | Q483000 | Newborn feeding problem, unspecified                         |

|        |         |                                                              |
|--------|---------|--------------------------------------------------------------|
| 13304  | Q480.12 | Seizures in newborn                                          |
| 53052  | Q425.00 | Late anaemia of newborn due to isoimmunisation               |
| 98857  | ZV31200 | [V]Twin, not hospitalised, mate live born                    |
| 38852  | Q311300 | Aspiration of vomit in newborn                               |
| 104697 | G520000 | Acute aseptic myocarditis of the newborn                     |
| 55878  | Q494.00 | Transient myocardial ischaemia of newborn                    |
| 108976 | 6318    | Born in hospital                                             |
| 19577  | Q417100 | Cerebellar (nontraum) and post fossa haemorrhage fet newborn |
| 108501 | Q484z00 | Newborn drug reaction or intoxication NOS                    |
| 88204  | ZV30000 | [V]Singleton, born in hospital                               |
| 98669  | Qyu4100 | [X]Sepsis/newborn due to other+unspecified staphylococcus    |
| 15457  | Q482y00 | Other newborn abnormal cerebral signs                        |
| 21839  | Q480.11 | Fits in newborn                                              |
| 12085  | Q404.11 | Umbilical stump infection of the newborn                     |
| 72669  | Q452.00 | Newborn disseminated intravascular coagulation               |
| 20083  | Q450.00 | Haemorrhagic disease of the newborn                          |
| 38877  | R024z00 | [D]Jaundice (not of newborn) NOS                             |
| 8515   | Q31y111 | Cyanotic attacks of the newborn                              |
| 110616 | 6338    | Triplets-1 live+ 2 still born                                |
| 57128  | 6336    | Triplets - all live born                                     |
| 21468  | ZV29100 | [V]Newborn receiving special care                            |
| 14813  | Q481.00 | Newborn cerebral irritability, unspecified                   |
| 17482  | Q474211 | Thermal injury in newborn NEC                                |
| 47693  | Q40W.00 | Sepsis of newborn due to other+unspecified streptococci      |
| 98366  | Qyu4800 | [X]Sepsis of newborn due to other+unspecified streptococci   |
| 23015  | 6334    | Twins - 1 still + 1 live born                                |
| 106918 | Q44X.00 | Trans disorder carbohydrate metab of fet and newborn unsp    |
| 57783  | Q417000 | Intracerebral (nontraumatic) haemorrhage of fet and newborn  |
| 9477   | Q483.00 | Feeding problems in newborn                                  |
| 32703  | Q21z.12 | Hypoxia in newborn NOS                                       |
| 36071  | Q21z.11 | Anoxia in newborn NOS                                        |
| 70538  | Q475.00 | Oedema of newborn unspecified                                |
| 13300  | Q477.00 | Newborn breast engorgement                                   |
| 56476  | Q482z00 | Central nervous system dysfunction in newborn NOS            |
| 34502  | 6335    | Twins - both still born                                      |
| 63044  | ZV31z00 | [V]Twin, mate liveborn, NOS                                  |
| 19579  | Q448.00 | Newborn late metabolic acidosis                              |
| 90510  | Q44T.00 | Transitory metabolic disturbance of newborn, unspecified     |
| 64600  | Q042.00 | Fet newborn affect mat exposure to environml chem subs       |
| 89262  | Q474z00 | Newborn temperature regulation disorder NOS                  |
| 73978  | Qyu3800 | [X]Other apnoea of newborn                                   |
| 22031  | Q40y200 | Septicaemia of newborn                                       |
| 45750  | Q4z..13 | Newborn death                                                |
| 105039 | 44qW000 | Newborn blood spot screening                                 |
| 98938  | Qyu6C00 | [X]Transitory metabolic disturbance of newborn, unspecified  |

|        |         |                                                              |
|--------|---------|--------------------------------------------------------------|
| 19585  | Q483200 | Slow feeding in newborn                                      |
| 55895  | Q474200 | Hyperthermia in newborn, unspecified                         |
| 31476  | 9114.11 | FP58 - newborn registration                                  |
| 68065  | 9114.12 | GP58 - newborn registration                                  |
| 104239 | Q48F.00 | Hypoxic ischaemic encephalopathy of newborn                  |
| 69413  | ZV33000 | [V]Twin, unspecified, born in hospital                       |
| 54589  | D400700 | Acquired neutropenia in newborn                              |
| 26871  | Q318.00 | Primary sleep apnoea of newborn                              |
| 105139 | Qyu3700 | [X]Other and unspecified atelectasis of newborn              |
| 93859  | Qyu8400 | [X]Hypothermia of newborn, unspecified                       |
| 20478  | ZV27200 | [V]Twins, both live born                                     |
| 42527  | Q42..11 | Isoimmunisation of newborn                                   |
| 98721  | P320011 | Newborn glaucoma                                             |
| 19947  | ZV31.00 | [V]Twin, mate live born                                      |
| 97799  | Qyu3900 | [X]Other specified respiratory conditions of newborn         |
| 3613   | Q40A.00 | Sepsis of the newborn                                        |
| 109480 | 44qW100 | Completion of newborn blood spot screening card              |
| 40296  | Q46X.00 | Intestinal obstruction of newborn, unspecified               |
| 39165  | Q483100 | Newborn regurgitation of food                                |
| 3615   | Q436200 | Newborn physiological jaundice NOS                           |
| 72352  | Q474300 | Transitory fever of newborn                                  |
| 40867  | Q485100 | Withdrawal symptoms from therapeutic use of drugs in newborn |
| 61943  | Q483400 | Rumination in newborn                                        |
| 5173   | Q421.11 | ABO isoimmunisation of the newborn                           |
| 5218   | 6316    | Born before arrival                                          |
| 56210  | Q311100 | Aspiration of liquor or mucus in newborn                     |
| 109128 | Qyu5100 | [X]Other umbilical haemorrhages of newborn                   |
| 108994 | 13lf000 | Unborn child is cause for safeguarding concern               |
| 43366  | Q207011 | Phrenic nerve palsy in newborn                               |
| 52525  | Q462.00 | Newborn swallowing maternal blood - haematemesis/melaena     |
| 61729  | Q482100 | Coma in newborn                                              |
| 99425  | QyuA400 | [X]Disorder of muscle tone of newborn, unspecified           |
| 47446  | Q474000 | Newborn dehydration fever                                    |
| 44256  | 9Ea4.00 | Unborn child at risk physi/ment abnormal serious handicap    |
| 61800  | Q437z00 | Kernicterus of newborn NOS                                   |
| 104301 | 13lv000 | Unborn child subject to child protection plan                |
| 34504  | Q485.00 | Newborn drug withdrawal syndrome                             |
| 23876  | Q487.00 | Umbilical polyp of newborn                                   |
| 56909  | Q411200 | Intraventric (nontraumatic) haemorrhage grade 3 fet newborn  |
| 41053  | Q483z11 | Bottle feeding problem in the newborn                        |
| 95873  | Q446600 | Disturbances of potassium balance of newborn                 |
| 52577  | Q483500 | Underfeeding in newborn                                      |
| 28758  | ZV29200 | [V]Newborn receiving intensive care                          |
| 47227  | ZV27300 | [V]Twins, one live born and one stillborn                    |
| 38890  | ZV27400 | [V]Twins, both stillborn                                     |

|        |         |                                                             |
|--------|---------|-------------------------------------------------------------|
| 44238  | ZV31000 | [V]Twin, born in hospital, mate live born                   |
| 50017  | Q472.00 | Newborn cold injury syndrome                                |
| 101103 | Q214200 | Liveborn with meconium liquor, unspecified                  |
| 109703 | 41G4.00 | Newborn blood spot specimen received                        |
| 98336  | Q311113 | Aspiration of amniotic fluid in newborn                     |
| 64262  | Q311112 | Aspiration of liquor in newborn                             |
| 36845  | Q311111 | Aspiration of mucus in newborn                              |
| 73521  | QyuA200 | [X]Other disorders of muscle tone of newborn                |
| 72705  | QyuA000 | [X]Oth specified disturbances of cerebral status of newborn |
| 57674  | Q411100 | Intraventric (nontraumatic) haemorrhage grade 2 fet newborn |
| 65792  | Q484000 | Grey syndrome of newborn                                    |
| 68254  | Q474100 | Newborn environmental pyrexia                               |
| 19576  | Q31y600 | Apnoea of newborn                                           |
| 97418  | Q30..12 | Pulmonary hypoperfusion syndrome of newborn                 |
| 108359 | ZV30200 | [V]Singleton, born outside hospital and not hospitalised    |
| 101529 | ZV32z00 | [V]Twin, mate stillborn, NOS                                |
| 86001  | ZV32000 | [V]Twin, born in hospital, mate stillborn                   |
| 95736  | Qyu8000 | [X]Other hypothermia of newborn                             |
| 48664  | Q444111 | Hypocalcaemic tetany in newborn                             |
| 11509  | Q483300 | Vomiting in newborn                                         |
| 99244  | Q446500 | Disturbances of sodium balance of newborn                   |
| 19578  | Q483600 | Overfeeding in newborn                                      |
| 39691  | Q40A000 | Sepsis of newborn due to Staphylococcus aureus              |
| 93597  | Q311200 | Aspiration of blood in newborn                              |
| 72704  | Qyu3000 | [X]Other respiratory distress of newborn                    |
| 94759  | Q214000 | Liveborn with abnormal heart beat, unspecified              |
| 103401 | Q466111 | Intestinal obstruction in newborn due to faecoliths         |
| 104825 | Q453.00 | Other newborn transient coagulation defect                  |
| 47317  | Q483z00 | Newborn feeding problem NOS                                 |
| 53402  | Q483z12 | Breast feeding problem in the newborn                       |
| 110294 | QyuA100 | [X]Other feeding problems of newborn                        |
| 73036  | 6337    | Triplets -2 live+ 1 still born                              |
| 59694  | Q411000 | Intraventric (nontraumatic) haemorrhage grade 1 fet newborn |
| 20005  | Q480.00 | Convulsions in newborn                                      |
| 26682  | Q404.00 | Omphalitis of the newborn                                   |
| 37044  | Q450.11 | Vitamin K deficiency of the newborn                         |
| 25091  | Z23AP00 | Premature uterine contraction                               |
| 102737 | L112300 | Premature separation of placenta with coagulation defect    |
| 53829  | L281z00 | Premature rupture of membranes NOS                          |
| 424    | L281.00 | Premature rupture of membranes                              |
| 108033 | Lyu3D00 | [X]Other premature separation of placenta                   |
| 69713  | L281000 | Premature rupture of membranes unspecified                  |
| 59452  | L264000 | Intrauterine death unspecified                              |
| 4697   | Q10z.11 | Intrauterine growth retardation                             |
| 1413   | L264.00 | Intrauterine death                                          |



|        |         |                                                              |
|--------|---------|--------------------------------------------------------------|
| 89588  | 7E0A600 | Intrauterine insemination without superovulation donor sperm |
| 37831  | L264z00 | Intrauterine death NOS                                       |
| 111544 | 7E0A500 | Intrauterine insemination without superovulat partner sperm  |
| 48471  | PF6D200 | Intrauterine amputation of lower limb                        |
| 91652  | 7E0A300 | Intrauterine insemination superovulation partner sperm       |
| 88271  | 7E0A400 | Intrauterine insemination superovulation using donor sperm   |
| 36694  | Q21..11 | Intrauterine hypoxia                                         |
| 9542   | L265311 | Maternal care for intrauterine growth retardation            |
| 57522  | Q451y11 | Neonatal thrombocytopenia due to platelet alloimmunisation   |
| 44062  | A984000 | Neonatal gonococcal conjunctivits                            |
| 41151  | Q406611 | Neonatal viral dacryocystitis or conjunctivitis              |
| 45852  | Q406613 | Neonatal conjunctivitis due to virus                         |
| 18439  | 44qW.00 | Neonatal screening test                                      |
| 63783  | Q407y00 | Other specified neonatal candida infection                   |
| 71752  | Q457000 | Neonatal isoimmune neutropenia                               |
| 30795  | Q492.00 | Neonatal hypertension                                        |
| 109861 | Q444100 | Other neonatal hypocalcaemia                                 |
| 53387  | 14I6.00 | H/O: neonatal abstinence syndrome                            |
| 13297  | Q447.00 | Neonatal hypoglycaemia                                       |
| 110197 | Q44y.00 | Other transitory neonatal endocrine and metabolic problem    |
| 95112  | Q407511 | Neonatal monilial septicaemia                                |
| 31315  | Q41..11 | Neonatal haemorrhage                                         |
| 11629  | 2FX..00 | O/E - Umbilical stump - neonatal                             |
| 99830  | Q446y00 | Other specified transitory neonatal electrolyte disturbance  |
| 52572  | Q406300 | Neonatal dacryocystitis or conjunctivitis due to E.Coli      |
| 67105  | Q446300 | Transitory neonatal hyperkalaemia                            |
| 73994  | Q406400 | Neonatal dacryocystitis/conjunctivitis due to staphylococcus |
| 32722  | 9kJ..00 | Neonatal check - enhanced services administration            |
| 18991  | 313K.00 | Neonatal hearing test                                        |
| 100646 | 67AD.00 | Neonatal feeding education                                   |
| 37782  | F251100 | Neonatal myoclonic epilepsy                                  |
| 70045  | Q45y.00 | Other specified transient neonatal blood disorder            |
| 13302  | Q407.12 | Neonatal thrush                                              |
| 40123  | Q407.11 | Neonatal monilia                                             |
| 72350  | Q451y00 | Other specified transient neonatal thrombocytopenia          |
| 97518  | Q451z00 | Transient neonatal thrombocytopenia NOS                      |
| 48202  | Q48A.00 | Neonatal cerebral leukomalacia                               |
| 29743  | Q407000 | Neonatal candidiasis of mouth                                |
| 29715  | Q406.00 | Neonatal dacryocystitis and conjunctivitis                   |
| 55492  | Q447000 | Iatrogenic neonatal hypoglycaemia                            |
| 69813  | Q407z00 | Neonatal candida infection NOS                               |
| 8069   | Q433A00 | Neonatal jaundice from breast milk inhibitor                 |
| 3211   | Q433200 | Breast feeding inhibitors causing neonatal jaundice          |
| 7818   | Q31y500 | Neonatal snuffles                                            |
| 26686  | Q485200 | Neonatal Abstinence Syndrome                                 |

|        |         |                                                             |
|--------|---------|-------------------------------------------------------------|
| 17940  | F4F5400 | Neonatal nasolacrimal duct obstruction                      |
| 64472  | Q44V.00 | Neonatal goitre, not elsewhere classified                   |
| 32327  | Q406712 | Neonatal conjunctivitis due to chlamydiae                   |
| 94578  | Q457z00 | Transient neonatal neutropenia NOS                          |
| 46817  | Q446200 | Transitory neonatal hyponatraemia                           |
| 93307  | Q41y400 | Neonatal rectal haemorrhage                                 |
| 72370  | J004400 | Neonatal enamel hypoplasia                                  |
| 93210  | Q446z00 | Transitory neonatal electrolyte disturbance NOS             |
| 36127  | Q406412 | Neonatal conjunctivitis due to staphylococcus               |
| 26678  | Q406411 | Neonatal dacryocystitis due to staphylococcus               |
| 21472  | Q441.00 | Neonatal diabetes mellitus                                  |
| 48010  | Q443.00 | Neonatal thyrotoxicosis                                     |
| 39055  | 9kJ0.00 | Neonatal check - enhanced service completed                 |
| 15487  | Q407100 | Neonatal candidiasis of perineum                            |
| 28292  | Q405.00 | Neonatal infective mastitis                                 |
| 16482  | Q407.00 | Neonatal candida infection                                  |
| 2240   | Q4z..12 | Neonatal death                                              |
| 109658 | Qyu5300 | [X]Other neonatal gastrointestinal haemorrhage              |
| 53603  | Q48C.00 | Neonatal hypotension                                        |
| 17496  | Q31y511 | Neonatal sniffles                                           |
| 48638  | Q433800 | Neonatal jaundice with porphyria                            |
| 28341  | Q48y600 | Early neonatal death                                        |
| 44358  | Q44y000 | Transitory neonatal tyrosinaemia                            |
| 63759  | Q406y00 | Other specified neonatal dacryocystitis or conjunctivitis   |
| 23422  | Q406100 | Neonatal conjunctivitis                                     |
| 51913  | Q41y300 | Neonatal melaena                                            |
| 38485  | 7L13000 | Neonatal exchange blood transfusion                         |
| 35727  | Q407200 | Neonatal candidiasis of other skin                          |
| 49769  | ZV29000 | [V]Normal level of neonatal care                            |
| 45303  | Q433000 | Delayed conjugation causing neonatal jaundice, unspecified  |
| 55360  | Q433z00 | Delayed conjugation causing neonatal jaundice NOS           |
| 30742  | F13z500 | Benign neonatal sleep myoclonus                             |
| 21164  | Q48y411 | Neonatal 'craniotabes'                                      |
| 56614  | Q488.00 | Neonatal cerebral ischaemia                                 |
| 104194 | 2L...00 | Neonatal examination                                        |
| 38163  | Q46y100 | Neonatal diarrhoea                                          |
| 45444  | Q457.00 | Transient neonatal neutropenia                              |
| 36564  | Q48y700 | Late neonatal death                                         |
| 45012  | Q44U.00 | Transitory neonatal endocrine disorder, unspecified         |
| 49516  | Q414300 | Neonatal vaginal haemorrhage                                |
| 27845  | Q446000 | Neonatal dehydration                                        |
| 93156  | Q433y11 | Neonatal jaundice - deficiency enzyme for bilirubin conjug. |
| 65686  | Q444.12 | Neonatal hypoparathyroidism                                 |
| 72347  | Q406800 | Neonatal dacryocystitis/conjunctivitis-other inclusion body |
| 72494  | Q406812 | Neonatal conjunctivitis due to other inclusion body         |

|        |         |                                                              |
|--------|---------|--------------------------------------------------------------|
| 43576  | Q406811 | Neonatal dacryocystitis due to other inclusion body          |
| 27962  | Q311400 | Neonatal aspiration of milk and regurgitated food            |
| 24792  | Q31y611 | Neonatal apnoeic attack                                      |
| 106500 | Q44A.00 | Neonatal hypoparathyroidism                                  |
| 27793  | Q406700 | Neonatal dacryocystitis or conjunctivitis due to chlamydiae  |
| 35507  | Q433.00 | Other neonatal jaundice - delayed conjugation other cause    |
| 58833  | Q433700 | Neonatal jaundice with congenital hypothyroidism             |
| 47909  | Q449.00 | Neonatal tetany without calcium or magnesium deficiency      |
| 71056  | Q433y00 | Delayed conjugation causing neonatal jaundice OS             |
| 37776  | Q446100 | Transitory neonatal hypernatraemia                           |
| 91557  | Q406z00 | Neonatal dacryocystitis or conjunctivitis NOS                |
| 23566  | Q490.00 | Neonatal cardiac failure                                     |
| 35477  | Qyu5A00 | [X]Neonatal jaundice from other+unspcf hepatocellular damage |
| 28361  | Q436100 | Transient neonatal hyperbilirubinaemia                       |
| 48869  | Qyu5900 | [X]Neonatal jaundice due/other specifd excessive haemolysis  |
| 64999  | Q406200 | Neonatal dacryocystitis                                      |
| 55634  | Q442.00 | Neonatal myasthenia gravis                                   |
| 18578  | Q47y200 | Neonatal skin infection                                      |
| 20894  | Q444.00 | Neonatal hypocalcaemia                                       |
| 37953  | Q444z00 | Neonatal hypocalcaemia NOS                                   |
| 55689  | Q407500 | Neonatal candida septicaemia                                 |
| 104225 | Q434100 | Giant cell hepatitis causing neonatal jaundice               |
| 39574  | Q406512 | Neonatal conjunctivitis due to other bacteria                |
| 37045  | Q406511 | Neonatal dacryocystitis due to other bacteria                |
| 68264  | Q406600 | Neonatal dacryocystitis or conjunctivitis due to virus       |
| 54971  | Q446.00 | Other transitory neonatal electrolyte disturbance            |
| 66985  | Q433600 | Neonatal jaundice with Gilbert's syndrome                    |
| 39164  | Q430000 | Neonatal jaundice + glucose-6-phosphate dehydrogenase defic. |
| 99435  | N000500 | Neonatal lupus erythematosus                                 |
| 6097   | Q40y100 | Neonatal urinary tract infection                             |
| 40869  | Qyu5B00 | [X]Neonatal jaundice from other specified causes             |
| 57203  | Q445.00 | Neonatal hypomagnesaemia                                     |
| 106854 | Q451100 | Trans neonatal thrombocyto due to idopath matern thrombocyto |
| 54169  | Q491.00 | Neonatal cardiac dysrhythmia                                 |
| 105058 | Qyu3300 | [X]Other neonatal aspiration syndromes                       |
| 109912 | Qyu6200 | [X]Other neonatal hypocalcaemia                              |
| 49462  | Q41y200 | Neonatal haematemesis                                        |
| 110458 | Q32..00 | Neonatal respiratory distress syndrome                       |
| 13301  | Q478.00 | Neonatal erythema toxicum                                    |
| 94612  | Q433500 | Neonatal jaundice with Dubin-Johnson syndrome                |
| 7475   | ZV29212 | [V]Neonatal care on NNU                                      |
| 47540  | ZV29211 | [V]Neonatal care on ITU                                      |
| 68708  | Q406311 | Neonatal dacryocystitis due to E.Coli                        |
| 89700  | Q406312 | Neonatal conjunctivitis due to E.coli                        |
| 71441  | Q451.00 | Transient neonatal thrombocytopenia                          |

|        |         |                                                              |
|--------|---------|--------------------------------------------------------------|
| 63790  | Q46y000 | Neonatal peritonitis NOS                                     |
| 72975  | Qyu6000 | [X]Other neonatal hypoglycaemia                              |
| 96590  | 67AD.11 | Neonatal feeding advice                                      |
| 90526  | Q444011 | Neonatal cows' milk hypocalcaemia                            |
| 71986  | Q446400 | Transitory neonatal hypokalaemia                             |
| 71532  | Q406500 | Neonatal dacryocystitis/conjunctivitis due to other bacteria |
| 6883   | Q317000 | Perinatal bronchopulmonary dysplasia                         |
| 94812  | Qyu3A00 | [X]Oth cardiovascular disorders originating/perinatal period |
| 54248  | Q415.00 | Perinatal adrenal haemorrhage                                |
| 21461  | Q4...00 | Other perinatal conditions                                   |
| 45002  | Q412.00 | Perinatal subarachnoid haemorrhage                           |
| 87844  | 7F2A000 | Obstetric umbilical artery Doppler                           |
| 41899  | L240000 | Congenital abnormality of uterus affecting obstetric care    |
| 25731  | Z27..00 | Obstetric investigative observation                          |
| 101334 | 8HQ2000 | Referral for obstetric ultrasound scan                       |
| 32913  | Z28..00 | Obstetric pelvic observation                                 |
| 34677  | 7F23000 | Immed repair obstetric laceration of uterus or cervix uteri  |
| 58517  | L244012 | Rectocele affecting obstetric care                           |
| 29087  | 7F25z00 | Obstetric monitoring NOS                                     |
| 35601  | 7F23z00 | Immediate repair of obstetric laceration NOS                 |
| 13700  | ZL5D100 | Referral to obstetrician                                     |
| 13317  | 27...00 | Obstetric examination                                        |
| 110628 | L43y.11 | Fat embolism - obstetric                                     |
| 34046  | 7F2..00 | Other obstetric operations                                   |
| 60507  | L35z000 | Obstetric trauma NOS, unspecified                            |
| 56727  | 5392    | Obstetric X-ray - placenta                                   |
| 59623  | L35..00 | Other obstetric trauma                                       |
| 52679  | L417.00 | Obstetric cerebral venous thrombosis                         |
| 13039  | L383.00 | Obstetric toxic reaction to local anaesthesia                |
| 20907  | L244011 | Cystocele affecting obstetric care                           |
| 72298  | L355.00 | Other obstetric pelvic organ damage                          |
| 102027 | L35yz00 | Other obstetric trauma NOS                                   |
| 34210  | L240011 | Bicornuate uterus affecting obstetric care                   |
| 85951  | 7F28z00 | Other non routine obstetric scan NOS                         |
| 34086  | 7Fz..00 | Obstetric operations NOS                                     |
| 67257  | L35y.00 | Other obstetric trauma OS                                    |
| 39036  | 7F...00 | Obstetric operations                                         |
| 11268  | 7F23.12 | Immediate suture of obstetric laceration                     |
| 59059  | L433.12 | Septic obstetric embolism                                    |
| 14970  | 7F23100 | Immed repair obstetric laceration perineum & anal sphincter  |
| 68557  | L353000 | Obstetric laceration of cervix unspecified                   |
| 73797  | L353z00 | Obstetric laceration of cervix NOS                           |
| 101752 | L391000 | Obstetric shock unspecified                                  |
| 85244  | 7F2B.00 | Obstetric ultrasound monitoring                              |
| 95698  | 7F28y00 | Other specified other non routine obstetric scan             |

|        |         |                                                              |
|--------|---------|--------------------------------------------------------------|
| 54473  | L244000 | Other uterine/pelvic floor abnormal affecting obstetric care |
| 85245  | 7F26z00 | Routine obstetric scan NOS                                   |
| 55573  | 8HJ7.00 | Obstetric self-referral                                      |
| 88229  | 7F2A.00 | Obstetric Doppler studies                                    |
| 78449  | 7F28.00 | Other non routine obstetric scan                             |
| 68966  | Lyu7.00 | [X]Other obstetric conditions, not elsewhere classified      |
| 105817 | 9381    | Obstetric coop card issued                                   |
| 93136  | L241000 | Tumour of uterine body affecting obstetric care              |
| 86011  | 7F26.00 | Routine obstetric scan                                       |
| 35558  | 584..12 | U-S scan - obstetric, diagn.                                 |
| 55750  | L353.00 | Obstetric laceration of cervix                               |
| 65231  | 9384    | Obstetric coop card updated                                  |
| 106154 | 7F2Ay00 | Other specified obstetric Doppler studies                    |
| 109880 | 7F2Az11 | Obstetric doppler ultrasound NOS                             |
| 48200  | 8HMN.00 | Listed for Obstetric admission                               |
| 51929  | L354.11 | High vaginal laceration - obstetric                          |
| 34843  | L352.11 | Inversion of uterus - obstetric                              |
| 44286  | ZL1C200 | Under care of obstetrician                                   |
| 4797   | 5842    | U-S obstetric scan normal                                    |
| 49661  | 7Fy..00 | Other specified obstetric operations                         |
| 47156  | L357.00 | Obstetric trauma causing pelvic haematoma                    |
| 26698  | 27Z..00 | Obstetric examination NOS                                    |
| 104979 | L354z00 | Obstetric high vaginal laceration NOS                        |
| 94444  | L352z00 | Obstetric inversion of uterus NOS                            |
| 2382   | 584Z.00 | U-S obstetric diagn. scan NOS                                |
| 71742  | L354000 | Obstetric high vaginal laceration unspecified                |
| 20826  | L241011 | Uterine fibroid affecting obstetric care                     |
| 13318  | 271..11 | O/E - fundus size - obstetric                                |
| 94059  | 7F2Az00 | Obstetric Doppler studies NOS                                |
| 28730  | L355.11 | Bladder injury - obstetric                                   |
| 27916  | L353.12 | Tear of cervix - obstetric                                   |
| 86021  | 7F24.00 | Other obstetric operations                                   |
| 22929  | 8H3C.00 | Non-urgent obstetric admission                               |
| 105146 | 7F2Ay11 | Other specified obstetric doppler ultrasound                 |
| 69458  | L354.00 | Obstetric high vaginal laceration                            |
| 33352  | L352.00 | Obstetric inversion of uterus                                |
| 23800  | 7F23.11 | Immediate repair of obstetric tear                           |
| 29685  | 5843    | U-S obstetric scan abnormal                                  |
| 70607  | 7F23300 | Immediate repair of minor obstetric laceration               |
| 24655  | 8H27.00 | Admit obstetric emergency                                    |
| 106067 | L246000 | Other cervical abnormality affecting obstetric care          |
| 53094  | 7F25y00 | Other specified obstetric monitoring                         |
| 98057  | L248000 | Vulval abnormality affecting obstetric care                  |
| 36959  | L391.00 | Obstetric shock                                              |
| 17911  | L416.11 | Piles - obstetric                                            |

|        |         |                                                            |
|--------|---------|------------------------------------------------------------|
| 19800  | 584..00 | Ultrasound in obstetric diagn.                             |
| 62012  | 7F2z.00 | Other obstetric operations NOS                             |
| 60870  | 938Z.00 | Obstetric coop card NOS                                    |
| 20591  | 539..00 | Abdominal obstetric X-ray                                  |
| 23169  | 539Z.00 | Abdominal obstetric X-ray NOS                              |
| 98639  | L43zz00 | Obstetric pulmonary embolism NOS                           |
| 101944 | L43z000 | Obstetric pulmonary embolism NOS, unspecified              |
| 34533  | 8HV6.00 | Private referral to obstetrician                           |
| 35197  | 8HLN.00 | Obstetric D.V. done                                        |
| 104205 | 7F2A100 | Obstetric uterine artery Doppler                           |
| 102802 | 7F2By00 | Other specified obstetric ultrasound monitoring            |
| 12625  | 7F25.00 | Obstetric monitoring                                       |
| 57891  | 7F23.00 | Immediate repair of obstetric laceration                   |
| 54582  | L35zz00 | Obstetric trauma NOS                                       |
| 13965  | 584..13 | Ultra-sound scan - obstetric                               |
| 96343  | 7F26y00 | Other specified routine obstetric scan                     |
| 100451 | 7F24100 | Obstetric uterine tamponade                                |
| 27019  | 5841    | U-S obstetric scan requested                               |
| 87848  | 7F2Bz00 | Obstetric ultrasound monitoring NOS                        |
| 91278  | L357000 | Obstetric pelvic haematoma unspecified                     |
| 36340  | 938..00 | Obstetric coop card                                        |
| 19327  | L411.11 | Perineal obstetric varicose veins                          |
| 20496  | L411.12 | Vulval obstetric varicose veins                            |
| 27650  | L384.00 | Obstetric spinal and epidural anaesthesia-induced headache |
| 107037 | Lyu4C00 | [X]Other specified obstetric trauma                        |
| 43628  | L247011 | Septate vagina affecting obstetric care                    |
| 11988  | 8H57.00 | Obstetric referral                                         |
| 11204  | 271..12 | O/E - uterus size - obstetric                              |
| 48311  | Z261.00 | Observation of gestational sac                             |
| 43004  | Q13..00 | Light for gestational age                                  |
| 22385  | Z22C300 | Length of gestation                                        |
| 91915  | 7M0f400 | From 9 weeks to <14 weeks gestational age                  |
| 50704  | Q113.00 | Light for gestational age                                  |
| 69250  | L169000 | Herpes gestationis unspecified                             |
| 59681  | L41z511 | Gestational phlebitis NOS                                  |
| 34265  | L16C000 | Gestational proteinuria                                    |
| 60330  | L19..00 | Complications specific to multiple gestation               |
| 34505  | 62X3.00 | Full term gestation - 40 weeks                             |
| 90884  | 7M0f200 | 9 - 13 weeks gestational age                               |
| 29565  | L161.13 | Gestational oedema                                         |
| 102435 | 8CE0000 | Gestational diabetes information leaflet given             |
| 34484  | 62X1.00 | Gestation = 24 weeks                                       |
| 49663  | Z261100 | Gestational sac present                                    |
| 7515   | L169.00 | Herpes gestationis                                         |
| 37201  | L16C100 | Gestational oedema with proteinuria                        |

|        |         |                                              |
|--------|---------|----------------------------------------------|
| 50081  | L41z512 | Gestational phlebopathy NOS                  |
| 58971  | L41z513 | Gestational thrombosis NOS                   |
| 16975  | L21..11 | Gestation - multiple                         |
| 97682  | 7M0fy00 | Other specified gestational age              |
| 95702  | 7M0f300 | Under 9 weeks gestational age                |
| 108013 | ZC2CB00 | Dietary advice for gestational diabetes      |
| 26556  | 62X2.00 | Gestation >24 weeks                          |
| 26555  | 62X0.00 | Gestation <24 weeks                          |
| 111075 | Qyu1200 | [X]Other 'heavy for gestational age' infants |
| 86327  | 7M0f000 | Over 20 weeks gestational age                |
| 91101  | 7M0fz00 | Gestational age NOS                          |
| 103954 | 62X5.00 | Length of gestation at time of test          |
| 2664   | L180900 | Gestational diabetes mellitus                |
| 95703  | 7M0f100 | 14 - 20 weeks gestational age                |
| 8446   | L180811 | Gestational diabetes mellitus                |
| 40703  | L169z00 | Herpes gestationis NOS                       |
| 43805  | Z22C312 | Duration of gestation                        |
| 18810  | 62X..00 | Length of gestation                          |
| 103090 | Lyu3000 | [X]Other multiple gestation                  |
| 55352  | 7M0f.00 | Gestational age                              |
| 21526  | L123500 | Gestational hypertension                     |

| colour | condition             | time frame          |
|--------|-----------------------|---------------------|
| green  | pregnancy             | 7/12 mths           |
| blue   | birth                 | <21 days postpartum |
| yellow | abortion/ miscarriage | <5 days             |

#### Appendix 4: Additional CPRD browser medcodes

| Medcode | Readcode | Readterm                                                     |
|---------|----------|--------------------------------------------------------------|
| 6298    | ZV28.00  | [V]Antenatal screening                                       |
| 94405   | L413100  | Antenatal deep vein thrombosis - delivered                   |
| 99188   | L173.00  | Maternal tuberculosis in pregnancy/childbirth/puerperium     |
| 63781   | L410z00  | Varicose veins of legs in pregnancy and puerperium NOS       |
| 45870   | Ly...00  | Complications of pregnancy,childbirth or the puerperium OS   |
| 52106   | L412z00  | Superficial thrombophlebitis in pregnancy and puerperium NOS |
| 86991   | L172000  | Other maternal venereal disease, unspec pregnancy/puerperium |
| 4243    | L466.00  | Galactorrhoea in pregnancy and the puerperium                |
| 70092   | L460.00  | Retracted nipple in pregnancy, the puerperium or lactation   |

|        |         |                                                              |
|--------|---------|--------------------------------------------------------------|
| 16995  | L462.00 | Breast engorgement in pregnancy, the puerperium or lactation |
| 59573  | L176500 | Viral hepatitis comp pregnancy, childbirth & the puerperium  |
| 88361  | L248.11 | Persistent hymen in pregnancy, childbirth and the puerperium |
| 31610  | L248.13 | Vulval abnormality in pregnancy/childbirth/puerperium        |
| 92998  | Lyu1.00 | [X]Oedema,proteinuria+hypertens in pregnancy,childbrth,puerp |
| 20597  | 12G4.00 | FH: Multiple pregnancy                                       |
| 28446  | Lz...00 | Complications of pregnancy,childbirth and the puerperium NOS |
| 63835  | L247z11 | Septate vagina in pregnancy/childbirth/puerperium NOS        |
| 109550 | L416400 | Haemorrhoids in pregnancy and puerperium with p/n comp       |
| 59276  | L032.00 | Ovarian pregnancy                                            |
| 65579  | L415.00 | Other phlebitis and thrombosis in pregnancy and puerperium   |
| 93143  | L121.00 | Renal hypertension in pregnancy/childbirth/puerperium        |
| 60154  | L24..00 | Pelvic soft tissue abnormality in pregnancy/childbirth/puerp |
| 71717  | L121100 | Renal hypertension in pregnancy/childbirth/puerp - delivered |
| 24006  | L466100 | Galactorrhoea in pregnancy and the puerperium - delivered    |
| 44069  | L18..00 | Other medical condition in pregnancy/childbirth/puerperium   |
| 47918  | L090300 | Salpingitis following abortive pregnancy                     |
| 11152  | L...00  | Complications of pregnancy, childbirth and the puerperium    |
| 63644  | L181z00 | Thyroid dysfunction in pregnancy/childbirth/puerperium NOS   |
| 96004  | L183z00 | Drug dependence during pregnancy/childbirth/puerperium NOS   |
| 1771   | L182.00 | Anaemia during pregnancy, childbirth and the puerperium      |
| 46744  | L41..00 | Venous complications of pregnancy and the puerperium         |
| 90329  | L416z00 | Haemorrhoids in pregnancy and the puerperium NOS             |
| 41050  | Z2...00 | Pregnancy, childbirth and puerperium observations            |
| 39550  | L244z11 | Cystocele in pregnancy, childbirth or the puerperium NOS     |
| 64147  | L244z12 | Rectocele in pregnancy, childbirth or the puerperium NOS     |
| 15297  | L461400 | Cracked nipple in pregnancy/puerperium/lactation + p/n comp  |
| 73717  | L463300 | Other breast disorder in pregnancy/puerperium/lact +a/n comp |
| 98264  | L165200 | Asymptomatic bacteriuria in pregnancy - del with p/n comp    |
| 53310  | L1z..00 | Complications of pregnancy/childbirth/puerperium NOS         |
| 103144 | L416300 | Haemorrhoids in pregnancy and puerperium with a/n comp       |
| 46756  | L184.00 | Mental disorders in pregnancy, childbirth and the puerperium |
| 26023  | L411300 | VV's of perineum/vulva in pregnancy/puerperium + a/n comp    |
| 58140  | L173000 | Maternal tuberculosis,unspec whether in pregnancy/puerperium |
| 73089  | L460000 | Retracted nipple in pregnancy/puerperium/lactation unspec    |
| 67006  | L096400 | Pulmonary embolism following abortive pregnancy              |
| 65085  | L092000 | Bladder damage following abortive pregnancy                  |
| 23840  | L090z00 | Septicaemia NOS following abortive pregnancy                 |
| 51359  | L090200 | Pelvic peritonitis following abortive pregnancy              |
| 106097 | L09y.00 | Other specified complication following abortive pregnancy    |
| 12604  | L120.00 | Benign essential hypertension in pregnancy/childbirth/puerp  |



|        |         |                                                              |
|--------|---------|--------------------------------------------------------------|
| 103683 | 8Hki.00 | Referral to teenage pregnancy and parenting support service  |
| 42091  | L411z00 | Varicose veins of perineum/vulva in pregnancy/puerperium NOS |
| 96437  | L170000 | Maternal syphilis, unspec whether in pregnancy or puerperium |
| 20850  | L244.11 | Cystocele in pregnancy, childbirth and the puerperium        |
| 35903  | L244.12 | Pendulous abdomen in pregnancy,childbirth and the puerperium |
| 39492  | L244.13 | Rectocele in pregnancy, childbirth and the puerperium        |
| 71943  | L411000 | VV's of perineum/vulva in pregnancy/puerperium unspecified   |
| 93583  | L096.00 | Embolism following abortive pregnancy                        |
| 34182  | 1547    | H/O: medical termination of pregnancy                        |
| 70422  | L093400 | Uraemia following abortive pregnancy                         |
| 103222 | L248z11 | Persistent hymen in pregnancy/childbirth/puerperium NOS      |
| 97296  | L461200 | Cracked nipple in pregnancy/puerp/lact - deliv + p/n comp    |
| 5541   | 1544    | H/O: ectopic pregnancy                                       |
| 58982  | L186.00 | Other cardiovascular diseases in pregnancy/childbirth/puerp  |
| 62886  | L461z00 | Cracked nipple in pregnancy, the puerperium or lactation NOS |
| 41473  | L183.00 | Drug dependence in pregnancy, childbirth and the puerperium  |
| 48552  | L010.11 | Anembryonic pregnancy                                        |
| 33634  | L182z00 | Anaemia during pregnancy/childbirth/puerperium NOS           |
| 64384  | L180z00 | Diabetes mellitus in pregnancy/childbirth/puerperium NOS     |
| 25759  | L411.00 | VV's of perineum/vulva in pregnancy/puerperium               |
| 38556  | 67A7.00 | Pregnancy dental advice                                      |
| 41718  | L1y..00 | Complications of pregnancy/childbirth/puerperium OS          |
| 53056  | L246.11 | Polyp of cervix in pregnancy, childbirth and the puerperium  |
| 73557  | L188z00 | Abnormal GTT in pregnancy/childbirth/puerperium NOS          |
| 69012  | L466300 | Galactorrhoea in pregnancy/puerperium with a/n complication  |
| 57131  | L462100 | Breast engorgement in pregnancy/puerperium/lactation - deliv |
| 64260  | L18D.00 | Dis nervous syst complic pregnancy,childbirth and puerperium |
| 59493  | L090400 | Salpingo-oophoritis following abortive pregnancy             |
| 104656 | Ly2..00 | Sequelae of complication pregnancy childbirth and puerperium |
| 16046  | L410.00 | Varicose veins of legs in pregnancy and the puerperium       |
| 72215  | L241z00 | Uterine body tumour in pregnancy/childbirth/puerperium NOS   |
| 13245  | 12G2.00 | FH: Diabetes in pregnancy                                    |
| 106736 | 9mK1.00 | Pertussis vaccination in pregnancy invitation second letter  |
| 66537  | L170100 | Maternal syphilis during pregnancy - baby delivered          |
| 92415  | L095.00 | Shock following abortive pregnancy                           |
| 35273  | L097.00 | Readmission for abortive pregnancy (NHS codes)               |
| 20152  | L090y00 | Sepsis NOS following abortion/ectopic/molar pregnancy        |
| 50009  | L461100 | Cracked nipple in pregnancy/puerperium/lactation - delivered |
| 71162  | L16y100 | Other pregnancy complication - delivered                     |
| 102635 | 8Cg..00 | Pregnancy termination care                                   |
| 104806 | L463100 | Other breast disorder in pregnancy/puerperium/lact - deliv   |

|        |         |                                                              |
|--------|---------|--------------------------------------------------------------|
| 63319  | L096.11 | Embolus following abortive pregnancy                         |
| 94527  | L16y400 | Other pregnancy complication with postnatal complication     |
| 9170   | L12..00 | Hypertension complicating pregnancy/childbirth/puerperium    |
| 73432  | L18z100 | Medical condition NOS during pregnancy - baby delivered      |
| 104466 | L179.00 | HIV disease complicating pregnancy childbirth puerperium     |
| 47197  | L410400 | Varicose veins of legs in pregnancy/puerperium + p/n comp    |
| 54761  | L170.00 | Maternal syphilis in pregnancy/childbirth/puerperium         |
| 63773  | L416100 | Haemorrhoids in pregnancy and the puerperium - delivered     |
| 101499 | L246z12 | Stenosis of cervix in pregnancy/childbirth/puerperium NOS    |
| 33255  | L246z11 | Polyp of cervix in pregnancy/childbirth/puerperium NOS       |
| 56542  | L240z11 | Bicornuate uterus in pregnancy, childbirth or puerperium NOS |
| 41016  | L247.11 | Septate vagina in pregnancy, childbirth and the puerperium   |
| 40262  | L247.13 | Vaginal abnormality in pregnancy/childbirth/puerperium       |
| 6478   | L188.00 | Abnormal glucose tolerance test in pregnancy/childb/puerp    |
| 59910  | L17z.00 | Maternal infect/parasitic dis NOS in pregnancy/childb/puerp  |
| 62052  | L092500 | Uterus damage following abortive pregnancy                   |
| 97836  | L242100 | Uterine operation scar in pregnancy/childbirth/puerp - deliv |
| 99889  | L16A200 | Glycosuria during pregnancy - delivered with p/n comp        |
| 98981  | L166400 | Genitourinary tract infection in pregnancy with p/n comp     |
| 59601  | L462200 | Breast engorgement in pregnancy/puerp/lact - del + p/n comp  |
| 16017  | L166100 | Genitourinary tract infection in pregnancy - delivered       |
| 10205  | ZG9..00 | Advice relating to pregnancy and fertility                   |
| 105500 | L41yz00 | Other venous complication of pregnancy and puerperium NOS    |
| 41283  | L187.00 | Orthopaedic disorders in pregnancy/childbirth/puerperium     |
| 63379  | L183100 | Drug dependence during pregnancy - baby delivered            |
| 38871  | L246.00 | Other cervical abnormality in pregnancy/childbirth/puerp     |
| 47686  | L181.00 | Thyroid dysfunction in pregnancy/childbirth/puerperium       |
| 23691  | L172.00 | Other venereal diseases in pregnancy/childbirth/puerperium   |
| 107197 | L170z00 | Maternal syphilis in pregnancy/childbirth/puerperium NOS     |
| 68215  | L188100 | Abnormal GTT during pregnancy - baby delivered               |
| 40723  | L12z.00 | Unspecified hypertension in pregnancy/childbirth/puerperium  |
| 104542 | 67AH.00 | Education about toxoplasmosis precautions during pregnancy   |
| 97741  | L461000 | Cracked nipple in pregnancy/puerperium/lactation unspecified |
| 67035  | L123200 | Transient hypertension of pregnancy - deliv with p/n comp    |
| 64125  | L09yz00 | Other specified complication NOS follow abortive pregnancy   |
| 57640  | L242z00 | Uterine operation scar in pregnancy/childbirth/puerp NOS     |
| 2924   | 7E06600 | Hysterotomy and termination of pregnancy                     |
| 27952  | ZV13900 | [V]PH comp of pregnancy, childbirth and the puerperium       |
| 53141  | L241.00 | Tumour of uterine body in pregnancy/childbirth/puerperium    |
| 35928  | L463000 | Other breast disorder in pregnancy/puerperium/lact unspec    |
| 40121  | 12G1.00 | FH: Raised B.P. in pregnancy                                 |

|        |         |                                                              |
|--------|---------|--------------------------------------------------------------|
| 11359  | L180.00 | Diabetes mellitus during pregnancy/childbirth/puerperium     |
| 33708  | L182100 | Anaemia during pregnancy - baby delivered                    |
| 58686  | L462000 | Breast engorgement in pregnancy/puerperium/lactation unspec  |
| 6560   | L416.00 | Haemorrhoids in pregnancy and the puerperium                 |
| 98133  | 9Ea0.00 | Risk life pregnant woman greater than if pregnancy terminatd |
| 32950  | L03y100 | Cornual pregnancy                                            |
| 105006 | Q48G.00 | Complication termination pregnancy affecting fetus newborn   |
| 107708 | L415100 | Other phlebitis/thrombosis in pregnancy/puerperium - deliv   |
| 28225  | L240.11 | Bicornuate uterus in pregnancy, childbirth and puerperium    |
| 49789  | L240.12 | Double uterus in pregnancy, childbirth and the puerperium    |
| 56217  | L416000 | Haemorrhoids in pregnancy and the puerperium unspecified     |
| 99154  | L410000 | Varicose veins of legs in pregnancy/puerperium unspecified   |
| 96724  | L162100 | Unspecified renal disease in pregnancy - delivered           |
| 101260 | L10z100 | Early pregnancy haemorrhage NOS - delivered                  |
| 35859  | 67A5.00 | Pregnancy alcohol advice                                     |
| 42598  | L175.00 | Maternal rubella in pregnancy, childbirth and the puerperium |
| 72437  | L248z00 | Vulval abnormality in pregnancy/childbirth/puerperium NOS    |
| 101272 | L462300 | Breast engorgement in pregnancy/puerperium/lact + a/n comp   |
| 92362  | L240z00 | Congenital abnormality uterus in pregnancy/childb/puerp NOS  |
| 63362  | L091100 | Defibrination syndrome following abortive pregnancy          |
| 73311  | L41z.00 | Venous complications of pregnancy and puerperium NOS         |
| 34639  | L180100 | Diabetes mellitus during pregnancy - baby delivered          |
| 43754  | L18z.00 | Medical condition NOS in pregnancy/childbirth/puerperium     |
| 30948  | L150100 | Post-term pregnancy - delivered                              |
| 73647  | L188000 | Abnormal GTT - unspec whether during pregnancy/puerperium    |
| 54681  | L189.00 | Dis resp syst comp pregnancy, childbirth & puerperium        |
| 99365  | L460z00 | Retracted nipple in pregnancy/puerperium/lactation NOS       |
| 64649  | L175100 | Maternal rubella during pregnancy - baby delivered           |
| 28611  | L461.00 | Cracked nipple in pregnancy, the puerperium or lactation     |
| 61144  | L463.00 | Other breast disorder in pregnancy/puerperium/lactation      |
| 50571  | L090100 | Parametritis following abortive pregnancy                    |
| 70342  | L123400 | Transient hypertension of pregnancy + postnatal complication |
| 99422  | L187000 | Orthopaedic disorder - unsp whether in pregnancy/puerperium  |
| 32007  | L090.00 | Genital or pelvic infection following abortive pregnancy     |
| 45242  | L241.11 | Uterine fibroids in pregnancy, childbirth and the puerperium |
| 7270   | 12G4.11 | FH: Twin pregnancy                                           |
| 38440  | L462z00 | Breast engorgement in pregnancy/puerperium/lactation NOS     |
| 89557  | L092300 | Cervix damage following abortive pregnancy                   |
| 41961  | L171.00 | Maternal gonorrhoea during pregnancy/childbirth/puerperium   |
| 50908  | L242.00 | Uterine scar from previous surgery in pregnancy/childb/puerp |
| 16752  | ZV72900 | [V]Pregnancy examination and test                            |

|        |         |                                                              |
|--------|---------|--------------------------------------------------------------|
| 14765  | L462400 | Breast engorgement in pregnancy/puerperium/lact + p/n comp   |
| 15633  | L182000 | Anaemia - unspecified whether in pregnancy or the puerperium |
| 73757  | L247z00 | Vaginal abnormality in pregnancy/childbirth/puerperium NOS   |
| 99389  | L460300 | Retracted nipple in pregnancy/puerperium/lact with a/n comp  |
| 24303  | 9Ea..00 | Reason for termination of pregnancy                          |
| 55757  | L16y200 | Other pregnancy complication - delivered with postnatal comp |
| 67635  | L180000 | Diabetes mellitus - unspec whether in pregnancy/puerperium   |
| 51639  | L241z11 | Uterine fibroid in pregnancy/childbirth/puerperium NOS       |
| 40978  | Z22A700 | Surrogate pregnancy                                          |
| 18944  | 7E07011 | Dilation cervix uteri & curettage for termination pregnancy  |
| 54107  | L10z000 | Early pregnancy haemorrhage NOS unspecified                  |
| 103610 | 9NkN.00 | Seen in early pregnancy unit                                 |
| 70476  | L132100 | Late pregnancy vomiting - delivered                          |
| 23456  | L412.00 | Superficial thrombophlebitis in pregnancy and the puerperium |
| 67377  | L463z00 | Other breast disorder in pregnancy/puerperium/lactation NOS  |
| 94736  | L096600 | Septic embolism following abortive pregnancy                 |
| 94353  | L175000 | Maternal rubella, unspecified whether pregnancy/puerperium   |
| 64127  | L121000 | Renal hypertension in pregnancy/childbirth/puerp unspecified |
| 99594  | L415000 | Other phlebitis/thrombosis in pregnancy/puerperium unsp      |
| 50093  | L093000 | Oliguria following abortive pregnancy                        |
| 28312  | L466z00 | Galactorrhoea in pregnancy and the puerperium NOS            |
| 72944  | L176.00 | Other maternal viral dis. in pregnancy/childbirth/puerperium |
| 49390  | L174.00 | Maternal malaria in pregnancy, childbirth and the puerperium |
| 97629  | L246z00 | Other cervical abnormality in pregnancy/childbirth/puerp NOS |
| 57419  | L167100 | Liver disorder in pregnancy - delivered                      |
| 73927  | L175z00 | Maternal rubella in pregnancy/childbirth/puerperium NOS      |
| 54089  | L466000 | Galactorrhoea in pregnancy and the puerperium unspecified    |
| 94718  | L121z00 | Renal hypertension in pregnancy/childbirth/puerperium NOS    |
| 105918 | L09y400 | Urinary tract infection following abortive pregnancy         |
| 30326  | L090000 | Endometritis following abortive pregnancy                    |
| 38022  | Z22CF00 | Date symptom of pregnancy first noted                        |
| 69703  | L185100 | Congenital cardiovasc dis in pregnancy - baby delivered      |
| 69911  | L18zz00 | Medical condition NOS in pregnancy/childb/puerp NOS          |
| 35680  | Q423.00 | Hydrops fetalis due to isoimmunisation                       |
| 59296  | L140000 | Threatened premature labour unspecified                      |
