# Supplementary material for: Trends in HIV testing in the UK primary care setting: a 15-year retrospective cohort study from 2000 to 2015
Source: PubMed Central journal article supplement — BMJ Open. 2019 Nov 24;9(11):e027744. doi: 10.1136/bmjopen-2018-027744 (PMC6887055; doi:10.1136/bmjopen-2018-027744), 2019-11-24
Supplement: bmjopen-2018-027744supp002.pdf [file bmjopen-2018-027744supp002.pdf]

## Trends in HIV testing in the UK Primary Care setting: A 15 year retrospective cohort study 2000 to 2015

### Supplementary tables

Supplementary table 1: HIV testing rates (per 100,000 person years) for years 2000-2015 (adults >16 years).

| Year | Males, all |       |                 | Females, all |       |                 | Females, excluding antenatal |       |                 |
|------|------------|-------|-----------------|--------------|-------|-----------------|------------------------------|-------|-----------------|
|      | N          | Rate  | 95% C.I.        | N            | Rate  | 95% C.I.        | N                            | Rate  | 95% C.I.        |
| 2000 | 1277056    | 16.4  | (14.2 , 18.7)   | 1332528      | 89.0  | (83.9 , 94.1)   | 1331517                      | 12.8  | (10.8 , 14.7)   |
| 2001 | 1299140    | 21.9  | (19.3 , 24.4)   | 1352604      | 293.1 | (283.9 , 302.3) | 1348950                      | 20.2  | (17.8 , 22.7)   |
| 2002 | 1317701    | 31.4  | (28.3 , 34.5)   | 1367949      | 396.3 | (385.7 , 406.9) | 1363158                      | 28.7  | (25.8 , 31.6)   |
| 2003 | 1341378    | 39.9  | (36.5 , 43.3)   | 1388107      | 501.9 | (490.0 , 513.7) | 1382140                      | 36.5  | (33.3 , 39.8)   |
| 2004 | 1359662    | 52.5  | (48.6 , 56.4)   | 1403681      | 563.0 | (550.5 , 575.5) | 1397351                      | 54.7  | (50.7 , 58.7)   |
| 2005 | 1374451    | 74.2  | (69.6 , 78.8)   | 1418325      | 653.1 | (639.7 , 666.6) | 1411272                      | 77.0  | (72.3 , 81.6)   |
| 2006 | 1390451    | 87.5  | (82.5 , 92.4)   | 1433622      | 711.6 | (697.7 , 725.6) | 1426111                      | 80.9  | (76.0 , 85.7)   |
| 2007 | 1405428    | 89.4  | (84.3 , 94.4)   | 1447828      | 795.2 | (780.5 , 809.9) | 1439651                      | 94.3  | (89.1 , 99.4)   |
| 2008 | 1409645    | 106.6 | (101.1 , 112.1) | 1455081      | 781.9 | (767.4 , 796.5) | 1447676                      | 113.1 | (107.4 , 118.7) |
| 2009 | 1418613    | 120.0 | (114.3 , 125.8) | 1463654      | 797.9 | (783.2 , 812.6) | 1456530                      | 128.6 | (122.6 , 134.6) |
| 2010 | 1424751    | 130.2 | (124.2 , 136.2) | 1470650      | 870.7 | (855.4 , 886.0) | 1463009                      | 145.3 | (139.0 , 151.6) |
| 2011 | 1421140    | 147.2 | (140.8 , 153.6) | 1474837      | 795.9 | (781.2 , 810.5) | 1468256                      | 169.0 | (162.1 , 175.8) |
| 2012 | 1427981    | 159.5 | (152.9 , 166.2) | 1482930      | 772.8 | (758.4 , 787.1) | 1476875                      | 176.7 | (169.7 , 183.6) |
| 2013 | 1430211    | 152.9 | (146.4 , 159.4) | 1486620      | 669.5 | (656.2 , 682.9) | 1481702                      | 178.9 | (171.9 , 185.9) |
| 2014 | 1436279    | 121.6 | (115.8 , 127.4) | 1487194      | 511.7 | (500.1 , 523.4) | 1483581                      | 141.8 | (135.6 , 148.1) |
| 2015 | 1421880    | 92.5  | (87.4 , 97.6)   | 1472023      | 391.5 | (381.2 , 401.7) | 1469400                      | 108.4 | (103.0 , 113.9) |

Supplementary table 2: HIV testing rates (per 100,000 person years) for years 2000-2015 (adults aged 16-44 years).

| Year | Males, all |       |                 | Females, all |        |                   | Females, excluding antenatal |       |                 |
|------|------------|-------|-----------------|--------------|--------|-------------------|------------------------------|-------|-----------------|
|      | N          | Rate  | 95% C.I.        | N            | Rate   | 95% C.I.          | N                            | Rate  | 95% C.I.        |
| 2000 | 671088     | 25.5  | (21.6 , 29.4)   | 655488       | 177.4  | (167.2 , 187.7)   | 654477                       | 22.5  | (18.8 , 26.1)   |
| 2001 | 681216     | 31.9  | (27.6 , 36.2)   | 665358       | 589.8  | (571.2 , 608.3)   | 661708                       | 35.8  | (31.2 , 40.4)   |
| 2002 | 688746     | 46.8  | (41.5 , 52.0)   | 672213       | 799.5  | (778.0 , 821.0)   | 667427                       | 52.3  | (46.7 , 57.8)   |
| 2003 | 698982     | 60.5  | (54.7 , 66.4)   | 681748       | 1012.9 | (989.0 , 1036.9)  | 675788                       | 66.7  | (60.5 , 73.0)   |
| 2004 | 706120     | 80.9  | (74.1 , 87.6)   | 688504       | 1132.5 | (1107.2 , 1157.8) | 682186                       | 98.4  | (90.7 , 106.1)  |
| 2005 | 710489     | 107.4 | (99.7 , 115.1)  | 694232       | 1308.9 | (1281.8 , 1335.9) | 687190                       | 134.0 | (125.2 , 142.8) |
| 2006 | 714842     | 131.1 | (122.6 , 139.6) | 700086       | 1428.5 | (1400.4 , 1456.7) | 692589                       | 139.8 | (130.7 , 148.8) |
| 2007 | 717434     | 133.5 | (124.9 , 142.2) | 704167       | 1598.2 | (1568.4 , 1627.9) | 696009                       | 160.6 | (151.0 , 170.3) |
| 2008 | 711542     | 159.1 | (149.7 , 168.5) | 702985       | 1586.6 | (1556.9 , 1616.3) | 695600                       | 206.5 | (195.4 , 217.5) |
| 2009 | 708782     | 181.0 | (170.9 , 191.1) | 700970       | 1618.4 | (1588.3 , 1648.5) | 693867                       | 225.9 | (214.3 , 237.4) |
| 2010 | 702732     | 195.7 | (185.2 , 206.2) | 696368       | 1789.0 | (1757.3 , 1820.6) | 688743                       | 262.4 | (250.0 , 274.7) |
| 2011 | 690732     | 225.9 | (214.5 , 237.2) | 689820       | 1636.2 | (1605.6 , 1666.7) | 683258                       | 301.1 | (287.7 , 314.5) |
| 2012 | 685037     | 236.9 | (225.3 , 248.6) | 685234       | 1598.0 | (1567.8 , 1628.2) | 679201                       | 313.2 | (299.6 , 326.8) |
| 2013 | 675812     | 232.6 | (221.0 , 244.2) | 677984       | 1385.4 | (1357.0 , 1413.7) | 673088                       | 315.1 | (301.4 , 328.9) |
| 2014 | 668263     | 174.8 | (164.6 , 185.0) | 667048       | 1056.2 | (1031.2 , 1081.2) | 663464                       | 238.6 | (226.5 , 250.8) |
| 2015 | 639033     | 136.6 | (127.4 , 145.9) | 638248       | 839.3  | (816.5 , 862.1)   | 635636                       | 190.1 | (179.0 , 201.1) |
