# Supplementary figures and images for: Trends in HIV testing in the UK primary care setting: a 15-year retrospective cohort study from 2000 to 2015
Source: PubMed Central journal article supplement — BMJ Open. 2019 Nov 24;9(11):e027744. doi: 10.1136/bmjopen-2018-027744 (PMC6887055; doi:10.1136/bmjopen-2018-027744), 2019-11-24

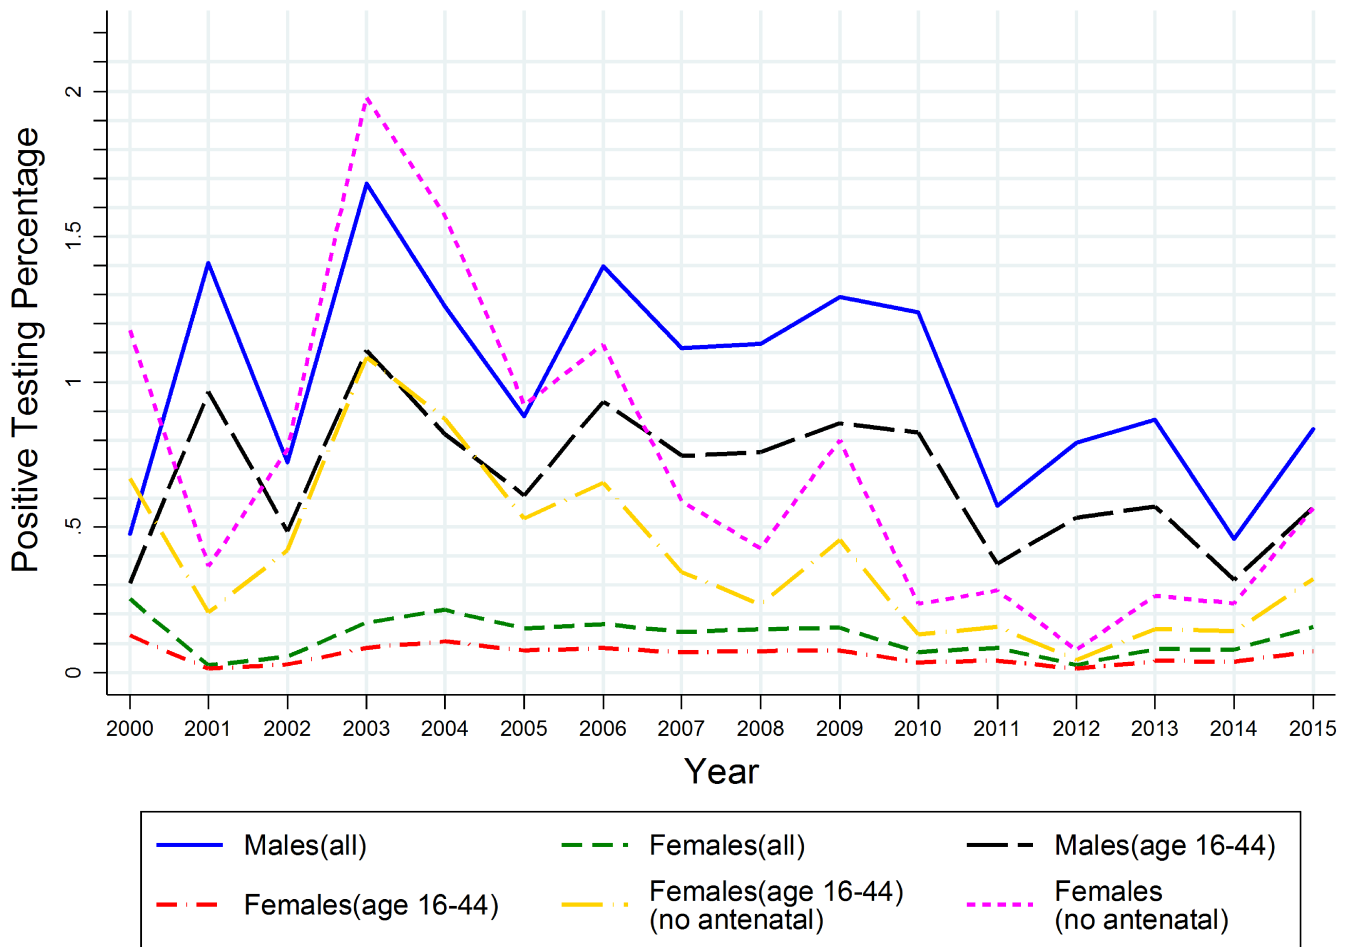

Supplement: bmjopen-2018-027744supp003.pdf [file bmjopen-2018-027744supp003.pdf]
